# Supplementary material for: Mitochondrial respiration contributes to the interferon gamma response in antigen-presenting cells
Source: eLife. 2021 Nov 2;10:e65109. doi: 10.7554/eLife.65109 (PMC8598164; doi:10.7554/eLife.65109)
Supplement: Figure 1—source data 1. [file elife-65109-fig1-data1.xlsx]

## Sheet: Sheet1
SupplementaryFile1. Whole genome profiling of macrophage MHCII, CD40 and PD-L1 expression
Analysis performed using MAGeCK-MLE (Li et al . 2015); for additional details, see Materials and Methods
For each marker (MHCII, CD40, PD-L1), genes were tested for positive or negative enrichment; the cumulative effect of a gene on a marker was calculated as the beta-positive minus the beta-negative for each marker
"beta": selection coefficient (enrichment) for given gene for indicated selection (MHCII, CD40, PD-L1, High- or Low-expressing)
"z": z-score
"p-value": P value derived from permutation testing
"fdr": false discovery rate derived from permutaiton testing
"wald-p-value": P value derived from Wald test
"wald-fdr": false discovery rate derived from Wald test
		Summative Gene Enrichment (Pos minus Neg)			MHCII Positive Selection (MHCII-high enriched)						MHCII Negative Selection (MHCII-low enriched)						CD40 Positive Selection (CD40-high enriched)						CD40 Negative Selection (CD40-low enriched)						PD-L1 Positive Selection (PD-L!-high enriched)						PD-L1 Negative Selection (PD-L1-low enriched)
Gene	sgRNA	MHCII	CD40	PDL1	mhc|beta	mhc|z	mhc|p-value	mhc|fdr	mhc|wald-p-value	mhc|wald-fdr	mhc|beta	mhc|z	mhc|p-value	mhc|fdr	mhc|wald-p-value	mhc|wald-fdr	cd40|beta	cd40|z	cd40|p-value	cd40|fdr	cd40|wald-p-value	cd40|wald-fdr	cd40|beta	cd40|z	cd40|p-value	cd40|fdr	cd40|wald-p-value	cd40|wald-fdr	pdl1|beta	pdl1|z	pdl1|p-value	pdl1|fdr	pdl1|wald-p-value	pdl1|wald-fdr	pdl1|beta	pdl1|z	pdl1|p-value	pdl1|fdr	pdl1|wald-p-value	pdl1|wald-fdr
0610009B22Rik	4	-0.157738	0.08965	0.68608	-0.015248	-0.037972	0.76468	0.97515	0.96971	0.99617	0.14249	0.36267	0.96101	0.996	0.71685	0.97857	0.23219	0.58573	0.26277	0.88048	0.55805	0.99998	0.14254	0.36846	0.77678	0.98287	0.71253	0.99996	0.20312	0.5068	0.78288	0.98842	0.61229	0.8499	-0.48296	-1.2318	0.25296	0.87176	0.21801	0.6043
0610010F05Rik	4	-0.451612	-0.30109	-0.79678	-0.39989	-1.5209	0.16873	0.79764	0.12828	0.88163	0.051722	0.13243	0.83976	0.9877	0.89465	0.99163	0.19237	0.7391	0.34152	0.91261	0.45985	0.99998	0.49346	1.2999	0.16268	0.81363	0.19365	0.99996	-0.42984	-1.6349	0.26425	0.87176	0.10208	0.46666	0.36694	0.95587	0.55015	0.95412	0.33914	0.70312
0610010K14Rik	4	0.35613	0.309358	-0.00234	0.86195	1.4033	0.012353	0.43257	0.16051	0.88954	0.50582	1.1528	0.26704	0.89851	0.24897	0.95279	0.27115	0.44269	0.19582	0.84181	0.65799	0.99998	-0.038208	-0.08845	0.7993	0.98669	0.92952	0.99996	0.93684	1.5281	0.02191	0.50231	0.12649	0.49975	0.93918	2.1755	0.034975	0.59585	0.029596	0.33799
0610030E20Rik	4	-0.364282	0.68261	-0.356126	-0.39458	-1.0457	0.17371	0.80135	0.29569	0.89963	-0.030298	-0.080896	0.66728	0.97002	0.93552	0.99328	0.28516	0.78864	0.17711	0.8362	0.43032	0.99998	-0.39745	-1.079	0.22922	0.85682	0.28059	0.99996	-0.4183	-1.1124	0.27345	0.87659	0.26598	0.6257	-0.062174	-0.16742	0.72218	0.9741	0.86704	0.9556
1110004F10Rik	4	0.04355	-0.204906	-0.08649	-0.57783	-1.458	0.074272	0.69487	0.14485	0.88381	-0.62138	-1.6165	0.053226	0.67758	0.10599	0.95279	-0.2304	-0.6108	0.4499	0.94572	0.54133	0.99998	-0.025494	-0.069819	0.82792	0.98951	0.94434	0.99996	0.32552	0.85425	0.55986	0.95957	0.39297	0.72234	0.41201	1.1172	0.47684	0.94082	0.2639	0.64838
1110008P14Rik	4	0.036003	-0.02303	-0.267	0.049402	0.19754	0.92192	0.99682	0.84341	0.98127	0.013399	0.038389	0.75746	0.98142	0.96938	0.99569	-0.18379	-0.73908	0.55854	0.96474	0.45986	0.99998	-0.16076	-0.46684	0.55259	0.95013	0.64061	0.99996	0.30793	1.2357	0.5899	0.96428	0.21657	0.58659	0.57493	1.6677	0.26374	0.87607	0.095377	0.46036
1110032A03Rik	4	-1.07924	-0.29346	-0.38524	-0.45156	-1.493	0.13334	0.77124	0.13544	0.88273	0.62768	1.5644	0.13899	0.81095	0.11773	0.95279	0.19696	0.65928	0.33257	0.91216	0.50972	0.99998	0.49042	1.239	0.16613	0.817	0.21534	0.99996	-0.19709	-0.65342	0.52178	0.95314	0.51349	0.79578	0.18815	0.46932	0.85491	0.99092	0.63884	0.86526
1110038F14Rik	4	-0.03724	-0.15681	-0.206632	0.23911	0.68085	0.62793	0.95775	0.49597	0.93596	0.27635	0.69667	0.66341	0.97002	0.48601	0.95614	-0.0299	-0.085774	0.97819	0.99922	0.93165	0.99998	0.12691	0.32479	0.81496	0.98798	0.74534	0.99996	-0.059842	-0.16992	0.73148	0.98354	0.86507	0.95589	0.14679	0.37218	0.92598	0.99346	0.70976	0.89748
1110051M20Rik	4	0.13659	-0.78335	-0.21101	0.32305	0.83799	0.44609	0.91967	0.40204	0.9239	0.18646	0.39104	0.85913	0.98887	0.69577	0.97531	-0.21784	-0.56736	0.47695	0.9535	0.57047	0.99998	0.56551	1.2036	0.10223	0.75103	0.22874	0.99996	0.80279	2.0939	0.058004	0.6603	0.036265	0.36322	1.0138	2.1532	0.020131	0.52381	0.031303	0.34438
1110059E24Rik	4	-0.16685	0.16504	-0.052081	0.43244	1.0437	0.26313	0.85684	0.29664	0.90086	0.59929	1.338	0.16268	0.82659	0.18091	0.95279	-0.20749	-0.50088	0.50135	0.95536	0.61646	0.99998	-0.37253	-0.84097	0.25383	0.87184	0.40036	0.99996	-0.028971	-0.069638	0.78598	0.98842	0.94448	0.98311	0.02311	0.051418	0.86045	0.99092	0.95899	0.9857
1110059G10Rik	4	-0.31191	-0.22836	-0.066046	0.27391	0.95291	0.55386	0.9455	0.34064	0.91192	0.58582	1.4319	0.17549	0.83628	0.15217	0.95279	0.27798	0.97471	0.18565	0.83753	0.3297	0.99998	0.50634	1.2529	0.14992	0.80087	0.21025	0.99996	-0.056801	-0.19708	0.73733	0.98446	0.84376	0.94897	0.009245	0.022576	0.83529	0.98739	0.98199	0.99444
1110065P20Rik	4	-0.45993	0.48982	-0.15937	-0.3109	-0.92897	0.25499	0.85423	0.35291	0.91246	0.14903	0.55278	0.94616	0.9935	0.58041	0.9581	0.12	0.36192	0.52372	0.95958	0.71741	0.99998	-0.36982	-1.3939	0.25637	0.87357	0.16334	0.99996	0.10747	0.32231	0.97026	0.99906	0.74722	0.90869	0.26684	1.0016	0.71867	0.97376	0.31655	0.68662
1190005I06Rik	4	0.11475	-0.31561	0.19712	0.23907	0.81381	0.62808	0.95775	0.41575	0.92627	0.12432	0.42602	0.99827	0.99995	0.6701	0.97005	-0.1118	-0.38595	0.7628	0.98162	0.69953	0.99998	0.20381	0.71921	0.63911	0.96278	0.47201	0.99996	0.54255	1.8651	0.24554	0.86578	0.062174	0.41235	0.34543	1.2005	0.5866	0.96051	0.22993	0.61487
1190007I07Rik	4	0.02324	-0.13046	-0.25312	-0.37097	-1.678	0.19455	0.82037	0.09334	0.88163	-0.39421	-1.2979	0.16263	0.82659	0.19432	0.95279	-0.30161	-1.3793	0.30954	0.90381	0.16781	0.99998	-0.17115	-0.57093	0.53388	0.94898	0.56805	0.99996	0.24616	1.1235	0.70195	0.97763	0.26122	0.62238	0.49928	1.6642	0.35565	0.91111	0.096077	0.46069
1300017J02Rik	4	0.71861	-0.129898	-0.08667	0.17156	0.58741	0.78313	0.97779	0.55693	0.94385	-0.54705	-1.2778	0.078084	0.72487	0.20131	0.95279	-0.090009	-0.31136	0.83112	0.98712	0.75552	0.99998	0.039889	0.096313	0.98109	0.99778	0.92327	0.99996	0.25269	0.86868	0.69005	0.9768	0.38502	0.71599	0.33936	0.8132	0.59656	0.96072	0.4161	0.75279
1600012H06Rik	4	0.346965	0.016467	-0.34771	0.27715	0.64651	0.54624	0.94348	0.51795	0.93706	-0.069815	-0.1219	0.59016	0.96624	0.90298	0.99196	-0.047255	-0.11235	0.96706	0.99891	0.91054	0.99998	-0.063722	-0.11693	0.7416	0.97913	0.90691	0.99996	0.4325	1.0182	0.38651	0.91106	0.3086	0.65778	0.78021	1.4275	0.096691	0.73354	0.15344	0.5383
1600014C10Rik	4	0.016684	0.16606	-0.08058	-0.061085	-0.189	0.6629	0.96039	0.85009	0.98175	-0.077769	-0.21061	0.57623	0.96574	0.83319	0.98896	-0.1988	-0.6274	0.52138	0.95842	0.5304	0.99998	-0.36486	-1.0087	0.26176	0.87525	0.31314	0.99996	-0.68373	-2.0914	0.12008	0.76528	0.03649	0.36433	-0.60315	-1.6309	0.18179	0.83201	0.10291	0.47187
1700003E16Rik	4	-0.035282	0.025603	0.592646	0.065448	0.19049	0.95887	0.99703	0.84892	0.98175	0.10073	0.3145	0.9455	0.9935	0.75314	0.98236	-0.064931	-0.18946	0.90961	0.99294	0.84973	0.99998	-0.090534	-0.28412	0.68456	0.97284	0.77632	0.99996	0.5194	1.5149	0.27025	0.87477	0.1298	0.50215	-0.073246	-0.22934	0.70439	0.97169	0.81861	0.93998
1700003F12Rik	4	0.76014	-0.60085	0.30433	0.54459	1.5421	0.13619	0.77469	0.12305	0.88163	-0.21555	-0.50924	0.34909	0.92115	0.61058	0.96214	0.26208	0.74311	0.21092	0.85583	0.45742	0.99998	0.86293	2.0967	0.0094555	0.38763	0.03602	0.96469	0.48254	1.3656	0.31635	0.89053	0.17206	0.54563	0.17821	0.42754	0.87189	0.99106	0.66899	0.87901
1700008O03Rik	4	0.56517	0.031965	-0.41631	0.38217	1.4471	0.34116	0.89029	0.14788	0.88381	-0.183	-0.59788	0.3983	0.93453	0.54992	0.95697	-0.063616	-0.24236	0.91388	0.99294	0.8085	0.99998	-0.095581	-0.32457	0.67292	0.96927	0.74551	0.99996	-0.19657	-0.73992	0.52255	0.95314	0.45935	0.76516	0.21974	0.73634	0.79884	0.98207	0.46153	0.77808
1700010I14Rik	4	0.02054	-0.04939	0.205804	-0.17633	-0.6426	0.44431	0.91967	0.52049	0.93709	-0.19687	-0.45788	0.3769	0.92899	0.64704	0.96572	-0.40838	-1.557	0.17366	0.8362	0.11947	0.99998	-0.35899	-0.90004	0.2675	0.876	0.3681	0.99996	-0.050126	-0.18622	0.74806	0.98752	0.85227	0.95155	-0.25593	-0.61137	0.45829	0.93497	0.54096	0.81963
1700017B05Rik	4	-0.594364	0.2197	-0.162683	-0.016834	-0.054517	0.76112	0.97512	0.95652	0.99432	0.57753	1.109	0.18362	0.84452	0.26744	0.95279	0.10873	0.35423	0.55452	0.96474	0.72317	0.99998	-0.11097	-0.21435	0.64399	0.96278	0.83028	0.99996	-0.078363	-0.25354	0.69976	0.97763	0.79985	0.93175	0.08432	0.16214	0.96345	0.99669	0.8712	0.95714
1700020D05Rik	4	0.45467	-0.42912	-0.05497	0.91545	2.0594	0.0079305	0.3741	0.039458	0.88163	0.46078	1.1871	0.32962	0.91896	0.23519	0.95279	-0.27919	-0.62641	0.35001	0.91401	0.53105	0.99998	0.14993	0.38825	0.76	0.98051	0.69783	0.99996	0.33172	0.74452	0.54944	0.95739	0.45656	0.7633	0.38669	0.99946	0.51858	0.94747	0.31757	0.68711
1700025G04Rik	4	0.497808	-0.158546	-1.05882	0.034848	0.072144	0.8874	0.99204	0.94249	0.99273	-0.46296	-0.91471	0.11545	0.77747	0.36034	0.9542	-0.25841	-0.55148	0.39068	0.92428	0.5813	0.99998	-0.099864	-0.20931	0.66387	0.96608	0.83421	0.99996	-0.20702	-0.42806	0.50857	0.95035	0.6686	0.87835	0.8518	1.7858	0.062834	0.67167	0.07413	0.43292
1700029J07Rik	4	-0.08345	-0.0831475	-0.07544	0.13524	0.45938	0.86996	0.9905	0.64596	0.95457	0.21869	0.72345	0.78603	0.98142	0.46941	0.95614	0.0010795	0.0036696	0.87672	0.98922	0.99707	0.99998	0.084227	0.27983	0.91439	0.99511	0.77961	0.99996	0.81037	2.7561	0.054852	0.65118	0.0058496	0.17174	0.88581	2.9428	0.04926	0.62783	0.0032526	0.11676
1700030J22Rik	4	0.37769	0.201973	-0.190403	0.10724	0.32362	0.93859	0.99703	0.74623	0.96974	-0.27045	-1.0774	0.28194	0.90239	0.28132	0.95279	0.091273	0.28211	0.60317	0.97053	0.77786	0.99998	-0.1107	-0.45126	0.64445	0.96278	0.6518	0.99996	-0.17859	-0.53759	0.54735	0.9563	0.59086	0.83866	0.011813	0.047738	0.84114	0.98912	0.96192	0.98676
1700030K09Rik	4	0.00416	-0.386986	-0.253584	0.44395	1.3268	0.24701	0.84767	0.18459	0.89431	0.43979	0.67645	0.36236	0.92754	0.49875	0.95614	-0.0006958	-0.0021381	0.88221	0.98999	0.99829	0.99998	0.38629	0.61807	0.29683	0.89254	0.53653	0.99996	-0.092774	-0.27338	0.67709	0.97432	0.78456	0.92514	0.16081	0.2488	0.90158	0.99206	0.80352	0.93438
1700037C18Rik	4	0.33227	0.134955	-0.07047	-0.15365	-0.61406	0.48213	0.92677	0.53918	0.93928	-0.48592	-1.582	0.10447	0.76279	0.11364	0.95279	0.1757	0.70431	0.37843	0.92001	0.48124	0.99998	0.040745	0.13349	0.98231	0.99778	0.8938	0.99996	0.14922	0.5967	0.88679	0.99544	0.55071	0.81832	0.21969	0.71932	0.79889	0.98207	0.47195	0.7841
1700037H04Rik	4	-0.524257	-0.548549	0.100338	-0.037087	-0.13256	0.71501	0.96877	0.89454	0.98523	0.48717	1.5325	0.2918	0.91024	0.12541	0.95279	-0.52614	-1.8826	0.087591	0.7751	0.059755	0.99998	0.022409	0.071014	0.94093	0.99548	0.94339	0.99996	0.084899	0.30368	0.98775	0.99923	0.76137	0.91507	-0.015439	-0.048576	0.79528	0.98131	0.96126	0.98654
1700066M21Rik	4	0.019189	-1.00643	0.00837	0.069824	0.19857	0.96884	0.99703	0.8426	0.98118	0.050635	0.13106	0.83763	0.9877	0.89573	0.99163	-0.4846	-1.3995	0.11118	0.80068	0.16166	0.99998	0.52183	1.3854	0.13665	0.79433	0.16594	0.99996	0.36127	1.0422	0.5015	0.95035	0.2973	0.65141	0.3529	0.92479	0.57374	0.95783	0.35507	0.71274
1700088E04Rik	4	0.203281	-0.11168	0.03004	-0.030209	-0.08552	0.73113	0.97255	0.93185	0.99143	-0.23349	-0.67919	0.32749	0.91896	0.49702	0.95614	0.18275	0.54544	0.36287	0.91451	0.58545	0.99998	0.29443	0.89551	0.45026	0.93406	0.37051	0.99996	0.14768	0.42579	0.8904	0.99597	0.67026	0.87888	0.11764	0.34975	0.97733	0.99866	0.72653	0.9043
1700109H08Rik	4	0.19113	0.229779	0.62241	-0.307	-0.66731	0.25855	0.85536	0.50457	0.93634	-0.49813	-1.6856	0.098368	0.75214	0.091865	0.95279	0.14753	0.32133	0.44878	0.94572	0.74796	0.99998	-0.082249	-0.28012	0.70266	0.97395	0.77939	0.99996	0.948	2.0655	0.019775	0.48992	0.038876	0.36713	0.32559	1.1083	0.61878	0.96338	0.26772	0.65128
1700123O20Rik	4	-0.349131	-0.630369	0.21775	-0.088161	-0.2386	0.60912	0.95433	0.81142	0.97722	0.26097	0.62284	0.6961	0.97453	0.53339	0.95614	-0.018309	-0.049563	0.94062	0.99607	0.96047	0.99998	0.61206	1.4682	0.076407	0.7164	0.14205	0.99996	0.88433	2.3963	0.032078	0.5453	0.016561	0.28259	0.66658	1.5974	0.17457	0.82322	0.11018	0.48196
1810009A15Rik	4	0.465995	-0.06678	-0.23418	0.43255	0.65799	0.26308	0.85684	0.51054	0.93634	-0.033445	-0.079692	0.66143	0.97002	0.93648	0.99328	0.14285	0.21947	0.46093	0.94745	0.82628	0.99998	0.20963	0.52163	0.62544	0.96132	0.60193	0.99996	-0.22344	-0.33675	0.4865	0.94722	0.73631	0.90413	0.01074	0.025986	0.83905	0.9888	0.97927	0.99305
1810013L24Rik	4	-0.22386	0.73664	-0.17509	0.19452	0.27885	0.73026	0.97218	0.78036	0.97407	0.41838	0.57746	0.39632	0.93453	0.56363	0.95746	-0.16491	-0.24784	0.61065	0.97167	0.80426	0.99998	-0.90155	-1.2476	0.023791	0.52822	0.21219	0.99996	0.22876	0.33237	0.73448	0.98396	0.73961	0.90529	0.40385	0.57142	0.48991	0.94446	0.56772	0.83314
1810024B03Rik	4	-0.148666	0.14345	0.62606	0.0016942	0.0041141	0.80499	0.9805	0.99672	0.9997	0.15036	0.28173	0.94281	0.99251	0.77815	0.98441	-0.65956	-1.6019	0.039195	0.65535	0.10917	0.99998	-0.80301	-1.5111	0.037873	0.61147	0.13075	0.99996	0.34283	0.83451	0.53093	0.95505	0.40399	0.72873	-0.28323	-0.53158	0.4286	0.92775	0.59502	0.84508
1810030O07Rik	4	0.08273	0.018483	-0.87935	0.22165	0.75045	0.66687	0.96052	0.45298	0.93446	0.13892	0.40948	0.96985	0.99812	0.68219	0.97285	-0.072283	-0.24439	0.88501	0.98999	0.80693	0.99998	-0.090766	-0.26884	0.6838	0.97284	0.78805	0.99996	-0.54462	-1.8386	0.18489	0.82912	0.065968	0.42034	0.33473	0.99068	0.60429	0.96072	0.32184	0.69108
1810037I17Rik	4	-0.43511	-0.077361	-1.00485	0.338	0.9326	0.41584	0.91151	0.35103	0.91246	0.77311	1.0332	0.0547	0.67758	0.30149	0.95279	0.097819	0.27084	0.58385	0.96717	0.78651	0.99998	0.17518	0.2367	0.70174	0.97395	0.81289	0.99996	-0.37439	-1.025	0.31371	0.89053	0.30538	0.65584	0.63046	0.84766	0.20462	0.84426	0.39662	0.74083
1810055G02Rik	4	0.704706	0.0722683	0.334879	0.046746	0.1365	0.91571	0.99682	0.89143	0.98481	-0.65796	-2.0074	0.043465	0.65604	0.044704	0.95279	0.079374	0.23262	0.63835	0.97432	0.81606	0.99998	0.0071057	0.021889	0.90483	0.99511	0.98254	0.99996	0.045539	0.13292	0.91678	0.99678	0.89426	0.96659	-0.28934	-0.88875	0.42189	0.92509	0.37414	0.72716
2010315B03Rik	4	-0.16197	-0.66404	0.2646	-0.12972	-0.19214	0.52763	0.93945	0.84763	0.98175	0.03225	0.032142	0.79899	0.98412	0.97436	0.99585	-0.45505	-0.69096	0.13217	0.81727	0.48959	0.99998	0.20899	0.21884	0.62676	0.96132	0.82678	0.99996	0.44687	0.67875	0.36668	0.9056	0.4973	0.78619	0.18227	0.18541	0.86518	0.99092	0.85291	0.95124
2210016F16Rik	4	-0.108152	-0.337009	0.263912	-0.13493	-0.39686	0.51695	0.93534	0.69147	0.96043	-0.026778	-0.099839	0.67424	0.97002	0.92047	0.99236	-0.27671	-0.82615	0.35458	0.91419	0.40872	0.99998	0.060299	0.23004	0.97057	0.99729	0.81806	0.99996	0.22304	0.6622	0.74597	0.98663	0.50785	0.79184	-0.040872	-0.15363	0.75629	0.97618	0.8779	0.95951
2210016L21Rik	4	-0.17622	-0.18783	-0.189141	0.10332	0.2723	0.9481	0.99703	0.78539	0.9748	0.27954	0.71925	0.65589	0.96959	0.47198	0.95614	0.12341	0.3369	0.5134	0.95794	0.73619	0.99998	0.31124	0.83603	0.41874	0.92752	0.40314	0.99996	-0.21971	-0.57688	0.49042	0.94722	0.56402	0.82403	-0.030569	-0.078979	0.772	0.97757	0.93705	0.97834
2210408I21Rik	4	-0.34643	-0.280328	-0.19322	-0.19462	-0.5271	0.41584	0.91151	0.59812	0.94716	0.15181	0.31837	0.9395	0.99251	0.7502	0.98236	0.064702	0.17697	0.68283	0.97931	0.85953	0.99998	0.34503	0.73427	0.36078	0.90873	0.46279	0.99996	-0.69203	-1.8641	0.11636	0.75694	0.062301	0.41264	-0.49881	-1.0461	0.24284	0.86574	0.29553	0.67397
2300009A05Rik	4	0.088003	-0.193201	0.192929	0.14212	0.55228	0.85293	0.98776	0.58076	0.94541	0.054117	0.21729	0.84536	0.98783	0.82799	0.98896	-0.16071	-0.62648	0.62229	0.97283	0.531	0.99998	0.032491	0.13073	0.96294	0.9969	0.89599	0.99996	0.086249	0.33523	0.98988	0.99923	0.73745	0.90449	-0.10668	-0.42914	0.65416	0.96839	0.66782	0.8783
2310009B15Rik	4	0.438702	0.366921	0.29945	0.35261	1.0833	0.39118	0.90475	0.27868	0.89431	-0.086092	-0.30369	0.56108	0.96574	0.76136	0.98242	0.36603	1.1323	0.093437	0.78927	0.25749	0.99998	-0.00089092	-0.0031862	0.88501	0.99482	0.99746	0.99996	0.46579	1.4341	0.33928	0.89557	0.15154	0.52489	0.16634	0.59206	0.89396	0.99193	0.55381	0.82731
2310011J03Rik	4	0.2309	-0.97891	-0.188929	-0.20754	-0.35579	0.39556	0.90475	0.722	0.96512	-0.43844	-0.70321	0.13172	0.80366	0.48193	0.95614	-0.67981	-1.1793	0.034264	0.62991	0.23828	0.99998	0.2991	0.50302	0.44106	0.93406	0.61495	0.99996	-0.068269	-0.11775	0.71588	0.98003	0.90627	0.97015	0.12066	0.19805	0.97138	0.99838	0.84301	0.94877
2310022A10Rik	4	-0.49944	-0.089079	-0.203901	-0.20221	-0.6505	0.40384	0.90724	0.51537	0.93635	0.29723	0.91245	0.6202	0.96624	0.36153	0.9542	0.041591	0.1368	0.75156	0.98162	0.89119	0.99998	0.13067	0.41108	0.80601	0.98669	0.68101	0.99996	-0.0047706	-0.015435	0.82807	0.99033	0.98769	0.99539	0.19913	0.61574	0.83554	0.98739	0.53807	0.81769
2310022B05Rik	4	-0.0589969	0.325403	-0.20934	-0.068733	-0.22036	0.64654	0.95912	0.82559	0.97908	-0.0097361	-0.02101	0.7084	0.9753	0.98324	0.99765	-0.074287	-0.24243	0.87901	0.9897	0.80844	0.99998	-0.39969	-0.87815	0.22729	0.85682	0.37986	0.99996	0.35334	1.1439	0.5137	0.95136	0.25266	0.61625	0.56268	1.2368	0.27726	0.88064	0.21615	0.60252
2310033P09Rik	4	-0.70348	-0.179093	0.13981	-0.15868	-0.54032	0.47359	0.9232	0.58898	0.94564	0.5448	1.8091	0.21875	0.8767	0.070436	0.95279	0.059067	0.20128	0.69981	0.97931	0.84048	0.99998	0.23816	0.79999	0.56291	0.95144	0.42371	0.99996	0.40401	1.3761	0.42941	0.92512	0.16879	0.54301	0.2642	0.87989	0.72299	0.9741	0.37892	0.73047
2310039H08Rik	4	-0.39928	-0.74687	0.34591	0.22106	0.3479	0.66779	0.96052	0.72792	0.96693	0.62034	0.66222	0.14488	0.81415	0.50783	0.95614	-0.26365	-0.42368	0.38	0.92011	0.6718	0.99998	0.48322	0.53084	0.17355	0.82384	0.59553	0.99996	0.81492	1.3174	0.052819	0.64096	0.18769	0.56261	0.46901	0.50443	0.39515	0.92253	0.61396	0.85206
2310057M21Rik	4	-0.01125	0.2605	0.67733	0.31763	0.81298	0.45681	0.91967	0.41623	0.92633	0.32888	0.88069	0.56022	0.96574	0.37848	0.95614	0.49675	1.2832	0.025062	0.58439	0.19942	0.99998	0.23625	0.64533	0.56627	0.95153	0.51871	0.99996	-0.35697	-0.90756	0.33074	0.89148	0.36411	0.70099	-1.0343	-2.7309	0.050226	0.63104	0.0063164	0.17333
2310061I04Rik	4	0.34025	-0.92349	-0.71686	0.51572	0.95474	0.16334	0.79368	0.33971	0.91192	0.17547	0.34522	0.88496	0.99026	0.72993	0.98024	-0.35013	-0.64843	0.23817	0.87223	0.51671	0.99998	0.57336	1.1748	0.096233	0.73584	0.24009	0.99996	-0.36113	-0.66107	0.32683	0.89057	0.50856	0.7921	0.35573	0.71409	0.56916	0.95604	0.47517	0.78606
2410002F23Rik	4	-0.5902	-0.20039	-0.2652	0.21204	0.79869	0.68964	0.96586	0.42447	0.92906	0.80224	1.6724	0.044329	0.65604	0.094446	0.95279	0.13926	0.52758	0.46998	0.95173	0.59779	0.99998	0.33965	0.7108	0.36999	0.91157	0.47721	0.99996	-0.40005	-1.4979	0.28982	0.88215	0.13416	0.50736	-0.13485	-0.28114	0.61156	0.96279	0.77861	0.92533
2410004B18Rik	4	0.44949	-0.106505	-0.00738	0.12315	0.28138	0.89858	0.99354	0.77842	0.97382	-0.32634	-0.69135	0.22332	0.87983	0.48935	0.95614	-0.16331	-0.3851	0.61502	0.97273	0.70016	0.99998	-0.056805	-0.12727	0.7571	0.98009	0.89873	0.99996	0.17206	0.39762	0.84042	0.99256	0.69091	0.887	0.17944	0.39395	0.86976	0.99092	0.69362	0.89032
2510039O18Rik	4	0.15781	-0.53905	-0.02035	0.41461	1.1573	0.29104	0.87103	0.24714	0.89431	0.2568	0.76919	0.70535	0.97475	0.44178	0.95614	-0.38156	-1.0676	0.20172	0.84832	0.28569	0.99998	0.15749	0.47425	0.7419	0.9794	0.63532	0.99996	0.57178	1.6021	0.2156	0.85551	0.10914	0.47613	0.59213	1.7815	0.24574	0.8665	0.074825	0.43426
2610002M06Rik	4	0.31754	0.423009	-0.08062	0.26928	1.0984	0.56403	0.94854	0.27202	0.89431	-0.04826	-0.17261	0.63169	0.96624	0.86296	0.98971	-0.078501	-0.32086	0.86574	0.98838	0.74832	0.99998	-0.50151	-1.8197	0.14951	0.80087	0.068808	0.99996	-0.88141	-3.5647	0.064816	0.6791	0.00036425	0.029127	-0.80079	-2.8441	0.10081	0.74229	0.0044543	0.14352
2610008E11Rik	4	-0.43451	0.24223	-0.36868	-0.15812	-0.6685	0.47461	0.92335	0.50382	0.93634	0.27639	0.76547	0.66341	0.97002	0.44399	0.95614	-0.13636	-0.57758	0.69117	0.97931	0.56355	0.99998	-0.37859	-1.0514	0.24813	0.86719	0.29309	0.99996	0.24978	1.0571	0.69554	0.9768	0.29047	0.6464	0.61846	1.7181	0.2187	0.8537	0.085784	0.44745
2610301B20Rik	4	0.133879	0.002942	0.18647	0.18443	0.47747	0.7537	0.97497	0.63303	0.95305	0.050551	0.16585	0.83763	0.9877	0.86828	0.99008	-0.026408	-0.070514	0.96736	0.99891	0.94378	0.99998	-0.02935	-0.097118	0.81826	0.98846	0.92263	0.99996	0.18319	0.4787	0.81958	0.99003	0.63215	0.86241	-0.0032802	-0.01081	0.81399	0.98276	0.99138	0.99787
2610318N02Rik	4	-0.695215	-0.40984	0.40864	-0.050095	-0.10872	0.68593	0.96586	0.91343	0.98848	0.64512	1.4158	0.12475	0.79034	0.15683	0.95279	-0.18574	-0.41244	0.55391	0.96474	0.68002	0.99998	0.2241	0.50307	0.59229	0.95633	0.61491	0.99996	0.29736	0.65378	0.60876	0.96833	0.51325	0.79566	-0.11128	-0.24151	0.64699	0.96839	0.80916	0.93639
2610507B11Rik	4	1.32923	-0.17386	1.20265	0.41672	0.64993	0.28728	0.86824	0.51573	0.9364	-0.91251	-1.6673	0.010015	0.40825	0.095456	0.95279	-0.32812	-0.51062	0.26806	0.8831	0.60962	0.99998	-0.15426	-0.2951	0.56408	0.95146	0.76792	0.99996	0.98932	1.5487	0.01398	0.41931	0.12145	0.49358	-0.21333	-0.39977	0.50943	0.94671	0.68933	0.88808
2610524H06Rik	4	-0.69793	0.22019	0.57684	-0.1192	-0.25189	0.54629	0.94348	0.80112	0.97651	0.57873	1.1454	0.1824	0.84344	0.25203	0.95279	-0.16164	-0.35256	0.61969	0.97273	0.72442	0.99998	-0.38183	-0.76296	0.24523	0.86665	0.44549	0.99996	0.60238	1.3096	0.18362	0.82912	0.19034	0.56619	0.02554	0.050495	0.86442	0.99092	0.95973	0.98611
2700049A03Rik	4	-0.10185	0.403125	0.532355	-0.20221	-0.68855	0.40384	0.90724	0.49111	0.93596	-0.10036	-0.34218	0.53475	0.96345	0.73222	0.98142	-0.0067154	-0.023019	0.9029	0.99294	0.98164	0.99998	-0.40984	-1.4015	0.21794	0.85313	0.16106	0.99996	0.096485	0.32936	0.99227	0.99964	0.74189	0.9064	-0.43587	-1.4909	0.28636	0.88374	0.136	0.51674
2700062C07Rik	4	-0.16459	1.67008	0.46674	-0.58371	-1.162	0.072238	0.69081	0.24522	0.89431	-0.41912	-0.80045	0.14468	0.81415	0.42345	0.95614	-0.75412	-1.5053	0.02313	0.57	0.13224	0.99998	-2.4242	-4.6347	5.0836e-05	0.02	3.574e-06	0.0078115	-0.89736	-1.7784	0.060902	0.66889	0.07534	0.4355	-1.3641	-2.6138	0.019216	0.51989	0.0089535	0.20878
2700081O15Rik	4	0.019148	0.66712	-0.6794	-0.012708	-0.03005	0.77134	0.97563	0.97603	0.99688	-0.031856	-0.076411	0.66499	0.97002	0.93909	0.99328	-0.48328	-1.1753	0.11214	0.80068	0.23988	0.99998	-1.1504	-2.7887	0.0075746	0.36973	0.0052922	0.51301	-1.4519	-3.107	0.0096589	0.37624	0.0018899	0.084682	-0.7725	-1.8198	0.11037	0.75697	0.068782	0.42521
2700097O09Rik	4	0.287444	-0.62377	-0.69825	0.085204	0.28786	0.99436	0.99913	0.77346	0.97371	-0.20224	-0.57685	0.36963	0.92802	0.56404	0.95746	-0.32206	-1.0911	0.27802	0.89072	0.27522	0.99998	0.30171	0.87672	0.43592	0.93389	0.38064	0.99996	-0.13982	-0.4718	0.60582	0.96768	0.63707	0.86462	0.55843	1.6175	0.28184	0.88146	0.10577	0.47483
2810004N23Rik	4	-0.92973	0.172891	0.478144	0.19987	0.44173	0.71638	0.96899	0.65868	0.95592	1.1296	1.2483	0.0025926	0.19922	0.21192	0.95279	0.025921	0.057889	0.79798	0.982	0.95384	0.99998	-0.14697	-0.16284	0.57699	0.95274	0.87064	0.99996	0.44831	0.99528	0.365	0.90554	0.3196	0.66711	-0.029834	-0.032624	0.77322	0.97757	0.97397	0.99095
2810006K23Rik	4	-0.16174	-0.200803	-0.03976	0.18349	0.7071	0.75604	0.97512	0.4795	0.93596	0.34523	1.4357	0.52702	0.96296	0.15109	0.95279	-0.28597	-1.1012	0.33811	0.91261	0.27081	0.99998	-0.085167	-0.35523	0.69661	0.97395	0.72242	0.99996	0.14043	0.54072	0.90372	0.99608	0.5887	0.83739	0.18019	0.75088	0.86849	0.99092	0.45273	0.77215
2810021J22Rik	4	0.110339	0.215369	0.18806	0.15313	0.62177	0.82675	0.98343	0.53409	0.93854	0.042791	0.16481	0.8205	0.98555	0.86909	0.99008	0.095939	0.39022	0.58955	0.96787	0.69638	0.99998	-0.11943	-0.46632	0.62757	0.96132	0.64099	0.99996	-0.11627	-0.47094	0.64044	0.97186	0.63769	0.86492	-0.30433	-1.1761	0.40745	0.92288	0.23955	0.62278
2900026A02Rik	4	-0.32425	-0.299022	0.01525	-0.23456	-0.67131	0.35423	0.89253	0.50202	0.93634	0.08969	0.22795	0.92253	0.99251	0.81968	0.98841	-0.35746	-1.0252	0.23008	0.86728	0.30526	0.99998	-0.058438	-0.14942	0.75395	0.98009	0.88122	0.99996	0.78411	2.2534	0.064511	0.6791	0.024235	0.32334	0.76886	1.9657	0.1035	0.74442	0.049328	0.39332
3110001I22Rik	4	-0.07891	0.726966	-0.38432	0.30544	0.83616	0.48457	0.92778	0.40306	0.9239	0.38435	1.0732	0.45549	0.9473	0.28319	0.95279	0.054426	0.14888	0.71339	0.97931	0.88165	0.99998	-0.67254	-1.8842	0.069239	0.69627	0.059543	0.99996	0.10381	0.28377	0.97702	0.99923	0.77659	0.9212	0.48813	1.3699	0.36846	0.91123	0.1707	0.55638
3110009E18Rik	4	-0.067236	0.268055	-0.03539	0.068144	0.21826	0.96477	0.99703	0.82723	0.97919	0.13538	0.32004	0.97758	0.9985	0.74893	0.98236	0.069375	0.22417	0.66906	0.97931	0.82262	0.99998	-0.19868	-0.47451	0.48635	0.93879	0.63514	0.99996	0.11025	0.35389	0.96508	0.99906	0.72342	0.89799	0.14564	0.34641	0.92791	0.9939	0.72904	0.90511
3110040N11Rik	4	-0.5595	0.66798	-0.94928	-0.51884	-2.2542	0.09786	0.7258	0.024183	0.85512	0.04066	0.1246	0.81653	0.98524	0.90084	0.99163	-0.17321	-0.7535	0.5869	0.96717	0.45115	0.99998	-0.84119	-2.5881	0.031417	0.57451	0.0096501	0.64543	-0.58215	-2.524	0.16562	0.81757	0.011603	0.24577	0.36713	1.1313	0.54959	0.95412	0.25793	0.64141
3110082I17Rik	4	-0.767605	-0.04907	0.24566	-0.056125	-0.097411	0.67292	0.96221	0.9224	0.98992	0.71148	1.1184	0.081592	0.72855	0.26341	0.95279	-0.21596	-0.37846	0.48122	0.9535	0.70509	0.99998	-0.16689	-0.26443	0.54212	0.94934	0.79145	0.99996	0.7815	1.3733	0.065325	0.6791	0.16966	0.54439	0.53584	0.84644	0.31158	0.89496	0.39731	0.74099
3300002I08Rik	4	0.26007	0.23769	0.30084	-0.23379	-0.54787	0.3556	0.89382	0.58378	0.94556	-0.49386	-0.84612	0.1005	0.75292	0.39749	0.95614	0.39166	0.97313	0.073509	0.75621	0.33049	0.99998	0.15397	0.29072	0.74933	0.98009	0.77127	0.99996	-0.27418	-0.64615	0.42204	0.92396	0.51818	0.79821	-0.57502	-1.001	0.1977	0.84163	0.31682	0.6869
3425401B19Rik	4	-0.55688	0.32614	0.15598	-0.36044	-1.1552	0.20335	0.82074	0.24801	0.89431	0.19644	0.45862	0.83758	0.9877	0.64651	0.96572	-0.19909	-0.6449	0.52082	0.95842	0.51899	0.99998	-0.52523	-1.2465	0.13446	0.79228	0.21258	0.99996	0.3843	1.2426	0.46261	0.94076	0.21402	0.58502	0.22832	0.53967	0.784	0.97918	0.58942	0.8428
4430402I18Rik	4	0.313929	-0.02251	-0.618848	0.34428	1.2484	0.40506	0.90724	0.2119	0.89431	0.030351	0.08068	0.79477	0.98327	0.9357	0.99328	0.2891	1.0545	0.17218	0.8362	0.29167	0.99998	0.31161	0.8392	0.41803	0.92752	0.40136	0.99996	0.047932	0.17345	0.92034	0.99678	0.86229	0.9552	0.66678	1.7914	0.17442	0.82322	0.073226	0.43256
4833420G17Rik	4	-0.3391	-0.181543	-0.18659	0.34611	1.163	0.40222	0.90705	0.24482	0.89431	0.68521	1.6893	0.096436	0.75088	0.091161	0.95279	0.060037	0.20211	0.69773	0.97931	0.83983	0.99998	0.24158	0.59853	0.55549	0.9506	0.54949	0.99996	0.43941	1.4773	0.3767	0.90969	0.13958	0.51218	0.626	1.5477	0.2098	0.84714	0.1217	0.49719
4833439L19Rik	4	-0.076944	0.0558	0.32574	-0.088469	-0.27055	0.60846	0.95433	0.78673	0.9748	-0.011525	-0.028819	0.70434	0.97475	0.97701	0.99603	-0.47538	-1.4781	0.11697	0.80068	0.13939	0.99998	-0.53118	-1.3463	0.13055	0.78665	0.1782	0.99996	-0.77606	-2.3238	0.090285	0.71567	0.020134	0.30395	-1.1018	-2.681	0.040567	0.61555	0.0073404	0.18752
4921507P07Rik	4	-0.391108	-0.367804	-0.15924	-0.30618	-1.026	0.25957	0.85578	0.30489	0.90305	0.084928	0.26729	0.9119	0.99227	0.78925	0.98631	-0.0032241	-0.01096	0.8907	0.99078	0.99126	0.99998	0.36458	1.1728	0.33044	0.90522	0.24086	0.99996	0.20718	0.70024	0.77525	0.98842	0.48378	0.77927	0.36642	1.1687	0.55096	0.95412	0.24254	0.62668
4921517D22Rik	4	0.04665	0.71824	0.475016	-0.14962	-0.51286	0.4892	0.92841	0.60805	0.94821	-0.19627	-0.59302	0.37756	0.92899	0.55316	0.95697	0.2307	0.79844	0.26537	0.88048	0.42462	0.99998	-0.48754	-1.4924	0.15749	0.80998	0.1356	0.99996	0.42706	1.4719	0.3953	0.91603	0.14104	0.51344	-0.047956	-0.14613	0.74475	0.97561	0.88381	0.96116
4921524J17Rik	4	0.06585	0.324572	-0.414352	-0.26892	-0.61285	0.30532	0.87605	0.53998	0.93932	-0.33477	-0.81484	0.21519	0.87567	0.41516	0.95614	0.022152	0.051575	0.81043	0.98285	0.95887	0.99998	-0.30242	-0.76195	0.33323	0.90601	0.44609	0.99996	-0.031842	-0.073032	0.78186	0.98842	0.94178	0.98228	0.38251	0.95976	0.52544	0.94979	0.33717	0.70095
4921536K21Rik	4	-0.142959	-0.368492	0.0626	-0.020279	-0.081716	0.7536	0.97497	0.93487	0.99143	0.12268	0.54992	0.99446	0.9998	0.58238	0.9581	-0.41588	-1.6792	0.16618	0.8362	0.093119	0.99998	-0.047388	-0.21318	0.7783	0.98287	0.83118	0.99996	0.15707	0.63376	0.87149	0.9953	0.52624	0.80306	0.09447	0.42455	0.98119	0.99866	0.67116	0.8798
4930402H24Rik	4	-0.26538	-0.15755	-0.556232	-0.40226	-1.5907	0.16664	0.79477	0.11168	0.88163	-0.13688	-0.46415	0.47303	0.95291	0.64254	0.96572	-0.90942	-3.5976	0.0095064	0.44844	0.00032112	0.65015	-0.75187	-2.5593	0.046871	0.64072	0.010487	0.66626	-0.058062	-0.23	0.73463	0.98396	0.81809	0.9395	0.49817	1.6973	0.35682	0.91111	0.089645	0.45227
4930404N11Rik	4	-0.003944	-0.13401	-0.70066	0.095916	0.28142	0.96721	0.99703	0.77839	0.97382	0.09986	0.23452	0.94342	0.99251	0.81458	0.98841	-0.51399	-1.518	0.093488	0.78927	0.129	0.99998	-0.37998	-0.90329	0.24651	0.86682	0.36637	0.99996	-0.82419	-2.3855	0.078237	0.7037	0.017056	0.28503	-0.12353	-0.29136	0.62742	0.96683	0.77078	0.92265
4930430F08Rik	4	-0.367697	-0.07907	0.01365	0.097703	0.32628	0.96264	0.99703	0.74422	0.96912	0.4654	1.0166	0.32256	0.9181	0.30933	0.95279	0.17923	0.60728	0.37004	0.91746	0.54367	0.99998	0.2583	0.57682	0.52168	0.94594	0.56406	0.99996	-0.67807	-2.2409	0.12211	0.76749	0.025034	0.32633	-0.69172	-1.4859	0.14112	0.79847	0.13732	0.51895
4930432K21Rik	4	-0.13929	-0.12021	-0.48058	0.39976	1.0752	0.31447	0.87892	0.28228	0.89552	0.53905	1.2358	0.22541	0.88239	0.21652	0.95279	0.19325	0.52818	0.33999	0.91261	0.59737	0.99998	0.31346	0.72936	0.41472	0.92695	0.46578	0.99996	0.29501	0.79488	0.61263	0.96928	0.42668	0.74249	0.77559	1.7969	0.099232	0.74141	0.072347	0.43165
4930453N24Rik	4	-0.99729	-0.47729	0.41369	-0.88784	-2.7691	0.013878	0.45719	0.0056211	0.5167	0.10945	0.31395	0.96482	0.99685	0.75356	0.98236	-0.33631	-1.0713	0.25652	0.87757	0.28402	0.99998	0.14098	0.41059	0.78034	0.98328	0.68137	0.99996	0.61694	1.9681	0.16979	0.82091	0.049052	0.38829	0.20325	0.58777	0.82812	0.98572	0.55669	0.82898
4930503L19Rik	4	0.02834	-0.09464	0.43335	0.43956	1.0287	0.25255	0.85141	0.30361	0.90291	0.41122	1.1208	0.40791	0.93761	0.26238	0.95279	-0.2184	-0.5111	0.47598	0.9535	0.60928	0.99998	-0.12376	-0.33853	0.61949	0.96132	0.73496	0.99996	0.66589	1.5611	0.12831	0.77295	0.1185	0.48933	0.23254	0.63584	0.77713	0.97787	0.52488	0.8109
4930550C14Rik	4	0.03285	-0.44352	-0.0987	0.20355	0.60312	0.70876	0.96877	0.54643	0.94153	0.1707	0.42948	0.89589	0.99092	0.66757	0.96893	-0.10644	-0.32037	0.77942	0.982	0.74869	0.99998	0.33708	0.8604	0.374	0.91573	0.38957	0.99996	0.40938	1.2237	0.42184	0.92396	0.22108	0.58997	0.50808	1.2906	0.34492	0.90896	0.19683	0.58285
4930579G24Rik	4	0.04743	-0.235839	0.06413	0.58358	1.3062	0.10411	0.73722	0.19149	0.89431	0.53615	1.1499	0.22876	0.88635	0.2502	0.95279	-0.054479	-0.12214	0.94276	0.99667	0.90279	0.99998	0.18136	0.39394	0.68842	0.97288	0.69363	0.99996	0.56423	1.2635	0.22317	0.85753	0.20639	0.57782	0.5001	1.0793	0.35423	0.91111	0.28046	0.66291
4931406C07Rik	4	0.06223	0.31539	-0.06928	0.22114	0.85753	0.66779	0.96052	0.39115	0.91895	0.15891	0.48078	0.92375	0.99251	0.63067	0.96572	0.12304	0.47795	0.51451	0.95794	0.63268	0.99998	-0.19235	-0.58461	0.49682	0.94019	0.55881	0.99996	0.19956	0.77359	0.78832	0.98842	0.43917	0.75148	0.26884	0.81628	0.71466	0.97261	0.41434	0.75217
4931414P19Rik	4	0.189198	-0.136152	-0.283256	-0.048692	-0.17153	0.68959	0.96586	0.86381	0.98175	-0.23789	-0.5754	0.32205	0.9181	0.56502	0.95746	-0.093908	-0.33405	0.81811	0.98453	0.73834	0.99998	0.042244	0.10417	0.98566	0.99804	0.91703	0.99996	-0.34747	-1.221	0.34192	0.89557	0.22208	0.59075	-0.064214	-0.1569	0.71827	0.97374	0.87532	0.95832
4931428F04Rik	4	-0.545767	-0.372852	0.58847	-0.55631	-1.2886	0.082406	0.70632	0.19753	0.89431	-0.010543	-0.028063	0.70632	0.97475	0.97761	0.99603	-0.040572	-0.095539	0.98882	0.9998	0.92389	0.99998	0.33228	0.91121	0.38239	0.91802	0.36219	0.99996	0.60179	1.4154	0.18408	0.82912	0.15696	0.53004	0.01332	0.035839	0.84368	0.98975	0.97141	0.98957
4932438A13Rik	4	-0.197286	-0.4788	-0.13815	9.3536e-05	0.00038578	0.80118	0.97974	0.99969	1	0.19738	0.63644	0.83483	0.9877	0.52449	0.95614	-0.34686	-1.4443	0.24259	0.87256	0.14866	0.99998	0.13194	0.42823	0.80311	0.98669	0.66848	0.99996	-0.28249	-1.1621	0.41254	0.92393	0.24519	0.61139	-0.14434	-0.4666	0.59743	0.96072	0.64079	0.8659
4933427D14Rik	4	0.0710055	0.65908	-0.092153	0.076794	0.24756	0.98648	0.99774	0.80447	0.97687	0.0057885	0.018859	0.73967	0.98142	0.98495	0.99788	0.52176	1.7126	0.019064	0.53934	0.086792	0.99998	-0.13732	-0.46078	0.59519	0.95712	0.64495	0.99996	0.025877	0.083557	0.88282	0.99544	0.93341	0.9802	0.11803	0.39027	0.97667	0.99866	0.69634	0.89191
4933430I17Rik	4	0.5797	0.03723	-0.46953	0.45506	1.3089	0.23319	0.84155	0.19058	0.89431	-0.12464	-0.31999	0.49326	0.95857	0.74898	0.98236	-0.14388	-0.41589	0.66946	0.97931	0.67749	0.99998	-0.18111	-0.47098	0.51517	0.94401	0.63765	0.99996	0.11339	0.3255	0.95781	0.99862	0.7448	0.90734	0.58292	1.5134	0.25555	0.87201	0.13018	0.50929
4933434E20Rik	4	-0.02242	0.42678	-0.44739	0.20123	0.48993	0.71339	0.96877	0.62418	0.95117	0.22365	0.6	0.77581	0.98142	0.54851	0.95697	0.11419	0.28857	0.53958	0.96351	0.77291	0.99998	-0.31259	-0.871	0.31905	0.90294	0.38375	0.99996	0.17155	0.42143	0.84149	0.99257	0.67344	0.87975	0.61894	1.7235	0.21799	0.8537	0.084797	0.44602
5430427O19Rik	4	-0.79145	-0.30292	-0.52842	-0.5869	-1.6141	0.071069	0.68829	0.10651	0.88163	0.20455	0.60126	0.81801	0.98549	0.54767	0.95697	-0.11542	-0.31889	0.75172	0.98162	0.74981	0.99998	0.1875	0.55663	0.67511	0.97033	0.57778	0.99996	0.18923	0.52209	0.8084	0.99003	0.60161	0.84505	0.71765	2.1272	0.13589	0.79561	0.033407	0.35122
5730409E04Rik	4	-0.54757	1.00466	0.49334	0.43237	1.2446	0.26313	0.85684	0.21327	0.89431	0.97994	1.4944	0.010574	0.41434	0.13507	0.95279	0.18337	0.5374	0.3617	0.91451	0.59099	0.99998	-0.82129	-1.2439	0.034213	0.58707	0.21353	0.99996	0.14008	0.40244	0.90438	0.99608	0.68736	0.88539	-0.35326	-0.53024	0.35646	0.91111	0.59595	0.84531
5730455P16Rik	4	-0.386424	-0.020005	0.1043	0.069646	0.20068	0.96838	0.99703	0.84095	0.98118	0.45607	1.1668	0.33603	0.92085	0.24329	0.95279	0.095005	0.27674	0.59173	0.96839	0.78198	0.99998	0.11501	0.29694	0.8422	0.99115	0.76651	0.99996	-1.0079	-2.8582	0.041635	0.59477	0.0042607	0.14352	-1.1122	-2.8062	0.039398	0.61072	0.0050128	0.15174
6030458C11Rik	4	0.52823	0.028816	-1.04104	0.58632	1.0677	0.10172	0.73132	0.28565	0.89596	0.05809	0.10818	0.85379	0.98887	0.91385	0.99236	0.046551	0.08492	0.73718	0.98033	0.93233	0.99998	0.017735	0.034063	0.93071	0.9952	0.97283	0.99996	-0.03514	-0.063707	0.77551	0.98842	0.9492	0.98511	1.0059	1.9334	0.022114	0.53602	0.053189	0.39809
6430548M08Rik	4	-0.02259	-0.11156	0.08922	-0.21953	-0.53959	0.37593	0.89985	0.58948	0.94564	-0.19694	-0.55108	0.37685	0.92899	0.58158	0.9581	-0.30198	-0.74384	0.30878	0.90296	0.45697	0.99998	-0.19042	-0.53912	0.49962	0.94041	0.58981	0.99996	0.79115	1.9528	0.061969	0.67236	0.050844	0.3918	0.70193	1.9874	0.14666	0.80594	0.046883	0.39003
6430550D23Rik	4	1.48768	0.168655	-0.16184	0.13388	0.39956	0.87271	0.9905	0.68948	0.95978	-1.3538	-3.9991	0.00050836	0.086207	6.3589e-05	0.07358	0.11574	0.34614	0.53525	0.96256	0.72924	0.99998	-0.052915	-0.16201	0.76595	0.98051	0.8713	0.99996	0.39867	1.1907	0.43867	0.93095	0.23378	0.60102	0.56051	1.7122	0.27955	0.88146	0.086852	0.4479
6430571L13Rik	4	0.19611	0.2854	-0.275626	0.39871	1.1425	0.31625	0.88041	0.25326	0.89431	0.2026	0.52491	0.82217	0.98556	0.59964	0.96118	-0.60607	-1.7318	0.053734	0.69539	0.083303	0.99998	-0.89147	-2.3156	0.024757	0.5337	0.02058	0.86135	0.050334	0.14398	0.92461	0.99678	0.88552	0.96383	0.32596	0.84801	0.61812	0.96338	0.39643	0.74083
8030462N17Rik	4	-0.87335	0.466023	-0.89274	-0.32603	-1.0739	0.23786	0.84215	0.28288	0.89552	0.54732	1.2323	0.21666	0.87658	0.21784	0.95279	0.035463	0.11952	0.76895	0.982	0.90486	0.99998	-0.43056	-0.97547	0.2006	0.84304	0.32933	0.99996	-0.15354	-0.50942	0.58421	0.96374	0.61046	0.84917	0.7392	1.6793	0.12053	0.77058	0.093099	0.4579
9030624G23Rik	4	-2.5207	-0.03092	0.26529	-1.7326	-1.9765	5.0836e-05	0.025	0.048099	0.88163	0.7881	0.61272	0.048854	0.67015	0.54006	0.95671	-0.36464	-0.42588	0.22165	0.86237	0.67019	0.99998	-0.33372	-0.26146	0.29394	0.89118	0.79374	0.99996	0.94533	1.1185	0.020284	0.49504	0.26335	0.62402	0.68004	0.53416	0.16349	0.81966	0.59323	0.84421
9130008F23Rik	4	-0.60915	-0.314866	-0.25214	-0.33483	-0.76049	0.22917	0.84045	0.44696	0.93345	0.27432	0.50946	0.66865	0.97002	0.61043	0.96214	-0.26702	-0.61552	0.37354	0.91746	0.53821	0.99998	0.047846	0.090674	0.99939	0.99969	0.92775	0.99996	0.743	1.7164	0.082355	0.70621	0.086085	0.45187	0.99514	1.8861	0.023893	0.54263	0.059286	0.40791
9130019O22Rik	4	-0.643957	-0.13338	0.564703	-0.59116	-2.0811	0.069188	0.68221	0.037422	0.88163	0.052797	0.2009	0.84185	0.98777	0.84078	0.98896	-0.54912	-1.9783	0.076407	0.7614	0.047896	0.99998	-0.41574	-1.6131	0.21341	0.84848	0.10673	0.99996	-0.052467	-0.18765	0.74485	0.98663	0.85115	0.95114	-0.61717	-2.3336	0.17503	0.82322	0.019616	0.29831
9130023H24Rik	4	-0.837818	-0.16549	-0.45368	-0.7569	-1.673	0.028417	0.55567	0.094331	0.88163	0.080918	0.13537	0.90229	0.99168	0.89232	0.99126	-0.21468	-0.49368	0.48411	0.9535	0.62153	0.99998	-0.04919	-0.084391	0.77408	0.98182	0.93275	0.99996	0.73032	1.6815	0.088353	0.71032	0.092672	0.45797	1.184	2.0389	0.0045244	0.30233	0.041461	0.37779
9130401M01Rik	4	0.67628	-0.331229	0.07152	0.48294	1.2802	0.20029	0.82037	0.20048	0.89431	-0.19334	-0.63921	0.38183	0.92992	0.52268	0.95614	-0.009589	-0.025605	0.91246	0.99294	0.97957	0.99998	0.32164	1.095	0.40089	0.92319	0.2735	0.99996	0.36224	0.9611	0.49992	0.95035	0.3365	0.67893	0.29072	0.9774	0.67709	0.96975	0.32837	0.69419
9430015G10Rik	4	-0.212452	-0.31759	0.23715	0.070548	0.26637	0.97097	0.99703	0.78995	0.9748	0.283	0.79501	0.64842	0.96823	0.42661	0.95614	-0.13564	-0.51209	0.69346	0.97931	0.60858	0.99998	0.18195	0.51554	0.6871	0.97288	0.60618	0.99996	0.09509	0.35875	0.99451	0.99964	0.71978	0.89697	-0.14206	-0.39956	0.60068	0.96072	0.68948	0.88808
9430038I01Rik	4	-0.96537	-0.28766	-0.33006	-0.14129	-0.55452	0.50424	0.93148	0.57922	0.9452	0.82408	1.9351	0.038432	0.6354	0.052978	0.95279	-0.04307	-0.17141	0.98002	0.99959	0.8639	0.99998	0.24459	0.57892	0.54949	0.95001	0.56264	0.99996	-0.01399	-0.055146	0.81379	0.99003	0.95602	0.98713	0.31607	0.74164	0.63545	0.96839	0.4583	0.77587
9530068E07Rik	4	0.185339	0.246572	-0.246268	0.070789	0.27792	0.97168	0.99703	0.78107	0.97451	-0.11455	-0.54357	0.51055	0.96151	0.58674	0.95852	0.017232	0.068748	0.82543	0.98712	0.94519	0.99998	-0.22934	-1.1156	0.43714	0.93406	0.26458	0.99996	-0.19352	-0.75849	0.52722	0.95374	0.44816	0.75831	0.052748	0.25377	0.9087	0.99234	0.79967	0.93237
9530077C05Rik	4	0.828796	-0.318321	-0.19363	0.81824	2.2044	0.017233	0.48222	0.027494	0.87315	-0.010556	-0.031509	0.70632	0.97475	0.97486	0.99585	-0.052081	-0.14065	0.95054	0.99744	0.88815	0.99998	0.26624	0.81328	0.50597	0.94185	0.41606	0.99996	-0.31528	-0.83286	0.37415	0.90965	0.40492	0.72909	-0.12165	-0.36578	0.63088	0.96779	0.71453	0.89924
9930012K11Rik	4	-0.456051	-0.59946	0.07885	-0.012351	-0.049473	0.77225	0.9761	0.96054	0.99432	0.4437	1.5245	0.35545	0.9226	0.12739	0.95279	-0.21396	-0.85995	0.48579	0.9535	0.38982	0.99998	0.3855	1.3352	0.29841	0.8928	0.1818	0.99996	-0.66864	-2.6642	0.12531	0.77287	0.0077167	0.20132	-0.74749	-2.5525	0.11921	0.7686	0.010694	0.23244
9930111J21Rik1	4	-0.083102	-0.08338	0.08124	-0.023788	-0.086781	0.74577	0.97378	0.93085	0.99143	0.059314	0.19635	0.85629	0.98887	0.84433	0.98918	-0.29275	-1.073	0.32617	0.91001	0.28327	0.99998	-0.20937	-0.70503	0.46734	0.93643	0.48079	0.99996	0.25659	0.93909	0.6838	0.97609	0.34768	0.68888	0.17535	0.58684	0.87743	0.99169	0.55731	0.82918
A130010J15Rik	4	-0.4225	-0.169854	0.628828	0.13422	0.44062	0.87189	0.9905	0.65949	0.95592	0.55672	1.6114	0.20629	0.86998	0.1071	0.95279	-0.09125	-0.30212	0.82726	0.98712	0.76256	0.99998	0.078604	0.22837	0.92781	0.9952	0.81936	0.99996	0.57094	1.8872	0.21641	0.85551	0.059133	0.4078	-0.057888	-0.1676	0.72925	0.97483	0.86689	0.9556
A430005L14Rik	4	-0.299291	-0.32338	-0.30494	-0.30655	-0.94486	0.25886	0.85565	0.34473	0.91197	-0.0072593	-0.017128	0.71394	0.97745	0.98633	0.998	-0.50167	-1.5612	0.10015	0.79183	0.11847	0.99998	-0.17829	-0.42669	0.52092	0.94594	0.66961	0.99996	0.42165	1.3132	0.40323	0.91834	0.18911	0.56526	0.72659	1.7386	0.12984	0.78949	0.082107	0.44226
A430033K04Rik	4	0.317381	0.196901	-0.21354	0.26969	1.0448	0.56286	0.94844	0.29611	0.90027	-0.047691	-0.1634	0.63301	0.96624	0.8702	0.99008	-0.026889	-0.10543	0.96929	0.99891	0.91603	0.99998	-0.22379	-0.78696	0.44553	0.93406	0.43131	0.99996	0.26183	1.0178	0.67312	0.97332	0.30878	0.65778	0.47537	1.6661	0.38595	0.91813	0.095696	0.46036
A530032D15Rik	4	-0.706684	-0.50338	-0.80773	-0.075224	-0.094015	0.6354	0.95867	0.9251	0.99076	0.63146	0.64922	0.13558	0.80853	0.5162	0.95614	-0.5252	-0.6898	0.087794	0.7751	0.49032	0.99998	-0.02182	-0.023664	0.83595	0.98956	0.98112	0.99996	-1.0312	-1.2343	0.038483	0.57818	0.21708	0.58714	-0.22347	-0.2217	0.49845	0.94614	0.82455	0.94235
A630001G21Rik	4	0.16964	-0.29392	-0.023911	0.45312	1.8235	0.23563	0.84191	0.068225	0.88163	0.28348	0.91989	0.64745	0.96823	0.35763	0.9542	-0.18897	-0.76115	0.54613	0.96474	0.44657	0.99998	0.10495	0.34228	0.86655	0.99357	0.73214	0.99996	0.097259	0.39078	0.99034	0.99923	0.69596	0.88875	0.12117	0.39419	0.97057	0.99817	0.69344	0.89032
AA467197	4	0.319496	0.03819	0.18179	0.032336	0.077009	0.8817	0.99131	0.93862	0.9919	-0.28716	-0.66158	0.26399	0.89851	0.50824	0.95614	0.37995	0.91997	0.081135	0.76779	0.35759	0.99998	0.34176	0.79971	0.36602	0.90873	0.42388	0.99996	0.71285	1.7147	0.098521	0.725	0.0864	0.45195	0.53106	1.2386	0.316	0.89588	0.21551	0.60217
AA986860	4	0.362225	-0.425392	-0.3653	0.37264	1.2862	0.35641	0.89392	0.19837	0.89431	0.010415	0.03278	0.75034	0.98142	0.97385	0.99579	-0.0083616	-0.028967	0.90814	0.99294	0.97689	0.99998	0.41703	1.3183	0.25113	0.87033	0.18739	0.99996	-0.26044	-0.89407	0.4375	0.9302	0.37128	0.70544	0.10486	0.33121	0.99985	0.99995	0.74049	0.91125
Aaas	4	-0.534866	-0.07678	-0.25956	-0.46714	-1.4685	0.12399	0.76326	0.14198	0.88381	0.067726	0.20903	0.87352	0.98925	0.83442	0.98896	0.16973	0.57244	0.39103	0.92428	0.56702	0.99998	0.24651	0.80328	0.54578	0.94993	0.42181	0.99996	-0.56118	-1.7731	0.17594	0.8272	0.076219	0.43648	-0.30162	-0.93378	0.4106	0.92288	0.35042	0.71142
Aadac	4	0.00706	0.323229	0.1193	0.36111	0.96025	0.37583	0.89985	0.33693	0.91192	0.35405	0.94772	0.50877	0.9611	0.34327	0.95356	-0.034951	-0.093005	0.99451	0.9998	0.9259	0.99998	-0.35818	-0.96147	0.26801	0.876	0.33632	0.99996	-1.2228	-3.2237	0.020945	0.49522	0.0012652	0.063591	-1.3421	-3.5871	0.020335	0.52562	0.00033441	0.029367
Aagab	4	0.45095	-0.317743	0.08244	0.30544	0.85951	0.48457	0.92778	0.39006	0.9183	-0.14551	-0.44622	0.45803	0.9473	0.65544	0.96604	-0.25836	-0.73167	0.39073	0.92428	0.46437	0.99998	0.059383	0.18557	0.97306	0.99729	0.85278	0.99996	-0.32466	-0.90543	0.36445	0.90554	0.36524	0.70203	-0.4071	-1.2546	0.30995	0.89492	0.20964	0.59692
Aak1	4	0.1895	0.03182	0.09539	0.29563	0.91948	0.50501	0.93189	0.35785	0.91246	0.10613	0.32761	0.95659	0.99429	0.74321	0.98236	0.17079	0.53164	0.38874	0.92333	0.59498	0.99998	0.13897	0.43302	0.78623	0.98535	0.665	0.99996	0.60059	1.8687	0.18499	0.82912	0.061658	0.411	0.5052	1.5708	0.34772	0.90896	0.11623	0.49072
Aamdc	4	-1.21805	0.044854	0.124146	-0.55791	-1.6605	0.081796	0.70416	0.096821	0.88163	0.66014	1.615	0.11469	0.7756	0.10632	0.95279	-0.057586	-0.17674	0.93203	0.99533	0.85971	0.99998	-0.10244	-0.25375	0.6595	0.9658	0.79969	0.99996	0.17795	0.54018	0.82878	0.99047	0.58907	0.83773	0.053804	0.13116	0.91058	0.99244	0.89565	0.96449
Aamp	4	-0.101881	0.10393	0.1816	-0.1287	-0.17245	0.52905	0.94019	0.86308	0.98175	-0.026819	-0.044403	0.67424	0.97002	0.96458	0.99521	-0.51586	-0.73618	0.092624	0.78744	0.46162	0.99998	-0.61979	-1.0945	0.088303	0.73537	0.27374	0.99996	-1.1685	-1.4718	0.025113	0.51527	0.14108	0.51345	-1.3501	-2.074	0.020029	0.52381	0.038084	0.368
Aar2	4	0.2615	-0.37385	-0.54287	0.36867	1.1917	0.36287	0.89484	0.23338	0.89431	0.10717	0.28461	0.95933	0.99525	0.77594	0.98423	-0.48515	-1.5679	0.11092	0.80068	0.1169	0.99998	-0.1113	-0.3004	0.64323	0.96278	0.76387	0.99996	-0.32419	-1.0413	0.3648	0.90554	0.29774	0.65141	0.21868	0.58626	0.80052	0.98207	0.5577	0.82922
Aars	4	0.59095	1.83955	0.75315	0.16	0.26667	0.80992	0.98085	0.78972	0.9748	-0.43095	-0.74483	0.13629	0.80856	0.45638	0.95614	-0.26655	-0.44435	0.37456	0.91813	0.65679	0.99998	-2.1061	-3.648	0.00015251	0.039474	0.00026425	0.10192	1.0661	1.7923	0.0072696	0.35349	0.073091	0.4326	0.31295	0.54715	0.64059	0.96839	0.58428	0.84015
Aars2	4	0.193608	-0.329471	0.07791	0.20194	0.37459	0.71211	0.96877	0.70797	0.96331	0.0083323	0.014252	0.74628	0.98142	0.98863	0.99802	-0.057371	-0.10837	0.93274	0.99539	0.91371	0.99998	0.2721	0.48048	0.49286	0.93879	0.63088	0.99996	0.82433	1.5578	0.048955	0.62801	0.11929	0.4904	0.74642	1.3079	0.11636	0.76512	0.1909	0.57691
Aarsd1	4	0.60432	-0.190342	-0.497458	0.25459	0.76022	0.59677	0.95293	0.44713	0.93352	-0.34973	-1.3283	0.20177	0.86609	0.18407	0.95279	0.028958	0.087961	0.78842	0.982	0.92991	0.99998	0.2193	0.86957	0.60261	0.95815	0.38453	0.99996	-0.54824	-1.6087	0.18321	0.82912	0.10768	0.47484	-0.050782	-0.19724	0.73992	0.97483	0.84364	0.94885
Aasdh	4	-0.95373	-0.23581	-0.14742	-0.42648	-1.1752	0.14976	0.78279	0.23993	0.89431	0.52725	1.2422	0.24056	0.89384	0.21415	0.95279	-0.48949	-1.3492	0.10793	0.8	0.17726	0.99998	-0.25368	-0.59932	0.39912	0.92319	0.54896	0.99996	0.13383	0.36909	0.91734	0.99678	0.71206	0.89455	0.28125	0.66401	0.69437	0.97169	0.50668	0.80217
Aasdhppt	4	-0.571085	-0.67474	0.20105	0.051935	0.086132	0.92837	0.99695	0.93136	0.99143	0.62302	0.77892	0.1426	0.81415	0.43603	0.95614	-0.31948	-0.53675	0.28158	0.8916	0.59144	0.99998	0.35526	0.45126	0.3437	0.90873	0.6518	0.99996	0.37448	0.62735	0.4805	0.94653	0.53043	0.80578	0.17343	0.21762	0.88043	0.99193	0.82772	0.94384
Aass	4	-0.416113	0.52875	0.036348	-0.045893	-0.1731	0.69549	0.96721	0.86258	0.98175	0.37022	1.2158	0.47893	0.95451	0.22406	0.95279	0.23414	0.88587	0.25947	0.87894	0.37569	0.99998	-0.29461	-0.97386	0.3432	0.90873	0.33013	0.99996	0.096992	0.36578	0.99075	0.99938	0.71453	0.89542	0.060644	0.19967	0.92146	0.99337	0.84174	0.94859
Aatf	4	-0.00031	-0.206728	0.03468	0.15228	0.17066	0.82848	0.98365	0.86449	0.98175	0.15259	0.14779	0.93813	0.99251	0.8825	0.99049	-0.17376	-0.20407	0.58574	0.96717	0.8383	0.99998	0.032968	0.034193	0.96426	0.997	0.97272	0.99996	0.98694	1.1744	0.014132	0.41931	0.24024	0.60768	0.95226	0.98646	0.031823	0.58133	0.32391	0.69218
Aatk	4	-0.519553	0.260295	0.26186	0.052287	0.14171	0.92919	0.99695	0.88731	0.98449	0.57184	1.5066	0.18921	0.85055	0.13192	0.95279	-0.055485	-0.15059	0.9393	0.9959	0.8803	0.99998	-0.31578	-0.8339	0.31524	0.90184	0.40434	0.99996	0.67712	1.8387	0.12175	0.76714	0.065957	0.42034	0.41526	1.0966	0.47232	0.94038	0.27282	0.65736
AB124611	4	-0.65759	-0.270729	-0.144976	-0.12567	-0.4961	0.53414	0.94064	0.61982	0.9502	0.53192	1.7962	0.2342	0.88938	0.072462	0.95279	-0.077599	-0.31337	0.86813	0.98838	0.754	0.99998	0.19313	0.6586	0.66235	0.96583	0.51015	0.99996	0.089894	0.35839	0.99649	0.99964	0.72005	0.89697	0.23487	0.79501	0.77332	0.97757	0.4266	0.75963
Abat	4	0.23609	0.73008	-0.01044	0.43081	1.3267	0.26547	0.85846	0.18459	0.89431	0.19472	0.55806	0.84114	0.98771	0.57681	0.9581	0.16714	0.51759	0.39723	0.92428	0.60475	0.99998	-0.56294	-1.6297	0.11387	0.77293	0.10316	0.99996	0.32335	0.99613	0.56296	0.9605	0.31918	0.66646	0.33379	0.96602	0.60566	0.96081	0.33404	0.69885
Abca1	4	-0.248581	-0.1012	-0.07689	-0.077201	-0.27983	0.63083	0.95823	0.77961	0.97394	0.17138	0.50648	0.89416	0.99087	0.61252	0.96267	-0.40538	-1.4722	0.1765	0.8362	0.14098	0.99998	-0.30418	-0.90755	0.33059	0.90522	0.36412	0.99996	0.3385	1.23	0.53734	0.95544	0.2187	0.58859	0.41539	1.2377	0.47217	0.94027	0.21583	0.60221
Abca13	4	0.71162	-0.016556	0.176314	0.52448	1.3341	0.155	0.78594	0.18219	0.89313	-0.18714	-0.49443	0.39154	0.93233	0.621	0.96399	-0.081346	-0.21003	0.85664	0.98764	0.83364	0.99998	-0.06479	-0.17819	0.73957	0.97855	0.85857	0.99996	0.065514	0.16525	0.95191	0.99814	0.86874	0.95716	-0.1108	-0.29763	0.6477	0.96839	0.76599	0.92011
Abca2	4	-0.33911	-0.11665	-0.6575	0.19178	0.34104	0.73702	0.97302	0.73308	0.96742	0.53089	0.50294	0.23547	0.89066	0.61501	0.96294	0.51218	0.94505	0.02125	0.5582	0.34463	0.99998	0.62883	0.61439	0.068273	0.69437	0.53896	0.99996	0.19598	0.35057	0.79594	0.98952	0.72591	0.89887	0.85348	0.82217	0.06202	0.66996	0.41098	0.74951
Abca3	4	-0.25226	-0.16082	-0.47574	-0.13348	-0.40024	0.51985	0.9369	0.68898	0.95978	0.11878	0.25418	0.98622	0.99923	0.79935	0.98631	0.05919	0.17867	0.69966	0.97931	0.8582	0.99998	0.22001	0.47492	0.60104	0.95815	0.63484	0.99996	0.54496	1.6425	0.2431	0.86554	0.10049	0.46531	1.0207	2.2031	0.019165	0.51989	0.02759	0.32995
Abca5	4	-0.621778	-0.219355	0.331559	-0.034428	-0.080372	0.7202	0.96968	0.93594	0.99143	0.58735	1.5348	0.17371	0.83525	0.12482	0.95279	0.089585	0.22052	0.608	0.97167	0.82546	0.99998	0.30894	0.82741	0.42281	0.92824	0.408	0.99996	-0.075891	-0.17858	0.70357	0.97806	0.85827	0.95372	-0.40745	-1.0474	0.30959	0.89492	0.2949	0.67356
Abca6	4	-0.133356	-0.0792936	-0.1552	-0.056353	-0.18343	0.67246	0.96219	0.85446	0.98175	0.077003	0.26053	0.89411	0.99087	0.79445	0.98631	0.0066964	0.022226	0.85908	0.98773	0.98227	0.99998	0.08599	0.29569	0.90977	0.99511	0.76747	0.99996	-0.86692	-2.7886	0.068121	0.68507	0.0052944	0.16217	-0.71172	-2.4023	0.1335	0.79495	0.016291	0.28284
Abca7	4	0.56155	-0.06998	-0.66975	0.36597	0.87789	0.3678	0.89567	0.38	0.91403	-0.19558	-0.38472	0.37868	0.92917	0.70044	0.97598	0.24117	0.58283	0.24661	0.87408	0.56001	0.99998	0.31115	0.62691	0.41889	0.92752	0.53072	0.99996	0.2613	0.62691	0.6745	0.97351	0.53072	0.80584	0.93105	1.8708	0.037161	0.60049	0.061372	0.41192
Abca8a	4	0.12349	0.488449	0.06969	-0.2302	-0.7218	0.36084	0.89484	0.47042	0.93596	-0.35369	-1.0695	0.19684	0.86083	0.28485	0.95279	0.036439	0.11797	0.7657	0.982	0.90609	0.99998	-0.45201	-1.4084	0.18433	0.82846	0.15901	0.99996	0.45284	1.4529	0.3584	0.90369	0.14624	0.51839	0.38315	1.1911	0.52448	0.94979	0.23363	0.6173
Abca8b	4	-0.362366	0.305036	-0.36968	-0.29564	-0.9112	0.27177	0.86008	0.36219	0.91246	0.066726	0.16725	0.87123	0.98925	0.86717	0.99008	0.028086	0.088163	0.79106	0.982	0.92975	0.99998	-0.27695	-0.7139	0.36617	0.90873	0.47529	0.99996	0.14739	0.45849	0.89096	0.99597	0.6466	0.86805	0.51707	1.3291	0.33303	0.90363	0.18382	0.56925
Abca9	4	-0.25683	-0.455688	-0.35296	0.10836	0.3879	0.93549	0.99703	0.69809	0.96188	0.36519	0.96217	0.48788	0.956	0.33597	0.95279	0.0082419	0.029659	0.85369	0.98764	0.97634	0.99998	0.46393	1.2303	0.19364	0.83116	0.21859	0.99996	-0.15168	-0.54202	0.5869	0.96421	0.5878	0.83684	0.20128	0.53179	0.83173	0.98632	0.59487	0.84508
Abcb10	4	0.25857	-0.83621	0.432766	-0.21099	-0.78837	0.38996	0.90475	0.43048	0.92906	-0.46956	-1.3027	0.11214	0.77175	0.19269	0.95279	-0.11024	-0.41683	0.76763	0.982	0.6768	0.99998	0.72597	2.0521	0.031874	0.57451	0.040161	0.96695	0.48233	1.8203	0.31661	0.89053	0.068708	0.42639	0.049564	0.13908	0.90311	0.99213	0.88939	0.96265
Abcb11	4	-0.162813	-0.29998	-0.31716	-0.23007	-0.81219	0.36094	0.89484	0.41668	0.92633	-0.067257	-0.18929	0.59489	0.96624	0.84986	0.98918	-0.15351	-0.56036	0.6414	0.97461	0.57524	0.99998	0.14647	0.42266	0.76763	0.98071	0.67255	0.99996	0.40057	1.4517	0.43526	0.92843	0.14658	0.51868	0.71773	2.0628	0.13578	0.79561	0.039134	0.37147
Abcb1a	4	-0.326955	-0.313055	-0.12609	0.079155	0.27267	0.99156	0.99841	0.78511	0.9748	0.40611	1.0615	0.41604	0.93813	0.28846	0.95279	-0.00097509	-0.0034003	0.88323	0.98999	0.99729	0.99998	0.31208	0.82045	0.41726	0.92752	0.41196	0.99996	-1.0449	-3.5487	0.036958	0.57109	0.00038718	0.029751	-0.91881	-2.3946	0.071171	0.68676	0.016637	0.28454
Abcb1b	4	-0.27898	-0.1971	0.33268	0.18205	0.47756	0.75924	0.97512	0.63296	0.95305	0.46103	1.182	0.32932	0.91896	0.2372	0.95279	0.32999	0.88415	0.12679	0.80952	0.37661	0.99998	0.52709	1.3724	0.13202	0.78816	0.16995	0.99996	0.57269	1.52	0.21488	0.85551	0.1285	0.50111	0.24001	0.61779	0.76488	0.97757	0.53672	0.8171
Abcb4	4	-0.48398	-0.68308	-0.56181	-0.21129	-0.81129	0.38925	0.90475	0.4172	0.92663	0.27269	0.8129	0.67195	0.97002	0.41628	0.95614	-0.56014	-2.1616	0.071832	0.7548	0.03065	0.99998	0.12294	0.37465	0.82467	0.98951	0.70792	0.99996	-1.328	-5.0349	0.014793	0.42878	4.7822e-07	0.0002514	-0.76619	-2.2452	0.1127	0.76257	0.024755	0.32171
Abcb6	4	-0.56472	-0.262658	-0.18696	-0.10705	-0.32878	0.57023	0.95017	0.74232	0.96894	0.45767	1.1149	0.3341	0.92085	0.26488	0.95279	-0.31684	-0.99333	0.28555	0.8927	0.32055	0.99998	-0.054182	-0.13448	0.76295	0.98051	0.89302	0.99996	-0.5685	-1.732	0.17223	0.82373	0.083276	0.44806	-0.38154	-0.91916	0.33171	0.90324	0.35801	0.71462
Abcb7	4	1.17034	0.08846	-0.02455	0.36214	0.54064	0.37405	0.89907	0.58876	0.94564	-0.8082	-1.0468	0.018555	0.51336	0.29519	0.95279	-0.1418	-0.21245	0.67546	0.97931	0.83176	0.99998	-0.23026	-0.30505	0.43521	0.93389	0.76032	0.99996	-0.84156	-1.2392	0.073509	0.69655	0.21527	0.58587	-0.81701	-1.0659	0.095826	0.73289	0.28649	0.66731
Abcb9	4	0.06278	-0.16064	-0.10179	0.17817	0.55486	0.76834	0.97563	0.57899	0.9452	0.11539	0.32859	0.9787	0.99855	0.74247	0.98236	-0.64061	-2.0155	0.043923	0.67185	0.043852	0.99998	-0.47997	-1.3797	0.16313	0.81385	0.16769	0.99996	-0.38701	-1.1888	0.30227	0.88935	0.23453	0.60189	-0.28522	-0.81306	0.42631	0.9264	0.41619	0.75279
Abcc1	4	-0.076135	-0.205878	-0.09138	-0.11417	-0.391	0.55645	0.94575	0.6958	0.96124	-0.038035	-0.12435	0.65203	0.96837	0.90104	0.99163	-0.0027885	-0.0098211	0.88933	0.99078	0.99216	0.99998	0.20309	0.6878	0.64074	0.96278	0.49158	0.99996	-0.58409	-1.9826	0.16446	0.81733	0.047407	0.38654	-0.49271	-1.6116	0.24681	0.8665	0.10705	0.47705
Abcc10	4	-0.33267	-0.375521	-0.03333	0.67673	1.7519	0.053937	0.64379	0.079785	0.88163	1.0094	1.9716	0.008388	0.375	0.04865	0.95279	0.062969	0.16341	0.68832	0.97931	0.8702	0.99998	0.43849	0.85867	0.22297	0.85623	0.39052	0.99996	0.15782	0.40674	0.87022	0.99518	0.6842	0.88449	0.19115	0.37346	0.84942	0.99092	0.70881	0.89692
Abcc2	4	0.02168	0.183799	0.07032	0.31044	1.0368	0.47334	0.92308	0.29984	0.90187	0.28876	1.0157	0.63647	0.96624	0.30975	0.95279	-0.00050105	-0.0016831	0.8816	0.98999	0.99866	0.99998	-0.1843	-0.6529	0.51014	0.94289	0.51382	0.99996	0.42466	1.4217	0.39906	0.918	0.1551	0.5285	0.35434	1.2526	0.5714	0.95773	0.21035	0.59754
Abcc3	4	0.098946	-0.41138	0.400148	0.061767	0.1991	0.95145	0.99703	0.84218	0.98118	-0.037179	-0.11955	0.65401	0.96941	0.90484	0.99196	-0.26364	-0.85303	0.38	0.92011	0.39364	0.99998	0.14774	0.48583	0.76509	0.98051	0.62709	0.99996	0.32271	1.0429	0.56413	0.96096	0.29697	0.65111	-0.077438	-0.2511	0.69788	0.97169	0.80174	0.93325
Abcc4	4	-0.37149	-0.23387	0.22949	0.15266	0.4853	0.82767	0.98357	0.62746	0.95213	0.52415	1.3717	0.24432	0.89487	0.17017	0.95279	-0.34255	-1.0943	0.24798	0.87455	0.27384	0.99998	-0.10868	-0.28608	0.64745	0.96295	0.77482	0.99996	0.7187	2.3013	0.094606	0.71906	0.021373	0.30818	0.48921	1.2854	0.36755	0.91123	0.19867	0.58582
Abcc5	4	0.246144	-0.011479	0.74608	0.075504	0.19403	0.98338	0.99774	0.84615	0.98162	-0.17064	-0.52898	0.41787	0.93813	0.59682	0.9602	0.026546	0.068571	0.79564	0.982	0.94533	0.99998	0.038025	0.11881	0.97641	0.99778	0.90543	0.99996	0.14812	0.38106	0.88918	0.99596	0.70316	0.89104	-0.59796	-1.8579	0.18545	0.83658	0.063186	0.41584
Abcd2	4	0.77763	0.61232	-0.04801	0.41517	1.588	0.28972	0.86983	0.11228	0.88163	-0.36246	-1.2938	0.1884	0.85055	0.19572	0.95279	0.13322	0.50913	0.48564	0.9535	0.61066	0.99998	-0.4791	-1.7358	0.164	0.81513	0.082601	0.99996	0.24943	0.95282	0.6962	0.97689	0.34068	0.6823	0.29744	1.0764	0.66555	0.96928	0.28173	0.66402
Abcd3	4	-0.06202	-0.45001	0.29187	0.29185	0.99606	0.51411	0.93474	0.31922	0.9094	0.35387	1.1071	0.50907	0.9611	0.26826	0.95279	-0.12056	-0.41183	0.73728	0.98033	0.68047	0.99998	0.32945	1.0392	0.38636	0.91943	0.29872	0.99996	-0.27001	-0.91847	0.42652	0.92396	0.35837	0.69543	-0.56188	-1.753	0.20431	0.84426	0.079606	0.43838
Abcd4	4	-0.16815	0.0987	3.6603	0.43769	0.36633	0.25494	0.85423	0.71412	0.96395	0.60584	0.53812	0.15622	0.81729	0.59049	0.95981	1.3645	1.1691	0	0	0.24235	0.99998	1.2658	1.2501	0	0	0.21125	0.99996	1.3234	1.1222	0.00061004	0.11607	0.26178	0.62291	-2.3369	-2.1425	0.0014743	0.19728	0.032157	0.34698
Abce1	4	-0.04325	0.26261	0.399874	0.52335	1.1635	0.15622	0.78599	0.24464	0.89431	0.5666	1.0981	0.19521	0.86031	0.27217	0.95279	-0.1054	-0.23672	0.78262	0.982	0.81288	0.99998	-0.36801	-0.72668	0.2585	0.87476	0.46742	0.99996	0.070614	0.15573	0.96126	0.99868	0.87625	0.96004	-0.32926	-0.62568	0.38026	0.91635	0.53153	0.81414
Abcf1	4	-0.479	0.273495	0.273201	-0.60428	-1.0577	0.064664	0.6723	0.2902	0.89746	-0.12528	-0.25049	0.49179	0.95745	0.80221	0.98631	0.037115	0.065318	0.76392	0.98197	0.94792	0.99998	-0.23638	-0.48213	0.42474	0.9288	0.62971	0.99996	0.018501	0.03243	0.86971	0.99517	0.97413	0.99183	-0.2547	-0.51322	0.45981	0.93566	0.6078	0.8496
Abcf2	4	-0.578661	0.12669	0.152728	-0.055091	-0.16556	0.67541	0.96283	0.8685	0.98187	0.52357	1.4546	0.24483	0.89487	0.14578	0.95279	0.23415	0.71449	0.25947	0.87894	0.47493	0.99998	0.10746	0.30198	0.8602	0.99357	0.76267	0.99996	-0.061982	-0.1867	0.72813	0.98351	0.85189	0.95144	-0.21471	-0.59383	0.5074	0.94671	0.55263	0.82646
Abcf3	4	0.57608	0.797526	0.12957	0.32298	0.67898	0.44614	0.91967	0.49715	0.93633	-0.2531	-0.41568	0.30375	0.91431	0.67765	0.97215	0.042776	0.090901	0.7475	0.98081	0.92757	0.99998	-0.75475	-1.2596	0.046261	0.63706	0.20783	0.99996	0.85635	1.8197	0.038737	0.57859	0.068798	0.42639	0.72678	1.225	0.12963	0.78923	0.22057	0.60623
Abcg1	4	-0.673311	0.339549	-0.356948	-0.013091	-0.048027	0.77037	0.97563	0.96169	0.99481	0.66022	1.5331	0.11453	0.7756	0.12526	0.95279	0.38292	1.4069	0.079508	0.76733	0.15947	0.99998	0.043371	0.10184	0.98816	0.99821	0.91888	0.99996	0.045712	0.1675	0.91709	0.99678	0.86698	0.95642	0.40266	0.9381	0.49164	0.94513	0.34819	0.71046
Abcg2	4	-0.7229	0.20748	0.168915	-0.22237	-0.84088	0.37146	0.89714	0.40041	0.92296	0.50053	1.3118	0.27258	0.90003	0.1896	0.95279	0.20461	0.77347	0.31793	0.90743	0.43925	0.99998	-0.0028698	-0.0075358	0.88089	0.99482	0.99399	0.99996	0.036685	0.13857	0.90107	0.99608	0.88979	0.96478	-0.13223	-0.34689	0.61532	0.96338	0.72867	0.90502
Abcg4	4	0.058242	-0.09227	0.069999	0.14656	0.52957	0.8418	0.98671	0.59641	0.94643	0.088318	0.24115	0.91948	0.99251	0.80944	0.98772	0.38285	1.3947	0.079508	0.76733	0.16311	0.99998	0.47512	1.3173	0.18189	0.82727	0.18775	0.99996	0.056861	0.20541	0.93574	0.99778	0.83725	0.94689	-0.013138	-0.036078	0.79935	0.98207	0.97122	0.98957
Abhd10	4	-0.92143	-0.08769	-0.23292	-0.69903	-2.5637	0.037975	0.57907	0.010357	0.65932	0.2224	0.64324	0.77851	0.98142	0.52007	0.95614	0.23402	0.85953	0.25972	0.87903	0.39005	0.99998	0.32171	0.93831	0.40074	0.92319	0.34809	0.99996	-0.89982	-3.2897	0.060698	0.66889	0.0010028	0.056358	-0.6669	-1.9262	0.15231	0.8095	0.054085	0.40048
Abhd11	4	-0.32424	-0.20828	-0.177729	-0.49359	-1.5685	0.10904	0.74481	0.11675	0.88163	-0.16935	-0.46747	0.4193	0.93813	0.64016	0.96572	0.21048	0.67379	0.30553	0.90129	0.50044	0.99998	0.41876	1.1773	0.24864	0.86719	0.23907	0.99996	-0.18618	-0.59254	0.53703	0.95533	0.55349	0.81956	-0.0084513	-0.023548	0.80601	0.98247	0.98121	0.99409
Abhd12	4	0.197033	0.12096	-0.11034	-0.048537	-0.16659	0.69	0.96586	0.86769	0.98178	-0.24557	-0.6788	0.3128	0.9155	0.49727	0.95614	-0.18413	-0.63189	0.55788	0.96474	0.52746	0.99998	-0.30509	-0.84677	0.32937	0.90522	0.39712	0.99996	0.61522	2.1122	0.17132	0.82175	0.034668	0.35851	0.72556	2.0142	0.13045	0.79076	0.043984	0.38445
Abhd13	4	-0.438522	-0.0126	-0.24211	-0.41397	-1.4072	0.15871	0.78878	0.15938	0.88954	0.024552	0.068594	0.78176	0.98142	0.94531	0.99372	0.20783	0.71068	0.31137	0.90529	0.47728	0.99998	0.22043	0.62013	0.59997	0.95815	0.53517	0.99996	0.43459	1.4836	0.38305	0.91035	0.13793	0.51105	0.6767	1.9022	0.16639	0.82322	0.057148	0.40408
Abhd14a	4	0.01309	-0.286673	-0.47528	0.42206	1.5239	0.27818	0.86486	0.12753	0.88163	0.40897	1.2425	0.41116	0.93813	0.21406	0.95279	-0.30239	-1.0939	0.30812	0.90288	0.27401	0.99998	-0.015717	-0.048067	0.84978	0.99211	0.96166	0.99996	-0.14111	-0.50734	0.60373	0.96721	0.61192	0.8499	0.33417	1.0189	0.605	0.96072	0.30823	0.68148
Abhd14b	4	-0.293444	0.234751	-0.63528	-0.20416	-0.82339	0.40074	0.9063	0.41029	0.92532	0.089284	0.24634	0.92156	0.99251	0.80542	0.98682	0.036031	0.14785	0.76737	0.982	0.88246	0.99998	-0.19872	-0.55922	0.48635	0.93879	0.57601	0.99996	-0.28162	-1.1367	0.4133	0.92393	0.25567	0.6188	0.35366	0.98997	0.57252	0.95773	0.32219	0.69121
Abhd15	4	0.220491	-0.80779	0.321835	0.30593	1.1946	0.48355	0.92755	0.23224	0.89431	0.085439	0.24537	0.91322	0.99227	0.80617	0.98719	-0.26478	-1.0338	0.37771	0.91978	0.30122	0.99998	0.54301	1.5684	0.11962	0.77607	0.11679	0.99996	0.39443	1.5403	0.44553	0.93446	0.1235	0.4961	0.072595	0.20918	0.94311	0.9964	0.83431	0.94646
Abhd16a	4	-0.008445	-0.426262	-0.65374	-0.056073	-0.20453	0.67302	0.96221	0.83794	0.98118	-0.047628	-0.15639	0.63311	0.96624	0.87573	0.99049	0.073588	0.27394	0.65635	0.97701	0.78413	0.99998	0.49985	1.6774	0.15713	0.809	0.093465	0.99996	-0.62322	-2.2505	0.14524	0.79716	0.024417	0.32365	0.03052	0.10117	0.87281	0.99106	0.91942	0.97227
Abhd17a	4	-0.111244	0.04377	0.173403	-0.1756	-0.7775	0.44558	0.91967	0.43686	0.92906	-0.064356	-0.3032	0.60053	0.96624	0.76174	0.98242	-0.12178	-0.54021	0.73336	0.98011	0.58905	0.99998	-0.16555	-0.784	0.54446	0.94993	0.43304	0.99996	0.1468	0.65043	0.89187	0.99608	0.51542	0.79695	-0.026603	-0.12578	0.7784	0.9781	0.89991	0.96608
Abhd17b	4	0.2932	0.063855	0.30731	-0.19619	-0.60058	0.41376	0.91151	0.54812	0.94153	-0.48939	-1.7506	0.10218	0.75422	0.080021	0.95279	-0.083805	-0.258	0.84952	0.98722	0.79641	0.99998	-0.14766	-0.53458	0.57603	0.95274	0.59294	0.99996	0.61484	1.8923	0.17162	0.82201	0.05845	0.40743	0.30753	1.1115	0.64913	0.96839	0.26635	0.65012
Abhd17c	4	-0.55169	-0.135411	0.69999	-0.1558	-0.33943	0.47827	0.92481	0.73428	0.96742	0.39589	0.87813	0.43592	0.94508	0.37988	0.95614	-0.083182	-0.18263	0.85141	0.98722	0.85509	0.99998	0.052229	0.11713	0.98978	0.99821	0.90676	0.99996	0.9431	2.0739	0.020792	0.49522	0.038088	0.36559	0.24311	0.54171	0.75883	0.9768	0.58802	0.84239
Abhd18	4	0.37536	-0.346856	0.08712	0.13456	0.61241	0.87118	0.9905	0.54026	0.93946	-0.2408	-1.07	0.31839	0.91792	0.28463	0.95279	-0.00050598	-0.0023227	0.8816	0.98999	0.99815	0.99998	0.34635	1.5694	0.35865	0.90873	0.11655	0.99996	-0.2846	-1.2902	0.40944	0.92393	0.19696	0.57162	-0.37172	-1.6617	0.3403	0.90809	0.096575	0.46121
Abhd2	4	0.46593	-0.57075	0.24163	0.70518	1.9849	0.043668	0.60181	0.047151	0.88163	0.23925	0.93243	0.74373	0.98142	0.35111	0.9542	-0.24875	-0.70143	0.40923	0.92778	0.48304	0.99998	0.322	1.2914	0.40023	0.92319	0.19658	0.99996	-0.39599	-1.0932	0.29363	0.8854	0.27431	0.63214	-0.63762	-2.4461	0.16552	0.82194	0.014441	0.26749
Abhd3	4	-0.05367	-0.00839	-0.18488	0.60589	1.2766	0.090184	0.71804	0.20174	0.89431	0.65956	1.3801	0.11514	0.77702	0.16754	0.95279	0.38413	0.81485	0.078745	0.76733	0.41516	0.99998	0.39252	0.83327	0.28768	0.88838	0.40469	0.99996	0.59756	1.261	0.18748	0.83034	0.2073	0.57889	0.78244	1.6527	0.095572	0.73287	0.098399	0.46462
Abhd4	4	0.164194	-0.150868	-0.21539	0.26234	0.91704	0.58004	0.95114	0.35912	0.91246	0.098146	0.36632	0.939	0.99251	0.71413	0.97813	-0.12404	-0.43529	0.72696	0.97931	0.66335	0.99998	0.026828	0.10069	0.95028	0.99656	0.9198	0.99996	-0.45556	-1.5828	0.24366	0.86554	0.11347	0.48199	-0.24017	-0.89855	0.47669	0.94082	0.36889	0.72301
Abhd5	4	-0.78328	0.77475	-0.30101	-0.19014	-0.63377	0.42281	0.9128	0.52623	0.9382	0.59314	1.3858	0.16847	0.83375	0.16582	0.95279	-0.02092	-0.070533	0.94937	0.99744	0.94377	0.99998	-0.79567	-1.8601	0.039347	0.61685	0.062865	0.99996	0.19593	0.65682	0.79599	0.98952	0.5113	0.79405	0.49694	1.1635	0.35829	0.91111	0.24464	0.62849
Abhd6	4	-0.337103	0.050189	-0.02185	0.060827	0.13667	0.94901	0.99703	0.8913	0.98481	0.39793	0.67944	0.4319	0.94345	0.49686	0.95614	-0.017494	-0.040688	0.93808	0.9959	0.96754	0.99998	-0.067683	-0.11815	0.73367	0.97805	0.90595	0.99996	0.65289	1.5076	0.13833	0.78921	0.13166	0.50427	0.67474	1.1728	0.16791	0.82322	0.24089	0.6249
Abhd8	4	-0.32846	0.231316	-0.30441	0.1031	0.35036	0.94871	0.99703	0.72607	0.96598	0.43156	1.0226	0.37502	0.92863	0.30651	0.95279	-0.069914	-0.23913	0.89309	0.99187	0.81101	0.99998	-0.30123	-0.71874	0.3345	0.90697	0.4723	0.99996	0.5452	1.8623	0.24284	0.86554	0.062561	0.41346	0.84961	2.0308	0.063647	0.67167	0.042279	0.37992
Abi1	4	1.20775	-0.73474	-0.40676	0.14335	0.59491	0.84983	0.98765	0.55191	0.94239	-1.0644	-3.3696	0.0029485	0.21168	0.0007527	0.29679	-0.43039	-1.7906	0.152	0.83034	0.073358	0.99998	0.30435	0.98414	0.43048	0.93138	0.32505	0.99996	0.18153	0.75431	0.82228	0.99003	0.45067	0.75997	0.58829	1.8984	0.249	0.86675	0.057639	0.40479
Abi3	4	-0.52905	-0.7418	-0.07828	-0.13177	-0.40144	0.52331	0.93781	0.68809	0.95978	0.39728	1.1241	0.43312	0.94345	0.26098	0.95279	-0.23605	-0.73036	0.43679	0.93902	0.46517	0.99998	0.50575	1.4697	0.15063	0.80178	0.14163	0.99996	0.16696	0.51256	0.8509	0.99286	0.60826	0.84835	0.24524	0.69793	0.75512	0.97571	0.48522	0.78942
Abitram	4	0.163624	0.14937	-0.39695	0.09741	0.27078	0.96325	0.99703	0.78656	0.9748	-0.066214	-0.1749	0.59672	0.96624	0.86116	0.98971	-0.64847	-1.8248	0.041991	0.66774	0.068031	0.99998	-0.79784	-2.1509	0.038788	0.61415	0.031481	0.9571	-0.83625	-2.2351	0.074983	0.69981	0.02541	0.32783	-0.4393	-1.1623	0.28331	0.8818	0.2451	0.62885
Abl1	4	0.08446	0.109136	0.78	0.55082	1.5838	0.1308	0.76783	0.11325	0.88163	0.46636	1.5705	0.32113	0.9181	0.11629	0.95279	-0.017804	-0.051575	0.93915	0.9959	0.95887	0.99998	-0.12694	-0.43495	0.61486	0.95965	0.6636	0.99996	0.49386	1.4233	0.30217	0.88935	0.15466	0.52798	-0.28614	-0.95446	0.42514	0.92573	0.33985	0.70385
Abl2	4	-0.04201	-0.098762	0.07521	0.54831	1.5145	0.13299	0.77009	0.1299	0.8825	0.59032	1.4888	0.17122	0.83472	0.13654	0.95279	0.045438	0.12577	0.74074	0.98074	0.89991	0.99998	0.1442	0.36636	0.77302	0.98155	0.7141	0.99996	0.017822	0.048982	0.86849	0.99517	0.96093	0.9874	-0.057388	-0.14486	0.73006	0.97483	0.88482	0.96154
Ablim3	4	-0.057283	-0.42665	0.01485	-0.14304	-0.65249	0.50104	0.93034	0.51408	0.93634	-0.085757	-0.35293	0.56169	0.96574	0.72414	0.98024	-0.27508	-1.2621	0.35768	0.91451	0.20692	0.99998	0.15157	0.63404	0.75614	0.98009	0.52605	0.99996	-0.65662	-2.9801	0.12933	0.77467	0.0028812	0.11268	-0.67147	-2.7611	0.15007	0.8095	0.005761	0.16259
Abr	4	0.461436	-0.23905	-0.273	-0.045844	-0.1324	0.69559	0.96721	0.89467	0.98523	-0.50728	-1.657	0.094301	0.74899	0.097521	0.95279	-0.36848	-1.074	0.21671	0.86069	0.2828	0.99998	-0.12943	-0.42808	0.61004	0.95901	0.66859	0.99996	-1.2937	-3.6598	0.01642	0.44842	0.00025244	0.023247	-1.0207	-3.3414	0.05226	0.6425	0.00083369	0.053418
Abracl	4	-0.083627	-0.0172005	0.580274	0.087483	0.26636	0.98821	0.99774	0.78996	0.9748	0.17111	0.63195	0.89467	0.99092	0.52742	0.95614	-0.0090989	-0.027706	0.91109	0.99294	0.9779	0.99998	0.0081016	0.030023	0.90717	0.99511	0.97605	0.99996	0.55296	1.6839	0.23436	0.86291	0.092191	0.45712	-0.027314	-0.10111	0.77744	0.97794	0.91946	0.97227
Abraxas1	4	-0.50176	-0.383108	0.01982	0.33433	1.013	0.42245	0.9128	0.31107	0.90636	0.83609	1.6204	0.035382	0.62929	0.10515	0.95279	-0.027428	-0.083424	0.97082	0.99891	0.93351	0.99998	0.35568	0.69545	0.3432	0.90873	0.48678	0.99996	0.11561	0.34975	0.95374	0.99835	0.72653	0.89896	0.09579	0.18534	0.98348	0.99912	0.85296	0.95124
Abraxas2	4	-0.278879	0.184632	-0.18979	0.003451	0.010058	0.80982	0.98085	0.99197	0.99934	0.28233	0.77287	0.64959	0.96823	0.4396	0.95614	0.065392	0.1912	0.68105	0.97931	0.84837	0.99998	-0.11924	-0.33438	0.62773	0.96132	0.73809	0.99996	-0.58872	-1.7086	0.16252	0.81394	0.087522	0.45306	-0.39893	-1.0822	0.31615	0.89588	0.27917	0.66211
Abt1	4	-1.34189	1.27656	0.40693	-1.1389	-1.43	0.0033552	0.25	0.15273	0.88661	0.20299	0.33301	0.82136	0.98555	0.73913	0.98236	0.15116	0.21324	0.43821	0.93984	0.83114	0.99998	-1.1254	-1.8505	0.0086422	0.37802	0.064245	0.99996	1.1416	1.617	0.0040669	0.27211	0.10588	0.47255	0.73467	1.2667	0.12485	0.78092	0.20526	0.59129
Abtb1	4	-0.056509	0.182389	0.156037	0.068931	0.26405	0.9667	0.99703	0.79174	0.9748	0.12544	0.3934	0.99949	0.99995	0.69403	0.97491	-0.081341	-0.31208	0.85664	0.98764	0.75498	0.99998	-0.26373	-0.82997	0.38514	0.91832	0.40655	0.99996	0.14327	0.54874	0.89848	0.99608	0.58319	0.83368	-0.012767	-0.04015	0.79996	0.98207	0.96797	0.98842
Abtb2	4	0.031881	-0.45647	-0.275898	0.00953	0.033498	0.82375	0.98343	0.97328	0.99688	-0.022351	-0.050275	0.68334	0.97286	0.9599	0.99495	-0.23205	-0.82853	0.44614	0.94538	0.40737	0.99998	0.22442	0.52852	0.59184	0.95622	0.59714	0.99996	-0.32234	-1.1291	0.36643	0.90554	0.25884	0.62034	-0.046442	-0.10601	0.74694	0.97561	0.91557	0.97109
Acaa1a	4	-0.034214	-0.13421	-0.09628	0.070676	0.18103	0.97148	0.99703	0.85634	0.98175	0.10489	0.26018	0.95445	0.99392	0.79473	0.98631	0.15532	0.39973	0.42677	0.93642	0.68936	0.99998	0.28953	0.72266	0.46002	0.93566	0.46989	0.99996	0.60971	1.5672	0.17661	0.82905	0.11707	0.48667	0.70599	1.7606	0.14331	0.79847	0.078301	0.43656
Acaa1b	4	0.045088	0.8714	-0.3057	0.022265	0.055986	0.85674	0.98833	0.95535	0.99432	-0.022823	-0.048375	0.68232	0.97254	0.96142	0.99508	-1.1564	-2.9025	0.002186	0.22995	0.003702	0.99998	-2.0278	-4.0653	0.00020335	0.045977	4.798e-05	0.039667	-0.62568	-1.5245	0.14387	0.79502	0.12738	0.50061	-0.31998	-0.68284	0.39002	0.92195	0.49471	0.79574
Acaa2	4	-0.516181	-0.27448	-0.049064	-0.61031	-1.5214	0.062224	0.66433	0.12815	0.88163	-0.094129	-0.24404	0.54624	0.96468	0.8072	0.98734	-0.16772	-0.42999	0.60139	0.97053	0.66721	0.99998	0.10676	0.2869	0.86208	0.99357	0.77419	0.99996	-0.13905	-0.35088	0.60709	0.96823	0.72568	0.89875	-0.089986	-0.23621	0.6781	0.96975	0.81327	0.93803
Acaca	4	-0.558977	0.060669	-1.14255	-0.52396	-1.5579	0.095369	0.72126	0.11925	0.88163	0.035017	0.099981	0.8052	0.98477	0.92036	0.99236	0.045419	0.13976	0.74074	0.98074	0.88885	0.99998	-0.01525	-0.044574	0.85059	0.99211	0.96445	0.99996	-1.1762	-3.4675	0.024706	0.51527	0.00052525	0.036509	-0.03365	-0.096782	0.76758	0.97757	0.9229	0.9741
Acacb	4	-0.022138	-0.37769	-0.28013	0.087022	0.33862	0.98912	0.99785	0.73489	0.96767	0.10916	0.35503	0.96431	0.99674	0.72257	0.97971	0.11118	0.43771	0.54807	0.96474	0.6616	0.99998	0.48887	1.6026	0.16771	0.81794	0.10903	0.99996	-0.48204	-1.8624	0.22429	0.85787	0.062542	0.41346	-0.20191	-0.65834	0.52397	0.94979	0.51032	0.80315
Acad11	4	0.23735	-0.62848	-0.092456	0.35068	0.89685	0.39464	0.90475	0.3698	0.91292	0.11333	0.28935	0.97392	0.99849	0.77232	0.9834	0.23199	0.59559	0.26313	0.88048	0.55145	0.99998	0.86047	2.2132	0.0098622	0.39	0.026885	0.93936	-0.15176	-0.38655	0.58675	0.96421	0.69909	0.88981	-0.059304	-0.15197	0.72706	0.97483	0.87921	0.95981
Acad8	4	0.85746	-0.189638	0.28901	0.17654	0.44159	0.7721	0.97603	0.65879	0.95592	-0.68092	-2.0264	0.037415	0.6354	0.042728	0.95279	0.0086317	0.021793	0.85252	0.98729	0.98261	0.99998	0.19827	0.59885	0.65101	0.96349	0.54927	0.99996	0.0238	0.059493	0.87891	0.99535	0.95256	0.98615	-0.26521	-0.79228	0.44812	0.93206	0.4282	0.76052
Acad9	4	-0.59429	-0.591106	-0.31634	-0.76269	-1.8369	0.027248	0.54361	0.066227	0.88163	-0.1684	-0.35891	0.42103	0.93899	0.71966	0.9792	-0.51605	-1.2738	0.092471	0.78744	0.20274	0.99998	0.075056	0.16055	0.9359	0.9952	0.87245	0.99996	0.80496	1.9989	0.056937	0.65714	0.045622	0.38205	1.1213	2.3989	0.0083371	0.38732	0.016443	0.28373
Acadl	4	-0.055552	-0.0672926	-0.26186	-0.00674	-0.014968	0.78496	0.9778	0.98806	0.99876	0.048812	0.10647	0.83326	0.9877	0.91521	0.99236	-0.0067476	-0.015082	0.903	0.99294	0.98797	0.99998	0.060545	0.13525	0.97026	0.99729	0.89242	0.99996	0.37969	0.84651	0.47191	0.94475	0.39727	0.72513	0.64155	1.4283	0.19445	0.84131	0.15319	0.53812
Acadm	4	-0.216442	-0.30684	-0.099283	-0.18017	-0.53642	0.43765	0.91684	0.59167	0.9458	0.036272	0.10824	0.80789	0.98524	0.91381	0.99236	-0.42502	-1.2727	0.15739	0.83159	0.20313	0.99998	-0.11818	-0.35529	0.62966	0.96132	0.72237	0.99996	-0.056461	-0.16842	0.73789	0.98474	0.86625	0.95617	0.042822	0.1284	0.89274	0.99193	0.89784	0.96536
Acads	4	0.17945	-0.04252	-0.20721	-0.11934	-0.36627	0.54598	0.94348	0.71416	0.96395	-0.29879	-0.81867	0.25205	0.89845	0.41297	0.95614	-0.17597	-0.54365	0.57948	0.96717	0.58668	0.99998	-0.13345	-0.37566	0.60297	0.95815	0.70717	0.99996	0.41544	1.2816	0.4134	0.92393	0.19998	0.57422	0.62265	1.7485	0.21346	0.84936	0.080375	0.43992
Acadsb	4	0.546816	-0.35635	0.06669	0.54543	1.1172	0.13538	0.77233	0.26391	0.89431	-0.0013864	-0.0027424	0.7262	0.97959	0.99781	0.99992	0.45531	0.94217	0.039195	0.65535	0.34611	0.99998	0.81166	1.6576	0.014946	0.45666	0.09739	0.99996	0.64698	1.3291	0.1428	0.79261	0.1838	0.55855	0.58029	1.1718	0.25871	0.8747	0.24126	0.62523
Acadvl	4	-0.39099	-0.265561	-1.35703	0.24255	0.71757	0.62127	0.95625	0.47302	0.93596	0.63354	1.6517	0.13441	0.80684	0.098606	0.95279	-0.17391	-0.51339	0.58528	0.96717	0.60768	0.99998	0.091651	0.24032	0.89634	0.99511	0.81008	0.99996	-1.5717	-4.6256	0.0069137	0.35325	3.7358e-06	0.0011664	-0.21467	-0.55868	0.5074	0.94671	0.57638	0.83579
Acap1	4	0.030864	0.1825	-0.16416	-0.053268	-0.16875	0.67907	0.96441	0.86599	0.98175	-0.084132	-0.25852	0.5651	0.96574	0.796	0.98631	-0.31682	-1.013	0.28565	0.8927	0.31108	0.99998	-0.49932	-1.56	0.15032	0.80114	0.11876	0.99996	0.40461	1.2915	0.42819	0.92418	0.19651	0.57133	0.56877	1.7808	0.27045	0.8772	0.07495	0.43429
Acap2	4	-0.22564	-0.330219	-0.50514	0.29234	0.67823	0.51279	0.93442	0.49762	0.93633	0.51798	0.73694	0.25225	0.89845	0.46116	0.95614	0.067591	0.15744	0.6746	0.97931	0.8749	0.99998	0.39781	0.57731	0.27904	0.88057	0.56373	0.99996	0.51316	1.1929	0.27777	0.87775	0.23292	0.60025	1.0183	1.4732	0.019521	0.52097	0.1407	0.52349
Acap3	4	0.02901	-0.191	-0.4906	-0.049191	-0.16399	0.68858	0.96586	0.86974	0.98187	-0.078201	-0.21709	0.57506	0.96574	0.82814	0.98896	-0.94306	-3.1632	0.0074729	0.39623	0.0015604	0.99998	-0.75206	-2.106	0.04682	0.64072	0.035201	0.96469	-0.23109	-0.7712	0.47583	0.94612	0.44059	0.75298	0.25951	0.72728	0.73047	0.97483	0.46706	0.78148
Acat1	4	-0.52269	0.24394	-0.264568	-0.29943	-0.87342	0.2674	0.85898	0.38243	0.91641	0.22326	0.81363	0.77657	0.98142	0.41586	0.95614	0.4088	1.219	0.062732	0.73341	0.22286	0.99998	0.16486	0.60507	0.72559	0.97634	0.54513	0.99996	-0.30914	-0.90356	0.38127	0.90975	0.36623	0.70255	-0.044572	-0.16287	0.74973	0.9757	0.87062	0.95686
Acat2	4	-0.209865	0.49934	-0.27569	-0.11826	-0.40791	0.54822	0.94414	0.68334	0.95863	0.091605	0.25322	0.92558	0.99251	0.8001	0.98631	-0.14348	-0.50063	0.67078	0.97931	0.61663	0.99998	-0.64282	-1.7942	0.079406	0.7232	0.072784	0.99996	-0.50699	-1.7414	0.20929	0.84976	0.081622	0.44587	-0.2313	-0.64139	0.48854	0.94392	0.52127	0.80944
Acat3	4	0.32435	-0.14881	0.0775	0.59803	1.1422	0.095013	0.72126	0.25336	0.89431	0.27368	0.58671	0.66982	0.97002	0.5574	0.95697	0.21902	0.42215	0.28789	0.89308	0.67292	0.99998	0.36783	0.80367	0.3255	0.90396	0.42159	0.99996	0.04252	0.080639	0.91226	0.99678	0.93573	0.98059	-0.03498	-0.075266	0.76503	0.97757	0.94	0.97908
Acbd3	4	0.42526	0.30769	-1.0099	1.087	1.8219	0.0011692	0.13295	0.068477	0.88163	0.66174	1.4214	0.11296	0.77186	0.15521	0.95279	0.79218	1.3296	0.00076254	0.14423	0.18364	0.99998	0.48449	1.0505	0.17198	0.82132	0.2935	0.99996	-2.3705	-3.9005	0.00091505	0.13534	9.5994e-05	0.012031	-1.3606	-2.8873	0.019572	0.52097	0.0038855	0.13201
Acbd4	4	-0.09299	-0.335493	0.4069	0.24746	1.1231	0.61166	0.95433	0.26138	0.89431	0.34045	1.0836	0.53663	0.96345	0.27853	0.95279	-0.098273	-0.44761	0.80464	0.98246	0.65444	0.99998	0.23722	0.75887	0.56449	0.95146	0.44793	0.99996	-0.41754	-1.8856	0.27401	0.87659	0.059347	0.4078	-0.82444	-2.6138	0.093895	0.73015	0.0089548	0.20878
Acbd5	4	0.279167	-0.85843	-0.02416	0.26949	0.62492	0.56327	0.94854	0.53202	0.93854	-0.0096773	-0.019457	0.70861	0.9753	0.98448	0.99787	-0.09696	-0.22717	0.80799	0.98246	0.82029	0.99998	0.76147	1.5577	0.02308	0.52668	0.1193	0.99996	0.51275	1.1964	0.27828	0.87851	0.23153	0.59866	0.53691	1.0917	0.30969	0.89492	0.27495	0.65943
Acbd6	4	-1.22573	-0.37695	-0.493626	-0.69218	-2.1968	0.039296	0.58371	0.028033	0.87401	0.53355	1.1042	0.23237	0.88801	0.26952	0.95279	-0.25096	-0.81637	0.40461	0.92485	0.41429	0.99998	0.12599	0.26142	0.81689	0.98846	0.79377	0.99996	-0.50314	-1.6052	0.21163	0.85255	0.10844	0.47561	-0.0095142	-0.019726	0.80459	0.98247	0.98426	0.99514
Accs	4	0.241151	0.55307	-0.25784	0.27861	1.1158	0.54359	0.94265	0.26451	0.89431	0.037459	0.11093	0.81114	0.98524	0.91167	0.99236	0.12737	0.52152	0.50211	0.95536	0.602	0.99998	-0.4257	-1.2939	0.20507	0.84606	0.19568	0.99996	0.16754	0.67279	0.84973	0.99286	0.50108	0.78791	0.42538	1.2903	0.45519	0.93413	0.19695	0.58303
Acd	4	0.92605	-0.0319839	0.55718	0.21746	0.39425	0.67673	0.96324	0.6934	0.96079	-0.70859	-1.3646	0.032688	0.61487	0.17239	0.95279	-0.0097429	-0.018225	0.91287	0.99294	0.98546	0.99998	0.022241	0.04689	0.94057	0.99548	0.9626	0.99996	0.79871	1.4908	0.05958	0.66686	0.13602	0.50809	0.24153	0.49431	0.76183	0.9768	0.62109	0.85508
Acer3	4	0.104735	0.03569	-0.91258	-0.081785	-0.33799	0.62112	0.95625	0.73537	0.96792	-0.18652	-0.82371	0.39271	0.93286	0.41011	0.95614	0.32717	1.352	0.12994	0.81434	0.17639	0.99998	0.29148	1.2945	0.4558	0.93503	0.1955	0.99996	-0.79655	-3.2827	0.084693	0.70712	0.001028	0.057448	0.11603	0.51457	0.98033	0.99866	0.60685	0.8492
Acin1	4	-0.386375	0.62213	-0.47395	0.042835	0.1256	0.9059	0.9952	0.90005	0.98628	0.42921	0.80205	0.37878	0.92917	0.42252	0.95614	0.14143	0.42255	0.46439	0.9488	0.67262	0.99998	-0.4807	-0.90759	0.16237	0.81363	0.3641	0.99996	-0.27625	-0.80746	0.41965	0.92396	0.4194	0.73751	0.1977	0.37132	0.83804	0.98843	0.7104	0.89754
Acly	4	-1.30259	-0.55906	0.765681	-0.83386	-1.9428	0.018555	0.50069	0.052045	0.88163	0.46873	1.008	0.31752	0.91788	0.31346	0.95279	-0.20049	-0.46864	0.51731	0.95794	0.63933	0.99998	0.35857	0.77433	0.33852	0.90848	0.43874	0.99996	0.0095407	0.02226	0.85369	0.99286	0.98224	0.99369	-0.75614	-1.6315	0.11601	0.76449	0.10279	0.47183
Aco1	4	0.294	-0.41113	-0.463827	0.12923	0.42596	0.8842	0.99139	0.67014	0.95646	-0.16477	-0.60484	0.42718	0.94257	0.54529	0.95697	-0.15711	-0.52409	0.63139	0.97283	0.60021	0.99998	0.25402	0.9574	0.53053	0.94781	0.33836	0.99996	0.061533	0.20333	0.94449	0.99807	0.83888	0.94733	0.52536	1.9701	0.32261	0.90069	0.04883	0.39292
Aco2	4	-0.69333	0.90686	0.54344	0.10937	0.15297	0.93315	0.99703	0.87842	0.98223	0.8027	0.89833	0.044177	0.65604	0.36901	0.9542	0.21095	0.30368	0.30441	0.9008	0.76137	0.99998	-0.69591	-0.77549	0.061614	0.6809	0.43805	0.99996	0.79614	1.1375	0.060393	0.66889	0.25532	0.6187	0.2527	0.28179	0.7418	0.97541	0.77811	0.92533
Acod1	4	0.181494	0.35295	-0.01861	0.19767	0.83775	0.72187	0.9703	0.40217	0.9239	0.016176	0.055523	0.76371	0.98142	0.95572	0.99454	-0.10578	-0.45443	0.78156	0.982	0.64952	0.99998	-0.45873	-1.5834	0.17986	0.82727	0.11334	0.99996	-0.15972	-0.67436	0.57567	0.96235	0.50008	0.7877	-0.14111	-0.48598	0.60231	0.96072	0.62698	0.8578
Acot1	4	-0.301944	-0.328204	-0.275098	-0.070414	-0.25226	0.64374	0.95907	0.80084	0.97648	0.23153	0.67278	0.75954	0.98142	0.50109	0.95614	0.020666	0.074509	0.81409	0.98384	0.94061	0.99998	0.34887	1.0236	0.35438	0.90873	0.30603	0.99996	-0.25259	-0.90375	0.44736	0.93485	0.36613	0.70255	0.022508	0.065625	0.85908	0.99092	0.94768	0.98167
Acot13	4	-0.71105	0.143222	0.3996	-0.22655	-0.63259	0.36617	0.89567	0.527	0.93821	0.4845	1.1633	0.29485	0.91181	0.24472	0.95279	0.010232	0.02908	0.84805	0.98722	0.9768	0.99998	-0.13299	-0.32117	0.60388	0.95815	0.74808	0.99996	-0.3485	-0.97364	0.34096	0.89557	0.33024	0.67533	-0.7481	-1.7825	0.11911	0.7686	0.074664	0.43385
Acot2	4	-0.293923	-0.70761	-0.68507	0.028227	0.12562	0.87306	0.9905	0.90003	0.98628	0.32215	1.1175	0.57267	0.96574	0.26377	0.95279	-0.48091	-2.1415	0.11387	0.80068	0.032231	0.99998	0.2267	0.79024	0.5869	0.95477	0.42939	0.99996	-0.19822	-0.88088	0.5198	0.95205	0.37838	0.7105	0.48685	1.6948	0.37065	0.91123	0.09012	0.45304
Acot4	4	0.815345	0.10322	-0.456526	0.78868	2.4287	0.02308	0.52124	0.015154	0.74435	-0.026665	-0.092701	0.67439	0.97002	0.92614	0.99289	0.30184	0.93217	0.15678	0.83082	0.35125	0.99998	0.19862	0.69531	0.6503	0.96335	0.48686	0.99996	-0.097566	-0.2981	0.6688	0.97332	0.76563	0.91747	0.35896	1.2547	0.56408	0.95604	0.20959	0.59692
Acot7	4	-0.084605	0.262773	-0.259	-0.11268	-0.41022	0.55955	0.947	0.68164	0.95863	-0.028075	-0.077004	0.67165	0.97002	0.93862	0.99328	-0.089047	-0.33095	0.83371	0.98712	0.74068	0.99998	-0.35182	-0.97307	0.27401	0.879	0.33052	0.99996	0.54851	2.0332	0.23964	0.86554	0.042035	0.3728	0.80751	2.2354	0.082253	0.70775	0.025389	0.3239
Acot8	4	0.592345	-0.52341	0.2424	0.64653	1.624	0.067612	0.67801	0.10437	0.88163	0.054185	0.15932	0.84551	0.98783	0.87341	0.99036	-0.39168	-0.98228	0.19023	0.83942	0.32596	0.99998	0.13173	0.39241	0.80342	0.98669	0.69476	0.99996	-0.19968	-0.4962	0.51716	0.95136	0.61975	0.85422	-0.44208	-1.303	0.28163	0.88146	0.19259	0.57902
Acot9	4	-1.05109	0.68464	1.02405	-0.461	-0.75793	0.12745	0.76456	0.44849	0.93404	0.59009	0.86746	0.17152	0.83472	0.38569	0.95614	0.47748	0.81993	0.03101	0.61407	0.41226	0.99998	-0.20716	-0.31019	0.47166	0.93692	0.75641	0.99996	0.89895	1.5294	0.028621	0.53113	0.12617	0.49975	-0.1251	-0.1821	0.62478	0.96529	0.85551	0.95176
Acox1	4	0.38156	1.09997	0.507011	0.66552	1.62	0.058614	0.65068	0.10524	0.88163	0.28396	0.80095	0.64659	0.96823	0.42316	0.95614	-0.17263	-0.42122	0.58833	0.9674	0.6736	0.99998	-1.2726	-3.5875	0.0045753	0.30612	0.00033391	0.10768	0.5431	1.3228	0.24488	0.86559	0.18591	0.56054	0.036089	0.10216	0.88135	0.99193	0.91863	0.97227
Acox2	4	0.37724	-0.314719	-0.38307	-0.05926	-0.21301	0.66651	0.96052	0.83132	0.98017	-0.4365	-1.2968	0.13289	0.80462	0.1947	0.95279	-0.32638	-1.1756	0.27106	0.88542	0.23974	0.99998	-0.011661	-0.035242	0.86005	0.99357	0.97189	0.99996	0.2979	1.0728	0.60785	0.96833	0.28335	0.64046	0.68097	2.0557	0.16257	0.81934	0.039812	0.37241
Acox3	4	-0.45993	-0.28545	-0.21871	-0.41928	-1.5689	0.1548	0.78594	0.11668	0.88163	0.04065	0.14557	0.81653	0.98524	0.88426	0.99049	-0.49775	-1.8621	0.10315	0.79805	0.062591	0.99998	-0.2123	-0.76724	0.46302	0.93569	0.44294	0.99996	0.20612	0.77173	0.77673	0.98842	0.44028	0.75271	0.42483	1.5332	0.4559	0.93437	0.12523	0.50272
Acoxl	4	0.186206	-0.06219	0.30079	0.28076	0.76965	0.53871	0.94098	0.44151	0.93127	0.094554	0.26533	0.93203	0.99251	0.79076	0.98631	0.18132	0.50036	0.3649	0.91451	0.61682	0.99998	0.24351	0.68948	0.55178	0.95013	0.49052	0.99996	0.19174	0.52575	0.80408	0.99003	0.59906	0.8439	-0.10905	-0.30709	0.6503	0.96839	0.75877	0.91686
Acp1	4	0.51845	0.61293	0.40374	0.11309	0.30323	0.92344	0.99682	0.76171	0.97345	-0.40536	-1.0575	0.15363	0.81415	0.2903	0.95279	-0.36281	-0.98356	0.22393	0.86508	0.32533	0.99998	-0.97574	-2.5855	0.016725	0.47889	0.0097224	0.64543	-0.43362	-1.154	0.2612	0.87176	0.24849	0.61286	-0.83736	-2.1887	0.090438	0.72023	0.028619	0.33283
Acp2	4	-0.242701	-0.329852	0.29063	-0.30141	-0.90156	0.26501	0.85825	0.36729	0.91246	-0.058709	-0.19736	0.61126	0.96624	0.84354	0.98899	-0.28079	-0.84567	0.34706	0.91393	0.39773	0.99998	0.049062	0.16586	0.9972	0.99893	0.86827	0.99996	0.69273	2.0898	0.10986	0.74672	0.036634	0.36458	0.4021	1.3584	0.49245	0.94513	0.17433	0.56003
Acp5	4	-0.21154	0.29101	-0.32326	0.38274	1.2783	0.34015	0.89029	0.20115	0.89431	0.59428	1.6967	0.1673	0.83253	0.089753	0.95279	0.43797	1.4808	0.047125	0.68312	0.13867	0.99998	0.14696	0.4272	0.76676	0.98051	0.66924	0.99996	-0.4825	-1.5897	0.22398	0.85753	0.1119	0.48	-0.15924	-0.45048	0.57719	0.95808	0.65236	0.872
Acp6	4	0.540222	-0.116633	0.20984	0.63323	1.077	0.074323	0.69487	0.28148	0.89545	0.093008	0.30221	0.92837	0.99251	0.76249	0.98251	-0.19022	-0.32425	0.54364	0.96455	0.74575	0.99998	-0.073587	-0.24687	0.72157	0.97631	0.80501	0.99996	0.63643	1.0849	0.15225	0.80494	0.27797	0.63522	0.42659	1.4175	0.45382	0.93413	0.15633	0.54031
Acpp	4	-0.46839	-0.71719	-0.287827	-0.10737	-0.35981	0.56972	0.94999	0.71899	0.96512	0.36102	1.1727	0.49545	0.95887	0.24092	0.95279	-0.13423	-0.4523	0.69819	0.97931	0.65105	0.99998	0.58296	1.9103	0.091251	0.73537	0.056095	0.99996	-0.19399	-0.64962	0.52666	0.95374	0.51594	0.79719	0.093837	0.30566	0.98007	0.99866	0.75986	0.91714
Acrbp	4	-0.36005	-0.17147	-0.67474	-0.25821	-0.77147	0.32047	0.88222	0.44043	0.93087	0.10184	0.31061	0.9481	0.9935	0.7561	0.98238	0.10304	0.32109	0.56916	0.96601	0.74814	0.99998	0.27451	0.84832	0.48757	0.93879	0.39626	0.99996	-0.38416	-1.1516	0.30471	0.88935	0.24947	0.6137	0.29058	0.89315	0.67755	0.96975	0.37177	0.72533
Acsbg1	4	0.30144	0.00598	0.45658	0.15918	0.61685	0.81211	0.98157	0.53733	0.93854	-0.14226	-0.74042	0.46312	0.95007	0.45905	0.95614	-0.10053	-0.38968	0.79803	0.982	0.69677	0.99998	-0.10651	-0.55824	0.65177	0.96349	0.57668	0.99996	0.13519	0.52352	0.91485	0.99678	0.60061	0.84475	-0.32139	-1.6784	0.38849	0.92083	0.09327	0.4579
Acsbg3	4	0.329715	0.092966	-0.25645	0.086595	0.25271	0.99039	0.99795	0.80049	0.97644	-0.24312	-0.65987	0.31513	0.91552	0.50934	0.95614	0.067254	0.20218	0.67561	0.97931	0.83978	0.99998	-0.025712	-0.074473	0.82746	0.98951	0.94063	0.99996	0.1771	0.52196	0.82995	0.99054	0.6017	0.84505	0.43355	1.2381	0.44314	0.93192	0.21568	0.60221
Acsf2	4	-0.27117	-0.05661	-0.321551	0.111	0.44202	0.92929	0.99695	0.65848	0.95592	0.38217	0.89852	0.45854	0.9473	0.36891	0.9542	0.13625	0.54841	0.47852	0.9535	0.58341	0.99998	0.19286	0.45994	0.66311	0.96608	0.64556	0.99996	-0.029811	-0.11864	0.78486	0.98842	0.90556	0.96997	0.29174	0.68995	0.67541	0.96975	0.49023	0.79251
Acsf3	4	0.28387	-0.047677	-0.16602	0.14871	0.33018	0.83605	0.98473	0.74126	0.96878	-0.13516	-0.26657	0.47573	0.95292	0.7898	0.98631	-0.12534	-0.28491	0.72345	0.97931	0.77571	0.99998	-0.077663	-0.16019	0.71272	0.97517	0.87273	0.99996	0.14768	0.33022	0.8904	0.99597	0.74123	0.90609	0.3137	0.63854	0.63927	0.96839	0.52312	0.81018
Acsl1	4	0.80815	-0.0375	0.67369	0.6848	1.3529	0.05043	0.62626	0.1761	0.89157	-0.12335	-0.28056	0.49555	0.95898	0.77904	0.98441	0.36088	0.71904	0.098572	0.79183	0.47211	0.99998	0.39838	0.91792	0.27807	0.88057	0.35866	0.99996	-0.19371	-0.37785	0.52702	0.95374	0.70554	0.89238	-0.8674	-1.9752	0.082609	0.70775	0.048251	0.39104
Acsl3	4	-0.207784	0.19447	-0.14955	-0.018604	-0.068831	0.75716	0.97512	0.94512	0.99301	0.18918	0.53462	0.85313	0.98887	0.59291	0.95981	0.10541	0.39262	0.56321	0.96565	0.6946	0.99998	-0.08906	-0.2532	0.68792	0.97288	0.80012	0.99996	-0.44841	-1.6527	0.2494	0.86923	0.098398	0.46289	-0.29886	-0.84608	0.41264	0.92288	0.39751	0.74099
Acsl4	4	-0.41106	0.77949	1.16818	0.46927	0.90478	0.21575	0.82874	0.36558	0.91246	0.88033	1.4326	0.025215	0.56735	0.15196	0.95279	0.46116	0.90012	0.037212	0.64836	0.36805	0.99998	-0.31833	-0.51923	0.31234	0.90007	0.6036	0.99996	0.36274	0.69912	0.49916	0.95035	0.48448	0.7795	-0.80544	-1.3111	0.099131	0.74141	0.18981	0.57646
Acsl5	4	0.1451	-0.1449	0.093879	0.543	1.5409	0.13782	0.77469	0.12334	0.88163	0.3979	1.06	0.43211	0.94345	0.28915	0.95279	-0.30773	-0.87481	0.30004	0.90017	0.38168	0.99998	-0.16283	-0.43554	0.54939	0.95001	0.66317	0.99996	0.1842	0.52166	0.81745	0.99003	0.60191	0.84506	0.090321	0.24097	0.97423	0.99866	0.80958	0.93639
Acsm1	4	-0.424442	-0.587495	0.04083	-0.077262	-0.15582	0.63073	0.95823	0.87618	0.98223	0.34718	0.68806	0.52229	0.96296	0.49142	0.95614	-0.014405	-0.029523	0.92832	0.99482	0.97645	0.99998	0.57309	1.1486	0.096386	0.73584	0.2507	0.99996	0.87021	1.7842	0.035382	0.56518	0.07439	0.43526	0.82938	1.6581	0.072391	0.68859	0.09729	0.46294
Acsm3	4	-0.213247	-0.399926	-0.37027	-0.25425	-0.74971	0.3255	0.88634	0.45343	0.93462	-0.041003	-0.085596	0.64654	0.96823	0.93179	0.99313	-0.34758	-1.0395	0.24147	0.87223	0.29856	0.99998	0.052346	0.11258	0.98948	0.99821	0.91036	0.99996	0.48075	1.4376	0.31859	0.89053	0.15055	0.52359	0.85102	1.8277	0.063088	0.67167	0.0676	0.42376
Acss1	4	0.44914	-0.30225	-0.56731	0.43405	2.1024	0.26104	0.85641	0.035519	0.88163	-0.01509	-0.053672	0.69697	0.97453	0.9572	0.99454	-0.19437	-0.94155	0.53383	0.96256	0.34642	0.99998	0.10788	0.39061	0.85918	0.99357	0.69609	0.99996	-0.36385	-1.7552	0.32454	0.89053	0.079226	0.44255	0.20346	0.73095	0.82787	0.9856	0.46481	0.77968
Acss2	4	0.021685	-0.274881	0.32919	0.060966	0.19579	0.94927	0.99703	0.84478	0.98147	0.039281	0.10861	0.8143	0.98524	0.91351	0.99236	0.057989	0.1872	0.70312	0.97931	0.85151	0.99998	0.33287	0.93494	0.38148	0.91802	0.34982	0.99996	0.53398	1.721	0.2553	0.87176	0.085249	0.45138	0.20479	0.57118	0.82533	0.98526	0.56788	0.83314
Acta2	4	-0.63173	0.234621	-0.280819	-0.31874	-1.2284	0.24595	0.84714	0.2193	0.89431	0.31299	0.87039	0.59082	0.96624	0.38409	0.95614	0.032231	0.12468	0.77952	0.982	0.90078	0.99998	-0.20239	-0.56892	0.47989	0.93879	0.56941	0.99996	0.034171	0.13184	0.8968	0.99608	0.89511	0.96698	0.31499	0.88163	0.63698	0.96839	0.37798	0.7299
Actb	4	0.53039	0.5085	0.42512	1.2762	1.5793	0.00015251	0.036145	0.11427	0.88163	0.74581	0.83699	0.064765	0.69048	0.4026	0.95614	0.75176	0.93178	0.0011692	0.16312	0.35145	0.99998	0.24326	0.27733	0.55239	0.95013	0.78153	0.99996	0.19203	0.23469	0.80337	0.99003	0.81445	0.93778	-0.23309	-0.26116	0.48676	0.94368	0.79397	0.9301
Actg1	4	1.00985	0.03091	0.541964	0.63495	1.5112	0.073357	0.69341	0.13072	0.88273	-0.3749	-0.86229	0.17727	0.83886	0.38853	0.95614	-0.12228	-0.29283	0.73209	0.9798	0.76965	0.99998	-0.15319	-0.37537	0.56586	0.95153	0.70738	0.99996	-0.094136	-0.22087	0.67444	0.97351	0.82519	0.94199	-0.6361	-1.475	0.16639	0.82322	0.1402	0.52273
Actl6a	4	-0.55482	2.08182	1.42448	-1.0323	-1.0212	0.0064562	0.34483	0.30714	0.90516	-0.47748	-0.52581	0.10848	0.76818	0.59902	0.96088	0.65632	0.71689	0.0041686	0.32411	0.47344	0.99998	-1.4255	-1.598	0.0027452	0.24771	0.11005	0.99996	0.93461	0.99319	0.022368	0.50458	0.32062	0.66754	-0.48987	-0.54941	0.24854	0.8665	0.58272	0.83896
Actn1	4	-0.166701	0.01711	-0.276406	-0.16563	-0.76518	0.4618	0.9211	0.44416	0.93156	0.0010705	0.0049897	0.73042	0.98049	0.99602	0.99978	-0.21171	-0.98128	0.49108	0.95428	0.32645	0.99998	-0.22882	-1.0692	0.43816	0.93406	0.28496	0.99996	-0.26949	-1.2439	0.42708	0.92396	0.21355	0.58466	0.0069157	0.032315	0.83153	0.98632	0.97422	0.99102
Actn3	4	-0.06505	-0.06122	0.94399	0.17058	0.53699	0.78517	0.9778	0.59127	0.94568	0.23563	0.79374	0.75161	0.98142	0.42734	0.95614	-0.32965	-1.044	0.26587	0.88048	0.29649	0.99998	-0.26843	-0.91832	0.37812	0.91639	0.35845	0.99996	0.30416	0.96116	0.59768	0.9667	0.33647	0.67893	-0.63983	-2.1372	0.16456	0.82129	0.032583	0.34891
Actn4	4	-0.650342	-0.25068	-0.258515	0.0049577	0.015502	0.81338	0.98167	0.98763	0.99876	0.6553	1.578	0.11804	0.77972	0.11457	0.95279	-0.10868	-0.34372	0.77322	0.982	0.73106	0.99998	0.142	0.3438	0.77779	0.98287	0.731	0.99996	0.033795	0.106	0.89604	0.99608	0.91558	0.9738	0.29231	0.70473	0.67414	0.96975	0.48098	0.78878
Actr10	4	0.230894	0.33666	0.246474	-0.014286	-0.030824	0.76717	0.97563	0.97541	0.99688	-0.24518	-0.46872	0.31335	0.91551	0.63927	0.96572	0.64276	1.4666	0.0047278	0.32526	0.14249	0.99998	0.3061	0.6143	0.42738	0.92962	0.53901	0.99996	-0.034826	-0.075606	0.77586	0.98842	0.93973	0.98144	-0.2813	-0.54442	0.43094	0.92878	0.58615	0.8415
Actr1a	4	-0.047481	-0.31668	0.23639	-0.074704	-0.243	0.63611	0.95867	0.80801	0.97722	-0.027223	-0.093849	0.67328	0.97002	0.92523	0.99278	-0.12907	-0.42026	0.71283	0.97931	0.67429	0.99998	0.18761	0.64984	0.67485	0.97018	0.5158	0.99996	0.81114	2.6445	0.054547	0.64991	0.0081812	0.2069	0.57475	1.9902	0.26389	0.87607	0.046573	0.38993
Actr1b	4	-0.16494	0.371591	0.155273	0.24543	0.80554	0.61588	0.95506	0.42051	0.92789	0.41037	0.9149	0.40913	0.93767	0.36024	0.9542	-0.062699	-0.20555	0.91683	0.99297	0.83715	0.99998	-0.43429	-0.97832	0.1978	0.83912	0.32792	0.99996	0.1464	0.47972	0.89268	0.99608	0.63142	0.86225	-0.008873	-0.019808	0.8055	0.98247	0.9842	0.99514
Actr2	4	-0.07634	0.73357	-0.1344	-0.47528	-0.45987	0.11865	0.75583	0.64561	0.95452	-0.39894	-0.28608	0.15846	0.82045	0.77482	0.9839	-0.15511	-0.15789	0.63718	0.97374	0.87454	0.99998	-0.88868	-0.65646	0.025266	0.53614	0.51153	0.99996	-0.23091	-0.22634	0.47608	0.94634	0.82094	0.94046	-0.09651	-0.070967	0.66931	0.96975	0.94342	0.98036
Actr3	4	0.74514	0.86689	-0.55213	0.48874	1.154	0.19297	0.81881	0.24851	0.89431	-0.2564	-0.4338	0.29937	0.91352	0.66444	0.96767	0.53959	1.2917	0.01581	0.51236	0.19645	0.99998	-0.3273	-0.57121	0.30136	0.89357	0.56785	0.99996	0.10066	0.23656	0.98358	0.99923	0.813	0.93707	0.65279	1.1407	0.18601	0.83676	0.25399	0.63712
Actr3b	4	0.32615	-0.412146	-0.028181	0.49941	1.5221	0.18088	0.80748	0.128	0.88163	0.17326	0.45638	0.89035	0.99056	0.64811	0.96604	-0.41859	-1.2738	0.16339	0.8362	0.20274	0.99998	-0.0064438	-0.01706	0.87306	0.9941	0.98639	0.99996	0.074979	0.22782	0.97011	0.99906	0.81978	0.94018	0.10316	0.2727	0.99705	0.9999	0.78508	0.92841
Actr5	4	-1.23639	-0.237826	0.14497	-0.839	-1.5843	0.017844	0.49367	0.11312	0.88163	0.39739	0.75044	0.43287	0.94345	0.45299	0.95614	-0.17459	-0.33299	0.5836	0.96717	0.73914	0.99998	0.063236	0.12293	0.96355	0.997	0.90216	0.99996	0.5778	1.1011	0.20858	0.84952	0.27087	0.63026	0.43283	0.82872	0.44446	0.93192	0.40727	0.74769
Actr6	4	-0.07988	-0.02677	0.506	-0.63472	-1.0763	0.054344	0.64379	0.28178	0.89545	-0.55484	-0.94899	0.075339	0.72023	0.34263	0.95356	0.26671	0.48558	0.20238	0.84865	0.62727	0.99998	0.29348	0.53119	0.45199	0.93406	0.59528	0.99996	-0.22224	-0.38256	0.48788	0.94722	0.70205	0.89086	-0.72824	-1.2523	0.12648	0.78511	0.21047	0.59754
Actr8	4	0.33478	-0.80997	0.231993	0.55905	1.3454	0.12333	0.76326	0.17849	0.89158	0.22427	0.53469	0.77459	0.98142	0.59287	0.95981	-0.16917	-0.40667	0.59789	0.96994	0.68425	0.99998	0.6408	1.5463	0.06324	0.68199	0.12204	0.99996	0.17965	0.43063	0.82599	0.99003	0.66674	0.87757	-0.052343	-0.12538	0.73774	0.97483	0.90022	0.96629
Acvr1	4	-0.51717	0.325039	-0.655585	-0.66073	-2.4813	0.046769	0.61456	0.013092	0.72009	-0.14356	-0.49571	0.46108	0.94904	0.6201	0.96399	-0.070601	-0.26554	0.89055	0.99078	0.79059	0.99998	-0.39564	-1.3693	0.23059	0.85682	0.17091	0.99996	-0.089305	-0.33545	0.68258	0.97609	0.73729	0.90449	0.56628	1.9603	0.27304	0.8772	0.049962	0.39486
Acvr1b	4	-0.11249	-0.1878	0.26285	0.14684	0.414	0.84124	0.98671	0.67887	0.95831	0.25933	0.65413	0.69986	0.97475	0.51303	0.95614	-0.26676	-0.752	0.37405	0.91746	0.45205	0.99998	-0.07896	-0.20296	0.70998	0.97474	0.83917	0.99996	0.65184	1.8404	0.13914	0.7894	0.065716	0.42034	0.38899	0.99299	0.51512	0.94747	0.32071	0.69001
Acvr2a	4	-0.463549	0.79629	1.35555	-0.51455	-1.0883	0.099741	0.72876	0.27645	0.89431	-0.051001	-0.13974	0.62656	0.96624	0.88886	0.99051	0.19304	0.42839	0.3405	0.91261	0.66837	0.99998	-0.60325	-1.6768	0.094098	0.73537	0.093583	0.99996	0.98095	2.1743	0.014793	0.42878	0.029681	0.34308	-0.3746	-1.0298	0.33725	0.90616	0.3031	0.67809
Acvr2b	4	-0.02519	-0.247083	0.01478	-0.17636	-0.61875	0.44426	0.91967	0.53608	0.93854	-0.15117	-0.54215	0.44893	0.94533	0.58771	0.95917	-0.15148	-0.53377	0.6475	0.97593	0.5935	0.99998	0.095603	0.34813	0.8874	0.99482	0.72775	0.99996	-0.18444	-0.64693	0.53988	0.95546	0.51767	0.79794	-0.19922	-0.71885	0.52753	0.94979	0.47223	0.78433
Acvrl1	4	0.41548	-0.45627	0.19106	0.13341	0.39348	0.87403	0.9905	0.69396	0.96079	-0.28207	-0.99507	0.26862	0.89851	0.3197	0.95279	-0.14224	-0.42506	0.67419	0.97931	0.67079	0.99998	0.31403	1.17	0.41381	0.92658	0.24201	0.99996	0.59143	1.7649	0.19374	0.83523	0.077588	0.44004	0.40037	1.4682	0.49555	0.94614	0.14204	0.52462
Acy1	4	-0.88873	-0.07325	-0.05501	-0.61426	-2.2627	0.061207	0.66172	0.023657	0.84765	0.27447	0.86366	0.66834	0.97002	0.38778	0.95614	0.30895	1.1459	0.14849	0.82903	0.25183	0.99998	0.3822	1.2195	0.30329	0.89486	0.22266	0.99996	0.19923	0.73679	0.78898	0.98842	0.46125	0.76611	0.25424	0.80488	0.73875	0.97483	0.42089	0.75568
Acy3	4	-0.07555	0.16337	0.092216	0.2858	0.85672	0.52727	0.93945	0.3916	0.91908	0.36135	1.3246	0.49494	0.95857	0.1853	0.95279	0.28903	0.86578	0.17228	0.8362	0.38661	0.99998	0.12566	0.46264	0.8176	0.98846	0.64363	0.99996	0.074875	0.22399	0.96985	0.99906	0.82277	0.94151	-0.017341	-0.063728	0.79193	0.98075	0.94919	0.98204
Acyp1	4	0.167943	0.167034	-0.38358	-0.027027	-0.10514	0.73835	0.97308	0.91626	0.98892	-0.19497	-0.52484	0.37934	0.92917	0.5997	0.96119	-0.097336	-0.38188	0.80713	0.98246	0.70255	0.99998	-0.26437	-0.74231	0.38427	0.91802	0.4579	0.99996	0.38792	1.5173	0.45692	0.93822	0.1292	0.5012	0.7715	2.1714	0.10162	0.74229	0.029901	0.33804
Acyp2	4	-0.12887	-0.238029	-0.621289	0.24589	0.80974	0.61497	0.95506	0.41809	0.92688	0.37476	0.76284	0.47135	0.95291	0.44556	0.95614	0.017411	0.058374	0.82507	0.98712	0.95345	0.99998	0.25544	0.53317	0.52743	0.94637	0.59392	0.99996	-0.096249	-0.31583	0.67099	0.97332	0.75213	0.91075	0.52504	1.0818	0.32312	0.90069	0.27933	0.66211
Ada	4	-0.067251	-0.132972	-0.05688	-0.15737	-0.50085	0.47598	0.92381	0.61648	0.95007	-0.090119	-0.23981	0.55264	0.96468	0.81048	0.98772	-0.15791	-0.50998	0.6292	0.97283	0.61006	0.99998	-0.024938	-0.068679	0.82919	0.98951	0.94524	0.99996	0.383	1.2317	0.46546	0.94168	0.21806	0.58783	0.43988	1.199	0.43287	0.92967	0.23051	0.61581
Adal	4	0.25584	0.0087	-0.073199	-0.08138	-0.21763	0.62198	0.95625	0.82772	0.97922	-0.33722	-0.88883	0.21244	0.87244	0.3741	0.9544	-0.80371	-2.167	0.017589	0.52897	0.030238	0.99998	-0.81241	-2.1658	0.036043	0.60034	0.030329	0.9571	-0.045458	-0.12224	0.757	0.9876	0.90271	0.96907	0.027741	0.073893	0.86844	0.99092	0.9411	0.97959
Adam10	4	-0.4077	0.43373	-0.5672	0.17039	0.3589	0.78552	0.9778	0.71967	0.96512	0.57809	1.0481	0.18311	0.84439	0.29461	0.95279	-0.10051	-0.21478	0.79813	0.982	0.82994	0.99998	-0.53424	-0.9757	0.12862	0.7847	0.32921	0.99996	-1.7578	-3.5859	0.0036602	0.26087	0.0003359	0.027769	-1.1906	-2.0824	0.031112	0.58034	0.037304	0.36599
Adam15	4	-0.19092	-0.39392	0.778728	0.20294	0.51482	0.70993	0.96877	0.60668	0.94821	0.39386	1.236	0.43938	0.94508	0.21644	0.95279	-0.15914	-0.4098	0.62635	0.97283	0.68195	0.99998	0.23478	0.74484	0.56937	0.95257	0.45637	0.99996	0.75463	1.9448	0.076864	0.70097	0.051799	0.39406	-0.024098	-0.075736	0.78171	0.97905	0.93963	0.97908
Adam17	4	-0.95936	-0.61832	-0.35616	-0.7032	-1.5455	0.037263	0.57668	0.12223	0.88163	0.25616	0.4233	0.70647	0.97475	0.67207	0.97005	-0.26613	-0.60895	0.37553	0.91892	0.54256	0.99998	0.35219	0.59725	0.34869	0.90873	0.55034	0.99996	0.49842	1.1372	0.29551	0.88638	0.25545	0.6187	0.85458	1.4409	0.061461	0.66961	0.14963	0.53346
Adam1a	4	0.41332	0.258112	-0.22432	0.63747	2.1585	0.071628	0.68829	0.030892	0.88163	0.22415	0.92626	0.77485	0.98142	0.35431	0.9542	0.17028	0.58004	0.39022	0.92428	0.56189	0.99998	-0.087832	-0.36569	0.69086	0.97288	0.71459	0.99996	-0.66432	-2.2106	0.12673	0.77295	0.027063	0.33465	-0.44	-1.8184	0.28295	0.88153	0.069011	0.42565
Adam22	4	-0.38386	0.351344	0.1251	-0.1399	-0.44415	0.50719	0.93313	0.65694	0.95592	0.24396	0.75047	0.73357	0.98083	0.45297	0.95614	0.33829	1.0756	0.11896	0.80068	0.28211	0.99998	-0.013054	-0.04047	0.85639	0.99299	0.96772	0.99996	0.43056	1.3674	0.38946	0.91324	0.17152	0.54541	0.30546	0.94439	0.65238	0.96839	0.34497	0.70763
Adam3	4	0.17128	0.33351	0.00103	0.20762	0.57282	0.69996	0.96721	0.56676	0.94467	0.03634	0.11003	0.80814	0.98524	0.91239	0.99236	0.02508	0.069348	0.80057	0.982	0.94471	0.99998	-0.30843	-0.94773	0.32495	0.90396	0.34327	0.99996	0.57061	1.5769	0.21666	0.85582	0.11483	0.48429	0.56958	1.7492	0.26958	0.8772	0.080253	0.43986
Adam33	4	-0.41364	0.13237	-0.47927	0.0119	0.04575	0.83102	0.98405	0.96351	0.99497	0.42554	1.1382	0.38508	0.93089	0.25503	0.95279	-0.14853	-0.57118	0.65614	0.97701	0.56788	0.99998	-0.2809	-0.75472	0.36139	0.90873	0.45042	0.99996	-0.21535	-0.82611	0.49718	0.94943	0.40874	0.73147	0.26392	0.70817	0.72325	0.9741	0.47884	0.78792
Adam4	4	0.101848	-0.05293	0.27165	-0.033352	-0.081151	0.72304	0.97072	0.93532	0.99143	-0.1352	-0.33279	0.47567	0.95292	0.73929	0.98236	-0.20863	-0.51124	0.4985	0.95449	0.60918	0.99998	-0.1557	-0.38766	0.56113	0.95144	0.69827	0.99996	1.0404	2.5573	0.0090997	0.3706	0.01055	0.23625	0.76875	1.9142	0.1035	0.74442	0.055592	0.40188
Adam9	4	-0.45518	-0.31098	-0.65228	-0.24316	-0.87839	0.34111	0.89029	0.37973	0.91403	0.21202	0.48778	0.80123	0.98432	0.62571	0.96463	-0.1019	-0.37138	0.7936	0.982	0.71036	0.99998	0.20908	0.48643	0.62651	0.96132	0.62666	0.99996	0.19472	0.70707	0.79803	0.99003	0.47952	0.77716	0.847	1.9683	0.064664	0.67441	0.04903	0.39302
Adamts1	4	-0.287167	-0.02826	-0.363308	-0.18735	-0.78967	0.42713	0.91302	0.42972	0.92906	0.099817	0.46199	0.94337	0.99251	0.64409	0.96572	-0.31599	-1.3355	0.28682	0.8927	0.1817	0.99998	-0.28773	-1.343	0.35245	0.90873	0.17926	0.99996	-0.098168	-0.41383	0.66768	0.97332	0.679	0.88261	0.26514	1.2352	0.72182	0.9741	0.21675	0.60301
Adamts10	4	-0.99136	-0.238217	-1.05339	-0.33338	-0.80755	0.23029	0.84076	0.41935	0.92787	0.65798	1.1674	0.11611	0.77804	0.24304	0.95279	0.0046726	0.011476	0.86457	0.98838	0.99084	0.99998	0.24289	0.43542	0.55325	0.95013	0.66326	0.99996	-0.96388	-2.3169	0.048091	0.62484	0.020507	0.3056	0.089511	0.15885	0.97296	0.99849	0.87379	0.95803
Adamts14	4	-0.24881	-0.40155	0.06969	0.25309	1.0431	0.59926	0.95334	0.2969	0.90094	0.5019	1.9713	0.27091	0.89941	0.048684	0.95279	-0.19353	-0.80101	0.53576	0.96256	0.42312	0.99998	0.20802	0.81972	0.62905	0.96132	0.41237	0.99996	0.23224	0.95833	0.72752	0.98344	0.3379	0.67984	0.16255	0.63933	0.89904	0.99193	0.52261	0.81013
Adamts4	4	-0.10564	-0.326019	-0.229357	0.18717	0.56321	0.74745	0.97387	0.57329	0.94467	0.29281	0.73356	0.62854	0.96624	0.46322	0.95614	0.0028707	0.0086825	0.87083	0.98886	0.99307	0.99998	0.32889	0.82785	0.38717	0.91958	0.40775	0.99996	0.017383	0.052268	0.86752	0.9951	0.95831	0.98733	0.24674	0.61994	0.75273	0.9757	0.5353	0.81645
Adamts6	4	0.64209	-0.2419	-0.1603	0.17894	0.43641	0.76646	0.97535	0.66254	0.95592	-0.46315	-0.98497	0.11535	0.77747	0.32464	0.95279	-1.2461	-3.0115	0.0010167	0.16312	0.0026	0.99998	-1.0042	-2.1951	0.01459	0.4534	0.028159	0.94997	-1.496	-3.3692	0.0079305	0.35426	0.00075384	0.046631	-1.3357	-2.7596	0.02069	0.52926	0.0057864	0.16284
Adamtsl4	4	-0.119834	-0.392468	0.29054	0.024646	0.061959	0.86305	0.99014	0.9506	0.99316	0.14448	0.34756	0.95542	0.99392	0.72817	0.98024	0.092022	0.23169	0.60063	0.97027	0.81678	0.99998	0.48449	1.1781	0.17198	0.82132	0.23875	0.99996	0.81514	2.0539	0.052666	0.6399	0.039982	0.36873	0.5246	1.2715	0.32357	0.90069	0.20356	0.59004
Adamtsl5	4	-0.20151	0.204227	0.12343	0.20304	0.71413	0.70972	0.96877	0.47515	0.93596	0.40455	1.5643	0.41859	0.93813	0.11776	0.95279	0.18079	0.64352	0.36648	0.91543	0.51989	0.99998	-0.023437	-0.091799	0.83244	0.98951	0.92686	0.99996	-0.24348	-0.85242	0.45915	0.93918	0.39398	0.72342	-0.36691	-1.4099	0.34426	0.90896	0.15858	0.54349
Adap1	4	0.05634	0.109873	0.18912	-0.34822	-1.1483	0.21509	0.82867	0.25085	0.89431	-0.40456	-1.2281	0.15403	0.81452	0.2194	0.95279	0.16062	0.53062	0.41264	0.92904	0.59569	0.99998	0.050747	0.15546	0.99273	0.99842	0.87646	0.99996	0.52035	1.7183	0.26897	0.87442	0.085746	0.45187	0.33123	1.0134	0.61014	0.96232	0.31086	0.68339
Adap2	4	0.10606	-0.08233	-0.215	0.32483	0.85877	0.44217	0.91908	0.39047	0.91843	0.21877	0.56598	0.78598	0.98142	0.57141	0.95786	-0.39003	-1.031	0.1917	0.84181	0.30256	0.99998	-0.3077	-0.80567	0.32606	0.90396	0.42043	0.99996	0.60419	1.6001	0.18194	0.82912	0.10958	0.47667	0.81919	2.1491	0.076	0.6966	0.031625	0.34518
Adar	4	-0.32243	-0.607118	-0.67977	0.24897	0.87171	0.60851	0.95433	0.38337	0.91722	0.5714	1.073	0.18972	0.8519	0.28325	0.95279	0.0045319	0.015904	0.86518	0.98838	0.98731	0.99998	0.61165	1.1636	0.076559	0.71646	0.24458	0.99996	0.13642	0.47713	0.91226	0.99678	0.63327	0.86317	0.81619	1.5458	0.077729	0.69968	0.12216	0.49795
Adarb1	4	0.069677	-0.00405	-0.17502	0.13771	0.44134	0.86366	0.99032	0.65897	0.95592	0.068033	0.17775	0.87393	0.98925	0.85892	0.98971	0.18157	0.58519	0.36445	0.91451	0.55842	0.99998	0.18562	0.49201	0.67912	0.97213	0.62272	0.99996	-0.31403	-1.0025	0.37588	0.90969	0.31613	0.6638	-0.13901	-0.36492	0.60521	0.96072	0.71517	0.89931
Adat1	4	-0.01481	0.201382	0.32141	0.23151	0.80565	0.64445	0.95907	0.42044	0.92789	0.24632	0.66616	0.72803	0.97982	0.50531	0.95614	0.079962	0.28005	0.63616	0.97294	0.77944	0.99998	-0.12142	-0.33359	0.62402	0.96132	0.73869	0.99996	-0.67082	-2.3099	0.12465	0.7718	0.020896	0.30774	-0.99223	-2.6316	0.056987	0.65641	0.0084984	0.20412
Adat2	4	-0.47558	-0.10011	-0.243741	-0.52137	-0.84961	0.096487	0.72409	0.39554	0.92007	-0.04579	-0.086918	0.63622	0.96624	0.93074	0.99305	-0.58761	-1.0484	0.060343	0.72202	0.29446	0.99998	-0.4875	-0.97062	0.15754	0.80998	0.33174	0.99996	-0.223	-0.37946	0.48691	0.94722	0.70434	0.89175	0.020741	0.040392	0.85644	0.99092	0.96778	0.98832
Adat3	4	1.12529	0.370132	1.46379	0.23726	0.50076	0.63205	0.95823	0.61654	0.95007	-0.88803	-1.6425	0.011489	0.431	0.10048	0.95279	0.3062	0.66328	0.15175	0.83034	0.50715	0.99998	-0.063932	-0.12143	0.74119	0.97913	0.90335	0.99996	0.27529	0.58395	0.64892	0.97332	0.55925	0.82294	-1.1885	-2.211	0.031213	0.58034	0.027036	0.32715
Adck1	4	0.212077	-0.308498	0.30028	0.26158	0.91003	0.58111	0.95114	0.36281	0.91246	0.049503	0.16237	0.83473	0.9877	0.87101	0.99033	-0.30201	-1.0522	0.30863	0.90296	0.29271	0.99998	0.0064884	0.021487	0.90306	0.99511	0.98286	0.99996	0.41438	1.4435	0.41493	0.92393	0.14888	0.52185	0.1141	0.3763	0.98394	0.99912	0.70669	0.89564
Adck2	4	-0.104401	0.39866	0.391303	-0.14364	-0.50398	0.49982	0.92942	0.61428	0.94915	-0.039239	-0.1078	0.64979	0.96823	0.91416	0.99236	-0.11372	-0.39955	0.75731	0.98162	0.68949	0.99998	-0.51238	-1.4424	0.14351	0.80087	0.14919	0.99996	0.033563	0.11773	0.89573	0.99608	0.90628	0.97015	-0.35774	-0.98697	0.35255	0.9101	0.32366	0.69218
Adck5	4	-0.475917	0.0324027	0.497849	-0.52915	-1.8073	0.093539	0.72016	0.070717	0.88163	-0.053233	-0.15319	0.62249	0.96624	0.87825	0.99049	0.0010107	0.0034949	0.87682	0.98922	0.99721	0.99998	-0.031392	-0.090918	0.81379	0.9876	0.92756	0.99996	0.46031	1.5886	0.34696	0.89838	0.11215	0.48046	-0.037539	-0.10846	0.76188	0.9768	0.91363	0.9708
Adcy2	4	-0.1157	0.058655	0.0297	0.12453	0.40612	0.89523	0.99279	0.68465	0.95956	0.24023	0.80006	0.7414	0.98142	0.42368	0.95614	-0.051245	-0.16807	0.95308	0.99746	0.86653	0.99998	-0.1099	-0.36919	0.64526	0.96278	0.71199	0.99996	-0.46531	-1.5092	0.23608	0.86554	0.13124	0.50375	-0.49501	-1.6476	0.24544	0.8665	0.099436	0.46713
Adcy3	4	-0.05898	0.1214	1.82882	0.14954	0.52219	0.83458	0.98441	0.60154	0.94723	0.20852	0.52676	0.80891	0.98524	0.59836	0.96054	-0.33219	-1.1702	0.26318	0.88048	0.24191	0.99998	-0.45359	-1.1566	0.18311	0.82767	0.24743	0.99996	0.24212	0.84936	0.70947	0.97949	0.39568	0.724	-1.5867	-3.9248	0.010015	0.42827	8.6799e-05	0.012196
Adcy6	4	-0.96354	-0.290516	-0.36639	-0.53535	-1.4676	0.09181	0.72016	0.14222	0.88381	0.42819	0.83144	0.38041	0.92917	0.40573	0.95614	0.014204	0.040247	0.83529	0.98712	0.9679	0.99998	0.30472	0.60757	0.42962	0.93083	0.54348	0.99996	0.44826	1.2599	0.36516	0.90554	0.20769	0.57889	0.81465	1.6128	0.07844	0.7019	0.10679	0.4767
Adcy7	4	0.84179	-0.189128	0.71528	0.4603	1.0724	0.22612	0.83731	0.28355	0.89596	-0.38149	-1.3719	0.17259	0.83472	0.17009	0.95279	-0.18845	-0.43985	0.5471	0.96474	0.66004	0.99998	0.00067833	0.0024682	0.88872	0.99482	0.99803	0.99996	1.0693	2.5013	0.0071679	0.35349	0.012374	0.25276	0.35402	1.2859	0.57201	0.95773	0.19848	0.58562
Adcy9	4	0.16773	-0.480098	-0.05322	0.42283	1.0923	0.2766	0.86475	0.2747	0.89431	0.2551	0.6621	0.70957	0.97595	0.5079	0.95614	-0.085758	-0.22178	0.84363	0.98712	0.82448	0.99998	0.39434	1.0296	0.28443	0.88426	0.30319	0.99996	0.546	1.4117	0.24193	0.86554	0.15805	0.5304	0.59922	1.5627	0.23832	0.86129	0.11813	0.49277
Add1	4	-0.39779	0.196263	-0.5565	-0.14884	-0.61778	0.49098	0.92841	0.53672	0.93854	0.24895	0.88583	0.72254	0.97888	0.37571	0.9549	0.13351	0.56312	0.48513	0.9535	0.57336	0.99998	-0.062753	-0.22574	0.74404	0.9798	0.82141	0.99996	-0.09831	-0.4097	0.66738	0.97332	0.68203	0.88408	0.45819	1.6436	0.40969	0.92288	0.10025	0.46862
Add3	4	-0.09469	0.40117	-0.72932	0.29326	0.99699	0.51065	0.93396	0.31877	0.9093	0.38795	1.1148	0.4501	0.94533	0.26494	0.95279	0.62247	2.1548	0.0059987	0.35952	0.03118	0.99998	0.2213	0.64459	0.59855	0.95815	0.5192	0.99996	-0.91446	-3.0326	0.057699	0.6595	0.0024242	0.10061	-0.18514	-0.53157	0.54527	0.9538	0.59502	0.84508
Adgb	4	0.221927	0.3295	0.411458	0.24224	0.65185	0.62203	0.95625	0.5145	0.93634	0.020313	0.062953	0.7722	0.98142	0.9498	0.994	0.14799	0.40238	0.44756	0.94567	0.68741	0.99998	-0.18151	-0.5745	0.51431	0.9435	0.56563	0.99996	-0.013402	-0.036006	0.8148	0.99003	0.97128	0.99117	-0.42486	-1.3181	0.29561	0.88774	0.18746	0.57323
Adgra2	4	0.06012	-0.42678	-0.189949	-0.25291	-0.66306	0.32713	0.88661	0.50729	0.93634	-0.31303	-0.24881	0.23751	0.89077	0.80351	0.98631	-0.2085	-0.54816	0.49865	0.95449	0.58358	0.99998	0.21828	0.17834	0.60505	0.95815	0.85846	0.99996	0.074081	0.19421	0.96797	0.99906	0.84601	0.94966	0.26403	0.21316	0.72309	0.9741	0.83121	0.94514
Adgrb2	4	-0.43291	0.22081	-0.49064	0.32526	1.2312	0.44116	0.91782	0.21826	0.89431	0.75817	2.0993	0.059682	0.68383	0.035789	0.95279	0.34295	1.2974	0.1155	0.80068	0.19451	0.99998	0.12214	0.33971	0.82639	0.98951	0.73407	0.99996	0.12736	0.48133	0.92964	0.99727	0.63028	0.86153	0.618	1.7159	0.21916	0.8537	0.086185	0.44775
Adgre1	4	-0.03724	0.163135	-0.63553	0.17034	0.43862	0.78562	0.9778	0.66094	0.95592	0.20758	0.34818	0.81114	0.98524	0.7277	0.98024	-0.034545	-0.089655	0.99354	0.9998	0.92856	0.99998	-0.19768	-0.33815	0.48716	0.93879	0.73525	0.99996	0.63097	1.6357	0.15668	0.80786	0.10191	0.46666	1.2665	2.179	0.0021351	0.21538	0.029331	0.3365
Adgre5	4	-0.27582	0.331371	-0.25272	0.36301	1.0532	0.37238	0.89817	0.29223	0.89867	0.63883	1.576	0.12938	0.79906	0.11503	0.95279	0.012111	0.035241	0.84175	0.98712	0.97189	0.99998	-0.31926	-0.79243	0.31152	0.8996	0.42811	0.99996	0.2462	0.71401	0.70195	0.97763	0.47522	0.77533	0.49892	1.2368	0.35601	0.91111	0.21617	0.60252
Adgrf3	4	-0.227472	-0.23181	-0.07817	0.058028	0.22062	0.9425	0.99703	0.82539	0.97908	0.2855	0.94142	0.64257	0.96823	0.34649	0.9542	0.12774	0.49025	0.5013	0.95536	0.62396	0.99998	0.35955	1.1971	0.3375	0.90848	0.23126	0.99996	0.45075	1.7235	0.36078	0.90488	0.084802	0.45	0.52892	1.7554	0.31864	0.89799	0.079183	0.4379
Adgrg1	4	-0.69231	-0.220597	0.02765	0.1549	0.5074	0.82192	0.98287	0.61187	0.94914	0.84721	2.3124	0.032586	0.61487	0.020755	0.95279	0.037693	0.12445	0.76265	0.98162	0.90096	0.99998	0.25829	0.70816	0.52168	0.94594	0.47885	0.99996	-0.29768	-0.97069	0.39383	0.91603	0.3317	0.67641	-0.32533	-0.8845	0.38437	0.91785	0.37643	0.72896
Adgrg6	4	0.077577	0.0938	0.218627	0.047781	0.20676	0.9177	0.99682	0.8362	0.98107	-0.029796	-0.094398	0.6685	0.97002	0.92479	0.99272	-0.21753	-0.94397	0.47781	0.9535	0.34518	0.99998	-0.31133	-0.99391	0.32073	0.90294	0.32027	0.99996	0.25072	1.0866	0.69397	0.9768	0.27723	0.63441	0.032093	0.10217	0.87464	0.9913	0.91862	0.97227
Adgrl1	4	0.270052	-0.19484	1.00681	-0.068478	-0.18658	0.64704	0.95912	0.85199	0.98175	-0.33853	-1.024	0.21122	0.87235	0.30582	0.95279	-0.40515	-1.1131	0.17671	0.8362	0.26565	0.99998	-0.21031	-0.65134	0.46617	0.93643	0.51483	0.99996	0.13272	0.36332	0.91942	0.99678	0.71637	0.89599	-0.87409	-2.6442	0.08083	0.70479	0.0081886	0.2016
Adgrl2	4	-0.25992	-0.850913	0.30012	0.18014	0.42504	0.76387	0.97515	0.67081	0.95661	0.44006	1.0582	0.36175	0.92754	0.28995	0.95279	-0.77358	-1.8239	0.02125	0.5582	0.068161	0.99998	0.077333	0.18697	0.93076	0.9952	0.85168	0.99996	0.80851	1.9212	0.055869	0.65323	0.054708	0.40105	0.50839	1.2273	0.34436	0.90896	0.21972	0.60559
Adh1	4	0.141534	0.104965	-0.445961	0.16419	0.57246	0.80011	0.97953	0.56701	0.94467	0.022656	0.062966	0.778	0.98142	0.94979	0.994	0.061504	0.21532	0.6931	0.97931	0.82952	0.99998	-0.043461	-0.12223	0.78771	0.98569	0.90272	0.99996	0.065719	0.2289	0.95221	0.99814	0.81895	0.93993	0.51168	1.4362	0.3404	0.90809	0.15095	0.53569
Adh4	4	-0.14299	0.519584	-0.44755	0.28992	0.82987	0.51833	0.93603	0.40661	0.92449	0.43291	1.2883	0.37314	0.92863	0.19765	0.95279	0.050664	0.14591	0.72467	0.97931	0.88399	0.99998	-0.46892	-1.4075	0.17162	0.8209	0.15929	0.99996	0.01291	0.036873	0.85939	0.9933	0.97059	0.99099	0.46046	1.3822	0.40593	0.92283	0.1669	0.55199
Adh5	4	-0.83179	-0.44219	0.01296	-0.2928	-0.84931	0.27528	0.86352	0.39571	0.92026	0.53899	1.2939	0.22546	0.88239	0.19569	0.95279	0.11805	0.34778	0.52926	0.96137	0.728	0.99998	0.56024	1.363	0.10589	0.75817	0.17289	0.99996	0.5715	1.6788	0.21605	0.85551	0.093183	0.45839	0.55854	1.3498	0.28173	0.88146	0.17708	0.56333
Adhfe1	4	-0.130072	0.24795	0.64134	0.041768	0.1196	0.90387	0.99485	0.9048	0.98735	0.17184	0.56547	0.89294	0.99076	0.57176	0.95786	-0.26799	-0.78048	0.37182	0.91746	0.43511	0.99998	-0.51594	-1.7333	0.14071	0.80006	0.083044	0.99996	0.46733	1.3574	0.33664	0.89317	0.17464	0.54927	-0.17401	-0.5744	0.5591	0.95517	0.5657	0.83239
Adi1	4	0.358091	-0.21015	-0.49965	0.092541	0.31825	0.97565	0.99735	0.75029	0.97016	-0.26555	-0.8967	0.28824	0.90797	0.36988	0.9542	-0.52335	-1.8291	0.088455	0.7754	0.067381	0.99998	-0.3132	-1.0982	0.31834	0.90285	0.2721	0.99996	-0.81132	-2.7186	0.08144	0.70524	0.0065556	0.18422	-0.31167	-1.0676	0.39881	0.92253	0.2857	0.66691
Adipor1	4	0.84883	-0.34459	0.09996	0.25629	0.74789	0.59321	0.95242	0.45453	0.93471	-0.59254	-1.8038	0.061512	0.68383	0.071262	0.95279	-0.13973	-0.4108	0.68161	0.97931	0.68122	0.99998	0.20486	0.63979	0.63627	0.96234	0.52231	0.99996	0.82795	2.4371	0.047888	0.62484	0.014807	0.27388	0.72799	2.2666	0.12902	0.78923	0.023415	0.31813
Adipor2	4	-0.83292	-0.15272	-0.07804	-0.43423	-1.0993	0.14412	0.77741	0.27163	0.89431	0.39869	1.0328	0.43068	0.94345	0.30168	0.95279	-0.39181	-1.0412	0.19013	0.83942	0.29778	0.99998	-0.23909	-0.63183	0.42072	0.92752	0.5275	0.99996	0.40359	1.0685	0.43007	0.92554	0.28527	0.64272	0.48163	1.2664	0.37685	0.91552	0.20537	0.59137
Adk	4	-0.288357	-0.41022	0.28939	-0.24277	-0.70958	0.34157	0.89029	0.47796	0.93596	0.045587	0.13199	0.8266	0.98647	0.895	0.99163	0.15128	0.44745	0.43785	0.93984	0.65455	0.99998	0.5615	1.6551	0.10508	0.75793	0.097909	0.99996	-0.14227	-0.41653	0.60221	0.96721	0.67702	0.88154	-0.43166	-1.2515	0.28992	0.88554	0.21074	0.59803
Adm	4	0.09842	-0.66114	-0.01798	0.42222	1.2425	0.27792	0.86486	0.21405	0.89431	0.3238	0.93544	0.57003	0.96574	0.34956	0.9542	-0.23185	-0.68176	0.4468	0.94567	0.49539	0.99998	0.42929	1.2457	0.23522	0.86148	0.21288	0.99996	0.10878	0.31961	0.96797	0.99906	0.74926	0.90955	0.12676	0.36709	0.95979	0.99642	0.71355	0.8988
Adnp	4	0.02476	-0.80519	0.390326	0.55797	1.4356	0.12414	0.76326	0.15113	0.88421	0.53321	1.3526	0.23263	0.88801	0.17617	0.95279	-0.43574	-1.1196	0.14804	0.82897	0.26286	0.99998	0.36945	0.94369	0.32301	0.90396	0.34533	0.99996	-0.038004	-0.09718	0.77042	0.98842	0.92258	0.97655	-0.42833	-1.0849	0.29251	0.88554	0.27798	0.66096
Adnp2	4	0.31694	-0.173281	-0.23728	0.11929	0.45571	0.90855	0.99588	0.6486	0.95485	-0.19765	-0.61869	0.37568	0.92898	0.53612	0.95614	-0.07708	-0.29579	0.87022	0.98845	0.76739	0.99998	0.096201	0.30396	0.88638	0.99482	0.76116	0.99996	0.27064	1.0357	0.65823	0.97332	0.30034	0.65351	0.50792	1.6027	0.34528	0.90896	0.10901	0.47949
Ado	4	0.8459	0.45029	0.09571	0.47649	1.6045	0.20589	0.8215	0.1086	0.88163	-0.36941	-1.1851	0.18204	0.8431	0.23599	0.95279	0.16629	0.5629	0.39937	0.92428	0.57351	0.99998	-0.284	-0.93018	0.35748	0.90873	0.35228	0.99996	0.51353	1.7326	0.27711	0.87707	0.08317	0.44802	0.41782	1.3659	0.468	0.93875	0.17196	0.55701
Adora2b	4	-0.23474	-0.68642	-0.63435	-0.01478	-0.052606	0.76575	0.97515	0.95805	0.99432	0.21996	0.64924	0.78344	0.98142	0.51618	0.95614	-0.21739	-0.77532	0.47822	0.9535	0.43815	0.99998	0.46903	1.3946	0.18916	0.83116	0.16313	0.99996	-0.84553	-2.9907	0.072645	0.6947	0.0027834	0.11061	-0.21118	-0.62472	0.51212	0.94671	0.53216	0.81445
Adpgk	4	0.049274	0.0629	0.21725	0.12885	0.49271	0.88511	0.99169	0.62222	0.9507	0.079576	0.24833	0.89879	0.99092	0.80388	0.98631	0.17975	0.69333	0.36882	0.91673	0.4881	0.99998	0.11685	0.37246	0.83743	0.98956	0.70955	0.99996	-0.42374	-1.6115	0.26913	0.87442	0.10707	0.47482	-0.64099	-1.99	0.16374	0.82022	0.046589	0.38993
Adprh	4	-0.05001	-0.119368	0.39741	0.43811	1.8967	0.25454	0.85423	0.057871	0.88163	0.48812	1.329	0.29038	0.90903	0.18384	0.95279	0.061782	0.26935	0.69219	0.97931	0.78766	0.99998	0.18115	0.50375	0.68903	0.97288	0.61444	0.99996	-0.48882	-2.0925	0.21977	0.85658	0.036391	0.36393	-0.88623	-2.367	0.078593	0.7019	0.017935	0.29154
Adprhl1	4	0.05914	0.0428955	-0.201568	0.18805	0.69625	0.74582	0.97378	0.48627	0.93596	0.12891	0.53332	0.99126	0.99923	0.59381	0.95981	-0.0050895	-0.018856	0.89751	0.9923	0.98496	0.99998	-0.047985	-0.20074	0.77663	0.98287	0.8409	0.99996	0.094722	0.35034	0.99517	0.99964	0.72608	0.89887	0.29629	1.235	0.66804	0.96975	0.21682	0.60301
Adprhl2	4	-0.586396	-0.61541	0.10452	-0.081466	-0.24392	0.62157	0.95625	0.80729	0.97709	0.50493	1.3133	0.26791	0.89851	0.18907	0.95279	-0.30843	-0.93148	0.29841	0.89838	0.35161	0.99998	0.30698	0.80981	0.42621	0.92918	0.41805	0.99996	0.49214	1.4866	0.30431	0.88935	0.13711	0.50997	0.38762	1.0143	0.51746	0.94747	0.31046	0.68301
Adprm	4	-0.364728	-0.66814	-0.125	0.078302	0.26383	0.98953	0.9979	0.79191	0.9748	0.44303	1.0919	0.35636	0.92346	0.27488	0.95279	-0.51534	-1.7497	0.092776	0.78744	0.080163	0.99998	0.1528	0.38123	0.75283	0.98009	0.70303	0.99996	0.27574	0.93523	0.64786	0.97305	0.34967	0.68991	0.40074	0.9933	0.49484	0.94614	0.32057	0.68992
Adra1a	4	0.06333	0.561168	-0.28605	-0.59053	-2.116	0.069544	0.68263	0.034341	0.88163	-0.65386	-2.1949	0.044177	0.65604	0.028167	0.95279	0.041818	0.15384	0.7507	0.98159	0.87774	0.99998	-0.51935	-1.8097	0.13838	0.79707	0.070336	0.99996	-0.85489	-3.0566	0.070764	0.69284	0.0022383	0.094687	-0.56884	-1.9432	0.2007	0.84395	0.051988	0.39773
Adrb1	4	-0.211774	0.11748	-0.26996	0.033656	0.087568	0.88516	0.99169	0.93022	0.99143	0.24543	0.51257	0.73011	0.98027	0.60825	0.96214	0.10538	0.2797	0.56332	0.96565	0.77971	0.99998	-0.0121	-0.025856	0.85893	0.99357	0.97937	0.99996	0.75804	2.0042	0.075136	0.69981	0.045047	0.38077	1.028	2.2003	0.018149	0.50997	0.027786	0.33059
Adrb2	4	0.039334	0.08816	-0.09686	-0.084726	-0.36748	0.61502	0.95506	0.71326	0.96395	-0.12406	-0.61244	0.49433	0.95857	0.54025	0.95671	-0.13019	-0.56762	0.70998	0.97931	0.57029	0.99998	-0.21835	-1.099	0.45397	0.93406	0.27178	0.99996	-0.23799	-1.0312	0.46602	0.94205	0.30244	0.65464	-0.14113	-0.7028	0.60226	0.96072	0.48218	0.7888
Adrm1	4	-0.945426	0.90574	0.44221	-0.90257	-1.4966	0.01276	0.43652	0.13449	0.88273	0.042856	0.098687	0.82065	0.98555	0.92139	0.99236	0.47865	0.81865	0.0304	0.61156	0.41299	0.99998	-0.42709	-0.99522	0.20385	0.84439	0.31963	0.99996	0.8748	1.4885	0.034314	0.55831	0.13662	0.50919	0.43259	1.0078	0.44477	0.93192	0.31357	0.68528
Adsl	4	-1.21742	0.19303	1.14484	-0.72956	-1.8119	0.032383	0.57243	0.070003	0.88163	0.48786	1.0362	0.29078	0.90938	0.30013	0.95279	-0.48811	-1.246	0.10859	0.8003	0.21278	0.99998	-0.68114	-1.4571	0.066341	0.68987	0.14509	0.99996	0.14619	0.3715	0.89289	0.99608	0.71027	0.89346	-0.99865	-2.0558	0.056072	0.65351	0.039798	0.37241
Adss	4	1.3055	0.26634	0.83514	-1.0548	-2.4989	0.0055412	0.32635	0.012458	0.71372	-2.3603	-5.1219	0	0	3.0245e-07	0.0059494	-0.13183	-0.31713	0.70495	0.97931	0.75114	0.99998	-0.39817	-0.89426	0.22861	0.85682	0.37118	0.99996	0.29859	0.71544	0.60643	0.96779	0.47434	0.77512	-0.53655	-1.1916	0.21849	0.8537	0.23343	0.61719
Adssl1	4	0.11477	0.45972	0.56994	0.046187	0.097961	0.91429	0.99682	0.92196	0.98992	-0.068583	-0.15208	0.59214	0.96624	0.87912	0.99049	-0.95598	-2.0499	0.0068121	0.37326	0.040374	0.99998	-1.4157	-3.1407	0.002796	0.25	0.0016855	0.28831	-0.20746	-0.4395	0.50796	0.95035	0.6603	0.8755	-0.7774	-1.6744	0.10838	0.75389	0.094052	0.45872
Adtrp	4	0.04422	-0.697768	-0.72381	0.83682	2.307	0.014437	0.45719	0.021055	0.81598	0.7926	1.804	0.04743	0.66406	0.071232	0.95279	-0.057508	-0.1584	0.93229	0.99533	0.87414	0.99998	0.64026	1.4713	0.063342	0.68199	0.1412	0.99996	-0.1409	-0.38551	0.60399	0.96721	0.69986	0.88981	0.58291	1.331	0.2556	0.87201	0.18318	0.56896
Aebp2	4	-0.507722	-0.376675	-0.293643	-0.0018321	-0.0077096	0.79599	0.97881	0.99385	0.99955	0.50589	1.3186	0.26704	0.89851	0.18729	0.95279	0.026415	0.11136	0.79625	0.982	0.91133	0.99998	0.40309	1.0546	0.27075	0.87776	0.29161	0.99996	-0.096943	-0.4075	0.66982	0.97332	0.68364	0.88444	0.1967	0.51358	0.84002	0.98893	0.60754	0.84946
Aen	4	-0.384392	0.41681	1.38391	-0.039662	-0.092923	0.70861	0.96877	0.92596	0.99078	0.34473	0.64795	0.52804	0.96296	0.51702	0.95614	0.25679	0.60799	0.21997	0.86166	0.54319	0.99998	-0.16002	-0.30433	0.55351	0.95013	0.76087	0.99996	0.87175	2.0614	0.035179	0.5649	0.03926	0.36769	-0.51216	-0.95845	0.2342	0.85901	0.33783	0.70145
Afap1	4	0.617062	0.36136	0.638949	0.53072	1.4179	0.14865	0.78116	0.15621	0.88949	-0.086342	-0.35906	0.56083	0.96574	0.71955	0.9792	0.24794	0.66267	0.23395	0.86931	0.50754	0.99998	-0.11342	-0.48008	0.63937	0.96278	0.63117	0.99996	0.68509	1.8303	0.11555	0.75565	0.067206	0.42294	0.046141	0.19373	0.89787	0.99193	0.84639	0.94906
Afap1l1	4	-0.64873	-0.324761	0.13427	-0.11038	-0.28888	0.56382	0.94854	0.77267	0.97371	0.53835	1.2383	0.22617	0.88239	0.21559	0.95279	-0.25436	-0.67601	0.39845	0.92428	0.49903	0.99998	0.070401	0.16477	0.94611	0.99656	0.86913	0.99996	0.51081	1.3562	0.28026	0.87854	0.17504	0.54953	0.37654	0.87217	0.53449	0.94979	0.38312	0.73367
Afdn	4	0.13261	-0.097287	-0.35723	-0.09452	-0.31589	0.59575	0.95293	0.75208	0.97091	-0.22713	-0.76078	0.33516	0.92085	0.44679	0.95614	-0.13305	-0.44617	0.70149	0.97931	0.65548	0.99998	-0.035763	-0.12091	0.80443	0.98669	0.90376	0.99996	-0.12497	-0.41767	0.62813	0.96991	0.67619	0.88115	0.23226	0.78355	0.77779	0.97807	0.4333	0.76281
Aff1	4	-0.145621	-0.02276	-0.03555	-0.18733	-0.57751	0.42718	0.91302	0.5636	0.94401	-0.041709	-0.11678	0.64537	0.96823	0.90703	0.99209	-0.36666	-1.1334	0.2189	0.86077	0.25704	0.99998	-0.3439	-0.96909	0.28255	0.88346	0.3325	0.99996	0.73688	2.2801	0.085252	0.70712	0.0226	0.3146	0.77243	2.178	0.10121	0.74229	0.029409	0.33673
Aff4	4	1.37522	0.4639	0.07926	0.59064	1.5173	0.098877	0.72737	0.12918	0.88207	-0.78458	-2.7661	0.021046	0.53282	0.0056724	0.81827	-0.02793	-0.072244	0.97214	0.99891	0.94241	0.99998	-0.49183	-1.7658	0.15556	0.809	0.077431	0.99996	-0.33015	-0.83489	0.3587	0.90369	0.40378	0.72873	-0.40941	-1.4601	0.30781	0.89474	0.14426	0.52746
Afg1l	4	-0.061848	-0.01488	-0.007463	-0.081003	-0.25397	0.6229	0.95625	0.79952	0.97644	-0.019155	-0.050152	0.68883	0.9735	0.96	0.99495	0.40111	1.2877	0.066748	0.74139	0.19786	0.99998	0.41599	1.1205	0.25296	0.87106	0.26251	0.99996	-0.017466	-0.055017	0.80713	0.99003	0.95612	0.98713	-0.010003	-0.026474	0.80362	0.98247	0.97888	0.99288
Afg3l1	4	-1.062	-0.372364	0.0254	-0.41366	-0.74197	0.15891	0.78919	0.4581	0.93565	0.64834	1.0047	0.12246	0.78653	0.31505	0.95279	-0.084394	-0.15192	0.8479	0.98722	0.87925	0.99998	0.28797	0.4485	0.4622	0.93569	0.65379	0.99996	1.1305	2.0395	0.0042702	0.27632	0.041403	0.37125	1.1051	1.721	0.0098622	0.42827	0.085252	0.44636
Afg3l2	4	-0.82094	-0.463479	-0.6103	-0.09179	-0.25972	0.6018	0.95399	0.79508	0.9756	0.72915	1.1764	0.072391	0.71164	0.23942	0.95279	-0.46358	-1.3323	0.12557	0.80952	0.18277	0.99998	-0.00010098	-0.00016428	0.88674	0.99482	0.99987	1	0.5636	1.6264	0.22348	0.85753	0.10387	0.46886	1.1739	1.9139	0.0048803	0.30769	0.055632	0.40188
Afm	4	-0.627067	0.233591	0.08464	-0.082297	-0.20976	0.61954	0.95622	0.83386	0.98062	0.54477	0.97709	0.21875	0.8767	0.32852	0.95279	0.26131	0.6948	0.21234	0.85583	0.48718	0.99998	0.027719	0.05077	0.95237	0.99656	0.95951	0.99996	0.68212	1.794	0.11814	0.76194	0.07282	0.4326	0.59748	1.086	0.2402	0.8638	0.27747	0.66063
Afmid	4	0.209252	-0.43586	-0.34247	0.28623	1.1007	0.52671	0.93945	0.27103	0.89431	0.076978	0.22871	0.89406	0.99087	0.81909	0.98841	-0.23377	-0.90766	0.44177	0.94241	0.36406	0.99998	0.20209	0.60782	0.64252	0.96278	0.54331	0.99996	0.25112	0.96865	0.69351	0.9768	0.33272	0.67681	0.59359	1.7807	0.24442	0.8665	0.074958	0.43429
Afp	4	-0.209757	0.34439	0.699492	-0.24939	-0.77748	0.33216	0.88889	0.43688	0.92906	-0.039633	-0.13502	0.64898	0.96823	0.89259	0.99126	0.21097	0.66922	0.30436	0.9008	0.50335	0.99998	-0.13342	-0.45777	0.60297	0.95815	0.64712	0.99996	0.064432	0.20234	0.94952	0.99814	0.83965	0.9474	-0.63506	-2.1656	0.1669	0.82322	0.030345	0.34012
Aftph	4	0.39053	-0.46284	0.097436	0.72829	1.3638	0.036348	0.57615	0.17264	0.89157	0.33776	1.0808	0.54222	0.96386	0.27979	0.95279	0.13479	0.25391	0.48193	0.9535	0.79957	0.99998	0.59763	1.9295	0.08388	0.73045	0.053672	0.99996	-0.042024	-0.077935	0.76315	0.98835	0.93788	0.98102	-0.13946	-0.447	0.6047	0.96072	0.65487	0.87263
Aga	4	-0.72007	-0.164	-0.11234	0.18705	0.74476	0.74765	0.97387	0.45642	0.93507	0.90712	1.6345	0.02069	0.52987	0.10215	0.95279	0.30486	1.2174	0.15307	0.83034	0.22344	0.99998	0.46886	0.84685	0.18937	0.83116	0.39708	0.99996	0.10725	0.42667	0.97087	0.99906	0.66962	0.87843	0.21959	0.39579	0.79904	0.98207	0.69226	0.88957
Agap1	4	-0.0686513	0.057929	0.17117	0.0054857	0.020485	0.8146	0.9818	0.98366	0.99804	0.074137	0.22253	0.88821	0.99026	0.8239	0.98896	-0.075501	-0.28271	0.87479	0.98908	0.7774	0.99998	-0.13343	-0.40427	0.60297	0.95815	0.68602	0.99996	-0.76338	-2.8355	0.094505	0.71906	0.0045754	0.15032	-0.93455	-2.7906	0.067358	0.68053	0.0052609	0.15469
Agap3	4	-0.60184	-0.61404	0.071	0.32174	1.2283	0.44919	0.91967	0.21935	0.89431	0.92358	1.656	0.017894	0.50575	0.097727	0.95279	-0.25494	-0.9803	0.39754	0.92428	0.32694	0.99998	0.3591	0.64979	0.33806	0.90848	0.51583	0.99996	0.48684	1.8688	0.31127	0.89053	0.061644	0.411	0.41584	0.74537	0.47135	0.93961	0.45605	0.77446
Agbl3	4	-0.46881	0.0989	0.306894	-0.66792	-1.9508	0.044939	0.60589	0.051082	0.88163	-0.19911	-0.74486	0.374	0.92863	0.45636	0.95614	-0.1294	-0.3928	0.71211	0.97931	0.69447	0.99998	-0.2283	-0.87248	0.43912	0.93406	0.38295	0.99996	0.051284	0.15323	0.92608	0.99678	0.87822	0.96043	-0.25561	-0.96349	0.4587	0.93512	0.3353	0.69945
Agbl5	4	-0.307742	-0.66078	-0.08476	0.0019682	0.0045359	0.8057	0.98055	0.99638	0.9997	0.30971	0.70873	0.59677	0.96624	0.47849	0.95614	-0.23192	-0.54503	0.44665	0.94567	0.58573	0.99998	0.42886	1.0155	0.23583	0.86229	0.30985	0.99996	0.80735	1.9037	0.056022	0.65323	0.056948	0.40468	0.89211	2.0952	0.047634	0.62783	0.03615	0.36079
Ager	4	-0.348742	-1.01881	0.32536	0.049828	0.17082	0.92268	0.99682	0.86437	0.98175	0.39857	0.91478	0.43104	0.94345	0.36031	0.9542	-0.31313	-1.0767	0.29078	0.89433	0.28163	0.99998	0.70568	1.6421	0.037822	0.61134	0.10056	0.99996	0.473	1.6261	0.3281	0.8907	0.10394	0.46904	0.14764	0.3396	0.92476	0.99345	0.73416	0.90773
Agfg1	4	-0.438125	-0.185111	-0.15078	-0.010375	-0.030669	0.77647	0.97685	0.97553	0.99688	0.42775	1.1986	0.38102	0.92955	0.23069	0.95279	0.096059	0.29108	0.58914	0.96787	0.77099	0.99998	0.28117	0.80287	0.47435	0.93724	0.42205	0.99996	-0.87304	-2.5234	0.066748	0.68276	0.011622	0.24583	-0.72226	-1.9893	0.12963	0.78923	0.046668	0.38993
Agfg2	4	-1.17113	-0.30135	0.36314	-0.21485	-0.57939	0.3828	0.90208	0.56233	0.94401	0.95628	1.9867	0.013421	0.45283	0.046951	0.95279	0.11786	0.31956	0.52961	0.96137	0.7493	0.99998	0.41921	0.87277	0.24788	0.86719	0.38279	0.99996	1.0083	2.7361	0.011743	0.39759	0.0062176	0.17829	0.64516	1.3422	0.19211	0.84066	0.17953	0.56622
Aggf1	4	0.21055	-0.04308	0.46204	0.35111	1.3384	0.39378	0.90475	0.18077	0.89313	0.14056	0.44914	0.96635	0.99748	0.65333	0.96604	0.25765	0.9841	0.2186	0.86072	0.32507	0.99998	0.30073	0.97634	0.4379	0.93406	0.3289	0.99996	-0.60816	-2.3046	0.15241	0.80505	0.021188	0.30805	-1.0702	-3.3925	0.044482	0.62067	0.00069259	0.047403
Agk	4	0.4056	-0.02863	0.461261	0.16643	0.35752	0.79477	0.97854	0.7207	0.96512	-0.23917	-0.52491	0.32068	0.9181	0.59965	0.96118	0.37891	0.8185	0.082355	0.77154	0.41307	0.99998	0.40754	0.92604	0.26415	0.87525	0.35443	0.99996	-0.0058092	-0.012457	0.82665	0.99003	0.99006	0.99625	-0.46707	-1.0311	0.2642	0.8761	0.3025	0.67764
Agl	4	0.03842	0.185623	0.7216	0.21309	0.67847	0.68771	0.96586	0.49747	0.93633	0.17467	0.6163	0.88684	0.99026	0.5377	0.95614	-0.046917	-0.15078	0.96823	0.99891	0.88015	0.99998	-0.23254	-0.82992	0.43099	0.93159	0.40658	0.99996	0.26574	0.84872	0.66636	0.97332	0.39604	0.72408	-0.45586	-1.6065	0.27177	0.8772	0.10816	0.47847
Agmo	4	-0.11272	-0.43739	0.13216	0.3255	1.1384	0.4406	0.91782	0.25497	0.89431	0.43822	1.1564	0.36495	0.92762	0.24751	0.95279	-0.23085	-0.80864	0.44899	0.94572	0.41872	0.99998	0.20654	0.54776	0.6323	0.96183	0.58386	0.99996	0.41331	1.447	0.41645	0.92393	0.1479	0.52059	0.28115	0.74398	0.69452	0.97169	0.45689	0.77489
Ago1	4	0.299944	0.26359	0.050219	0.36571	1.0781	0.36831	0.89567	0.28097	0.89545	0.065766	0.24769	0.87001	0.98925	0.80437	0.98655	0.51194	1.5154	0.021351	0.5582	0.12966	0.99998	0.24835	0.94292	0.54197	0.94934	0.34572	0.99996	0.13355	0.39304	0.91785	0.99678	0.69429	0.88806	0.083331	0.31531	0.96157	0.99642	0.75253	0.91609
Ago2	4	-0.22733	0.00798	-0.272094	0.33227	0.34082	0.42667	0.91302	0.73324	0.96742	0.5596	0.52136	0.20273	0.86755	0.60212	0.96201	0.28903	0.30573	0.17228	0.8362	0.75981	0.99998	0.28105	0.27239	0.47491	0.93724	0.78532	0.99996	-0.22822	-0.2317	0.47949	0.94653	0.81677	0.93913	0.043874	0.040796	0.89436	0.99193	0.96746	0.98832
Ago3	4	-0.255874	0.014514	0.11691	0.070476	0.31048	0.97077	0.99703	0.75619	0.97156	0.32635	1.0456	0.56499	0.96574	0.29574	0.95279	-0.065465	-0.29109	0.90753	0.99294	0.77098	0.99998	-0.079979	-0.2586	0.70749	0.97474	0.79594	0.99996	-0.19164	-0.84275	0.52992	0.95493	0.39937	0.72613	-0.30855	-0.98741	0.40313	0.92283	0.32344	0.69218
Ago4	4	0.43866	-0.65141	0.11805	0.12039	0.34892	0.90626	0.99531	0.72715	0.96646	-0.31827	-0.93166	0.23197	0.88781	0.35151	0.9542	-0.27363	-0.79241	0.36023	0.91451	0.42812	0.99998	0.37778	1.1155	0.31005	0.89863	0.26462	0.99996	0.28335	0.82083	0.63403	0.97149	0.41175	0.73319	0.1653	0.487	0.89543	0.99193	0.62626	0.85756
Agpat1	4	0.76422	0.51585	0.26158	-0.10973	-0.25093	0.56494	0.94854	0.80187	0.97651	-0.87395	-1.7615	0.012404	0.44286	0.07815	0.95279	0.10025	0.23401	0.57801	0.96717	0.81497	0.99998	-0.4156	-0.88424	0.21346	0.84848	0.37656	0.99996	0.36623	0.84576	0.49321	0.94765	0.39769	0.72547	0.10465	0.22004	0.99954	0.9999	0.82584	0.943
Agpat2	4	-0.466066	-0.06028	-0.34288	-0.51867	-1.7778	0.097961	0.7258	0.075441	0.88163	-0.052604	-0.13115	0.6233	0.96624	0.89566	0.99163	-0.25622	-0.88527	0.3952	0.92428	0.37601	0.99998	-0.19594	-0.49479	0.49042	0.93879	0.62075	0.99996	0.26691	0.9207	0.66423	0.97332	0.35721	0.69534	0.60979	1.5388	0.22759	0.85579	0.12386	0.50046
Agpat3	4	-0.107465	-0.106701	-0.095619	-0.12559	-0.38676	0.53429	0.94064	0.69893	0.96188	-0.018125	-0.04772	0.69137	0.97432	0.96194	0.99508	-0.012173	-0.038429	0.92049	0.99332	0.96935	0.99998	0.094528	0.25456	0.89035	0.99511	0.79906	0.99996	0.071441	0.2218	0.96294	0.99889	0.82447	0.94186	0.16706	0.44491	0.89284	0.99193	0.65639	0.87336
Agpat4	4	-0.28103	-0.27316	0.127844	-0.679	-3.0717	0.042499	0.59828	0.0021285	0.32457	-0.39797	-1.305	0.15932	0.82111	0.19191	0.95279	-0.07895	-0.368	0.86462	0.98838	0.71287	0.99998	0.19421	0.64542	0.65991	0.9658	0.51865	0.99996	0.079825	0.36772	0.97961	0.99923	0.71308	0.89489	-0.048019	-0.15879	0.74475	0.97561	0.87384	0.95803
Agpat5	4	0.40023	-1.12236	-0.239293	-0.20878	-0.54577	0.39368	0.90475	0.58522	0.94562	-0.60901	-1.1153	0.056987	0.68383	0.26472	0.95279	-0.54339	-1.4452	0.079355	0.76733	0.14839	0.99998	0.57897	1.1254	0.093488	0.73537	0.26041	0.99996	0.054027	0.14281	0.93117	0.99733	0.88644	0.96399	0.29332	0.55822	0.67251	0.96975	0.5767	0.83579
Agps	4	-0.38721	-0.222526	-0.363764	-0.5276	-1.5919	0.094047	0.72071	0.11141	0.88163	-0.14039	-0.36369	0.46668	0.95173	0.71609	0.97813	-0.16385	-0.49658	0.61359	0.97221	0.61948	0.99998	0.058676	0.15459	0.97402	0.99729	0.87714	0.99996	-0.36993	-1.1157	0.31829	0.89053	0.26456	0.62474	-0.0061657	-0.016112	0.80977	0.98276	0.98715	0.99588
Agrn	4	-0.211703	-0.90202	-0.08978	-0.19518	-0.77777	0.41487	0.91151	0.4367	0.92906	0.016523	0.046384	0.76448	0.98142	0.963	0.99508	-0.34562	-1.3854	0.24412	0.87277	0.16592	0.99998	0.5564	1.5843	0.10935	0.76521	0.11313	0.99996	-0.54943	-2.183	0.18235	0.82912	0.029036	0.34202	-0.45965	-1.2917	0.26918	0.8772	0.19645	0.58243
Agt	4	-0.52306	0.00043	-0.49503	0.18436	0.66394	0.754	0.97497	0.50673	0.93634	0.70742	1.5058	0.084134	0.7323	0.13213	0.95279	0.31032	1.1332	0.14676	0.82897	0.25712	0.99998	0.30989	0.66306	0.42108	0.92752	0.50729	0.99996	-0.88501	-3.1352	0.063647	0.6791	0.0017173	0.079861	-0.38998	-0.82758	0.32413	0.90069	0.40791	0.74781
Agtpbp1	4	-0.1863	-0.61369	0.11792	0.24577	0.78268	0.61537	0.95506	0.43381	0.92906	0.43207	1.1981	0.37426	0.92863	0.23089	0.95279	-0.12698	-0.40531	0.71882	0.97931	0.68525	0.99998	0.48671	1.3538	0.16964	0.8189	0.1758	0.99996	0.4058	1.2941	0.42682	0.92396	0.19565	0.57087	0.28788	0.79969	0.68288	0.96997	0.42389	0.75749
Agtrap	4	0.319124	0.18592	0.392797	0.064384	0.16102	0.95643	0.99703	0.87207	0.98187	-0.25474	-0.55283	0.30126	0.91431	0.58038	0.9581	-0.6391	-1.6064	0.044278	0.67311	0.1082	0.99998	-0.82502	-1.8027	0.033399	0.58282	0.071439	0.99996	0.41255	1.0395	0.41767	0.92393	0.29858	0.65184	0.019753	0.043149	0.85466	0.99092	0.96558	0.98769
Agxt	4	-0.479743	0.175684	-0.44895	-0.565	-1.8232	0.078847	0.7041	0.068279	0.88163	-0.085257	-0.25555	0.56301	0.96574	0.7983	0.98631	0.12116	0.39864	0.5198	0.95794	0.69016	0.99998	-0.054524	-0.16803	0.76219	0.98051	0.86656	0.99996	-0.3342	-1.0836	0.35453	0.90204	0.27856	0.63583	0.11475	0.34963	0.98256	0.99881	0.72662	0.90435
Ahctf1	4	-2.13878	-1.04969	0.92453	0.078823	0.084584	0.99065	0.9981	0.93259	0.99143	2.2176	0.74434	0	0	0.45667	0.95614	-0.46097	-0.49158	0.12729	0.81034	0.62302	0.99998	0.58872	0.19672	0.088404	0.73537	0.84404	0.99996	0.6413	0.689	0.14824	0.80115	0.49082	0.78332	-0.28323	-0.09221	0.4286	0.92775	0.92653	0.97522
Ahcy	4	-0.677515	-0.182523	0.29177	0.090245	0.18063	0.9819	0.99774	0.85666	0.98175	0.76776	1.107	0.056377	0.68383	0.26831	0.95279	-0.25196	-0.50271	0.40303	0.92428	0.61517	0.99998	-0.069437	-0.10161	0.72965	0.97766	0.91906	0.99996	0.37891	0.75772	0.47257	0.94517	0.44862	0.75841	0.08714	0.12512	0.96889	0.99759	0.90043	0.9664
Ahcyl1	4	-0.19054	-0.2544	0.300737	-0.17307	-0.83242	0.4499	0.91967	0.40517	0.92429	0.01747	0.081349	0.76676	0.98142	0.93516	0.99328	-0.11732	-0.56796	0.74628	0.98081	0.57006	0.99998	0.13708	0.64076	0.7902	0.98605	0.52168	0.99996	-0.068803	-0.33157	0.71501	0.98001	0.74022	0.90559	-0.36954	-1.7238	0.34233	0.90843	0.084748	0.44602
Ahcyl2	4	-0.4356	-0.36978	0.01612	0.13526	0.48256	0.86981	0.9905	0.62941	0.95221	0.57086	1.5857	0.19048	0.85237	0.11281	0.95279	-0.19904	-0.7114	0.52107	0.95842	0.47683	0.99998	0.17074	0.47547	0.71278	0.97517	0.63445	0.99996	0.7522	2.6904	0.078034	0.7037	0.0071373	0.19259	0.73608	2.0489	0.12333	0.77728	0.040468	0.37411
Ahdc1	4	-0.07262	-0.101957	-0.20983	0.37	1.5024	0.36058	0.89484	0.13298	0.88273	0.44262	1.3621	0.35718	0.92411	0.17318	0.95279	0.027133	0.11037	0.79381	0.982	0.91212	0.99998	0.12909	0.39885	0.80957	0.98669	0.69	0.99996	0.30401	1.2339	0.59789	0.96672	0.21725	0.58733	0.51384	1.5863	0.33725	0.90616	0.11267	0.48594
Ahi1	4	0.1622	0.18919	0.44281	-0.10242	-0.36826	0.57953	0.95072	0.71268	0.96395	-0.26462	-0.80207	0.28931	0.90903	0.42251	0.95614	-0.10809	-0.39839	0.77439	0.982	0.69034	0.99998	-0.29728	-0.92922	0.33964	0.90868	0.35277	0.99996	0.18976	0.69126	0.80713	0.99003	0.4894	0.78256	-0.25305	-0.77574	0.46144	0.93616	0.4379	0.76443
Ahnak	4	-0.129941	-0.019048	-0.05662	-0.20852	-0.92052	0.39408	0.90475	0.3573	0.91246	-0.078579	-0.33054	0.57409	0.96574	0.741	0.98236	0.038958	0.17367	0.75914	0.98162	0.86212	0.99998	0.058006	0.24721	0.97575	0.99778	0.80475	0.99996	-0.18698	-0.82681	0.53602	0.95511	0.40835	0.7311	-0.13036	-0.55129	0.61756	0.96338	0.58143	0.83846
Ahr	4	-0.359697	-0.014396	-0.17678	-0.0060965	-0.014075	0.78674	0.97788	0.98877	0.99877	0.3536	0.67958	0.50938	0.9611	0.49677	0.95614	0.090294	0.2123	0.60541	0.97097	0.83187	0.99998	0.10469	0.20436	0.86696	0.99357	0.83807	0.99996	0.63452	1.4841	0.15388	0.8073	0.13779	0.51085	0.8113	1.579	0.080118	0.70308	0.11433	0.48747
Ahrr	4	-0.56602	-0.65893	-0.234954	-0.75011	-2.9988	0.029841	0.56825	0.0027105	0.35961	-0.18409	-0.63719	0.39673	0.93453	0.524	0.95614	-0.40414	-1.6139	0.17788	0.8362	0.10654	0.99998	0.25479	0.88676	0.52885	0.94687	0.37521	0.99996	-0.053394	-0.21327	0.74333	0.98663	0.83111	0.94446	0.18156	0.63112	0.86625	0.99092	0.52796	0.81277
Ahsa2	4	-0.096144	0.35452	-0.31077	0.030436	0.090024	0.87748	0.9907	0.92827	0.99131	0.12658	0.3047	0.99695	0.9998	0.76059	0.98242	-0.26034	-0.77888	0.3863	0.92198	0.43605	0.99998	-0.61486	-1.4975	0.090489	0.73537	0.13427	0.99996	0.40226	1.2005	0.43257	0.92775	0.22993	0.59757	0.71303	1.7457	0.13873	0.79731	0.080866	0.44059
Ahsg	4	-0.78249	0.157075	0.17864	-0.55661	-1.8289	0.082304	0.70575	0.067416	0.88163	0.22588	0.71092	0.77119	0.98142	0.47713	0.95614	-0.090545	-0.30365	0.82934	0.98712	0.7614	0.99998	-0.24762	-0.78585	0.40725	0.92497	0.43196	0.99996	0.42266	1.4132	0.40181	0.918	0.15759	0.53006	0.24402	0.7721	0.7571	0.97621	0.44005	0.76511
AI182371	4	0.04374	0.15003	-0.005131	-0.3329	-0.86127	0.23146	0.84142	0.38909	0.9183	-0.37664	-1.4789	0.17574	0.83628	0.13916	0.95279	-0.25828	-0.68454	0.39093	0.92428	0.49363	0.99998	-0.40831	-1.6485	0.21982	0.85576	0.099258	0.99996	-0.071008	-0.18541	0.7115	0.97949	0.85291	0.95158	-0.065877	-0.26352	0.71547	0.9729	0.79215	0.93001
AI413582	4	-0.227518	-0.53578	0.07329	-0.074368	-0.28864	0.63647	0.95867	0.77286	0.97371	0.15315	0.50778	0.93691	0.99251	0.6116	0.96217	-0.3884	-1.5195	0.19313	0.84181	0.12865	0.99998	0.14738	0.49804	0.76554	0.98051	0.61845	0.99996	0.29499	1.1524	0.61268	0.96928	0.24915	0.61355	0.2217	0.74212	0.79584	0.98145	0.45801	0.77568
AI467606	4	-0.44286	0.175512	-0.30798	-0.33805	-0.97903	0.22617	0.83731	0.32757	0.91164	0.10481	0.24939	0.95435	0.99392	0.80306	0.98631	0.21099	0.61583	0.30436	0.9008	0.538	0.99998	0.035478	0.08624	0.9695	0.99729	0.93128	0.99996	0.51979	1.5134	0.26974	0.87442	0.13017	0.5026	0.82777	2.0085	0.072899	0.69142	0.044594	0.38575
AI597479	4	0.199836	0.106877	-0.203422	0.014426	0.041514	0.83753	0.98553	0.96689	0.99542	-0.18541	-0.55475	0.39495	0.93453	0.57907	0.9581	0.026367	0.078039	0.7964	0.982	0.9378	0.99998	-0.08051	-0.25026	0.70617	0.97474	0.80239	0.99996	0.050288	0.14582	0.92456	0.99678	0.88406	0.96339	0.25371	0.77884	0.74013	0.97483	0.43607	0.76396
AI837181	4	0.9028	-0.93478	-0.55598	0.3426	0.80013	0.4073	0.90767	0.42364	0.92893	-0.5602	-1.3907	0.073103	0.71379	0.16433	0.95279	-0.58998	-1.3759	0.059428	0.71411	0.16885	0.99998	0.3448	0.87615	0.36119	0.90873	0.38095	0.99996	-0.26096	-0.60567	0.43663	0.92985	0.54474	0.81481	0.29502	0.7441	0.66956	0.96975	0.45682	0.77489
AI987944	4	-0.042886	0.63242	0.169125	0.01533	0.033771	0.83981	0.9865	0.97306	0.99688	0.058216	0.14756	0.85405	0.98887	0.88269	0.99049	0.49289	1.1282	0.026028	0.58514	0.25925	0.99998	-0.13953	-0.3633	0.59128	0.95602	0.71638	0.99996	-0.011585	-0.025649	0.81785	0.99003	0.97954	0.99309	-0.18071	-0.46069	0.5501	0.95412	0.64502	0.8687
Aicda	4	-0.154552	-0.275807	0.151831	0.024228	0.077256	0.86188	0.99007	0.93842	0.9919	0.17878	0.44783	0.8783	0.98925	0.65427	0.96604	-0.0069073	-0.022364	0.90372	0.99294	0.98216	0.99998	0.2689	0.68805	0.50028	0.94109	0.49142	0.99996	0.080044	0.25615	0.98007	0.99923	0.79784	0.93081	-0.071787	-0.18068	0.70596	0.97169	0.85662	0.95237
Aida	4	0.50058	-0.55688	-0.20115	0.1293	0.43603	0.88409	0.99139	0.66282	0.95592	-0.37128	-0.99831	0.18052	0.84023	0.31813	0.95279	-0.11906	-0.4065	0.74145	0.98074	0.68437	0.99998	0.43782	1.2214	0.22414	0.85623	0.22193	0.99996	0.22162	0.751	0.74877	0.98756	0.45265	0.76104	0.42277	1.168	0.45961	0.93566	0.24282	0.62718
Aif1	4	-0.0917825	-0.376919	-0.766083	-0.0069955	-0.022903	0.78451	0.9778	0.98173	0.99777	0.084787	0.2128	0.9117	0.99227	0.83148	0.98896	-0.37754	-1.2343	0.20614	0.85153	0.21708	0.99998	-0.00062058	-0.0015675	0.88557	0.99482	0.99875	0.99996	-0.027833	-0.091006	0.78756	0.98842	0.92749	0.97834	0.73825	1.8642	0.1213	0.77117	0.062299	0.41401
Aif1l	4	0.5679	-0.595066	-0.2523	0.28765	0.77865	0.52331	0.93781	0.43619	0.92906	-0.28025	-0.74928	0.27147	0.89944	0.45369	0.95614	-0.071156	-0.19281	0.88872	0.99078	0.84711	0.99998	0.52391	1.4093	0.13456	0.79228	0.15876	0.99996	-0.39022	-1.051	0.29887	0.88738	0.29327	0.6482	-0.13792	-0.37045	0.60688	0.96096	0.71105	0.8977
Aifm1	4	0.244947	-0.38359	-0.16871	-0.028733	-0.09981	0.73479	0.97302	0.9205	0.98962	-0.27368	-0.85592	0.27929	0.90218	0.39204	0.95614	-0.12843	-0.45399	0.71461	0.97931	0.64984	0.99998	0.25516	0.82283	0.52809	0.94687	0.4106	0.99996	0.59378	2.0952	0.19114	0.83333	0.036157	0.36307	0.76249	2.4518	0.10747	0.75374	0.014215	0.2643
Aifm2	4	0.24527	0.80685	-0.6016	0.1051	0.37093	0.94357	0.99703	0.71069	0.9634	-0.14017	-0.48928	0.46703	0.95173	0.62465	0.96413	0.25099	0.89882	0.22866	0.86728	0.36875	0.99998	-0.55586	-1.9731	0.11774	0.77607	0.048487	0.9868	-0.44123	-1.5459	0.25484	0.87176	0.12213	0.49433	0.16037	0.56764	0.90219	0.99213	0.57028	0.83453
Aim2	4	0.212547	0.09018	-0.09683	0.12714	0.38541	0.88887	0.99206	0.69994	0.96197	-0.085407	-0.21598	0.56276	0.96574	0.829	0.98896	-0.14959	-0.4551	0.65375	0.97701	0.64904	0.99998	-0.23977	-0.61308	0.41965	0.92752	0.53982	0.99996	-0.37372	-1.1289	0.31417	0.89053	0.25895	0.62034	-0.27689	-0.70299	0.43536	0.93006	0.48206	0.7888
Aimp1	4	-0.578973	0.61608	-0.04144	-0.075273	-0.20233	0.6352	0.95867	0.83966	0.98118	0.5037	1.294	0.26913	0.89851	0.19568	0.95279	0.31704	0.86673	0.13894	0.81732	0.38609	0.99998	-0.29904	-0.77349	0.3373	0.90848	0.43923	0.99996	-0.17252	-0.46372	0.55671	0.95896	0.64285	0.8667	-0.13108	-0.33651	0.6169	0.96338	0.73649	0.90865
Aimp2	4	-0.120449	-0.180999	0.30658	-0.038564	-0.092764	0.7115	0.96877	0.92609	0.99078	0.081885	0.20779	0.90453	0.9917	0.83539	0.98896	-0.23869	-0.58458	0.4315	0.93756	0.55883	0.99998	-0.057691	-0.15029	0.75558	0.98009	0.88054	0.99996	-0.34305	-0.82288	0.34614	0.89801	0.41057	0.73246	-0.64963	-1.6398	0.16029	0.81919	0.10104	0.46901
Aip	4	0.321312	-0.90005	-0.299376	0.29366	0.77264	0.50953	0.93396	0.43973	0.93084	-0.027652	-0.082528	0.67267	0.97002	0.93423	0.99328	-0.2164	-0.57712	0.48056	0.9535	0.56386	0.99998	0.68365	2.079	0.046058	0.63706	0.037621	0.96469	-0.2863	-0.74554	0.40745	0.92222	0.45595	0.7628	0.013076	0.039334	0.84322	0.98974	0.96862	0.98861
Aipl1	4	0.398241	0.10624	-0.44372	0.47546	1.569	0.20741	0.82232	0.11665	0.88163	0.077219	0.25985	0.89451	0.99092	0.79498	0.98631	0.25812	0.85291	0.21809	0.86072	0.39371	0.99998	0.15188	0.51443	0.75522	0.98009	0.60695	0.99996	0.1236	0.40715	0.93752	0.99778	0.6839	0.88449	0.56732	1.9198	0.27208	0.8772	0.054886	0.40106
Ajm1	4	-0.31329	-0.233533	-0.465282	-0.17525	-0.56305	0.44629	0.91967	0.5734	0.94467	0.13804	0.40115	0.97189	0.99823	0.68831	0.97399	0.084437	0.27393	0.62381	0.97283	0.78414	0.99998	0.31797	0.94243	0.4071	0.92497	0.34597	0.99996	-0.070242	-0.226	0.71272	0.98001	0.8212	0.94055	0.39504	1.1611	0.5045	0.94671	0.24559	0.62928
Ajuba	4	-0.31151	-0.353202	0.116803	-0.1146	-0.44052	0.55564	0.94558	0.65956	0.95592	0.19691	0.59881	0.83651	0.9877	0.5493	0.95697	-0.31071	-1.2129	0.29526	0.8978	0.22515	0.99998	0.042492	0.13236	0.98612	0.99815	0.8947	0.99996	-0.0025967	-0.010042	0.83188	0.99063	0.99199	0.99716	-0.1194	-0.36449	0.63423	0.96839	0.71549	0.89944
Ak1	4	0.58811	0.19523	0.11903	0.47538	0.88996	0.20751	0.82232	0.37349	0.91292	-0.11273	-0.25033	0.5137	0.96296	0.80233	0.98631	0.3328	0.6235	0.12424	0.80952	0.53296	0.99998	0.13757	0.30918	0.78908	0.98605	0.75718	0.99996	0.8278	1.5505	0.047888	0.62484	0.12102	0.49277	0.70877	1.5909	0.14188	0.79847	0.11163	0.48438
Ak2	4	1.12194	0.45166	-1.05147	0.48545	0.82443	0.19745	0.82037	0.4097	0.92527	-0.63649	-0.72172	0.048549	0.67015	0.47047	0.95614	0.6195	1.0653	0.006202	0.3631	0.28673	0.99998	0.16784	0.19586	0.71796	0.97568	0.84472	0.99996	-1.9479	-3.2346	0.0019826	0.19307	0.0012182	0.062353	-0.89643	-1.0229	0.076204	0.69698	0.30638	0.68068
Ak3	4	-0.4539	0.0548	-0.371595	-0.18259	-0.52876	0.43399	0.91495	0.59697	0.94671	0.27131	0.65814	0.67495	0.97012	0.51045	0.95614	0.13296	0.38896	0.4863	0.95364	0.69731	0.99998	0.07816	0.19148	0.92878	0.9952	0.84815	0.99996	-0.37536	-1.0854	0.31295	0.89053	0.27776	0.63502	-0.0037649	-0.0091597	0.81328	0.98276	0.99269	0.99788
Ak4	4	0.59403	0.651879	0.48709	-0.50017	-1.4665	0.1064	0.74284	0.14251	0.88381	-1.0942	-2.9474	0.0024401	0.19433	0.0032048	0.62705	0.046359	0.13938	0.73809	0.98048	0.88915	0.99998	-0.60552	-1.652	0.093335	0.73537	0.098531	0.99996	-0.29967	-0.885	0.3918	0.91532	0.37616	0.70873	-0.78676	-2.1365	0.10533	0.74721	0.032641	0.34925
Ak8	4	0.185896	-0.059963	0.144272	0.087622	0.24569	0.98785	0.99774	0.80593	0.97691	-0.098274	-0.28376	0.53861	0.96345	0.77659	0.98434	-0.014121	-0.040389	0.92725	0.99444	0.96778	0.99998	0.045842	0.13727	0.99492	0.99862	0.89082	0.99996	0.23247	0.65711	0.72701	0.98309	0.51111	0.79395	0.088198	0.25922	0.97072	0.99822	0.79546	0.93089
Akap1	4	-0.942305	0.142218	-0.05098	-0.86704	-3.0065	0.015454	0.46061	0.0026424	0.35602	0.075265	0.25619	0.89004	0.99056	0.7978	0.98631	0.017618	0.061643	0.82416	0.98679	0.95085	0.99998	-0.1246	-0.43289	0.61883	0.96132	0.66509	0.99996	-0.20668	-0.71947	0.50897	0.95035	0.47185	0.77387	-0.1557	-0.53275	0.58152	0.9582	0.59421	0.84486
Akap10	4	0.452463	0.48324	0.6665	0.411	1.025	0.29663	0.87376	0.30535	0.90393	-0.041463	-0.11433	0.64582	0.96823	0.90897	0.99209	0.1027	0.25971	0.57048	0.96652	0.79509	0.99998	-0.38054	-1.102	0.2461	0.86665	0.27047	0.99996	0.36594	0.91553	0.49377	0.94766	0.35991	0.6967	-0.30056	-0.8364	0.41132	0.92288	0.40293	0.74536
Akap11	4	0.691479	-0.77411	-0.43748	-0.099171	-0.29316	0.58563	0.95202	0.7694	0.97371	-0.79065	-1.9496	0.020385	0.5288	0.051226	0.95279	-0.12814	-0.38082	0.71532	0.97931	0.70333	0.99998	0.64597	1.6619	0.060088	0.67083	0.096531	0.99996	-0.27551	-0.81301	0.42052	0.92396	0.41621	0.73526	0.16197	0.41121	0.90001	0.99205	0.68092	0.88547
Akap12	4	-0.68654	0.15585	-0.520827	-0.28458	-0.98887	0.28433	0.86585	0.32273	0.91079	0.40196	1.2407	0.42413	0.93974	0.21472	0.95279	-0.34818	-1.2161	0.24086	0.87223	0.22393	0.99998	-0.50403	-1.5594	0.14804	0.80087	0.1189	0.99996	0.092563	0.32261	0.99878	0.99985	0.74699	0.90859	0.61339	1.8991	0.22368	0.85462	0.057552	0.40437
Akap13	4	0.448176	-0.345519	-0.24399	0.39264	1.4127	0.32576	0.88634	0.15774	0.88954	-0.055536	-0.18338	0.61771	0.96624	0.8545	0.98937	0.00017133	0.00061968	0.87942	0.98971	0.99951	0.99998	0.34569	1.1594	0.35992	0.90873	0.2463	0.99996	0.21005	0.75539	0.77063	0.98842	0.45002	0.75945	0.45404	1.5168	0.41472	0.92342	0.12931	0.50829
Akap17b	4	0.276817	0.65546	-0.04552	0.26076	0.7862	0.58274	0.95114	0.43175	0.92906	-0.016057	-0.053157	0.69534	0.97453	0.95761	0.99454	0.39078	1.1889	0.074068	0.75621	0.23449	0.99998	-0.26468	-0.89859	0.38407	0.91802	0.36887	0.99996	-0.27833	-0.83504	0.41726	0.92393	0.40369	0.72873	-0.23281	-0.77566	0.48706	0.94368	0.43795	0.76443
Akap3	4	-0.185921	-0.37299	0.64764	-0.23384	-1.2592	0.3556	0.89382	0.20794	0.89431	-0.047919	-0.20645	0.63266	0.96624	0.83644	0.98896	-0.07344	-0.39632	0.88181	0.98999	0.69187	0.99998	0.29955	1.2975	0.44024	0.93406	0.19448	0.99996	-0.27414	-1.4746	0.42209	0.92396	0.14032	0.51248	-0.92178	-3.9745	0.070256	0.68676	7.0519e-05	0.010352
Akap5	4	0.2446	-0.614132	0.01049	0.39955	1.6708	0.31463	0.87892	0.094765	0.88163	0.15495	0.6176	0.93259	0.99251	0.53684	0.95614	-0.094102	-0.39337	0.81745	0.98445	0.69405	0.99998	0.52003	2.0847	0.13772	0.7963	0.0371	0.96469	0.28784	1.2029	0.62554	0.96991	0.22903	0.59687	0.27735	1.1094	0.70037	0.97169	0.26726	0.65098
Akap6	4	0.4865	-0.80011	0.21815	0.71166	2.1659	0.041381	0.59157	0.030321	0.88163	0.22516	0.51379	0.77246	0.98142	0.6074	0.96214	-0.13435	-0.41039	0.69788	0.97931	0.68152	0.99998	0.66576	1.567	0.052514	0.65037	0.11711	0.99996	0.44291	1.3461	0.37197	0.90888	0.17828	0.55255	0.22476	0.51872	0.79106	0.98075	0.60396	0.84864
Akap7	4	0.12687	-0.02919	-0.221741	0.029175	0.11366	0.87515	0.99056	0.9095	0.98809	-0.097695	-0.36525	0.53927	0.96345	0.71493	0.97813	0.3097	1.2074	0.14753	0.82897	0.22729	0.99998	0.33889	1.2799	0.37121	0.91321	0.20058	0.99996	0.022499	0.087549	0.87698	0.99535	0.93023	0.97864	0.24424	0.91944	0.75685	0.97621	0.35786	0.71462
Akap8l	4	-0.269209	-0.052313	-0.232229	0.063161	0.19541	0.95435	0.99703	0.84507	0.98147	0.33237	0.88025	0.55396	0.96468	0.37872	0.95614	-0.13289	-0.41178	0.70185	0.97931	0.6805	0.99998	-0.080577	-0.21411	0.70606	0.97474	0.83046	0.99996	-0.0022087	-0.0068262	0.83249	0.99063	0.99455	0.99826	0.23002	0.61089	0.78145	0.97898	0.54127	0.81963
Akap9	4	-0.378687	-0.40012	0.4694	-0.45612	-1.328	0.13019	0.76654	0.18416	0.89431	-0.077433	-0.1901	0.57709	0.96574	0.84923	0.98918	-0.14894	-0.45166	0.65513	0.97701	0.65151	0.99998	0.25118	0.64885	0.53653	0.94934	0.51643	0.99996	0.33888	1.0177	0.53648	0.95511	0.30882	0.65778	-0.13052	-0.32537	0.61751	0.96338	0.7449	0.91373
Akip1	4	0.00796	0.316003	0.50711	-0.21395	-0.63334	0.38447	0.90208	0.52651	0.93821	-0.22191	-0.51353	0.34142	0.92106	0.60758	0.96214	0.096003	0.29722	0.58945	0.96787	0.7663	0.99998	-0.22	-0.55135	0.45173	0.93406	0.58139	0.99996	0.24688	0.75119	0.70068	0.97763	0.45254	0.76097	-0.26023	-0.61965	0.45397	0.93413	0.53549	0.8165
Akirin1	4	-0.183249	0.58358	-0.0248	-0.27061	-0.70614	0.30258	0.87605	0.4801	0.93596	-0.087361	-0.20036	0.55869	0.96574	0.8412	0.98896	-0.93052	-2.4773	0.0082863	0.41371	0.013237	0.99998	-1.5141	-3.4695	0.0017284	0.19318	0.0005214	0.14652	0.19015	0.51016	0.80662	0.99003	0.60994	0.84912	0.21495	0.50018	0.80733	0.98276	0.61695	0.85305
Akirin2	4	-0.98466	0.470748	0.016087	-0.45358	-0.9399	0.13207	0.76909	0.34727	0.91238	0.53108	0.68719	0.23532	0.89066	0.49197	0.95614	0.097038	0.21332	0.58599	0.96717	0.83107	0.99998	-0.37371	-0.4927	0.25276	0.87106	0.62222	0.99996	-0.093113	-0.19667	0.67648	0.97394	0.84408	0.94902	-0.1092	-0.13998	0.64979	0.96839	0.88868	0.96246
Akr1a1	4	0.16077	0.46717	0.37734	0.26798	0.5659	0.56703	0.9492	0.57146	0.94467	0.10721	0.30967	0.95943	0.99525	0.75681	0.98238	0.22774	0.48236	0.27106	0.88542	0.62955	0.99998	-0.23943	-0.69683	0.42016	0.92752	0.48591	0.99996	0.78527	1.6623	0.064257	0.6791	0.096458	0.46243	0.40793	1.186	0.48391	0.94368	0.23561	0.61825
Akr1b10	4	-0.218557	0.577949	-0.33296	0.0075834	0.026379	0.81963	0.98287	0.97896	0.99688	0.22614	0.58714	0.77083	0.98142	0.55711	0.95697	0.022569	0.079488	0.8087	0.98246	0.93664	0.99998	-0.55538	-1.4501	0.11789	0.77607	0.14704	0.99996	0.60813	2.1362	0.17793	0.82912	0.032663	0.35251	0.94109	2.4651	0.034264	0.59318	0.013696	0.26066
Akr1b3	4	0.31505	0.15781	0.05565	0.14337	0.35585	0.84983	0.98765	0.72195	0.96512	-0.17168	-0.45045	0.41609	0.93813	0.65238	0.96604	0.34631	0.86676	0.1123	0.80068	0.38607	0.99998	0.1885	0.5023	0.67251	0.96927	0.61546	0.99996	0.38582	0.95894	0.46042	0.94007	0.33759	0.67957	0.33017	0.8735	0.61202	0.96297	0.38239	0.73321
Akr1b7	4	-0.14878	-0.75449	-0.098247	0.21979	0.71537	0.67078	0.96138	0.47438	0.93596	0.36857	0.86564	0.48223	0.95529	0.38669	0.95614	-0.1336	-0.43653	0.69986	0.97931	0.66246	0.99998	0.62089	1.4657	0.071679	0.70219	0.14274	0.99996	-0.13808	-0.44833	0.60871	0.96833	0.65392	0.8717	-0.039833	-0.093693	0.75802	0.97662	0.92535	0.97491
Akr1b8	4	-0.271442	0.01667	-0.11772	-0.17911	-0.83758	0.43953	0.91771	0.40227	0.9239	0.092332	0.39565	0.92685	0.99251	0.69237	0.97444	-0.38402	-1.8273	0.19877	0.84504	0.067649	0.99998	-0.40069	-1.747	0.22653	0.85682	0.080635	0.99996	-0.2845	-1.3337	0.40959	0.92393	0.18231	0.55643	-0.16678	-0.71793	0.56784	0.95604	0.4728	0.78439
Akr1c13	4	-1.15977	-0.62383	-0.05448	-0.82913	-2.8838	0.019318	0.50375	0.0039291	0.43288	0.33064	1.1829	0.55742	0.96574	0.23684	0.95279	-0.1359	-0.49221	0.69239	0.97931	0.62257	0.99998	0.48793	1.7712	0.16847	0.81794	0.076536	0.99996	0.2227	0.79811	0.74643	0.98663	0.42481	0.74187	0.27718	0.99738	0.70073	0.97169	0.31858	0.68782
Akr1c14	4	0.76302	-0.131177	-0.27923	0.65247	0.7005	0.064765	0.6723	0.48362	0.93596	-0.11055	-0.21868	0.51731	0.96296	0.8269	0.98896	0.074143	0.081404	0.65497	0.97701	0.93512	0.99998	0.20532	0.43499	0.63525	0.96234	0.66357	0.99996	0.34433	0.36821	0.52753	0.95379	0.71271	0.89475	0.62356	1.2986	0.21229	0.84913	0.19408	0.58061
Akr1c6	4	-0.65858	-0.59307	-0.21165	-0.41863	-1.7754	0.1551	0.78594	0.075827	0.88163	0.23995	0.89191	0.74201	0.98142	0.37244	0.9542	-0.29292	-1.2545	0.32586	0.90999	0.20965	0.99998	0.30015	1.1285	0.43897	0.93406	0.25913	0.99996	-0.53222	-2.2559	0.19231	0.83399	0.024075	0.32283	-0.32057	-1.1912	0.38946	0.92146	0.23357	0.61724
Akr1d1	4	-0.812679	1.09923	-0.376866	0.097941	0.37584	0.96197	0.99703	0.70704	0.96284	0.91062	1.8406	0.019877	0.52767	0.06568	0.95279	0.19599	0.75378	0.3346	0.91261	0.45098	0.99998	-0.90324	-1.8162	0.023588	0.52781	0.069332	0.99996	0.033634	0.12894	0.89594	0.99608	0.89741	0.9676	0.4105	0.82953	0.47959	0.94274	0.4068	0.74765
Akr1e1	4	-1.43284	0.470127	-0.21854	-0.76495	-2.9806	0.027045	0.54341	0.0028769	0.36541	0.66789	1.8457	0.10915	0.76871	0.064934	0.95279	0.079197	0.31284	0.63911	0.97442	0.7544	0.99998	-0.39093	-1.0821	0.23471	0.86026	0.2792	0.99996	-0.86278	-3.3575	0.069188	0.69048	0.00078664	0.047778	-0.64424	-1.7753	0.16222	0.81934	0.075856	0.43574
Akr7a5	4	-0.239548	0.30762	0.50313	0.0091019	0.027925	0.82273	0.98287	0.97772	0.99688	0.24865	0.85617	0.7232	0.97888	0.3919	0.95614	-0.11471	-0.3536	0.75421	0.98162	0.72364	0.99998	-0.42233	-1.4659	0.20843	0.848	0.14267	0.99996	0.63644	1.962	0.1522	0.80494	0.049758	0.38947	0.13331	0.46126	0.94901	0.9964	0.64461	0.86838
Akt1	4	-0.41623	0.160629	0.51818	-0.24144	-0.64407	0.34335	0.89166	0.51953	0.93708	0.17479	0.64615	0.88664	0.99026	0.51818	0.95614	0.12099	0.33011	0.52005	0.95822	0.74132	0.99998	-0.039639	-0.14961	0.79635	0.98669	0.88107	0.99996	0.64165	1.7431	0.14783	0.80088	0.081317	0.44554	0.12347	0.46004	0.96594	0.99758	0.64549	0.86875
Akt1s1	4	-1.05049	-0.422728	0.24946	-0.42659	-1.2139	0.14961	0.78279	0.22478	0.89431	0.6239	0.98612	0.14214	0.81415	0.32407	0.95279	-0.47548	-1.3899	0.11697	0.80068	0.16455	0.99998	-0.052752	-0.084521	0.76615	0.98051	0.93264	0.99996	0.48574	1.4232	0.31244	0.89053	0.15468	0.52798	0.23628	0.37408	0.77103	0.97757	0.70835	0.89675
Akt2	4	-0.313479	0.591227	-0.05765	-0.29232	-1.1622	0.27574	0.86438	0.24514	0.89431	0.021159	0.070845	0.77388	0.98142	0.94352	0.99372	-0.090913	-0.363	0.82838	0.98712	0.7166	0.99998	-0.68214	-2.2933	0.065985	0.68978	0.021828	0.88002	0.29063	1.1588	0.62061	0.96991	0.24654	0.61204	0.34828	1.1718	0.58141	0.9582	0.2413	0.62523
Akt3	4	0.59352	0.80715	0.47864	0.29217	0.93804	0.51324	0.93447	0.34822	0.91246	-0.30135	-0.86844	0.2493	0.89718	0.38515	0.95614	0.39922	1.287	0.068171	0.74916	0.19809	0.99998	-0.40793	-1.2047	0.22027	0.85605	0.22831	0.99996	-0.35296	-1.128	0.33516	0.89255	0.25932	0.6208	-0.8316	-2.3943	0.092064	0.72556	0.016654	0.28454
Aktip	4	0.29048	0.57718	0.05458	0.56846	1.6735	0.11647	0.75344	0.094221	0.88163	0.27798	0.90442	0.6595	0.96976	0.36577	0.9542	0.37994	1.1234	0.081135	0.76779	0.26125	0.99998	-0.19724	-0.65244	0.48782	0.93879	0.51412	0.99996	0.17754	0.52119	0.82934	0.99047	0.60224	0.84519	0.12296	0.40265	0.96696	0.99759	0.68721	0.88726
Alad	4	0.08895	-0.5357	-0.55127	0.21679	0.86216	0.67836	0.9643	0.3886	0.9183	0.12784	0.37265	0.99395	0.9998	0.70941	0.97813	-0.11853	-0.47466	0.74307	0.98074	0.63503	0.99998	0.41717	1.2264	0.25083	0.87004	0.22004	0.99996	0.25232	1.006	0.69092	0.9768	0.31442	0.66249	0.80359	2.3595	0.084134	0.70976	0.018299	0.29232
Alas1	4	-0.09485	-0.76434	-0.53343	0.23095	0.94919	0.64603	0.95912	0.34252	0.91192	0.3258	0.61912	0.56606	0.96574	0.53584	0.95614	-0.3253	-1.3512	0.27284	0.88792	0.17662	0.99998	0.43904	0.8553	0.22236	0.85623	0.39239	0.99996	0.16265	0.67055	0.85995	0.99336	0.50251	0.78861	0.69608	1.3444	0.15088	0.8095	0.17881	0.56542
Alb	4	0.59385	-0.795974	0.42828	0.79238	1.6568	0.022114	0.51225	0.09756	0.88163	0.19853	0.59047	0.83153	0.98727	0.55487	0.95697	-0.71853	-1.4923	0.027604	0.5915	0.13563	0.99998	0.077444	0.23255	0.93051	0.9952	0.81611	0.99996	-0.15821	-0.32815	0.57811	0.96309	0.7428	0.90679	-0.58649	-1.7434	0.19186	0.84057	0.081266	0.44157
Alcam	4	-0.09954	-1.19375	-0.318136	0.34921	1.0596	0.39642	0.90475	0.28934	0.89715	0.44875	1.0692	0.34828	0.92115	0.285	0.95279	-0.33763	-1.0281	0.25479	0.87753	0.30392	0.99998	0.85612	2.0565	0.0099131	0.39	0.039735	0.96469	-0.0081155	-0.024537	0.82339	0.99003	0.98042	0.99339	0.31002	0.74135	0.64516	0.96839	0.45848	0.77594
Aldh16a1	4	0.69763	0.474426	-0.06057	0.54247	1.7856	0.13817	0.77469	0.074171	0.88163	-0.15516	-0.54088	0.44273	0.94508	0.58859	0.95939	-0.0025837	-0.0086304	0.88841	0.99078	0.99311	0.99998	-0.47701	-1.7052	0.16537	0.8159	0.08816	0.99996	0.22486	0.73784	0.74241	0.98662	0.46061	0.76604	0.28543	1.0165	0.68665	0.97021	0.30941	0.68227
Aldh18a1	4	0.35809	-0.42283	0.47547	0.741	1.9975	0.033298	0.57243	0.045767	0.88163	0.38291	0.87494	0.45768	0.9473	0.38161	0.95614	0.1586	0.42846	0.41777	0.93217	0.66832	0.99998	0.58143	1.3752	0.092115	0.73537	0.16906	0.99996	0.4964	1.336	0.29836	0.88723	0.18156	0.55592	0.02093	0.047976	0.85674	0.99092	0.96174	0.98672
Aldh1a1	4	-0.3265	0.074448	0.04116	0.14144	0.59766	0.85466	0.98785	0.55007	0.9417	0.46794	1.7659	0.31829	0.9179	0.077406	0.95279	-0.033752	-0.14263	0.99105	0.9998	0.88658	0.99998	-0.1082	-0.40977	0.64857	0.96316	0.68197	0.99996	0.30192	1.2753	0.60139	0.96721	0.20221	0.5745	0.26076	0.98623	0.72823	0.97483	0.32402	0.69218
Aldh1a3	4	-0.439823	0.202994	0.32863	0.023477	0.082493	0.85979	0.98906	0.93425	0.99143	0.4633	1.2242	0.32611	0.91893	0.22086	0.95279	0.12817	0.46315	0.50003	0.95514	0.64326	0.99998	-0.074824	-0.20081	0.71882	0.97568	0.84085	0.99996	-0.18186	-0.63889	0.54324	0.95551	0.52289	0.80077	-0.51049	-1.3346	0.23527	0.85934	0.18201	0.56849
Aldh1a7	4	-0.248114	-0.061034	0.22763	-0.18662	-0.78946	0.42804	0.91366	0.42985	0.92906	0.061494	0.23739	0.86056	0.98887	0.81236	0.98818	-0.081299	-0.34501	0.85669	0.98764	0.73009	0.99998	-0.020265	-0.079163	0.83956	0.98975	0.9369	0.99996	-0.44237	-1.8684	0.25423	0.87095	0.0617	0.411	-0.67	-2.5766	0.15088	0.8095	0.0099776	0.22257
Aldh1b1	4	-0.547104	-0.226172	0.366832	0.059566	0.20201	0.94611	0.99703	0.83991	0.98118	0.60667	1.8902	0.1553	0.81467	0.058738	0.95279	0.022758	0.077295	0.80799	0.98246	0.93839	0.99998	0.24893	0.77898	0.54095	0.94934	0.43599	0.99996	0.39935	1.3553	0.43714	0.9302	0.17533	0.54961	0.032518	0.10137	0.87525	0.99159	0.91926	0.97227
Aldh1l1	4	0.50329	-0.265676	-1.26242	0.40255	1.0073	0.30893	0.87606	0.3138	0.90732	-0.10074	-0.24026	0.53403	0.96345	0.81013	0.98772	-0.19192	-0.48392	0.53922	0.96349	0.62844	0.99998	0.073756	0.18118	0.93823	0.9952	0.85623	0.99996	-0.67997	-1.6659	0.12109	0.76616	0.095742	0.46111	0.58245	1.4203	0.25627	0.87292	0.15551	0.54
Aldh1l2	4	-0.17406	-0.24239	0.03028	0.81566	1.8984	0.017742	0.49364	0.057648	0.88163	0.98972	1.1847	0.0099131	0.4071	0.23612	0.95279	0.17558	0.41137	0.37873	0.92001	0.6808	0.99998	0.41797	0.50711	0.24956	0.86777	0.61208	0.99996	-0.21595	-0.49234	0.49616	0.94886	0.62248	0.85583	-0.24623	-0.29072	0.46902	0.93875	0.77126	0.92268
Aldh2	4	-0.096913	-0.394184	0.351992	-0.068494	-0.24646	0.64704	0.95912	0.80533	0.97691	0.028419	0.086424	0.79025	0.9827	0.93113	0.99305	-0.32399	-1.1946	0.27553	0.88911	0.23223	0.99998	0.070194	0.21854	0.94662	0.99656	0.82701	0.99996	-0.043388	-0.15725	0.76046	0.98815	0.87505	0.95981	-0.39538	-1.2041	0.31981	0.89886	0.22854	0.61345
Aldh3a2	4	0.300218	0.03989	-0.69005	0.23619	0.87834	0.63418	0.95867	0.37976	0.91403	-0.064028	-0.20057	0.60129	0.96624	0.84103	0.98896	-0.49726	-1.8595	0.10335	0.79805	0.062949	0.99998	-0.53715	-1.7075	0.12694	0.78202	0.087732	0.99996	-0.31008	-1.1443	0.38066	0.90969	0.25251	0.6162	0.37997	1.2077	0.52966	0.94979	0.22718	0.61175
Aldh3b1	4	0.81922	0.02282	0.205654	0.25227	0.77252	0.60114	0.95372	0.43981	0.93084	-0.56695	-1.6575	0.070154	0.70433	0.097424	0.95279	0.19981	0.61592	0.32698	0.91001	0.53795	0.99998	0.17699	0.53179	0.69819	0.97395	0.59487	0.99996	0.19161	0.58667	0.80433	0.99003	0.55743	0.82195	-0.014044	-0.041731	0.79772	0.98207	0.96671	0.98784
Aldh4a1	4	0.56146	0.027365	0.50001	0.12139	0.36561	0.90331	0.99463	0.71465	0.96401	-0.44007	-1.3116	0.13034	0.802	0.18966	0.95279	0.090291	0.27347	0.60541	0.97097	0.78449	0.99998	0.062926	0.19007	0.96401	0.997	0.84926	0.99996	-0.77839	-2.3255	0.089421	0.71359	0.020043	0.30358	-1.2784	-3.812	0.024096	0.54545	0.00013784	0.016461
Aldh5a1	4	0.546174	0.26272	-0.27209	-0.0018763	-0.0056314	0.79594	0.97881	0.99551	0.99957	-0.54805	-1.4953	0.077729	0.72375	0.13484	0.95279	-0.32032	-0.97871	0.28062	0.89079	0.32772	0.99998	-0.58304	-1.6608	0.10355	0.75444	0.096758	0.99996	-0.81451	-2.3977	0.080779	0.70524	0.016498	0.28229	-0.54242	-1.5035	0.21468	0.85021	0.13272	0.51316
Aldh6a1	4	-0.53297	0.460246	-0.16808	0.16712	0.5398	0.79289	0.97817	0.58933	0.94564	0.70009	1.3987	0.088303	0.74231	0.16189	0.95279	0.009306	0.030276	0.85115	0.98722	0.97585	0.99998	-0.45094	-0.90436	0.18525	0.82884	0.36581	0.99996	0.61184	1.9876	0.17447	0.82584	0.046857	0.38464	0.77992	1.5702	0.096741	0.73354	0.11637	0.49078
Aldh7a1	4	0.63879	0.02196	0.5599	0.35884	1.0979	0.37924	0.90109	0.27226	0.89431	-0.27995	-0.85559	0.27162	0.89965	0.39222	0.95614	-0.37623	-1.1602	0.20746	0.85292	0.24599	0.99998	-0.39819	-1.2765	0.22861	0.85682	0.20178	0.99996	-0.27256	-0.82361	0.42367	0.92396	0.41016	0.73215	-0.83246	-2.5276	0.092014	0.72556	0.011483	0.2401
Aldh8a1	4	-0.31484	-0.7725	-0.555538	0.39855	0.76285	0.31671	0.88072	0.44555	0.93239	0.71339	1.552	0.080474	0.72761	0.12065	0.95279	-0.25605	-0.49066	0.39561	0.92428	0.62367	0.99998	0.51645	1.1393	0.14077	0.80006	0.25457	0.99996	0.057772	0.11026	0.93676	0.99778	0.9122	0.97268	0.61331	1.3424	0.22373	0.85462	0.17946	0.56622
Aldoa	4	0.09988	-0.745305	0.98857	0.24289	0.19899	0.62066	0.95622	0.84227	0.98118	0.14301	0.074421	0.95959	0.99525	0.94068	0.99358	0.025895	0.021295	0.79808	0.982	0.98301	0.99998	0.7712	0.43784	0.021199	0.51545	0.6615	0.99996	-0.79663	-0.64624	0.084642	0.70712	0.51812	0.79818	-1.7852	-0.9799	0.0055412	0.32733	0.32714	0.69347
Aldob	4	0.136238	-0.789127	-0.569456	-0.099962	-0.28729	0.58396	0.95178	0.77389	0.97371	-0.2362	-0.50563	0.32418	0.91893	0.61312	0.96286	-0.74836	-2.1815	0.024198	0.57888	0.029148	0.99998	0.040767	0.091523	0.98236	0.99778	0.92708	0.99996	0.018354	0.053302	0.8694	0.99517	0.95749	0.9872	0.58781	1.3103	0.2493	0.86689	0.19009	0.57646
Aldoc	4	0.274247	-0.692177	-0.26723	-0.015753	-0.066204	0.76356	0.97515	0.94722	0.99308	-0.29	-1.162	0.26125	0.89851	0.24522	0.95279	-0.60356	-2.5522	0.054954	0.69961	0.010704	0.99998	0.088617	0.36062	0.90336	0.99511	0.71838	0.99996	0.1918	0.81049	0.80398	0.99003	0.41766	0.73639	0.45903	1.8635	0.40806	0.92288	0.062392	0.41421
Alg1	4	-0.19484	0.246	0.56676	-0.53086	-0.87047	0.093132	0.72016	0.38404	0.91722	-0.33602	-0.58633	0.21377	0.87477	0.55766	0.95697	-0.67896	-1.1782	0.034569	0.63138	0.23871	0.99998	-0.92496	-1.7002	0.021402	0.51695	0.08909	0.99996	0.79539	1.426	0.060749	0.66889	0.15387	0.5277	0.22863	0.42624	0.78349	0.97918	0.66993	0.87912
Alg10b	4	-0.154245	-0.540265	0.60472	-0.042705	-0.092819	0.70149	0.96808	0.92605	0.99078	0.11154	0.28049	0.97001	0.99812	0.7791	0.98441	-0.56469	-1.2285	0.070154	0.7519	0.21926	0.99998	-0.024425	-0.061882	0.83005	0.98951	0.95066	0.99996	0.94366	2.0645	0.020741	0.49522	0.038967	0.36713	0.33894	0.85723	0.59733	0.96072	0.39132	0.73845
Alg11	4	0.19938	-0.728111	0.083479	0.34758	0.64015	0.39962	0.90625	0.52208	0.93709	0.1482	0.26932	0.94789	0.9935	0.78769	0.9861	0.044699	0.083109	0.74231	0.98074	0.93377	0.99998	0.77281	1.4765	0.020741	0.50995	0.13981	0.99996	-0.064601	-0.11837	0.72279	0.98157	0.90577	0.97005	-0.14808	-0.27055	0.59239	0.96072	0.78674	0.92895
Alg12	4	0.54558	-0.3359	0.2622	0.4201	0.63148	0.28163	0.86574	0.52773	0.93822	-0.12548	-0.22467	0.49143	0.95732	0.82224	0.98896	0.16058	0.24416	0.41274	0.92916	0.80711	0.99998	0.49648	0.91355	0.16013	0.8121	0.36095	0.99996	1.4732	2.2506	0.00015251	0.058824	0.024409	0.32365	1.211	2.2249	0.0036094	0.27953	0.026087	0.32566
Alg13	4	-1.18603	0.582763	0.38859	-0.56939	-1.1999	0.077119	0.70133	0.23018	0.89431	0.61664	1.0582	0.14768	0.81415	0.28996	0.95279	0.030633	0.067045	0.7839	0.982	0.94655	0.99998	-0.55213	-0.95125	0.11936	0.77607	0.34148	0.99996	0.82618	1.8066	0.048345	0.62484	0.070824	0.43039	0.43759	0.75495	0.43694	0.9312	0.45028	0.7702
Alg14	4	-0.16039	0.78673	-0.835215	0.20497	0.27392	0.70591	0.96877	0.78415	0.9748	0.36536	0.62144	0.48788	0.956	0.53431	0.95614	-0.22157	-0.30153	0.47013	0.95173	0.76301	0.99998	-1.0083	-1.7168	0.014437	0.4534	0.086015	0.99996	-0.74453	-0.97604	0.099283	0.72505	0.32905	0.67396	0.090685	0.15527	0.97524	0.99866	0.87661	0.95902
Alg2	4	-0.82885	0.5137	0.52663	-1.2372	-1.9284	0.0020335	0.18552	0.053801	0.88163	-0.40835	-0.43364	0.1522	0.81415	0.66455	0.96767	-1.0965	-1.694	0.003101	0.28241	0.090266	0.99998	-1.6102	-1.7181	0.00081338	0.11034	0.085782	0.99996	-0.27173	-0.42244	0.42494	0.92396	0.6727	0.87949	-0.79836	-0.85265	0.10162	0.74229	0.39385	0.73956
Alg3	4	-0.44583	0.144083	-0.22507	-0.14729	-0.60796	0.49347	0.92872	0.54322	0.94095	0.29854	0.74667	0.61746	0.96624	0.45526	0.95614	0.14274	0.59876	0.46144	0.94763	0.54933	0.99998	-0.0013432	-0.0034191	0.88404	0.99482	0.99727	0.99996	0.33399	1.3911	0.54527	0.95565	0.1642	0.53699	0.55906	1.4169	0.28123	0.88146	0.15651	0.54031
Alg5	4	-0.033534	0.07324	0.75082	0.025749	0.06246	0.86594	0.9905	0.9502	0.99308	0.059283	0.15474	0.85629	0.98887	0.87702	0.99049	-0.20144	-0.49462	0.51578	0.95794	0.62087	0.99998	-0.27468	-0.7211	0.36927	0.91105	0.47085	0.99996	0.83177	2.0484	0.046414	0.61924	0.04052	0.36884	0.08095	0.21227	0.95796	0.99642	0.83189	0.94541
Alg6	4	0.35794	-0.284002	0.24175	0.75244	1.3938	0.030807	0.56982	0.16337	0.88954	0.3945	0.56303	0.43811	0.94508	0.57341	0.95805	-0.0089816	-0.016851	0.91058	0.99294	0.98656	0.99998	0.27502	0.40961	0.48671	0.93879	0.68209	0.99996	0.89484	1.679	0.029282	0.53519	0.093145	0.45839	0.65309	0.95574	0.18565	0.83666	0.3392	0.70317
Alg8	4	-0.267943	0.533389	0.07793	-0.066103	-0.17662	0.65284	0.95912	0.85981	0.98175	0.20184	0.46237	0.824	0.98607	0.64381	0.96572	0.014359	0.03914	0.83473	0.98712	0.96878	0.99998	-0.51903	-1.2057	0.13878	0.79836	0.22792	0.99996	1.0365	2.8313	0.009303	0.37449	0.0046357	0.15148	0.95857	2.2473	0.030553	0.57925	0.024622	0.32171
Alg9	4	0.37105	-0.12363	0.28182	0.57665	1.4925	0.10981	0.74611	0.13556	0.88273	0.2056	0.59962	0.81516	0.98524	0.54876	0.95697	0.22512	0.5845	0.27548	0.88911	0.55888	0.99998	0.34875	1.0217	0.35484	0.90873	0.30692	0.99996	0.1446	0.37305	0.89548	0.99608	0.70911	0.89337	-0.13722	-0.40133	0.60795	0.96143	0.68817	0.88742
Alkbh1	4	-0.304316	-0.325733	-0.68041	-0.015946	-0.043982	0.76315	0.97512	0.96492	0.99513	0.28837	0.85118	0.63698	0.96624	0.39467	0.95614	-0.031603	-0.087692	0.98388	0.9998	0.93012	0.99998	0.29413	0.88074	0.45082	0.93406	0.37846	0.99996	-0.39596	-1.0887	0.29368	0.8854	0.2763	0.63383	0.28445	0.84486	0.68837	0.97055	0.39819	0.74146
Alkbh2	4	0.36028	-0.34594	0.277485	0.25077	0.78171	0.60399	0.95399	0.43438	0.92906	-0.10951	-0.30079	0.51899	0.96296	0.76357	0.98251	-0.15188	-0.47725	0.64608	0.97593	0.63318	0.99998	0.19406	0.5486	0.66062	0.9658	0.58328	0.99996	0.36935	1.1559	0.48899	0.94722	0.24773	0.61286	0.091865	0.25534	0.97758	0.99866	0.79846	0.93186
Alkbh3	4	-0.52572	0.49168	0.12456	-0.21906	-0.66969	0.37675	0.90028	0.50305	0.93634	0.30666	0.98482	0.60302	0.96624	0.32471	0.95279	-0.19791	-0.62145	0.52336	0.95946	0.5343	0.99998	-0.68959	-2.2237	0.063189	0.68199	0.026167	0.93478	0.28143	0.87679	0.63744	0.97149	0.3806	0.71255	0.15687	0.50577	0.90834	0.99234	0.61302	0.85134
Alkbh4	4	0.00239	0.197751	0.82934	-0.33075	-1.1091	0.23334	0.84155	0.2674	0.89431	-0.33314	-0.9595	0.21687	0.87658	0.33731	0.95279	0.24029	0.82371	0.24803	0.87455	0.41011	0.99998	0.042539	0.12883	0.98633	0.99815	0.89749	0.99996	0.65166	2.2235	0.13924	0.7894	0.026183	0.33121	-0.17768	-0.52243	0.55452	0.95417	0.60137	0.84754
Alkbh5	4	-0.509353	-0.639753	-0.649965	-0.4198	-1.9832	0.15459	0.78594	0.047342	0.88163	0.089553	0.35171	0.92202	0.99251	0.72505	0.98024	-0.61846	-2.9546	0.050175	0.68613	0.0031307	0.99998	0.021293	0.085277	0.93808	0.9952	0.93204	0.99996	-0.082265	-0.39158	0.6929	0.9768	0.69537	0.88857	0.5677	2.2655	0.27157	0.8772	0.023482	0.31813
Alkbh6	4	-0.05631	-0.374929	-0.838585	0.83528	2.5106	0.014539	0.45719	0.012054	0.71088	0.89159	2.0971	0.023385	0.55516	0.035987	0.95279	0.028141	0.084444	0.79091	0.982	0.9327	0.99998	0.40307	0.94999	0.27075	0.87776	0.34212	0.99996	-0.052455	-0.15717	0.74485	0.98663	0.87511	0.95981	0.78613	1.8523	0.09303	0.72763	0.063976	0.41768
Alkbh7	4	0.426444	0.169285	0.06533	0.48835	1.6352	0.19353	0.81922	0.10201	0.88163	0.061906	0.21619	0.86117	0.98887	0.82884	0.98896	0.14829	0.49985	0.44649	0.94567	0.61718	0.99998	-0.020995	-0.073875	0.83778	0.98956	0.94111	0.99996	0.34183	1.145	0.53205	0.95505	0.2522	0.61604	0.2765	0.97085	0.70174	0.97169	0.33162	0.69659
Alkbh8	4	-0.286317	-0.612001	-0.441878	-0.099367	-0.26681	0.58528	0.95197	0.78962	0.9748	0.18695	0.38532	0.85817	0.98887	0.7	0.97598	-0.011561	-0.031216	0.91836	0.99297	0.9751	0.99998	0.60044	1.2827	0.082304	0.72862	0.19959	0.99996	0.070662	0.18993	0.96131	0.99868	0.84936	0.95042	0.51254	1.0786	0.33918	0.90809	0.28075	0.66321
Alms1	4	-0.224636	-0.185185	0.05498	0.0039939	0.011818	0.81124	0.98131	0.99057	0.99919	0.22863	0.56436	0.76595	0.98142	0.57251	0.95805	0.065495	0.19414	0.68065	0.97931	0.84606	0.99998	0.25068	0.62425	0.53754	0.94934	0.53246	0.99996	0.27292	0.80791	0.65396	0.97332	0.41914	0.73751	0.21794	0.54052	0.80169	0.98207	0.58884	0.84263
Alox5ap	4	0.295329	0.261405	-0.513382	0.36117	0.97875	0.37563	0.89967	0.3277	0.91164	0.065841	0.17754	0.87006	0.98925	0.85908	0.98971	0.19584	0.53205	0.33501	0.91261	0.59469	0.99998	-0.065565	-0.17775	0.73804	0.97852	0.85892	0.99996	-0.45521	-1.2265	0.24412	0.86554	0.22001	0.58966	0.058172	0.15744	0.91759	0.99296	0.8749	0.95803
Aloxe3	4	0.22443	-0.25787	-0.03767	0.39162	1.273	0.32754	0.88661	0.20301	0.89431	0.16719	0.42299	0.90397	0.99169	0.6723	0.97005	0.13978	0.46233	0.46891	0.95116	0.64385	0.99998	0.39765	1.0344	0.27924	0.88057	0.30096	0.99996	0.35368	1.1536	0.51294	0.95126	0.24868	0.61286	0.39135	1.0029	0.51085	0.94671	0.31592	0.68607
Alpk1	4	0.438656	-0.1706	0.56593	0.034726	0.13341	0.88725	0.99204	0.89387	0.98523	-0.40393	-1.4755	0.15475	0.81454	0.14007	0.95279	-0.32225	-1.2398	0.27797	0.89072	0.21504	0.99998	-0.15165	-0.56476	0.56886	0.95257	0.57224	0.99996	0.22329	0.85858	0.74562	0.98663	0.39057	0.71994	-0.34264	-1.2629	0.36704	0.91111	0.20661	0.59288
Alpk2	4	-0.06527	-0.37416	0.566204	0.44288	1.2294	0.24844	0.84768	0.21893	0.89431	0.50815	1.1407	0.26491	0.89851	0.254	0.95279	-0.31476	-0.87252	0.28839	0.89325	0.38293	0.99998	0.0594	0.13395	0.97296	0.99729	0.89344	0.99996	0.4889	1.3569	0.30827	0.89053	0.17482	0.54937	-0.077304	-0.17376	0.69819	0.97169	0.86205	0.9541
Alpl	4	0.324452	0.19647	-0.37388	0.027612	0.085599	0.87144	0.9905	0.93178	0.99143	-0.29684	-0.8427	0.25403	0.89851	0.39939	0.95614	-0.11855	-0.37241	0.74302	0.98074	0.70959	0.99998	-0.31502	-0.92456	0.31635	0.90184	0.35519	0.99996	0.4847	1.518	0.31346	0.89053	0.12901	0.50111	0.85858	2.53	0.060393	0.66556	0.011405	0.2392
Als2	4	0.126778	-0.03444	-0.29414	0.0097376	0.024981	0.82451	0.98343	0.98007	0.99726	-0.11704	-0.27008	0.50607	0.96089	0.7871	0.98586	-0.61573	-1.6175	0.050531	0.68613	0.10578	0.99998	-0.58129	-1.385	0.10432	0.75524	0.16606	0.99996	-0.55123	-1.3849	0.18164	0.82912	0.16608	0.53976	-0.25709	-0.60056	0.45737	0.93482	0.54814	0.82409
Als2cl	4	0.007371	0.496879	0.18928	0.095679	0.26961	0.96813	0.99703	0.78746	0.9748	0.088308	0.24462	0.91948	0.99251	0.80675	0.98732	0.057249	0.1625	0.7054	0.97931	0.87091	0.99998	-0.43963	-1.2303	0.19313	0.83116	0.21859	0.99996	0.47906	1.3562	0.32108	0.89053	0.17505	0.54953	0.28978	0.80953	0.67887	0.96975	0.41821	0.75448
Alyref	4	-1.61221	0.0434	0.159311	-1.2624	-2.4253	0.0017793	0.17588	0.015295	0.74733	0.34981	0.36358	0.51716	0.96296	0.71617	0.97813	-0.25542	-0.49047	0.39652	0.92428	0.6238	0.99998	-0.29882	-0.31512	0.33755	0.90848	0.75267	0.99996	0.045891	0.088198	0.91724	0.99678	0.92972	0.97864	-0.11342	-0.11824	0.64369	0.96839	0.90588	0.96822
Alyref2	4	0.2288	0.44519	0.34901	0.29888	0.92302	0.4983	0.92942	0.356	0.91246	0.07008	0.21644	0.87896	0.98925	0.82865	0.98896	-0.20103	-0.62104	0.5165	0.95794	0.53457	0.99998	-0.64622	-2.0057	0.077983	0.71985	0.044884	0.98076	-0.97749	-2.9958	0.046261	0.61889	0.002737	0.10943	-1.3265	-4.079	0.021199	0.53599	4.5229e-05	0.0074142
Amacr	4	-0.62957	0.68211	0.31111	-0.56624	-1.5889	0.078339	0.70365	0.11209	0.88163	0.06333	0.16815	0.86467	0.98887	0.86647	0.99008	0.09911	0.28513	0.58096	0.96717	0.77555	0.99998	-0.583	-1.5631	0.1036	0.75444	0.11802	0.99996	-0.25149	-0.71253	0.44939	0.93654	0.47614	0.77571	-0.5626	-1.4913	0.20411	0.84426	0.13588	0.51674
Ambp	4	0.0360418	-0.16698	0.10866	0.027692	0.08388	0.87159	0.9905	0.93315	0.99143	-0.0083498	-0.02219	0.71176	0.97651	0.9823	0.99745	-0.45738	-1.4132	0.13009	0.81434	0.1576	0.99998	-0.2904	-0.78799	0.34848	0.90873	0.43071	0.99996	-0.1131	-0.34369	0.64567	0.97256	0.73108	0.90108	-0.22176	-0.59282	0.50053	0.94614	0.5533	0.82699
Ambra1	4	-0.42152	-0.659462	-1.03297	-0.24111	-0.75767	0.34406	0.89182	0.44865	0.93404	0.18041	0.5456	0.87474	0.98925	0.58534	0.9581	-0.71536	-2.3101	0.028214	0.59338	0.020881	0.99998	-0.055898	-0.17476	0.75888	0.9803	0.86127	0.99996	-1.2213	-3.7028	0.021046	0.49522	0.00021326	0.020665	-0.18833	-0.5707	0.54176	0.95237	0.5682	0.83318
Amd1	4	-0.88074	-1.22322	-1.02233	-0.32167	-0.58134	0.24254	0.84413	0.56101	0.94401	0.55907	1.3186	0.20355	0.86874	0.18731	0.95279	-1.1604	-2.099	0.002186	0.22995	0.035818	0.99998	0.062824	0.15135	0.96426	0.997	0.8797	0.99996	-0.40757	-0.73692	0.28331	0.8793	0.46117	0.76611	0.61476	1.4693	0.22266	0.85395	0.14176	0.52434
Amd2	4	0.377266	-0.75343	-0.0676	0.37165	0.97594	0.35804	0.89473	0.32909	0.91164	-0.0056161	-0.014306	0.71791	0.9782	0.98859	0.99802	-0.28574	-0.75191	0.33837	0.91261	0.4521	0.99998	0.46769	1.2151	0.19053	0.83116	0.22432	0.99996	-0.44072	-1.1479	0.25535	0.87176	0.251	0.6151	-0.37312	-0.95331	0.33877	0.90769	0.34043	0.70432
Amdhd1	4	-1.02405	0.0253651	-0.33679	-0.9234	-3.7576	0.011133	0.41954	0.00017155	0.076693	0.10065	0.37009	0.94525	0.99348	0.71132	0.97813	0.026075	0.10798	0.79752	0.982	0.91401	0.99998	0.00070985	0.0026364	0.88882	0.99482	0.9979	0.99996	-0.21031	-0.86297	0.5047	0.95035	0.38816	0.71844	0.12648	0.46771	0.96025	0.99642	0.63999	0.8656
Amdhd2	4	0.33598	0.10295	0.54159	0.50954	1.338	0.17	0.79952	0.18091	0.89313	0.17356	0.67049	0.88938	0.99026	0.50255	0.95614	0.3322	0.87616	0.1247	0.80952	0.38095	0.99998	0.22925	0.89162	0.58167	0.95353	0.3726	0.99996	-0.19564	-0.51059	0.52427	0.95358	0.60964	0.84903	-0.73723	-2.8459	0.12318	0.77717	0.0044288	0.1434
Amer1	4	-0.6116	0.422083	0.05935	-0.34712	-1.128	0.21626	0.82972	0.25933	0.89431	0.26448	0.82922	0.68848	0.9735	0.40698	0.95614	0.041813	0.13703	0.75075	0.98159	0.89101	0.99998	-0.38027	-1.2034	0.2464	0.8668	0.22883	0.99996	-0.48086	-1.5608	0.2248	0.85803	0.11856	0.48933	-0.54021	-1.6854	0.21626	0.85233	0.091906	0.45642
Amfr	4	-1.06023	-0.132776	-0.567672	-0.9042	-2.9938	0.012557	0.43257	0.0027551	0.35961	0.15603	0.40439	0.93	0.99251	0.68593	0.97339	-0.10135	-0.3363	0.79554	0.982	0.73665	0.99998	0.031426	0.082811	0.9605	0.99668	0.934	0.99996	0.086408	0.28646	0.99019	0.99923	0.77453	0.92075	0.65408	1.7189	0.18509	0.83658	0.085628	0.44736
Amhr2	4	-0.411421	-0.02855	0.318766	0.060579	0.2312	0.9485	0.99703	0.81716	0.9781	0.472	1.4549	0.31234	0.9155	0.14569	0.95279	-0.21265	-0.82132	0.48889	0.95378	0.41146	0.99998	-0.1841	-0.57186	0.51035	0.94289	0.56741	0.99996	0.026796	0.10254	0.8844	0.99544	0.91833	0.97466	-0.29197	-0.89668	0.41904	0.92459	0.36989	0.72402
Amigo1	4	-0.37797	-0.22972	-0.32491	0.12851	0.22895	0.88577	0.9918	0.81891	0.97854	0.50648	0.85218	0.26638	0.89851	0.39411	0.95614	-0.37993	-0.6824	0.2036	0.85011	0.49498	0.99998	-0.15021	-0.25653	0.5713	0.95257	0.79755	0.99996	-0.49323	-0.87007	0.21717	0.85658	0.38426	0.71532	-0.16832	-0.28235	0.56591	0.95604	0.77767	0.92533
Amigo3	4	0.49553	-0.49096	-0.675638	0.66288	2.2354	0.059834	0.65498	0.025392	0.86537	0.16735	0.39649	0.90351	0.99169	0.69174	0.97444	-0.36076	-1.2169	0.22642	0.86654	0.22362	0.99998	0.1302	0.31266	0.80692	0.98669	0.75454	0.99996	0.036672	0.12297	0.90107	0.99608	0.90213	0.96866	0.71231	1.7064	0.13934	0.79796	0.087926	0.44917
Ammecr1	4	-0.224263	-0.29868	-0.433089	-0.086553	-0.41936	0.61176	0.95433	0.67495	0.9576	0.13771	0.51711	0.97265	0.99833	0.60508	0.96214	-0.16819	-0.8168	0.60027	0.96994	0.41404	0.99998	0.13049	0.49341	0.80636	0.98669	0.62173	0.99996	0.078641	0.38121	0.97707	0.99923	0.70305	0.89104	0.51173	1.9323	0.3404	0.90809	0.053318	0.39809
Ammecr1l	4	0.1615	-0.239726	0.30203	0.29251	0.81918	0.51243	0.93429	0.41268	0.92545	0.13101	0.3485	0.98694	0.99923	0.72746	0.98024	-0.3072	-0.8643	0.3012	0.90079	0.38742	0.99998	-0.067474	-0.18274	0.73402	0.97805	0.855	0.99996	0.43753	1.23	0.37919	0.90969	0.21871	0.58859	0.1355	0.3635	0.94586	0.9964	0.71623	0.89963
Amn1	4	0.1284	0.33854	0.350259	0.53661	1.6096	0.14346	0.7757	0.10748	0.88163	0.40821	1.2365	0.41254	0.93813	0.21627	0.95279	0.51902	1.5606	0.019623	0.54354	0.11862	0.99998	0.18048	0.55054	0.69036	0.97288	0.58195	0.99996	0.34156	1.0237	0.53236	0.95505	0.30599	0.65609	-0.0086989	-0.026386	0.8057	0.98247	0.97895	0.99288
Amotl1	4	0.115435	-0.36892	0.39951	0.061273	0.13904	0.94998	0.99703	0.88942	0.9845	-0.054162	-0.10146	0.62066	0.96624	0.91919	0.99236	0.15958	0.36544	0.41508	0.93039	0.71478	0.99998	0.5285	1.0099	0.13131	0.78787	0.31256	0.99996	0.56089	1.2806	0.22602	0.8593	0.20034	0.57428	0.16138	0.30541	0.90077	0.99205	0.76006	0.91724
Amotl2	4	-0.091385	-0.06332	-0.26385	-0.11487	-0.43177	0.55498	0.94558	0.66591	0.95592	-0.023485	-0.081409	0.68136	0.97208	0.93512	0.99328	-0.47754	-1.8033	0.1158	0.80068	0.071344	0.99998	-0.41422	-1.4467	0.21412	0.84874	0.14797	0.99996	0.35618	1.3455	0.50979	0.95035	0.17845	0.55255	0.62003	2.1668	0.21697	0.8537	0.030254	0.33997
Ampd2	4	-0.12473	-0.448794	0.157721	0.23737	0.59217	0.63189	0.95823	0.55374	0.94297	0.3621	0.81945	0.49357	0.95857	0.41253	0.95614	-0.45087	-1.1295	0.13487	0.81727	0.2587	0.99998	-0.0020756	-0.0047717	0.88226	0.99482	0.99619	0.99996	-0.0069091	-0.017214	0.82472	0.99003	0.98627	0.99519	-0.16463	-0.37221	0.57018	0.95708	0.70974	0.89748
Ampd3	4	0.066659	-0.33918	0.16463	0.16293	0.51099	0.80331	0.97991	0.60936	0.94837	0.096271	0.32666	0.93518	0.99251	0.74392	0.98236	-0.15885	-0.49935	0.62717	0.97283	0.61754	0.99998	0.18033	0.61641	0.69046	0.97288	0.53762	0.99996	0.38264	1.2018	0.46642	0.94209	0.22945	0.59727	0.21801	0.74332	0.80164	0.98207	0.45729	0.7751
Amt	4	-0.482851	-0.6683	-0.17449	0.017239	0.045014	0.84388	0.987	0.9641	0.99513	0.50009	1.0533	0.27314	0.90003	0.29221	0.95279	-0.25707	-0.67149	0.39337	0.92428	0.50191	0.99998	0.41123	0.8706	0.25911	0.87489	0.38397	0.99996	0.51163	1.3374	0.2796	0.87854	0.18108	0.5556	0.68612	1.4505	0.15932	0.81678	0.14691	0.53062
Amy1	4	-0.23774	-0.107933	-0.780666	-0.10063	-0.28705	0.58258	0.95114	0.77407	0.97371	0.13711	0.3284	0.97443	0.99849	0.74261	0.98236	-0.020181	-0.058662	0.94723	0.99743	0.95322	0.99998	0.087752	0.21511	0.90585	0.99511	0.82968	0.99996	0.063054	0.18092	0.94713	0.99807	0.85643	0.9531	0.84372	2.0627	0.066189	0.67835	0.039145	0.37147
Amz1	4	-0.49472	-1.19494	-0.401638	-0.26216	-0.84963	0.31452	0.87892	0.39553	0.92007	0.23256	0.60063	0.75766	0.98142	0.54809	0.95697	-0.88633	-2.871	0.011031	0.47277	0.0040922	0.99998	0.30861	0.80177	0.42357	0.92836	0.42269	0.99996	0.024942	0.080966	0.88109	0.99535	0.93547	0.98049	0.42658	1.1065	0.45382	0.93413	0.26853	0.6526
Amz2	4	-0.44093	-0.157451	-0.02029	-0.303	-1.1827	0.26277	0.85684	0.23694	0.89431	0.13793	0.2972	0.97235	0.99823	0.76632	0.98251	-0.063662	-0.25941	0.91383	0.99294	0.79532	0.99998	0.093789	0.2094	0.89213	0.99511	0.83413	0.99996	-0.2796	-1.1021	0.41569	0.92393	0.27043	0.62997	-0.25931	-0.55926	0.45524	0.93413	0.57598	0.83579
Anapc1	4	0.501923	0.209716	0.11131	0.45775	0.72972	0.22958	0.84045	0.46556	0.93596	-0.044173	-0.028651	0.63967	0.96674	0.97714	0.99603	0.23114	0.37484	0.26486	0.88048	0.70778	0.99998	0.021424	0.014221	0.93828	0.9952	0.98865	0.99996	0.81879	1.3208	0.051395	0.63425	0.18655	0.56137	0.70748	0.46794	0.1427	0.79847	0.63983	0.86554
Anapc10	4	1.36193	1.27468	0.48524	0.78837	1.0002	0.023181	0.5213	0.3172	0.90869	-0.57356	-0.94493	0.067511	0.69832	0.34469	0.9542	0.59712	0.76945	0.0082355	0.41371	0.44162	0.99998	-0.67756	-1.1567	0.067256	0.69102	0.2474	0.99996	1.0221	1.3075	0.010523	0.38837	0.19104	0.56724	0.53686	0.9235	0.30975	0.89492	0.35575	0.71289
Anapc11	4	0.133542	0.01457	-0.321072	-0.017518	-0.0078044	0.75944	0.97512	0.99377	0.99955	-0.15106	-0.2427	0.44924	0.94533	0.80824	0.98752	0.61937	0.3055	0.006202	0.3631	0.75998	0.99998	0.6048	1.0018	0.080169	0.72449	0.31644	0.99996	-0.065412	-0.029322	0.72137	0.98146	0.97661	0.99199	0.25566	0.41681	0.73682	0.97483	0.67681	0.88334
Anapc13	4	-0.0605	0.02796	-0.33718	0.18085	0.3178	0.76198	0.97512	0.75064	0.97028	0.24135	0.31265	0.73916	0.98142	0.75455	0.98236	-0.14827	-0.26538	0.65701	0.97701	0.79072	0.99998	-0.17623	-0.23339	0.52397	0.94613	0.81546	0.99996	-0.72016	-1.242	0.10706	0.74151	0.21423	0.58512	-0.38298	-0.49498	0.33059	0.90324	0.62062	0.85492
Anapc16	4	0.6456	-0.45809	-0.25734	0.35297	0.9068	0.39027	0.90475	0.36451	0.91246	-0.29263	-0.68328	0.2583	0.89851	0.49443	0.95614	-0.15956	-0.40981	0.62513	0.97283	0.68194	0.99998	0.29853	0.70257	0.44207	0.93406	0.48232	0.99996	0.32608	0.83698	0.55915	0.95938	0.4026	0.72836	0.58342	1.372	0.25535	0.87201	0.17007	0.55556
Anapc2	4	-0.97447	-0.62641	0.200253	-1.147	-2.3721	0.003101	0.23462	0.017687	0.79064	-0.17253	-0.33528	0.41498	0.93813	0.73742	0.98236	-0.30367	-0.66207	0.30629	0.90129	0.50793	0.99998	0.32274	0.65581	0.39891	0.92319	0.51195	0.99996	0.26743	0.57708	0.66357	0.97332	0.56388	0.82403	0.067177	0.1329	0.93376	0.99534	0.89428	0.96417
Anapc4	4	-0.83652	0.140421	0.30311	-0.40378	-1.1119	0.16578	0.79368	0.26619	0.89431	0.43274	0.67544	0.37324	0.92863	0.4994	0.95614	0.16299	0.45641	0.40679	0.92674	0.6481	0.99998	0.022569	0.036027	0.94113	0.99548	0.97126	0.99996	-0.83529	-2.2885	0.075339	0.7	0.022111	0.31201	-1.1384	-1.7387	0.036704	0.60049	0.082085	0.44226
Anapc5	4	0.084747	0.39851	1.26452	0.028517	0.02729	0.87377	0.9905	0.97823	0.99688	-0.05623	-0.09788	0.61603	0.96624	0.92203	0.99236	0.50432	0.52067	0.022927	0.56855	0.60259	0.99998	0.10581	0.19583	0.86447	0.99357	0.84474	0.99996	1.1114	1.1322	0.0051345	0.30606	0.25754	0.61971	-0.15312	-0.27033	0.58507	0.96044	0.78691	0.92895
Anapc7	4	-0.075684	0.38765	0.11729	-0.13281	-0.42508	0.52133	0.9369	0.67078	0.95661	-0.057126	-0.17544	0.61461	0.96624	0.86074	0.98971	0.28114	0.91287	0.18204	0.83746	0.36131	0.99998	-0.10651	-0.33166	0.65177	0.96349	0.74015	0.99996	-0.98761	-3.1127	0.044634	0.60942	0.0018539	0.084027	-1.1049	-3.3595	0.040211	0.61555	0.0007809	0.051721
Ang	4	0.414186	0.55599	-0.213074	0.010676	0.041357	0.82736	0.98356	0.96701	0.99542	-0.40351	-1.2371	0.15495	0.81454	0.21606	0.95279	-0.19025	-0.74707	0.54354	0.96455	0.45502	0.99998	-0.74624	-2.3602	0.048498	0.64541	0.018263	0.82463	-0.16836	-0.65216	0.56327	0.9605	0.5143	0.79609	0.044714	0.14089	0.89548	0.99193	0.88796	0.96225
Angel1	4	0.03311	-0.11391	-0.390521	0.27845	0.95272	0.5439	0.94265	0.34073	0.91192	0.24534	0.78616	0.73052	0.98049	0.43178	0.95614	0.37417	1.2959	0.086066	0.77306	0.19502	0.99998	0.48808	1.585	0.16837	0.81794	0.11297	0.99996	-0.091471	-0.31194	0.67938	0.97519	0.75509	0.91194	0.29905	0.96427	0.66285	0.96846	0.33491	0.69943
Angel2	4	-0.047572	0.049308	-0.36628	0.020811	0.06058	0.85278	0.98776	0.95169	0.99367	0.068383	0.20107	0.87494	0.98925	0.84064	0.98896	0.069218	0.20437	0.66962	0.97931	0.83807	0.99998	0.01991	0.059505	0.93503	0.9952	0.95255	0.99996	0.19768	0.57849	0.79223	0.98927	0.56293	0.82392	0.56396	1.681	0.27584	0.88042	0.092767	0.45735
Angpt2	4	-0.72276	0.096485	-0.30115	-0.31908	-0.94603	0.24539	0.84657	0.34413	0.91192	0.40368	1.3344	0.42037	0.93899	0.18207	0.95279	0.037084	0.11058	0.76402	0.98197	0.91195	0.99998	-0.059401	-0.19854	0.75161	0.98009	0.84262	0.99996	0.4711	1.4031	0.33089	0.89152	0.1606	0.53282	0.77225	2.5788	0.10142	0.74229	0.0099153	0.22215
Angptl2	4	0.58018	-0.67245	0.259625	0.45081	1.5408	0.23781	0.84215	0.12338	0.88163	-0.12937	-0.29492	0.48523	0.95584	0.76805	0.98251	-0.23378	-0.80531	0.44177	0.94241	0.42064	0.99998	0.43867	1.0468	0.22271	0.85623	0.2952	0.99996	0.059535	0.20252	0.94027	0.99807	0.83951	0.9474	-0.20009	-0.46126	0.5261	0.94979	0.64461	0.86838
Angptl3	4	0.28826	-0.64419	0.23276	-0.17327	-0.50542	0.4497	0.91967	0.61327	0.94914	-0.46153	-1.3841	0.11621	0.77804	0.16634	0.95279	-0.13283	-0.39328	0.70205	0.97931	0.69411	0.99998	0.51136	1.5963	0.14534	0.80087	0.11041	0.99996	-0.54807	-1.5916	0.18332	0.82912	0.11148	0.48	-0.78083	-2.3523	0.10721	0.75339	0.018657	0.2927
Angptl4	4	0.448748	0.085756	-0.86399	-0.005052	-0.016094	0.78939	0.97808	0.98716	0.99876	-0.4538	-1.4818	0.12094	0.78489	0.13839	0.95279	-0.023354	-0.075282	0.95669	0.99746	0.93999	0.99998	-0.10911	-0.36714	0.64648	0.96278	0.71351	0.99996	-0.3129	-0.9938	0.37685	0.90969	0.32032	0.66754	0.55109	1.8483	0.29053	0.88554	0.064552	0.41811
Angptl6	4	-0.10742	0.43649	0.318	-0.32343	-0.60501	0.24061	0.8428	0.54517	0.94136	-0.21601	-0.26201	0.34869	0.92115	0.79331	0.98631	0.31835	0.62816	0.13736	0.81732	0.5299	0.99998	-0.11814	-0.15587	0.62976	0.96132	0.87613	0.99996	-0.48628	-0.90942	0.22134	0.85709	0.36313	0.69971	-0.80428	-0.9676	0.099639	0.74141	0.33324	0.69811
Ank	4	-0.37729	-0.241372	-0.91671	0.14367	0.35476	0.84917	0.98747	0.72277	0.96512	0.52096	0.95617	0.24839	0.89618	0.33899	0.95279	-0.079832	-0.19946	0.86173	0.98838	0.8419	0.99998	0.16154	0.29902	0.73291	0.97782	0.76492	0.99996	-0.25384	-0.62388	0.44588	0.93448	0.53271	0.80729	0.66287	1.224	0.17701	0.82375	0.22093	0.60623
Ank2	4	-0.26877	-0.52269	-0.24319	0.38392	0.97803	0.33842	0.89021	0.32806	0.91164	0.65269	1.0754	0.11941	0.78125	0.28221	0.95279	0.4394	1.1406	0.046363	0.67908	0.25403	0.99998	0.96209	1.6314	0.0036602	0.27481	0.1028	0.99996	0.6557	1.6855	0.13573	0.78668	0.091901	0.45665	0.89889	1.5035	0.045753	0.62413	0.13271	0.51316
Ankfy1	4	-0.072374	0.388521	-0.00166	-0.11025	-0.28501	0.56388	0.94854	0.77564	0.97371	-0.037876	-0.097733	0.65243	0.96846	0.92214	0.99236	0.016411	0.042976	0.82828	0.98712	0.96572	0.99998	-0.37211	-0.9744	0.25428	0.87223	0.32986	0.99996	0.52159	1.3621	0.2674	0.87407	0.17317	0.54721	0.52325	1.3697	0.3255	0.90136	0.17077	0.55638
Ankhd1	4	0.231695	-0.13387	-1.26003	-0.021175	-0.079255	0.75172	0.97495	0.93683	0.99179	-0.25287	-0.79612	0.30385	0.91431	0.42596	0.95614	-0.21115	-0.80044	0.49245	0.95428	0.42346	0.99998	-0.07728	-0.24468	0.71374	0.97541	0.8067	0.99996	-0.51679	-1.9239	0.20263	0.84413	0.054373	0.40057	0.74324	2.3531	0.11794	0.76664	0.018617	0.2927
Ankib1	4	-0.359209	0.13427	0.235221	0.091531	0.24566	0.97829	0.99767	0.80594	0.97691	0.45074	0.90519	0.34538	0.92106	0.36537	0.9542	0.24462	0.68639	0.24056	0.87223	0.49247	0.99998	0.11035	0.23116	0.85293	0.99214	0.81719	0.99996	-0.032459	-0.08745	0.78039	0.98842	0.93031	0.97864	-0.26768	-0.52908	0.44553	0.93192	0.59675	0.84531
Ankle1	4	-0.20169	0.11346	-0.4552	0.29684	1.1374	0.50272	0.93102	0.25539	0.89431	0.49853	1.553	0.27569	0.90154	0.12042	0.95279	-0.00811	-0.031284	0.90733	0.99294	0.97504	0.99998	-0.12157	-0.38127	0.62346	0.96132	0.70301	0.99996	0.19608	0.75174	0.79584	0.98952	0.45221	0.76089	0.65128	2.0409	0.18743	0.83751	0.041258	0.37713
Ankle2	4	-0.75386	-0.24651	0.045148	-0.52903	-2.2282	0.093539	0.72016	0.025867	0.86918	0.22483	0.89027	0.77302	0.98142	0.37332	0.9542	-0.14827	-0.62523	0.65701	0.97701	0.53182	0.99998	0.09824	0.39026	0.88165	0.99482	0.69635	0.99996	-0.096932	-0.40806	0.66987	0.97332	0.68323	0.88431	-0.14208	-0.5643	0.60063	0.96072	0.57255	0.83544
Ankmy2	4	0.25165	-0.32195	0.06802	0.47492	1.4599	0.20828	0.82322	0.14431	0.88381	0.22327	0.595	0.77657	0.98142	0.55184	0.95697	-0.4834	-1.4846	0.11204	0.80068	0.13765	0.99998	-0.16145	-0.43627	0.55076	0.95013	0.66264	0.99996	0.32581	1.0011	0.55955	0.95938	0.31675	0.66484	0.25779	0.69253	0.73321	0.97483	0.48861	0.79139
Ankra2	4	-0.11797	0.312521	0.60305	0.45531	1.3123	0.23273	0.84155	0.1894	0.89431	0.57328	1.7705	0.18799	0.85055	0.076641	0.95279	0.033691	0.097348	0.77434	0.982	0.92245	0.99998	-0.27883	-0.86486	0.36394	0.90873	0.38712	0.99996	0.35244	1.0156	0.51538	0.95136	0.3098	0.65889	-0.25061	-0.77233	0.46378	0.93724	0.43992	0.76511
Ankrd10	4	-0.96848	-0.59729	0.65353	-0.46514	-0.90314	0.12526	0.76456	0.36645	0.91246	0.50334	1.4142	0.26948	0.89851	0.15731	0.95279	-0.40376	-0.79831	0.17854	0.8373	0.42469	0.99998	0.19353	0.54614	0.66153	0.9658	0.58497	0.99996	1.045	2.0759	0.0086422	0.36481	0.037905	0.36559	0.39147	1.1025	0.5106	0.94671	0.27024	0.655
Ankrd11	4	0.429449	-0.437771	-0.35677	0.46691	1.1454	0.2187	0.83214	0.25206	0.89431	0.037461	0.088076	0.81114	0.98524	0.92982	0.99291	0.028089	0.069688	0.79106	0.982	0.94444	0.99998	0.46586	1.107	0.19216	0.83116	0.26829	0.99996	-0.52892	-1.2757	0.19404	0.83523	0.20206	0.5745	-0.17215	-0.40659	0.56118	0.95534	0.68431	0.88624
Ankrd12	4	0.504747	-0.205385	0.12376	0.037507	0.12593	0.89396	0.99279	0.89979	0.98628	-0.46724	-1.7355	0.11352	0.77186	0.082646	0.95279	-0.076255	-0.26547	0.87276	0.98896	0.79065	0.99998	0.12913	0.52619	0.80947	0.98669	0.59876	0.99996	-0.18769	-0.63013	0.53495	0.95506	0.52861	0.80457	-0.31145	-1.2038	0.39912	0.92267	0.22865	0.61345
Ankrd13a	4	0.17806	-0.531	-0.113796	0.35312	1.2958	0.39002	0.90475	0.19503	0.89431	0.17506	0.51285	0.88623	0.99026	0.60806	0.96214	-0.18191	-0.67178	0.56377	0.96565	0.50172	0.99998	0.34909	1.0501	0.35413	0.90873	0.29367	0.99996	0.068374	0.25035	0.9572	0.99841	0.80231	0.93315	0.18217	0.53989	0.86539	0.99092	0.58927	0.84266
Ankrd13b	4	-0.35012	-0.01837	0.85838	-0.6387	-1.6693	0.053175	0.64054	0.095062	0.88163	-0.28858	-0.63603	0.26272	0.89851	0.52476	0.95614	0.39241	1.0569	0.07295	0.75621	0.29055	0.99998	0.41078	0.93596	0.25987	0.87489	0.34929	0.99996	-0.67262	-1.7586	0.12394	0.76996	0.078651	0.44147	-1.531	-3.3469	0.012252	0.482	0.00081721	0.052879
Ankrd13c	4	-0.22675	0.074207	1.01824	0.47406	1.7185	0.20965	0.82546	0.085697	0.88163	0.70081	1.723	0.088099	0.74198	0.08488	0.95279	-0.017895	-0.065208	0.9393	0.9959	0.94801	0.99998	-0.092102	-0.22775	0.6811	0.9727	0.81984	0.99996	0.07973	0.28817	0.97931	0.99923	0.77322	0.91995	-0.93851	-2.2702	0.066494	0.67835	0.023195	0.31729
Ankrd13d	4	0.275624	-0.136593	-0.60808	0.2905	0.7187	0.51665	0.93534	0.47233	0.93596	0.014876	0.030682	0.76041	0.98142	0.97552	0.99585	-0.00086292	-0.0021707	0.88277	0.98999	0.99827	0.99998	0.13573	0.28311	0.79305	0.98653	0.77709	0.99996	0.2763	0.68653	0.64694	0.97272	0.49238	0.78362	0.88438	1.8438	0.04982	0.63037	0.065208	0.41974
Ankrd16	4	0.163372	-0.32483	-0.1777	0.072171	0.2839	0.97575	0.99735	0.77649	0.97371	-0.091201	-0.31098	0.55122	0.96468	0.75582	0.98236	-0.48214	-1.91	0.11296	0.80068	0.05613	0.99998	-0.15731	-0.54647	0.55849	0.95128	0.58474	0.99996	0.12041	0.47531	0.94433	0.99807	0.63457	0.86367	0.29811	1.0303	0.66463	0.96895	0.30288	0.67793
Ankrd17	4	0.103999	-0.32067	0.26519	0.055767	0.21932	0.93732	0.99703	0.8264	0.97908	-0.048232	-0.11237	0.63195	0.96624	0.91053	0.9921	-0.16505	-0.65127	0.61024	0.97167	0.51487	0.99998	0.15562	0.36714	0.74567	0.98002	0.71352	0.99996	-0.24526	-0.96141	0.45702	0.93822	0.33634	0.67893	-0.51045	-1.193	0.23532	0.85934	0.23288	0.61672
Ankrd23	4	-0.34346	-0.197972	-0.4346	-0.54851	-1.6566	0.086015	0.7156	0.097604	0.88163	-0.20505	-0.65048	0.36556	0.92762	0.51538	0.95614	-0.27576	-0.85113	0.35662	0.91448	0.3947	0.99998	-0.077788	-0.24923	0.71247	0.97517	0.80318	0.99996	0.3615	1.1126	0.50119	0.95035	0.26587	0.6257	0.7961	2.5505	0.087693	0.71755	0.010757	0.23304
Ankrd24	4	0.216207	-0.046409	-0.39333	0.054787	0.20439	0.93513	0.99703	0.83805	0.98118	-0.16142	-0.51425	0.43297	0.94345	0.60707	0.96214	-0.07019	-0.2619	0.89233	0.99159	0.7934	0.99998	-0.023781	-0.076515	0.83163	0.98951	0.93901	0.99996	-0.70092	-2.6055	0.11311	0.75193	0.0091732	0.22021	-0.30759	-0.984	0.40389	0.92283	0.32512	0.69271
Ankrd26	4	-0.45058	-0.67778	0.0772	-0.15487	-0.30175	0.47974	0.92538	0.76284	0.9737	0.29571	0.51295	0.62315	0.96624	0.60799	0.96214	-0.35476	-0.69836	0.23344	0.86881	0.48495	0.99998	0.32302	0.57334	0.3984	0.92319	0.56642	0.99996	0.47933	0.94299	0.32078	0.89053	0.34569	0.68706	0.40213	0.70387	0.49245	0.94513	0.48152	0.7888
Ankrd27	4	-0.5849	-0.005712	-0.281389	0.30612	0.76981	0.4831	0.92721	0.44141	0.93127	0.89102	1.7929	0.023436	0.55516	0.072984	0.95279	0.06856	0.17461	0.672	0.97931	0.86139	0.99998	0.074272	0.15037	0.93747	0.9952	0.88047	0.99996	-0.0022688	-0.0056914	0.83239	0.99063	0.99546	0.99842	0.27912	0.56057	0.69798	0.97169	0.57509	0.83579
Ankrd28	4	0.42534	-0.070231	0.190693	0.23821	0.64521	0.63006	0.95823	0.51879	0.93708	-0.18713	-0.58227	0.39154	0.93233	0.56039	0.95737	-0.033531	-0.093131	0.99019	0.9998	0.9258	0.99998	0.0367	0.12118	0.9728	0.99729	0.90355	0.99996	0.21502	0.58669	0.76046	0.98815	0.55741	0.82195	0.024327	0.078117	0.86264	0.99092	0.93773	0.97843
Ankrd33b	4	0.01395	-0.194956	0.13779	-0.28713	-0.52338	0.28184	0.86574	0.60071	0.94723	-0.30108	-0.47725	0.2495	0.8975	0.63319	0.96572	-0.10146	-0.19135	0.79508	0.982	0.84825	0.99998	0.093496	0.15524	0.89289	0.99511	0.87663	0.99996	0.69763	1.3127	0.10671	0.74117	0.1893	0.56539	0.55984	0.91918	0.28021	0.88146	0.358	0.71462
Ankrd37	4	-0.36135	-0.04933	0.17256	-0.16761	-0.4475	0.45859	0.91967	0.65451	0.95545	0.19374	0.53079	0.84368	0.98783	0.59556	0.9602	-0.29196	-0.7892	0.32759	0.91001	0.42999	0.99998	-0.24263	-0.67015	0.41477	0.92695	0.50276	0.99996	0.45935	1.2402	0.34828	0.89907	0.21492	0.58587	0.28679	0.79041	0.68456	0.97021	0.42929	0.7606
Ankrd39	4	0.37252	0.155025	0.108999	0.26521	0.84659	0.57389	0.95017	0.39722	0.92053	-0.10731	-0.28431	0.5225	0.96296	0.77618	0.98423	0.12435	0.40595	0.51075	0.95794	0.68478	0.99998	-0.030675	-0.083263	0.81572	0.9883	0.93364	0.99996	-0.063921	-0.2032	0.72396	0.98194	0.83898	0.94733	-0.17292	-0.46235	0.56001	0.95517	0.64383	0.86786
Ankrd40	4	0.1189	0.392632	-0.162289	-0.35031	-1.2364	0.2127	0.82666	0.21631	0.89431	-0.46921	-1.4943	0.11245	0.77175	0.13509	0.95279	-0.090848	-0.32024	0.82843	0.98712	0.74879	0.99998	-0.48348	-1.5471	0.16034	0.8121	0.12184	0.99996	-0.098831	-0.34816	0.66646	0.97332	0.72772	0.89918	0.063458	0.20313	0.92639	0.99346	0.83904	0.9482
Ankrd42	4	-0.55478	0.411777	-0.53577	-0.10272	-0.35941	0.57857	0.9504	0.71929	0.96512	0.45206	1.0615	0.34274	0.92106	0.28845	0.95279	0.070987	0.24941	0.66387	0.97747	0.80305	0.99998	-0.34079	-0.8021	0.28545	0.88537	0.42249	0.99996	0.39741	1.394	0.4405	0.93152	0.16331	0.53662	0.93318	2.198	0.036755	0.60049	0.027952	0.33081
Ankrd44	4	0.055896	-0.51613	-0.10237	0.00406	0.015738	0.8114	0.98131	0.98744	0.99876	-0.051836	-0.19939	0.62518	0.96624	0.84195	0.98896	-0.39887	-1.5553	0.18342	0.83746	0.11987	0.99998	0.11726	0.45558	0.83676	0.98956	0.64869	0.99996	-0.23309	-0.90247	0.47273	0.94517	0.36681	0.70287	-0.13072	-0.50511	0.61736	0.96338	0.61348	0.85164
Ankrd46	4	0.25333	0.25302	-0.05208	0.4382	1.0328	0.25449	0.85423	0.30169	0.90259	0.18487	0.43996	0.86371	0.98887	0.65997	0.96634	-0.35079	-0.83218	0.23756	0.87169	0.40531	0.99998	-0.60381	-1.4578	0.093996	0.73537	0.14489	0.99996	-0.40346	-0.93651	0.28667	0.88041	0.34901	0.68925	-0.35138	-0.83405	0.3584	0.91111	0.40425	0.74623
Ankrd49	4	0.05922	1.01819	0.447279	-0.26022	-0.44305	0.31752	0.88121	0.65773	0.95592	-0.31944	-0.65874	0.23105	0.88781	0.51006	0.95614	0.28051	0.49852	0.18286	0.83746	0.61812	0.99998	-0.73768	-1.548	0.05043	0.64541	0.12161	0.99996	0.51001	0.89181	0.28087	0.87889	0.37249	0.70637	0.062731	0.1314	0.92486	0.99345	0.89546	0.96442
Ankrd50	4	0.45322	-0.288485	-0.25335	0.48432	1.4565	0.19887	0.82037	0.14526	0.88381	0.0311	0.090179	0.79671	0.98374	0.92815	0.99289	0.033135	0.10055	0.77652	0.982	0.91991	0.99998	0.32162	0.96256	0.40089	0.92319	0.33577	0.99996	0.3417	1.0286	0.53215	0.95505	0.30366	0.65529	0.59505	1.7641	0.2429	0.86574	0.077718	0.43646
Ankrd52	4	-0.39828	-0.41184	-0.80952	-0.12588	-0.22281	0.53363	0.94064	0.82368	0.97908	0.2724	0.35416	0.67256	0.97002	0.72322	0.97998	0.10208	0.19215	0.57242	0.96717	0.84762	0.99998	0.51392	0.70361	0.14315	0.80087	0.48168	0.99996	-0.21916	-0.38991	0.49138	0.94735	0.6966	0.88887	0.59036	0.78952	0.24717	0.8665	0.42981	0.7606
Ankrd54	4	0.106689	0.36781	0.552523	-0.089761	-0.25394	0.60587	0.95433	0.79954	0.97644	-0.19645	-0.48755	0.37746	0.92899	0.62587	0.96463	-0.16475	-0.48017	0.6111	0.97167	0.6311	0.99998	-0.53256	-1.3712	0.12943	0.78554	0.1703	0.99996	-0.021887	-0.062538	0.79884	0.99003	0.95013	0.98528	-0.57441	-1.4286	0.19811	0.84226	0.15312	0.53806
Ankrd55	4	-0.133217	-0.470054	-0.22282	-0.12312	-0.38089	0.53912	0.94098	0.70329	0.96254	0.010097	0.027595	0.74994	0.98142	0.97799	0.99603	0.063816	0.20162	0.68583	0.97931	0.84021	0.99998	0.53387	1.4905	0.12638	0.78078	0.13608	0.99996	-0.63727	-1.9554	0.13817	0.78921	0.050541	0.39047	-0.41445	-1.1345	0.30354	0.89201	0.25658	0.6397
Ankrd6	4	-0.172664	-0.67139	-0.17873	0.087966	0.22393	0.98688	0.99774	0.82281	0.97908	0.26063	0.58741	0.69671	0.97453	0.55693	0.95697	-0.48197	-1.235	0.11311	0.80068	0.21682	0.99998	0.18942	0.43224	0.67089	0.96902	0.66557	0.99996	0.58289	1.4995	0.20299	0.84415	0.13374	0.5071	0.76162	1.7341	0.10793	0.75389	0.082907	0.44338
Ankrd63	4	0.73905	-0.321491	0.00424	0.88898	1.7052	0.010167	0.40845	0.088162	0.88163	0.14993	0.33309	0.94367	0.99267	0.73906	0.98236	-0.065491	-0.12543	0.90743	0.99294	0.90019	0.99998	0.256	0.57469	0.52656	0.94613	0.5655	0.99996	0.57537	1.1022	0.21097	0.85128	0.27036	0.62997	0.57113	1.2787	0.2677	0.8772	0.20101	0.58809
Ankrd9	4	-0.216508	-0.01269	0.604946	-0.26958	-1.0285	0.30415	0.87605	0.30373	0.90291	-0.053072	-0.17085	0.62274	0.96624	0.86434	0.98971	0.21961	0.84182	0.28646	0.8927	0.39989	0.99998	0.2323	0.75347	0.57501	0.95257	0.45117	0.99996	-0.048254	-0.18418	0.75212	0.98759	0.85387	0.95207	-0.6532	-2.1065	0.1582	0.81566	0.035163	0.35691
Anks1	4	-0.090123	-0.13746	-0.04902	0.064687	0.20013	0.9572	0.99703	0.84138	0.98118	0.15481	0.46797	0.93295	0.99251	0.63981	0.96572	0.14729	0.46703	0.44944	0.94572	0.64048	0.99998	0.28475	0.8805	0.468	0.93643	0.37859	0.99996	-0.81525	-2.4707	0.080575	0.70524	0.013486	0.26422	-0.76623	-2.2978	0.11265	0.76257	0.021572	0.3102
Anks3	4	-0.274024	0.531419	-0.30826	0.068296	0.22512	0.96518	0.99703	0.82188	0.97908	0.34232	1.0482	0.53312	0.96345	0.29454	0.95279	0.0094588	0.03136	0.851	0.98722	0.97498	0.99998	-0.52196	-1.6087	0.1365	0.79433	0.10768	0.99996	-0.68823	-2.2528	0.11774	0.76117	0.024272	0.32334	-0.37997	-1.1613	0.33318	0.90363	0.24554	0.62922
Ankzf1	4	-0.11498	-0.324726	0.403874	0.34742	1.1442	0.39988	0.90625	0.25253	0.89431	0.4624	1.3314	0.32728	0.91893	0.18306	0.95279	-0.045396	-0.15045	0.97301	0.99891	0.88041	0.99998	0.27933	0.82018	0.47873	0.93879	0.41212	0.99996	0.34533	1.1392	0.5259	0.95358	0.25461	0.61854	-0.058544	-0.16846	0.72853	0.97483	0.86623	0.95534
Anln	4	0.28877	0.611281	0.47441	0.60308	1.0986	0.091556	0.72016	0.27192	0.89431	0.31431	0.53256	0.58792	0.96624	0.59434	0.95995	-0.061079	-0.11104	0.92085	0.99332	0.91159	0.99998	-0.67236	-1.1447	0.069341	0.69627	0.25232	0.99996	0.74462	1.3558	0.081745	0.70524	0.17515	0.54957	0.27021	0.46038	0.71262	0.97234	0.64524	0.86875
Ano10	4	-0.02216	0.30705	0.19976	-0.12786	-0.45328	0.53053	0.94019	0.65035	0.95485	-0.1057	-0.31356	0.52524	0.96296	0.75385	0.98236	-0.1409	-0.51256	0.67841	0.97931	0.60826	0.99998	-0.44795	-1.3567	0.18753	0.83048	0.17488	0.99996	0.29819	1.0756	0.60724	0.96823	0.2821	0.63987	0.09843	0.29638	0.98836	0.99928	0.76694	0.92069
Ano6	4	0.27213	0.52983	0.22886	0.18482	0.48859	0.75309	0.97497	0.62513	0.95157	-0.08731	-0.2372	0.55894	0.96574	0.8125	0.98829	0.30442	0.80608	0.15368	0.83034	0.42019	0.99998	-0.22541	-0.61575	0.44283	0.93406	0.53806	0.99996	0.46942	1.2413	0.33344	0.89178	0.2145	0.58548	0.24056	0.65672	0.76376	0.97736	0.51136	0.80356
Ano8	4	-0.43562	-0.43593	0.21797	-0.25085	-0.85148	0.32993	0.8882	0.3945	0.91992	0.18477	0.59211	0.86406	0.98887	0.55378	0.95697	0.27457	0.93404	0.19099	0.83993	0.35029	0.99998	0.7105	2.2876	0.036399	0.60118	0.022164	0.88794	0.70083	2.3833	0.10538	0.74089	0.017158	0.28503	0.48286	1.5533	0.37532	0.91385	0.12035	0.49533
Anp32a	4	-0.368597	0.25005	-0.548898	-0.035507	-0.13032	0.71837	0.96945	0.89632	0.98558	0.33309	0.80729	0.55239	0.96468	0.4195	0.95614	0.10703	0.39333	0.55874	0.96474	0.69407	0.99998	-0.14302	-0.34752	0.58513	0.95433	0.7282	0.99996	-0.090318	-0.33103	0.68105	0.97609	0.74062	0.90574	0.45858	1.1143	0.40918	0.92288	0.26516	0.64906
Anp32b	4	-0.44948	0.54009	-0.80817	0.33098	0.9404	0.42946	0.91399	0.34701	0.91238	0.78046	1.6763	0.051599	0.67758	0.093684	0.95279	0.42505	1.2107	0.054191	0.69673	0.22601	0.99998	-0.11504	-0.24814	0.63601	0.96234	0.80402	0.99996	-0.16503	-0.46731	0.5681	0.96129	0.64028	0.86551	0.64314	1.3861	0.19297	0.84066	0.16571	0.55049
Anp32e	4	-1.01494	-0.0473593	-0.39696	-0.47607	-1.2785	0.11825	0.75527	0.20107	0.89431	0.53887	0.62587	0.22576	0.88239	0.5314	0.95614	-0.00042727	-0.0011701	0.88155	0.98999	0.99907	0.99998	0.046932	0.055427	0.99731	0.99893	0.9558	0.99996	0.19937	0.54164	0.78852	0.98842	0.58807	0.83701	0.59633	0.69997	0.24132	0.86518	0.48395	0.78912
Anpep	4	0.66049	0.08247	0.52206	0.31985	1.0335	0.45275	0.91967	0.30138	0.90259	-0.34064	-1.3594	0.20955	0.87235	0.17403	0.95279	0.2827	0.91697	0.17996	0.83746	0.35916	0.99998	0.20023	0.82632	0.64633	0.96278	0.40862	0.99996	0.21943	0.7088	0.75304	0.9876	0.47845	0.77665	-0.30263	-1.2221	0.40969	0.92288	0.22168	0.60692
Antkmt	4	-0.69757	-0.119566	-0.02708	-0.12794	-0.44632	0.53017	0.94019	0.65536	0.95565	0.56963	1.561	0.1917	0.85471	0.11852	0.95279	-0.14608	-0.51689	0.6626	0.97714	0.60523	0.99998	-0.026514	-0.073201	0.82548	0.98951	0.94165	0.99996	-0.1471	-0.51435	0.59397	0.96466	0.60701	0.84768	-0.12002	-0.32828	0.63332	0.96839	0.7427	0.91248
Antxr1	4	-0.11124	-0.52585	-0.37559	-0.39778	-1.3677	0.17096	0.79952	0.17141	0.89157	-0.28654	-1.019	0.26455	0.89851	0.30821	0.95279	-0.82752	-2.8515	0.015098	0.50424	0.0043516	0.99998	-0.30167	-1.0802	0.33405	0.90697	0.28007	0.99996	-0.57859	-1.9863	0.16705	0.81868	0.047005	0.38474	-0.203	-0.72518	0.5227	0.94979	0.46834	0.7824
Antxr2	4	-0.61138	0.206376	-0.304259	-0.57436	-2.6242	0.075441	0.69504	0.0086852	0.62128	0.03702	0.16133	0.80967	0.98524	0.87183	0.99036	-0.015374	-0.070393	0.93152	0.99533	0.94388	0.99998	-0.22175	-0.97287	0.44883	0.93406	0.33062	0.99996	-0.27996	-1.2787	0.41498	0.92393	0.201	0.57428	0.024299	0.10634	0.86254	0.99092	0.91531	0.97094
Anxa1	4	-0.01104	0.338858	-0.16253	0.36667	0.89648	0.36668	0.89567	0.36999	0.91292	0.37771	0.86164	0.46708	0.95173	0.38888	0.95614	0.060538	0.14914	0.6963	0.97931	0.88144	0.99998	-0.27832	-0.64479	0.36455	0.90873	0.51906	0.99996	0.45742	1.1214	0.35092	0.89988	0.26213	0.62335	0.61995	1.4351	0.21712	0.8537	0.15127	0.53598
Anxa11	4	0.172284	-0.16133	-0.15052	0.12434	0.28397	0.89563	0.99279	0.77643	0.97371	-0.047944	-0.095877	0.63261	0.96624	0.92362	0.99238	-0.39586	-0.92345	0.18611	0.8376	0.35577	0.99998	-0.23453	-0.48347	0.42774	0.92962	0.62877	0.99996	0.77804	1.8295	0.066341	0.6804	0.067324	0.42338	0.92856	1.922	0.03767	0.6024	0.054608	0.40048
Anxa2	4	-0.378793	-0.121721	-0.49945	0.057037	0.16254	0.94017	0.99703	0.87088	0.98187	0.43583	1.0127	0.36816	0.92762	0.31119	0.95279	-0.011601	-0.0331	0.91856	0.99297	0.97359	0.99998	0.11012	0.25741	0.85354	0.99249	0.79686	0.99996	0.38131	1.0873	0.46896	0.94306	0.27691	0.63398	0.88076	2.058	0.05104	0.63504	0.039588	0.37235
Anxa3	4	0.27868	0.021724	0.24933	-0.18198	-0.56929	0.4347	0.91507	0.56916	0.94467	-0.46066	-1.4189	0.11662	0.77804	0.15592	0.95279	0.11665	0.37419	0.53337	0.96256	0.70827	0.99998	0.094926	0.3004	0.88948	0.99511	0.76387	0.99996	-0.28686	-0.89887	0.407	0.92182	0.36872	0.70439	-0.53619	-1.6644	0.2187	0.8537	0.096025	0.46069
Anxa4	4	-0.28855	-0.43761	-0.07321	0.59028	1.2116	0.099131	0.72788	0.22568	0.89431	0.87883	1.6311	0.02552	0.56836	0.10287	0.95279	0.14408	0.29692	0.45742	0.94626	0.76653	0.99998	0.58169	1.0929	0.092014	0.73537	0.27445	0.99996	0.72508	1.4918	0.090946	0.71689	0.13574	0.50794	0.79829	1.4901	0.086371	0.71357	0.13619	0.51679
Anxa5	4	-0.395151	-0.0532	-0.58099	0.095329	0.35738	0.96894	0.99703	0.72081	0.96512	0.49048	1.5005	0.28631	0.90706	0.13349	0.95279	0.39417	1.4844	0.071781	0.7548	0.1377	0.99998	0.44737	1.3737	0.2125	0.84848	0.16953	0.99996	-1.0829	-4.0197	0.032586	0.54974	5.8269e-05	0.0090929	-0.50191	-1.5338	0.2404	0.86382	0.12509	0.50244
Anxa6	4	-0.174532	0.106828	0.169447	0.069868	0.25138	0.96889	0.99703	0.80152	0.97651	0.2444	0.92804	0.7326	0.98083	0.35339	0.9542	-0.023272	-0.085234	0.95628	0.99746	0.93208	0.99998	-0.1301	-0.49961	0.60932	0.95901	0.61735	0.99996	0.1206	0.43612	0.94378	0.99807	0.66275	0.87666	-0.048847	-0.18604	0.74333	0.97561	0.85241	0.95115
Anxa7	4	-0.3901	-0.20589	-0.66498	0.13362	0.41385	0.87347	0.9905	0.67898	0.95831	0.52372	1.1279	0.24478	0.89487	0.25937	0.95279	0.05361	0.16768	0.71603	0.97931	0.86683	0.99998	0.2595	0.56319	0.5195	0.94594	0.57331	0.99996	0.28746	0.89348	0.62605	0.96991	0.3716	0.7056	0.95244	2.0653	0.031823	0.58133	0.038893	0.37143
Anxa9	4	0.141786	0.074287	0.06972	0.021856	0.065011	0.85557	0.98791	0.94817	0.99308	-0.11993	-0.37811	0.50165	0.9602	0.70535	0.97744	0.1656	0.49484	0.401	0.92428	0.62071	0.99998	0.091313	0.28908	0.89695	0.99511	0.77252	0.99996	0.46321	1.3814	0.34284	0.89557	0.16716	0.54117	0.39349	1.2454	0.50689	0.94671	0.21298	0.60006
Aoah	4	-0.07629	0.6218	0.35868	-0.23001	-0.66235	0.36099	0.89484	0.50775	0.93634	-0.15372	-0.41036	0.44517	0.94514	0.68154	0.97285	0.11784	0.35645	0.52966	0.96137	0.72151	0.99998	-0.50396	-1.3926	0.14809	0.80087	0.16374	0.99996	0.14246	0.41964	0.90016	0.99608	0.67475	0.88046	-0.21622	-0.58513	0.50597	0.94671	0.55846	0.82961
Aoc2	4	-0.16059	0.48447	0.20751	-0.31151	-0.83817	0.25398	0.85363	0.40194	0.9239	-0.15092	-0.40469	0.44929	0.94533	0.68571	0.97339	0.37465	1.0476	0.085761	0.77306	0.29484	0.99998	-0.10982	-0.30154	0.64557	0.96278	0.763	0.99996	0.65955	1.8266	0.13284	0.78046	0.067765	0.425	0.45204	1.2357	0.41676	0.92445	0.21657	0.60291
Aopep	4	-0.145888	0.575188	0.205711	0.025742	0.074541	0.86594	0.9905	0.94058	0.99235	0.17163	0.45181	0.89345	0.99076	0.65141	0.96604	0.086168	0.25471	0.61807	0.97273	0.79894	0.99998	-0.48902	-1.3045	0.15673	0.809	0.19207	0.99996	-0.059309	-0.17207	0.73265	0.98389	0.86338	0.95573	-0.26502	-0.69799	0.44827	0.93206	0.48519	0.78942
Aox1	4	0.057812	-0.303555	-0.10468	0.032797	0.09903	0.88308	0.99139	0.92111	0.98976	-0.025015	-0.062355	0.67816	0.97188	0.95028	0.99401	0.030195	0.092631	0.78501	0.982	0.9262	0.99998	0.33375	0.85895	0.3798	0.91748	0.39037	0.99996	0.18009	0.54677	0.82512	0.99003	0.58454	0.83482	0.28477	0.72205	0.68761	0.97055	0.47027	0.78311
Aox3	4	-0.89365	0.086296	0.22101	-0.46613	-1.6305	0.12465	0.7641	0.103	0.88163	0.42752	1.3798	0.38142	0.92974	0.16764	0.95279	-0.066414	-0.23461	0.90433	0.99294	0.81451	0.99998	-0.15271	-0.49794	0.56652	0.95153	0.61853	0.99996	-0.40395	-1.4143	0.28611	0.88006	0.15728	0.53006	-0.62496	-1.9992	0.17203	0.82322	0.045583	0.38741
Ap1ar	4	-0.17566	-0.405492	-0.244722	-0.37298	-1.1157	0.19201	0.817	0.26456	0.89431	-0.19732	-0.57238	0.37644	0.92899	0.56706	0.95769	-0.090552	-0.271	0.82929	0.98712	0.78639	0.99998	0.31494	0.9173	0.41213	0.925	0.35899	0.99996	-0.1963	-0.58644	0.523	0.95314	0.55758	0.82195	0.048422	0.14098	0.90138	0.99206	0.88789	0.96225
Ap1b1	4	-0.12202	0.21932	0.543523	-0.68717	-0.54193	0.040364	0.58902	0.58787	0.94564	-0.56515	-1.4162	0.071018	0.7052	0.15672	0.95279	-0.28678	-0.22938	0.33684	0.91261	0.81857	0.99998	-0.5061	-1.2824	0.14732	0.80087	0.19971	0.99996	-0.039097	-0.031037	0.76814	0.98842	0.97524	0.99191	-0.58262	-1.4651	0.19425	0.84131	0.1429	0.52602
Ap1g2	4	-0.24772	-0.008933	0.254856	-0.55859	-2.0268	0.08144	0.70416	0.042687	0.88163	-0.31087	-1.1632	0.23918	0.89177	0.24474	0.95279	0.026337	0.10077	0.79645	0.982	0.91973	0.99998	0.03527	0.13654	0.96914	0.99729	0.89139	0.99996	0.014106	0.052688	0.86173	0.99373	0.95798	0.98733	-0.24075	-0.91306	0.47573	0.9407	0.36121	0.71758
Ap1m1	4	0.014013	-0.199367	-0.1969	0.050849	0.17204	0.92512	0.99695	0.8634	0.98175	0.036836	0.11376	0.80941	0.98524	0.90943	0.99209	-0.12337	-0.41912	0.72869	0.97931	0.67513	0.99998	0.075997	0.2367	0.93381	0.9952	0.81289	0.99996	-0.53671	-1.8069	0.18947	0.83248	0.070783	0.43039	-0.33981	-1.052	0.37029	0.91123	0.29279	0.67275
Ap1s1	4	0.34514	0.24752	-0.68221	0.08737	0.28935	0.98836	0.99774	0.77231	0.97371	-0.25777	-0.80828	0.2978	0.91289	0.41893	0.95614	-0.15896	-0.52854	0.62691	0.97283	0.59712	0.99998	-0.40648	-1.2959	0.2217	0.85623	0.19502	0.99996	-0.18341	-0.60637	0.541	0.95546	0.54427	0.81475	0.4988	1.5901	0.35626	0.91111	0.11182	0.48451
Ap1s2	4	1.15758	-0.355676	-0.48457	-0.16722	-0.39431	0.45895	0.91967	0.69335	0.96079	-1.3248	-3.3128	0.00061004	0.093023	0.00092379	0.33174	-0.41564	-1.0183	0.16654	0.8362	0.30853	0.99998	-0.059964	-0.16481	0.75044	0.98009	0.86909	0.99996	-0.28746	-0.68174	0.40598	0.92058	0.4954	0.78526	0.19711	0.5343	0.83931	0.9888	0.59314	0.84419
Ap1s3	4	-1.00092	-0.1274	-0.02165	-0.56852	-1.4996	0.077271	0.70133	0.13372	0.88273	0.4324	1.0293	0.37375	0.92863	0.30336	0.95279	-0.26118	-0.71361	0.38473	0.9212	0.47547	0.99998	-0.13378	-0.32733	0.60236	0.95815	0.74342	0.99996	0.23136	0.6267	0.72925	0.98351	0.53086	0.80594	0.25301	0.60817	0.7414	0.97541	0.54307	0.82049
Ap2a1	4	0.07858	-0.30763	-0.52693	0.18207	0.78226	0.75914	0.97512	0.43406	0.92906	0.10349	0.4185	0.9513	0.99389	0.67558	0.97079	-0.18636	-0.80562	0.55259	0.96474	0.42046	0.99998	0.12127	0.49754	0.82817	0.98951	0.61881	0.99996	-0.93398	-3.9493	0.053785	0.64573	7.8373e-05	0.010857	-0.40705	-1.6451	0.31	0.89492	0.099941	0.46825
Ap2a2	4	-0.390683	-0.112519	-0.336002	-0.051263	-0.23738	0.68329	0.96566	0.81236	0.97722	0.33942	1.5239	0.53886	0.96345	0.12753	0.95279	-0.15699	-0.73177	0.63169	0.97283	0.46431	0.99998	-0.044471	-0.20088	0.78552	0.98535	0.84079	0.99996	-0.23883	-1.1051	0.46515	0.94168	0.26913	0.6289	0.097172	0.4373	0.98602	0.99918	0.6619	0.87511
Ap2b1	4	-0.35571	-0.310584	0.04939	-0.22403	-1.0772	0.36907	0.89567	0.2814	0.89545	0.13168	0.50196	0.98551	0.99923	0.6157	0.96294	0.082826	0.39917	0.62864	0.97283	0.68977	0.99998	0.39341	1.508	0.28621	0.88663	0.13154	0.99996	0.24679	1.188	0.70073	0.97763	0.23482	0.60189	0.1974	0.75492	0.8388	0.9888	0.45029	0.7702
Ap2m1	4	1.17057	-0.236579	-0.17612	0.88364	1.1044	0.010472	0.40954	0.26943	0.89431	-0.28693	-0.30594	0.26425	0.89851	0.75965	0.98242	-0.21513	-0.2681	0.48284	0.9535	0.78862	0.99998	0.021449	0.024332	0.93839	0.9952	0.98059	0.99996	-0.6538	-0.79746	0.1306	0.7768	0.42519	0.742	-0.47768	-0.51462	0.25713	0.87351	0.60682	0.8492
Ap2s1	4	0.275363	0.16579	0.389337	0.33669	0.70945	0.41798	0.91151	0.47805	0.93596	0.061327	0.11323	0.85995	0.98887	0.90985	0.99209	0.27463	0.58792	0.19089	0.83986	0.55658	0.99998	0.10884	0.20531	0.85654	0.99299	0.83733	0.99996	0.48454	1.026	0.31361	0.89053	0.30489	0.65552	0.095203	0.1772	0.982	0.99866	0.85935	0.95273
Ap3b1	4	-0.02789	0.47861	0.76375	-0.5192	-1.3945	0.097758	0.7258	0.16317	0.88954	-0.49131	-1.5036	0.10142	0.75292	0.13268	0.95279	0.33542	0.92171	0.12119	0.80351	0.35668	0.99998	-0.14319	-0.4553	0.58492	0.95433	0.64889	0.99996	0.42862	1.1674	0.39286	0.91603	0.24306	0.60962	-0.33513	-1.0405	0.37517	0.91385	0.2981	0.675
Ap3d1	4	-1.04474	0.0839	0.645105	-0.77422	-1.9185	0.025723	0.53382	0.055045	0.88163	0.27052	0.62127	0.67704	0.97135	0.53442	0.95614	-0.21041	-0.53188	0.49398	0.95438	0.59481	0.99998	-0.29431	-0.68548	0.3434	0.90873	0.49304	0.99996	0.6194	1.5655	0.16796	0.8201	0.11746	0.48722	-0.025705	-0.059222	0.77942	0.97813	0.95278	0.98339
Ap3m1	4	-0.90584	-0.32694	0.40406	-0.62326	-1.3721	0.05775	0.64729	0.17002	0.89157	0.28258	0.63654	0.64908	0.96823	0.52442	0.95614	0.1195	0.2774	0.52509	0.95986	0.78147	0.99998	0.44644	1.0366	0.21346	0.84848	0.29991	0.99996	0.26257	0.59865	0.67185	0.97332	0.5494	0.81803	-0.14149	-0.31903	0.6016	0.96072	0.7497	0.91549
Ap3m2	4	-0.204572	-0.637585	-0.01644	-0.097712	-0.2535	0.58894	0.95242	0.79989	0.97644	0.10686	0.24203	0.95857	0.99504	0.80876	0.98752	0.034145	0.091627	0.77317	0.982	0.92699	0.99998	0.67173	1.6192	0.050379	0.64541	0.10541	0.99996	0.13977	0.36783	0.90499	0.99608	0.713	0.89487	0.15621	0.36091	0.90956	0.99244	0.71816	0.90066
Ap3s1	4	-0.204249	-0.814787	-1.22235	0.095601	0.37838	0.96828	0.99703	0.70515	0.96271	0.29985	0.78214	0.61497	0.96624	0.43413	0.95614	-0.084277	-0.33654	0.84805	0.98722	0.73647	0.99998	0.73051	1.9344	0.030502	0.57318	0.05306	0.99996	-0.91024	-3.5547	0.058665	0.66322	0.00037842	0.029473	0.31211	0.8195	0.64181	0.96839	0.4125	0.75084
Ap3s2	4	-0.45683	-0.208921	0.452465	-0.34149	-1.3522	0.22266	0.83642	0.17631	0.89157	0.11534	0.47015	0.97845	0.9985	0.63824	0.96572	-0.16436	-0.65168	0.61197	0.97167	0.51461	0.99998	0.044561	0.18292	0.99182	0.99842	0.85486	0.99996	0.010385	0.041127	0.85496	0.99286	0.96719	0.99022	-0.44208	-1.8032	0.28163	0.88146	0.071356	0.43027
Ap4b1	4	-0.709525	-0.247065	-0.25952	-0.6791	-2.6297	0.042448	0.59814	0.0085451	0.61798	0.030425	0.089299	0.79493	0.98327	0.92884	0.99289	-0.15097	-0.59817	0.64887	0.97593	0.54973	0.99998	0.096095	0.28875	0.88643	0.99482	0.77278	0.99996	-0.48493	-1.889	0.22236	0.85753	0.058891	0.4078	-0.22541	-0.66454	0.4956	0.94614	0.50635	0.80206
Ap4e1	4	0.329615	-1.13423	-0.45381	0.38168	0.70492	0.34177	0.89058	0.48086	0.93596	0.052065	0.12024	0.84022	0.9877	0.90429	0.99196	-0.46422	-0.86563	0.12521	0.80952	0.38669	0.99998	0.67001	1.6302	0.051141	0.64903	0.10306	0.99996	-0.17527	-0.31927	0.55279	0.95891	0.74952	0.90955	0.27854	0.65718	0.69885	0.97169	0.51106	0.80351
Ap4m1	4	0.17577	-0.415993	-0.18685	0.34516	1.0157	0.40389	0.90724	0.3098	0.90635	0.16939	0.50815	0.89879	0.99092	0.61135	0.96217	0.085087	0.25199	0.62152	0.97283	0.80105	0.99998	0.50108	1.515	0.15566	0.809	0.12976	0.99996	0.32673	0.96287	0.55762	0.95896	0.33561	0.67863	0.51358	1.5495	0.33771	0.90652	0.12127	0.4969
Ap4s1	4	-0.234203	0.02193	0.26721	0.060467	0.12796	0.9481	0.99703	0.89818	0.98614	0.29467	0.62311	0.62513	0.96624	0.53322	0.95614	0.20302	0.43689	0.32118	0.90839	0.66219	0.99998	0.18109	0.39127	0.68939	0.97288	0.6956	0.99996	-0.81479	-1.7143	0.080677	0.70524	0.086472	0.45208	-1.082	-2.2798	0.043058	0.61555	0.022621	0.31506
Ap5b1	4	0.27655	0.150796	0.121525	0.53371	1.7449	0.14671	0.78113	0.081003	0.88163	0.25716	0.61526	0.70484	0.97475	0.53839	0.95614	-0.062174	-0.20411	0.91831	0.99297	0.83827	0.99998	-0.21297	-0.5186	0.4618	0.93569	0.60404	0.99996	0.18388	0.59962	0.8178	0.99003	0.54876	0.81759	0.062355	0.15006	0.92436	0.99345	0.88072	0.96027
Ap5m1	4	-0.111	0.24727	0.63334	0.16443	0.4812	0.79955	0.97953	0.63037	0.95238	0.27543	0.74657	0.6658	0.97002	0.45532	0.95614	0.31032	0.94105	0.14676	0.82897	0.34668	0.99998	0.06305	0.17463	0.96386	0.997	0.86137	0.99996	-0.39186	-1.1327	0.29739	0.88723	0.25734	0.61954	-1.0252	-2.7262	0.051446	0.63688	0.0064063	0.17527
Ap5s1	4	0.075642	0.20882	-0.19325	0.17111	0.44002	0.7841	0.9778	0.65992	0.95592	0.095468	0.18963	0.93386	0.99251	0.8496	0.98918	-0.26037	-0.66953	0.3862	0.92197	0.50315	0.99998	-0.46919	-0.93717	0.17132	0.82015	0.34867	0.99996	0.71666	1.8462	0.095928	0.72089	0.064865	0.41931	0.90991	1.8205	0.042906	0.61555	0.068681	0.42512
Ap5z1	4	0.288966	0.70756	0.281266	0.25033	0.63085	0.6047	0.95404	0.52814	0.93844	-0.038636	-0.10616	0.6507	0.96823	0.91546	0.99236	0.05661	0.14378	0.70744	0.97931	0.88567	0.99998	-0.65095	-1.813	0.076407	0.7164	0.069829	0.99996	0.084486	0.21274	0.98749	0.99923	0.83153	0.94446	-0.19678	-0.54424	0.53093	0.94979	0.58628	0.84155
Apaf1	4	-0.022575	0.209172	-0.336509	0.059482	0.19965	0.94591	0.99703	0.84175	0.98118	0.082057	0.28619	0.90499	0.99181	0.77474	0.9839	0.20607	0.69742	0.31493	0.90604	0.48554	0.99998	-0.0031024	-0.011111	0.88048	0.99482	0.99114	0.99996	-0.011089	-0.037227	0.81831	0.99003	0.9703	0.99096	0.32542	1.1533	0.61919	0.96338	0.24878	0.63288
Apba1	4	0.11331	0.219026	-0.32563	-0.39852	-1.4545	0.17015	0.79952	0.1458	0.88381	-0.51183	-1.6397	0.092319	0.74888	0.10107	0.95279	-0.097634	-0.35889	0.80621	0.98246	0.71967	0.99998	-0.31666	-1.0421	0.31437	0.90147	0.29739	0.99996	0.14963	0.54849	0.88587	0.99544	0.58336	0.83383	0.47526	1.5617	0.3862	0.91851	0.11836	0.49296
Apba3	4	0.6439	-0.50711	-0.356338	0.51693	1.2199	0.16196	0.79352	0.2225	0.89431	-0.12697	-0.36099	0.48879	0.956	0.71811	0.9792	-0.08321	-0.1976	0.8513	0.98722	0.84336	0.99998	0.4239	1.2205	0.24188	0.86496	0.22227	0.99996	-0.064698	-0.1516	0.72269	0.98157	0.8795	0.96097	0.29164	0.83597	0.67551	0.96975	0.40317	0.74544
Apbb1	4	0.236937	0.053158	-0.680089	0.011157	0.04388	0.82858	0.98365	0.965	0.99513	-0.22578	-0.57742	0.33689	0.92106	0.56366	0.95746	-0.078772	-0.3179	0.86488	0.98838	0.75056	0.99998	-0.13193	-0.3478	0.60561	0.95815	0.72799	0.99996	-0.055199	-0.218	0.74013	0.98558	0.82743	0.94301	0.62489	1.643	0.21072	0.84714	0.10039	0.46862
Apbb1ip	4	-0.05469	-0.06826	-0.01453	0.68093	1.6562	0.052056	0.63665	0.097675	0.88163	0.73562	1.707	0.070103	0.70433	0.08783	0.95279	0.13061	0.31843	0.49316	0.95428	0.75016	0.99998	0.19887	0.46297	0.64964	0.96335	0.64339	0.99996	0.75036	1.8276	0.07905	0.70522	0.067613	0.42466	0.76489	1.7793	0.10528	0.74721	0.075196	0.43458
Apbb2	4	0.343842	0.07002	0.072669	-0.028248	-0.10623	0.73575	0.97302	0.9154	0.98892	-0.37209	-1.2678	0.18006	0.84023	0.20487	0.95279	0.22827	0.86423	0.27025	0.88515	0.38746	0.99998	0.15825	0.54638	0.74007	0.97882	0.5848	0.99996	-0.072101	-0.27121	0.70957	0.97949	0.78623	0.92615	-0.14477	-0.49703	0.59682	0.96072	0.61917	0.85404
Apbb3	4	-0.10754	0.43258	0.02095	0.37526	1.2515	0.35199	0.89253	0.21073	0.89431	0.4828	1.3836	0.29699	0.91275	0.16649	0.95279	-0.13657	-0.45848	0.69071	0.97931	0.6466	0.99998	-0.56915	-1.6345	0.11087	0.7704	0.10216	0.99996	0.32635	1.0905	0.55849	0.95914	0.27548	0.6336	0.3054	0.87709	0.65264	0.96839	0.38044	0.73139
Apc	4	0.18623	-0.58222	-0.58779	0.36184	0.94365	0.37456	0.89963	0.34535	0.912	0.17561	0.49485	0.8847	0.99026	0.6207	0.96399	-0.03171	-0.085216	0.98429	0.9998	0.93209	0.99998	0.55051	1.6173	0.11392	0.77293	0.10582	0.99996	-1.1652	-2.8281	0.025469	0.51527	0.0046823	0.15224	-0.57741	-1.6104	0.19709	0.84131	0.10732	0.47759
Apcdd1	4	-0.60778	0.00694	0.21502	0.16108	0.51031	0.80758	0.98058	0.60983	0.94837	0.76886	1.8455	0.056174	0.68383	0.064961	0.95279	0.32788	1.0638	0.12907	0.81434	0.28744	0.99998	0.32094	0.77838	0.40201	0.92319	0.43634	0.99996	-0.21525	-0.67852	0.49723	0.94943	0.49744	0.78619	-0.43027	-1.0214	0.29109	0.88554	0.30707	0.6809
Apcs	4	-0.12323	-0.186834	0.59383	0.15875	0.42246	0.81358	0.98167	0.67269	0.95727	0.28198	0.74031	0.65014	0.96823	0.45911	0.95614	-0.1231	-0.32873	0.72925	0.97932	0.74236	0.99998	0.063734	0.16852	0.96223	0.99668	0.86617	0.99996	0.20498	0.54601	0.77881	0.98842	0.58506	0.83487	-0.38885	-1.0198	0.32566	0.90136	0.30784	0.68148
Apeh	4	-0.32103	-0.5438	-0.42903	0.47633	2.107	0.20599	0.82157	0.035119	0.88163	0.79736	2.2046	0.045651	0.65788	0.027484	0.95279	0.23035	1.0182	0.26592	0.88048	0.30858	0.99998	0.77415	2.1454	0.020487	0.50818	0.03192	0.95724	-0.2453	-1.0822	0.45697	0.93822	0.27918	0.6365	0.18373	0.50854	0.86325	0.99092	0.61108	0.85107
Apex1	4	0.0662	0.112861	0.17951	0.49281	1.6032	0.18814	0.81395	0.10889	0.88163	0.42661	1.3426	0.38325	0.93069	0.17939	0.95279	0.20522	0.66709	0.31646	0.90666	0.50471	0.99998	0.092359	0.2936	0.89492	0.99511	0.76906	0.99996	0.30925	1.0046	0.58751	0.96421	0.31509	0.6629	0.12974	0.40954	0.95496	0.9964	0.68214	0.88554
Apex2	4	0.452439	-0.192828	-0.09283	-0.0018812	-0.0060968	0.79594	0.97881	0.99514	0.99955	-0.45432	-1.6459	0.12058	0.78336	0.099774	0.95279	-0.027358	-0.090169	0.97057	0.99891	0.92815	0.99998	0.16547	0.62419	0.72411	0.97631	0.5325	0.99996	-0.2325	-0.75193	0.4739	0.94517	0.45209	0.76089	-0.13967	-0.51495	0.60444	0.96072	0.60659	0.8492
Aph1a	4	0.10092	0.80436	0.88635	-0.31627	-0.9464	0.24864	0.84768	0.34395	0.91192	-0.41719	-1.493	0.146	0.81415	0.13544	0.95279	0.1977	0.59122	0.33115	0.91205	0.55437	0.99998	-0.60666	-2.1845	0.09303	0.73537	0.028923	0.9571	0.36722	1.098	0.49199	0.94735	0.2722	0.63093	-0.51913	-1.8655	0.22947	0.85579	0.06211	0.41377
Aph1b	4	-0.17638	-0.439585	-0.34255	0.10611	0.38596	0.94144	0.99703	0.69953	0.96188	0.28249	0.73492	0.64913	0.96823	0.46239	0.95614	-0.37446	-1.373	0.2095	0.85424	0.16974	0.99998	0.065125	0.17266	0.95969	0.99668	0.86292	0.99996	-0.18104	-0.65678	0.5441	0.95551	0.51132	0.79405	0.16151	0.42327	0.90067	0.99205	0.6721	0.8801
Aph1c	4	-0.54538	0.3034	0.26967	-0.06503	-0.1706	0.65482	0.95912	0.86454	0.98175	0.48035	1.1174	0.30034	0.91384	0.26384	0.95279	-0.28145	-0.73722	0.34589	0.91327	0.46099	0.99998	-0.58485	-1.3655	0.10254	0.7513	0.17208	0.99996	0.9584	2.5169	0.017945	0.46386	0.011838	0.24683	0.68873	1.6126	0.15729	0.81488	0.10682	0.4767
Apip	4	-0.41366	-0.072035	0.38936	-0.28602	-0.70201	0.2827	0.86574	0.48267	0.93596	0.12764	0.34569	0.99451	0.9998	0.72957	0.98024	-0.087932	-0.22247	0.83753	0.98712	0.82394	0.99998	-0.015897	-0.044196	0.84942	0.99211	0.96475	0.99996	-0.66484	-1.6232	0.12663	0.77295	0.10455	0.47008	-1.0542	-2.8161	0.046871	0.62626	0.0048608	0.14987
Aplf	4	0.32765	-0.015582	0.50444	0.17483	0.43223	0.77627	0.97685	0.66558	0.95592	-0.15282	-0.4552	0.44604	0.94517	0.64896	0.96604	0.061183	0.15331	0.69391	0.97931	0.87816	0.99998	0.076765	0.23345	0.93208	0.9952	0.81542	0.99996	0.478	1.1918	0.32261	0.89053	0.23336	0.6008	-0.02644	-0.079624	0.77851	0.9781	0.93654	0.97817
Apln	4	-0.270619	0.13218	0.459114	0.039901	0.1278	0.8996	0.99382	0.89831	0.98614	0.31052	1.1482	0.59509	0.96624	0.25091	0.95279	0.24314	0.79084	0.24315	0.87277	0.42904	0.99998	0.11096	0.41322	0.85166	0.99212	0.67944	0.99996	-0.017606	-0.056504	0.80677	0.99003	0.95494	0.9868	-0.47672	-1.7603	0.25759	0.87384	0.078351	0.43656
Aplp1	4	-0.28238	0.27635	-0.19668	0.28494	0.81999	0.52946	0.94019	0.41222	0.92545	0.56732	1.3267	0.1945	0.85978	0.18462	0.95279	0.43228	1.2859	0.050735	0.68613	0.19847	0.99998	0.15593	0.37131	0.74506	0.97981	0.7104	0.99996	0.49701	1.4524	0.2976	0.88723	0.1464	0.51851	0.69369	1.6426	0.15246	0.8095	0.10046	0.46862
Aplp2	4	-0.38546	-0.15531	-0.09564	0.03755	0.1102	0.89401	0.99279	0.91225	0.98848	0.42301	1.4665	0.38864	0.93107	0.14251	0.95279	0.10263	0.30274	0.57059	0.96652	0.76209	0.99998	0.25794	0.8992	0.52224	0.94595	0.36855	0.99996	0.40765	1.1996	0.42448	0.92396	0.23031	0.59791	0.50329	1.7515	0.35006	0.90961	0.079858	0.43854
Apmap	4	-0.65795	-0.166451	0.0367	-0.50704	-1.256	0.10345	0.73466	0.20911	0.89431	0.15091	0.34462	0.94174	0.99251	0.73038	0.98024	-0.082051	-0.20788	0.85471	0.98764	0.83532	0.99998	0.0844	0.1982	0.91388	0.99511	0.84289	0.99996	1.0456	2.6574	0.0086422	0.36481	0.007875	0.20286	1.0089	2.369	0.021555	0.53602	0.017837	0.29154
Apoa1	4	-0.43646	-0.300464	-0.57227	-0.16031	-0.61984	0.47034	0.92184	0.53537	0.93854	0.27615	0.84844	0.66402	0.97002	0.39619	0.95614	0.0099556	0.038691	0.84891	0.98722	0.96914	0.99998	0.31042	0.96028	0.42042	0.92752	0.33692	0.99996	-0.42975	-1.6579	0.2644	0.87176	0.097328	0.46243	0.14252	0.43928	0.9329	0.99485	0.66046	0.87485
Apoa2	4	0.08947	0.202818	0.568208	-0.27595	-0.4879	0.29571	0.87376	0.62562	0.9516	-0.36542	-0.63767	0.1856	0.8469	0.52369	0.95614	0.2751	0.50616	0.19033	0.83942	0.61274	0.99998	0.072282	0.13294	0.94164	0.99565	0.89424	0.99996	0.54117	0.98125	0.24727	0.86594	0.32647	0.67162	-0.027038	-0.048348	0.77779	0.97807	0.96144	0.98654
Apoa4	4	0.04319	0.552713	0.0145	-0.23203	-0.60399	0.35779	0.89473	0.54585	0.94147	-0.27522	-0.70689	0.27716	0.90218	0.47963	0.95614	0.037543	0.098121	0.76305	0.98162	0.92184	0.99998	-0.51517	-1.3533	0.14127	0.80075	0.17597	0.99996	0.49716	1.2983	0.29744	0.88723	0.19419	0.56928	0.48266	1.269	0.37563	0.91393	0.20442	0.59031
Apoa5	4	-0.0685637	-0.33925	0.0723662	0.0019733	0.0072024	0.8057	0.98055	0.99425	0.99955	0.070537	0.25441	0.88028	0.98937	0.79918	0.98631	0.02389	0.088551	0.80469	0.98246	0.92944	0.99998	0.36314	1.3291	0.33216	0.90526	0.1838	0.99996	0.0080562	0.029501	0.85196	0.99286	0.97647	0.99199	-0.06431	-0.23313	0.71801	0.9736	0.81566	0.93873
Apob	4	0.0434	0.251104	-0.48206	0.50717	1.3931	0.17213	0.80066	0.16359	0.88954	0.46377	1.2391	0.32556	0.91893	0.2153	0.95279	0.29507	0.81764	0.16481	0.8362	0.41356	0.99998	0.043966	0.11912	0.99014	0.99821	0.90518	0.99996	-0.01381	-0.037723	0.81409	0.99003	0.96991	0.99096	0.46825	1.2608	0.39622	0.92253	0.20737	0.59367
Apobec1	4	0.14084	-0.244692	-0.299429	-0.10416	-0.33433	0.57597	0.95017	0.73813	0.96872	-0.245	-0.80319	0.31351	0.91551	0.42187	0.95614	-0.049672	-0.16491	0.95887	0.99746	0.86902	0.99998	0.19502	0.67748	0.65833	0.96577	0.4981	0.99996	-0.052359	-0.16968	0.74511	0.98663	0.86526	0.95589	0.24707	0.84181	0.75177	0.9757	0.39989	0.74295
Apobec3	4	-0.18061	-0.278765	-0.273255	-0.43805	-1.7672	0.14132	0.77469	0.077191	0.88163	-0.25744	-1.1404	0.29826	0.91329	0.25411	0.95279	-0.28836	-1.1863	0.3343	0.91245	0.2355	0.99998	-0.0095946	-0.04312	0.86452	0.99357	0.96561	0.99996	-0.067785	-0.27634	0.71654	0.98011	0.78229	0.92403	0.20547	0.91975	0.8239	0.98475	0.3577	0.71462
Apobr	4	0.346274	-0.259748	0.44807	0.41518	1.2307	0.28972	0.86983	0.21845	0.89431	0.068906	0.19707	0.87621	0.98925	0.84378	0.98915	-0.19746	-0.59111	0.52499	0.95986	0.55445	0.99998	0.062288	0.18498	0.96579	0.99729	0.85324	0.99996	-0.70213	-2.0186	0.11275	0.75186	0.043533	0.37641	-1.1502	-3.1788	0.035484	0.59829	0.0014788	0.075954
Apoc1	4	0.21744	0.14472	0.79712	-0.18795	-0.50759	0.42591	0.91302	0.61174	0.94914	-0.40539	-0.91493	0.15363	0.81415	0.36023	0.9542	-0.73456	-2.0464	0.025672	0.58439	0.040719	0.99998	-0.87928	-2.0865	0.026587	0.54792	0.036936	0.96469	-0.47388	-1.2753	0.22917	0.86071	0.2022	0.5745	-1.271	-2.7393	0.02491	0.55373	0.0061565	0.17033
Apoc2	4	-0.24598	0.302411	-0.6125	0.11604	0.51068	0.91678	0.99682	0.60957	0.94837	0.36202	0.97705	0.49377	0.95857	0.32855	0.95279	0.38137	1.701	0.080372	0.76733	0.088947	0.99998	0.078959	0.21482	0.92685	0.9952	0.82991	0.99996	-0.36801	-1.6101	0.32057	0.89053	0.10737	0.47484	0.24449	0.66249	0.75655	0.97619	0.50766	0.8024
Apoc3	4	-0.31909	0.87908	0.62962	0.30186	0.90752	0.49209	0.92872	0.36413	0.91246	0.62095	1.629	0.14417	0.81415	0.1033	0.95279	-0.18532	-0.56283	0.55503	0.96474	0.57355	0.99998	-1.0644	-2.7831	0.011133	0.40858	0.0053836	0.51912	-0.42308	-1.2593	0.26948	0.87442	0.20792	0.57915	-1.0527	-2.7192	0.047024	0.62626	0.006544	0.17707
Apoc4	4	-0.086103	0.109109	-0.23217	0.064447	0.25108	0.95654	0.99703	0.80175	0.97651	0.15055	0.60495	0.9424	0.99251	0.54521	0.95697	-0.079141	-0.3104	0.86396	0.98838	0.75625	0.99998	-0.18825	-0.7644	0.50369	0.94185	0.44463	0.99996	0.03714	0.14489	0.90214	0.99608	0.8848	0.96362	0.26931	1.09	0.71405	0.97238	0.2757	0.65961
Apof	4	-1.43516	-0.010852	-0.28233	-0.43974	-1.346	0.14061	0.77469	0.1783	0.89157	0.99542	2.1678	0.0093539	0.39655	0.030177	0.95279	-0.034757	-0.1081	0.99405	0.9998	0.91391	0.99998	-0.023905	-0.052163	0.83133	0.98951	0.9584	0.99996	0.1265	0.39068	0.93132	0.99733	0.69604	0.88875	0.40883	0.89063	0.48239	0.94368	0.37313	0.72612
Apoh	4	-0.415656	-0.19534	-0.19375	-0.37715	-1.201	0.1886	0.81395	0.22975	0.89431	0.038506	0.10294	0.81313	0.98524	0.91801	0.99236	-0.3537	-1.1332	0.23476	0.86943	0.25713	0.99998	-0.15836	-0.42909	0.5563	0.95085	0.66785	0.99996	-0.27336	-0.87177	0.42275	0.92396	0.38334	0.71472	-0.07961	-0.21388	0.69346	0.97169	0.83064	0.9449
Apol10b	4	-0.289619	0.33948	0.30514	-0.26631	-0.48218	0.30888	0.87606	0.62968	0.95221	0.023309	0.040908	0.77917	0.98142	0.96737	0.99565	0.21277	0.39612	0.30065	0.90043	0.69202	0.99998	-0.12671	-0.2249	0.61517	0.95965	0.82206	0.99996	0.14334	0.26247	0.89843	0.99608	0.79296	0.92925	-0.1618	-0.28531	0.57435	0.95808	0.7754	0.92464
Apol6	4	-0.293672	-0.21145	-0.00818	0.0085876	0.024977	0.82151	0.98287	0.98007	0.99726	0.30226	0.79141	0.6109	0.96624	0.42871	0.95614	0.12331	0.36053	0.5136	0.95794	0.71845	0.99998	0.33476	0.88426	0.37807	0.91639	0.37656	0.99996	-0.11631	-0.338	0.64038	0.97186	0.73536	0.90363	-0.10813	-0.28358	0.65177	0.96839	0.77673	0.92494
Apol7a	4	0.36392	-0.18303	-0.25954	0.19452	0.8209	0.73026	0.97218	0.4117	0.92545	-0.1694	-0.48921	0.4193	0.93813	0.6247	0.96413	0.1683	0.71458	0.39434	0.92428	0.47487	0.99998	0.35133	1.0431	0.35047	0.90873	0.29691	0.99996	0.17093	0.72189	0.84276	0.99258	0.47036	0.77261	0.43047	1.267	0.44807	0.93206	0.20515	0.59119
Apol9b	4	0.509464	-0.12546	0.45232	0.56546	0.88333	0.1186	0.75583	0.37706	0.91303	0.055996	0.098307	0.84942	0.98876	0.92169	0.99236	0.30919	0.4916	0.14814	0.82902	0.623	0.99998	0.43465	0.78792	0.22825	0.85682	0.43074	0.99996	0.64254	1.0106	0.14727	0.80044	0.3122	0.66084	0.19022	0.33868	0.851	0.99092	0.73485	0.90822
Apold1	4	-0.78546	-0.27905	0.0127	-0.15334	-0.54938	0.48274	0.92689	0.58275	0.94556	0.63212	2.0005	0.13528	0.80853	0.045448	0.95279	-0.10914	-0.40143	0.77149	0.982	0.68811	0.99998	0.16991	0.54409	0.71455	0.9756	0.58638	0.99996	0.53258	1.9488	0.25677	0.87176	0.05132	0.39291	0.51988	1.6541	0.32977	0.90298	0.098101	0.46407
Apom	4	0.37481	0.0223	-0.4232	-0.12702	-0.278	0.53195	0.94064	0.78101	0.97451	-0.50183	-0.81207	0.097046	0.75088	0.41675	0.95614	-0.22867	-0.50785	0.45397	0.94572	0.61156	0.99998	-0.25097	-0.41967	0.40227	0.92319	0.67473	0.99996	0.8226	1.8309	0.049565	0.62944	0.06711	0.42293	1.2458	2.0947	0.002796	0.26316	0.036194	0.36104
Apon	4	-0.16655	-0.260908	0.19476	-0.36369	-1.1213	0.20055	0.82037	0.26217	0.89431	-0.19714	-0.53941	0.37675	0.92899	0.5896	0.95973	-0.27222	-0.86068	0.36262	0.91451	0.38942	0.99998	-0.011312	-0.032446	0.86066	0.99357	0.97412	0.99996	0.36167	1.1383	0.50089	0.95035	0.25499	0.6187	0.16691	0.46994	0.89319	0.99193	0.6384	0.86483
Apoo	4	0.10144	-0.411089	-0.592538	-0.2361	-0.91448	0.35163	0.89253	0.36047	0.91246	-0.33754	-0.93309	0.21229	0.87244	0.35077	0.9542	-0.50854	-1.9683	0.096792	0.79183	0.049033	0.99998	-0.097451	-0.27179	0.66875	0.9682	0.78578	0.99996	0.051502	0.19941	0.92664	0.99678	0.84194	0.94844	0.64404	1.7957	0.19267	0.84066	0.072548	0.43179
Apool	4	0.39921	0.55781	-0.42701	0.19817	0.58438	0.7203	0.9697	0.55896	0.94401	-0.20104	-0.60432	0.3709	0.92802	0.54563	0.95697	0.39447	1.1721	0.071527	0.7548	0.24117	0.99998	-0.16334	-0.49573	0.54868	0.95001	0.62008	0.99996	0.2025	0.59746	0.78395	0.98842	0.5502	0.8183	0.62951	1.9103	0.20543	0.84426	0.0561	0.40263
App	4	-0.175042	-0.62109	-0.10706	0.074038	0.26861	0.98063	0.99774	0.78823	0.9748	0.24908	0.64883	0.72248	0.97888	0.51645	0.95614	-0.34079	-1.2499	0.25042	0.8746	0.21134	0.99998	0.2803	0.74832	0.47689	0.93879	0.45426	0.99996	0.31488	1.1512	0.57831	0.96309	0.24963	0.61374	0.42194	1.1136	0.46124	0.93604	0.26546	0.64932
Appbp2	4	-1.39907	-0.32615	0.66117	-1.0339	-4.0443	0.0064054	0.34483	5.2469e-05	0.031979	0.36517	1.1382	0.48798	0.956	0.25502	0.95279	-0.15827	-0.62602	0.62844	0.97283	0.5313	0.99998	0.16788	0.53102	0.71781	0.97568	0.59541	0.99996	0.41802	1.6523	0.40994	0.92393	0.098465	0.46293	-0.24315	-0.75667	0.47323	0.94047	0.44925	0.76995
Appl1	4	-0.030729	0.174028	-0.50146	0.079421	0.2303	0.99212	0.99862	0.81786	0.97835	0.11015	0.24921	0.96691	0.99748	0.8032	0.98631	-0.099072	-0.28791	0.80199	0.98201	0.77342	0.99998	-0.2731	-0.62268	0.37151	0.9135	0.5335	0.99996	0.53484	1.5538	0.25408	0.87095	0.12022	0.49177	1.0363	2.3661	0.017284	0.50671	0.017978	0.29154
Appl2	4	0.21678	-0.446128	-0.15363	0.37133	0.92219	0.3585	0.89484	0.35643	0.91246	0.15455	0.37169	0.93356	0.99251	0.71013	0.97813	0.0038719	0.0096307	0.86732	0.98838	0.99232	0.99998	0.45	1.093	0.20843	0.848	0.27441	0.99996	0.12398	0.30735	0.93686	0.99778	0.75858	0.91368	0.27761	0.67158	0.70007	0.97169	0.50185	0.79953
Aprt	4	0.15591	0.473817	0.19536	-0.0602	-0.1662	0.66494	0.96052	0.868	0.9818	-0.21611	-0.46902	0.34858	0.92115	0.63905	0.96572	0.069557	0.19268	0.66855	0.97931	0.84721	0.99998	-0.40426	-0.89625	0.22383	0.85623	0.37012	0.99996	-0.49957	-1.3746	0.21417	0.85551	0.16927	0.54352	-0.69493	-1.509	0.1399	0.79847	0.13129	0.51173
Aptx	4	-0.07305	0.14695	0.072106	0.70009	1.6805	0.045448	0.60816	0.092864	0.88163	0.77314	1.825	0.054649	0.67758	0.067997	0.95279	0.32598	0.78616	0.13101	0.81628	0.43177	0.99998	0.17903	0.42376	0.6928	0.9735	0.67174	0.99996	-0.066944	-0.1594	0.71837	0.98059	0.87335	0.9591	-0.13905	-0.32839	0.60515	0.96072	0.74262	0.91248
Aqp11	4	-0.04994	-0.60809	-0.048794	0.18063	0.64967	0.76254	0.97512	0.51591	0.9364	0.23057	0.63088	0.76148	0.98142	0.52812	0.95614	0.24318	0.88446	0.243	0.87258	0.37645	0.99998	0.85127	2.3918	0.010472	0.39313	0.016765	0.80816	-0.080829	-0.29002	0.69559	0.9768	0.7718	0.91971	-0.032035	-0.088079	0.76966	0.97757	0.92981	0.97601
Aqp3	4	0.104879	-0.28964	-0.0084	-0.061341	-0.15417	0.66245	0.96039	0.87747	0.98223	-0.16622	-0.36732	0.42408	0.93974	0.71338	0.97813	-0.13921	-0.35164	0.68283	0.97931	0.72511	0.99998	0.15043	0.3392	0.75873	0.9803	0.73446	0.99996	1.0124	2.5627	0.011387	0.39547	0.010385	0.23427	1.0208	2.3009	0.019165	0.51989	0.021397	0.30903
Aqp8	4	-0.354943	0.02579	0.12548	-0.26925	-0.94319	0.30476	0.87605	0.34559	0.912	0.085693	0.28961	0.91353	0.99227	0.77212	0.9834	-0.48948	-1.7203	0.10798	0.8	0.085373	0.99998	-0.51527	-1.7516	0.14122	0.80075	0.07985	0.99996	-0.37605	-1.3166	0.31224	0.89053	0.18796	0.56316	-0.50153	-1.6946	0.24061	0.86384	0.090154	0.4531
Aqp9	4	-0.13991	0.169112	0.07972	0.19501	0.63643	0.72925	0.97202	0.52449	0.93796	0.33492	0.88028	0.54812	0.96468	0.37871	0.95614	-0.053308	-0.17735	0.94703	0.99743	0.85924	0.99998	-0.22242	-0.59232	0.44782	0.93406	0.55364	0.99996	0.37242	1.2272	0.48361	0.94685	0.21975	0.58938	0.2927	0.77524	0.67383	0.96975	0.43819	0.76464
Aqr	4	0.3448	0.3151	1.3223	0.07053	0.11124	0.97092	0.99703	0.91142	0.98848	-0.27427	-0.30768	0.27838	0.90218	0.75833	0.98238	-1.4985	-2.2848	0.00035585	0.10294	0.022324	0.99998	-1.8136	-1.9979	0.00045753	0.082569	0.045728	0.98076	-1.0759	-1.5632	0.033399	0.55396	0.11802	0.48835	-2.3982	-2.2759	0.0013726	0.19728	0.022854	0.31562
Araf	4	-0.529875	-0.352637	0.259032	0.006895	0.025864	0.81796	0.98206	0.97937	0.9969	0.53677	1.7583	0.22805	0.88516	0.0787	0.95279	-0.035027	-0.13373	0.99466	0.9998	0.89361	0.99998	0.31761	1.0543	0.40786	0.92497	0.29177	0.99996	0.34233	1.2973	0.5317	0.95505	0.19452	0.56985	0.083298	0.27298	0.96147	0.99642	0.78487	0.92828
Arap1	4	-0.23423	0.423749	-0.53031	0.29871	0.94252	0.4987	0.92942	0.34593	0.91229	0.53294	1.8986	0.23303	0.88803	0.057619	0.95279	0.061319	0.19594	0.69356	0.97931	0.84466	0.99998	-0.36243	-1.3039	0.26415	0.87525	0.19227	0.99996	-0.68012	-2.1025	0.12099	0.76616	0.035512	0.36187	-0.14981	-0.53031	0.5896	0.96072	0.59589	0.84531
Arap3	4	-0.88009	-0.48776	0.130406	-0.34048	-0.75766	0.22363	0.83731	0.44866	0.93404	0.53961	0.93036	0.22475	0.882	0.35218	0.9542	-0.10137	-0.23024	0.79538	0.982	0.8179	0.99998	0.38639	0.67966	0.29673	0.89254	0.49672	0.99996	0.12926	0.29022	0.92608	0.99678	0.77165	0.91971	-0.0011456	-0.001973	0.81735	0.98276	0.99843	0.99939
Arcn1	4	-0.18262	0.45112	0.4455	0.15063	0.24504	0.83234	0.9844	0.80643	0.97691	0.33325	0.49876	0.55178	0.96468	0.61795	0.96313	0.239	0.39835	0.25042	0.8746	0.69037	0.99998	-0.21212	-0.32516	0.46327	0.93569	0.74506	0.99996	-3.1073	-5.1665	0.00020335	0.068966	2.3854e-07	0.00014663	-3.5528	-5.2434	0.00030502	0.12	1.5766e-07	0.00010694
Arel1	4	0.91706	-0.35226	-0.56507	0.33899	0.69951	0.41406	0.91151	0.48423	0.93596	-0.57807	-1.7323	0.065935	0.69619	0.083215	0.95279	-0.11844	-0.24819	0.74333	0.98074	0.80398	0.99998	0.23382	0.73778	0.57181	0.95257	0.46065	0.99996	-0.74992	-1.5158	0.097961	0.72498	0.12956	0.50178	-0.18485	-0.56781	0.54552	0.9538	0.57016	0.83452
Arf1	4	0.595827	0.260549	-0.59304	0.59423	0.82352	0.097046	0.7258	0.41021	0.92532	-0.0015965	-0.001702	0.72554	0.97959	0.99864	1	0.27097	0.37633	0.19613	0.84181	0.70667	0.99998	0.010421	0.011563	0.91266	0.99511	0.99077	0.99996	0.76286	1.0578	0.073103	0.69595	0.29014	0.6464	1.3559	1.5213	0.00091505	0.17308	0.12817	0.50649
Arf3	4	0.37502	-0.495371	0.04029	-0.02127	-0.08344	0.75136	0.97474	0.9335	0.99143	-0.39629	-1.3385	0.16095	0.82405	0.18075	0.95279	-0.54917	-2.1763	0.076407	0.7614	0.029533	0.99998	-0.053799	-0.19031	0.76392	0.98051	0.84907	0.99996	0.49018	1.9502	0.30659	0.89008	0.051147	0.39273	0.44989	1.5772	0.41965	0.92459	0.11475	0.48807
Arf4	4	-0.160113	-0.01062	-0.61721	-0.17166	-0.41479	0.45214	0.91967	0.67829	0.95831	-0.011547	-0.023791	0.70434	0.97475	0.98102	0.99715	-0.15535	-0.37625	0.63662	0.97349	0.70673	0.99998	-0.14473	-0.3009	0.58218	0.95353	0.76349	0.99996	-0.36793	-0.88622	0.32068	0.89053	0.3755	0.70859	0.24928	0.51735	0.74831	0.97561	0.60491	0.84864
Arf5	4	0.42977	-0.10053	-0.451195	-0.14725	-0.53551	0.49347	0.92872	0.5923	0.9458	-0.57702	-1.7956	0.06629	0.69621	0.072557	0.95279	-0.19768	-0.71971	0.52427	0.95971	0.4717	0.99998	-0.09715	-0.30898	0.66931	0.96873	0.75733	0.99996	-0.087175	-0.3169	0.68588	0.97609	0.75132	0.91028	0.36402	1.1542	0.55478	0.95417	0.24842	0.63235
Arf6	4	-1.74851	-0.541547	0.11981	-0.75686	-2.2544	0.028417	0.55567	0.024174	0.85512	0.99165	1.8995	0.0097097	0.40421	0.057504	0.95279	0.067453	0.20789	0.67485	0.97931	0.83531	0.99998	0.609	1.1766	0.077779	0.71985	0.23936	0.99996	-0.60661	-1.8137	0.15327	0.8068	0.069724	0.42765	-0.72642	-1.3747	0.1278	0.78833	0.16924	0.55492
Arfgap1	4	0.06649	-0.005506	-0.08528	0.29848	0.82307	0.49931	0.92942	0.41047	0.92532	0.23199	0.63379	0.75863	0.98142	0.52622	0.95614	-0.060495	-0.16706	0.92247	0.99332	0.86733	0.99998	-0.054989	-0.15149	0.76107	0.98051	0.87959	0.99996	-0.60957	-1.6707	0.1518	0.80442	0.094774	0.46063	-0.52429	-1.4309	0.22642	0.85579	0.15247	0.53746
Arfgap2	4	-0.318444	-0.59748	-0.77132	-0.40517	-1.2013	0.16471	0.79368	0.22963	0.89431	-0.086726	-0.22201	0.56006	0.96574	0.82431	0.98896	-0.3337	-1.0028	0.26033	0.87903	0.31596	0.99998	0.26378	0.68307	0.51096	0.94289	0.49456	0.99996	-0.59195	-1.7525	0.16095	0.81344	0.079686	0.44285	0.17937	0.46245	0.86986	0.99092	0.64376	0.86786
Arfgap3	4	-0.96104	0.219883	-0.14238	-0.36809	-1.145	0.19643	0.82037	0.25219	0.89431	0.59295	1.6348	0.16888	0.83375	0.10209	0.95279	0.21583	0.6818	0.2948	0.8978	0.49536	0.99998	-0.0040529	-0.011225	0.87855	0.99482	0.99104	0.99996	0.23715	0.74364	0.71821	0.98059	0.45709	0.76394	0.37953	1.0492	0.53043	0.94979	0.29409	0.67347
Arfgef1	4	-0.63977	0.32188	-0.31232	-0.39327	-1.3253	0.17483	0.80182	0.18506	0.89431	0.2465	0.7389	0.72772	0.97982	0.45997	0.95614	0.16199	0.55002	0.40959	0.92778	0.58231	0.99998	-0.15989	-0.48627	0.55371	0.95013	0.62677	0.99996	-0.72547	-2.4369	0.10513	0.74089	0.014814	0.27388	-0.41315	-1.234	0.30431	0.89205	0.2172	0.60349
Arfgef2	4	0.305233	-0.322994	-0.04308	-0.016407	-0.063175	0.76219	0.97512	0.94963	0.99308	-0.32164	-1.2289	0.22886	0.88639	0.21912	0.95279	-0.26118	-1.0119	0.38473	0.9212	0.31157	0.99998	0.061814	0.24082	0.96706	0.99729	0.8097	0.99996	-0.39003	-1.4974	0.29907	0.88738	0.13429	0.50736	-0.34695	-1.336	0.36251	0.91111	0.18154	0.56779
Arfgef3	4	0.18161	0.40186	0.1149	-0.31879	-1.6301	0.24589	0.84714	0.10307	0.88163	-0.5004	-2.0935	0.097453	0.75088	0.036304	0.95279	0.28447	1.4661	0.17788	0.8362	0.14261	0.99998	-0.11739	-0.49404	0.63113	0.96132	0.62128	0.99996	0.30037	1.5429	0.60393	0.96721	0.12286	0.49503	0.18547	0.78015	0.85974	0.99092	0.4353	0.76396
Arfip2	4	-0.08896	-0.319124	-0.01119	0.51397	1.501	0.16522	0.79368	0.13337	0.88273	0.60293	1.6723	0.15912	0.82045	0.094469	0.95279	0.0013259	0.0038887	0.87601	0.98922	0.9969	0.99998	0.32045	0.90293	0.40257	0.92319	0.36657	0.99996	-0.25109	-0.7267	0.4499	0.93697	0.46741	0.7707	-0.2399	-0.66026	0.47684	0.94082	0.50909	0.80251
Arfrp1	4	-0.16204	0.03424	0.40676	-0.77382	-1.9022	0.025723	0.53382	0.057149	0.88163	-0.61178	-1.2866	0.056123	0.68383	0.19823	0.95279	-0.13801	-0.36001	0.68654	0.97931	0.71884	0.99998	-0.17225	-0.37466	0.53124	0.94819	0.70791	0.99996	-0.15876	-0.40023	0.57735	0.9628	0.68899	0.88603	-0.56552	-1.202	0.20233	0.84426	0.22936	0.61402
Arg1	4	0.439378	0.56814	1.15555	0.34844	1.1396	0.39795	0.9057	0.25445	0.89431	-0.090938	-0.35025	0.55157	0.96468	0.72615	0.98024	0.23026	0.75537	0.26613	0.88048	0.45003	0.99998	-0.33788	-1.3057	0.28921	0.88917	0.19167	0.99996	0.15619	0.51053	0.87337	0.99535	0.60968	0.84903	-0.99936	-3.8518	0.056072	0.65351	0.00011724	0.014801
Arglu1	4	-1.15963	-0.20088	-0.40793	-0.35648	-0.81793	0.2065	0.8218	0.4134	0.92576	0.80315	1.3287	0.044075	0.65604	0.18394	0.95279	-0.571	-1.3535	0.066951	0.74268	0.1759	0.99998	-0.37012	-0.61648	0.25616	0.87357	0.53758	0.99996	-0.54006	-1.2381	0.18764	0.83034	0.21567	0.58612	-0.13213	-0.21547	0.61553	0.96338	0.8294	0.94459
Arhgap1	4	-0.241611	-0.080863	0.05646	-0.060611	-0.10991	0.66387	0.96052	0.91248	0.98848	0.181	0.36356	0.87367	0.98925	0.71619	0.97813	-0.11088	-0.20462	0.766	0.982	0.83787	0.99998	-0.030017	-0.061278	0.81735	0.98846	0.95114	0.99996	0.65907	1.2146	0.13319	0.78046	0.22453	0.59262	0.60261	1.2265	0.23446	0.85901	0.22003	0.60593
Arhgap10	4	0.01949	-0.14626	0.25413	0.33965	0.98022	0.41284	0.91104	0.32698	0.91164	0.32016	1.018	0.57628	0.96574	0.30869	0.95279	0.31285	0.90641	0.14376	0.82512	0.36472	0.99998	0.45911	1.478	0.19958	0.84213	0.1394	0.99996	0.70967	2.0529	0.1003	0.72697	0.040086	0.36884	0.45554	1.4585	0.41264	0.92288	0.1447	0.52756
Arhgap11a	4	-0.03421	0.669649	0.37031	0.28839	0.75208	0.52153	0.9369	0.452	0.93404	0.3226	0.6812	0.5717	0.96574	0.49574	0.95614	0.044829	0.11792	0.74216	0.98074	0.90613	0.99998	-0.62482	-1.3285	0.086117	0.73537	0.184	0.99996	-0.53963	-1.3915	0.18779	0.83034	0.16406	0.53699	-0.90994	-1.8952	0.073357	0.69242	0.058066	0.4051
Arhgap12	4	-0.37987	0.28703	0.10821	0.26466	0.7756	0.57501	0.95017	0.43798	0.9296	0.64453	1.4131	0.12501	0.79068	0.15762	0.95279	0.15628	0.46378	0.42428	0.93536	0.64281	0.99998	-0.13075	-0.28778	0.6082	0.95901	0.77351	0.99996	0.22101	0.64874	0.75009	0.98756	0.51651	0.79751	0.1128	0.24766	0.98638	0.99918	0.8044	0.93461
Arhgap15	4	-0.33558	0.04594	0.76499	0.2766	0.80839	0.54756	0.94391	0.41887	0.92764	0.61218	1.8213	0.15078	0.81415	0.068564	0.95279	-0.4034	-1.1884	0.1791	0.83746	0.23467	0.99998	-0.44934	-1.3407	0.18642	0.82983	0.18	0.99996	0.35264	1.0367	0.51502	0.95136	0.29986	0.65318	-0.41235	-1.2242	0.30512	0.89249	0.22088	0.60623
Arhgap17	4	-0.363482	-0.55474	0.347456	-0.063182	-0.18084	0.65818	0.95912	0.85649	0.98175	0.3003	0.99863	0.61425	0.96624	0.31797	0.95279	-0.21628	-0.63464	0.48071	0.9535	0.52566	0.99998	0.33846	1.1535	0.37192	0.91404	0.24872	0.99996	0.27147	0.78906	0.65706	0.97332	0.43008	0.74433	-0.075986	-0.25324	0.70012	0.97169	0.80009	0.93237
Arhgap18	4	-0.0109	-0.00498	0.47956	0.21509	1.0651	0.68248	0.96543	0.28683	0.89596	0.22599	0.59673	0.77088	0.98142	0.55069	0.95697	0.14782	0.73158	0.44802	0.94571	0.46443	0.99998	0.1528	0.40642	0.75283	0.98009	0.68443	0.99996	-0.36684	-1.8117	0.32169	0.89053	0.070039	0.42854	-0.8464	-2.2292	0.088303	0.71836	0.025801	0.32514
Arhgap19	4	-0.11015	0.16896	-0.38822	-0.34381	-1.1788	0.22022	0.83308	0.23846	0.89431	-0.23366	-0.6388	0.32728	0.91893	0.52295	0.95614	-0.33968	-1.1784	0.25133	0.87473	0.23862	0.99998	-0.50864	-1.4191	0.146	0.80087	0.15587	0.99996	0.16173	0.55926	0.86218	0.99374	0.57599	0.83	0.54995	1.5365	0.29144	0.88554	0.12441	0.5014
Arhgap21	4	0.16256	-0.176532	0.18847	0.42894	0.90903	0.26882	0.86008	0.36333	0.91246	0.26638	0.7507	0.68573	0.9735	0.45284	0.95614	0.031078	0.066365	0.78288	0.982	0.94709	0.99998	0.20761	0.59477	0.63006	0.96132	0.552	0.99996	0.64666	1.3772	0.14295	0.79278	0.16845	0.54283	0.45819	1.3033	0.40969	0.92288	0.19247	0.57902
Arhgap22	4	-0.10625	-0.13476	-0.0971873	0.4842	1.902	0.19907	0.82037	0.057165	0.88163	0.59045	1.4286	0.17117	0.83472	0.15311	0.95279	0.11901	0.4737	0.52682	0.9606	0.63571	0.99998	0.25377	0.62031	0.53119	0.94819	0.53505	0.99996	-0.099511	-0.38774	0.66555	0.97332	0.69821	0.88962	-0.0023237	-0.0056136	0.81557	0.98276	0.99552	0.99831
Arhgap24	4	0.09547	-0.64967	-0.162514	-0.17093	-0.642	0.45336	0.91967	0.52087	0.93709	-0.2664	-0.94891	0.28743	0.90797	0.34267	0.95356	-0.42246	-1.6045	0.15968	0.83537	0.10861	0.99998	0.22721	0.82993	0.58568	0.95452	0.40658	0.99996	-0.1285	-0.48425	0.62341	0.96991	0.62821	0.86036	0.034014	0.12286	0.87789	0.99169	0.90222	0.96738
Arhgap25	4	-0.214	0.175365	-0.38119	0.15046	0.77429	0.83265	0.9844	0.43876	0.92997	0.36446	1.3122	0.48915	0.956	0.18946	0.95279	0.18512	0.95346	0.35819	0.91451	0.34036	0.99998	0.009755	0.035215	0.91053	0.99511	0.97191	0.99996	-0.20488	-1.0522	0.5106	0.95035	0.2927	0.64737	0.17631	0.63605	0.87601	0.99169	0.52474	0.8109
Arhgap27	4	-0.90722	0.38309	0.3723	-0.60027	-1.5904	0.066341	0.67801	0.11174	0.88163	0.30695	0.81256	0.60261	0.96624	0.41647	0.95614	0.50721	1.3609	0.022114	0.56258	0.17354	0.99998	0.12412	0.33037	0.82126	0.98951	0.74112	0.99996	0.4266	1.1394	0.39586	0.91623	0.25452	0.61854	0.0543	0.14418	0.91124	0.99244	0.88536	0.96154
Arhgap29	4	0.19442	0.148267	0.526289	-0.15495	-0.43371	0.47959	0.92538	0.6645	0.95592	-0.34937	-0.92509	0.20187	0.86609	0.35492	0.9542	-0.060463	-0.1737	0.92258	0.99332	0.8621	0.99998	-0.20873	-0.57264	0.46861	0.93643	0.56689	0.99996	0.52596	1.5009	0.26313	0.87176	0.13337	0.50609	-0.00032897	-0.00088852	0.81882	0.98321	0.99929	0.9997
Arhgap30	4	-0.111588	-0.167213	-1.03985	-0.12279	-0.51	0.53968	0.94098	0.61005	0.94849	-0.011202	-0.031554	0.70474	0.97475	0.97483	0.99585	-0.015543	-0.064721	0.93203	0.99533	0.9484	0.99998	0.15167	0.42955	0.75573	0.98009	0.66752	0.99996	-0.024553	-0.102	0.79437	0.98952	0.91876	0.97467	1.0153	2.8755	0.019877	0.52381	0.0040341	0.13456
Arhgap31	4	-0.437334	-0.58304	-0.43438	0.092336	0.26442	0.97606	0.99735	0.79146	0.9748	0.52967	0.88628	0.23705	0.89077	0.37547	0.9549	0.20322	0.59097	0.32073	0.90839	0.55454	0.99998	0.78626	1.3407	0.018555	0.49394	0.18003	0.99996	0.33948	0.97777	0.53571	0.95506	0.32819	0.67311	0.77386	1.3098	0.10015	0.74144	0.19025	0.57646
Arhgap33	4	0.54205	-0.399738	0.142521	0.382	1.4583	0.34131	0.89029	0.14474	0.88381	-0.16005	-0.55111	0.43541	0.94495	0.58156	0.9581	-0.016318	-0.062217	0.93473	0.9959	0.95039	0.99998	0.38342	1.3356	0.30161	0.89357	0.1817	0.99996	-0.049509	-0.18864	0.74948	0.98756	0.85037	0.9509	-0.19203	-0.66472	0.53698	0.95073	0.50623	0.80206
Arhgap35	4	0.27832	0.221	0.48328	0.63751	1.2519	0.071628	0.68829	0.21062	0.89431	0.35919	0.85575	0.49931	0.95989	0.39214	0.95614	0.02549	0.050181	0.79945	0.982	0.95998	0.99998	-0.19551	-0.47208	0.49108	0.93879	0.63687	0.99996	0.30971	0.60699	0.58665	0.96421	0.54386	0.81461	-0.17357	-0.41315	0.5595	0.95517	0.67949	0.88464
Arhgap39	4	-0.37722	0.07389	-0.61122	0.41838	1.0532	0.28478	0.86585	0.29227	0.89867	0.7956	1.4287	0.046363	0.65873	0.1531	0.95279	0.35455	0.90178	0.10386	0.79805	0.36718	0.99998	0.28066	0.51216	0.47588	0.93807	0.60854	0.99996	0.17169	0.43157	0.84109	0.99256	0.66605	0.87757	0.78291	1.4186	0.09547	0.73287	0.15602	0.54031
Arhgap4	4	0.229219	0.14547	-0.36375	-0.00035131	-0.00087559	0.79971	0.97953	0.9993	1	-0.22957	-0.54838	0.33201	0.9205	0.58343	0.9581	-0.10596	-0.2671	0.78105	0.982	0.78939	0.99998	-0.25143	-0.6158	0.40176	0.92319	0.53803	0.99996	0.24093	0.60367	0.7115	0.97949	0.54606	0.81548	0.60468	1.48	0.23222	0.85674	0.13888	0.52118
Arhgap44	4	0.63193	-0.082878	-0.24227	0.29002	1.0984	0.51802	0.93589	0.27204	0.89431	-0.34191	-1.1968	0.20843	0.87195	0.23137	0.95279	0.059302	0.22493	0.69941	0.97931	0.82203	0.99998	0.14218	0.50145	0.77754	0.98287	0.61606	0.99996	-1.1962	-4.4919	0.02313	0.50891	7.0583e-06	0.0019555	-0.95393	-3.3472	0.063647	0.67167	0.00081628	0.052879
Arhgap45	4	-0.714468	-0.67988	-0.18288	-0.65184	-1.7502	0.049057	0.62155	0.080083	0.88163	0.062628	0.16297	0.86325	0.98887	0.87054	0.99018	-0.43632	-1.2345	0.14748	0.82897	0.217	0.99998	0.24356	0.66122	0.55168	0.95013	0.50847	0.99996	0.4921	1.3933	0.30436	0.88935	0.16352	0.53662	0.67498	1.8144	0.16756	0.82322	0.069618	0.42599
Arhgap5	4	0.0995	0.39591	0.04609	0.61002	1.5773	0.087947	0.71784	0.11473	0.88163	0.51052	1.2701	0.26155	0.89851	0.20406	0.95279	0.28302	0.73314	0.17966	0.83746	0.46347	0.99998	-0.11289	-0.2815	0.64028	0.96278	0.77833	0.99996	0.59098	1.5282	0.19399	0.83523	0.12647	0.49975	0.54489	1.3586	0.29851	0.88943	0.17426	0.56003
Arhgap6	4	0.196481	-0.371978	-0.375848	0.27728	0.84123	0.54603	0.94348	0.40022	0.92271	0.080799	0.18987	0.90189	0.99168	0.84941	0.98918	0.040532	0.12481	0.75502	0.98162	0.90067	0.99998	0.41251	0.99225	0.25754	0.87465	0.32107	0.99996	-0.34111	-1.025	0.34833	0.89907	0.30537	0.65584	0.034738	0.082316	0.87876	0.99169	0.9344	0.97792
Arhgap8	4	-0.29883	-0.125615	0.40655	-0.84294	-2.1956	0.017335	0.48438	0.028119	0.8752	-0.54411	-1.2173	0.079152	0.72723	0.22349	0.95279	-0.15151	-0.41009	0.64745	0.97593	0.68174	0.99998	-0.025895	-0.05921	0.82695	0.98951	0.95279	0.99996	0.54556	1.472	0.24254	0.86554	0.14103	0.51344	0.13901	0.31632	0.93945	0.9964	0.75176	0.91583
Arhgap9	4	0.62853	-0.30791	0.01261	0.34881	1.0296	0.39688	0.90475	0.30318	0.90285	-0.27972	-0.84418	0.27202	0.90003	0.39857	0.95614	-0.12542	-0.37321	0.72299	0.97931	0.70899	0.99998	0.18249	0.57475	0.68604	0.97288	0.56546	0.99996	0.14879	0.43884	0.88775	0.99544	0.66078	0.87576	0.13618	0.42078	0.94428	0.9964	0.67392	0.88131
Arhgdia	4	-0.19502	0.39145	0.181584	0.10544	0.38711	0.94271	0.99703	0.69867	0.96188	0.30046	1.002	0.614	0.96624	0.31633	0.95279	0.11425	0.43475	0.53927	0.96349	0.66374	0.99998	-0.2772	-0.93863	0.36567	0.90873	0.34792	0.99996	0.11013	0.40848	0.96528	0.99906	0.68292	0.88421	-0.071454	-0.23875	0.70647	0.97169	0.8113	0.93717
Arhgdib	4	-0.13716	-0.501863	-0.4126	0.11366	0.37556	0.92263	0.99682	0.70724	0.96298	0.25082	0.90703	0.71842	0.9782	0.36439	0.9542	-0.56011	-1.8497	0.071882	0.7548	0.064363	0.99998	-0.058247	-0.2116	0.75426	0.98009	0.83242	0.99996	-0.18429	-0.60789	0.54014	0.95546	0.54326	0.81427	0.22831	0.82819	0.784	0.97918	0.40756	0.7478
Arhgdig	4	0.0641855	-0.281159	0.13901	0.0042895	0.014805	0.81206	0.98157	0.98819	0.99876	-0.059896	-0.18347	0.60912	0.96624	0.85443	0.98937	-0.36208	-1.2607	0.2248	0.86654	0.20741	0.99998	-0.080921	-0.25054	0.7054	0.97474	0.80217	0.99996	0.38919	1.3542	0.45448	0.93769	0.17567	0.54974	0.25018	0.7724	0.74684	0.97561	0.43988	0.76511
Arhgef1	4	-0.71106	-0.027226	-0.71572	-0.18408	-0.76773	0.4318	0.91471	0.44265	0.93127	0.52698	1.3292	0.24091	0.89466	0.1838	0.95279	0.076014	0.3203	0.64847	0.97593	0.74874	0.99998	0.10324	0.26335	0.87011	0.99357	0.79228	0.99996	0.01194	0.04996	0.85766	0.99294	0.96015	0.98733	0.72766	1.8507	0.12933	0.78923	0.06421	0.41769
Arhgef10	4	0.73286	-0.89067	-0.07586	0.24432	0.59537	0.61852	0.95594	0.55159	0.94239	-0.48854	-0.9049	0.10274	0.7558	0.36552	0.9542	-0.62109	-1.5224	0.049362	0.68613	0.1279	0.99998	0.26958	0.51334	0.49865	0.94019	0.60771	0.99996	0.67204	1.6638	0.12404	0.76996	0.09615	0.46198	0.7479	1.4199	0.1157	0.76409	0.15564	0.54026
Arhgef10l	4	-0.489819	-0.73336	-0.21566	-0.071479	-0.25977	0.64196	0.95907	0.79504	0.9756	0.41834	1.0946	0.39632	0.93453	0.27367	0.95279	-0.25867	-0.95298	0.39027	0.92428	0.3406	0.99998	0.47469	1.2901	0.18225	0.82727	0.197	0.99996	-0.45996	-1.6643	0.2404	0.86554	0.096049	0.46161	-0.2443	-0.63564	0.4714	0.93961	0.52501	0.8109
Arhgef11	4	-0.44746	-0.61258	-0.03808	-0.22308	-0.59313	0.3706	0.89714	0.55309	0.94288	0.22438	0.59107	0.77424	0.98142	0.55447	0.95697	-0.02892	-0.07857	0.9756	0.99891	0.93737	0.99998	0.58366	1.5767	0.090844	0.73537	0.11487	0.99996	0.40927	1.1045	0.42204	0.92396	0.26938	0.62905	0.44735	1.194	0.42255	0.92509	0.23247	0.61627
Arhgef12	4	-0.6281	-0.59212	-0.06918	0.15124	0.61701	0.83097	0.98405	0.53723	0.93854	0.77934	1.6404	0.052056	0.67758	0.10092	0.95279	-0.24037	-0.98852	0.42799	0.93721	0.3229	0.99998	0.35175	0.74267	0.34955	0.90873	0.45768	0.99996	0.19424	0.79492	0.7991	0.99003	0.42666	0.74249	0.26342	0.55477	0.72401	0.9741	0.57905	0.83729
Arhgef15	4	-0.58206	-0.15128	-0.25327	-0.19005	-0.6029	0.42281	0.9128	0.54658	0.94153	0.39201	1.1143	0.44228	0.94508	0.26517	0.95279	0.13361	0.42631	0.48477	0.9535	0.66988	0.99998	0.28489	0.8161	0.4678	0.93643	0.41444	0.99996	0.49109	1.5643	0.30558	0.89008	0.11776	0.48786	0.74436	2.1289	0.11738	0.76664	0.033261	0.35063
Arhgef17	4	-0.21821	-0.564292	-0.67543	0.1276	0.3863	0.88796	0.99205	0.69927	0.96188	0.34581	0.945	0.5256	0.96296	0.34466	0.9542	-0.019172	-0.058862	0.94347	0.99705	0.95306	0.99998	0.54512	1.5247	0.11825	0.77607	0.12732	0.99996	-0.49076	-1.4729	0.21829	0.85658	0.14077	0.51285	0.18467	0.50781	0.86152	0.99092	0.61159	0.85121
Arhgef18	8	-0.00524	-0.224385	0.175843	-0.11797	-0.6202	0.37568	0.89968	0.53512	0.93854	-0.11273	-0.5522	0.32861	0.91896	0.58081	0.9581	-0.29549	-1.5637	0.17722	0.8362	0.11788	0.99998	-0.071105	-0.35561	0.61675	0.96044	0.72213	0.99996	0.27327	1.4436	0.5594	0.95938	0.14886	0.52185	0.097427	0.48295	0.93488	0.99545	0.62913	0.85904
Arhgef19	4	-0.25377	0.05539	0.485011	0.2859	1.223	0.52717	0.93945	0.22133	0.89431	0.53967	1.7303	0.2247	0.882	0.083573	0.95279	-0.13439	-0.58467	0.69768	0.97931	0.55877	0.99998	-0.18978	-0.61758	0.50079	0.9414	0.53685	0.99996	0.41576	1.795	0.41299	0.92393	0.072646	0.4326	-0.069251	-0.22099	0.71044	0.97234	0.8251	0.94271
Arhgef2	4	0.168104	-0.029086	-0.27554	0.035614	0.14067	0.88928	0.99212	0.88813	0.98449	-0.13249	-0.56072	0.47984	0.95489	0.57499	0.9581	0.012668	0.050555	0.84002	0.98712	0.95968	0.99998	0.041754	0.17922	0.98455	0.99804	0.85777	0.99996	0.10035	0.39745	0.98455	0.99923	0.69103	0.887	0.37589	1.608	0.53566	0.95016	0.10784	0.4783
Arhgef25	4	0.16436	-0.432988	0.64909	0.59656	1.5421	0.095725	0.72201	0.12306	0.88163	0.4322	0.92711	0.37395	0.92863	0.35387	0.9542	-0.53153	-1.3724	0.085252	0.77306	0.16994	0.99998	-0.098542	-0.21575	0.66682	0.96705	0.82918	0.99996	-0.74091	-1.8266	0.1003	0.72697	0.067761	0.425	-1.39	-2.8351	0.017894	0.50933	0.0045809	0.14534
Arhgef3	4	0.70803	-0.60215	0.539061	0.32536	0.73109	0.441	0.91782	0.46472	0.93596	-0.38267	-0.82643	0.17132	0.83472	0.40856	0.95614	0.1956	0.43947	0.33572	0.91261	0.66032	0.99998	0.79775	1.746	0.016979	0.47932	0.080817	0.99996	0.57949	1.3015	0.2066	0.84737	0.19308	0.56856	0.040429	0.087998	0.88836	0.99193	0.92988	0.97601
Arhgef33	4	0.9738	-0.03534	0.23987	0.57098	1.1048	0.11464	0.75292	0.26926	0.89431	-0.40282	-0.65125	0.1552	0.81457	0.51488	0.95614	-0.12922	-0.25117	0.71262	0.97931	0.80168	0.99998	-0.09388	-0.1586	0.67648	0.97117	0.87398	0.99996	0.45254	0.87622	0.35855	0.90369	0.38091	0.71286	0.21267	0.3538	0.81155	0.98276	0.72349	0.90283
Arhgef37	4	-0.287723	-0.311599	0.27264	-0.037883	-0.12754	0.71267	0.96877	0.89852	0.98614	0.24984	0.86042	0.72065	0.97874	0.38956	0.95614	0.061931	0.20981	0.69178	0.97931	0.83382	0.99998	0.37353	1.3116	0.31686	0.90184	0.18966	0.99996	0.46909	1.5858	0.33369	0.89178	0.11279	0.4818	0.19645	0.68177	0.84042	0.98893	0.49538	0.79574
Arhgef39	4	0.27617	-0.23512	-0.189602	0.55398	1.5872	0.12836	0.76536	0.11248	0.88163	0.27781	0.68344	0.66001	0.96976	0.49433	0.95614	0.20344	0.5834	0.32027	0.90839	0.55962	0.99998	0.43856	1.0963	0.22287	0.85623	0.27296	0.99996	-0.13492	-0.38496	0.61395	0.9695	0.70027	0.88986	0.054682	0.13511	0.91195	0.99244	0.89252	0.96349
Arhgef40	4	-0.45388	-0.04107	-0.55838	0.35104	1.2062	0.39388	0.90475	0.22775	0.89431	0.80492	1.5015	0.043465	0.65604	0.13323	0.95279	0.18562	0.64632	0.35728	0.91451	0.51807	0.99998	0.22669	0.42503	0.58696	0.95477	0.67082	0.99996	0.18934	0.65055	0.80819	0.99003	0.51534	0.79693	0.74772	1.3997	0.11575	0.76409	0.16162	0.54618
Arhgef6	4	0.0386	0.27033	-0.475221	0.26759	0.83236	0.5681	0.94953	0.40521	0.92429	0.22899	0.94262	0.76519	0.98142	0.34587	0.9542	0.13726	0.43349	0.47573	0.9535	0.66466	0.99998	-0.13307	-0.5501	0.60363	0.95815	0.58225	0.99996	-0.43344	-1.3319	0.26145	0.87176	0.18288	0.5574	0.041781	0.17242	0.89065	0.99193	0.86311	0.95431
Arhgef7	4	0.34475	-0.53392	-0.28116	-0.14673	-0.42795	0.49454	0.92929	0.66869	0.95615	-0.49148	-1.2693	0.10137	0.75292	0.20434	0.95279	-0.21447	-0.63084	0.48477	0.9535	0.52815	0.99998	0.31945	0.84129	0.4042	0.92443	0.40019	0.99996	0.46025	1.3521	0.34701	0.89839	0.17634	0.55027	0.74141	1.9481	0.11901	0.7686	0.051408	0.39736
Arhgef9	4	0.82335	-0.655458	-0.52644	0.30468	0.90348	0.48635	0.92778	0.36627	0.91246	-0.51867	-1.4422	0.08876	0.74257	0.14925	0.95279	0.037292	0.11243	0.76346	0.98176	0.91048	0.99998	0.69275	2.0079	0.042499	0.61936	0.04465	0.98076	-0.24555	-0.72082	0.45671	0.93822	0.47102	0.77328	0.28089	0.80454	0.69498	0.97169	0.42108	0.75569
Arid1a	4	0.8242	0.847755	0.3923	-0.3033	-0.68149	0.26226	0.85684	0.49556	0.93596	-1.1275	-2.6014	0.0019318	0.16964	0.0092846	0.95279	0.032585	0.076193	0.77856	0.982	0.93927	0.99998	-0.81517	-2.0156	0.03528	0.59316	0.043843	0.98005	0.10928	0.24931	0.96706	0.99906	0.80312	0.93326	-0.28302	-0.68626	0.4288	0.92775	0.49255	0.79424
Arid1b	4	-0.90991	-0.011813	0.28852	-0.44467	-0.86753	0.13721	0.77469	0.38565	0.91722	0.46524	0.76785	0.32301	0.9181	0.44258	0.95614	-0.022066	-0.045594	0.95287	0.99746	0.96363	0.99998	-0.010253	-0.01766	0.86315	0.99357	0.98591	0.99996	0.62251	1.2766	0.16476	0.81757	0.20175	0.5745	0.33399	0.55937	0.60526	0.96072	0.57591	0.83579
Arid2	4	0.15442	0.07781	-0.09231	0.26546	0.83168	0.57328	0.95017	0.40559	0.92449	0.11104	0.36333	0.96919	0.99812	0.71636	0.97813	0.33723	1.0563	0.11987	0.80068	0.29084	0.99998	0.25942	0.8578	0.51965	0.94594	0.391	0.99996	0.21382	0.66903	0.7628	0.98815	0.50348	0.78917	0.30613	1.0086	0.65111	0.96839	0.31318	0.68512
Arid3a	4	0.29433	0.06601	-0.184589	0.52414	1.7472	0.1553	0.78595	0.080607	0.88163	0.22981	0.68883	0.76351	0.98142	0.49093	0.95614	0.31314	1.0457	0.14341	0.82512	0.29569	0.99998	0.24713	0.74589	0.54461	0.94993	0.45573	0.99996	-0.17978	-0.59727	0.54583	0.95567	0.55033	0.8183	0.0048087	0.014452	0.82822	0.98578	0.98847	0.99678
Arid3b	4	0.171595	-0.311436	0.18322	-0.031675	-0.07735	0.72767	0.97199	0.93835	0.9919	-0.20327	-0.67543	0.368	0.92762	0.4994	0.95614	-0.30292	-0.75672	0.30725	0.90169	0.44922	0.99998	0.0085159	0.029347	0.90799	0.99511	0.97659	0.99996	0.73825	1.8497	0.084744	0.70712	0.064354	0.41811	0.55503	1.8995	0.28575	0.88374	0.057498	0.40437
Arid4a	4	-0.635563	-0.85452	0.25189	-0.69841	-1.4018	0.038178	0.58127	0.16096	0.88954	-0.062847	-0.13607	0.60373	0.96624	0.89177	0.99126	-0.4573	-0.94189	0.13014	0.81434	0.34625	0.99998	0.39722	0.86762	0.27996	0.88112	0.3856	0.99996	1.1699	2.4311	0.0032535	0.24806	0.015053	0.27539	0.91801	2.0038	0.041025	0.61555	0.045092	0.38704
Arid4b	4	0.627742	0.00869	-0.27318	0.018892	0.053945	0.8478	0.98747	0.95698	0.99432	-0.60885	-2.1289	0.056987	0.68383	0.033263	0.95279	-0.4482	-1.2857	0.13665	0.81727	0.19855	0.99998	-0.45689	-1.6132	0.18143	0.82727	0.1067	0.99996	0.27776	0.79649	0.64425	0.97256	0.42575	0.74222	0.55094	1.9465	0.29063	0.88554	0.05159	0.39736
Arid5a	4	0.310169	0.293402	0.22892	0.049069	0.15298	0.9209	0.99682	0.87841	0.98223	-0.2611	-0.79727	0.29414	0.91181	0.4253	0.95614	-0.0090477	-0.028891	0.91073	0.99294	0.97695	0.99998	-0.30245	-0.9402	0.33308	0.90572	0.34711	0.99996	0.59588	1.8931	0.18911	0.83248	0.058348	0.40725	0.36696	1.1386	0.54995	0.95412	0.25488	0.63788
Arid5b	4	-0.124952	0.45183	0.60347	-0.15087	-0.30783	0.48706	0.92778	0.75821	0.9719	-0.025918	-0.092779	0.67612	0.97087	0.92608	0.99289	-0.15213	-0.31996	0.64557	0.97572	0.749	0.99998	-0.60396	-2.1955	0.093996	0.73537	0.028129	0.94997	1.069	2.2628	0.0071679	0.35349	0.023648	0.31927	0.46553	1.6956	0.39993	0.92283	0.089971	0.45269
Arih1	4	-0.254832	0.03013	0.8022	-0.21471	-0.52178	0.383	0.90208	0.60182	0.94723	0.040122	0.071126	0.81587	0.98524	0.9433	0.99372	0.28473	0.70999	0.17772	0.8362	0.47771	0.99998	0.2546	0.45981	0.52915	0.94688	0.64565	0.99996	-1.4057	-3.3629	0.011184	0.39216	0.00077128	0.047495	-2.2079	-3.8789	0.0019826	0.21196	0.00010493	0.013702
Arih2	4	-0.53912	-0.63176	-0.24821	0.10032	0.40447	0.95603	0.99703	0.68586	0.95977	0.63944	1.9571	0.12877	0.79836	0.050334	0.95279	-0.11815	-0.47828	0.74414	0.98074	0.63245	0.99998	0.51361	1.5822	0.14356	0.80087	0.1136	0.99996	0.16845	0.67987	0.8479	0.9928	0.49659	0.78583	0.41666	1.2781	0.46993	0.93928	0.2012	0.58826
Arl1	4	-0.71886	0.69782	0.513504	-0.53491	-1.5158	0.092014	0.72016	0.12957	0.88207	0.18395	0.45295	0.86605	0.98887	0.65058	0.96604	-0.21619	-0.62337	0.48096	0.9535	0.53304	0.99998	-0.91401	-2.2629	0.022927	0.52558	0.02364	0.90566	-0.050236	-0.1437	0.74775	0.98731	0.88574	0.96388	-0.56374	-1.3823	0.2036	0.84426	0.16689	0.55199
Arl10	4	0.3939	-0.01107	-0.75958	0.24542	0.56984	0.61593	0.95506	0.56879	0.94467	-0.14848	-0.44253	0.45351	0.94684	0.6581	0.96619	-0.23427	-0.55866	0.44085	0.94169	0.57639	0.99998	-0.2232	-0.71585	0.44649	0.93406	0.47408	0.99996	-0.29462	-0.67239	0.39729	0.91694	0.50133	0.78806	0.46496	1.4763	0.40079	0.92283	0.13986	0.52273
Arl11	4	0.13003	-0.35449	0.04755	0.49532	1.1126	0.18545	0.81193	0.26587	0.89431	0.36529	0.66378	0.48788	0.956	0.50683	0.95614	0.13753	0.30964	0.47512	0.9535	0.75683	0.99998	0.49202	0.90516	0.1643	0.81513	0.36538	0.99996	0.40861	0.91723	0.42321	0.92396	0.35902	0.69584	0.36106	0.66018	0.55996	0.95517	0.50914	0.80251
Arl13b	4	0.00862	-0.141153	-0.19526	0.15009	0.58379	0.83361	0.9844	0.55936	0.94401	0.14147	0.42654	0.9636	0.99674	0.66971	0.97003	0.033507	0.133	0.7752	0.982	0.89419	0.99998	0.17466	0.53503	0.70291	0.97395	0.59263	0.99996	-0.63451	-2.4285	0.13934	0.78946	0.01516	0.27564	-0.43925	-1.3228	0.28341	0.88198	0.1859	0.57132
Arl15	4	-0.64085	-0.52963	-0.410243	-0.39733	-1.2694	0.17127	0.79957	0.20428	0.89431	0.24352	0.70702	0.73443	0.98083	0.47955	0.95614	-0.40791	-1.3192	0.17406	0.8362	0.1871	0.99998	0.12172	0.3585	0.82711	0.98951	0.71997	0.99996	0.047177	0.15195	0.91937	0.99678	0.87923	0.96085	0.45742	1.3407	0.4105	0.92288	0.18002	0.56662
Arl16	4	-0.23789	-0.90514	0.54268	0.21007	0.46191	0.69468	0.96721	0.64415	0.95438	0.44796	1.2113	0.3493	0.92115	0.22577	0.95279	-0.50357	-1.1159	0.099182	0.79183	0.26445	0.99998	0.40157	1.0982	0.2734	0.8782	0.27212	0.99996	0.73737	1.6482	0.085202	0.70712	0.099315	0.46367	0.19469	0.52826	0.84276	0.98944	0.59732	0.84537
Arl2	4	0.752597	0.55185	2.3639	0.67929	0.7445	0.052565	0.63709	0.45657	0.93507	-0.073307	-0.095814	0.5837	0.96577	0.92367	0.99238	1.0488	1.1905	5.0836e-05	0.035714	0.23384	0.99998	0.49695	0.66454	0.15968	0.81121	0.50634	0.99996	0.025896	0.027995	0.88282	0.99544	0.97767	0.9923	-2.338	-3.0538	0.0014743	0.19728	0.0022599	0.097758
Arl2bp	4	-0.12471	0.372054	-0.66045	-0.18449	-0.55134	0.43124	0.91413	0.5814	0.94549	-0.05978	-0.13864	0.60917	0.96624	0.88973	0.99065	-0.030726	-0.092559	0.98078	0.99974	0.92625	0.99998	-0.40278	-0.94255	0.2249	0.85682	0.34591	0.99996	-0.18865	-0.56419	0.53373	0.95506	0.57262	0.82813	0.4718	1.104	0.39108	0.92195	0.26961	0.6541
Arl3	4	-0.256602	0.01741	-0.30228	-0.052982	-0.15183	0.67999	0.96487	0.87932	0.98223	0.20362	0.55319	0.81999	0.98555	0.58014	0.9581	0.43401	1.2603	0.049667	0.68613	0.20758	0.99998	0.4166	1.1427	0.25194	0.87106	0.25317	0.99996	0.35488	1.0229	0.51136	0.95058	0.30635	0.65619	0.65716	1.7988	0.18245	0.83271	0.072057	0.43162
Arl4a	4	-0.83254	-0.43495	0.26503	-0.37406	-1.2576	0.19094	0.81546	0.20854	0.89431	0.45848	1.0594	0.33277	0.92055	0.28941	0.95279	-0.39463	-1.3276	0.18713	0.83823	0.18431	0.99998	0.04032	0.093353	0.9819	0.99778	0.92562	0.99996	-0.01713	-0.057599	0.80753	0.99003	0.95407	0.9867	-0.28216	-0.65297	0.42982	0.92801	0.51378	0.80498
Arl4c	4	0.11654	0.21021	0.25765	0.2819	0.58645	0.53642	0.94098	0.55757	0.94385	0.16536	0.45617	0.90819	0.99217	0.64827	0.96604	-0.19251	-0.40694	0.5382	0.96349	0.68405	0.99998	-0.40272	-1.1228	0.2249	0.85682	0.26152	0.99996	0.06683	0.13894	0.95394	0.99835	0.8895	0.96475	-0.19082	-0.52809	0.53836	0.95073	0.59743	0.84542
Arl4d	4	0.91071	0.2408	0.14201	-0.41369	-1.239	0.15891	0.78919	0.21535	0.89431	-1.3244	-3.7797	0.00061004	0.093023	0.00015701	0.11439	-0.34843	-1.0653	0.24071	0.87223	0.28674	0.99998	-0.58923	-1.74	0.10066	0.74727	0.081855	0.99996	-0.11128	-0.33654	0.64842	0.97329	0.73646	0.90419	-0.25329	-0.7424	0.46114	0.93604	0.45785	0.77554
Arl5a	4	0.131948	0.23131	-0.09045	-0.019822	-0.079342	0.75446	0.97497	0.93676	0.99179	-0.15177	-0.49865	0.44787	0.94533	0.61803	0.96314	-0.15868	-0.64297	0.62752	0.97283	0.52024	0.99998	-0.38999	-1.2965	0.23583	0.86229	0.19479	0.99996	0.49329	1.9952	0.30314	0.88935	0.046021	0.38262	0.58374	1.9414	0.25464	0.87201	0.052206	0.39773
Arl5b	4	0.05173	-0.63513	-0.142872	0.31465	1.0614	0.46342	0.9211	0.2885	0.89627	0.26292	0.72436	0.69219	0.97432	0.46884	0.95614	0.1	0.34072	0.57872	0.96717	0.73331	0.99998	0.73513	2.0528	0.029282	0.56458	0.040095	0.96655	-0.1867	-0.62617	0.53648	0.95511	0.5312	0.80608	-0.043828	-0.12109	0.75146	0.9757	0.90362	0.96783
Arl5c	4	0.05022	-0.087519	0.248833	0.60273	1.2834	0.091709	0.72016	0.19936	0.89431	0.55251	1.3955	0.21072	0.87235	0.16285	0.95279	0.048541	0.10477	0.73047	0.9798	0.91656	0.99998	0.13606	0.34604	0.79228	0.98653	0.72932	0.99996	0.26401	0.55994	0.66911	0.97332	0.57552	0.82965	0.015177	0.038367	0.84663	0.99019	0.96939	0.9889
Arl6	4	-0.05299	-0.70021	-0.17936	0.27199	0.98792	0.55778	0.94591	0.32319	0.91097	0.32498	0.96716	0.56764	0.96574	0.33346	0.95279	-0.38406	-1.4102	0.19867	0.84504	0.15847	0.99998	0.31615	0.9555	0.41025	0.925	0.33932	0.99996	0.15484	0.56384	0.87616	0.99535	0.57286	0.82816	0.3342	1.0018	0.605	0.96072	0.31644	0.6866
Arl6ip1	4	0.455967	0.0716782	0.170567	0.081527	0.25345	0.99715	0.99929	0.79992	0.97644	-0.37444	-1.1792	0.17762	0.83914	0.23834	0.95279	-0.0012748	-0.0039602	0.88414	0.98999	0.99684	0.99998	-0.072953	-0.23229	0.72248	0.97631	0.81632	0.99996	0.034607	0.10742	0.89731	0.99608	0.91445	0.97323	-0.13596	-0.43116	0.60973	0.96221	0.66635	0.87724
Arl6ip4	4	-0.08543	-0.46001	-0.52006	0.15756	0.53522	0.81607	0.98196	0.59249	0.9458	0.24299	0.54773	0.73555	0.98083	0.58388	0.9581	0.12388	0.42399	0.51233	0.95794	0.67157	0.99998	0.58389	1.3309	0.090794	0.73537	0.18324	0.99996	0.44395	1.514	0.3707	0.90804	0.13002	0.50258	0.96401	2.1933	0.029434	0.57498	0.028284	0.33208
Arl6ip5	4	0.14178	0.3193	-0.02047	-0.21544	-0.79137	0.38214	0.90208	0.42873	0.92906	-0.35722	-1.2286	0.19313	0.85679	0.21922	0.95279	-0.41034	-1.5325	0.17183	0.8362	0.12539	0.99998	-0.72964	-2.5657	0.05287	0.65037	0.010298	0.66201	0.38832	1.4483	0.4562	0.93822	0.14753	0.5199	0.40879	1.4426	0.48239	0.94368	0.14914	0.53305
Arl6ip6	4	0.15665	0.16517	-0.030668	-0.19845	-0.46779	0.41015	0.90997	0.63993	0.95388	-0.3551	-0.68326	0.19531	0.86031	0.49444	0.95614	-0.16442	-0.39498	0.61171	0.97167	0.69286	0.99998	-0.32959	-0.67997	0.29815	0.8928	0.49652	0.99996	0.086112	0.20432	0.98968	0.99923	0.83811	0.94711	0.11678	0.23515	0.97921	0.99866	0.81409	0.93818
Arl8a	4	-1.51052	-0.048456	-0.13184	-0.56452	-1.8008	0.07905	0.7041	0.071738	0.88163	0.946	2.5995	0.0152	0.47536	0.0093368	0.95279	-0.10104	-0.32909	0.7966	0.982	0.74209	0.99998	-0.052584	-0.14504	0.76671	0.98051	0.88468	0.99996	0.47091	1.5295	0.3312	0.89173	0.12615	0.49975	0.60275	1.6585	0.23441	0.85901	0.097211	0.4629
Arl8b	4	-0.167326	1.21342	0.43409	0.094244	0.23465	0.97133	0.99703	0.81448	0.97759	0.26157	0.60516	0.69488	0.97453	0.54508	0.95697	0.44141	1.1312	0.045295	0.67491	0.25796	0.99998	-0.77201	-1.8029	0.042753	0.62104	0.071399	0.99996	0.72479	1.8402	0.0912	0.71689	0.065739	0.42034	0.2907	0.68105	0.67719	0.96975	0.49584	0.79602
Armc10	4	-0.66516	-0.05454	-0.14105	-0.03728	-0.14431	0.7145	0.96877	0.88526	0.98434	0.62788	1.5532	0.13888	0.81095	0.12038	0.95279	0.11125	0.432	0.54791	0.96474	0.66574	0.99998	0.16579	0.41644	0.7234	0.97631	0.67709	0.99996	0.34241	1.3272	0.5317	0.95505	0.18444	0.55887	0.48346	1.2033	0.37441	0.91355	0.22886	0.61345
Armc2	4	-0.03072	-0.27515	-0.392125	-0.40036	-1.2458	0.16847	0.7974	0.21284	0.89431	-0.36964	-1.0653	0.18164	0.84213	0.28672	0.95279	-0.4302	-1.3777	0.15205	0.83034	0.16828	0.99998	-0.15505	-0.45675	0.5625	0.95144	0.64785	0.99996	-0.33147	-1.0407	0.35738	0.90369	0.29801	0.65153	0.060655	0.17756	0.92146	0.99337	0.85907	0.95265
Armc3	4	-0.47873	0.260448	0.30526	-0.2969	-1.2319	0.27025	0.86008	0.218	0.89431	0.18183	0.58556	0.87179	0.98925	0.55817	0.95697	-0.0072916	-0.030328	0.90458	0.99294	0.97581	0.99998	-0.26774	-0.86722	0.37893	0.9164	0.38582	0.99996	0.42416	1.7633	0.39967	0.918	0.077845	0.44051	0.1189	0.38429	0.97509	0.99866	0.70076	0.89376
Armc5	4	-0.66917	-0.117629	0.658318	-1.2269	-2.4958	0.0020843	0.18552	0.012568	0.71372	-0.55773	-1.0401	0.073763	0.71513	0.29829	0.95279	0.020561	0.046934	0.81445	0.98385	0.96257	0.99998	0.13819	0.2742	0.78771	0.98569	0.78393	0.99996	0.6571	1.4829	0.13461	0.7839	0.1381	0.51106	-0.0012177	-0.0023388	0.81719	0.98276	0.99813	0.9993
Armc6	4	0.29652	0.22741	2.7296	0.1122	0.25225	0.92563	0.99695	0.80085	0.97648	-0.18432	-0.16348	0.39632	0.93453	0.87014	0.99008	-0.81499	-1.8459	0.016522	0.51893	0.06491	0.99998	-1.0424	-0.94533	0.012252	0.42024	0.34449	0.99996	-1.0966	-2.2926	0.031773	0.5453	0.021871	0.31049	-3.8262	-2.1454	0.00020335	0.10256	0.031921	0.34579
Armc7	4	-0.05697	0.16457	-0.080738	-0.17196	-0.32574	0.45143	0.91967	0.74462	0.96933	-0.11499	-0.23247	0.50994	0.9611	0.81618	0.98841	0.29304	0.61346	0.1672	0.8362	0.53957	0.99998	0.12847	0.27249	0.81089	0.9867	0.78524	0.99996	0.059852	0.11692	0.94088	0.99807	0.90692	0.97029	0.14059	0.29071	0.9361	0.99594	0.77128	0.92268
Armc8	4	0.57482	-0.336429	0.07868	0.16872	0.62631	0.78903	0.97795	0.53111	0.93854	-0.4061	-1.786	0.15342	0.81415	0.074102	0.95279	-0.25171	-0.93653	0.40328	0.92428	0.349	0.99998	0.084719	0.37446	0.91251	0.99511	0.70807	0.99996	0.41367	1.5385	0.41604	0.92393	0.12392	0.49645	0.33499	1.48	0.60393	0.96072	0.13886	0.52118
Armc9	4	-0.28898	0.80013	0.18148	0.41513	1.2969	0.28977	0.86983	0.19468	0.89431	0.70411	1.4995	0.08632	0.73668	0.13375	0.95279	0.34717	1.0945	0.11092	0.80068	0.27375	0.99998	-0.45296	-0.97119	0.18372	0.82814	0.33145	0.99996	0.28904	0.90279	0.62341	0.96991	0.36664	0.70275	0.10756	0.22782	0.99512	0.99959	0.81979	0.94062
Armcx3	4	0.136457	-0.0661858	-0.12629	0.1177	0.40706	0.91276	0.99682	0.68396	0.95893	-0.018757	-0.059687	0.69	0.97367	0.95241	0.99419	0.0058462	0.020335	0.86162	0.98838	0.98378	0.99998	0.072032	0.23346	0.9422	0.99581	0.8154	0.99996	-0.12611	-0.43541	0.62696	0.96991	0.66327	0.8768	0.00018016	0.00057794	0.81948	0.98341	0.99954	0.99975
Armcx5	4	0.8858	-0.45832	-0.46442	0.5685	1.6009	0.11647	0.75344	0.1094	0.88163	-0.3173	-0.67293	0.23308	0.88805	0.50099	0.95614	-0.21546	-0.60644	0.48223	0.9535	0.54422	0.99998	0.24286	0.52177	0.5533	0.95013	0.60183	0.99996	-0.13901	-0.38952	0.60719	0.96823	0.69689	0.88889	0.32541	0.69679	0.61924	0.96338	0.48594	0.78979
Armh3	4	-0.2801	-0.488948	0.24918	-0.10353	-0.24627	0.5773	0.95017	0.80547	0.97691	0.17657	0.44356	0.88328	0.98997	0.65736	0.96604	-0.57239	-1.3788	0.066443	0.74093	0.16794	0.99998	-0.083442	-0.21482	0.70057	0.97395	0.8299	0.99996	-0.20915	-0.49811	0.50613	0.95035	0.61841	0.85372	-0.45833	-1.1473	0.26994	0.8772	0.25124	0.63434
Armt1	4	-0.17407	0.12339	-0.780038	0.27167	1.3258	0.55849	0.94609	0.18492	0.89431	0.44574	1.3802	0.3524	0.92115	0.16753	0.95279	0.30879	1.5109	0.14865	0.82903	0.1308	0.99998	0.1854	0.58519	0.67983	0.9727	0.55842	0.99996	-0.82767	-4.0081	0.077525	0.7037	6.122e-05	0.0091928	-0.047632	-0.14735	0.74546	0.97561	0.88286	0.96101
Arnt	4	-0.52505	0.70896	-0.63231	0.16507	0.4028	0.79833	0.97924	0.68709	0.95978	0.69012	1.4804	0.094047	0.74899	0.13876	0.95279	0.59856	1.5103	0.0081846	0.41371	0.13096	0.99998	-0.1104	-0.23942	0.64465	0.96278	0.81078	0.99996	-0.34493	-0.83313	0.34462	0.8965	0.40477	0.72895	0.28738	0.61737	0.68375	0.97007	0.53699	0.8172
Arnt2	4	0.32449	-0.51087	-0.304359	0.45773	1.2708	0.22963	0.84045	0.20378	0.89431	0.13324	0.35814	0.982	0.99881	0.72024	0.9792	-0.33261	-0.92663	0.26237	0.88016	0.35412	0.99998	0.17826	0.48405	0.69473	0.9738	0.62835	0.99996	-0.37681	-1.0314	0.31158	0.89053	0.30236	0.65459	-0.072451	-0.19553	0.70515	0.97169	0.84498	0.94901
Arntl	4	-0.30276	0.26666	-0.23981	0.15367	0.57864	0.82502	0.98343	0.56283	0.94401	0.45643	1.4803	0.33547	0.92085	0.1388	0.95279	-0.26528	-1.0003	0.37695	0.91929	0.31716	0.99998	-0.53194	-1.7305	0.13009	0.78665	0.083542	0.99996	0.4459	1.6815	0.368	0.90643	0.092669	0.45797	0.68571	2.2341	0.15973	0.81802	0.025474	0.3239
Arpc1a	4	-0.096299	0.122694	-0.11085	0.054601	0.15068	0.93483	0.99703	0.88023	0.98237	0.1509	0.39188	0.94179	0.99251	0.69515	0.97515	0.1127	0.31282	0.54349	0.96455	0.75442	0.99998	-0.0099937	-0.026122	0.86366	0.99357	0.97916	0.99996	0.65532	1.817	0.13614	0.78718	0.069221	0.42725	0.76617	2.0023	0.10477	0.74684	0.045256	0.38741
Arpc1b	4	0.038905	0.08191	0.01072	0.057839	0.1658	0.94189	0.99703	0.86831	0.98187	0.018934	0.046929	0.76941	0.98142	0.96257	0.99508	-0.16733	-0.49309	0.60271	0.97053	0.62195	0.99998	-0.24924	-0.63216	0.40486	0.92497	0.52729	0.99996	0.17203	0.49901	0.84048	0.99256	0.61777	0.85345	0.16131	0.40528	0.90097	0.99206	0.68527	0.88637
Arpc2	4	-0.39786	-0.83265	0.0169	0.17332	0.37142	0.77932	0.97764	0.71033	0.9634	0.57118	0.71571	0.18987	0.8519	0.47417	0.95614	-0.31338	-0.68734	0.29038	0.89409	0.49187	0.99998	0.51927	0.66233	0.13827	0.79707	0.50776	0.99996	-1.4351	-2.9314	0.010167	0.3861	0.0033747	0.12455	-1.452	-1.7948	0.015098	0.48882	0.072679	0.43217
Arpc3	4	-0.27139	-0.00346	0.80091	-0.43919	-0.35733	0.14082	0.77469	0.72085	0.96512	-0.1678	-0.40625	0.42174	0.93899	0.68456	0.97339	0.29134	0.24532	0.16949	0.8362	0.80621	0.99998	0.2948	0.74712	0.44934	0.93406	0.45499	0.99996	0.42744	0.35413	0.3949	0.91603	0.72325	0.89794	-0.37347	-0.91126	0.33842	0.90757	0.36216	0.7177
Arpc4	4	-1.2494	0.00589	-0.61307	-0.7202	-1.5792	0.034162	0.57472	0.11429	0.88163	0.5292	0.74306	0.23791	0.89096	0.45744	0.95614	-0.57419	-1.2659	0.06563	0.73729	0.20556	0.99998	-0.58008	-0.81836	0.10508	0.75793	0.41315	0.99996	-0.39648	-0.8699	0.29322	0.88521	0.38435	0.71543	0.21659	0.30552	0.80418	0.98247	0.75997	0.9172
Arpc5	4	0.14265	-0.23258	0.06998	-0.15401	-0.49886	0.48152	0.92664	0.61788	0.95015	-0.29666	-0.86309	0.25413	0.89851	0.38809	0.95614	-0.18757	-0.61382	0.54918	0.96474	0.53934	0.99998	0.04501	0.13267	0.99278	0.99842	0.89445	0.99996	0.37297	1.2178	0.48279	0.94685	0.2233	0.59248	0.30299	0.89075	0.65635	0.96839	0.37306	0.7261
Arpc5l	4	0.163371	0.37214	-0.30504	0.26247	0.605	0.57958	0.95072	0.54518	0.94136	0.099099	0.20263	0.94184	0.99251	0.83943	0.98896	-0.1987	-0.46805	0.52158	0.95843	0.63975	0.99998	-0.57084	-1.193	0.10981	0.7665	0.23287	0.99996	0.16686	0.38637	0.8511	0.99286	0.69922	0.88981	0.4719	0.98896	0.39098	0.92195	0.32268	0.69171
Arpin	4	0.09754	-0.722143	-0.28999	0.57811	1.5505	0.10843	0.74481	0.12102	0.88163	0.48057	1.1139	0.30004	0.91352	0.26532	0.95279	0.020137	0.053958	0.81582	0.98418	0.95697	0.99998	0.74228	1.7261	0.027757	0.55544	0.084334	0.99996	0.11696	0.31302	0.95094	0.99814	0.75427	0.91171	0.40695	0.94552	0.48533	0.94368	0.34439	0.70735
Arpp19	4	-0.84374	1.46539	-1.62664	-0.98026	-2.5913	0.0084388	0.38249	0.0095605	0.63947	-0.13652	-0.27413	0.47354	0.95291	0.78399	0.98516	-0.27071	-0.72361	0.36582	0.91506	0.4693	0.99998	-1.7361	-3.4712	0.00066087	0.10078	0.00051809	0.14652	-1.1814	-3.1097	0.024147	0.51527	0.0018729	0.084112	0.44524	0.92081	0.42525	0.92574	0.35715	0.71446
Arrb1	4	0.03329	-0.27867	0.15546	0.65156	1.7368	0.06502	0.67298	0.082423	0.88163	0.61827	1.7154	0.14656	0.81415	0.086272	0.95279	0.28208	0.75342	0.18082	0.83746	0.4512	0.99998	0.56075	1.571	0.10559	0.75793	0.11618	0.99996	-0.42715	-1.1295	0.26643	0.87358	0.25867	0.62034	-0.58261	-1.6038	0.19425	0.84131	0.10877	0.47947
Arrb2	4	-0.318429	-0.88948	-0.271061	0.078341	0.27393	0.98963	0.9979	0.78414	0.9748	0.39677	1.2957	0.43419	0.94407	0.19507	0.95279	-0.34984	-1.2291	0.23857	0.87223	0.21902	0.99998	0.53964	1.7679	0.12191	0.77692	0.077081	0.99996	-0.35889	-1.2504	0.32896	0.89099	0.21116	0.58219	-0.087829	-0.2872	0.6809	0.96975	0.77396	0.92348
Arrdc1	4	-0.15953	-0.67575	0.746971	0.62342	1.6931	0.079915	0.7041	0.090445	0.88163	0.78295	1.6957	0.051192	0.67758	0.089937	0.95279	-0.21068	-0.57277	0.49321	0.95428	0.5668	0.99998	0.46507	1.0198	0.19287	0.83116	0.30783	0.99996	-0.015849	-0.04282	0.80957	0.99003	0.96585	0.98968	-0.76282	-1.6418	0.11362	0.76257	0.10062	0.46862
Arrdc2	4	-0.314194	0.726318	0.2095	-0.23759	-0.62337	0.3496	0.89253	0.53304	0.93854	0.076604	0.18948	0.89355	0.99076	0.84972	0.98918	0.027168	0.073675	0.79366	0.982	0.94127	0.99998	-0.69915	-1.7594	0.060698	0.67343	0.078503	0.99996	0.10472	0.27861	0.97575	0.99923	0.78054	0.9235	-0.10478	-0.26118	0.65686	0.96839	0.79395	0.9301
Arrdc3	4	-0.009644	0.0225	-0.08941	0.011227	0.026945	0.82878	0.98372	0.9785	0.99688	0.020871	0.057139	0.77332	0.98142	0.95443	0.99452	0.23987	0.58937	0.24869	0.87458	0.55562	0.99998	0.21737	0.61095	0.60709	0.95858	0.54123	0.99996	-0.19228	-0.46116	0.52895	0.95415	0.64468	0.86753	-0.10287	-0.28398	0.65919	0.96846	0.77643	0.92488
Arsa	4	-0.146016	0.0523	-0.24215	0.052344	0.18436	0.92939	0.99695	0.85373	0.98175	0.19836	0.50342	0.83194	0.98727	0.61467	0.96286	-0.25191	-0.89496	0.40308	0.92428	0.37081	0.99998	-0.30421	-0.78514	0.33059	0.90522	0.43237	0.99996	0.40763	1.4453	0.42448	0.92396	0.14838	0.52111	0.64978	1.6774	0.1883	0.83751	0.093468	0.4579
Arsb	4	-0.85098	0.195525	-0.21012	-0.59158	-1.4468	0.068934	0.68141	0.14797	0.88381	0.2594	0.51101	0.69981	0.97475	0.60935	0.96214	0.040445	0.10132	0.75548	0.98162	0.9193	0.99998	-0.15508	-0.30824	0.56245	0.95144	0.7579	0.99996	0.68688	1.7167	0.11443	0.75293	0.086031	0.45187	0.897	1.7844	0.04621	0.62626	0.074361	0.43328
Arsg	4	0.135	-0.41607	-0.5047	0.43009	1.7268	0.26659	0.85898	0.084203	0.88163	0.29509	0.87499	0.62442	0.96624	0.38158	0.95614	0.16688	0.67421	0.39784	0.92428	0.50018	0.99998	0.58295	1.77	0.091251	0.73537	0.076732	0.99996	-0.21163	-0.84425	0.50262	0.95035	0.39853	0.72589	0.29307	0.87737	0.67287	0.96975	0.38029	0.73125
Arsk	4	0.357802	-0.29405	0.4617	0.39033	1.6058	0.32942	0.8882	0.10833	0.88163	0.032528	0.097176	0.79976	0.98412	0.92259	0.99236	-0.16819	-0.69898	0.60027	0.96994	0.48456	0.99998	0.12586	0.38856	0.81729	0.98846	0.6976	0.99996	-0.23745	-0.96597	0.46642	0.94209	0.33406	0.67773	-0.69915	-2.0736	0.13833	0.79678	0.038116	0.368
Art2b	4	-1.18979	-0.14304	-0.17491	-0.78162	-3.0942	0.024808	0.53382	0.0019732	0.30805	0.40817	1.172	0.41254	0.93813	0.24121	0.95279	-0.40105	-1.6512	0.18154	0.83746	0.098705	0.99998	-0.25801	-0.74974	0.39291	0.92068	0.45341	0.99996	0.17781	0.72651	0.82889	0.99047	0.46753	0.77078	0.35272	1.0202	0.57389	0.95783	0.30762	0.6812
Art3	4	0.49532	0.21251	0.431107	0.64647	1.8168	0.067663	0.67801	0.069243	0.88163	0.15115	0.44045	0.94108	0.99251	0.65961	0.96634	-0.12896	-0.36341	0.71323	0.97931	0.7163	0.99998	-0.34147	-1.0036	0.28468	0.88426	0.31555	0.99996	-0.049803	-0.13892	0.74882	0.98756	0.88952	0.96475	-0.48091	-1.4017	0.25469	0.87201	0.16101	0.54549
Arv1	4	0.45971	-0.0924004	0.50816	0.04748	0.10155	0.91709	0.99682	0.91912	0.98942	-0.41223	-0.97995	0.14956	0.81415	0.32711	0.95279	-0.0051834	-0.011382	0.89782	0.99231	0.99092	0.99998	0.087217	0.21655	0.90707	0.99511	0.82856	0.99996	0.67201	1.4697	0.12404	0.76996	0.14164	0.51388	0.16385	0.40011	0.8968	0.99193	0.68907	0.88802
Arvcf	4	0.10441	-0.053789	0.19685	0.36883	1.106	0.36256	0.89484	0.26874	0.89431	0.26442	0.67605	0.68858	0.9735	0.49901	0.95614	-0.086555	-0.26158	0.84144	0.98712	0.79365	0.99998	-0.032766	-0.084858	0.81069	0.9867	0.93237	0.99996	0.45563	1.372	0.35352	0.90171	0.17007	0.54478	0.25878	0.66635	0.73153	0.97483	0.50519	0.80178
Asah1	4	-0.2679	-0.39973	0.22014	0.45958	1.6446	0.22688	0.83749	0.10005	0.88163	0.72748	1.74	0.073153	0.71379	0.081861	0.95279	0.12072	0.43172	0.52092	0.95842	0.66595	0.99998	0.52045	1.2551	0.13736	0.79494	0.20946	0.99996	0.10669	0.38097	0.97199	0.99906	0.70322	0.89104	-0.11345	-0.27053	0.64364	0.96839	0.78675	0.92895
Asah2	4	0.427875	-0.100816	0.0192	0.38577	0.91985	0.33557	0.88935	0.35765	0.91246	-0.042105	-0.11143	0.64465	0.96823	0.91128	0.99218	-0.15691	-0.37459	0.632	0.97283	0.70796	0.99998	-0.056094	-0.14916	0.75832	0.98009	0.88142	0.99996	0.29591	0.70535	0.6109	0.96897	0.48059	0.77789	0.27671	0.73531	0.70134	0.97169	0.46215	0.77829
Asap1	4	0.07555	0.196116	-0.61683	0.33123	0.82501	0.42901	0.91399	0.40937	0.92525	0.25568	0.68399	0.70764	0.97499	0.49398	0.95614	0.16133	0.40556	0.41081	0.92778	0.68506	0.99998	-0.034786	-0.093595	0.80611	0.98669	0.92543	0.99996	-0.10792	-0.26763	0.6535	0.97332	0.78898	0.92761	0.50891	1.3682	0.34365	0.90896	0.17125	0.55669
Asap2	4	0.08235	0.187138	-0.32166	-0.014537	-0.05045	0.76631	0.97535	0.95976	0.99432	-0.096887	-0.33747	0.5408	0.96373	0.73576	0.98177	0.040188	0.13955	0.75619	0.98162	0.88901	0.99998	-0.14695	-0.51502	0.57699	0.95274	0.60654	0.99996	-0.10065	-0.34896	0.66402	0.97332	0.72712	0.89903	0.22101	0.77357	0.79681	0.98177	0.43918	0.7648
Asap3	4	-0.209278	-0.131163	0.121497	-0.068538	-0.26521	0.64684	0.95912	0.79085	0.9748	0.14074	0.62552	0.96589	0.99727	0.53163	0.95614	-0.2235	-0.87133	0.4652	0.94918	0.38357	0.99998	-0.092337	-0.41406	0.68065	0.9727	0.67883	0.99996	0.043178	0.16758	0.91348	0.99678	0.86691	0.95642	-0.078319	-0.34912	0.69605	0.97169	0.727	0.90435
Asb1	4	-0.338777	0.04046	-0.30301	-0.26998	-0.72524	0.30329	0.87605	0.4683	0.93596	0.068797	0.14706	0.87596	0.98925	0.88308	0.99049	0.13566	0.36931	0.47995	0.9535	0.7119	0.99998	0.0952	0.20547	0.88867	0.99482	0.8372	0.99996	0.31487	0.85298	0.57831	0.96309	0.39367	0.72319	0.61788	1.3317	0.21916	0.8537	0.18294	0.56896
Asb10	4	0.18905	0.76326	0.65928	0.33657	1.2091	0.41813	0.91151	0.22661	0.89431	0.14752	0.55537	0.94942	0.99384	0.57864	0.9581	0.20118	0.72373	0.32444	0.90839	0.46923	0.99998	-0.56208	-2.1235	0.11418	0.77293	0.033714	0.96118	0.69317	2.4925	0.10945	0.74627	0.012683	0.25563	0.03389	0.12797	0.87774	0.99169	0.89817	0.96546
Asb13	4	0.46797	-0.61725	-0.48728	0.10567	0.28958	0.94215	0.99703	0.77214	0.97371	-0.3623	-0.7454	0.1886	0.85055	0.45603	0.95614	0.10335	0.28466	0.56871	0.9659	0.7759	0.99998	0.7206	1.5303	0.032739	0.57706	0.12593	0.99996	0.48563	1.3345	0.31254	0.89053	0.18205	0.55605	0.97291	2.0525	0.027909	0.57055	0.040122	0.3728
Asb3	4	0.197989	0.15021	0.0663	0.22881	0.93975	0.65111	0.95912	0.34735	0.91238	0.030821	0.12678	0.79599	0.9836	0.89911	0.99163	0.31681	1.3111	0.13924	0.81732	0.18981	0.99998	0.1666	0.69285	0.72086	0.97631	0.4884	0.99996	-0.30476	-1.246	0.38575	0.91106	0.21278	0.58393	-0.37106	-1.5285	0.34101	0.90809	0.12639	0.504
Asb4	4	0.45314	0.52257	0.10719	0.17891	0.55373	0.76656	0.97542	0.57976	0.9452	-0.27423	-0.75877	0.27838	0.90218	0.44799	0.95614	-0.21421	-0.66606	0.48538	0.9535	0.50537	0.99998	-0.73678	-2.0772	0.050735	0.64763	0.037785	0.96469	0.31868	0.98867	0.5716	0.96206	0.32283	0.66904	0.21149	0.59638	0.81379	0.98276	0.55092	0.82584
Asb5	4	-0.776304	-0.04092	0.24194	-0.71043	-2.7511	0.035992	0.57615	0.0059399	0.52272	0.065874	0.20474	0.87006	0.98925	0.83778	0.98896	-0.16865	-0.66696	0.59916	0.96994	0.5048	0.99998	-0.12773	-0.40227	0.61364	0.95965	0.68749	0.99996	-0.29717	-1.1604	0.39424	0.91603	0.24587	0.6117	-0.53911	-1.674	0.21687	0.8537	0.094134	0.45872
Asb6	4	-0.05142	-0.03133	0.1289	0.22875	0.70698	0.65131	0.95912	0.47958	0.93596	0.28017	0.88164	0.65447	0.96959	0.37797	0.95614	0.14594	0.45192	0.4527	0.94572	0.65133	0.99998	0.17727	0.56012	0.69732	0.97395	0.5754	0.99996	-1.1102	-3.4019	0.030298	0.53937	0.00066915	0.043016	-1.2391	-3.8989	0.027045	0.56748	9.6637e-05	0.01302
Asb7	4	-0.370868	-0.07483	0.37219	-0.36992	-1.3627	0.19536	0.82037	0.17297	0.89157	0.00094845	0.003168	0.73006	0.98027	0.99747	0.99992	-0.29151	-1.1147	0.32861	0.91081	0.26498	0.99998	-0.21668	-0.74358	0.45656	0.93524	0.45713	0.99996	-0.3432	-1.2771	0.34594	0.89788	0.20158	0.5745	-0.71539	-2.3636	0.13243	0.79495	0.018099	0.29206
Asb8	4	-0.728791	-0.16661	0.10735	0.096779	0.33503	0.96492	0.99703	0.7376	0.96839	0.82557	2.0107	0.03828	0.6354	0.044353	0.95279	0.2734	0.95607	0.19313	0.84181	0.33904	0.99998	0.44001	1.082	0.22124	0.85605	0.27924	0.99996	0.28278	0.98256	0.6352	0.97149	0.32582	0.67162	0.17543	0.42618	0.87723	0.99169	0.66997	0.87912
Ascc1	4	-0.254879	0.55914	-0.17488	-0.070219	-0.19537	0.6442	0.95907	0.84511	0.98147	0.18466	0.55049	0.86437	0.98887	0.58198	0.9581	0.10187	0.28481	0.57292	0.96717	0.77579	0.99998	-0.45727	-1.3692	0.18108	0.82727	0.17094	0.99996	0.22076	0.61547	0.7506	0.98756	0.53824	0.81002	0.39564	1.1846	0.50358	0.94671	0.23616	0.61898
Ascc2	4	-0.27472	-0.47908	0.44093	-0.58039	-1.3554	0.073611	0.69341	0.17528	0.89157	-0.30567	-0.60362	0.24483	0.89487	0.54609	0.95697	0.12983	0.31358	0.4956	0.95449	0.75384	0.99998	0.60891	1.2881	0.077881	0.71985	0.19772	0.99996	-0.08551	-0.20225	0.68822	0.9767	0.83972	0.9474	-0.52644	-1.0489	0.22495	0.85516	0.29421	0.67353
Ascc3	4	0.540351	1.03039	1.63929	0.62217	0.77382	0.080982	0.7041	0.43904	0.92997	0.081819	0.14084	0.90443	0.9917	0.888	0.99051	0.69322	0.87665	0.0024401	0.24242	0.38068	0.99998	-0.33717	-0.58996	0.28992	0.88917	0.55522	0.99996	1.348	1.7013	0.00050836	0.10638	0.088889	0.45415	-0.29129	-0.50363	0.4197	0.92459	0.61452	0.85242
Asf1a	4	0.54345	0.11645	0.399065	0.30504	0.92768	0.48508	0.92778	0.35357	0.91246	-0.23841	-0.72756	0.32169	0.9181	0.46688	0.95614	-0.07888	-0.24129	0.86472	0.98838	0.80933	0.99998	-0.19533	-0.60229	0.49123	0.93879	0.54698	0.99996	0.38697	1.1798	0.45875	0.93894	0.23807	0.60532	-0.012095	-0.037155	0.80072	0.98207	0.97036	0.98937
Asf1b	4	0.05016	-0.00999	-0.123033	0.1436	0.48549	0.84932	0.98747	0.62733	0.95213	0.09344	0.27591	0.92924	0.99251	0.78262	0.98476	0.21366	0.7248	0.29856	0.89856	0.46858	0.99998	0.22365	0.6708	0.59316	0.95687	0.50235	0.99996	-0.13512	-0.45584	0.61334	0.9695	0.64851	0.86888	-0.012087	-0.035911	0.80072	0.98207	0.97135	0.98957
Asgr1	4	0.17112	-0.114631	0.338861	0.50385	1.4905	0.17584	0.80255	0.1361	0.88273	0.33273	0.99551	0.55315	0.96468	0.31949	0.95279	-0.064254	-0.19046	0.91195	0.99294	0.84895	0.99998	0.050377	0.15242	0.99344	0.99842	0.87886	0.99996	0.41705	1.2339	0.41137	0.92393	0.21723	0.58733	0.078189	0.23473	0.95257	0.9964	0.81442	0.9382
Asgr2	4	0.35558	-0.0178778	0.02945	0.4855	1.3937	0.1974	0.82037	0.16339	0.88954	0.12992	0.38245	0.98917	0.99923	0.70212	0.97617	-0.015507	-0.044775	0.93188	0.99533	0.96429	0.99998	0.0023708	0.007089	0.8934	0.99511	0.99434	0.99996	0.18016	0.51626	0.82502	0.99003	0.60567	0.8466	0.15071	0.44709	0.91963	0.99298	0.65481	0.87263
Ash1l	4	-0.157989	0.10343	0.68113	-0.23667	-0.6708	0.35082	0.89253	0.50235	0.93634	-0.078681	-0.20648	0.57394	0.96574	0.83641	0.98896	-0.31739	-0.91482	0.28463	0.892	0.36029	0.99998	-0.42082	-1.1247	0.20929	0.84848	0.2607	0.99996	-0.34557	-0.98187	0.3436	0.89594	0.32616	0.67162	-1.0267	-2.6525	0.051243	0.63539	0.0079901	0.19863
Ash2l	4	-1.85892	0.36921	0.35268	-0.95227	-1.2029	0.0096589	0.40169	0.22902	0.89431	0.90665	0.75719	0.020843	0.53109	0.44894	0.95614	0.94224	1.2461	0.00010167	0.045455	0.21274	0.99998	0.57303	0.48782	0.096436	0.73584	0.62568	0.99996	1.0554	1.3814	0.0077271	0.35349	0.16715	0.54117	0.70272	0.59045	0.14605	0.80521	0.55489	0.82803
Asic1	4	0.43772	0.96297	-0.1312	0.30893	0.74494	0.47649	0.92381	0.45631	0.93507	-0.12879	-0.33787	0.4863	0.956	0.73546	0.98176	0.51719	1.2761	0.020131	0.55076	0.20193	0.99998	-0.44578	-1.2042	0.18886	0.8311	0.22849	0.99996	-0.25341	-0.60654	0.44665	0.93483	0.54416	0.81475	-0.12221	-0.32495	0.62956	0.9672	0.74522	0.91373
Asl	4	-0.47993	-0.58368	0.73493	0.24893	0.7802	0.60876	0.95433	0.43527	0.92906	0.72886	1.1452	0.072594	0.71222	0.25213	0.95279	0.3061	0.97499	0.1519	0.83034	0.32957	0.99998	0.88978	1.4192	0.0079813	0.37802	0.15583	0.99996	0.20468	0.64264	0.77922	0.98842	0.52045	0.79921	-0.53025	-0.82468	0.22256	0.85395	0.40955	0.74898
Asns	4	0.03973	0.77486	0.22463	-0.11765	-0.20515	0.54929	0.94482	0.83746	0.98118	-0.15738	-0.30788	0.43943	0.94508	0.75818	0.98238	0.35447	0.6214	0.10391	0.79813	0.53433	0.99998	-0.42039	-0.83994	0.2096	0.84848	0.40094	0.99996	0.74721	1.3079	0.080728	0.70524	0.19091	0.56717	0.52258	1.0449	0.32632	0.90168	0.29607	0.67431
Asnsd1	4	-0.781	-0.73141	-0.62108	-0.16889	-0.37767	0.45676	0.91967	0.70567	0.96271	0.61211	0.74853	0.15093	0.81415	0.45414	0.95614	-0.41948	-0.94256	0.16263	0.8362	0.34591	0.99998	0.31193	0.39123	0.41752	0.92752	0.69563	0.99996	0.36578	0.82243	0.49403	0.94766	0.41083	0.73268	0.98686	1.2315	0.025672	0.55373	0.21813	0.6043
Asph	4	-0.618167	-0.35996	-0.25017	0.030043	0.10981	0.87672	0.99069	0.91256	0.98848	0.64821	1.5828	0.12262	0.78653	0.11346	0.95279	-0.11978	-0.44151	0.73967	0.98074	0.65884	0.99998	0.24018	0.59477	0.55869	0.95128	0.55199	0.99996	-0.50531	-1.8354	0.21021	0.84996	0.066447	0.42044	-0.25514	-0.61673	0.45936	0.93566	0.53741	0.81736
Aspm	4	0.80232	-0.06574	0.02437	0.44203	1.198	0.2492	0.84768	0.23093	0.89431	-0.36029	-1.0018	0.19033	0.8523	0.31643	0.95279	-0.33464	-0.91238	0.25921	0.87894	0.36157	0.99998	-0.2689	-0.78178	0.37715	0.91639	0.43434	0.99996	0.16478	0.44565	0.85563	0.99286	0.65585	0.87266	0.14041	0.40264	0.93645	0.99595	0.68721	0.88726
Aspscr1	4	0.72169	0.02234	0.14014	0.46709	1.1551	0.21865	0.83214	0.24804	0.89431	-0.2546	-0.72981	0.30161	0.91431	0.46551	0.95614	-0.14774	-0.36464	0.65843	0.97701	0.71538	0.99998	-0.17008	-0.49197	0.53576	0.94898	0.62274	0.99996	0.72877	1.8014	0.088862	0.71126	0.071634	0.43132	0.58863	1.7023	0.24879	0.8665	0.0887	0.4501
Asrgl1	4	-0.18961	0.00246	-1.08797	0.28941	0.83825	0.51934	0.9369	0.40189	0.9239	0.47902	0.89209	0.30232	0.91431	0.37234	0.9542	0.12384	0.35925	0.51238	0.95794	0.71941	0.99998	0.12138	0.22732	0.82782	0.98951	0.82018	0.99996	-0.16096	-0.4646	0.57384	0.96231	0.64222	0.86652	0.92701	1.7359	0.038178	0.6024	0.082579	0.44259
Ass1	4	0.151059	-0.196208	-0.0920762	0.18839	0.56928	0.74526	0.97378	0.56917	0.94467	0.037331	0.12732	0.81074	0.98524	0.89869	0.99163	-0.050298	-0.15273	0.95669	0.99746	0.87862	0.99998	0.14591	0.50324	0.76885	0.98072	0.6148	0.99996	-0.00088322	-0.0026678	0.83468	0.99155	0.99787	0.99905	0.091193	0.31282	0.97606	0.99866	0.75442	0.91631
Aste1	4	0.439198	0.52741	0.55083	0.035088	0.104	0.88801	0.99205	0.91717	0.98892	-0.40411	-1.3246	0.15449	0.81454	0.18529	0.95279	-0.23471	-0.70076	0.43999	0.94137	0.48345	0.99998	-0.76212	-2.5207	0.045092	0.63539	0.011712	0.70672	-0.14724	-0.43623	0.59382	0.96466	0.66267	0.87666	-0.69807	-2.2957	0.13878	0.79731	0.021692	0.31087
Asxl1	4	0.601921	0.70648	0.74311	-0.062889	-0.18049	0.65899	0.95912	0.85677	0.98175	-0.66481	-2.1481	0.04133	0.64422	0.031703	0.95279	0.16925	0.48745	0.39169	0.92428	0.62594	0.99998	-0.53723	-1.755	0.12689	0.78202	0.079252	0.99996	0.19679	0.565	0.79406	0.98952	0.57207	0.82803	-0.54632	-1.7773	0.21244	0.84922	0.075514	0.43543
Asxl2	4	0.0753	0.329504	-0.41993	0.43429	1.3422	0.26033	0.85585	0.17953	0.8931	0.35899	0.98976	0.49972	0.95989	0.32229	0.95279	0.27095	0.84428	0.19623	0.84188	0.39851	0.99998	-0.058554	-0.16524	0.75365	0.98009	0.86876	0.99996	-0.20914	-0.64174	0.50613	0.95035	0.52104	0.79968	0.21079	0.58619	0.81516	0.98276	0.55775	0.82922
Atad1	4	-0.69773	0.87849	-0.02649	-0.58066	-1.807	0.073509	0.69341	0.070768	0.88163	0.11707	0.3039	0.98251	0.99907	0.7612	0.98242	0.45685	1.4275	0.038686	0.65381	0.15345	0.99998	-0.42164	-1.1066	0.20894	0.8483	0.26845	0.99996	-0.31756	-0.9874	0.37171	0.90877	0.32344	0.66931	-0.29107	-0.7572	0.42001	0.92459	0.44893	0.76995
Atad2	4	0.14625	1.02179	0.14276	0.75837	1.6423	0.029078	0.56024	0.10052	0.88163	0.61212	1.3498	0.15083	0.81415	0.17707	0.95279	0.27163	0.58851	0.19486	0.84181	0.55619	0.99998	-0.75016	-1.6563	0.047481	0.64242	0.097655	0.99996	-0.36365	-0.78239	0.32474	0.89053	0.43398	0.74725	-0.50641	-1.1171	0.23725	0.86022	0.26396	0.64838
Atad2b	4	-1.26176	-0.43611	-0.39396	-0.44528	-0.98052	0.13695	0.77469	0.32683	0.91164	0.81648	1.2978	0.039957	0.63731	0.19435	0.95279	-0.32714	-0.73459	0.26964	0.88474	0.46259	0.99998	0.10897	0.1749	0.85634	0.99299	0.86116	0.99996	0.78174	1.7641	0.065274	0.6791	0.077713	0.44004	1.1757	1.8902	0.0047786	0.30519	0.058732	0.40603
Atad3a	4	0.03925	0.22751	0.70656	-0.11689	-0.16432	0.55117	0.94523	0.86948	0.98187	-0.15614	-0.251	0.44126	0.94508	0.80182	0.98631	-0.29514	-0.42373	0.32144	0.90839	0.67176	0.99998	-0.52265	-0.85896	0.13578	0.79423	0.39036	0.99996	1.2218	1.7864	0.0018809	0.18593	0.074031	0.43386	0.51524	0.84899	0.33527	0.90457	0.39589	0.74083
Atad5	4	-0.43956	-0.31421	-0.61747	-0.6401	-1.5874	0.052819	0.63821	0.11242	0.88163	-0.20054	-0.65028	0.37156	0.9286	0.51551	0.95614	-0.41616	-1.0623	0.16608	0.8362	0.28811	0.99998	-0.10195	-0.33556	0.66041	0.9658	0.7372	0.99996	-0.94438	-2.3321	0.05104	0.63425	0.019698	0.30044	-0.32691	-1.0665	0.3827	0.91775	0.28622	0.66724
Atat1	4	0.06466	-0.04867	0.1636	-0.21734	-0.63126	0.37919	0.90109	0.52787	0.93822	-0.282	-0.91043	0.26872	0.89851	0.36259	0.9542	0.12802	0.37857	0.50048	0.95536	0.70501	0.99998	0.17669	0.57893	0.69859	0.97395	0.56263	0.99996	0.41354	1.2157	0.4163	0.92393	0.22409	0.59258	0.24994	0.81526	0.74734	0.97561	0.41493	0.75266
Ate1	4	0.25146	-0.78204	-0.335469	0.42914	1.7242	0.26836	0.86008	0.084664	0.88163	0.17768	0.57133	0.88018	0.98937	0.56778	0.95769	-0.20193	-0.81177	0.51487	0.95794	0.41692	0.99998	0.58011	1.895	0.092827	0.73537	0.058095	0.99996	-0.088969	-0.35641	0.68304	0.97609	0.72154	0.8972	0.2465	0.79855	0.75304	0.9757	0.42455	0.75777
Atf1	4	-0.53329	0.437913	-0.18153	-0.36819	-1.076	0.19643	0.82037	0.28191	0.89545	0.1651	0.43778	0.90855	0.99227	0.66154	0.9665	-0.019427	-0.05724	0.94439	0.99732	0.95435	0.99998	-0.45734	-1.2225	0.18103	0.82727	0.2215	0.99996	0.59914	1.7643	0.18631	0.83021	0.077684	0.44004	0.78067	2.0916	0.096487	0.73354	0.036475	0.36274
Atf2	4	-0.02083	0.53434	-0.40686	0.65158	1.2439	0.06502	0.67298	0.21353	0.89431	0.67241	1.3707	0.10543	0.76328	0.17047	0.95279	-0.08333	-0.16048	0.85105	0.98722	0.8725	0.99998	-0.61767	-1.262	0.089167	0.73537	0.20695	0.99996	-0.13395	-0.2515	0.61527	0.96991	0.80143	0.93251	0.27291	0.55693	0.70805	0.97195	0.57757	0.83633
Atf3	4	-0.87099	0.027274	-0.37707	-0.63339	-1.9532	0.054852	0.64379	0.050798	0.88163	0.2376	0.63634	0.74709	0.98142	0.52456	0.95614	0.11295	0.35086	0.54278	0.96455	0.7257	0.99998	0.085676	0.23166	0.91038	0.99511	0.8168	0.99996	0.21626	0.66977	0.75838	0.98802	0.503	0.7891	0.59333	1.6014	0.24467	0.8665	0.10928	0.48017
Atf4	4	0.19217	0.07665	0.88591	0.31256	0.82746	0.46835	0.92158	0.40798	0.92494	0.12039	0.33447	0.98963	0.99923	0.73802	0.98236	0.22307	0.59922	0.27899	0.89079	0.54903	0.99998	0.14642	0.41826	0.76768	0.98071	0.67576	0.99996	0.72599	1.9416	0.09059	0.71653	0.052184	0.39527	-0.15992	-0.44658	0.57648	0.95808	0.65518	0.8727
Atf5	4	0.797175	-0.562114	0.634036	0.052035	0.14252	0.92852	0.99695	0.88667	0.98449	-0.74514	-2.6399	0.026892	0.58242	0.0082932	0.95279	-0.50995	-1.404	0.095826	0.79183	0.16031	0.99998	0.052164	0.18849	0.98983	0.99821	0.8505	0.99996	0.56715	1.5656	0.22053	0.85672	0.11743	0.48722	-0.066886	-0.24019	0.714	0.97238	0.81018	0.93654
Atf6	4	-0.14612	-1.0186	-0.215	0.553	1.4212	0.12912	0.76536	0.15525	0.88676	0.69912	1.2775	0.088963	0.74278	0.20144	0.95279	-0.37079	-0.95118	0.21422	0.8579	0.34151	0.99998	0.64781	1.1992	0.059275	0.66837	0.23046	0.99996	0.2677	0.68667	0.66326	0.97332	0.49229	0.78354	0.4827	0.8855	0.37553	0.91393	0.37589	0.72862
Atf6b	4	0.22964	-0.438053	0.98425	0.30286	0.89971	0.49021	0.92841	0.36827	0.91247	0.07322	0.26695	0.88638	0.99026	0.7895	0.98631	-0.38594	-1.1452	0.19592	0.84181	0.25211	0.99998	0.052113	0.19179	0.98993	0.99821	0.84791	0.99996	0.34266	1.0177	0.53104	0.95505	0.30881	0.65778	-0.64159	-2.3411	0.16354	0.81966	0.019229	0.29575
Atf7ip	4	-0.32184	-0.782652	0.57499	0.47407	0.99258	0.20965	0.82546	0.32092	0.9101	0.79591	1.8597	0.046159	0.65873	0.062926	0.95279	-0.074842	-0.15791	0.87682	0.98922	0.87453	0.99998	0.70781	1.672	0.037466	0.60791	0.094527	0.99996	0.72668	1.5319	0.090234	0.71567	0.12555	0.49949	0.15169	0.35381	0.9179	0.99298	0.72348	0.90283
Atg10	4	-0.22549	-0.49216	-0.4579	-0.32611	-1.0264	0.23781	0.84215	0.30472	0.90291	-0.10062	-0.39588	0.53414	0.96345	0.69219	0.97444	-0.3058	-0.97788	0.30339	0.9008	0.32813	0.99998	0.18636	0.74815	0.6779	0.97182	0.45437	0.99996	-0.78852	-2.4647	0.086828	0.70982	0.013714	0.26603	-0.33062	-1.3075	0.37909	0.91627	0.19104	0.57705
Atg101	4	0.19426	0.59796	0.41762	-0.24247	-0.65285	0.34203	0.89101	0.51385	0.93634	-0.43673	-1.5145	0.13284	0.80462	0.12991	0.95279	-0.20161	-0.56037	0.51528	0.95794	0.57523	0.99998	-0.79957	-2.8281	0.038483	0.61147	0.0046832	0.49002	-0.19341	-0.52471	0.52732	0.95375	0.59978	0.84418	-0.61103	-2.135	0.17793	0.82567	0.032764	0.34986
Atg12	4	-0.671729	-0.58223	-0.58572	-0.69781	-2.1006	0.038331	0.58224	0.03568	0.88163	-0.026081	-0.074392	0.67582	0.97065	0.9407	0.99358	-1.0085	-3.0236	0.0047786	0.32526	0.0024983	0.99998	-0.42627	-1.225	0.20472	0.84494	0.22057	0.99996	-0.75503	-2.2656	0.096386	0.72256	0.023478	0.31844	-0.16931	-0.48536	0.56479	0.95604	0.62742	0.85786
Atg13	4	0.58742	-0.459256	0.18529	0.74696	1.4808	0.031874	0.57233	0.13867	0.88273	0.15954	0.31953	0.92222	0.99251	0.74933	0.98236	0.086254	0.17197	0.61797	0.97273	0.86346	0.99998	0.54551	1.1081	0.11794	0.77607	0.2678	0.99996	0.29331	0.57832	0.61583	0.96991	0.56305	0.82393	0.10802	0.21762	0.99436	0.99944	0.82773	0.94384
Atg14	4	0.93527	0.81656	0.02773	-0.40383	-0.75203	0.16578	0.79368	0.45203	0.93404	-1.3391	-2.5687	0.00050836	0.086207	0.010207	0.95279	-0.10277	-0.19849	0.79096	0.982	0.84266	0.99998	-0.91933	-1.8061	0.022114	0.52221	0.070903	0.99996	0.31853	0.60731	0.57176	0.96206	0.54364	0.81441	0.2908	0.57399	0.67704	0.96975	0.56597	0.83239
Atg16l1	4	0.27377	-0.57535	-1.41717	0.11193	0.18817	0.92639	0.99695	0.85074	0.98175	-0.16184	-0.19576	0.43262	0.94345	0.8448	0.98918	-0.11205	-0.1922	0.76209	0.98162	0.84758	0.99998	0.4633	0.60992	0.19419	0.83116	0.54191	0.99996	-0.35237	-0.58786	0.33588	0.89255	0.55663	0.82169	1.0648	1.3879	0.013777	0.48882	0.16518	0.55025
Atg16l2	4	0.511619	0.59007	0.64718	0.41702	1.1036	0.28661	0.86765	0.26978	0.89431	-0.094599	-0.24538	0.54522	0.96468	0.80616	0.98719	-0.53633	-1.4232	0.082914	0.77262	0.15469	0.99998	-1.1264	-2.9515	0.0086422	0.37802	0.0031625	0.40904	-0.85182	-2.1822	0.071222	0.69284	0.029092	0.34202	-1.499	-3.713	0.013268	0.48882	0.00020483	0.021095
Atg2a	4	-0.07814	-0.13907	-0.62004	0.21268	0.54322	0.68842	0.96586	0.58698	0.94564	0.29082	0.74921	0.63256	0.96624	0.45373	0.95614	0.14821	0.38547	0.4469	0.94567	0.69989	0.99998	0.28728	0.76466	0.46347	0.93569	0.44447	0.99996	-0.64907	-1.6317	0.13248	0.77977	0.10273	0.46736	-0.02903	-0.075101	0.77393	0.97763	0.94013	0.97908
Atg2b	4	-0.463253	0.22921	0.24519	0.096927	0.31655	0.96452	0.99703	0.75159	0.97061	0.56018	1.4597	0.20187	0.86609	0.14438	0.95279	-0.09742	-0.31874	0.80687	0.98246	0.74993	0.99998	-0.32663	-0.8565	0.30217	0.8941	0.39172	0.99996	0.01637	0.053397	0.86549	0.99439	0.95742	0.9872	-0.22882	-0.59436	0.49067	0.94488	0.55227	0.82644
Atg3	4	0.20958	-0.18953	0.1657	0.7084	1.3686	0.042347	0.59814	0.17113	0.89157	0.49882	1.3279	0.27513	0.90125	0.18421	0.95279	0.1568	0.30404	0.42301	0.93536	0.7611	0.99998	0.34633	0.9352	0.3587	0.90873	0.34968	0.99996	0.2393	0.46033	0.71481	0.98001	0.64528	0.86762	0.0736	0.19626	0.9452	0.9964	0.8444	0.94894
Atg4b	4	-0.055135	0.023266	-0.98841	0.019339	0.046261	0.84917	0.98747	0.9631	0.99497	0.074474	0.12315	0.88887	0.99026	0.90199	0.99189	0.063428	0.15288	0.687	0.97931	0.87849	0.99998	0.040162	0.068577	0.9816	0.99778	0.94533	0.99996	0.18199	0.43611	0.82141	0.99003	0.66276	0.87666	1.1704	2.0049	0.0049311	0.30892	0.044972	0.38682
Atg4c	4	0.098509	-0.01406	0.41776	0.018672	0.048111	0.84744	0.98747	0.96163	0.99481	-0.079837	-0.2285	0.57226	0.96574	0.81926	0.98841	0.25572	0.67308	0.22165	0.86237	0.5009	0.99998	0.26978	0.79327	0.49814	0.94019	0.42762	0.99996	-0.14988	-0.38607	0.59016	0.96436	0.69945	0.88981	-0.56764	-1.6264	0.20141	0.84426	0.10387	0.47311
Atg4d	4	0.28632	0.500223	0.29807	0.53853	0.6607	0.14173	0.77469	0.5088	0.93634	0.25221	0.46521	0.71567	0.97764	0.64178	0.96572	0.52753	0.65448	0.018047	0.52897	0.5128	0.99998	0.027307	0.050848	0.95135	0.99656	0.95945	0.99996	0.64141	0.78918	0.14809	0.80115	0.43	0.74433	0.34334	0.63743	0.59011	0.96072	0.52384	0.81036
Atg5	4	-0.2438	-0.634872	0.23614	0.22354	0.43977	0.66301	0.96039	0.6601	0.95592	0.46734	1.1471	0.3194	0.9181	0.25132	0.95279	-0.050302	-0.10082	0.95664	0.99746	0.91969	0.99998	0.58457	1.4508	0.090438	0.73537	0.14684	0.99996	0.51299	1.0212	0.27777	0.87775	0.30717	0.65669	0.27685	0.68207	0.70113	0.97169	0.49519	0.79574
Atg7	4	-1.0644	0.89212	0.496836	-0.61439	-1.4477	0.061156	0.66172	0.1477	0.88381	0.45001	0.97118	0.34655	0.92106	0.33146	0.95279	0.12292	0.29374	0.51492	0.95794	0.76896	0.99998	-0.7692	-1.6655	0.04316	0.62289	0.095805	0.99996	0.50039	1.189	0.29312	0.88521	0.23443	0.60189	0.0035536	0.0076758	0.82589	0.98526	0.99388	0.99809
Atg9a	4	-1.18517	1.21545	0.33247	-0.32158	-0.4307	0.24274	0.84413	0.66669	0.95592	0.86359	1.0232	0.028672	0.59252	0.30622	0.95279	0.019647	0.027035	0.8175	0.98445	0.97843	0.99998	-1.1958	-1.4104	0.0064562	0.36182	0.15841	0.99996	1.2411	1.7233	0.0017284	0.1828	0.084826	0.45	0.90863	1.0842	0.043211	0.61639	0.27827	0.66132
Atg9b	4	0.026682	-0.37609	0.01272	-0.010525	-0.036424	0.77622	0.97685	0.97094	0.99643	-0.037207	-0.10895	0.65396	0.96941	0.91324	0.99236	-0.16533	-0.57191	0.60937	0.97167	0.56739	0.99998	0.21076	0.62205	0.62305	0.96132	0.53391	0.99996	0.68858	2.3837	0.11347	0.75193	0.017141	0.28503	0.67586	1.9927	0.1671	0.82322	0.046293	0.38959
Atic	4	0.2524	-0.129655	0.18668	-0.24809	-0.39555	0.33415	0.88926	0.69244	0.96066	-0.50049	-0.73288	0.097402	0.75088	0.46363	0.95614	-0.17906	-0.3043	0.57165	0.9669	0.7609	0.99998	-0.049405	-0.079083	0.77347	0.98155	0.93697	0.99996	0.58437	0.98472	0.20106	0.843	0.32476	0.6707	0.39769	0.6206	0.50038	0.94614	0.53486	0.81635
Atl1	4	0.01828	-0.41564	0.234021	-0.016775	-0.054621	0.76127	0.97512	0.95644	0.99432	-0.035055	-0.11382	0.65884	0.96976	0.90938	0.99209	-0.14576	-0.48047	0.66367	0.97732	0.63089	0.99998	0.26988	0.88332	0.49799	0.94019	0.37706	0.99996	0.17608	0.57664	0.83219	0.99063	0.56418	0.82403	-0.057941	-0.18888	0.72925	0.97483	0.85018	0.95049
Atl2	4	-0.04759	-1.16831	-0.26664	0.62379	1.3611	0.079762	0.7041	0.17347	0.89157	0.67138	1.1729	0.10645	0.76507	0.24084	0.95279	-0.81641	-1.7629	0.016369	0.51603	0.077922	0.99998	0.3519	0.62148	0.34925	0.90873	0.53428	0.99996	-0.45314	-0.97522	0.24579	0.86578	0.32945	0.6745	-0.1865	-0.32565	0.5439	0.95365	0.74469	0.91373
Atl3	4	-0.52884	-0.045614	0.90181	-0.64045	-1.4714	0.052666	0.63754	0.14119	0.88303	-0.11161	-0.26068	0.51563	0.96296	0.79434	0.98631	-0.065998	-0.15464	0.9059	0.99294	0.87711	0.99998	-0.020384	-0.048434	0.83941	0.98975	0.96137	0.99996	0.79175	1.8564	0.061664	0.67165	0.0634	0.41516	-0.11006	-0.25906	0.64862	0.96839	0.79559	0.93089
Atm	4	-0.468689	0.502674	0.74537	-0.024239	-0.07037	0.7449	0.97378	0.9439	0.99301	0.44445	1.3348	0.35387	0.92115	0.18194	0.95279	0.062644	0.18371	0.68959	0.97931	0.85424	0.99998	-0.44003	-1.3295	0.19292	0.83116	0.18367	0.99996	-0.57243	-1.6518	0.17015	0.82091	0.098569	0.46306	-1.3178	-3.921	0.021656	0.53602	8.8165e-05	0.0123
Atmin	4	0.95741	0.024149	0.46409	0.18969	0.52703	0.74216	0.97378	0.59817	0.94716	-0.76772	-1.8112	0.023436	0.55516	0.070115	0.95279	-0.014004	-0.039429	0.92685	0.99438	0.96855	0.99998	-0.038153	-0.093274	0.7993	0.98669	0.92569	0.99996	0.18788	0.52352	0.8115	0.99003	0.60061	0.84475	-0.27621	-0.66432	0.43618	0.93008	0.50649	0.80206
Atn1	4	0.0131	-0.92355	0.1066	0.3984	1.2793	0.31701	0.88072	0.20081	0.89431	0.3853	1.0792	0.45422	0.94686	0.28048	0.95279	-0.22962	-0.73665	0.45178	0.94572	0.46134	0.99998	0.69393	1.9579	0.04194	0.6171	0.050246	0.99125	-1.3531	-4.3152	0.013268	0.41827	1.5947e-05	0.0037794	-1.4597	-4.0395	0.014997	0.48882	5.3564e-05	0.0084085
Atox1	4	-0.0221604	-0.49514	-0.05147	-0.016756	-0.064593	0.76132	0.97512	0.9485	0.99308	0.0054044	0.017846	0.73921	0.98142	0.98576	0.998	-0.14714	-0.57073	0.6597	0.97714	0.56818	0.99998	0.348	1.1608	0.35601	0.90873	0.24574	0.99996	-0.34791	-1.3372	0.34152	0.89557	0.18116	0.55569	-0.29644	-0.98199	0.41493	0.92342	0.3261	0.69322
Atp10a	4	-0.75264	-0.63429	0.224657	-0.10384	-0.29926	0.57653	0.95017	0.76474	0.97371	0.6488	1.4612	0.12221	0.78569	0.14395	0.95279	-0.31417	-0.92346	0.28921	0.89364	0.35577	0.99998	0.32012	0.73564	0.40293	0.92345	0.46195	0.99996	-0.043613	-0.12638	0.75985	0.98815	0.89943	0.96799	-0.26827	-0.59896	0.44497	0.93192	0.5492	0.82505
Atp11a	4	0.07405	-0.11342	0.047262	-0.26581	-0.94229	0.30934	0.87606	0.34604	0.91229	-0.33986	-1.1974	0.21021	0.87235	0.23115	0.95279	-0.51581	-1.8336	0.092624	0.78744	0.066711	0.99998	-0.40239	-1.4353	0.22536	0.85682	0.15121	0.99996	0.10031	0.3564	0.9847	0.99923	0.72154	0.8972	0.053048	0.1887	0.90946	0.99244	0.85033	0.95049
Atp11b	4	0.236786	0.349191	-0.286042	0.32478	0.97118	0.44222	0.91908	0.33146	0.91188	0.087994	0.31897	0.91866	0.99251	0.74975	0.98236	0.26621	0.80073	0.2034	0.85001	0.42329	0.99998	-0.082981	-0.30454	0.70139	0.97395	0.76072	0.99996	-0.31589	-0.9396	0.37344	0.90918	0.34742	0.68876	-0.029848	-0.10876	0.77312	0.97757	0.9134	0.9708
Atp11c	4	-0.06445	-0.04538	-0.385869	0.23848	1.339	0.6293	0.95798	0.18055	0.89313	0.30293	1.1007	0.60978	0.96624	0.27102	0.95279	0.18386	1.0361	0.36078	0.91451	0.30016	0.99998	0.22924	0.83796	0.58177	0.95353	0.40205	0.99996	-0.049019	-0.27483	0.7505	0.98756	0.78345	0.92452	0.33685	1.2284	0.60073	0.96072	0.21929	0.60522
Atp13a1	4	0.038552	-0.45515	-0.562944	0.055755	0.24968	0.93732	0.99703	0.80284	0.97659	0.017203	0.070389	0.76615	0.98142	0.94388	0.99372	-0.61083	-2.7484	0.052158	0.69278	0.0059879	0.99998	-0.15568	-0.64298	0.56118	0.95144	0.52024	0.99996	-0.4721	-2.1023	0.23044	0.86182	0.035523	0.36187	0.090844	0.37378	0.97565	0.99866	0.70857	0.89675
Atp13a2	4	0.19035	0.253741	0.389335	0.56266	1.7945	0.12053	0.75823	0.072734	0.88163	0.37231	1.2315	0.47517	0.95291	0.21812	0.95279	-0.079509	-0.25413	0.8631	0.98838	0.7994	0.99998	-0.33325	-1.1062	0.29439	0.89137	0.26863	0.99996	0.33053	1.0531	0.55117	0.95786	0.29229	0.64726	-0.058805	-0.19484	0.72798	0.97483	0.84552	0.94901
Atp13a3	4	0.392266	-0.64954	0.61026	0.29877	0.94839	0.49855	0.92942	0.34293	0.91192	-0.093496	-0.30325	0.54715	0.96468	0.7617	0.98242	-0.35247	-1.1195	0.23568	0.87027	0.26291	0.99998	0.29707	0.9693	0.44477	0.93406	0.33239	0.99996	0.46903	1.4903	0.33379	0.89178	0.13616	0.50842	-0.14123	-0.45949	0.602	0.96072	0.64588	0.86875
Atp13a4	4	-0.02146	0.12057	0.472732	0.8129	2.163	0.018098	0.49582	0.030538	0.88163	0.83436	1.9647	0.035992	0.6354	0.049454	0.95279	0.45209	1.2125	0.04072	0.66364	0.22533	0.99998	0.33152	0.78838	0.38361	0.91802	0.43047	0.99996	0.51629	1.371	0.27385	0.87659	0.17038	0.54488	0.043558	0.10205	0.8939	0.99193	0.91872	0.97227
Atp1a1	4	-0.056553	-0.28376	0.633026	-0.15604	-0.28007	0.47806	0.92481	0.77943	0.97394	-0.099487	-0.20348	0.53612	0.96345	0.83876	0.98896	0.52529	0.9493	0.018199	0.52959	0.34247	0.99998	0.80905	1.7188	0.015505	0.46154	0.085642	0.99996	0.55651	1.0018	0.23064	0.86182	0.31643	0.66431	-0.076516	-0.15815	0.6992	0.97169	0.87434	0.95803
Atp1b1	4	0.75779	0.068854	0.033645	0.37566	1.2826	0.35143	0.89253	0.19962	0.89431	-0.38213	-1.1891	0.17188	0.83472	0.23442	0.95279	-0.036056	-0.12337	0.99797	0.99995	0.90182	0.99998	-0.10491	-0.3331	0.65457	0.96451	0.73906	0.99996	-0.059445	-0.20244	0.73235	0.98388	0.83957	0.9474	-0.09309	-0.29313	0.67389	0.96975	0.76942	0.92188
Atp1b3	4	0.10932	0.11055	0.70573	0.52263	0.95505	0.15683	0.78599	0.33955	0.91192	0.41331	0.56831	0.40461	0.93681	0.56982	0.95769	-0.4342	-0.79835	0.14915	0.82933	0.42467	0.99998	-0.54475	-0.76034	0.12262	0.77788	0.44705	0.99996	-0.26395	-0.4723	0.43358	0.92775	0.63671	0.86446	-0.96968	-1.2994	0.060343	0.66556	0.19379	0.58032
Atp23	4	0.44769	-0.43909	-0.00251	0.32374	0.95103	0.44461	0.91967	0.34159	0.91192	-0.12395	-0.28015	0.49438	0.95857	0.77936	0.98441	0.24563	0.7246	0.23883	0.87223	0.4687	0.99998	0.68472	1.5784	0.045397	0.63649	0.11447	0.99996	0.2085	0.61203	0.77312	0.98842	0.54052	0.81201	0.21101	0.48206	0.81475	0.98276	0.62976	0.85906
Atp2a2	4	-0.67904	-0.584511	0.80174	0.57146	0.80863	0.11413	0.75285	0.41873	0.92746	1.2505	1.0856	0.0005592	0.091667	0.27765	0.95279	0.097049	0.13759	0.58589	0.96717	0.89056	0.99998	0.68156	0.60179	0.047176	0.64242	0.54731	0.99996	0.84718	1.203	0.041584	0.59477	0.229	0.59687	0.04544	0.039043	0.89675	0.99193	0.96886	0.98866
Atp2a3	4	0.0962545	0.32663	-0.404004	0.0048635	0.014247	0.81323	0.98167	0.98863	0.99877	-0.091391	-0.29555	0.55086	0.96468	0.76758	0.98251	-0.28553	-0.83958	0.33872	0.91261	0.40114	0.99998	-0.61216	-1.9994	0.091302	0.73537	0.045565	0.98076	0.084296	0.24717	0.98709	0.99923	0.80478	0.93343	0.4883	1.5972	0.36831	0.91123	0.11022	0.48204
Atp2b1	4	0.28978	-0.82606	0.52001	0.17271	0.33982	0.78074	0.97772	0.73399	0.96742	-0.11707	-0.24501	0.50607	0.96089	0.80645	0.9872	-0.50114	-0.98573	0.10055	0.79183	0.32426	0.99998	0.32492	0.69669	0.39479	0.9222	0.486	0.99996	0.94419	1.8754	0.02069	0.49522	0.060734	0.4106	0.42418	0.90045	0.45707	0.93482	0.36788	0.722
Atp2c1	4	-0.43385	0.06573	-0.14648	-0.1836	-0.56481	0.43257	0.91475	0.5722	0.94467	0.25025	0.74188	0.71959	0.97874	0.45816	0.95614	-0.51715	-1.6032	0.091709	0.78522	0.10889	0.99998	-0.58288	-1.7384	0.10366	0.75444	0.082139	0.99996	0.15233	0.4715	0.88048	0.99535	0.63728	0.86462	0.29881	0.89116	0.66326	0.96846	0.37284	0.7261
Atp5a1	4	-1.49081	-0.36018	1.04888	-0.57975	-0.91155	0.073713	0.69341	0.362	0.91246	0.91106	0.79309	0.019826	0.52703	0.42773	0.95614	0.69962	1.1418	0.0022368	0.23158	0.25352	0.99998	1.0598	0.98749	0.0012709	0.15244	0.3234	0.99996	1.2588	2.0449	0.0013217	0.16352	0.040868	0.36889	0.20992	0.1805	0.81648	0.98276	0.85676	0.95237
Atp5b	4	-0.10456	0.43768	-0.48261	0.60015	1.1204	0.093539	0.72016	0.26253	0.89431	0.70471	1.1318	0.085964	0.73668	0.25773	0.95279	0.17061	0.32054	0.38925	0.92375	0.74856	0.99998	-0.26707	-0.43471	0.38	0.91763	0.66377	0.99996	0.3742	0.69694	0.48101	0.94658	0.48584	0.78092	0.85681	1.4031	0.060648	0.66556	0.1606	0.54487
Atp5c1	4	-0.31518	-0.640965	-0.85014	-0.56264	-0.74717	0.079813	0.7041	0.45496	0.93471	-0.24746	-0.41192	0.31036	0.9155	0.68039	0.97285	-0.050675	-0.071435	0.95557	0.99746	0.94305	0.99998	0.59029	1.0065	0.087845	0.73537	0.31419	0.99996	-0.62077	-0.82646	0.14621	0.79911	0.40854	0.73119	0.22937	0.38677	0.78268	0.97918	0.69893	0.89312
Atp5d	4	1.16674	0.187235	-0.3221	0.72097	1.0636	0.038534	0.58333	0.28749	0.89596	-0.44577	-0.79811	0.12587	0.79384	0.42481	0.95614	0.067095	0.098822	0.67612	0.97931	0.92128	0.99998	-0.12014	-0.22648	0.62651	0.96132	0.82083	0.99996	0.6918	1.0196	0.11067	0.74948	0.30793	0.65725	1.0139	1.9211	0.020131	0.52381	0.054717	0.40048
Atp5e	4	0.321853	-0.24128	-0.293722	0.015803	0.038441	0.84078	0.98664	0.96934	0.99616	-0.30605	-0.67505	0.24457	0.89487	0.49964	0.95614	-0.8843	-2.1743	0.011184	0.47619	0.02968	0.99998	-0.64302	-1.4821	0.079305	0.7232	0.13831	0.99996	-0.096132	-0.23513	0.67114	0.97332	0.81411	0.93764	0.19759	0.45392	0.83829	0.98855	0.64988	0.87112
Atp5g1	4	0.95721	-0.348442	-0.26936	0.62245	1.4086	0.080677	0.7041	0.15895	0.88954	-0.33476	-0.49035	0.21519	0.87567	0.62389	0.96413	0.016978	0.039273	0.82599	0.98712	0.96867	0.99998	0.36542	0.58825	0.32932	0.90522	0.55637	0.99996	-0.84253	-1.8139	0.073306	0.69595	0.069686	0.42757	-0.57317	-0.84755	0.19857	0.84233	0.39669	0.74083
Atp5g2	4	0.28037	0.124727	-0.13496	0.12783	0.33088	0.88735	0.99204	0.74074	0.96872	-0.15254	-0.41639	0.44644	0.94521	0.67712	0.97181	0.12188	0.31671	0.51817	0.95794	0.75146	0.99998	-0.0028471	-0.0078318	0.88094	0.99482	0.99375	0.99996	0.43507	1.1282	0.38264	0.91027	0.25925	0.62078	0.57003	1.567	0.26903	0.8772	0.11711	0.49131
Atp5g3	4	0.297561	-0.433859	-0.24308	0.076161	0.12324	0.98531	0.99774	0.90192	0.98684	-0.2214	-0.28103	0.34172	0.92106	0.77868	0.98441	0.015011	0.025	0.83285	0.98712	0.98006	0.99998	0.44887	0.59698	0.21016	0.84848	0.55052	0.99996	0.49987	0.8232	0.29378	0.8854	0.4104	0.73237	0.74295	0.97471	0.11814	0.76664	0.3297	0.69506
Atp5h	4	-1.25111	1.26046	-0.460362	-0.39712	-0.91464	0.17147	0.79957	0.36038	0.91246	0.85399	1.776	0.030858	0.60398	0.075729	0.95279	0.51809	1.267	0.02008	0.55076	0.20517	0.99998	-0.74237	-1.534	0.049464	0.64541	0.12503	0.99996	-0.078042	-0.18237	0.70022	0.97763	0.85529	0.95259	0.38232	0.79437	0.52565	0.94979	0.42698	0.75974
Atp5j	4	-1.73174	0.03917	-0.68753	-0.82396	-1.9098	0.019877	0.50375	0.056162	0.88163	0.90778	1.169	0.020487	0.5288	0.2424	0.95279	0.39439	0.96786	0.071628	0.7548	0.33311	0.99998	0.35522	0.46591	0.34375	0.90873	0.64128	0.99996	0.33327	0.8009	0.54659	0.9559	0.42319	0.74052	1.0208	1.332	0.019165	0.51989	0.18286	0.56896
Atp5j2	4	0.44773	-0.278467	-1.25742	0.29343	0.89505	0.50999	0.93396	0.37076	0.91292	-0.1543	-0.39318	0.44421	0.94508	0.69419	0.97491	-0.23911	-0.72808	0.43074	0.93744	0.46656	0.99998	0.039357	0.10137	0.97982	0.99778	0.91926	0.99996	-0.62485	-1.8943	0.14432	0.79502	0.058179	0.40725	0.63257	1.6279	0.20228	0.84426	0.10355	0.47311
Atp5k	4	-0.68795	0.454509	-0.39639	-0.39558	-0.69124	0.17259	0.8008	0.48941	0.93596	0.29237	0.46226	0.62956	0.96624	0.6439	0.96572	-0.063801	-0.11527	0.91322	0.99294	0.90823	0.99998	-0.51831	-0.83035	0.1396	0.79907	0.40634	0.99996	0.39553	0.70703	0.44329	0.93232	0.47955	0.77716	0.79192	1.279	0.08998	0.72023	0.20091	0.58809
Atp5l	4	-0.60265	-0.0486	-0.52104	-0.40467	-1.115	0.16501	0.79368	0.26486	0.89431	0.19798	0.46136	0.83305	0.9877	0.64454	0.96572	0.10731	0.30519	0.55813	0.96474	0.76022	0.99998	0.15591	0.37314	0.74516	0.97981	0.70905	0.99996	-0.37666	-1.0413	0.31163	0.89053	0.29775	0.65141	0.14438	0.33951	0.92949	0.99407	0.73422	0.90773
Atp5md	4	0.217889	0.01493	-0.147866	0.11797	0.33075	0.912	0.99678	0.74084	0.96872	-0.099919	-0.26501	0.53556	0.96345	0.791	0.98631	-0.2708	-0.77267	0.36556	0.91489	0.43972	0.99998	-0.28573	-0.77608	0.35489	0.90873	0.4377	0.99996	-0.060665	-0.17026	0.73031	0.98351	0.8648	0.95589	0.087201	0.23474	0.96894	0.99759	0.81441	0.9382
Atp5mpl	4	-0.69669	0.18584	0.55776	0.17568	0.34512	0.77434	0.97685	0.73	0.96712	0.87237	1.8063	0.027045	0.58333	0.070865	0.95279	0.33579	0.69605	0.12099	0.80351	0.4864	0.99998	0.14995	0.31604	0.76	0.98051	0.75197	0.99996	0.88041	1.8049	0.033044	0.55321	0.071097	0.43076	0.32265	0.66516	0.62371	0.96508	0.50595	0.80204
Atp6ap1	4	-1.03674	-0.16817	-0.49058	-0.52709	-1.7391	0.0942	0.72071	0.082026	0.88163	0.50965	1.4243	0.26267	0.89851	0.15437	0.95279	0.22298	0.73608	0.27909	0.89079	0.46168	0.99998	0.39115	1.0961	0.28966	0.88917	0.27301	0.99996	-0.30162	-0.99322	0.38951	0.91324	0.3206	0.66754	0.18896	0.52924	0.85324	0.99092	0.59664	0.84531
Atp6ap2	4	-1.00602	-0.066154	-0.23193	-0.21064	-0.85993	0.39068	0.90475	0.38983	0.9183	0.79538	2.4165	0.046414	0.65873	0.015672	0.95279	-0.16481	-0.6841	0.61095	0.97167	0.49391	0.99998	-0.098656	-0.30151	0.66641	0.96705	0.76302	0.99996	0.12794	0.52668	0.92878	0.997	0.59842	0.84364	0.35987	1.094	0.56225	0.95562	0.27397	0.65841
Atp6v0a1	4	0.34573	0.10055	0.34732	0.49753	1.06	0.18276	0.80864	0.28912	0.89715	0.1518	0.32411	0.9395	0.99251	0.74585	0.98236	0.57235	1.224	0.011286	0.47845	0.22095	0.99998	0.4718	1.0318	0.18601	0.82903	0.30215	0.99996	0.49784	1.0599	0.29627	0.88659	0.28921	0.64592	0.15052	0.32422	0.91988	0.99298	0.74577	0.91373
Atp6v0b	4	-0.0049	-0.01274	-0.74128	-1.2015	-2.1293	0.002186	0.19027	0.033226	0.88163	-1.1966	-1.2799	0.0013726	0.14835	0.2006	0.95279	0.14522	0.26897	0.45483	0.94572	0.78795	0.99998	0.15796	0.18087	0.74084	0.97913	0.85647	0.99996	-1.4972	-2.6437	0.0078796	0.35426	0.0082001	0.20696	-0.75592	-0.80917	0.11601	0.76449	0.41841	0.75448
Atp6v0c	4	0.25289	0.26213	1.60768	0.33443	0.70766	0.4223	0.9128	0.47916	0.93596	0.08154	0.15121	0.90392	0.99169	0.87981	0.99049	-0.14628	-0.31175	0.66199	0.97714	0.75523	0.99998	-0.40841	-0.78138	0.21966	0.85576	0.43458	0.99996	-0.073118	-0.15387	0.70825	0.97927	0.87771	0.96012	-1.6808	-3.0188	0.0075238	0.36973	0.0025379	0.10302
Atp6v0d1	4	-0.559538	-0.75684	0.235345	-0.087058	-0.1988	0.61085	0.95433	0.84242	0.98118	0.47248	0.93237	0.31198	0.9155	0.35114	0.9542	-0.28375	-0.66345	0.34147	0.91261	0.50704	0.99998	0.47309	0.96906	0.18423	0.82846	0.33252	0.99996	0.17278	0.39958	0.8392	0.99256	0.68947	0.88637	-0.062565	-0.12318	0.72147	0.9741	0.90196	0.96726
Atp6v0d2	4	0.13001	0.3399	-0.00804	0.37664	1.4769	0.35011	0.89253	0.13971	0.88303	0.24663	0.86782	0.72731	0.9798	0.38549	0.95614	0.11686	0.46008	0.53256	0.96256	0.64546	0.99998	-0.22304	-0.79599	0.44675	0.93406	0.42604	0.99996	0.14415	0.56469	0.8969	0.99608	0.57229	0.82811	0.15219	0.53901	0.91698	0.99285	0.58988	0.84304
Atp6v0e	4	-0.621762	-0.24259	0.16693	0.033218	0.059334	0.88384	0.99139	0.95269	0.99386	0.65498	0.98191	0.11819	0.77975	0.32615	0.95279	0.17984	0.32743	0.36872	0.91673	0.74334	0.99998	0.42243	0.64901	0.24432	0.86665	0.51633	0.99996	0.28605	0.51382	0.62895	0.96991	0.60738	0.84778	0.11912	0.17834	0.97438	0.99866	0.85845	0.95242
Atp6v0e2	4	0.547843	0.0925	0.02037	-0.023137	-0.086377	0.74739	0.97387	0.93117	0.99143	-0.57098	-1.6177	0.068426	0.70114	0.10573	0.95279	-0.2636	-0.99528	0.38005	0.92012	0.3196	0.99998	-0.3561	-1.0286	0.26969	0.87731	0.30367	0.99996	0.14805	0.55581	0.88933	0.99596	0.57834	0.83089	0.12768	0.36759	0.95847	0.99642	0.71318	0.8988
Atp6v1a	4	-0.21558	0.080888	0.2882	0.72021	0.90033	0.038636	0.58333	0.36795	0.91246	0.93579	1.0429	0.016318	0.49014	0.29701	0.95279	0.050551	0.063681	0.72487	0.97931	0.94922	0.99998	-0.030337	-0.034034	0.81648	0.98846	0.97285	0.99996	1.3446	1.7125	0.00050836	0.10638	0.086806	0.45265	1.0564	1.188	0.014844	0.48882	0.23485	0.61825
Atp6v1b2	4	0.96984	1.22188	0.71935	0.33347	0.3097	0.42423	0.91302	0.75679	0.97156	-0.63637	-1.2321	0.048599	0.67015	0.21792	0.95279	0.56957	0.53523	0.011845	0.48582	0.59249	0.99998	-0.65231	-1.2762	0.075949	0.71483	0.20188	0.99996	-0.21209	-0.19562	0.50186	0.95035	0.84491	0.94913	-0.93144	-1.8143	0.067816	0.68258	0.069636	0.42599
Atp6v1c1	4	-0.902557	-0.23608	-0.39044	-0.031057	-0.053824	0.72904	0.97201	0.95708	0.99432	0.8715	1.3504	0.027401	0.58715	0.17689	0.95279	0.21639	0.37482	0.29378	0.89764	0.7078	0.99998	0.45247	0.70924	0.20629	0.84725	0.47818	0.99996	0.30583	0.52929	0.59392	0.96466	0.59661	0.84234	0.69627	1.0844	0.15083	0.8095	0.27819	0.66124
Atp6v1d	4	0.299433	-0.28577	0.39765	0.31599	0.48341	0.46017	0.91992	0.6288	0.95213	0.016557	0.02293	0.76448	0.98142	0.98171	0.99732	-0.62987	-0.96053	0.046973	0.68312	0.33679	0.99998	-0.3441	-0.48473	0.28224	0.88309	0.62786	0.99996	0.73891	1.1372	0.084337	0.70712	0.25545	0.6187	0.34126	0.47928	0.59356	0.96072	0.63174	0.86053
Atp6v1e1	4	0.97593	1.01326	0.64315	0.30277	0.75466	0.49037	0.92841	0.45045	0.93404	-0.67316	-1.5586	0.039246	0.6354	0.11908	0.95279	0.31794	0.81237	0.13802	0.81732	0.41658	0.99998	-0.69532	-1.6629	0.061919	0.68172	0.096334	0.99996	-0.29827	-0.73425	0.39337	0.91603	0.46279	0.76718	-0.94142	-2.1942	0.065731	0.67661	0.02822	0.33181
Atp6v1f	4	1.13267	-0.50693	-0.509236	0.80534	1.2697	0.019064	0.50336	0.20418	0.89431	-0.32733	-0.57135	0.22205	0.8794	0.56776	0.95769	-0.25094	-0.39342	0.40466	0.92485	0.69401	0.99998	0.25599	0.48406	0.52661	0.94613	0.62834	0.99996	-0.58319	-0.90951	0.16486	0.81757	0.36308	0.69971	-0.073954	-0.1328	0.70337	0.97169	0.89435	0.9642
Atp6v1g1	4	1.05191	0.018764	-0.32837	0.076817	0.15655	0.98648	0.99774	0.8756	0.98198	-0.97509	-1.7447	0.0063545	0.33512	0.081033	0.95279	-0.040345	-0.083276	0.98948	0.9998	0.93363	0.99998	-0.059109	-0.1161	0.75258	0.98009	0.90757	0.99996	0.18174	0.37181	0.82177	0.99003	0.71003	0.89346	0.51011	0.99025	0.34192	0.90832	0.32205	0.69115
Atp6v1g2	4	-0.139447	0.288876	-0.15884	0.027683	0.082252	0.87159	0.9905	0.93445	0.99143	0.16713	0.47744	0.90417	0.99169	0.63305	0.96572	0.064746	0.19882	0.68278	0.97931	0.8424	0.99998	-0.22413	-0.65316	0.44482	0.93406	0.51365	0.99996	-0.2842	-0.84122	0.41025	0.92393	0.40022	0.72656	-0.12536	-0.35961	0.62447	0.96512	0.71914	0.90089
Atp6v1h	4	-1.48148	0.3482	0.37999	-0.98811	-2.739	0.0081338	0.37647	0.0061633	0.53175	0.49337	1.3243	0.2825	0.90247	0.18541	0.95279	0.14626	0.41045	0.45178	0.94572	0.68147	0.99998	-0.20194	-0.54468	0.48045	0.93879	0.58598	0.99996	0.15838	0.44205	0.86915	0.99517	0.65845	0.87451	-0.22161	-0.59562	0.50074	0.94614	0.55143	0.82613
Atp7a	4	-0.09947	-0.09484	-0.34443	0.33041	0.82641	0.43028	0.91413	0.40857	0.92494	0.42988	1.2161	0.37787	0.92899	0.22394	0.95279	0.43055	1.0886	0.051853	0.69059	0.27633	0.99998	0.52539	1.5227	0.13334	0.79066	0.12783	0.99996	0.27737	0.69469	0.64496	0.97256	0.48725	0.78139	0.6218	1.783	0.21468	0.85021	0.074593	0.43364
Atp7b	4	-0.435623	0.01179	0.02239	-0.0061626	-0.026103	0.78659	0.97782	0.97917	0.99688	0.42946	1.4294	0.37822	0.92899	0.15289	0.95279	0.22001	0.95002	0.2855	0.8927	0.3421	0.99998	0.20822	0.70585	0.62859	0.96132	0.48028	0.99996	0.20658	0.88111	0.77591	0.98842	0.37826	0.71046	0.18419	0.61577	0.86239	0.99092	0.53805	0.81769
Atp8a1	4	-0.3136	0.11763	0.459488	0.40117	1.0238	0.31142	0.87828	0.30595	0.90447	0.71477	1.2375	0.079915	0.72723	0.21591	0.95279	-0.35683	-0.91206	0.2309	0.86728	0.36174	0.99998	-0.47446	-0.82273	0.1674	0.81794	0.41066	0.99996	-0.040122	-0.10207	0.76676	0.98842	0.9187	0.97467	-0.49961	-0.86081	0.24229	0.86574	0.38935	0.73716
Atp8a2	4	0.024988	-0.05436	0.16254	-0.058238	-0.22144	0.66855	0.96091	0.82475	0.97908	-0.083226	-0.33265	0.56667	0.96574	0.7394	0.98236	0.1104	0.42586	0.55015	0.96474	0.67021	0.99998	0.16476	0.67001	0.72574	0.97634	0.50285	0.99996	-0.20679	-0.7862	0.50892	0.95035	0.43175	0.74578	-0.36933	-1.4812	0.34243	0.90843	0.13856	0.52091
Atp8b2	4	0.21058	-0.603506	-0.00372	0.64604	1.298	0.067765	0.67801	0.19427	0.89431	0.43546	0.94218	0.36841	0.92762	0.3461	0.9542	-0.53662	-1.0743	0.082812	0.77262	0.28269	0.99998	0.066886	0.14704	0.95567	0.99656	0.8831	0.99996	0.64228	1.2929	0.14737	0.80044	0.19605	0.57124	0.646	1.4144	0.1914	0.84021	0.15725	0.54108
Atp8b4	4	-0.29917	-0.53885	0.10288	0.27812	0.92631	0.54461	0.94329	0.35429	0.91246	0.57729	1.9887	0.18413	0.84527	0.046737	0.95279	-0.39621	-1.3204	0.18581	0.83753	0.18669	0.99998	0.14264	0.49262	0.77652	0.98287	0.62228	0.99996	-0.42043	-1.3928	0.27197	0.87647	0.16367	0.53662	-0.52331	-1.8029	0.22714	0.85579	0.071409	0.43027
Atp8b5	4	-0.442566	-0.54273	-0.304544	-0.044276	-0.18474	0.69864	0.96721	0.85343	0.98175	0.39829	1.2851	0.43124	0.94345	0.19876	0.95279	-0.37748	-1.5969	0.20619	0.85156	0.1103	0.99998	0.16525	0.54088	0.72472	0.97631	0.58859	0.99996	-0.3553	-1.4776	0.33272	0.89178	0.13952	0.51218	-0.050756	-0.16385	0.73992	0.97483	0.86985	0.95644
Atp9a	4	0.28976	0.81269	-0.2196	-0.38503	-1.1989	0.18169	0.80864	0.23057	0.89431	-0.67479	-1.6479	0.038941	0.6354	0.099381	0.95279	-0.34681	-1.1126	0.24269	0.87256	0.26589	0.99998	-1.1595	-2.9232	0.0074221	0.36973	0.0034649	0.41815	-0.46047	-1.4407	0.24005	0.86554	0.14966	0.52289	-0.24087	-0.60676	0.47562	0.94068	0.54401	0.8214
Atp9b	4	-0.5277	-0.04851	-0.7016	0.15056	0.451	0.83255	0.9844	0.65199	0.95545	0.67826	1.2907	0.10121	0.75292	0.1968	0.95279	0.17618	0.54448	0.37726	0.91958	0.58611	0.99998	0.22469	0.43672	0.59107	0.95601	0.66231	0.99996	-0.06536	-0.19575	0.72147	0.98147	0.84481	0.94913	0.63624	1.2243	0.19862	0.84233	0.22083	0.60623
Atpaf1	4	-0.62108	0.417942	0.19063	0.24084	0.50174	0.62473	0.95634	0.61585	0.94969	0.86192	1.5411	0.028977	0.59252	0.12329	0.95279	-0.068488	-0.14307	0.89746	0.9923	0.88623	0.99998	-0.48643	-0.87047	0.1583	0.81111	0.38404	0.99996	1.0331	2.1627	0.0095064	0.37624	0.030562	0.34628	0.84247	1.514	0.066697	0.67835	0.13003	0.50893
Atpaf2	4	-0.88107	-0.91255	-0.62303	-0.20915	-0.76598	0.39307	0.90475	0.44369	0.93143	0.67192	1.1921	0.10579	0.76328	0.23322	0.95279	-0.24871	-0.9122	0.40928	0.92778	0.36167	0.99998	0.66384	1.1858	0.053175	0.65037	0.23571	0.99996	0.41507	1.5231	0.41371	0.92393	0.12774	0.50111	1.0381	1.8517	0.016878	0.50379	0.064065	0.41769
Atpsckmt	4	0.53205	-0.6236	1.79944	0.4061	0.88055	0.3042	0.87605	0.37856	0.91334	-0.12595	-0.20367	0.49042	0.95666	0.83861	0.98896	-0.8994	-1.9359	0.010218	0.46101	0.052884	0.99998	-0.2758	-0.47989	0.36744	0.90873	0.63131	0.99996	-0.82706	-1.7004	0.077729	0.7037	0.089047	0.45436	-2.6265	-3.5831	0.00081338	0.17308	0.00033951	0.029682
Atr	4	-0.984964	0.395493	0.15082	-0.8857	-2.6824	0.014082	0.45719	0.0073085	0.57737	0.099264	0.18795	0.94205	0.99251	0.85092	0.98937	-0.081117	-0.25294	0.85705	0.98764	0.80031	0.99998	-0.47661	-0.92037	0.16573	0.81622	0.35738	0.99996	0.35371	1.0942	0.51294	0.95126	0.27388	0.63202	0.20289	0.38956	0.82899	0.98615	0.69686	0.89204
Atraid	4	-0.47975	0.205309	0.06046	-0.67002	-2.5101	0.044329	0.60331	0.01207	0.71088	-0.19027	-0.58825	0.38615	0.93107	0.55637	0.95697	-0.032171	-0.12154	0.98597	0.9998	0.90327	0.99998	-0.23748	-0.7474	0.42296	0.92836	0.45482	0.99996	-0.014824	-0.055781	0.81206	0.99003	0.95552	0.98698	-0.075284	-0.23488	0.70118	0.97169	0.8143	0.9382
Atrip	4	0.25078	1.34904	0.398215	-0.52874	-0.88245	0.093539	0.72016	0.37753	0.91303	-0.77952	-1.2918	0.021758	0.535	0.19644	0.95279	0.075541	0.13077	0.64999	0.97618	0.89596	0.99998	-1.2735	-2.1405	0.0045244	0.30375	0.032315	0.95732	0.47751	0.81754	0.32342	0.89053	0.41362	0.73418	0.079295	0.1343	0.95476	0.9964	0.89317	0.9637
Atrn	4	-0.520754	-0.65516	-0.04386	0.057666	0.21447	0.94144	0.99703	0.83018	0.97993	0.57842	1.2882	0.18281	0.84437	0.19769	0.95279	0.04672	0.1743	0.73677	0.98033	0.86163	0.99998	0.70188	1.5794	0.039144	0.61685	0.11423	0.99996	-0.17454	-0.6478	0.55381	0.95896	0.51711	0.79762	-0.13068	-0.29049	0.61736	0.96338	0.77144	0.92268
Atrnl1	4	-0.24791	0.13628	0.151419	-0.60589	-2.2835	0.063952	0.66915	0.022401	0.84094	-0.35798	-1.2439	0.19242	0.85575	0.21354	0.95279	0.39793	1.5338	0.069036	0.75124	0.12508	0.99998	0.26165	0.92452	0.51487	0.9439	0.35522	0.99996	0.068641	0.26176	0.95781	0.99862	0.79351	0.92939	-0.082778	-0.29034	0.68827	0.97055	0.77156	0.92268
Atrx	4	0.80566	-0.591563	0.42461	-0.15732	-0.50311	0.47598	0.92381	0.61489	0.94929	-0.96298	-2.3416	0.0068121	0.34715	0.019199	0.95279	-0.030403	-0.097659	0.97997	0.99959	0.9222	0.99998	0.56116	1.3864	0.10538	0.75793	0.16564	0.99996	-0.13484	-0.43077	0.61415	0.96958	0.66663	0.87757	-0.55945	-1.3713	0.20528	0.84426	0.17027	0.55568
Atxn1	4	0.266582	0.777017	-0.25342	0.23257	0.61381	0.64257	0.95907	0.53934	0.93928	-0.034012	-0.072723	0.66026	0.96976	0.94203	0.99372	-0.015943	-0.043173	0.93356	0.99572	0.96556	0.99998	-0.79296	-1.73	0.039551	0.6171	0.083622	0.99996	0.33529	0.89399	0.54359	0.95551	0.37133	0.70544	0.58871	1.2989	0.24874	0.8665	0.19396	0.58043
Atxn10	4	0.782185	0.265363	-0.0836	-0.012575	-0.035644	0.7719	0.97596	0.97157	0.99649	-0.79476	-2.1263	0.020182	0.5288	0.033481	0.95279	0.067043	0.19196	0.67633	0.97931	0.84777	0.99998	-0.19832	-0.54208	0.48676	0.93879	0.58777	0.99996	-0.26414	-0.74662	0.43338	0.92775	0.45529	0.76269	-0.18054	-0.48961	0.5504	0.95412	0.62441	0.85732
Atxn1l	4	-0.20464	0.22264	-0.19487	0.24233	0.72302	0.62183	0.95625	0.46967	0.93596	0.44697	0.9128	0.35102	0.92115	0.36135	0.9542	-0.2451	-0.73777	0.41716	0.93186	0.46066	0.99998	-0.46774	-0.96003	0.17294	0.82363	0.33704	0.99996	-0.46966	-1.3847	0.23212	0.86182	0.16615	0.53976	-0.27479	-0.55912	0.43795	0.93132	0.57608	0.83579
Atxn2	4	0.255662	-0.15134	-0.1586	-0.058508	-0.20455	0.66799	0.9606	0.83792	0.98118	-0.31417	-0.98742	0.23639	0.89077	0.32344	0.95279	-0.31126	-1.0982	0.29455	0.8978	0.2721	0.99998	-0.15992	-0.51122	0.55371	0.95013	0.60919	0.99996	0.3291	1.1587	0.55391	0.95896	0.24658	0.61204	0.4877	1.5561	0.36902	0.91123	0.11969	0.49462
Atxn2l	4	-0.42939	-0.56657	0.12981	0.5258	1.2787	0.15388	0.78583	0.20101	0.89431	0.95519	1.8124	0.013472	0.45299	0.069924	0.95279	-0.23754	-0.57909	0.43399	0.93793	0.56253	0.99998	0.32903	0.63158	0.38707	0.91958	0.52766	0.99996	0.6608	1.6135	0.13202	0.77948	0.10664	0.47407	0.53099	1.0085	0.31605	0.89588	0.3132	0.68512
Atxn3	4	-0.071857	0.336137	0.461682	-0.03668	-0.093406	0.71577	0.96877	0.92558	0.99078	0.035177	0.087197	0.80535	0.98483	0.93051	0.99305	0.0045166	0.011744	0.86518	0.98838	0.99063	0.99998	-0.33162	-0.84539	0.29566	0.89175	0.3979	0.99996	0.52523	1.3575	0.26379	0.87176	0.17462	0.54927	0.063548	0.15986	0.92654	0.99346	0.87299	0.95783
Atxn7	4	-0.18812	0.37927	0.24066	0.04829	0.19249	0.91892	0.99682	0.84736	0.98175	0.23641	0.89935	0.75014	0.98142	0.36847	0.9542	0.25183	1.0159	0.22734	0.86689	0.30967	0.99998	-0.12744	-0.49091	0.61415	0.95965	0.62349	0.99996	0.11141	0.44526	0.96172	0.99889	0.65613	0.87279	-0.12925	-0.49269	0.61883	0.96338	0.62223	0.85588
Atxn7l1	4	0.01654	0.60137	0.04638	0.23457	1.0728	0.63784	0.95868	0.28335	0.89595	0.21803	0.85581	0.78761	0.9815	0.3921	0.95614	0.35296	1.633	0.10569	0.79954	0.10248	0.99998	-0.24841	-0.98736	0.40628	0.92497	0.32346	0.99996	-0.26474	-1.2047	0.43262	0.92775	0.22833	0.59632	-0.31112	-1.2201	0.39962	0.92283	0.22242	0.60766
Atxn7l2	4	-0.35611	0.155753	0.468499	0.68159	1.6491	0.05165	0.63342	0.099134	0.88163	1.0377	2.0128	0.0066595	0.34715	0.044139	0.95279	0.036763	0.088806	0.76453	0.982	0.92924	0.99998	-0.11899	-0.23115	0.62823	0.96132	0.8172	0.99996	0.54682	1.3213	0.24152	0.86554	0.1864	0.56127	0.078321	0.15184	0.95277	0.9964	0.87931	0.95981
Atxn7l3	4	-2.02928	-0.52381	2.05879	-1.2494	-2.1748	0.0018809	0.17874	0.029645	0.88163	0.77988	1.0518	0.051853	0.67758	0.29287	0.95279	-0.64135	-1.122	0.043821	0.67185	0.26185	0.99998	-0.11754	-0.16055	0.63093	0.96132	0.87244	0.99996	0.59329	1.0451	0.19196	0.83399	0.29599	0.65051	-1.4655	-1.8971	0.014692	0.48882	0.057817	0.4051
Atxn7l3b	4	0.42375	0.24712	0.510899	0.18151	0.5066	0.76066	0.97512	0.61243	0.94914	-0.24224	-0.63447	0.3164	0.91637	0.52577	0.95614	-0.69592	-1.9535	0.031468	0.61782	0.050766	0.99998	-0.94304	-2.5213	0.019724	0.49807	0.011693	0.70672	-0.071221	-0.19863	0.71105	0.97949	0.84256	0.94844	-0.58212	-1.5296	0.19445	0.84131	0.1261	0.50357
AU022252	4	0.49722	-0.149746	-0.17732	0.60448	0.8655	0.090844	0.72016	0.38677	0.91722	0.10726	0.19756	0.95948	0.99525	0.84339	0.98899	0.029864	0.04338	0.78593	0.982	0.9654	0.99998	0.17961	0.34545	0.69153	0.97304	0.72975	0.99996	0.75051	1.0855	0.079	0.70508	0.27768	0.63492	0.92783	1.7757	0.037924	0.6024	0.075782	0.43574
AU040320	4	-0.89861	0.162642	0.009283	-0.17857	-0.7727	0.44055	0.91782	0.4397	0.93084	0.72004	1.8924	0.076864	0.72344	0.058433	0.95279	-0.086298	-0.37603	0.84215	0.98712	0.7069	0.99998	-0.24894	-0.65631	0.40547	0.92497	0.51162	0.99996	-0.027069	-0.11735	0.78893	0.98842	0.90658	0.97029	-0.036352	-0.095393	0.7632	0.97722	0.924	0.97459
Auh	4	0.391564	-0.00655	-0.23088	0.4079	1.1031	0.30187	0.87605	0.27	0.89431	0.016336	0.041819	0.76412	0.98142	0.96664	0.99538	-0.29532	-0.80043	0.32123	0.90839	0.42346	0.99998	-0.28877	-0.74656	0.35057	0.90873	0.45533	0.99996	0.61846	1.6779	0.16867	0.82091	0.093358	0.45842	0.84934	2.1985	0.0638	0.67237	0.02791	0.33081
Aunip	4	0.158515	0.288626	0.409878	-0.012145	-0.040055	0.77256	0.97617	0.96805	0.99576	-0.17066	-0.47167	0.41772	0.93813	0.63716	0.96572	0.076616	0.25776	0.64689	0.97593	0.79659	0.99998	-0.21201	-0.60094	0.46352	0.93569	0.54788	0.99996	-0.080742	-0.26675	0.69564	0.9768	0.78966	0.92771	-0.49062	-1.3605	0.24818	0.8665	0.17366	0.55949
Aup1	4	0.34987	0.07535	1.01246	0.47119	1.0861	0.21321	0.82673	0.27744	0.89431	0.12132	0.2265	0.99166	0.99923	0.82081	0.98844	-0.15028	-0.34776	0.65152	0.97669	0.72802	0.99998	-0.22563	-0.42746	0.44253	0.93406	0.66904	0.99996	0.010663	0.024446	0.85552	0.99286	0.9805	0.99339	-1.0018	-1.8599	0.055717	0.65351	0.062894	0.41514
Aurka	4	0.00418	0.46925	0.52541	-0.27838	-0.5774	0.29272	0.87209	0.56367	0.94401	-0.28256	-0.46952	0.26811	0.89851	0.6387	0.96572	0.57749	1.2238	0.010828	0.4702	0.22102	0.99998	0.10824	0.18358	0.85807	0.99357	0.85435	0.99996	-0.15412	-0.31982	0.58319	0.96374	0.74911	0.90955	-0.67953	-1.1342	0.14682	0.80594	0.2567	0.63971
Aurkaip1	4	0.02355	0.02491	0.0286316	-0.08721	-0.28605	0.61054	0.95433	0.77484	0.97371	-0.11076	-0.32237	0.517	0.96296	0.74717	0.98236	-0.34901	-1.1565	0.23974	0.87223	0.24747	0.99998	-0.37392	-1.0985	0.25245	0.87106	0.27199	0.99996	0.0094916	0.031242	0.85364	0.99286	0.97508	0.99191	-0.01914	-0.056064	0.78913	0.98069	0.95529	0.98421
Aurkb	4	-0.14886	0.3135	0.21828	-0.73062	-1.2562	0.032179	0.57233	0.20905	0.89431	-0.58176	-0.66336	0.064105	0.69048	0.5071	0.95614	0.12317	0.24122	0.51406	0.95794	0.80938	0.99998	-0.19033	-0.24951	0.49977	0.94041	0.80297	0.99996	0.59415	1.1296	0.19089	0.83315	0.25864	0.62034	0.37587	0.47587	0.53571	0.95016	0.63416	0.86188
Aven	4	0.09286	0.03246	-0.4705	0.27399	0.89397	0.55366	0.9455	0.37134	0.91292	0.18113	0.59089	0.87347	0.98925	0.55459	0.95697	0.26349	0.87228	0.20812	0.85292	0.38306	0.99998	0.23103	0.77394	0.57791	0.95311	0.43897	0.99996	-0.23558	-0.7638	0.46896	0.94306	0.44498	0.75617	0.23492	0.77612	0.77322	0.97757	0.43768	0.76443
Avil	4	-0.226915	-0.0624093	0.23316	-0.034305	-0.10414	0.72045	0.9697	0.91706	0.98892	0.19261	0.62948	0.84581	0.98783	0.52904	0.95614	-0.063383	-0.19422	0.91434	0.99294	0.846	0.99998	-0.00097373	-0.0032316	0.88481	0.99482	0.99742	0.99996	-0.40986	-1.2398	0.28118	0.87889	0.21504	0.58587	-0.64302	-2.0918	0.16278	0.81934	0.036458	0.36274
Avl9	4	0.57533	0.087295	0.01578	0.3956	1.3575	0.32062	0.88222	0.17463	0.89157	-0.17973	-0.57521	0.40354	0.93681	0.56515	0.95746	-0.044685	-0.15408	0.97494	0.99891	0.87755	0.99998	-0.13198	-0.43493	0.60551	0.95815	0.66361	0.99996	-0.13874	-0.47362	0.60744	0.96824	0.63577	0.86403	-0.15452	-0.50043	0.58314	0.95951	0.61677	0.85305
Avpi1	4	-0.185035	-0.52306	0.13284	-0.089027	-0.27266	0.60719	0.95433	0.78511	0.9748	0.096008	0.32347	0.93478	0.99251	0.74634	0.98236	-0.11468	-0.35497	0.75426	0.98162	0.72261	0.99998	0.40838	1.4059	0.26318	0.87525	0.15975	0.99996	0.71504	2.2137	0.097097	0.72376	0.026852	0.3341	0.5822	1.9921	0.25642	0.87297	0.046359	0.38971
AW146154	4	-0.97253	-0.06668	-0.23379	-0.53793	-1.6121	0.090133	0.71804	0.10693	0.88163	0.4346	1.4009	0.36968	0.92802	0.16125	0.95279	0.21798	0.67197	0.29048	0.89409	0.5016	0.99998	0.28466	0.93027	0.4682	0.93643	0.35223	0.99996	-0.45012	-1.3524	0.24823	0.86778	0.17625	0.55027	-0.21633	-0.69601	0.50597	0.94671	0.48642	0.79006
AW209491	4	0.044865	0.38056	-0.046897	0.11391	0.32077	0.92202	0.99682	0.74838	0.97016	0.069045	0.19285	0.87647	0.98925	0.84708	0.98918	-0.40644	-1.1553	0.17549	0.8362	0.24798	0.99998	-0.787	-2.2155	0.040618	0.6171	0.026724	0.93735	0.028032	0.079168	0.88669	0.99544	0.9369	0.98073	0.074929	0.21075	0.94738	0.9964	0.83309	0.94588
AW549877	4	-0.316393	0.29383	-0.2057	-0.31312	-0.81767	0.252	0.85057	0.41355	0.92576	0.0032732	0.0079368	0.73428	0.98083	0.99367	0.99924	0.16202	0.43508	0.40949	0.92778	0.6635	0.99998	-0.13181	-0.33251	0.60607	0.95815	0.73951	0.99996	-1.6737	-4.2814	0.0051345	0.30606	1.8568e-05	0.0041984	-1.468	-3.4539	0.01459	0.48882	0.00055257	0.04071
Awat2	4	-0.169872	-0.03767	0.41505	0.050378	0.15327	0.92395	0.99682	0.87818	0.98223	0.22025	0.47264	0.78268	0.98142	0.63647	0.96572	0.16121	0.50021	0.41106	0.92793	0.61693	0.99998	0.19888	0.43748	0.64953	0.96335	0.66177	0.99996	0.52962	1.6328	0.25932	0.87176	0.10252	0.46692	0.11457	0.24774	0.98322	0.99912	0.80433	0.93461
Axin1	4	-0.151332	0.376678	0.056664	0.084298	0.17217	0.99659	0.99929	0.86331	0.98175	0.23563	0.48432	0.75161	0.98142	0.62816	0.96518	-0.0071215	-0.014758	0.90397	0.99294	0.98822	0.99998	-0.3838	-0.8044	0.24229	0.86563	0.42117	0.99996	-0.028395	-0.057982	0.787	0.98842	0.95376	0.98656	-0.085059	-0.17549	0.68446	0.97021	0.8607	0.95359
Axl	4	0.382929	-0.295437	0.00704	0.44356	1.3602	0.24752	0.84767	0.17377	0.89157	0.060631	0.12513	0.85873	0.98887	0.90042	0.99163	-0.057907	-0.17859	0.93091	0.99533	0.85826	0.99998	0.23753	0.50397	0.56403	0.95146	0.61428	0.99996	-0.11498	-0.35047	0.64303	0.97256	0.72598	0.89887	-0.12202	-0.25324	0.62996	0.9673	0.80008	0.93237
Azgp1	4	0.125365	-0.09814	-0.13347	0.11083	0.32336	0.92964	0.99695	0.74642	0.96974	-0.014535	-0.044131	0.69793	0.97453	0.9648	0.99521	0.11324	0.33094	0.54212	0.96455	0.74069	0.99998	0.21138	0.65347	0.62132	0.96132	0.51346	0.99996	0.61463	1.7956	0.17188	0.82283	0.072563	0.4326	0.7481	2.3075	0.1157	0.76409	0.021027	0.3074
Azi2	4	-0.09497	0.62215	-0.363487	0.52713	1.8532	0.15225	0.78551	0.063857	0.88163	0.6221	1.75	0.14331	0.81415	0.080113	0.95279	0.353	1.2445	0.10564	0.79954	0.21331	0.99998	-0.26915	-0.76143	0.37685	0.91639	0.4464	0.99996	-0.052097	-0.1825	0.74541	0.98663	0.85519	0.95259	0.31139	0.87791	0.64293	0.96839	0.37999	0.73119
Azin1	4	0.78699	-0.104824	-0.112738	0.61299	1.8246	0.085862	0.7156	0.068065	0.88163	-0.174	-0.63532	0.41279	0.93813	0.52522	0.95614	-0.17875	-0.53431	0.57262	0.96717	0.59313	0.99998	-0.073926	-0.27579	0.72045	0.97617	0.78271	0.99996	-0.18453	-0.54295	0.53973	0.95546	0.58716	0.83642	-0.071792	-0.26498	0.70596	0.97169	0.79102	0.92997
Azin2	4	0.21009	-0.15992	-0.274896	0.29814	0.97751	0.49962	0.92942	0.32831	0.91164	0.08805	0.24093	0.91871	0.99251	0.80961	0.98772	-0.03352	-0.11016	0.99014	0.9998	0.91228	0.99998	0.1264	0.34852	0.81602	0.98836	0.72745	0.99996	-0.086696	-0.2835	0.68629	0.97609	0.7768	0.92137	0.1882	0.51741	0.85481	0.99092	0.60487	0.84864
B230217C12Rik	4	0.591435	-0.73411	0.109407	0.60028	1.8617	0.093386	0.72016	0.062638	0.88163	0.0088453	0.034762	0.7475	0.98142	0.97227	0.99579	-0.44771	-1.3898	0.13716	0.81732	0.16459	0.99998	0.2864	1.1481	0.4648	0.93574	0.25091	0.99996	0.10495	0.32291	0.9755	0.99923	0.74676	0.90845	-0.0044569	-0.017652	0.81221	0.98276	0.98592	0.99557
B230219D22Rik	4	-0.042825	0.13216	-0.1129	0.083515	0.18401	0.99832	0.99929	0.85401	0.98175	0.12634	0.28932	0.99731	0.9998	0.77233	0.9834	-0.76718	-1.7208	0.02191	0.56177	0.085285	0.99998	-0.89934	-2.0939	0.023944	0.53041	0.036267	0.96469	-0.46339	-0.99868	0.23776	0.86554	0.31795	0.66592	-0.35049	-0.79928	0.35936	0.91111	0.42413	0.75775
B2m	4	0.162451	-0.9058	-0.05046	-0.038009	-0.1298	0.71257	0.96877	0.89673	0.98558	-0.20046	-0.68676	0.37177	0.92863	0.49223	0.95614	-0.62893	-2.1521	0.047278	0.68433	0.031388	0.99998	0.27687	0.96193	0.48335	0.93879	0.33608	0.99996	0.26634	0.91269	0.66499	0.97332	0.36141	0.69782	0.3168	1.096	0.63418	0.96839	0.2731	0.65765
B3galnt1	4	0.12459	0.0938131	0.125049	0.41411	1.1895	0.2919	0.87209	0.23423	0.89431	0.28952	0.82124	0.63535	0.96624	0.41151	0.95614	0.087501	0.25272	0.61451	0.97258	0.80048	0.99998	-0.0063121	-0.018075	0.87327	0.9941	0.98558	0.99996	0.074306	0.21285	0.96853	0.99906	0.83145	0.94446	-0.050743	-0.14432	0.73997	0.97483	0.88525	0.96154
B3galnt2	4	-0.34516	-0.411217	-0.21937	-0.21285	-0.77828	0.38641	0.90274	0.4364	0.92906	0.13231	0.49403	0.98434	0.99923	0.62128	0.96399	-0.46947	-1.7403	0.12053	0.80237	0.081801	0.99998	-0.058253	-0.22139	0.75426	0.98009	0.82479	0.99996	0.17546	0.64858	0.83351	0.99076	0.51661	0.79754	0.39483	1.4927	0.5048	0.94671	0.13551	0.51673
B3galt4	4	0.54232	-0.424	-0.37874	0.18157	0.52129	0.76061	0.97512	0.60217	0.94723	-0.36075	-0.83914	0.19003	0.8519	0.40139	0.95614	-0.22678	-0.65237	0.45778	0.9464	0.51416	0.99998	0.19722	0.46096	0.6537	0.96417	0.64483	0.99996	0.55248	1.5901	0.23497	0.86296	0.11181	0.48	0.93122	2.1767	0.037161	0.60049	0.029504	0.33743
B3galt6	4	-0.7707	0.20131	0.43456	-0.87823	-2.3279	0.014743	0.45719	0.019916	0.81254	-0.10753	-0.36851	0.52209	0.96296	0.71249	0.97813	-0.4282	-1.1418	0.15429	0.83034	0.25354	0.99998	-0.62951	-2.1638	0.084388	0.7316	0.030483	0.9571	0.91648	2.4493	0.025316	0.51527	0.014313	0.2715	0.48192	1.6572	0.37649	0.915	0.097471	0.46324
B3gat2	4	-0.9896	-0.60193	-0.49298	-0.61332	-2.3352	0.061359	0.6621	0.019534	0.81066	0.37628	1.287	0.46932	0.95207	0.19808	0.95279	-0.41196	-1.5908	0.1701	0.8362	0.11166	0.99998	0.18997	0.6524	0.66982	0.96875	0.51414	0.99996	-0.606	-2.3096	0.15363	0.8073	0.020911	0.30774	-0.11302	-0.38715	0.6444	0.96839	0.69865	0.8929
B3gat3	4	0.02032	0.39706	0.14438	0.14338	0.47906	0.84983	0.98765	0.63189	0.95281	0.12306	0.44664	0.99553	0.9998	0.65514	0.96604	0.16899	0.57003	0.39251	0.92428	0.56866	0.99998	-0.22807	-0.84155	0.43953	0.93406	0.40004	0.99996	0.62334	2.0965	0.16395	0.81584	0.036036	0.36266	0.47896	1.7619	0.38056	0.91639	0.078087	0.43646
B3glct	4	0.52002	0.21622	0.510957	0.86766	1.9553	0.011845	0.42831	0.050546	0.88163	0.34764	0.81618	0.52102	0.96296	0.4144	0.95614	-0.12697	-0.28591	0.71882	0.97931	0.77495	0.99998	-0.34319	-0.81352	0.28326	0.88401	0.41592	0.99996	0.0027373	0.0061233	0.84165	0.99257	0.99511	0.99841	-0.50822	-1.1869	0.23654	0.85999	0.23527	0.61825
B3gnt2	4	-0.235336	0.674249	0.68043	-0.22627	-0.49616	0.36668	0.89567	0.61978	0.9502	0.0090663	0.016329	0.7479	0.98142	0.98697	0.998	0.063619	0.14353	0.68629	0.97931	0.88587	0.99998	-0.61063	-1.1135	0.091912	0.73537	0.2655	0.99996	0.50351	1.1249	0.28865	0.88205	0.26064	0.6221	-0.17692	-0.32012	0.55513	0.95417	0.74887	0.91492
B3gnt3	4	-0.327639	0.122029	-0.58684	0.032351	0.090961	0.88175	0.99131	0.92752	0.99106	0.35999	0.92736	0.49784	0.95989	0.35374	0.9542	0.18891	0.53692	0.34909	0.91393	0.59132	0.99998	0.066881	0.1738	0.95567	0.99656	0.86202	0.99996	-0.35369	-0.9903	0.33425	0.89178	0.32203	0.66821	0.23315	0.60336	0.77586	0.97778	0.54627	0.82298
B3gnt7	4	-0.72263	0.313464	-0.20751	-0.37685	-1.3336	0.1887	0.81402	0.18233	0.89313	0.34578	0.96373	0.52565	0.96296	0.33518	0.95279	0.33502	1.1978	0.1218	0.80511	0.23101	0.99998	0.021556	0.060326	0.93859	0.9952	0.9519	0.99996	0.15656	0.55664	0.8726	0.99535	0.57778	0.83076	0.36407	1.018	0.55473	0.95417	0.30868	0.68159
B3gnt8	4	-1.0926	-0.4239	0.110845	-0.10923	-0.34959	0.56596	0.94854	0.72664	0.96613	0.98337	1.5615	0.01032	0.41434	0.1184	0.95279	0.34128	1.1494	0.11677	0.80068	0.2504	0.99998	0.76518	1.2271	0.02247	0.52426	0.21979	0.99996	0.12291	0.40094	0.9393	0.99807	0.68846	0.8859	0.012065	0.019025	0.8417	0.98913	0.98482	0.99534
B3gnt9	4	-0.33274	0.15321	0.22005	-0.14629	-0.55543	0.49545	0.92931	0.5786	0.94509	0.18645	0.61838	0.85913	0.98887	0.53633	0.95614	-0.18577	-0.71564	0.55381	0.96474	0.47421	0.99998	-0.33898	-1.1349	0.28799	0.88892	0.2564	0.99996	0.3721	1.4287	0.48416	0.94722	0.1531	0.52715	0.15205	0.50718	0.91729	0.9929	0.61203	0.85123
B3gntl1	4	0.12963	0.20929	0.09524	-0.21974	-0.81016	0.37558	0.89967	0.41785	0.92688	-0.34937	-0.95233	0.20187	0.86609	0.34093	0.95301	-0.19635	-0.73448	0.52809	0.96114	0.46266	0.99998	-0.40564	-1.1268	0.22226	0.85623	0.25983	0.99996	-0.32764	-1.2097	0.36155	0.90542	0.22638	0.59454	-0.42288	-1.1613	0.29709	0.88774	0.2455	0.62922
B430306N03Rik	4	-0.63149	0.01524	0.06001	-0.26004	-0.75101	0.31788	0.88145	0.45265	0.93444	0.37145	0.80234	0.47689	0.95306	0.42236	0.95614	0.457	1.3373	0.038686	0.65381	0.18114	0.99998	0.44176	0.97713	0.21916	0.85553	0.3285	0.99996	0.7336	2.1389	0.087235	0.70982	0.032446	0.35242	0.67359	1.4751	0.16918	0.82322	0.14018	0.52273
B4galnt1	4	-0.776221	-0.88631	-0.0199	0.011049	0.018123	0.82848	0.98365	0.98554	0.99848	0.78727	1.2488	0.049413	0.67616	0.21173	0.95279	-0.50201	-0.8249	0.099842	0.79183	0.40943	0.99998	0.3843	0.61485	0.30009	0.89357	0.53865	0.99996	1.1577	1.9156	0.0036094	0.26087	0.05541	0.40267	1.1776	1.8828	0.0046769	0.30363	0.05973	0.4091
B4galt1	4	1.30632	0.885484	0.772624	0.74788	1.8086	0.031823	0.57233	0.070514	0.88163	-0.55844	-1.6487	0.073611	0.71513	0.099199	0.95279	0.79741	1.9416	0.00076254	0.14423	0.05218	0.99998	-0.088074	-0.26345	0.6901	0.97288	0.79221	0.99996	0.060004	0.14411	0.94118	0.99807	0.88541	0.96381	-0.71262	-2.1162	0.13304	0.79495	0.034331	0.35376
B4galt3	4	-0.29359	0.63173	0.52444	0.29041	0.47735	0.51675	0.93534	0.63311	0.95305	0.584	1.0312	0.17742	0.83894	0.30244	0.95279	0.11743	0.1955	0.53078	0.96151	0.845	0.99998	-0.5143	-0.91302	0.14193	0.80075	0.36123	0.99996	0.73275	1.2159	0.08754	0.70982	0.22401	0.59258	0.20831	0.36848	0.81892	0.98322	0.71251	0.89868
B4galt4	4	0.368839	8e-05	-0.07551	-0.004181	-0.0090521	0.79101	0.97808	0.99278	0.99936	-0.37302	-1.2561	0.17905	0.83949	0.20906	0.95279	-0.31148	-0.6742	0.29409	0.8978	0.50018	0.99998	-0.31156	-1.0678	0.32042	0.90294	0.28559	0.99996	0.57703	1.2503	0.2097	0.84976	0.21119	0.58219	0.65254	2.2372	0.18642	0.83702	0.025271	0.3239
B4galt5	4	0.00364	-0.79415	1.19306	0.029359	0.065193	0.87565	0.99058	0.94802	0.99308	0.025719	0.05188	0.7842	0.98142	0.95862	0.99489	-1.4796	-3.2063	0.00035585	0.10294	0.0013444	0.97602	-0.68545	-1.419	0.064562	0.6835	0.1559	0.99996	-0.98984	-2.0792	0.044482	0.60942	0.037596	0.36526	-2.1829	-4.0364	0.0020843	0.21538	5.4287e-05	0.0084085
B4galt6	4	0.12386	-0.4047	-0.14392	0.44252	1.5014	0.24879	0.84768	0.13326	0.88273	0.31866	0.77464	0.57897	0.96574	0.43855	0.95614	0.1698	0.57714	0.39103	0.92428	0.56385	0.99998	0.5745	1.4011	0.095725	0.73565	0.16118	0.99996	-0.34257	-1.1563	0.34645	0.89801	0.24754	0.6128	-0.19865	-0.48376	0.52809	0.94979	0.62856	0.8587
B4galt7	4	0.41516	0.049439	-0.39927	-0.11323	-0.38269	0.55823	0.94591	0.70195	0.96254	-0.52839	-1.2292	0.084287	0.73233	0.21901	0.95279	0.11054	0.37772	0.54979	0.96474	0.70564	0.99998	0.061101	0.14447	0.96909	0.99729	0.88513	0.99996	0.30816	1.0483	0.5895	0.96428	0.2945	0.64949	0.70743	1.6712	0.1427	0.79847	0.094674	0.45943
B4gat1	4	-0.39811	0.4528	0.29687	-0.0066498	-0.014661	0.78542	0.9778	0.9883	0.99876	0.39146	0.87673	0.4435	0.94508	0.38063	0.95614	-0.39962	-0.90356	0.18255	0.83746	0.36623	0.99998	-0.85242	-1.9138	0.030146	0.57295	0.055642	0.99996	0.19039	0.42621	0.80647	0.99003	0.66996	0.87869	-0.10648	-0.23833	0.65452	0.96839	0.81162	0.93734
B9d1	4	0.34165	-0.336855	-0.1652	0.6133	1.8133	0.085608	0.7156	0.069787	0.88163	0.27165	0.79156	0.67404	0.97002	0.42862	0.95614	-0.27166	-0.80645	0.36368	0.91451	0.41998	0.99998	0.065195	0.19353	0.95959	0.99668	0.84655	0.99996	-0.7653	-2.1938	0.093945	0.71906	0.028252	0.33871	-0.6001	-1.7328	0.18398	0.83541	0.083126	0.44342
B9d2	4	0.111796	-0.343367	0.409183	0.084917	0.29161	0.99517	0.99913	0.77058	0.97371	-0.026879	-0.059593	0.67409	0.97002	0.95248	0.99419	-0.27694	-0.96596	0.35428	0.91419	0.33407	0.99998	0.066427	0.15078	0.95684	0.99656	0.88015	0.99996	-0.044907	-0.15453	0.75761	0.98794	0.87719	0.96011	-0.45409	-1.0075	0.27253	0.8772	0.31368	0.6853
Baat	4	0.43522	-0.199903	0.23118	0.27946	0.69916	0.54136	0.94114	0.48445	0.93596	-0.15576	-0.3411	0.44222	0.94508	0.73303	0.98155	-0.019343	-0.049645	0.94413	0.99726	0.96041	0.99998	0.18056	0.4192	0.6901	0.97288	0.67507	0.99996	-0.60392	-1.4534	0.15449	0.8073	0.14611	0.51834	-0.8351	-1.793	0.091099	0.72142	0.072976	0.43219
Babam1	4	0.33033	0.352295	0.26389	0.45326	1.2886	0.23552	0.84191	0.19754	0.89431	0.12293	0.42085	0.99492	0.9998	0.67386	0.97077	0.33306	0.9486	0.12363	0.80952	0.34282	0.99998	-0.019235	-0.066139	0.84236	0.99121	0.94727	0.99996	-0.42403	-1.1995	0.26897	0.87442	0.23034	0.59792	-0.68792	-2.3573	0.14265	0.79847	0.018411	0.29232
Babam2	4	0.650909	0.04475	0.01753	0.61491	1.7734	0.084592	0.71447	0.076167	0.88163	-0.035999	-0.091429	0.65645	0.96966	0.92715	0.99289	0.30404	0.88805	0.15398	0.83034	0.37451	0.99998	0.25929	0.67961	0.5197	0.94594	0.49675	0.99996	0.54229	1.5672	0.24605	0.86578	0.11706	0.48667	0.52476	1.36	0.32342	0.90069	0.17382	0.55952
Bace1	4	0.029464	0.194695	0.0460598	0.019385	0.065906	0.84922	0.98747	0.94745	0.99308	-0.010079	-0.033888	0.70718	0.97499	0.97297	0.99579	0.11083	0.38122	0.54898	0.96474	0.70304	0.99998	-0.083865	-0.28639	0.69951	0.97395	0.77458	0.99996	0.0027778	0.0094636	0.84165	0.99257	0.99245	0.99718	-0.043282	-0.14656	0.75217	0.9757	0.88348	0.96101
Bace2	4	-0.020418	0.06672	0.05131	-0.06876	-0.18666	0.64643	0.95912	0.85192	0.98175	-0.048342	-0.13321	0.63169	0.96624	0.89403	0.99163	-0.51988	-1.4458	0.090387	0.78223	0.14824	0.99998	-0.5866	-1.6492	0.10183	0.75056	0.099108	0.99996	-0.61091	-1.6334	0.15119	0.80437	0.10238	0.46666	-0.66222	-1.812	0.15439	0.81116	0.069993	0.42667
Bach1	4	0.53227	-0.15181	-0.27864	0.69588	1.3039	0.046973	0.61508	0.19226	0.89431	0.16361	0.27815	0.91241	0.99227	0.7809	0.98441	-0.49988	-0.93206	0.10152	0.79372	0.35131	0.99998	-0.34807	-0.60123	0.27782	0.88046	0.54769	0.99996	0.1518	0.28242	0.88175	0.99535	0.77762	0.92165	0.43044	0.74197	0.44817	0.93206	0.4581	0.77571
Bach2	4	0.00748	-0.279345	0.24828	0.30027	0.54783	0.49494	0.92929	0.58381	0.94556	0.29279	0.57642	0.62864	0.96624	0.56433	0.95746	-0.18269	-0.33439	0.56164	0.96565	0.73809	0.99998	0.096655	0.1921	0.88557	0.99482	0.84766	0.99996	1.1924	2.1951	0.0025418	0.21834	0.028155	0.33833	0.94412	1.8753	0.033298	0.58956	0.060749	0.41136
Bad	4	0.543839	-0.292045	-0.27624	0.036409	0.10399	0.89126	0.99253	0.91718	0.98892	-0.50743	-0.91365	0.0942	0.74899	0.3609	0.9542	-0.067555	-0.19464	0.90082	0.99294	0.84567	0.99998	0.22449	0.42508	0.59163	0.95605	0.67078	0.99996	0.46376	1.3317	0.34213	0.89557	0.18297	0.55759	0.74	1.3879	0.12013	0.76986	0.16518	0.55025
Bag1	4	0.05573	-0.53664	0.31614	-0.47148	-1.824	0.12099	0.75843	0.068155	0.88163	-0.52721	-1.4761	0.084693	0.73327	0.13992	0.95279	0.12501	0.5065	0.50902	0.95794	0.61251	0.99998	0.66165	1.8858	0.054141	0.6504	0.059325	0.99996	0.16017	0.63747	0.86533	0.99439	0.52382	0.80125	-0.15597	-0.44114	0.58116	0.9582	0.65911	0.87469
Bag2	4	-0.41698	-0.256186	-0.010542	-0.20433	-0.86867	0.40049	0.90625	0.38503	0.91722	0.21265	0.60311	0.7996	0.98412	0.54644	0.95697	0.021564	0.091907	0.81216	0.98285	0.92677	0.99998	0.27775	0.79346	0.48208	0.93879	0.42751	0.99996	-0.043195	-0.18361	0.76076	0.98815	0.85432	0.9523	-0.032653	-0.092872	0.76864	0.97757	0.926	0.97518
Bag3	4	-0.20287	-0.0667	-0.267458	-0.52653	-1.5431	0.094454	0.72071	0.1228	0.88163	-0.32366	-0.97973	0.22653	0.8829	0.32722	0.95279	0.14654	0.43396	0.45122	0.94572	0.66432	0.99998	0.21324	0.6506	0.6169	0.96044	0.51531	0.99996	0.022052	0.064927	0.87642	0.99535	0.94823	0.98489	0.28951	0.88201	0.67917	0.96975	0.37777	0.72983
Bag4	4	0.607	0.502347	-0.207693	0.24499	0.68551	0.6168	0.95506	0.49302	0.93596	-0.36201	-1.2243	0.18876	0.85055	0.22085	0.95279	0.59384	1.6965	0.0085913	0.41626	0.089794	0.99998	0.091493	0.31659	0.89655	0.99511	0.75155	0.99996	-0.056043	-0.15634	0.73845	0.98501	0.87576	0.96003	0.15165	0.52087	0.91805	0.99298	0.60246	0.84795
Bag5	4	0.158587	0.009304	-0.15252	-0.012153	-0.037958	0.77256	0.97617	0.96972	0.99617	-0.17074	-0.50904	0.41752	0.93813	0.61072	0.96214	-0.03085	-0.097094	0.98124	0.9998	0.92265	0.99998	-0.040154	-0.12045	0.79518	0.98669	0.90413	0.99996	0.35942	1.1274	0.50465	0.95035	0.25957	0.6212	0.51194	1.5351	0.34009	0.90809	0.12475	0.50192
Bag6	4	-0.19926	-1.05468	-0.52353	0.20391	0.57875	0.7083	0.96877	0.56276	0.94401	0.40317	0.89357	0.42143	0.93899	0.37155	0.9542	-0.58667	-1.6692	0.060648	0.72259	0.095074	0.99998	0.46801	1.0412	0.19023	0.83116	0.29779	0.99996	0.36637	1.044	0.49311	0.94765	0.2965	0.65087	0.8899	1.9788	0.048244	0.62783	0.047834	0.39059
Bahd1	4	0.048869	-0.08615	0.18324	0.078006	0.24935	0.98882	0.99785	0.80309	0.97673	0.029137	0.12863	0.79172	0.9829	0.89765	0.99163	-0.48331	-1.5511	0.11209	0.80068	0.12088	0.99998	-0.39716	-1.7669	0.22953	0.85682	0.077252	0.99996	0.39832	1.2794	0.43912	0.93151	0.20077	0.57428	0.21508	0.95539	0.80677	0.9826	0.33938	0.7034
Baiap2	4	-0.343181	-0.345777	-0.24309	-0.075471	-0.25979	0.63474	0.95867	0.79502	0.9756	0.26771	0.86957	0.68329	0.97286	0.38454	0.95614	-0.010877	-0.037823	0.91632	0.99297	0.96983	0.99998	0.3349	1.0928	0.37782	0.91639	0.2745	0.99996	0.2349	0.81216	0.72208	0.98157	0.4167	0.73567	0.47799	1.5583	0.38244	0.91775	0.11917	0.49363
Baiap2l1	4	-0.419789	-0.27281	-0.36276	-0.39498	-1.2664	0.1733	0.80118	0.20536	0.89431	0.024809	0.071834	0.78252	0.98142	0.94273	0.99372	-0.24954	-0.8036	0.40766	0.92706	0.42163	0.99998	0.02327	0.068016	0.94296	0.99592	0.94577	0.99996	0.10709	0.34422	0.97133	0.99906	0.73068	0.9008	0.46985	1.3709	0.39424	0.92223	0.1704	0.5557
Bak1	4	-0.27295	-0.34838	-0.00309	-0.46286	-1.1144	0.12633	0.76456	0.26511	0.89431	-0.18991	-0.51022	0.38717	0.93107	0.6099	0.96214	0.19426	0.46835	0.33796	0.91261	0.63954	0.99998	0.54264	1.4829	0.11972	0.77607	0.13809	0.99996	0.84845	2.0466	0.041025	0.59078	0.040696	0.36889	0.85154	2.3217	0.062935	0.67167	0.020249	0.30314
Bambi	4	-0.12894	0.58905	-0.279153	0.11268	0.38297	0.9243	0.99682	0.70174	0.96254	0.24162	0.81642	0.73824	0.98142	0.41426	0.95614	0.20587	0.7018	0.31539	0.90609	0.4828	0.99998	-0.38318	-1.3016	0.2431	0.86617	0.19304	0.99996	-0.047063	-0.15973	0.75441	0.9876	0.8731	0.9591	0.23209	0.78753	0.77815	0.9781	0.43097	0.76122
Banf1	4	-0.1067	-0.47462	-0.57051	-0.54838	-0.9886	0.086015	0.7156	0.32286	0.91079	-0.44168	-0.85281	0.12902	0.79906	0.39376	0.95614	-0.62082	-1.1231	0.049464	0.68613	0.26139	0.99998	-0.1462	-0.28682	0.57872	0.95311	0.77425	0.99996	0.30893	0.56127	0.58802	0.96427	0.57461	0.82905	0.87944	1.7281	0.051751	0.63864	0.083967	0.44513
Bank1	4	-0.25768	0.15303	0.507473	0.50917	2.023	0.1705	0.79952	0.04307	0.88163	0.76685	1.9548	0.056784	0.68383	0.050606	0.95279	-0.24806	-0.99095	0.41045	0.92778	0.32171	0.99998	-0.40109	-1.0247	0.22612	0.85682	0.30549	0.99996	0.096903	0.38312	0.99095	0.99949	0.70163	0.89083	-0.41057	-1.0385	0.30685	0.89474	0.29904	0.67522
Bap1	4	0.62103	-0.64729	0.78103	-0.08423	-0.11215	0.61583	0.95506	0.91071	0.98844	-0.70526	-0.80555	0.033145	0.61801	0.4205	0.95614	-1.0128	-1.3533	0.0047786	0.32526	0.17597	0.99998	-0.36551	-0.44076	0.26125	0.87525	0.65938	0.99996	0.9823	1.3747	0.014641	0.42878	0.16922	0.54346	0.20127	0.23935	0.83173	0.98632	0.81084	0.93702
Bard1	4	0.0271459	-0.22745	0.55274	0.034698	0.12137	0.88714	0.99204	0.90339	0.98695	0.0075521	0.019224	0.74419	0.98142	0.98466	0.99788	0.26543	0.93552	0.20477	0.85123	0.34952	0.99998	0.49288	1.2927	0.16344	0.81454	0.19612	0.99996	-0.11366	-0.39686	0.64491	0.97256	0.69147	0.887	-0.6664	-1.6934	0.15236	0.8095	0.090372	0.45355
Basp1	4	-0.26676	-0.336819	0.524989	-0.48968	-1.6569	0.11133	0.75077	0.097544	0.88163	-0.22292	-0.53894	0.34015	0.92106	0.58993	0.95978	-0.069449	-0.24091	0.89482	0.99195	0.80963	0.99998	0.26737	0.66762	0.50384	0.94185	0.50438	0.99996	-0.005651	-0.019317	0.82695	0.99003	0.98459	0.99455	-0.53064	-1.2879	0.22231	0.85395	0.1978	0.58448
Batf2	4	-1.19844	0.66787	-0.49638	-0.53817	-1.7971	0.090133	0.71804	0.072319	0.88163	0.66027	1.4543	0.11438	0.7756	0.14585	0.95279	0.55724	1.8931	0.013065	0.48582	0.058349	0.99998	-0.11063	-0.24517	0.64445	0.96278	0.80632	0.99996	-0.63488	-2.1178	0.13924	0.7894	0.034193	0.3564	-0.1385	-0.30405	0.60612	0.96083	0.76109	0.91786
Batf3	4	0.227322	-0.53399	-0.13664	0.31329	1.2079	0.46652	0.92154	0.22708	0.89431	0.085968	0.30259	0.91378	0.99227	0.7622	0.98251	-0.16347	-0.63052	0.61441	0.97258	0.52836	0.99998	0.37052	1.3209	0.32123	0.90294	0.18653	0.99996	0.46231	1.7831	0.34426	0.8965	0.074574	0.4354	0.59895	2.1291	0.23868	0.86178	0.03325	0.35063
Bax	4	0.16617	-0.1055	0.13127	0.63154	2.06	0.075288	0.69504	0.039399	0.88163	0.46537	1.3359	0.32266	0.9181	0.18158	0.95279	0.38655	1.2696	0.076559	0.76215	0.20421	0.99998	0.49205	1.4302	0.16425	0.81513	0.15266	0.99996	0.60158	1.9654	0.18413	0.82912	0.049371	0.38925	0.47031	1.3579	0.39352	0.92223	0.1745	0.56003
Baz1a	4	-0.98905	0.54403	1.07233	-0.1954	-0.61207	0.41457	0.91151	0.54049	0.93947	0.79365	1.6915	0.046871	0.66046	0.090733	0.95279	0.20969	0.66752	0.3069	0.90145	0.50444	0.99998	-0.33434	-0.71411	0.29343	0.89118	0.47516	0.99996	0.16881	0.53218	0.84719	0.99267	0.5946	0.84086	-0.90352	-1.9148	0.074628	0.69508	0.055521	0.40153
Baz1b	4	1.14268	-0.125702	0.2073	0.99183	1.6268	0.0038127	0.26224	0.10378	0.88163	-0.15085	-0.31198	0.44944	0.94533	0.75506	0.98236	0.055038	0.090558	0.7115	0.97931	0.92784	0.99998	0.18074	0.39161	0.68995	0.97288	0.69535	0.99996	-0.18129	-0.28972	0.5439	0.95551	0.77203	0.91971	-0.38859	-0.80919	0.32591	0.90164	0.41841	0.75448
Baz2a	4	0.288917	-0.2313	-0.20242	0.24444	0.7605	0.61842	0.95594	0.44696	0.93345	-0.044477	-0.12468	0.63911	0.96674	0.90078	0.99163	-0.47478	-1.4836	0.11718	0.80068	0.13791	0.99998	-0.24348	-0.70499	0.41355	0.92633	0.48082	0.99996	0.45533	1.4242	0.35443	0.90204	0.15439	0.52798	0.65775	1.9031	0.18194	0.83233	0.057032	0.40377
Baz2b	4	-0.123381	0.01128	0.49007	-0.021961	-0.065523	0.74999	0.97463	0.94776	0.99308	0.10142	0.31967	0.94744	0.9935	0.74922	0.98236	-0.1572	-0.47515	0.63118	0.97283	0.63468	0.99998	-0.16848	-0.53878	0.53912	0.94934	0.59004	0.99996	0.32951	0.99109	0.55295	0.95892	0.32164	0.66761	-0.16056	-0.50841	0.57587	0.95808	0.61116	0.85107
Bbc3	4	0.38997	-0.95967	0.04212	0.14997	0.36003	0.83387	0.9844	0.71882	0.96512	-0.24	-0.4873	0.31935	0.9181	0.62605	0.96463	-0.26346	-0.64494	0.38051	0.92025	0.51897	0.99998	0.69621	1.4993	0.041279	0.6171	0.13379	0.99996	0.5182	1.2653	0.27136	0.87609	0.20577	0.57767	0.47608	1.0094	0.38483	0.91785	0.31278	0.68494
Bbip1	4	-0.1133	-0.300879	0.01795	0.25298	0.62828	0.59936	0.95336	0.52982	0.93854	0.36628	0.9302	0.48645	0.956	0.35227	0.9542	-0.24814	-0.6224	0.41035	0.92778	0.53368	0.99998	0.052739	0.13511	0.98866	0.99821	0.89252	0.99996	0.71394	1.7935	0.097809	0.72498	0.072892	0.4326	0.69599	1.7806	0.15088	0.8095	0.074976	0.43429
Bbof1	4	-0.47351	0.16945	-0.20587	0.42139	1.0582	0.27909	0.8649	0.28995	0.89746	0.8949	2.0856	0.02247	0.54423	0.037016	0.95279	-0.12226	-0.31112	0.73209	0.9798	0.75571	0.99998	-0.29171	-0.68261	0.34696	0.90873	0.49485	0.99996	-0.28086	-0.69544	0.41391	0.92393	0.48678	0.78108	-0.07499	-0.17256	0.70164	0.97169	0.863	0.95431
Bbox1	4	-0.426849	0.35894	-0.14664	-0.0055288	-0.014621	0.78822	0.97795	0.98833	0.99876	0.42132	1.1929	0.3921	0.93233	0.23292	0.95279	-0.37765	-1.0355	0.20589	0.85123	0.30044	0.99998	-0.73659	-2.1039	0.050735	0.64763	0.035385	0.96469	-0.30392	-0.80079	0.38666	0.91106	0.42325	0.74053	-0.15728	-0.44154	0.57958	0.9582	0.65882	0.87469
Bbs1	4	-0.280507	0.08321	0.77589	-0.30625	-1.0196	0.25952	0.85578	0.30793	0.90583	-0.025743	-0.06822	0.67663	0.97118	0.94561	0.99372	0.35339	1.2091	0.10493	0.79869	0.22661	0.99998	0.27018	0.74865	0.49713	0.94019	0.45407	0.99996	-0.12303	-0.41254	0.63022	0.96991	0.67994	0.88298	-0.89892	-2.35	0.075695	0.6966	0.018772	0.29331
Bbs10	4	0.270957	0.073201	-0.33565	0.25718	0.89532	0.59153	0.95242	0.37062	0.91292	-0.013777	-0.039076	0.6993	0.97475	0.96883	0.99569	-0.078659	-0.27378	0.86513	0.98838	0.78426	0.99998	-0.15186	-0.4343	0.5683	0.95257	0.66407	0.99996	-0.17743	-0.61638	0.54898	0.95711	0.53765	0.80969	0.15822	0.45138	0.90641	0.99234	0.65171	0.8718
Bbs12	4	0.23225	0.06683	-0.157953	0.57938	1.7569	0.10747	0.74412	0.078942	0.88163	0.34713	1.0972	0.52255	0.96296	0.27254	0.95279	0.37441	1.1451	0.086015	0.77306	0.25219	0.99998	0.30758	0.98171	0.4255	0.9288	0.32625	0.99996	-0.20959	-0.62884	0.50577	0.95035	0.52946	0.80492	-0.051637	-0.16351	0.73896	0.97483	0.87012	0.95652
Bbs2	4	-0.598466	-1.23276	0.21354	0.094394	0.28242	0.97092	0.99703	0.77762	0.97379	0.69286	1.272	0.092369	0.74888	0.20336	0.95279	-0.40997	-1.2383	0.17203	0.8362	0.2156	0.99998	0.82279	1.5397	0.013624	0.44667	0.12364	0.99996	-0.10992	-0.32842	0.6505	0.97332	0.74259	0.90668	-0.32346	-0.58985	0.38625	0.91852	0.55529	0.82814
Bbs4	4	0.062752	-0.311186	0.755496	-0.067368	-0.20838	0.64969	0.95912	0.83493	0.9808	-0.13012	-0.52633	0.48416	0.95584	0.59866	0.96054	-0.025406	-0.079258	0.96386	0.99853	0.93683	0.99998	0.28578	1.1787	0.46642	0.93643	0.23851	0.99996	0.7467	2.329	0.080931	0.70524	0.01986	0.30259	-0.0087957	-0.035901	0.80555	0.98247	0.97136	0.98957
Bbs5	4	-0.13952	-0.515986	-0.228457	0.66768	1.5053	0.057648	0.64729	0.13225	0.88273	0.8072	1.1718	0.042855	0.65477	0.24129	0.95279	0.037534	0.084733	0.76305	0.98162	0.93247	0.99998	0.55352	0.8089	0.11194	0.77293	0.41857	0.99996	0.088743	0.19903	0.99441	0.99964	0.84224	0.94844	0.3172	0.46116	0.63362	0.96839	0.64469	0.86843
Bbs7	4	-0.42548	0.128909	0.183653	-0.15137	-0.57315	0.48645	0.92778	0.56654	0.94463	0.27411	0.76314	0.6689	0.97002	0.44538	0.95614	0.099322	0.38124	0.5804	0.96717	0.70302	0.99998	-0.029587	-0.083355	0.81801	0.98846	0.93357	0.99996	0.10749	0.40942	0.97026	0.99906	0.68223	0.88408	-0.076163	-0.21251	0.70002	0.97169	0.83171	0.9454
Bbs9	4	0.22564	0.03696	-0.78371	-0.13253	-0.50984	0.52199	0.93729	0.61017	0.94855	-0.35817	-1.0707	0.19236	0.85575	0.28431	0.95279	-0.58627	-2.2593	0.060902	0.72299	0.023866	0.99998	-0.62323	-1.8706	0.086625	0.73537	0.061407	0.99996	-0.40428	-1.5522	0.28585	0.87957	0.12061	0.4924	0.37943	1.1392	0.53063	0.94979	0.2546	0.63762
Bbx	4	-0.01996	-0.385766	-0.23281	0.14076	0.50462	0.85588	0.98803	0.61383	0.94915	0.16072	0.6543	0.91922	0.99251	0.51292	0.95614	-0.48207	-1.7286	0.11306	0.80068	0.083881	0.99998	-0.096304	-0.39342	0.67145	0.96927	0.69401	0.99996	-0.42931	-1.5339	0.26481	0.87176	0.12506	0.49877	-0.1965	-0.80144	0.53124	0.94979	0.42288	0.75707
BC003965	4	-0.06836	0.467272	-0.25324	-0.21415	-0.71402	0.38437	0.90208	0.47521	0.93596	-0.14579	-0.35509	0.45783	0.9473	0.72252	0.97971	0.074082	0.25497	0.65508	0.97701	0.79875	0.99998	-0.39319	-0.98874	0.23293	0.85778	0.32279	0.99996	-1.0129	-3.3179	0.041025	0.59078	0.00090682	0.052775	-0.75966	-1.8404	0.11474	0.76327	0.065709	0.42076
BC004004	4	-0.26386	-0.313961	-0.557669	-0.47455	-1.2447	0.11906	0.7567	0.21324	0.89431	-0.21069	-0.64423	0.35682	0.92404	0.51942	0.95614	-0.016911	-0.045965	0.93625	0.9959	0.96334	0.99998	0.29705	0.94236	0.44477	0.93406	0.34601	0.99996	-0.086949	-0.23113	0.68614	0.97609	0.81722	0.93924	0.47072	1.4754	0.39286	0.92195	0.14011	0.52273
BC005537	4	0.89644	-0.16757	-0.65355	0.61341	1.3198	0.085557	0.7156	0.18691	0.89431	-0.28303	-0.6164	0.2676	0.89851	0.53763	0.95614	0.40846	0.88607	0.062884	0.73341	0.37558	0.99998	0.57603	1.2784	0.095013	0.73537	0.20111	0.99996	-1.6195	-3.4736	0.0057953	0.32948	0.00051361	0.036321	-0.96595	-2.1119	0.060902	0.66556	0.034697	0.3553
BC005624	4	-0.36019	-0.02042	0.3003	-0.17075	-0.34529	0.45376	0.91967	0.72988	0.96712	0.18944	0.44539	0.85252	0.98887	0.65604	0.96604	0.12023	0.24812	0.52311	0.95917	0.80404	0.99998	0.14065	0.33217	0.78135	0.98381	0.73976	0.99996	0.56747	1.164	0.22022	0.85663	0.24443	0.61122	0.26717	0.6306	0.71801	0.9736	0.5283	0.81297
BC024978	4	-0.07384	-0.07064	0.369155	-0.018834	-0.066994	0.7568	0.97512	0.94659	0.99308	0.055006	0.12104	0.84708	0.98808	0.90366	0.99196	-0.34184	-1.229	0.24895	0.8746	0.21906	0.99998	-0.2712	-0.60618	0.37426	0.91581	0.5444	0.99996	0.044455	0.15884	0.91515	0.99678	0.8738	0.95934	-0.3247	-0.71549	0.38498	0.91785	0.47431	0.7855
BC028528	4	-0.64002	0.264127	0.13729	-0.16896	-0.56906	0.45666	0.91967	0.56932	0.94467	0.47106	1.389	0.31351	0.91551	0.16484	0.95279	0.20474	0.7093	0.31752	0.90727	0.47814	0.99998	-0.059387	-0.17803	0.75166	0.98009	0.8587	0.99996	0.49046	1.6816	0.30619	0.89008	0.092655	0.45797	0.35317	1.048	0.57333	0.95783	0.29463	0.67356
BC031181	4	-0.18389	-0.47459	-0.467318	0.35004	1.1481	0.39546	0.90475	0.25094	0.89431	0.53393	1.0635	0.23181	0.88781	0.28754	0.95279	0.36651	1.2177	0.092929	0.78744	0.22335	0.99998	0.8411	1.7211	0.011387	0.41328	0.085234	0.99996	-0.070568	-0.23026	0.71206	0.97978	0.81789	0.93938	0.39675	0.79495	0.50155	0.94614	0.42664	0.75963
BC048403	4	0.169483	0.60748	-0.75847	0.25376	0.71978	0.59824	0.95334	0.47166	0.93596	0.084277	0.25942	0.91032	0.99227	0.79531	0.98631	0.21548	0.62143	0.29541	0.8978	0.53431	0.99998	-0.392	-1.2226	0.23375	0.85853	0.22147	0.99996	-0.4446	-1.2473	0.25271	0.87095	0.2123	0.58368	0.31387	0.97641	0.63891	0.96839	0.32886	0.69441
BC049715	4	0.161857	-0.39213	-0.21121	0.092082	0.35159	0.97656	0.99735	0.72515	0.96561	-0.069775	-0.23985	0.59021	0.96624	0.81045	0.98772	-0.21916	-0.84232	0.47481	0.9535	0.39961	0.99998	0.17297	0.59702	0.70769	0.97474	0.55049	0.99996	0.36814	1.4123	0.49082	0.94722	0.15787	0.5303	0.57935	1.9992	0.25937	0.87502	0.04559	0.38741
BC055324	4	0.159858	0.63492	0.91935	0.074159	0.20534	0.98078	0.99774	0.83731	0.98118	-0.085699	-0.21501	0.56199	0.96574	0.82976	0.98896	0.17433	0.48156	0.38092	0.92025	0.63012	0.99998	-0.46059	-1.1681	0.17833	0.82727	0.24277	0.99996	0.3688	1.0192	0.48965	0.94722	0.30813	0.65747	-0.55055	-1.386	0.21056	0.84714	0.16576	0.55049
Bcan	4	-0.403784	-0.01681	0.06325	0.094556	0.27396	0.97051	0.99703	0.78412	0.9748	0.49834	1.1668	0.27599	0.90154	0.2433	0.95279	-0.10413	-0.30463	0.78649	0.982	0.76065	0.99998	-0.08732	-0.20806	0.69234	0.97327	0.83518	0.99996	0.22125	0.64319	0.74958	0.98756	0.5201	0.79886	0.158	0.37081	0.90672	0.99234	0.71078	0.89754
Bcap29	4	-0.35079	0.40935	0.249892	0.50477	1.3737	0.17457	0.8014	0.16955	0.89157	0.85556	1.4452	0.030553	0.60281	0.14841	0.95279	0.28243	0.78215	0.18047	0.83746	0.43413	0.99998	-0.12692	-0.21729	0.61486	0.95965	0.82798	0.99996	0.26417	0.71829	0.6688	0.97332	0.47258	0.77438	0.014278	0.023637	0.84525	0.98982	0.98114	0.99409
Bcap31	4	0.376786	-0.53402	-0.25297	-0.062334	-0.2313	0.66016	0.95937	0.81709	0.9781	-0.43912	-1.0733	0.13111	0.80243	0.28312	0.95279	-0.32774	-1.2284	0.26877	0.88382	0.21929	0.99998	0.20628	0.52957	0.63281	0.96183	0.59641	0.99996	-0.12449	-0.46228	0.62879	0.96991	0.64388	0.86715	0.12848	0.32302	0.95704	0.99642	0.74668	0.91405
Bcar1	4	0.28925	0.50678	0.0851	0.14463	0.28048	0.84602	0.98725	0.77911	0.97394	-0.14462	-0.30941	0.4592	0.94775	0.75701	0.98238	-0.17134	-0.33347	0.59234	0.96842	0.73878	0.99998	-0.67812	-1.4637	0.067155	0.69102	0.14327	0.99996	1.181	2.302	0.0029485	0.23868	0.021332	0.3081	1.0959	2.3738	0.010421	0.4334	0.017605	0.29101
Bcar3	4	0.19793	1.20009	-0.276536	-0.22823	-0.74106	0.36353	0.89488	0.45866	0.93596	-0.42616	-1.0209	0.13934	0.81095	0.3073	0.95279	0.094386	0.31486	0.59367	0.96994	0.75287	0.99998	-1.1057	-2.7242	0.0095064	0.38763	0.0064464	0.56393	0.052304	0.17157	0.92761	0.99678	0.86378	0.95573	0.32884	0.82421	0.6139	0.963	0.40982	0.74898
Bcas2	4	-0.274741	0.179899	-0.29932	0.090819	0.2415	0.98033	0.99774	0.80917	0.97722	0.36556	0.70525	0.48737	0.956	0.48066	0.95614	-0.015211	-0.041422	0.93081	0.99533	0.96696	0.99998	-0.19511	-0.38405	0.49169	0.93879	0.70094	0.99996	0.11655	0.31199	0.95171	0.99814	0.75505	0.91194	0.41587	0.81301	0.4713	0.93961	0.41621	0.75279
Bcas3	4	-0.828668	-0.36312	-0.43782	-0.087938	-0.17287	0.60943	0.95433	0.86275	0.98175	0.74073	0.9904	0.067206	0.69815	0.32198	0.95279	-0.12136	-0.24869	0.73448	0.98019	0.8036	0.99998	0.24176	0.32979	0.55544	0.9506	0.74156	0.99996	0.15819	0.3163	0.86966	0.99517	0.75178	0.91041	0.59601	0.80229	0.24162	0.86544	0.42238	0.7565
Bcat1	4	0.358247	-0.05174	1.06682	-0.068083	-0.15796	0.64796	0.95912	0.87449	0.98187	-0.42633	-1.2143	0.13934	0.81095	0.22463	0.95279	0.10815	0.26463	0.55584	0.96474	0.7913	0.99998	0.15989	0.49743	0.73667	0.97852	0.61888	0.99996	0.15394	0.36535	0.87733	0.99535	0.71485	0.8956	-0.91288	-2.5891	0.072645	0.68967	0.0096222	0.21887
Bcat2	4	0.101629	0.3511	-0.22202	0.030715	0.093596	0.87825	0.99082	0.92543	0.99078	-0.070914	-0.20107	0.58792	0.96624	0.84064	0.98896	0.1825	0.58262	0.36333	0.91451	0.56015	0.99998	-0.1686	-0.4919	0.53881	0.94934	0.62279	0.99996	0.39748	1.2441	0.44045	0.93151	0.21347	0.5846	0.6195	1.8037	0.21758	0.8537	0.071273	0.43027
Bccip	4	-0.58065	0.34533	1.35172	-0.26145	-0.60902	0.31539	0.87952	0.54251	0.94065	0.3192	0.57486	0.57806	0.96574	0.56539	0.9576	0.122	0.2873	0.51782	0.95794	0.77389	0.99998	-0.22333	-0.40738	0.44624	0.93406	0.68373	0.99996	-0.16498	-0.38438	0.5681	0.96129	0.7007	0.89027	-1.5167	-2.6955	0.012658	0.48444	0.0070286	0.18337
Bcdin3d	4	-0.47163	-0.194361	-0.06785	-0.24278	-0.65214	0.34152	0.89029	0.51431	0.93634	0.22885	0.50789	0.76549	0.98142	0.61153	0.96217	-0.012431	-0.034553	0.92141	0.99332	0.97244	0.99998	0.18193	0.4202	0.68715	0.97288	0.67434	0.99996	-0.49486	-1.3257	0.21621	0.85551	0.18493	0.5599	-0.42701	-0.94149	0.29333	0.88619	0.34645	0.70873
Bckdha	4	-0.2315	-0.251561	-0.15397	-0.01579	-0.034106	0.76356	0.97515	0.97279	0.99683	0.21571	0.57534	0.79315	0.98299	0.56506	0.95746	-0.0066907	-0.014588	0.9028	0.99294	0.98836	0.99998	0.24487	0.6553	0.54878	0.95001	0.51228	0.99996	0.50455	1.097	0.28733	0.88151	0.27262	0.63136	0.65852	1.7619	0.18118	0.83124	0.078089	0.43646
Bckdk	4	0.383133	-0.27277	0.05299	0.41194	1.2264	0.29531	0.87376	0.22006	0.89431	0.028807	0.080114	0.79091	0.9827	0.93615	0.99328	-0.15382	-0.46155	0.64059	0.97461	0.6444	0.99998	0.11895	0.33919	0.83321	0.98951	0.73446	0.99996	0.28209	0.84096	0.63637	0.97149	0.40037	0.72656	0.2291	0.64606	0.78313	0.97918	0.51824	0.80824
Bcl10	4	-0.00635	-0.35634	0.917979	0.1389	0.31819	0.86071	0.98936	0.75034	0.97016	0.14525	0.32435	0.95384	0.99392	0.74567	0.98236	0.18067	0.41981	0.36694	0.91587	0.67462	0.99998	0.53701	1.2184	0.12394	0.7804	0.22309	0.99996	0.87519	2.0303	0.034162	0.55721	0.042328	0.37303	-0.042789	-0.096023	0.75299	0.9757	0.9235	0.97443
Bcl11a	4	-0.00512	0.12246	0.11845	0.26868	0.69041	0.56504	0.94854	0.48993	0.93596	0.2738	1.0108	0.66972	0.97002	0.31209	0.95279	-0.24344	-0.63617	0.42047	0.93394	0.52467	0.99998	-0.3659	-1.3878	0.26089	0.87523	0.1652	0.99996	0.27534	0.71227	0.64877	0.97332	0.47629	0.77571	0.15689	0.58626	0.90834	0.99234	0.5577	0.82922
Bcl2	4	-0.88473	-0.12526	0.19585	-0.35643	-1.7374	0.20655	0.8218	0.082318	0.88163	0.5283	2.0263	0.23898	0.89175	0.042736	0.95279	-0.23649	-1.1563	0.43587	0.93881	0.24754	0.99998	-0.11123	-0.42788	0.64328	0.96278	0.66874	0.99996	-0.16609	-0.81008	0.56693	0.96129	0.41789	0.73659	-0.36194	-1.3863	0.34843	0.90896	0.16565	0.55049
Bcl2a1a	4	-0.100675	0.388514	0.23495	0.096415	0.28007	0.96558	0.99703	0.77943	0.97394	0.19709	0.49913	0.83585	0.9877	0.61769	0.96311	0.027444	0.080539	0.79305	0.982	0.93581	0.99998	-0.36107	-0.91809	0.26531	0.87525	0.35857	0.99996	0.39006	1.1392	0.4528	0.93769	0.25464	0.61854	0.15511	0.39407	0.91195	0.99244	0.69353	0.89032
Bcl2a1b	4	-0.22443	0.186943	-0.79879	0.27186	0.65076	0.55813	0.94591	0.5152	0.93634	0.49629	1.0309	0.27853	0.90218	0.3026	0.95279	0.22867	0.55325	0.26938	0.88437	0.58009	0.99998	0.041727	0.087203	0.98455	0.99804	0.93051	0.99996	-0.10656	-0.25415	0.65518	0.97332	0.79938	0.93139	0.69223	1.4454	0.15429	0.81116	0.14835	0.53227
Bcl2a1d	4	0.50288	-0.72952	0.2825	0.75952	1.3921	0.028875	0.55906	0.16388	0.88954	0.25664	0.4595	0.70561	0.97475	0.64588	0.96572	0.23715	0.4384	0.25322	0.8759	0.6611	0.99998	0.96667	1.7544	0.003406	0.27126	0.079365	0.99996	-0.14605	-0.2638	0.59616	0.96559	0.79193	0.92875	-0.42855	-0.76802	0.29241	0.88554	0.44247	0.76612
Bcl2l1	4	-0.01204	1.08786	1.02659	-0.97936	-1.5215	0.0084897	0.38391	0.12814	0.88163	-0.96732	-1.7449	0.0067104	0.34715	0.080998	0.95279	-0.40854	-0.65159	0.17345	0.8362	0.51467	0.99998	-1.4964	-2.7508	0.0019318	0.20879	0.0059441	0.54895	-0.77291	-1.2035	0.091404	0.71689	0.22877	0.59652	-1.7995	-3.2449	0.005287	0.32198	0.0011749	0.066031
Bcl2l11	4	-0.72719	-0.456921	-0.3737	-0.31873	-0.96597	0.24595	0.84714	0.33406	0.91192	0.40846	1.014	0.41213	0.93813	0.31059	0.95279	-0.047601	-0.14773	0.96584	0.99891	0.88255	0.99998	0.40932	1.0319	0.26165	0.87525	0.30214	0.99996	0.35619	1.0982	0.50974	0.95035	0.27213	0.63093	0.72989	1.8316	0.12801	0.78885	0.067018	0.42287
Bcl2l12	4	-0.32775	0.62447	0.71848	0.11362	0.45299	0.92268	0.99682	0.65055	0.95485	0.44137	1.2746	0.35962	0.92543	0.20244	0.95279	0.11722	0.46793	0.53144	0.96208	0.63984	0.99998	-0.50725	-1.4701	0.14676	0.80087	0.14153	0.99996	-0.28292	-1.1244	0.41203	0.92393	0.26085	0.6222	-1.0014	-2.8821	0.055818	0.65351	0.0039501	0.13305
Bcl2l13	4	0.54967	-0.149698	-0.74234	0.6509	1.3224	0.065274	0.67348	0.18602	0.89431	0.10123	0.24533	0.94667	0.9935	0.8062	0.98719	0.039742	0.080714	0.75721	0.98162	0.93567	0.99998	0.18944	0.46411	0.67089	0.96902	0.64257	0.99996	-0.61441	-1.2375	0.14946	0.80262	0.21591	0.58613	0.12793	0.31197	0.95816	0.99642	0.75506	0.91662
Bcl2l14	4	-0.40618	-0.448531	-0.10571	0.18315	0.58764	0.7569	0.97512	0.55677	0.94385	0.58933	1.4907	0.17213	0.83472	0.13605	0.95279	0.066839	0.21437	0.67688	0.97931	0.83026	0.99998	0.51537	1.3069	0.14188	0.80075	0.19126	0.99996	-0.30284	-0.9689	0.38783	0.91136	0.3326	0.67672	-0.19713	-0.49932	0.53063	0.94979	0.61756	0.85321
Bcl2l2	4	0.28584	0.046101	-0.13962	-0.11787	-0.44691	0.54888	0.94437	0.65494	0.95545	-0.40371	-1.2457	0.1548	0.81454	0.21289	0.95279	-0.032567	-0.12452	0.98699	0.9998	0.9009	0.99998	-0.078668	-0.2475	0.71054	0.97483	0.80452	0.99996	0.16805	0.6398	0.84912	0.99286	0.5223	0.80042	0.30767	0.96469	0.64892	0.96839	0.3347	0.69939
Bcl3	4	-0.408609	0.374341	0.559444	0.089721	0.31169	0.98333	0.99774	0.75528	0.97152	0.49833	1.4043	0.27599	0.90154	0.16024	0.95279	0.29064	1.0158	0.17066	0.8362	0.30971	0.99998	-0.083701	-0.24009	0.70007	0.97395	0.81026	0.99996	0.052374	0.18194	0.92761	0.99678	0.85563	0.95274	-0.50707	-1.399	0.2369	0.86015	0.1618	0.54622
Bcl6	4	0.08274	-0.22224	1.69254	0.34307	0.68777	0.40684	0.9075	0.4916	0.93596	0.26033	0.71837	0.69737	0.97453	0.47253	0.95614	0.12841	0.26096	0.49896	0.95449	0.79412	0.99998	0.35065	0.97976	0.35163	0.90873	0.3272	0.99996	1.0956	2.2293	0.0061512	0.34181	0.025794	0.33029	-0.59694	-1.6495	0.18611	0.83676	0.099039	0.46607
Bcl7a	4	0.01857	0.442974	0.494441	0.25529	0.67269	0.59509	0.95293	0.50115	0.93634	0.23672	0.64987	0.74948	0.98142	0.51577	0.95614	0.39037	1.0281	0.074221	0.75621	0.30389	0.99998	-0.052604	-0.1469	0.76671	0.98051	0.88321	0.99996	-0.021949	-0.057728	0.79879	0.99003	0.95397	0.9867	-0.51639	-1.4102	0.23115	0.85607	0.15848	0.54344
Bcl7b	4	-0.13999	-0.48163	1.02226	0.10955	0.32759	0.93279	0.99703	0.74322	0.96894	0.24954	0.705	0.72152	0.97888	0.48081	0.95614	-0.15024	-0.44995	0.65157	0.97669	0.65275	0.99998	0.33139	0.9432	0.38376	0.91802	0.34558	0.99996	0.44392	1.3292	0.37075	0.90804	0.18378	0.55855	-0.57834	-1.6346	0.19674	0.84131	0.10213	0.47117
Bcl7c	4	-0.42585	-0.054509	0.34906	-0.10588	-0.27788	0.57292	0.95017	0.7811	0.97451	0.31997	0.56906	0.57658	0.96574	0.56932	0.95769	-0.11515	-0.31477	0.75288	0.98162	0.75293	0.99998	-0.060641	-0.11076	0.74851	0.98009	0.91181	0.99996	0.83275	2.2795	0.045956	0.61775	0.022636	0.3146	0.48369	0.87475	0.3741	0.91326	0.38171	0.73241
Bcl9	4	-0.48174	1.37975	0.04649	-1.0409	-2.7035	0.0061512	0.34174	0.0068617	0.57234	-0.55916	-1.4318	0.073357	0.71506	0.1522	0.95279	0.068548	0.19003	0.67206	0.97931	0.84929	0.99998	-1.3112	-3.4377	0.0041177	0.28826	0.00058657	0.15034	-0.59212	-1.5685	0.16095	0.81344	0.11676	0.48618	-0.63861	-1.6578	0.16517	0.8217	0.097368	0.46308
Bcl9l	4	0.42187	0.321011	-0.05956	0.73252	1.7666	0.035077	0.57571	0.077302	0.88163	0.31065	0.78514	0.59499	0.96624	0.43237	0.95614	0.31421	0.76051	0.14204	0.82225	0.44695	0.99998	-0.0068014	-0.017323	0.87138	0.99357	0.98618	0.99996	0.66596	1.6063	0.12826	0.77295	0.10821	0.47502	0.72552	1.847	0.13045	0.79076	0.064746	0.41837
Bclaf1	4	-0.14397	-1.07562	-0.10863	0.29332	1.1179	0.51045	0.93396	0.26362	0.89431	0.43729	1.2355	0.36658	0.92762	0.21664	0.95279	-0.41042	-1.5688	0.17178	0.8362	0.1167	0.99998	0.6652	1.9057	0.052666	0.65037	0.056686	0.99996	0.42727	1.6337	0.3952	0.91603	0.10233	0.46666	0.5359	1.5254	0.31147	0.89496	0.12717	0.50465
Bclaf3	4	0.23022	-0.419125	-0.34402	0.2361	0.94969	0.63439	0.95867	0.34227	0.91192	0.0058796	0.030014	0.73972	0.98142	0.97606	0.99593	-0.093095	-0.37776	0.82111	0.9856	0.70561	0.99998	0.32603	1.6966	0.39241	0.92068	0.089781	0.99996	-0.20898	-0.83731	0.50628	0.95035	0.40242	0.7283	0.13504	0.69559	0.94642	0.9964	0.48669	0.79023
Bco2	4	0.335767	0.255384	0.350636	0.37587	1.102	0.35128	0.89253	0.27048	0.89431	0.040103	0.1289	0.81582	0.98524	0.89744	0.99163	0.058484	0.17291	0.70159	0.97931	0.86273	0.99998	-0.1969	-0.63956	0.48849	0.93879	0.52246	0.99996	0.4231	1.2445	0.40125	0.918	0.21333	0.5846	0.072464	0.23427	0.94296	0.9964	0.81477	0.93843
Bcor	4	-0.6911	-0.5679	0.69474	-0.80017	-2.3764	0.022317	0.51225	0.017482	0.78925	-0.10907	-0.34816	0.51965	0.96296	0.72772	0.98024	-0.38294	-1.1388	0.20004	0.84751	0.25477	0.99998	0.18496	0.59621	0.6809	0.9727	0.55104	0.99996	0.12549	0.37324	0.93325	0.99772	0.70897	0.89337	-0.56925	-1.8201	0.2006	0.84395	0.068747	0.42513
Bcorl1	4	-0.13932	0.028454	-0.390799	0.2001	0.67655	0.71588	0.96877	0.49869	0.93634	0.33942	1.0995	0.53886	0.96345	0.27154	0.95279	0.092558	0.31333	0.59921	0.96994	0.75403	0.99998	0.064104	0.20832	0.96192	0.99668	0.83498	0.99996	-0.33554	-1.1307	0.35336	0.90156	0.25817	0.62023	0.055259	0.1794	0.91282	0.99244	0.85762	0.95239
Bdh1	4	-0.06578	-0.3264	0.12897	0.30481	0.89932	0.48569	0.92778	0.36848	0.91272	0.37059	0.97174	0.47832	0.95407	0.33118	0.95279	-0.53303	-1.5808	0.084439	0.77306	0.11392	0.99998	-0.20663	-0.54941	0.47252	0.93692	0.58273	0.99996	-0.26961	-0.78786	0.42697	0.92396	0.43078	0.74493	-0.39858	-1.0366	0.31625	0.89588	0.29994	0.67547
Bdh2	4	-0.137775	0.56646	0.6107	-0.10116	-0.24651	0.58208	0.95114	0.80529	0.97691	0.036615	0.073876	0.80901	0.98524	0.94111	0.99372	-0.57264	-1.4468	0.066341	0.74022	0.14796	0.99998	-1.1391	-2.3211	0.0079305	0.37772	0.020282	0.85984	-1.5888	-3.3363	0.006507	0.34946	0.00084909	0.050461	-2.1995	-3.581	0.0020335	0.21277	0.00034234	0.029797
Bdp1	4	0.45345	0.63994	-0.23142	-0.11364	-0.27476	0.55752	0.94591	0.7835	0.9748	-0.56709	-1.0511	0.070103	0.70433	0.29323	0.95279	-0.17292	-0.4278	0.58746	0.96721	0.6688	0.99998	-0.81286	-1.5451	0.035941	0.59966	0.12233	0.99996	-0.39692	-0.95669	0.29287	0.88508	0.33873	0.68068	-0.1655	-0.31281	0.56916	0.95604	0.75442	0.91631
Becn1	4	0.626185	0.39156	0.812771	0.64831	1.2011	0.066901	0.67801	0.22973	0.89431	0.022125	0.042315	0.77657	0.98142	0.96625	0.99538	0.25457	0.4769	0.22337	0.86456	0.63343	0.99998	-0.13699	-0.28479	0.59575	0.95712	0.77581	0.99996	0.020301	0.03722	0.87301	0.99535	0.97031	0.99096	-0.79247	-1.4757	0.1033	0.74442	0.14003	0.52273
Bend3	4	0.284805	-0.207948	-0.438877	-0.010455	-0.055062	0.77627	0.97685	0.95609	0.99432	-0.29526	-1.1663	0.25566	0.89851	0.24348	0.95279	-0.18698	-0.98663	0.55081	0.96474	0.32382	0.99998	0.020968	0.084625	0.93762	0.9952	0.93256	0.99996	0.00015335	0.00080734	0.83661	0.99211	0.99936	0.99971	0.43903	1.7638	0.43419	0.92967	0.077773	0.43646
Bend4	4	-0.0148943	0.08014	0.02413	-0.0052242	-0.017575	0.78888	0.97795	0.98598	0.99857	0.0096701	0.03522	0.74897	0.98142	0.9719	0.99569	-0.25947	-0.89368	0.38849	0.92317	0.37149	0.99998	-0.33961	-1.2686	0.28717	0.88779	0.2046	0.99996	0.2844	0.97229	0.6324	0.97105	0.33091	0.67575	0.26027	0.96631	0.72909	0.97483	0.33389	0.69879
Bend6	4	-0.85595	-0.3986	0.43999	-0.62328	-2.2121	0.05775	0.64729	0.02696	0.87315	0.23267	0.6588	0.75741	0.98142	0.51002	0.95614	-0.10087	-0.37007	0.79711	0.982	0.71133	0.99998	0.29773	0.85324	0.44334	0.93406	0.39353	0.99996	0.56894	2.0807	0.21875	0.85658	0.037462	0.36526	0.12895	0.3669	0.95603	0.9964	0.7137	0.8988
Bet1	4	0.82351	0.115088	-0.0229941	0.62809	1.4741	0.077474	0.70133	0.14045	0.88303	-0.19542	-0.52996	0.37888	0.92917	0.59614	0.9602	0.10696	0.25086	0.55884	0.96474	0.80193	0.99998	-0.0081285	-0.022338	0.86813	0.99357	0.98218	0.99996	-0.021694	-0.050726	0.7993	0.99003	0.95954	0.98733	0.0013001	0.003553	0.82167	0.98405	0.99717	0.99897
Bet1l	4	-0.42518	-0.58311	0.650733	-0.14207	-0.42874	0.50292	0.93102	0.66811	0.95611	0.28311	0.70572	0.64816	0.96823	0.48036	0.95614	0.27467	0.83931	0.19084	0.83986	0.40129	0.99998	0.85778	2.157	0.0099131	0.39	0.031007	0.9571	0.60434	1.8411	0.18184	0.82912	0.065607	0.42034	-0.046393	-0.1159	0.74709	0.97561	0.90773	0.96913
Bex3	4	-0.369481	-0.51926	0.012797	-0.097331	-0.39171	0.5898	0.95242	0.69527	0.96119	0.27215	1.0638	0.67307	0.97002	0.28744	0.95279	-0.21631	-0.87039	0.48066	0.9535	0.38409	0.99998	0.30295	1.1868	0.43328	0.9329	0.23532	0.99996	-0.016745	-0.067345	0.80814	0.99003	0.94631	0.98386	-0.029542	-0.11562	0.77337	0.97757	0.90795	0.96913
Bfar	4	0.35338	-0.738043	-0.28104	0.52158	1.108	0.15785	0.78667	0.26785	0.89431	0.1682	0.3759	0.90199	0.99168	0.70699	0.97779	0.059077	0.12651	0.69981	0.97931	0.89933	0.99998	0.79712	1.8348	0.017081	0.47932	0.066535	0.99996	-0.8104	-1.6863	0.081592	0.70524	0.091743	0.45665	-0.52936	-1.1784	0.22312	0.85395	0.23865	0.62181
Bhlhe40	4	0.37883	1.02869	-1.14128	0.50676	1.2111	0.17259	0.8008	0.22587	0.89431	0.12793	0.25597	0.9937	0.9998	0.79797	0.98631	-0.0084123	-0.020375	0.90844	0.99294	0.98374	0.99998	-1.0371	-2.0841	0.012404	0.42024	0.037154	0.96469	-0.44167	-1.0318	0.25444	0.87104	0.30216	0.65438	0.69961	1.419	0.14819	0.80703	0.1559	0.54031
Bhlhe41	4	-0.84724	-0.12135	-0.09039	0.24626	0.60938	0.61415	0.95506	0.54227	0.94059	1.0935	1.7056	0.003711	0.24415	0.088076	0.95279	0.13227	0.33444	0.48823	0.95378	0.73805	0.99998	0.25362	0.40096	0.5318	0.9486	0.68845	0.99996	0.21368	0.53062	0.7632	0.98835	0.59568	0.8417	0.30407	0.46844	0.65462	0.96839	0.63947	0.86546
Bhmt	4	-0.191508	0.0894136	-0.60559	0.065832	0.30227	0.95933	0.99703	0.76245	0.9737	0.25734	0.78767	0.70444	0.97475	0.43089	0.95614	-0.0058874	-0.027762	0.89975	0.99288	0.97785	0.99998	-0.095301	-0.29895	0.67343	0.96927	0.76498	0.99996	-0.14432	-0.66279	0.5989	0.96721	0.50746	0.79146	0.46127	1.4374	0.40476	0.92283	0.1506	0.53533
Bhmt2	4	0.26043	-0.33346	0.16857	0.3521	0.78898	0.3921	0.90475	0.43012	0.92906	0.09167	0.21702	0.92568	0.99251	0.82819	0.98896	-0.2714	-0.60735	0.36439	0.91451	0.54362	0.99998	0.06206	0.14808	0.96619	0.99729	0.88228	0.99996	0.83695	1.8757	0.044685	0.60942	0.060696	0.4106	0.66838	1.5935	0.17366	0.82322	0.11105	0.48392
Bicd2	4	0.18235	-0.12968	0.34218	0.47478	1.4271	0.20853	0.82336	0.15355	0.88661	0.29243	0.92361	0.6294	0.96624	0.35569	0.9542	0.23814	0.71967	0.25174	0.87491	0.47173	0.99998	0.36782	1.1699	0.3255	0.90396	0.24204	0.99996	-0.04554	-0.13627	0.7569	0.9876	0.8916	0.96557	-0.38772	-1.2249	0.32678	0.90168	0.22062	0.60623
Bicdl1	4	-0.488993	0.43694	-0.137189	0.015697	0.06899	0.84063	0.98664	0.945	0.99301	0.50469	1.5279	0.26826	0.89851	0.12654	0.95279	0.22044	0.98747	0.28423	0.89185	0.32341	0.99998	-0.2165	-0.66145	0.45681	0.93546	0.50832	0.99996	0.072081	0.31789	0.96482	0.99906	0.75057	0.90976	0.20927	0.63553	0.81714	0.98276	0.52508	0.8109
Bicra	4	-0.1663	-1.28858	-1.2826	0.42662	1.2611	0.27208	0.86008	0.20728	0.89431	0.59292	1.6704	0.16903	0.83375	0.094844	0.95279	-0.74795	-2.206	0.024198	0.57888	0.027385	0.99998	0.54063	1.5301	0.12109	0.77673	0.12598	0.99996	-1.6401	-4.7161	0.0055412	0.32059	2.4041e-06	0.00085985	-0.3575	-1.0044	0.3527	0.91014	0.31517	0.68566
Bicral	4	0.398837	0.309641	-0.194325	0.3376	1.3351	0.41676	0.91151	0.18185	0.89313	-0.061237	-0.22565	0.60663	0.96624	0.82147	0.98881	0.087631	0.35399	0.6139	0.97223	0.72335	0.99998	-0.22201	-0.84786	0.44843	0.93406	0.39652	0.99996	-0.20997	-0.82165	0.50521	0.95035	0.41127	0.73294	-0.015645	-0.058536	0.79488	0.98124	0.95332	0.98358
Bid	4	0.190196	-0.58768	-0.20418	-0.037304	-0.15939	0.7145	0.96877	0.87336	0.98187	-0.2275	-0.92093	0.33471	0.92085	0.35709	0.9542	-0.28018	-1.1967	0.34853	0.91393	0.23142	0.99998	0.3075	1.251	0.42555	0.9288	0.21094	0.99996	-0.37493	-1.599	0.31335	0.89053	0.10982	0.47701	-0.17075	-0.69352	0.56281	0.95571	0.48799	0.79094
Bin1	4	-0.33412	-0.260731	0.47065	-0.701	-1.9629	0.037619	0.5771	0.049656	0.88163	-0.36688	-1.3678	0.18428	0.84558	0.17137	0.95279	0.076759	0.21694	0.64648	0.97593	0.82826	0.99998	0.33749	1.2836	0.37339	0.91515	0.19928	0.99996	0.29323	0.82671	0.61588	0.96991	0.4084	0.73113	-0.17742	-0.66771	0.55478	0.95417	0.50432	0.80129
Bin2	4	0.28876	0.14068	0.10877	0.42005	0.94989	0.28173	0.86574	0.34217	0.91192	0.13129	0.35807	0.98622	0.99923	0.72029	0.9792	0.392	0.89156	0.073255	0.75621	0.37263	0.99998	0.25132	0.69347	0.53617	0.94898	0.48801	0.99996	0.359	0.81132	0.50521	0.95035	0.41718	0.73593	0.25023	0.68576	0.74678	0.97561	0.49286	0.79428
Bin3	4	-1.04842	-0.02557	-0.40361	-1.1021	-3.1126	0.0044228	0.29492	0.0018543	0.30145	-0.053682	-0.13243	0.62173	0.96624	0.89464	0.99163	-0.17459	-0.52688	0.5836	0.96717	0.59827	0.99998	-0.14902	-0.38246	0.57328	0.95257	0.70212	0.99996	-0.19222	-0.56562	0.5291	0.95416	0.57165	0.82785	0.21139	0.53505	0.81399	0.98276	0.59262	0.84383
Birc2	4	-0.59519	-0.178847	-0.051637	0.18921	0.7018	0.74323	0.97378	0.48281	0.93596	0.7844	2.4004	0.050633	0.67758	0.016378	0.95279	-0.018907	-0.070327	0.94261	0.99667	0.94393	0.99998	0.15994	0.49141	0.73662	0.97852	0.62314	0.99996	0.033621	0.12456	0.89594	0.99608	0.90087	0.96799	0.085258	0.26076	0.96574	0.99758	0.79428	0.93017
Birc3	4	-0.16271	-0.40332	-0.18055	0.36802	1.0036	0.36389	0.89521	0.31557	0.90819	0.53073	1.3129	0.23563	0.89066	0.18921	0.95279	-0.19779	-0.54074	0.52387	0.95968	0.58869	0.99998	0.20553	0.51706	0.63484	0.96234	0.60511	0.99996	-0.33724	-0.91393	0.35092	0.89988	0.36075	0.69764	-0.15669	-0.3862	0.58035	0.9582	0.69935	0.8933
Birc5	4	1.35047	0.38993	-0.16261	0.55204	1.1455	0.12968	0.76536	0.25202	0.89431	-0.79843	-1.4787	0.019572	0.52524	0.13921	0.95279	-0.34833	-0.7195	0.24086	0.87223	0.47183	0.99998	-0.73826	-1.4139	0.050277	0.64541	0.15739	0.99996	-0.3158	-0.64941	0.37354	0.90918	0.51607	0.79723	-0.15319	-0.29094	0.58507	0.96044	0.7711	0.92268
Birc6	4	-0.97098	0.37997	0.22213	-0.31576	-0.67031	0.2493	0.84771	0.50266	0.93634	0.65522	1.1763	0.11804	0.77972	0.23946	0.95279	0.72084	1.625	0.0017284	0.20482	0.10416	0.99998	0.34087	0.64044	0.36739	0.90873	0.52188	0.99996	-0.21281	-0.45493	0.50089	0.95035	0.64916	0.8691	-0.43494	-0.75641	0.28707	0.88374	0.4494	0.76995
Bivm	4	0.11614	-0.06955	-0.02861	0.61046	1.2264	0.087693	0.71696	0.22004	0.89431	0.49432	1.019	0.28123	0.90218	0.3082	0.95279	0.63775	1.2927	0.0048803	0.32765	0.1961	0.99998	0.7073	1.477	0.037466	0.60791	0.13967	0.99996	0.72262	1.4554	0.092624	0.71906	0.14557	0.51834	0.75123	1.5612	0.11392	0.76257	0.11849	0.49296
Blcap	4	-0.44615	0.47286	-0.442348	-0.28847	-1.0107	0.28006	0.86526	0.31215	0.90637	0.15768	0.50795	0.92624	0.99251	0.61149	0.96217	0.3089	1.0858	0.14859	0.82903	0.27758	0.99998	-0.16396	-0.53415	0.5473	0.95001	0.59324	0.99996	0.012942	0.045351	0.85944	0.9933	0.96383	0.9886	0.45529	1.4801	0.41289	0.92288	0.13886	0.52118
Blm	4	1.33701	0.10014	-0.33611	1.1847	1.3077	0.0005592	0.089431	0.19098	0.89431	-0.15231	-0.26613	0.44705	0.94521	0.79014	0.98631	0.43324	0.47675	0.050023	0.68613	0.63354	0.99998	0.3331	0.58777	0.38112	0.91802	0.55668	0.99996	0.83209	0.91569	0.046312	0.61889	0.35983	0.6967	1.1682	2.0623	0.0050836	0.31348	0.039176	0.37147
Blmh	4	0.0418	-0.3876	-0.05978	0.23659	1.0485	0.63342	0.95867	0.29442	0.8993	0.19479	0.83758	0.84083	0.9877	0.40226	0.95614	-0.22912	-1.0179	0.4527	0.94572	0.30871	0.99998	0.15848	0.6851	0.73967	0.97855	0.49328	0.99996	-0.32315	-1.4267	0.36561	0.90554	0.15368	0.52749	-0.26337	-1.134	0.45036	0.93361	0.25682	0.63971
Blnk	4	0.22517	0.361055	-0.56592	0.71968	1.4351	0.038737	0.58333	0.15127	0.88428	0.49451	0.71838	0.28102	0.90218	0.47253	0.95614	0.32026	0.64493	0.13578	0.81727	0.51897	0.99998	-0.040795	-0.060278	0.79416	0.98668	0.95193	0.99996	0.44198	0.87958	0.37314	0.90898	0.37909	0.71093	1.0079	1.4919	0.021809	0.53602	0.13573	0.51674
Bloc1s1	4	0.02441	1.47198	-0.13281	0.36509	0.51857	0.36897	0.89567	0.60406	0.94794	0.34068	0.64561	0.53622	0.96345	0.51853	0.95614	0.35778	0.51837	0.10066	0.79185	0.6042	0.99998	-1.1142	-2.1097	0.0092014	0.38763	0.034888	0.96118	-0.82168	-1.1437	0.078745	0.70449	0.25273	0.61635	-0.68887	-1.2898	0.14244	0.79847	0.19711	0.58333
Bloc1s2	4	-0.449433	0.0147	0.0109	-0.52232	-2.085	0.096081	0.72248	0.037071	0.88163	-0.072887	-0.20703	0.58462	0.96595	0.83599	0.98896	-0.1876	-0.75701	0.54908	0.96474	0.44904	0.99998	-0.2023	-0.57873	0.47989	0.93879	0.56277	0.99996	-0.20292	-0.81286	0.51345	0.95136	0.4163	0.73526	-0.21382	-0.60984	0.50897	0.94671	0.54197	0.81983
Bloc1s3	4	-0.024836	-0.13333	0.114719	-0.044561	-0.13812	0.69813	0.96721	0.89015	0.98476	-0.019725	-0.037998	0.68781	0.9735	0.96969	0.99569	0.2253	0.71609	0.27543	0.88911	0.47394	0.99998	0.35863	0.71585	0.33842	0.90848	0.47408	0.99996	0.11461	0.35785	0.95598	0.99841	0.72046	0.89697	-0.00010918	-0.00021244	0.81918	0.98322	0.99983	0.99988
Bloc1s4	4	-0.49937	0.02497	0.15376	-0.15072	-0.37962	0.48716	0.92778	0.70422	0.96263	0.34865	0.78596	0.51929	0.96296	0.43189	0.95614	-0.20036	-0.52132	0.51736	0.95794	0.60214	0.99998	-0.22533	-0.52186	0.44299	0.93406	0.60177	0.99996	0.53751	1.3928	0.25149	0.86977	0.16368	0.53662	0.38375	0.8793	0.52356	0.94979	0.37924	0.73047
Bloc1s5	4	-0.39433	0.935213	0.612228	0.23293	0.73403	0.64171	0.95907	0.46293	0.93596	0.62726	1.6493	0.13934	0.81095	0.099077	0.95279	0.088923	0.28734	0.60963	0.97167	0.77385	0.99998	-0.84629	-2.22	0.030756	0.57318	0.026417	0.93574	0.59584	1.9087	0.18916	0.83248	0.056296	0.40441	-0.016388	-0.042871	0.7934	0.98078	0.9658	0.98769
Bloc1s6	4	-1.3946	0.36912	0.17897	-1.4632	-3.7433	0.00061004	0.094488	0.00018164	0.077673	-0.068604	-0.16975	0.59214	0.96624	0.8652	0.98984	0.20091	0.51728	0.32484	0.90839	0.60496	0.99998	-0.16821	-0.41918	0.53993	0.94934	0.67509	0.99996	1.0466	2.696	0.0085913	0.36481	0.0070177	0.19173	0.86763	2.1632	0.056682	0.65493	0.030529	0.34061
Blvra	4	-0.217044	0.277013	-0.0948	-0.3125	-0.81224	0.25296	0.85201	0.41666	0.92633	-0.095456	-0.25379	0.54415	0.96468	0.79966	0.98631	-0.010177	-0.027525	0.91434	0.99294	0.97804	0.99998	-0.28719	-0.79272	0.35316	0.90873	0.42794	0.99996	-0.65036	-1.6813	0.13207	0.77948	0.092707	0.45797	-0.55556	-1.4761	0.20762	0.84515	0.13991	0.52273
Blvrb	4	-0.02063	0.13381	-0.10006	0.56444	1.5754	0.11947	0.75684	0.11517	0.88163	0.58507	1.7673	0.1761	0.83631	0.077178	0.95279	-0.14343	-0.40011	0.67089	0.97931	0.68907	0.99998	-0.27724	-0.83849	0.36561	0.90873	0.40176	0.99996	0.47441	1.3235	0.32662	0.89057	0.18568	0.56054	0.57447	1.7377	0.26415	0.87607	0.082265	0.4425
Blzf1	4	0.77806	0.017658	0.17618	0.39386	0.8869	0.32393	0.88558	0.37513	0.91292	-0.3842	-0.82374	0.16974	0.83433	0.41009	0.95614	0.061771	0.14008	0.69219	0.97931	0.8886	0.99998	0.044113	0.099688	0.9908	0.99821	0.92059	0.99996	0.47581	1.0738	0.325	0.89053	0.28292	0.64045	0.29963	0.6664	0.66158	0.96846	0.50516	0.80178
Bmf	4	-0.406923	-0.50442	-0.56353	-0.027883	-0.092145	0.73631	0.97302	0.92658	0.99091	0.37904	0.8031	0.465	0.95173	0.42191	0.95614	-0.66771	-2.2225	0.03706	0.64685	0.026249	0.99998	-0.16329	-0.35165	0.54873	0.95001	0.7251	0.99996	0.49487	1.6557	0.30019	0.88784	0.097775	0.46289	1.0584	2.2897	0.014641	0.48882	0.02204	0.3126
Bmi1	4	-0.36629	-0.00121	0.075967	0.21167	0.79002	0.69005	0.96586	0.42952	0.92906	0.57796	1.8656	0.18332	0.8445	0.062094	0.95279	0.17939	0.66935	0.36948	0.91746	0.50327	0.99998	0.1806	0.58429	0.69005	0.97288	0.55902	0.99996	0.16997	0.63359	0.84505	0.99267	0.52635	0.80306	0.094003	0.30386	0.98043	0.99866	0.76124	0.91791
Bmp1	4	-0.61499	-0.373024	-0.03578	-0.656	-1.5697	0.04804	0.61694	0.11648	0.88163	-0.04101	-0.082744	0.64654	0.96823	0.93406	0.99328	-0.46048	-1.1087	0.1277	0.81111	0.26757	0.99998	-0.087456	-0.1778	0.69168	0.97304	0.85888	0.99996	0.95356	2.3024	0.018759	0.47429	0.021312	0.3081	0.98934	2.0123	0.025266	0.55373	0.044191	0.38506
Bmp2	4	0.06162	-0.79481	0.29439	0.3918	0.74995	0.32733	0.88661	0.45329	0.93446	0.33018	0.83674	0.55803	0.96574	0.40274	0.95614	-0.28264	-0.54315	0.34365	0.91302	0.58702	0.99998	0.51217	1.3315	0.14463	0.80087	0.18303	0.99996	0.46574	0.89426	0.33938	0.89557	0.37118	0.70544	0.17135	0.43716	0.88399	0.99193	0.66199	0.87511
Bmp2k	4	-0.64809	-0.8215	-0.14977	-0.09664	-0.28145	0.59087	0.95242	0.77836	0.97382	0.55145	1.145	0.21173	0.87244	0.25219	0.95279	-0.41112	-1.1966	0.17101	0.8362	0.23147	0.99998	0.41038	0.85605	0.26048	0.87491	0.39197	0.99996	0.13579	0.39536	0.91363	0.99678	0.69258	0.88716	0.28556	0.59422	0.68654	0.97021	0.55236	0.82646
Bmpr1a	4	-0.589786	-0.10723	0.471334	0.084814	0.17	0.99537	0.99913	0.86501	0.98175	0.6746	1.327	0.10432	0.76226	0.1845	0.95279	-0.33451	-0.67832	0.25937	0.87894	0.49757	0.99998	-0.22728	-0.4503	0.4405	0.93406	0.65249	0.99996	0.49298	0.99903	0.30349	0.88935	0.31778	0.66565	0.021646	0.042439	0.85817	0.99092	0.96615	0.98775
Bmpr2	4	0.259643	0.46772	-0.652418	0.2571	0.86522	0.59168	0.95242	0.38692	0.91722	-0.002543	-0.0072069	0.72391	0.9789	0.99425	0.99932	0.12224	0.41293	0.51711	0.95794	0.67966	0.99998	-0.34548	-0.99679	0.28062	0.88207	0.31887	0.99996	-0.73893	-2.466	0.10116	0.72977	0.013665	0.26535	-0.086512	-0.24709	0.68243	0.96997	0.80484	0.93466
Bms1	4	0.90657	1.30945	1.1342	-0.14043	-0.26637	0.50597	0.93289	0.78996	0.9748	-1.047	-2.1674	0.0033552	0.23077	0.030204	0.95279	0.30975	0.60379	0.14743	0.82897	0.54598	0.99998	-0.9997	-2.1254	0.014844	0.45554	0.033551	0.96118	-0.9062	-1.7034	0.05958	0.66686	0.088498	0.45388	-2.0404	-4.2539	0.0029993	0.26577	2.1012e-05	0.004365
Bmt2	4	0.55715	-0.322189	-0.99653	0.32529	1.2005	0.44116	0.91782	0.22994	0.89431	-0.23186	-0.89142	0.32937	0.91896	0.3727	0.9542	-0.078479	-0.29082	0.86579	0.98838	0.77119	0.99998	0.24371	0.95065	0.55132	0.95013	0.34178	0.99996	-0.49898	-1.8261	0.21443	0.85551	0.067834	0.425	0.49755	1.9365	0.35763	0.91111	0.05281	0.39809
Bmyc	4	-0.19873	0.68763	-0.72337	0.32394	0.88559	0.44416	0.91967	0.37584	0.91303	0.52267	1.1913	0.24615	0.89551	0.23352	0.95279	-0.26482	-0.73837	0.37766	0.91978	0.46029	0.99998	-0.95245	-2.16	0.019013	0.49671	0.030772	0.9571	-0.95821	-2.4374	0.049159	0.62889	0.014795	0.27388	-0.23484	-0.52663	0.48416	0.94368	0.59845	0.8462
Bnip1	4	-0.754214	-0.45427	-0.37951	-0.098614	-0.25306	0.58726	0.95242	0.80022	0.97644	0.6556	1.2561	0.11779	0.77961	0.20908	0.95279	0.29543	0.78251	0.16446	0.8362	0.43392	0.99998	0.7497	1.4585	0.026028	0.54352	0.1447	0.99996	-0.13287	-0.342	0.61705	0.96991	0.73235	0.90185	0.24664	0.47359	0.75304	0.9757	0.6358	0.86265
Bnip2	4	-0.188085	-0.414815	-0.36894	-0.22181	-0.84801	0.37243	0.89817	0.39643	0.92052	-0.033725	-0.082914	0.66062	0.96985	0.93392	0.99328	-0.45035	-1.7237	0.13528	0.81727	0.084753	0.99998	-0.035535	-0.088785	0.80474	0.98669	0.92925	0.99996	0.31015	1.188	0.58604	0.9642	0.23484	0.60189	0.67909	1.694	0.1641	0.82068	0.090269	0.45333
Bnip3	4	0.512676	-0.54119	0.606563	0.48194	1.6258	0.20096	0.82037	0.104	0.88163	-0.030736	-0.075708	0.66631	0.97002	0.93965	0.99328	-0.10341	-0.34804	0.78852	0.982	0.72781	0.99998	0.43778	1.0904	0.22419	0.85623	0.27556	0.99996	-0.022617	-0.076066	0.79793	0.99003	0.93937	0.98129	-0.62918	-1.5537	0.16934	0.82322	0.12025	0.49533
Bnip3l	4	-0.62554	0.0318	0.288364	-0.38763	-1.7679	0.1793	0.8064	0.07708	0.88163	0.23791	1.0189	0.74628	0.98142	0.30826	0.95279	-0.23183	-1.0582	0.44685	0.94567	0.28997	0.99998	-0.26363	-1.1341	0.38519	0.91832	0.25677	0.99996	0.25663	1.1713	0.68375	0.97609	0.24147	0.60845	-0.031734	-0.13621	0.77027	0.97757	0.89165	0.9634
Boc	4	0.07455	0.26487	-0.165286	-0.47116	-1.5474	0.12114	0.75843	0.12177	0.88163	-0.54571	-1.4998	0.078745	0.72723	0.13366	0.95279	-0.22831	-0.75678	0.45458	0.94572	0.44918	0.99998	-0.49318	-1.3833	0.15429	0.8074	0.16657	0.99996	-0.24429	-0.80458	0.45814	0.93894	0.42106	0.73867	-0.079004	-0.22039	0.69458	0.97169	0.82557	0.943
Bod1	4	-0.11815	0.84883	0.59989	-1.0248	-2.1581	0.0065579	0.34483	0.030921	0.88163	-0.90665	-2.3148	0.010371	0.41434	0.020624	0.95279	0.43877	0.95457	0.046719	0.68172	0.3398	0.99998	-0.41006	-1.0778	0.21768	0.85265	0.28113	0.99996	-0.55161	-1.1783	0.18143	0.82912	0.23866	0.60548	-1.1515	-2.9554	0.03528	0.59673	0.0031224	0.11535
Bod1l	4	-0.721697	-0.18853	0.65944	0.062753	0.16968	0.95343	0.99703	0.86526	0.98175	0.78445	1.7455	0.050582	0.67758	0.080897	0.95279	0.50037	1.3763	0.024249	0.57888	0.16872	0.99998	0.6889	1.5561	0.044024	0.6289	0.11969	0.99996	0.4676	1.2746	0.33603	0.89255	0.20245	0.5745	-0.19184	-0.42368	0.53719	0.95073	0.6718	0.88006
Bola1	4	-0.172271	0.06617	0.04987	-0.052331	-0.097879	0.6811	0.96528	0.92203	0.98992	0.11994	0.23892	0.98861	0.99923	0.81116	0.98772	-0.27833	-0.53047	0.35153	0.91419	0.59579	0.99998	-0.3445	-0.70342	0.28189	0.88309	0.48179	0.99996	0.89301	1.7112	0.029587	0.53542	0.08704	0.45284	0.84314	1.7301	0.066443	0.67835	0.083608	0.44431
Bola2	4	-0.230919	-0.17271	-0.06615	-0.060269	-0.18875	0.66479	0.96052	0.85029	0.98175	0.17065	0.37486	0.89589	0.99092	0.70776	0.97795	-0.39807	-1.2496	0.18413	0.83746	0.21146	0.99998	-0.22536	-0.49602	0.44289	0.93406	0.61988	0.99996	0.48589	1.5266	0.31234	0.89053	0.12685	0.50025	0.55204	1.2153	0.2889	0.88534	0.22426	0.60958
Bola3	4	0.41881	-0.688642	-0.28234	0.14542	0.32943	0.84424	0.987	0.74183	0.96878	-0.27339	-0.51784	0.27975	0.90218	0.60457	0.96214	-0.066012	-0.15131	0.9059	0.99294	0.87973	0.99998	0.62263	1.2328	0.071171	0.702	0.21764	0.99996	0.24548	0.55828	0.70342	0.97806	0.57665	0.83057	0.52782	1.0288	0.31946	0.89886	0.30356	0.67809
Bop1	4	0.81103	0.0115906	-0.49959	0.51997	0.95012	0.15927	0.78957	0.34205	0.91192	-0.29106	-0.53605	0.26013	0.89851	0.59192	0.95981	0.017112	0.032562	0.82578	0.98712	0.97402	0.99998	0.0055214	0.010902	0.90056	0.99511	0.9913	0.99996	-0.38067	-0.66543	0.30792	0.89008	0.50577	0.7903	0.11892	0.22679	0.97509	0.99866	0.82059	0.94099
Bora	4	-0.0905149	-0.76083	-1.03867	-0.095018	-0.18087	0.59478	0.95292	0.85647	0.98175	-0.0045031	-0.0071758	0.72035	0.97874	0.99427	0.99932	-0.14366	-0.28334	0.67023	0.97931	0.77691	0.99998	0.61717	1.011	0.073662	0.70882	0.31202	0.99996	-0.10725	-0.20512	0.65452	0.97332	0.83748	0.94692	0.93142	1.5155	0.037161	0.60049	0.12965	0.50864
Borcs5	4	-1.24434	-0.84635	-0.50172	-0.19354	-0.51014	0.41772	0.91151	0.60995	0.94848	1.0508	1.8089	0.0057953	0.32386	0.07047	0.95279	-0.17941	-0.47228	0.57094	0.96652	0.63673	0.99998	0.66694	1.1611	0.052056	0.65037	0.24559	0.99996	0.46505	1.226	0.34025	0.89557	0.22018	0.58975	0.96677	1.6735	0.028926	0.57186	0.094226	0.45872
Borcs6	4	0.2029	-0.11404	0.857392	-0.12107	-0.36667	0.54293	0.94221	0.71386	0.96395	-0.32397	-0.8175	0.22612	0.88239	0.41364	0.95614	-0.29332	-0.89089	0.325	0.90839	0.37299	0.99998	-0.17928	-0.46181	0.51929	0.94594	0.64422	0.99996	-0.057468	-0.17395	0.7358	0.98396	0.86191	0.9552	-0.91486	-2.3139	0.072238	0.68859	0.020671	0.30507
Borcs7	4	0.71766	0.144462	0.16426	0.35053	0.73671	0.3949	0.90475	0.4613	0.93596	-0.36713	-0.88582	0.18403	0.84527	0.37572	0.9549	-0.038638	-0.082092	0.99451	0.9998	0.93457	0.99998	-0.1831	-0.45349	0.51197	0.94319	0.6502	0.99996	0.47227	0.9975	0.32911	0.89099	0.31852	0.66601	0.30801	0.75829	0.64867	0.96839	0.44828	0.76936
[truncated: 10,495 more rows]
