# Supplementary material for: Mitochondrial respiration contributes to the interferon gamma response in antigen-presenting cells
Source: eLife. 2021 Nov 2;10:e65109. doi: 10.7554/eLife.65109 (PMC8598164; doi:10.7554/eLife.65109)
Supplement: Figure 2—source data 1. [file elife-65109-fig2-data1.xlsx]

## Sheet: Sheet1
SupplementaryFile3. Whole genome profiling of the IFNg response in macrophages
Analysis performed using MAGeCK-MLE (Li et al . 2015); for additional details, see Materials and Methods
For all screens and replicates, sgRNA enrichment data were amalgamated and genes were tested for positive or negative enrichment; the cumulative effect of a gene on all 3 markers was calculated as the beta-positive minus the beta-negative for each marker
"beta": selection coefficient (enrichment) for given gene on all screens
"z": z-score
"p-value": P value derived from permutation testing
"fdr": false discovery rate derived from permutaiton testing
"wald-p-value": P value derived from Wald test
"wald-fdr": false discovery rate derived from Wald test
						Positive selection (High expressing)						Negative selection (Low expressing)
Gene	sum_beta	sum_rank	neg rank	pos rank	sgRNA	pos|beta	pos|z	pos|p-value	pos|fdr	pos|wald-p-value	pos|wald-fdr	neg|beta	neg|z	neg|p-value	neg|fdr	neg|wald-p-value	neg|wald-fdr
0610009B22Rik	0.211911	9175	8023	3933	4	0.16963	0.60688	0.5329	0.88127	0.54393	0.99964	-0.042281	-0.15019	0.5329	0.86986	0.88062	0.99182
0610010F05Rik	-0.411268	762	2008	8753	4	-0.075798	-0.30781	0.49675	0.86477	0.75823	0.99964	0.33547	1.3693	0.24688	0.71351	0.17089	0.96437
0610010K14Rik	0.23577	9422	986	161	4	0.68766	1.7458	0.0013673	0.09816	0.080844	0.99964	0.45189	1.1414	0.079474	0.52189	0.25372	0.96437
0610030E20Rik	0.191313	8947	9987	7978	4	-0.031177	-0.10725	0.65228	0.92434	0.91459	0.99964	-0.22249	-0.76045	0.19749	0.67542	0.44698	0.96642
1110004F10Rik	-0.0895275	4483	7230	8810	4	-0.079729	-0.30713	0.48573	0.85991	0.75874	0.99964	0.0097985	0.037845	0.68023	0.91927	0.96981	0.99748
1110008P14Rik	-0.097879	4336	4827	6329	4	0.052481	0.24218	0.98411	0.99706	0.80864	0.99964	0.15036	0.69386	0.82131	0.96604	0.48777	0.96642
1110032A03Rik	-0.439471	636	1233	7822	4	-0.022331	-0.075953	0.68433	0.93302	0.93946	0.99964	0.41714	1.4264	0.11391	0.57556	0.15376	0.96437
1110038F14Rik	-0.090214	4472	4950	6326	4	0.052616	0.19503	0.98462	0.99714	0.84537	0.99964	0.14283	0.52904	0.85079	0.97591	0.59678	0.97075
1110051M20Rik	-0.28599	1690	281	1422	4	0.34687	1.1243	0.10366	0.57244	0.2609	0.99964	0.63286	2.0567	0.0072637	0.26235	0.039715	0.96437
1110059E24Rik	0.015929	6370	7084	6692	4	0.034384	0.078982	0.90497	0.97992	0.93705	0.99964	0.018455	0.04227	0.70971	0.92887	0.96628	0.99685
1110059G10Rik	-0.1672	3255	1806	3671	4	0.18451	0.67903	0.47513	0.85361	0.49712	0.99964	0.35171	1.2956	0.21518	0.69094	0.1951	0.96437
1110065P20Rik	0.066898	7208	7671	6424	4	0.04798	0.18916	0.96402	0.99401	0.84997	0.99964	-0.018918	-0.074311	0.59768	0.89269	0.94076	0.99565
1190005I06Rik	0.01483	6356	3862	3015	4	0.22135	1.0242	0.35669	0.79756	0.30576	0.99964	0.20652	0.95487	0.61272	0.89782	0.33964	0.96437
1190007I07Rik	-0.132996	3798	7015	9273	4	-0.1105	-0.58923	0.39916	0.82164	0.55571	0.99964	0.022496	0.11999	0.72466	0.93368	0.90449	0.99413
1300017J02Rik	0.108665	7886	7371	5123	4	0.10937	0.448	0.77329	0.95585	0.65415	0.99964	0.00070486	0.0028774	0.65399	0.91	0.9977	0.99924
1600012H06Rik	-0.03021	5557	2939	2789	4	0.23646	0.64642	0.31243	0.76968	0.51801	0.99964	0.26667	0.72982	0.42001	0.81369	0.4655	0.96642
1600014C10Rik	0.09814	7715	10885	10887	4	-0.28454	-1.048	0.11895	0.59033	0.29464	0.99964	-0.38268	-1.4043	0.082635	0.53099	0.16022	0.96437
1700003E16Rik	0.247543	9546	8153	3469	4	0.1967	0.76784	0.43471	0.83582	0.44258	0.99964	-0.050843	-0.19742	0.51188	0.86398	0.8435	0.98699
1700003F12Rik	-0.0709	4787	876	1053	4	0.39604	1.3415	0.061186	0.50103	0.17976	0.99964	0.46694	1.5805	0.066741	0.50812	0.114	0.96437
1700008O03Rik	0.080041	7420	7624	6074	4	0.063963	0.31843	0.96496	0.99428	0.75016	0.99964	-0.016078	-0.079793	0.60588	0.89599	0.9364	0.99565
1700010I14Rik	-0.01936	5731	10165	10759	4	-0.26376	-0.96769	0.13707	0.60758	0.3332	0.99964	-0.2444	-0.89998	0.17595	0.65936	0.36813	0.96437
1700017B05Rik	-0.058587	4997	5809	6623	4	0.037561	0.12074	0.91728	0.9809	0.9039	0.99964	0.096148	0.30838	0.98052	0.99758	0.75779	0.97906
1700020D05Rik	0.05389	7001	2615	1460	4	0.34294	1.0509	0.10784	0.57453	0.2933	0.99964	0.28905	0.88287	0.35746	0.78363	0.37731	0.96437
1700025G04Rik	-0.42493	700	3134	9999	4	-0.17096	-0.50588	0.26423	0.73884	0.61294	0.99964	0.25397	0.76094	0.45847	0.83357	0.44669	0.96642
1700029J07Rik	-0.04543	5250	1242	1219	4	0.37031	1.6612	0.082294	0.54747	0.096681	0.99964	0.41574	1.8625	0.11588	0.57702	0.062539	0.96437
1700030J22Rik	0.168917	8663	9067	6517	4	0.043057	0.20324	0.94155	0.9864	0.83895	0.99964	-0.12586	-0.59106	0.34199	0.77557	0.55448	0.96642
1700030K09Rik	-0.2298	2373	2018	5211	4	0.10463	0.23241	0.79303	0.96103	0.81622	0.99964	0.33443	0.74801	0.24893	0.71411	0.45446	0.96642
1700037C18Rik	0.119412	8034	7695	5335	4	0.098327	0.49329	0.81798	0.96667	0.62181	0.99964	-0.021085	-0.10532	0.59118	0.88937	0.91612	0.99413
1700037H04Rik	-0.30847	1464	4754	9811	4	-0.15382	-0.67487	0.29969	0.76443	0.49976	0.99964	0.15465	0.68022	0.80516	0.96212	0.49636	0.96642
1700066M21Rik	-0.337945	1234	1791	7083	4	0.015575	0.054789	0.83123	0.97043	0.95631	0.99964	0.35352	1.2516	0.21159	0.68663	0.2107	0.96437
1700088E04Rik	-0.0105	5893	5101	4815	4	0.12375	0.52072	0.71133	0.94166	0.60256	0.99964	0.13425	0.56526	0.88036	0.98021	0.5719	0.96642
1700109H08Rik	0.4467	10851	8343	1139	4	0.38226	1.3614	0.071184	0.51933	0.1734	0.99964	-0.06444	-0.22788	0.47291	0.84239	0.81974	0.98591
1700123O20Rik	-0.19362	2852	573	1526	4	0.33658	1.1602	0.11639	0.58555	0.24598	0.99964	0.5302	1.8278	0.031875	0.41685	0.067577	0.96437
1810009A15Rik	0.052206	6977	5916	4459	4	0.14168	0.34771	0.63596	0.91941	0.72806	0.99964	0.089474	0.2186	0.9565	0.99308	0.82696	0.98591
1810013L24Rik	0.140873	8306	8759	6518	4	0.042964	0.064291	0.94112	0.9864	0.94874	0.99964	-0.097909	-0.1459	0.39574	0.80539	0.884	0.99186
1810024B03Rik	0.25226	9596	10867	9483	4	-0.12664	-0.36024	0.35763	0.79775	0.71867	0.99964	-0.3789	-1.0699	0.08443	0.53434	0.28467	0.96437
1810030O07Rik	-0.169713	3214	5776	8687	4	-0.072077	-0.30031	0.50957	0.87115	0.76394	0.99964	0.097636	0.4066	0.9847	0.99758	0.6843	0.9733
1810037I17Rik	-0.381794	921	1011	6042	4	0.065966	0.13962	0.95608	0.99132	0.88896	0.99964	0.44776	0.95236	0.083832	0.53373	0.34091	0.96437
1810055G02Rik	0.260899	9671	10083	6856	4	0.026789	0.11876	0.87344	0.97576	0.90546	0.99964	-0.23411	-1.03	0.18552	0.66769	0.30301	0.96437
2010315B03Rik	-0.134713	3761	5172	7477	4	-0.0041929	-0.0077066	0.75064	0.94853	0.99385	0.99964	0.13052	0.24093	0.89284	0.98102	0.80961	0.98555
2210016F16Rik	-0.035289	5457	7821	8562	4	-0.064995	-0.30119	0.53341	0.88127	0.76327	0.99964	-0.029706	-0.13764	0.56529	0.87767	0.89053	0.99264
2210016L21Rik	-0.166686	3262	4024	6768	4	0.030984	0.11345	0.88968	0.97813	0.90968	0.99964	0.19767	0.72753	0.6416	0.90627	0.4669	0.96642
2210408I21Rik	-0.234557	2310	6027	9779	4	-0.15113	-0.47196	0.30482	0.76594	0.63695	0.99964	0.083427	0.26086	0.93164	0.98725	0.7942	0.98507
2300009A05Rik	0.032755	6656	7649	7095	4	0.015063	0.078249	0.82935	0.97011	0.93763	0.99964	-0.017692	-0.091689	0.60118	0.89413	0.92694	0.99432
2310009B15Rik	0.399086	10614	7288	1005	4	0.40552	1.8617	0.054692	0.48706	0.062646	0.99964	0.006434	0.02929	0.671	0.91698	0.97663	0.99805
2310011J03Rik	-0.468415	528	5924	11286	4	-0.37938	-0.86718	0.065032	0.50496	0.38584	0.99964	0.089035	0.20657	0.9542	0.99218	0.83635	0.98591
2310022A10Rik	-0.199422	2761	4383	7834	4	-0.023052	-0.1023	0.68151	0.93242	0.91852	0.99964	0.17637	0.78564	0.72347	0.93361	0.43208	0.96642
2310022B05Rik	0.052709	6980	6821	5575	4	0.087825	0.28428	0.85985	0.9723	0.77619	0.99964	0.035116	0.11342	0.76824	0.94951	0.9097	0.99413
2310033P09Rik	-0.19375	2851	2046	4528	4	0.13831	0.5992	0.65066	0.92314	0.54904	0.99964	0.33206	1.4399	0.25329	0.71785	0.14991	0.96437
2310039H08Rik	-0.1895	2927	724	1866	4	0.30538	0.48738	0.1639	0.64557	0.62599	0.99964	0.49488	0.79405	0.048197	0.46305	0.42717	0.96642
2310057M21Rik	0.269827	9749	6698	1785	4	0.31341	0.95493	0.14912	0.62011	0.33961	0.99964	0.043583	0.13162	0.7979	0.9606	0.89529	0.9934
2310061I04Rik	-0.465055	541	1479	8819	4	-0.080335	-0.20076	0.48376	0.85829	0.84089	0.99964	0.38472	0.96983	0.16134	0.64854	0.33213	0.96437
2410002F23Rik	-0.308496	1463	2012	6862	4	0.026574	0.081047	0.87241	0.97535	0.9354	0.99964	0.33507	1.0241	0.24774	0.71411	0.30579	0.96437
2410004B18Rik	0.081146	7434	8245	6907	4	0.024171	0.078615	0.8637	0.97305	0.93734	0.99964	-0.056975	-0.18496	0.49368	0.85545	0.85326	0.98872
2510039O18Rik	-0.11271	4110	2068	3080	4	0.21786	0.85568	0.36823	0.80392	0.39217	0.99964	0.33057	1.2979	0.25688	0.71917	0.19432	0.96437
2610002M06Rik	0.31983	10133	11041	9180	4	-0.10347	-0.50386	0.41728	0.82819	0.61436	0.99964	-0.4233	-2.0472	0.066912	0.50844	0.040634	0.96437
2610008E11Rik	-0.167931	3241	4504	7361	4	0.0016392	0.0071144	0.77277	0.95563	0.99432	0.99964	0.16957	0.73592	0.75038	0.94358	0.46178	0.96642
2610301B20Rik	0.074118	7331	6250	4376	4	0.1459	0.51348	0.62143	0.91581	0.60762	0.99964	0.071782	0.25197	0.8913	0.98102	0.80106	0.98555
2610318N02Rik	-0.24926	2137	2924	7024	4	0.01838	0.050484	0.84225	0.97049	0.95974	0.99964	0.26764	0.73946	0.41702	0.81225	0.45963	0.96642
2610507B11Rik	0.61932	11314	10294	1316	4	0.35776	0.76493	0.092719	0.56066	0.44431	0.99964	-0.26156	-0.54906	0.15861	0.64601	0.58296	0.96993
2610524H06Rik	0.129055	8171	7221	4501	4	0.13933	0.36008	0.64681	0.92314	0.71879	0.99964	0.010275	0.026407	0.68228	0.92035	0.97893	0.99847
2700049A03Rik	0.353733	10355	10757	7350	4	0.0026729	0.012248	0.77705	0.95705	0.99023	0.99964	-0.35106	-1.5927	0.097163	0.55377	0.11122	0.96437
2700062C07Rik	0.78394	11518	11693	11666	4	-0.73376	-1.3791	0.021022	0.36324	0.16786	0.99964	-1.5177	-2.7957	0.00059819	0.066667	0.0051789	0.88889
2700081O15Rik	0.12031	8047	11348	11481	4	-0.4558	-1.6351	0.042386	0.45297	0.10203	0.99964	-0.57611	-2.0617	0.03478	0.41762	0.039234	0.96437
2700097O09Rik	-0.41688	738	2984	9793	4	-0.1524	-0.66203	0.3026	0.76443	0.50795	0.99964	0.26448	1.1545	0.42668	0.81598	0.2483	0.96437
2810004N23Rik	-0.05288	5116	2904	3099	4	0.21634	0.42755	0.37267	0.80628	0.66898	0.99964	0.26922	0.53087	0.41266	0.8105	0.59551	0.97075
2810006K23Rik	-0.108947	4167	5530	7369	4	0.001243	0.0066074	0.77132	0.95544	0.99473	0.99964	0.11019	0.58524	0.96838	0.99588	0.55839	0.96642
2810021J22Rik	0.230796	9381	9453	5996	4	0.067926	0.34578	0.94779	0.98921	0.72951	0.99964	-0.16287	-0.82256	0.27722	0.73339	0.41076	0.96642
2900026A02Rik	-0.12009	3985	2726	4084	4	0.16117	0.63986	0.56358	0.89594	0.52226	0.99964	0.28126	1.1162	0.37823	0.79561	0.26433	0.96437
3110001I22Rik	0.061505	7115	6082	4442	4	0.14241	0.50171	0.63297	0.91921	0.61587	0.99964	0.080905	0.28409	0.92224	0.98595	0.77634	0.98203
3110009E18Rik	0.112783	7937	7581	5320	4	0.099349	0.34783	0.81379	0.96494	0.72796	0.99964	-0.013434	-0.046864	0.61212	0.89729	0.96262	0.99685
3110040N11Rik	-0.20458	2688	9130	11139	4	-0.33515	-1.4917	0.085541	0.55426	0.13579	0.99964	-0.13057	-0.58124	0.33311	0.77104	0.56108	0.96642
3110082I17Rik	-0.0796	4650	2638	3250	4	0.20801	0.48949	0.39831	0.82164	0.62449	0.99964	0.28761	0.67685	0.36131	0.78552	0.4985	0.96642
3300002I08Rik	0.29437	9964	9447	4655	4	0.13206	0.3594	0.67604	0.931	0.71929	0.99964	-0.16231	-0.43765	0.27807	0.73395	0.66164	0.97289
3425401B19Rik	0.105265	7830	8667	7121	4	0.01399	0.05127	0.82439	0.96974	0.95911	0.99964	-0.091275	-0.33322	0.4089	0.80828	0.73897	0.97634
4430402I18Rik	-0.08861	4499	1946	2539	4	0.25261	0.99484	0.27269	0.74498	0.31981	0.99964	0.34122	1.3429	0.23577	0.70509	0.17931	0.96437
4833420G17Rik	-0.20342	2705	777	2151	4	0.28146	1.0415	0.20672	0.68881	0.29763	0.99964	0.48488	1.7956	0.054093	0.481	0.072553	0.96437
4833439L19Rik	0.03288	6658	11108	11404	4	-0.41414	-1.6838	0.053495	0.48574	0.092225	0.99964	-0.44702	-1.8164	0.059819	0.49275	0.069308	0.96437
4921507P07Rik	-0.258046	2016	2761	6994	4	0.020324	0.090357	0.8484	0.97076	0.928	0.99964	0.27837	1.241	0.38592	0.80021	0.21461	0.96437
4921517D22Rik	0.51652	11077	10509	3108	4	0.21579	0.95172	0.37378	0.80671	0.34124	0.99964	-0.30073	-1.3113	0.12759	0.59904	0.18976	0.96437
4921524J17Rik	0.056775	7042	8842	8296	4	-0.047595	-0.16621	0.59033	0.90395	0.86799	0.99964	-0.10437	-0.36309	0.38173	0.79754	0.71654	0.97434
4921536K21Rik	-0.120108	3984	7345	9363	4	-0.11745	-0.66675	0.37908	0.81041	0.50493	0.99964	0.0026575	0.015082	0.65937	0.9125	0.98797	0.99847
4930402H24Rik	-0.390912	882	8572	11506	4	-0.47477	-2.264	0.038711	0.43457	0.023576	0.99964	-0.083858	-0.40119	0.42574	0.81583	0.68828	0.9733
4930404N11Rik	-0.20828	2638	9614	11318	4	-0.38725	-1.4487	0.062468	0.50172	0.14743	0.99964	-0.17897	-0.6711	0.25406	0.7186	0.50216	0.96642
4930430F08Rik	-0.113077	4103	5709	7623	4	-0.011697	-0.040918	0.72278	0.94381	0.96736	0.99964	0.10138	0.35513	0.99966	0.99983	0.72249	0.97435
4930432K21Rik	-0.203	2712	676	1883	4	0.30324	0.98157	0.16724	0.65029	0.32631	0.99964	0.50624	1.643	0.041617	0.43716	0.10039	0.96437
4930453N24Rik	-0.158606	3414	4638	7333	4	0.0032442	0.012714	0.77893	0.95705	0.98986	0.99964	0.16185	0.635	0.77918	0.95297	0.52543	0.96642
4930503L19Rik	0.17063	8681	5587	2194	4	0.27801	0.88451	0.21424	0.69775	0.37642	0.99964	0.10738	0.33939	0.9777	0.99704	0.73432	0.97601
4930550C14Rik	-0.18493	2993	1911	4140	4	0.15879	0.57784	0.5711	0.89825	0.56337	0.99964	0.34372	1.253	0.23158	0.70288	0.21019	0.96437
4930579G24Rik	-0.02014	5722	1618	1397	4	0.34958	0.8971	0.10144	0.57006	0.36967	0.99964	0.36972	0.94714	0.18381	0.66677	0.34357	0.96437
4931406C07Rik	0.118806	8026	6641	4002	4	0.16596	0.77148	0.54632	0.88742	0.44042	0.99964	0.047154	0.21844	0.80995	0.9639	0.82708	0.98591
4931414P19Rik	-0.04899	5192	8810	9767	4	-0.15012	-0.57095	0.30696	0.76752	0.56803	0.99964	-0.10113	-0.38425	0.38831	0.80191	0.70079	0.9733
4931428F04Rik	-0.02358	5671	4816	4752	4	0.12754	0.42922	0.69638	0.93818	0.66776	0.99964	0.15112	0.50763	0.81832	0.96561	0.61171	0.97075
4932438A13Rik	-0.248717	2143	6429	10175	4	-0.18781	-0.75755	0.23329	0.71201	0.44872	0.99964	0.060907	0.24616	0.85541	0.9764	0.80556	0.98555
4933427D14Rik	0.333422	10226	7790	1860	4	0.30602	1.3643	0.16296	0.64426	0.17248	0.99964	-0.027402	-0.12118	0.57204	0.88079	0.90355	0.99413
4933430I17Rik	0.02773	6575	5690	4691	4	0.13024	0.47736	0.68347	0.93295	0.6331	0.99964	0.10251	0.37519	0.99539	0.99829	0.70752	0.97373
4933434E20Rik	0.01767	6401	4580	3696	4	0.18314	0.64004	0.48009	0.85577	0.52215	0.99964	0.16547	0.57857	0.76619	0.94878	0.56288	0.96642
5430427O19Rik	-0.47697	500	1605	9221	4	-0.10607	-0.43312	0.41087	0.82539	0.66493	0.99964	0.3709	1.5222	0.18159	0.66448	0.12796	0.96437
5730409E04Rik	0.217256	9234	6939	2649	4	0.24479	0.45412	0.29294	0.76166	0.64974	0.99964	0.027534	0.050817	0.74098	0.93833	0.95947	0.99671
5730455P16Rik	-0.088211	4506	7856	9395	4	-0.11972	-0.41607	0.37233	0.80611	0.67736	0.99964	-0.031509	-0.10943	0.55914	0.87523	0.91286	0.99413
6030458C11Rik	-0.21997	2491	917	2694	4	0.24188	0.60895	0.29978	0.76443	0.54256	0.99964	0.46185	1.1659	0.07127	0.51386	0.24364	0.96437
6430548M08Rik	0.0402	6803	4885	3638	4	0.18644	0.67038	0.47001	0.85205	0.50262	0.99964	0.14624	0.52423	0.83763	0.97282	0.60012	0.97075
6430550D23Rik	0.219192	9254	7524	3211	4	0.21009	0.84856	0.39267	0.81966	0.39613	0.99964	-0.009102	-0.036544	0.62605	0.90187	0.97085	0.99752
6430571L13Rik	0.054408	7010	9227	8913	4	-0.086512	-0.33307	0.46471	0.84892	0.73908	0.99964	-0.14092	-0.54058	0.31456	0.75746	0.5888	0.96993
8030462N17Rik	-0.392267	872	2564	9120	4	-0.099027	-0.36361	0.42924	0.83441	0.71615	0.99964	0.29324	1.0823	0.34738	0.77788	0.27911	0.96437
9030624G23Rik	-0.14446	3621	3640	5788	4	0.07801	0.080763	0.90438	0.97992	0.93563	0.99964	0.22247	0.23035	0.56196	0.87617	0.81782	0.98591
9130008F23Rik	-0.28309	1724	1167	4411	4	0.14422	0.37673	0.6269	0.91723	0.70637	0.99964	0.42731	1.1207	0.10349	0.56013	0.26243	0.96437
9130019O22Rik	-0.02585	5622	10712	11238	4	-0.36582	-1.8342	0.070757	0.51903	0.066625	0.99964	-0.33997	-1.7053	0.1034	0.56013	0.088145	0.96437
9130023H24Rik	-0.3917	876	594	4604	4	0.13454	0.37637	0.66698	0.92883	0.70664	0.99964	0.52624	1.4817	0.033499	0.41762	0.13842	0.96437
9130401M01Rik	0.05206	6974	4922	3468	4	0.19674	0.80006	0.43446	0.83582	0.42367	0.99964	0.14468	0.58716	0.84387	0.97311	0.55709	0.96642
9430015G10Rik	-0.108388	4188	5494	7301	4	0.0043916	0.019715	0.78491	0.95897	0.98427	0.99964	0.11278	0.50602	0.95932	0.99319	0.61284	0.97075
9430038I01Rik	-0.429303	679	1004	6998	4	0.020167	0.070854	0.84797	0.97075	0.94351	0.99964	0.44947	1.5857	0.082379	0.53051	0.1128	0.96437
9530068E07Rik	0.105589	7834	9070	7793	4	-0.020651	-0.12055	0.69048	0.9348	0.90405	0.99964	-0.12624	-0.73442	0.34148	0.77502	0.46269	0.96642
9530077C05Rik	0.132217	8206	6228	3306	4	0.20521	0.73892	0.40557	0.82339	0.45995	0.99964	0.072993	0.26172	0.8948	0.98102	0.79354	0.98507
9930012K11Rik	-0.4053	797	4884	10739	4	-0.25895	-1.234	0.14177	0.61353	0.21722	0.99964	0.14635	0.70069	0.83729	0.97282	0.4835	0.96642
9930111J21Rik1	0.001813	6123	8084	8237	4	-0.044354	-0.21123	0.60383	0.90923	0.83271	0.99964	-0.046167	-0.21948	0.5235	0.86678	0.82627	0.98591
A130010J15Rik	0.04936	6929	4128	2724	4	0.24052	0.87866	0.3032	0.76443	0.37958	0.99964	0.19116	0.69672	0.66826	0.91666	0.48598	0.96642
A430005L14Rik	-0.266888	1909	4093	8703	4	-0.073158	-0.27922	0.50624	0.86913	0.78008	0.99964	0.19373	0.74166	0.6569	0.91058	0.4583	0.96642
A430033K04Rik	0.072893	7304	5946	4104	4	0.16046	0.7763	0.56606	0.89628	0.43757	0.99964	0.087567	0.42267	0.94719	0.98982	0.67253	0.9733
A530032D15Rik	-0.580848	248	6171	11536	4	-0.50503	-0.68755	0.034011	0.41158	0.49174	0.99964	0.075818	0.10772	0.90412	0.98246	0.91422	0.99413
A630001G21Rik	-0.01746	5769	5063	4924	4	0.11849	0.50235	0.73355	0.94523	0.61542	0.99964	0.13595	0.57554	0.87592	0.98021	0.56492	0.96642
AA467197	0.15513	8489	2691	817	4	0.43866	1.386	0.035977	0.41888	0.16574	0.99964	0.28353	0.89093	0.37156	0.7925	0.37296	0.96437
AA986860	-0.162208	3335	3671	6211	4	0.057822	0.26297	0.99333	0.99889	0.79258	0.99964	0.22003	1.0004	0.56922	0.87957	0.31714	0.96437
Aaas	-0.15295	3504	6637	9209	4	-0.1056	-0.4594	0.41164	0.82539	0.64594	0.99964	0.04735	0.20706	0.81046	0.96402	0.83596	0.98591
Aadac	0.21272	9184	10588	9188	4	-0.10401	-0.35381	0.41566	0.82749	0.72348	0.99964	-0.31673	-1.0702	0.1169	0.57966	0.28454	0.96437
Aagab	0.035342	6706	8801	8568	4	-0.065488	-0.23298	0.53196	0.88127	0.81578	0.99964	-0.10083	-0.35724	0.38925	0.80204	0.72091	0.97435
Aak1	0.11654	8001	3355	1335	4	0.35575	1.4647	0.094941	0.56396	0.14301	0.99964	0.23921	0.98222	0.5059	0.8604	0.32599	0.96437
Aamdc	-0.204326	2694	4540	8085	4	-0.036366	-0.12568	0.63399	0.91941	0.89998	0.99964	0.16796	0.58254	0.7562	0.9446	0.5602	0.96642
Aamp	0.07846	7398	11372	11555	4	-0.51885	-1.1618	0.032388	0.40776	0.24531	0.99964	-0.59731	-1.3374	0.032644	0.41738	0.18108	0.96437
Aar2	-0.182757	3015	7131	9960	4	-0.16696	-0.65739	0.27252	0.74498	0.51093	0.99964	0.015797	0.062299	0.70099	0.92711	0.95033	0.9959
Aars	1.01125	11625	11469	1515	4	0.33785	0.72342	0.11442	0.58239	0.46942	0.99964	-0.6734	-1.4004	0.027346	0.41119	0.16141	0.96437
Aars2	-0.03003	5559	1733	1611	4	0.32882	0.80979	0.12699	0.60056	0.41806	0.99964	0.35885	0.8838	0.20193	0.67628	0.37681	0.96437
Aarsd1	0.000566	6104	7762	7871	4	-0.025092	-0.11831	0.67416	0.93078	0.90582	0.99964	-0.025658	-0.12092	0.577	0.88215	0.90375	0.99413
Aasdh	-0.35552	1117	5267	10540	4	-0.23017	-0.71522	0.17416	0.65827	0.47447	0.99964	0.12535	0.39056	0.91104	0.98386	0.69612	0.9733
Aasdhppt	-0.367826	1036	1560	7230	4	0.007884	0.013245	0.79935	0.96244	0.98943	0.99964	0.37571	0.63404	0.17356	0.65889	0.52606	0.96642
Aass	0.16431	8601	7768	4524	4	0.13842	0.629	0.6504	0.92314	0.52935	0.99964	-0.02589	-0.11703	0.57631	0.88215	0.90684	0.99413
Aatf	-0.10023	4298	722	1060	4	0.39544	0.49222	0.061442	0.50103	0.62256	0.99964	0.49567	0.62205	0.04777	0.4616	0.53391	0.96642
Aatk	0.06531	7175	4312	2625	4	0.24613	0.84662	0.28935	0.75987	0.39721	0.99964	0.18082	0.61966	0.70697	0.92747	0.53548	0.96642
AB124611	-0.31667	1392	2587	7874	4	-0.02535	-0.11976	0.67365	0.93078	0.90467	0.99964	0.29132	1.3822	0.35182	0.78062	0.16691	0.96437
Abat	0.360548	10400	8231	1871	4	0.30472	1.2355	0.16501	0.64789	0.21666	0.99964	-0.055828	-0.22459	0.49752	0.85784	0.8223	0.98591
Abca1	-0.114424	4076	6676	8640	4	-0.069634	-0.30944	0.51854	0.87576	0.75699	0.99964	0.04479	0.19897	0.80226	0.9614	0.84229	0.98699
Abca13	0.28712	9899	9110	4153	4	0.15814	0.60105	0.57366	0.89958	0.54781	0.99964	-0.12898	-0.486	0.3361	0.77284	0.62697	0.97075
Abca2	-0.29636	1583	230	1304	4	0.35943	0.66129	0.09101	0.55695	0.50843	0.99964	0.65579	1.215	0.0056401	0.25095	0.22436	0.96437
Abca3	-0.29101	1636	788	3564	4	0.19105	0.67694	0.4536	0.84326	0.49844	0.99964	0.48206	1.7113	0.05529	0.48212	0.087034	0.96437
Abca5	-0.214013	2561	3387	6935	4	0.023137	0.068063	0.85968	0.9723	0.94574	0.99964	0.23715	0.7026	0.51342	0.86436	0.4823	0.96642
Abca6	-0.05721	5028	9026	10080	4	-0.17907	-0.78241	0.24944	0.72356	0.43397	0.99964	-0.12186	-0.53196	0.34985	0.77951	0.59475	0.97075
Abca7	-0.16099	3361	984	2025	4	0.291	0.83978	0.18715	0.6689	0.40103	0.99964	0.45199	1.3055	0.079474	0.52189	0.19173	0.96437
Abca8a	0.26141	9677	8958	4381	4	0.14581	0.59586	0.62194	0.91581	0.55127	0.99964	-0.1156	-0.46923	0.36105	0.78532	0.6389	0.97075
Abca8b	-0.0781392	4673	5962	7213	4	0.0087768	0.032564	0.80337	0.96399	0.97402	0.99964	0.086916	0.32272	0.94471	0.98979	0.74691	0.97744
Abca9	-0.328633	1302	2042	7320	4	0.0036666	0.0151	0.78115	0.95717	0.98795	0.99964	0.3323	1.3718	0.25278	0.71726	0.17014	0.96437
Abcb10	-0.1976	2797	2416	5198	4	0.1053	0.42635	0.79046	0.96056	0.66986	0.99964	0.3029	1.2278	0.32191	0.76367	0.21953	0.96437
Abcb11	-0.260703	1984	2020	5888	4	0.073617	0.29986	0.92189	0.98198	0.76428	0.99964	0.33432	1.3673	0.2491	0.71411	0.17153	0.96437
Abcb1a	-0.30579	1493	5210	10057	4	-0.1769	-0.68652	0.25295	0.72665	0.49238	0.99964	0.12889	0.50144	0.89848	0.98125	0.61606	0.97075
Abcb1b	-0.04978	5179	1301	1321	4	0.35754	1.3354	0.092719	0.56066	0.18175	0.99964	0.40732	1.5207	0.1281	0.59912	0.12833	0.96437
Abcb4	-0.588748	238	7958	11628	4	-0.62711	-2.6251	0.024697	0.37827	0.0086622	0.99964	-0.038362	-0.16275	0.54273	0.87119	0.87071	0.9911
Abcb6	-0.323693	1344	7318	11073	4	-0.31949	-1.1925	0.094856	0.56396	0.23308	0.99964	0.0042026	0.015799	0.66459	0.91483	0.9874	0.99847
Abcb7	0.36608	10436	11229	9619	4	-0.1373	-0.25828	0.33293	0.78343	0.79619	0.99964	-0.50338	-0.9344	0.04512	0.4509	0.3501	0.96437
Abcb9	-0.05542	5062	9845	10738	4	-0.25885	-1.0031	0.14177	0.61353	0.31581	0.99964	-0.20343	-0.78867	0.22048	0.6973	0.43031	0.96642
Abcc1	-0.124813	3929	7838	9838	4	-0.15545	-0.67139	0.29525	0.76219	0.50197	0.99964	-0.030637	-0.13254	0.56238	0.87618	0.89455	0.99335
Abcc10	-0.26392	1937	514	2111	4	0.28446	0.7963	0.20039	0.68467	0.42586	0.99964	0.54838	1.5374	0.024355	0.41119	0.12419	0.96437
Abcc2	0.12766	8152	5511	2743	4	0.23922	1.1435	0.30619	0.76658	0.25284	0.99964	0.11156	0.5315	0.96274	0.99418	0.59507	0.97075
Abcc3	-0.001521	6061	7014	6971	4	0.021048	0.094537	0.85139	0.97089	0.92468	0.99964	0.022569	0.10119	0.72483	0.93368	0.9194	0.99432
Abcc4	-0.04881	5195	2918	3055	4	0.2192	0.84226	0.36387	0.80045	0.39964	0.99964	0.26801	1.029	0.416	0.81201	0.3035	0.96437
Abcc5	0.276489	9796	9852	5918	4	0.072209	0.26659	0.92882	0.98433	0.78979	0.99964	-0.20428	-0.74941	0.21885	0.69517	0.45361	0.96642
Abcd2	0.46598	10930	9577	2030	4	0.29086	1.3302	0.18732	0.6689	0.18346	0.99964	-0.17512	-0.79332	0.25884	0.72136	0.42759	0.96642
Abcd3	-0.133483	3790	5612	7910	4	-0.027313	-0.12207	0.66578	0.92849	0.90285	0.99964	0.10617	0.47428	0.98197	0.99758	0.6353	0.97075
Abcd4	0.45418	10877	64	4	4	1.3237	1.2609	0	0	0.20733	0.99964	0.86952	0.81502	0	0	0.41506	0.96642
Abce1	0.208982	9143	8514	4692	4	0.13019	0.35263	0.68364	0.93295	0.72436	0.99964	-0.078792	-0.21154	0.43719	0.82198	0.83247	0.98591
Abcf1	0.158266	8534	10178	8934	4	-0.087614	-0.224	0.4618	0.84782	0.82276	0.99964	-0.24588	-0.62367	0.1745	0.65936	0.53284	0.96642
Abcf2	-0.039132	5380	5192	5522	4	0.090638	0.34818	0.84943	0.97082	0.72771	0.99964	0.12977	0.49817	0.89515	0.98102	0.61836	0.97075
Abcf3	0.467681	10934	8037	879	4	0.42426	1.1188	0.042984	0.45414	0.26322	0.99964	-0.043421	-0.11277	0.52999	0.86766	0.91022	0.99413
Abcg1	-0.09574	4374	2090	2841	4	0.23289	0.8611	0.32294	0.77762	0.38918	0.99964	0.32863	1.2144	0.26166	0.72248	0.2246	0.96437
Abcg2	-0.037588	5413	5977	6416	4	0.048432	0.19944	0.96607	0.99455	0.84192	0.99964	0.08602	0.35358	0.94112	0.98923	0.72366	0.97435
Abcg4	0.00252	6137	3280	2614	4	0.24684	1.0775	0.28747	0.75743	0.28127	0.99964	0.24432	1.0642	0.48667	0.84911	0.28725	0.96437
Abhd10	-0.245599	2177	6169	9989	4	-0.16975	-0.73497	0.26705	0.7416	0.46236	0.99964	0.075849	0.32875	0.90412	0.98246	0.74235	0.97659
Abhd11	-0.17869	3079	4859	7962	4	-0.03022	-0.12724	0.65561	0.92472	0.89875	0.99964	0.14847	0.62566	0.82892	0.96864	0.53153	0.96642
Abhd12	0.04759	6891	5419	4024	4	0.16426	0.72521	0.55273	0.89086	0.46833	0.99964	0.11667	0.51409	0.94326	0.98933	0.60719	0.97075
Abhd13	-0.17186	3182	1750	3666	4	0.18484	0.72056	0.47462	0.85361	0.47118	0.99964	0.3567	1.3906	0.20586	0.68147	0.16433	0.96437
Abhd14a	-0.20948	2620	3915	7512	4	-0.0059903	-0.025814	0.74355	0.94646	0.97941	0.99964	0.20349	0.87807	0.62237	0.90158	0.37991	0.96437
Abhd14b	-0.15391	3495	6468	9066	4	-0.095557	-0.4107	0.43804	0.83689	0.6813	0.99964	0.058353	0.25116	0.84738	0.97465	0.80169	0.98555
Abhd15	-0.14918	3547	2854	4838	4	0.12264	0.5418	0.71637	0.94263	0.58796	0.99964	0.27182	1.2005	0.40455	0.80828	0.22996	0.96437
Abhd16a	-0.33418	1264	3608	9266	4	-0.11011	-0.52035	0.4007	0.82207	0.60282	0.99964	0.22407	1.0637	0.55597	0.87513	0.28745	0.96437
Abhd17a	0.06839	7234	8884	8145	4	-0.03963	-0.2347	0.62229	0.91581	0.81444	0.99964	-0.10802	-0.6376	0.37524	0.79425	0.52373	0.96642
Abhd17b	0.241725	9482	7937	3316	4	0.2046	0.85632	0.40796	0.82539	0.39182	0.99964	-0.037125	-0.1546	0.54555	0.87165	0.87713	0.99169
Abhd17c	0.14453	8356	4202	1585	4	0.33098	1.0894	0.12391	0.59549	0.27599	0.99964	0.18645	0.61121	0.68655	0.92281	0.54106	0.96642
Abhd18	-0.0287395	5575	7274	7809	4	-0.021393	-0.12583	0.68792	0.93442	0.89987	0.99964	0.0073465	0.043161	0.67296	0.91698	0.96557	0.99685
Abhd2	0.000436	6099	6206	5866	4	0.074518	0.26171	0.91788	0.98118	0.79354	0.99964	0.074082	0.25995	0.8978	0.98125	0.7949	0.98507
Abhd3	-0.03456	5470	456	407	4	0.53166	1.5466	0.0098274	0.27845	0.12197	0.99964	0.56622	1.6457	0.018886	0.39928	0.099818	0.96437
Abhd4	-0.044469	5265	8117	9027	4	-0.093314	-0.41679	0.44411	0.83958	0.67683	0.99964	-0.048845	-0.21775	0.51675	0.86447	0.82762	0.98591
Abhd5	-0.157034	3438	4571	7212	4	0.0089455	0.03328	0.80414	0.96399	0.97345	0.99964	0.16598	0.61772	0.76354	0.94761	0.53676	0.96642
Abhd6	-0.05302	5111	2596	2767	4	0.23751	0.59905	0.3102	0.76917	0.54914	0.99964	0.29053	0.73395	0.35387	0.78117	0.46298	0.96642
Abhd8	-0.10149	4274	2289	3199	4	0.21075	0.74141	0.39104	0.8189	0.45844	0.99964	0.31224	1.0976	0.29841	0.74914	0.27237	0.96437
Abi1	-0.241127	2232	4270	8467	4	-0.058277	-0.28045	0.55384	0.89086	0.77913	0.99964	0.18285	0.88168	0.70005	0.92711	0.37795	0.96437
Abi3	-0.452446	583	1664	8922	4	-0.087056	-0.33064	0.4636	0.84832	0.74091	0.99964	0.36539	1.3994	0.19116	0.67298	0.1617	0.96437
Abitram	0.01119	6284	10939	11319	4	-0.38768	-1.4369	0.062212	0.50103	0.15076	0.99964	-0.39887	-1.4783	0.076397	0.52041	0.13933	0.96437
Abl1	0.329202	10205	7770	1882	4	0.30325	1.2255	0.16724	0.65029	0.22039	0.99964	-0.025952	-0.10402	0.57623	0.88215	0.91716	0.99432
Abl2	0.01048	6272	4143	3393	4	0.20099	0.68948	0.42036	0.82968	0.49052	0.99964	0.19051	0.65124	0.67065	0.91698	0.51489	0.96642
Ablim3	-0.19814	2781	9112	11104	4	-0.32724	-1.7324	0.090326	0.55695	0.083196	0.99964	-0.1291	-0.68446	0.33601	0.7728	0.49368	0.96642
Abr	-0.05741	5026	10923	11474	4	-0.45256	-1.9115	0.043155	0.45414	0.055935	0.99964	-0.39515	-1.666	0.078021	0.52189	0.095708	0.96437
Abracl	0.186387	8896	7018	3238	4	0.20871	1.0136	0.39677	0.82162	0.31078	0.99964	0.022323	0.10792	0.72398	0.93368	0.91406	0.99413
Abraxas1	-0.30165	1531	1268	5116	4	0.10977	0.34789	0.77218	0.95563	0.72793	0.99964	0.41142	1.3085	0.12194	0.5904	0.19069	0.96437
Abraxas2	0.007086	6213	8246	8336	4	-0.049894	-0.18658	0.58306	0.9018	0.85199	0.99964	-0.05698	-0.21268	0.49368	0.85545	0.83158	0.98591
Abt1	0.463409	10915	7366	690	4	0.46437	0.85354	0.025038	0.38151	0.39336	0.99964	0.00096104	0.0017308	0.65485	0.91	0.99862	0.99981
Abtb1	0.140039	8296	8841	6662	4	0.035859	0.16856	0.9113	0.97992	0.86615	0.99964	-0.10418	-0.48732	0.38267	0.79864	0.62603	0.97075
Abtb2	-0.271969	1851	5796	10032	4	-0.17502	-0.61363	0.25628	0.72951	0.53946	0.99964	0.096949	0.342	0.98308	0.99758	0.73235	0.97535
Acaa1a	-0.08755	4516	1680	2215	4	0.27627	1.0103	0.21808	0.70043	0.31233	0.99964	0.36382	1.3298	0.19467	0.67414	0.18357	0.96437
Acaa1b	0.09527	7665	11352	11514	4	-0.48547	-1.5951	0.036404	0.41888	0.1107	0.99964	-0.58074	-1.9053	0.034097	0.41762	0.056747	0.96437
Acaa2	-0.246176	2172	8018	10904	4	-0.28813	-1.0691	0.11588	0.58398	0.28503	0.99964	-0.041954	-0.1565	0.5341	0.86988	0.87564	0.99169
Acaca	-0.357294	1098	7757	11298	4	-0.38272	-1.5241	0.06375	0.50268	0.12748	0.99964	-0.025426	-0.10197	0.57802	0.88291	0.91878	0.99432
Acacb	-0.238924	2260	3981	8138	4	-0.039404	-0.18291	0.6228	0.91581	0.85487	0.99964	0.19952	0.92754	0.63536	0.90538	0.35365	0.96437
Acad11	-0.29507	1598	874	3885	4	0.17239	0.61847	0.52239	0.87704	0.53627	0.99964	0.46746	1.6802	0.066228	0.50812	0.092924	0.96437
Acad8	0.175444	8747	9025	6302	4	0.053634	0.1955	0.98872	0.99759	0.845	0.99964	-0.12181	-0.44153	0.34994	0.77955	0.65883	0.97206
Acad9	-0.491645	446	726	7347	4	0.002815	0.0090084	0.77722	0.95705	0.99281	0.99964	0.49446	1.5883	0.048197	0.46305	0.11222	0.96437
Acadl	-0.14224	3666	2845	4695	4	0.13015	0.42009	0.68373	0.93295	0.67442	0.99964	0.27239	0.88012	0.40241	0.80772	0.3788	0.96437
Acadm	-0.200605	2742	8050	10643	4	-0.24484	-0.97275	0.15596	0.63302	0.33068	0.99964	-0.044235	-0.17586	0.5282	0.86744	0.86041	0.98897
Acads	-0.068826	4809	5139	6090	4	0.063164	0.25172	0.96889	0.99526	0.80126	0.99964	0.13199	0.52595	0.88746	0.98102	0.59892	0.97075
Acadsb	-0.03593	5445	415	370	4	0.54461	1.5827	0.0085455	0.26385	0.1135	0.99964	0.58054	1.6845	0.016066	0.38134	0.09209	0.96437
Acadvl	-0.4055	796	4689	10659	4	-0.24685	-0.86269	0.15331	0.62837	0.38831	0.99964	0.15865	0.55652	0.79115	0.95831	0.57786	0.96759
Acap1	0.0085193	6244	7233	7026	4	0.018273	0.083551	0.84165	0.97049	0.93341	0.99964	0.0097537	0.044539	0.68005	0.91927	0.96447	0.99685
Acap2	-0.37273	989	228	2119	4	0.28396	0.68211	0.20133	0.68508	0.49517	0.99964	0.65669	1.5855	0.0056401	0.25095	0.11285	0.96437
Acap3	-0.17489	3143	9925	11335	4	-0.39029	-1.4923	0.061015	0.50103	0.13562	0.99964	-0.2154	-0.82566	0.20415	0.6785	0.409	0.96642
Acat1	-0.03413	5481	5081	5286	4	0.10108	0.45738	0.80704	0.96399	0.6474	0.99964	0.13521	0.61085	0.87806	0.98021	0.5413	0.96642
Acat2	0.12087	8056	10646	10355	4	-0.20641	-0.78933	0.20543	0.68832	0.42992	0.99964	-0.32728	-1.2451	0.11024	0.56923	0.21308	0.96437
Acat3	0.05855	7076	3950	2439	4	0.25999	0.80113	0.25568	0.72851	0.42305	0.99964	0.20144	0.61861	0.62844	0.9027	0.53617	0.96642
Acbd3	0.33484	10232	3312	296	4	0.57691	1.3485	0.0058964	0.22581	0.17748	0.99964	0.24207	0.56063	0.49701	0.85744	0.57505	0.96759
Acbd4	-0.076161	4702	7040	8423	4	-0.055343	-0.24885	0.56495	0.89628	0.80347	0.99964	0.020818	0.093545	0.71817	0.93109	0.92547	0.99432
Acbd5	-0.30008	1544	572	2873	4	0.23037	0.60246	0.33011	0.78246	0.54687	0.99964	0.53045	1.3922	0.031875	0.41685	0.16387	0.96437
Acbd6	-0.60267	218	3639	11290	4	-0.38016	-1.1623	0.064775	0.50496	0.24513	0.99964	0.22251	0.68522	0.56187	0.87617	0.49321	0.96642
Accs	0.151654	8448	6748	3538	4	0.19234	0.83891	0.4495	0.84257	0.40152	0.99964	0.040686	0.17668	0.78687	0.95668	0.85976	0.98883
Acd	0.360013	10397	7890	1640	4	0.32647	0.89172	0.12989	0.6027	0.37255	0.99964	-0.033543	-0.090368	0.55401	0.8749	0.92799	0.99454
Acer3	-0.0784615	4665	6142	7409	4	-0.00098753	-0.0053163	0.76346	0.95286	0.99576	0.99964	0.077474	0.41655	0.9101	0.98386	0.67701	0.9733
Acin1	0.066965	7210	8044	6938	4	0.022947	0.063557	0.85883	0.9723	0.94932	0.99964	-0.044018	-0.12156	0.52888	0.86749	0.90324	0.99413
Acly	-0.37981	938	4632	10439	4	-0.21779	-0.6318	0.19014	0.67282	0.52752	0.99964	0.16202	0.47101	0.77867	0.95297	0.63763	0.97075
Aco1	-0.236765	2286	3374	7368	4	0.0013049	0.0063408	0.77149	0.95555	0.99494	0.99964	0.23807	1.1604	0.51	0.8628	0.2459	0.96437
Aco2	0.322971	10157	5881	952	4	0.41427	0.52004	0.048197	0.46573	0.60304	0.99964	0.091299	0.11322	0.96291	0.99418	0.90986	0.99413
Acod1	0.169765	8674	9787	7914	4	-0.027485	-0.12995	0.66519	0.92844	0.89661	0.99964	-0.19725	-0.92798	0.22825	0.70238	0.35342	0.96437
Acot1	-0.26445	1929	4340	8901	4	-0.08559	-0.39241	0.4671	0.85112	0.69475	0.99964	0.17886	0.82163	0.71501	0.93043	0.41129	0.96642
Acot13	-0.042534	5305	8610	9516	4	-0.12936	-0.42426	0.35199	0.79671	0.67138	0.99964	-0.086826	-0.28445	0.41839	0.81267	0.77607	0.98203
Acot2	-0.53552	333	2369	10534	4	-0.22882	-1.247	0.17604	0.66014	0.21239	0.99964	0.3067	1.6796	0.31183	0.75579	0.093029	0.96437
Acot4	0.17253	8719	4336	1372	4	0.35179	1.5793	0.099385	0.57006	0.11426	0.99964	0.17926	0.80111	0.71321	0.9295	0.42307	0.96642
Acot7	-0.0607	4967	3418	3844	4	0.17455	0.7259	0.51342	0.87326	0.4679	0.99964	0.23525	0.97818	0.5188	0.86454	0.32798	0.96437
Acot8	0.060861	7102	8075	7094	4	0.015104	0.053196	0.8296	0.97012	0.95758	0.99964	-0.045757	-0.16045	0.52453	0.86678	0.87252	0.99169
Acot9	0.446801	10852	7183	712	4	0.4595	1.0254	0.027004	0.38631	0.30518	0.99964	0.012699	0.02801	0.69039	0.92413	0.97765	0.9982
Acox1	0.666	11389	10727	1677	4	0.32377	1.0583	0.13391	0.60398	0.2899	0.99964	-0.34223	-1.1	0.10212	0.56013	0.27135	0.96437
Acox2	-0.181117	3041	4502	7616	4	-0.011427	-0.049172	0.72338	0.94381	0.96078	0.99964	0.16969	0.73062	0.74979	0.94324	0.46501	0.96642
Acox3	-0.291197	1632	5835	10270	4	-0.19699	-0.90873	0.21902	0.70043	0.36349	0.99964	0.094207	0.43525	0.97394	0.99624	0.66338	0.97301
Acoxl	0.127055	8142	5748	2940	4	0.22625	0.85865	0.34182	0.78833	0.39053	0.99964	0.099195	0.37497	0.99051	0.99785	0.70768	0.97373
Acp1	0.58658	11237	11566	10475	4	-0.22238	-0.78519	0.18399	0.66687	0.43234	0.99964	-0.80896	-2.8067	0.022218	0.41119	0.0050047	0.88889
Acp2	0.00602	6191	5153	4544	4	0.13751	0.53804	0.65416	0.92441	0.59055	0.99964	0.13149	0.51317	0.88925	0.98102	0.60783	0.97075
Acp5	0.03196	6648	3865	2756	4	0.23831	0.90295	0.30832	0.76848	0.36655	0.99964	0.20635	0.7805	0.61357	0.89795	0.43509	0.96642
Acp6	0.242114	9485	5884	1553	4	0.33325	0.89306	0.12092	0.59389	0.37182	0.99964	0.091136	0.24269	0.96266	0.99418	0.80825	0.98555
Acpp	-0.51259	393	1599	9661	4	-0.14061	-0.5911	0.32712	0.78091	0.55446	0.99964	0.37198	1.5728	0.1798	0.66237	0.11577	0.96437
Acrbp	-0.345703	1176	3203	9078	4	-0.096293	-0.4061	0.43582	0.83582	0.68467	0.99964	0.24941	1.0571	0.47206	0.84194	0.29047	0.96437
Acsbg1	0.235893	9425	9697	6414	4	0.048523	0.26611	0.96642	0.99455	0.79015	0.99964	-0.18737	-1.0217	0.24201	0.71124	0.30694	0.96437
Acsbg3	0.027034	6569	5914	4985	4	0.11652	0.45139	0.7409	0.94612	0.65171	0.99964	0.089486	0.34651	0.9565	0.99308	0.72896	0.97458
Acsf2	-0.154606	3479	3258	5501	4	0.091424	0.3509	0.84669	0.97075	0.72567	0.99964	0.24603	0.94526	0.48137	0.84503	0.34453	0.96437
Acsf3	-0.015143	5805	6611	6698	4	0.034165	0.1047	0.90344	0.97992	0.91661	0.99964	0.049308	0.15123	0.81619	0.96494	0.8798	0.99169
Acsl1	0.318593	10124	7306	1679	4	0.3237	0.91307	0.13425	0.60398	0.36121	0.99964	0.0051071	0.014275	0.66715	0.91621	0.98861	0.99847
Acsl3	0.056475	7038	8416	7684	4	-0.014867	-0.064289	0.71125	0.94166	0.94874	0.99964	-0.071342	-0.30735	0.45514	0.83195	0.75858	0.97906
Acsl4	0.485216	10986	7813	726	4	0.45591	1.0346	0.0282	0.39452	0.30087	0.99964	-0.029306	-0.065506	0.56666	0.87819	0.94777	0.9959
Acsl5	0.024029	6509	5735	4813	4	0.1239	0.45589	0.71073	0.94166	0.64847	0.99964	0.099871	0.36691	0.99299	0.99785	0.71369	0.97403
Acsm1	-0.24803	2150	444	1694	4	0.32197	0.87556	0.1369	0.60758	0.38127	0.99964	0.57	1.5534	0.018287	0.39411	0.12033	0.96437
Acsm3	-0.294702	1602	2154	6827	4	0.028378	0.094482	0.87891	0.97683	0.92473	0.99964	0.32308	1.0799	0.27337	0.73053	0.28017	0.96437
Acss1	-0.120861	3974	5337	7384	4	0.00063869	0.0030685	0.76893	0.9548	0.99755	0.99964	0.1215	0.58372	0.92454	0.98633	0.55941	0.96642
Acss2	0.02928	6600	4057	2959	4	0.22511	0.93835	0.3443	0.78923	0.34807	0.99964	0.19583	0.81378	0.64869	0.90704	0.41577	0.96642
Acta2	-0.160933	3362	5383	8189	4	-0.041963	-0.18022	0.61203	0.91219	0.85698	0.99964	0.11897	0.51119	0.93428	0.98762	0.60922	0.97075
Actb	0.59242	11246	3560	70	4	0.81884	1.2779	0.00017091	0.022727	0.20129	0.99964	0.22642	0.34671	0.54717	0.87306	0.72881	0.97458
Actg1	0.48538	10987	10710	4379	4	0.14582	0.4712	0.62169	0.91581	0.6375	0.99964	-0.33956	-1.0785	0.10349	0.56013	0.28082	0.96437
Actl6a	1.51189	11695	11631	425	4	0.52818	0.75726	0.010511	0.28406	0.4489	0.99964	-0.98371	-1.3165	0.014527	0.36617	0.188	0.96437
Actn1	-0.07776	4679	9018	10289	4	-0.19896	-1.2188	0.2162	0.70043	0.22293	0.99964	-0.1212	-0.74128	0.35071	0.77968	0.45852	0.96642
Actn3	0.262023	9684	10047	6735	4	0.032503	0.13275	0.8966	0.97873	0.89439	0.99964	-0.22952	-0.93043	0.19057	0.67289	0.35215	0.96437
Actn4	-0.342372	1203	2229	7886	4	-0.025922	-0.099122	0.67117	0.93057	0.92104	0.99964	0.31645	1.2144	0.28833	0.74235	0.22461	0.96437
Actr10	0.288385	9912	6343	1343	4	0.35423	1.0471	0.096479	0.56848	0.29505	0.99964	0.065845	0.19257	0.87207	0.97937	0.8473	0.98707
Actr1a	0.01379	6339	2969	2179	4	0.2788	1.246	0.21244	0.69668	0.21278	0.99964	0.26501	1.1812	0.42506	0.81577	0.23754	0.96437
Actr1b	0.153671	8474	8401	5661	4	0.083672	0.30008	0.88139	0.97782	0.76412	0.99964	-0.069999	-0.24962	0.45881	0.83357	0.80288	0.98555
Actr2	0.33338	10225	11328	10517	4	-0.2275	-0.30064	0.17749	0.66014	0.76369	0.99964	-0.56088	-0.7307	0.036404	0.41762	0.46496	0.96642
Actr3	0.395999	10595	6569	771	4	0.44744	1.1859	0.032131	0.40776	0.23568	0.99964	0.051441	0.13442	0.82353	0.96604	0.89307	0.99313
Actr3b	-0.053864	5096	6384	7202	4	0.009494	0.035051	0.80627	0.96399	0.97204	0.99964	0.063358	0.23338	0.86378	0.97833	0.81546	0.98591
Actr5	-0.213988	2562	2778	6087	4	0.063252	0.1601	0.96838	0.99526	0.8728	0.99964	0.27724	0.70454	0.38951	0.80204	0.4811	0.96642
Actr6	0.102882	7791	9171	7996	4	-0.032338	-0.062655	0.64801	0.92314	0.95004	0.99964	-0.13522	-0.26112	0.3249	0.76513	0.794	0.98507
Actr8	-0.22722	2405	1654	4516	4	0.13871	0.38185	0.64955	0.92314	0.70257	0.99964	0.36593	1.0073	0.19031	0.67289	0.31381	0.96437
Acvr1	-0.204832	2682	6999	10113	4	-0.1813	-0.87846	0.24534	0.72281	0.37969	0.99964	0.023532	0.11403	0.728	0.9344	0.90922	0.99413
Acvr1b	0.03872	6775	4386	3123	4	0.21491	0.7531	0.37754	0.81006	0.45139	0.99964	0.17619	0.61577	0.72398	0.93368	0.53804	0.96642
Acvr2a	0.77751	11515	10791	909	4	0.41932	1.263	0.045462	0.45969	0.20658	0.99964	-0.35819	-1.0599	0.094599	0.55291	0.2892	0.96437
Acvr2b	-0.08064	4630	8295	9674	4	-0.14186	-0.5922	0.3243	0.77828	0.55372	0.99964	-0.06122	-0.25527	0.4818	0.8454	0.79851	0.98555
Acvrl1	0.04004	6801	3958	2708	4	0.24117	1.0234	0.30166	0.76443	0.3061	0.99964	0.20113	0.85177	0.62929	0.9027	0.39434	0.96437
Acy1	-0.19519	2835	2307	5005	4	0.11581	0.48369	0.74457	0.94646	0.62861	0.99964	0.311	1.3002	0.30106	0.74968	0.19354	0.96437
Acy3	0.11907	8030	5348	2733	4	0.23996	1.0525	0.30414	0.76521	0.29258	0.99964	0.12089	0.52755	0.92659	0.98653	0.59781	0.97075
Acyp1	-0.06346	4915	4228	4866	4	0.12145	0.48564	0.72124	0.94381	0.62722	0.99964	0.18491	0.73956	0.6927	0.92545	0.45957	0.96642
Acyp2	-0.288581	1659	1787	6054	4	0.065129	0.22558	0.95984	0.99258	0.82152	0.99964	0.35371	1.2321	0.21099	0.68583	0.2179	0.96437
Ada	-0.046668	5228	5684	6241	4	0.056412	0.22995	0.99991	0.99991	0.81813	0.99964	0.10308	0.42026	0.99385	0.99794	0.67429	0.9733
Adal	0.02864	6589	10928	11243	4	-0.36766	-1.3755	0.07033	0.51791	0.16897	0.99964	-0.3963	-1.481	0.077337	0.52041	0.13862	0.96437
Adam10	0.08671	7518	10945	11047	4	-0.31365	-0.69567	0.098017	0.57006	0.48663	0.99964	-0.40036	-0.88316	0.075884	0.52041	0.37715	0.96437
Adam15	0.11958	8038	4124	1809	4	0.3111	1.0905	0.15331	0.62837	0.2755	0.99964	0.19152	0.66901	0.66681	0.91595	0.50349	0.96642
Adam17	-0.550325	301	786	8610	4	-0.067575	-0.18085	0.52572	0.87995	0.85649	0.99964	0.48275	1.3065	0.055119	0.48212	0.19139	0.96437
Adam1a	0.26329	9695	8848	4156	4	0.15805	0.7202	0.57392	0.89958	0.4714	0.99964	-0.10524	-0.47623	0.38088	0.79689	0.63391	0.97075
Adam22	0.14037	8298	5067	2219	4	0.27614	1.0683	0.21851	0.70043	0.28541	0.99964	0.13577	0.52275	0.87652	0.98021	0.60115	0.97075
Adam3	0.203908	9086	6023	2071	4	0.28766	1.13	0.19347	0.67581	0.25846	0.99964	0.083752	0.32769	0.93223	0.98725	0.74315	0.97664
Adam33	-0.198843	2770	6075	9365	4	-0.11767	-0.48486	0.3784	0.8101	0.62777	0.99964	0.081173	0.33445	0.92292	0.98595	0.73804	0.97614
Adam4	0.19452	8989	4366	1206	4	0.3719	1.3435	0.080585	0.54498	0.17911	0.99964	0.17738	0.63798	0.71936	0.93171	0.52349	0.96642
Adam9	-0.457154	571	1107	7840	4	-0.023564	-0.086969	0.67954	0.93147	0.9307	0.99964	0.43359	1.6089	0.097248	0.55377	0.10763	0.96437
Adamts1	-0.192653	2874	7511	10307	4	-0.20089	-1.1737	0.21347	0.69668	0.24051	0.99964	-0.0082368	-0.04816	0.62844	0.9027	0.96159	0.99672
Adamts10	-0.53642	331	2676	10686	4	-0.25192	-0.73431	0.14715	0.61698	0.46276	0.99964	0.2845	0.83593	0.36908	0.79214	0.40319	0.96437
Adamts14	-0.186923	2970	2899	5684	4	0.082807	0.43498	0.88481	0.97808	0.66358	0.99964	0.26973	1.4178	0.41147	0.80938	0.15624	0.96437
Adamts4	-0.171714	3186	3123	5691	4	0.082536	0.30543	0.88583	0.97811	0.76004	0.99964	0.25425	0.94106	0.45736	0.83349	0.34668	0.96437
Adamts6	0.2828	9852	11598	11610	4	-0.59401	-2.0332	0.026235	0.38356	0.042036	0.99964	-0.87681	-2.9798	0.019484	0.40141	0.0028845	0.79993
Adamtsl4	-0.05284	5118	1411	1499	4	0.33925	1.2149	0.11229	0.58239	0.22441	0.99964	0.39209	1.4015	0.15006	0.6358	0.16106	0.96437
Adamtsl5	0.104923	7823	7374	5196	4	0.10537	0.50805	0.78995	0.96053	0.61142	0.99964	0.00044667	0.0021465	0.65339	0.9097	0.99829	0.99957
Adap1	0.154481	8484	6908	3677	4	0.18409	0.88355	0.47641	0.85414	0.37694	0.99964	0.029609	0.14156	0.74825	0.94242	0.88743	0.99212
Adap2	-0.09849	4324	2716	3690	4	0.18328	0.60648	0.47906	0.85549	0.54419	0.99964	0.28177	0.93236	0.37643	0.79441	0.35115	0.96437
Adar	-0.51206	396	270	4780	4	0.12593	0.40433	0.70347	0.94034	0.68597	0.99964	0.63799	2.0601	0.0065801	0.25246	0.039389	0.96437
Adarb1	0.00392	6152	6760	6502	4	0.043595	0.16768	0.94403	0.98722	0.86683	0.99964	0.039675	0.15222	0.78346	0.95531	0.87902	0.99169
Adat1	0.178803	8798	9951	8126	4	-0.038897	-0.14952	0.62391	0.91583	0.88114	0.99964	-0.2177	-0.83205	0.20159	0.67612	0.40538	0.96437
Adat2	-0.1978	2789	9910	11395	4	-0.41055	-0.90644	0.054435	0.48663	0.3647	0.99964	-0.21275	-0.47642	0.20706	0.68252	0.63377	0.97075
Adat3	0.71287	11454	10964	1837	4	0.3078	0.91931	0.15929	0.63936	0.35793	0.99964	-0.40507	-1.1829	0.074261	0.5181	0.23684	0.96437
Adck1	0.076065	7358	6890	5169	4	0.10711	0.47002	0.782	0.95753	0.63834	0.99964	0.031045	0.13584	0.75209	0.9438	0.89195	0.99313
Adck2	0.273702	9776	10610	8284	4	-0.046798	-0.19339	0.59332	0.9051	0.84665	0.99964	-0.3205	-1.3141	0.11477	0.57633	0.18883	0.96437
Adck5	0.140804	8303	8372	5882	4	0.073941	0.30965	0.91993	0.98141	0.75683	0.99964	-0.066863	-0.27889	0.46616	0.83781	0.78033	0.98213
Adcy2	0.04071	6809	9132	8970	4	-0.08997	-0.37371	0.45462	0.84374	0.70862	0.99964	-0.13068	-0.54089	0.33276	0.77104	0.58858	0.96993
Adcy3	0.449758	10861	11099	7243	4	0.007358	0.024372	0.7973	0.96205	0.98056	0.99964	-0.4424	-1.4473	0.060673	0.49275	0.14781	0.96437
Adcy6	-0.438328	642	650	5897	4	0.073332	0.2304	0.92369	0.98255	0.81778	0.99964	0.51166	1.6212	0.038199	0.42545	0.10498	0.96437
Adcy7	0.476315	10963	6766	473	4	0.51568	2.0169	0.012306	0.29752	0.043711	0.99964	0.039365	0.15292	0.78192	0.95462	0.87846	0.99169
Adcy9	-0.11873	4001	1321	2094	4	0.28584	1.0618	0.1974	0.68021	0.28833	0.99964	0.40457	1.5018	0.13177	0.60486	0.13316	0.96437
Add1	-0.173429	3161	4154	7066	4	0.016561	0.092229	0.83601	0.97043	0.92652	0.99964	0.18999	1.0596	0.67228	0.91698	0.28932	0.96437
Add3	0.12698	8140	4815	2191	4	0.27811	1.0867	0.21398	0.69749	0.27715	0.99964	0.15113	0.58815	0.81824	0.96561	0.55643	0.96642
Adgb	0.34746	10315	9783	4295	4	0.15074	0.51488	0.60195	0.9082	0.60664	0.99964	-0.19672	-0.66612	0.22885	0.70238	0.50534	0.96642
Adgra2	-0.212846	2578	5753	9322	4	-0.1139	-0.17112	0.38848	0.81751	0.86413	0.99964	0.098946	0.14903	0.98957	0.99785	0.88153	0.99186
Adgrb2	-0.17121	3190	938	2080	4	0.28699	1.2097	0.19492	0.67726	0.22639	0.99964	0.4582	1.9315	0.074432	0.5181	0.05342	0.96437
Adgre1	-0.28516	1701	463	2179	4	0.2788	0.77764	0.21244	0.69668	0.43678	0.99964	0.56396	1.5788	0.019826	0.40489	0.11439	0.96437
Adgre5	-0.06648	4859	3107	3604	4	0.18895	0.6651	0.46043	0.84664	0.50599	0.99964	0.25543	0.89829	0.45394	0.83195	0.36903	0.96437
Adgrf3	-0.1447	3615	1547	2857	4	0.23208	1.1532	0.32559	0.77914	0.24882	0.99964	0.37678	1.8732	0.17211	0.65839	0.061039	0.96437
Adgrg1	-0.277629	1785	2574	7097	4	0.014961	0.058651	0.82866	0.9698	0.95323	0.99964	0.29259	1.1498	0.34883	0.77931	0.25021	0.96437
Adgrg6	0.13897	8285	8845	6699	4	0.03413	0.15671	0.90318	0.97988	0.87548	0.99964	-0.10484	-0.47982	0.38156	0.79754	0.63136	0.97075
Adgrl1	0.29677	9977	11076	9629	4	-0.13783	-0.53078	0.33217	0.78343	0.59557	0.99964	-0.4346	-1.6595	0.063152	0.49966	0.097016	0.96437
Adgrl2	-0.13567	3746	2192	3680	4	0.18378	0.60922	0.47753	0.85483	0.54238	0.99964	0.31945	1.059	0.28089	0.73504	0.2896	0.96437
Adh1	-0.04201	5322	4940	5270	4	0.10169	0.45945	0.80491	0.96399	0.64591	0.99964	0.1437	0.6479	0.84763	0.97465	0.51705	0.96642
Adh4	0.00833	6236	5627	5045	4	0.11349	0.42185	0.75526	0.94994	0.67313	0.99964	0.10516	0.39005	0.98573	0.99758	0.6965	0.9733
Adh5	-0.32516	1330	614	3491	4	0.19552	0.70392	0.43881	0.83689	0.48148	0.99964	0.52068	1.8804	0.034866	0.41762	0.060048	0.96437
Adhfe1	0.319357	10128	10092	5649	4	0.084317	0.32455	0.8778	0.97682	0.74552	0.99964	-0.23504	-0.89687	0.18416	0.66718	0.36979	0.96437
Adi1	-0.06834	4823	10530	11267	4	-0.37345	-1.6494	0.068023	0.51621	0.09906	0.99964	-0.30511	-1.3494	0.12451	0.59397	0.17722	0.96437
Adipor1	0.11877	8023	3237	1248	4	0.36599	1.4321	0.085968	0.55458	0.15213	0.99964	0.24722	0.96449	0.47727	0.84353	0.3348	0.96437
Adipor2	-0.29704	1575	4080	9169	4	-0.10248	-0.35926	0.42036	0.82968	0.7194	0.99964	0.19456	0.68715	0.65442	0.91	0.49199	0.96642
Adk	-0.199288	2764	4030	7433	4	-0.0019882	-0.0080602	0.75961	0.95181	0.99357	0.99964	0.1973	0.80076	0.6428	0.90658	0.42327	0.96642
Adm	-0.213797	2567	2583	5786	4	0.078023	0.29772	0.90438	0.97992	0.76592	0.99964	0.29182	1.1141	0.35088	0.77972	0.26524	0.96437
Adnp	-0.198394	2778	3842	7203	4	0.0094865	0.029739	0.80627	0.96399	0.97628	0.99964	0.20788	0.65239	0.6087	0.89709	0.51415	0.96642
Adnp2	-0.06285	4923	4505	5176	4	0.10667	0.49489	0.78482	0.95897	0.62068	0.99964	0.16952	0.78556	0.75038	0.94358	0.43212	0.96642
Ado	0.445666	10848	8361	1156	4	0.37966	1.7019	0.073577	0.52465	0.088768	0.99964	-0.066006	-0.29376	0.46847	0.83964	0.76894	0.98045
Adora2b	-0.4933	442	4051	10955	4	-0.29706	-1.2532	0.11024	0.57744	0.21012	0.99964	0.19624	0.83238	0.64724	0.90658	0.4052	0.96437
Adpgk	0.110496	7904	8244	6300	4	0.05367	0.24906	0.98889	0.99759	0.80331	0.99964	-0.056826	-0.26272	0.49436	0.85564	0.79276	0.98507
Adprh	0.030642	6621	6650	5809	4	0.077086	0.33757	0.90745	0.97992	0.73569	0.99964	0.046444	0.20312	0.80755	0.96301	0.83904	0.98621
Adprhl1	0.021262	6449	6040	5226	4	0.10423	0.54122	0.79457	0.96103	0.58836	0.99964	0.082968	0.42971	0.92993	0.98725	0.66741	0.9733
Adprhl2	-0.281323	1738	1723	5779	4	0.078537	0.31134	0.9025	0.97978	0.75554	0.99964	0.35986	1.4313	0.20039	0.67612	0.15235	0.96437
Adprm	-0.357232	1101	2534	8513	4	-0.062052	-0.23976	0.54247	0.8856	0.81052	0.99964	0.29518	1.1456	0.34285	0.77557	0.25197	0.96437
Adra1a	0.23742	9434	11326	11083	4	-0.32254	-1.4837	0.092976	0.56082	0.13788	0.99964	-0.55996	-2.5596	0.036404	0.41762	0.01048	0.96437
Adrb1	-0.1166	4030	800	1265	4	0.36389	1.1784	0.088019	0.55695	0.23863	0.99964	0.48049	1.5589	0.056059	0.48342	0.11902	0.96437
Adrb2	0.03922	6783	9630	9676	4	-0.14203	-0.86804	0.3243	0.77828	0.38537	0.99964	-0.18125	-1.1047	0.25047	0.71449	0.2693	0.96437
Adrm1	0.519407	11081	8016	629	4	0.47755	1.2904	0.020851	0.3631	0.19693	0.99964	-0.041857	-0.11155	0.53444	0.86988	0.91118	0.99413
Adsl	0.09911	7731	10941	10973	4	-0.30044	-0.80798	0.10827	0.57453	0.4191	0.99964	-0.39955	-1.0684	0.076397	0.52041	0.28536	0.96437
Adss	0.46041	10899	11434	10094	4	-0.17986	-0.53948	0.24833	0.72356	0.58955	0.99964	-0.64027	-1.892	0.028884	0.41119	0.058495	0.96437
Adssl1	0.35668	10377	11462	11027	4	-0.31068	-0.94584	0.10024	0.57006	0.34423	0.99964	-0.66736	-2.0019	0.027688	0.41119	0.045291	0.96437
Adtrp	-0.40852	781	260	2806	4	0.2357	0.74301	0.31482	0.77136	0.45747	0.99964	0.64422	2.0398	0.0064946	0.25246	0.041366	0.96437
Aebp2	-0.367262	1040	1799	7681	4	-0.014702	-0.062598	0.71184	0.94167	0.95009	0.99964	0.35256	1.5044	0.21364	0.69004	0.13248	0.96437
Aen	0.521988	11091	8396	740	4	0.45243	1.2525	0.029824	0.40206	0.21038	0.99964	-0.069558	-0.1902	0.45949	0.8339	0.84915	0.98775
Afap1	0.566484	11198	8008	439	4	0.52489	1.8908	0.011024	0.28924	0.05865	0.99964	-0.041594	-0.14835	0.53529	0.86988	0.88206	0.99186
Afap1l1	-0.202018	2725	2896	5998	4	0.067882	0.2345	0.94787	0.98921	0.81459	0.99964	0.2699	0.93508	0.41096	0.80892	0.34975	0.96437
Afdn	-0.126726	3896	7328	9438	4	-0.12315	-0.56838	0.36455	0.80045	0.56978	0.99964	0.003576	0.016503	0.66245	0.91394	0.98683	0.99847
Aff1	-0.02521	5641	4289	4180	4	0.15671	0.6796	0.57964	0.90118	0.49675	0.99964	0.18192	0.78826	0.70304	0.92731	0.43055	0.96642
Aff4	0.622619	11320	11313	5989	4	0.068659	0.28367	0.94368	0.98704	0.77666	0.99964	-0.55396	-2.2507	0.037088	0.41762	0.024402	0.96437
Afg1l	0.01997	6425	4497	3592	4	0.18984	0.80444	0.45736	0.84488	0.42114	0.99964	0.16987	0.71838	0.74919	0.94299	0.47253	0.96642
Afg3l1	-0.25261	2096	202	875	4	0.42482	1.0115	0.042471	0.45305	0.31176	0.99964	0.67743	1.6151	0.0045291	0.22747	0.1063	0.96437
Afg3l2	-0.619852	195	293	7204	4	0.0094281	0.024594	0.80619	0.96399	0.98038	0.99964	0.62928	1.6594	0.007691	0.27108	0.09703	0.96437
Afm	0.00838	6238	1932	1387	4	0.35011	0.97182	0.10109	0.57006	0.33114	0.99964	0.34173	0.94822	0.23517	0.70509	0.34302	0.96437
Afmid	-0.218146	2509	2265	5382	4	0.096214	0.4128	0.82712	0.96975	0.67975	0.99964	0.31436	1.3517	0.29405	0.74696	0.17646	0.96437
Afp	0.303207	10018	10080	5978	4	0.069317	0.32038	0.94104	0.9864	0.74868	0.99964	-0.23389	-1.0738	0.18561	0.66769	0.2829	0.96437
Aftph	-0.06516	4881	1847	2124	4	0.28334	0.94175	0.20279	0.68723	0.34632	0.99964	0.3485	1.157	0.2209	0.69779	0.24728	0.96437
Aga	-0.29731	1571	598	2917	4	0.2276	0.69278	0.33738	0.78587	0.48845	0.99964	0.52491	1.6002	0.033584	0.41762	0.10955	0.96437
Agap1	0.0934	7633	10521	10385	4	-0.20951	-0.8889	0.20108	0.68508	0.37406	0.99964	-0.30291	-1.28	0.12596	0.59596	0.20053	0.96437
Agap3	-0.33726	1241	606	3652	4	0.1854	0.55564	0.47317	0.85361	0.57846	0.99964	0.52266	1.5741	0.034353	0.41762	0.11545	0.96437
Agbl3	0.09286	7619	10188	9827	4	-0.1545	-0.73043	0.29756	0.76325	0.46513	0.99964	-0.24736	-1.1656	0.17253	0.65886	0.24378	0.96437
Agbl5	-0.2826	1726	499	2307	4	0.26936	0.92191	0.23329	0.71201	0.35658	0.99964	0.55196	1.8999	0.023415	0.41119	0.057442	0.96437
Ager	-0.372169	993	1030	5895	4	0.073401	0.2589	0.92309	0.98236	0.79571	0.99964	0.44557	1.5787	0.085883	0.53594	0.11441	0.96437
Agfg1	-0.188661	2939	5900	9116	4	-0.09862	-0.38537	0.42993	0.83441	0.69996	0.99964	0.090041	0.35288	0.95847	0.9931	0.72418	0.97435
Agfg2	-0.21299	2574	256	845	4	0.43282	1.3011	0.038199	0.43064	0.19321	0.99964	0.64581	1.9422	0.0064946	0.25246	0.052107	0.96437
Aggf1	0.111804	7926	7595	5348	4	0.097836	0.39702	0.82012	0.96755	0.69135	0.99964	-0.013968	-0.056423	0.61092	0.89709	0.95501	0.99626
Agk	0.20172	9057	6568	2526	4	0.25318	0.7222	0.27055	0.74302	0.47017	0.99964	0.05146	0.14582	0.82353	0.96604	0.88406	0.99186
Agl	0.32845	10195	9803	4723	4	0.12909	0.57409	0.68817	0.93455	0.5659	0.99964	-0.19936	-0.87997	0.2256	0.69876	0.37888	0.96437
Agmo	-0.11476	4068	2742	4010	4	0.16508	0.63327	0.55042	0.8907	0.52656	0.99964	0.27984	1.0729	0.38182	0.79757	0.28329	0.96437
Ago1	0.25047	9581	5193	1151	4	0.38013	1.6426	0.073064	0.5239	0.10046	0.99964	0.12966	0.55667	0.8954	0.98102	0.57775	0.96759
Ago2	-0.10853	4184	2491	3588	4	0.18997	0.26621	0.45693	0.84471	0.79008	0.99964	0.2985	0.41983	0.3343	0.77175	0.67461	0.9733
Ago3	-0.0137	5832	8007	8420	4	-0.055241	-0.24392	0.56546	0.89628	0.80729	0.99964	-0.041541	-0.18311	0.53546	0.86988	0.85471	0.98883
Ago4	-0.125759	3914	5027	7138	4	0.012451	0.048595	0.81738	0.96636	0.96124	0.99964	0.13821	0.53909	0.86592	0.97863	0.58983	0.96993
Agpat1	0.43124	10772	10595	5050	4	0.11341	0.37602	0.75551	0.94994	0.7069	0.99964	-0.31783	-1.0393	0.11588	0.57702	0.29867	0.96437
Agpat2	-0.25717	2028	5230	9522	4	-0.12972	-0.53377	0.35097	0.79562	0.5935	0.99964	0.12745	0.52572	0.90284	0.98246	0.59909	0.97075
Agpat3	-0.0782646	4671	6210	7478	4	-0.0042806	-0.016313	0.75013	0.94853	0.98698	0.99964	0.073984	0.28194	0.89754	0.98125	0.77799	0.98203
Agpat4	-0.136266	3738	7310	9546	4	-0.13142	-0.67437	0.34729	0.79325	0.50007	0.99964	0.004846	0.024878	0.66613	0.91534	0.98015	0.99847
Agpat5	-0.50893	406	2921	10618	4	-0.24102	-0.79484	0.16031	0.64049	0.4267	0.99964	0.26791	0.8933	0.41625	0.81205	0.3717	0.96437
Agps	-0.281126	1741	7537	10925	4	-0.29115	-1.1451	0.11434	0.58239	0.25215	0.99964	-0.010024	-0.039523	0.62331	0.90187	0.96847	0.99726
Agrn	-0.48903	454	5186	11217	4	-0.359	-1.5003	0.073663	0.52465	0.13354	0.99964	0.13003	0.54651	0.89463	0.98102	0.58471	0.96993
Agt	-0.190554	2906	3245	6240	4	0.056506	0.17445	0.99974	0.99983	0.86151	0.99964	0.24706	0.76373	0.47821	0.84371	0.44503	0.96642
Agtpbp1	-0.21371	2568	1370	3676	4	0.1842	0.68303	0.4759	0.85388	0.49459	0.99964	0.39791	1.4763	0.14117	0.61896	0.13987	0.96437
Agtrap	0.291519	9941	10900	9068	4	-0.095711	-0.30324	0.43779	0.83689	0.7617	0.99964	-0.38723	-1.2196	0.080755	0.52617	0.2226	0.96437
Agxt	-0.149592	3538	7107	9554	4	-0.13211	-0.56793	0.34515	0.79041	0.57008	0.99964	0.017482	0.075263	0.70586	0.92743	0.94001	0.99565
Ahctf1	-1.05472	29	23	6973	4	0.02098	0.013309	0.85079	0.97089	0.98938	0.99964	1.0757	0.70731	0	0	0.47937	0.96642
Ahcy	-0.147168	3579	4122	6486	4	0.044582	0.10071	0.94873	0.98922	0.91978	0.99964	0.19175	0.43365	0.66578	0.91519	0.66454	0.97326
Ahcyl1	-0.057819	5013	8051	9164	4	-0.10213	-0.62819	0.42138	0.83002	0.52988	0.99964	-0.044311	-0.27223	0.5282	0.86744	0.78545	0.98405
Ahcyl2	-0.20676	2658	776	2190	4	0.27817	1.1523	0.21398	0.69749	0.24918	0.99964	0.48493	2.0096	0.053922	0.481	0.044471	0.96437
Ahdc1	-0.09909	4315	2190	3034	4	0.22053	0.98571	0.35934	0.79867	0.32428	0.99964	0.31962	1.4271	0.28029	0.7346	0.15355	0.96437
Ahi1	0.257759	9636	10306	7509	4	-0.0058613	-0.02459	0.74415	0.94646	0.98038	0.99964	-0.26362	-1.0992	0.15621	0.64515	0.27167	0.96437
Ahnak	-0.033247	5496	8329	9097	4	-0.096927	-0.59571	0.43505	0.83582	0.55137	0.99964	-0.06368	-0.39108	0.47547	0.84316	0.69574	0.9733
Ahr	-0.14492	3612	1134	2097	4	0.28543	0.85429	0.19843	0.68231	0.39294	0.99964	0.43035	1.2908	0.10032	0.55985	0.19678	0.96437
Ahrr	-0.48687	462	5552	11277	4	-0.37746	-1.9516	0.066057	0.50855	0.05099	0.99964	0.10941	0.56797	0.97052	0.99588	0.57005	0.96642
Ahsa2	-0.044463	5266	5629	6149	4	0.060617	0.2291	0.98009	0.99679	0.81879	0.99964	0.10508	0.39695	0.98573	0.99758	0.69141	0.9733
Ahsg	-0.020261	5716	6749	7001	4	0.020086	0.086107	0.8478	0.97075	0.93138	0.99964	0.040347	0.17277	0.78559	0.95611	0.86283	0.98977
AI182371	0.10262	7789	10473	10221	4	-0.19215	-0.9251	0.22629	0.70689	0.35491	0.99964	-0.29477	-1.4129	0.13186	0.60486	0.15767	0.96437
AI413582	-0.25202	2101	4840	9166	4	-0.10234	-0.48957	0.42078	0.82968	0.62444	0.99964	0.14968	0.7186	0.82396	0.96604	0.47239	0.96642
AI467606	-0.14397	3631	1764	3182	4	0.21146	0.81231	0.38882	0.81776	0.41662	0.99964	0.35543	1.3668	0.20808	0.68346	0.17168	0.96437
AI597479	0.0280052	6579	7391	6852	4	0.027054	0.10009	0.87455	0.97602	0.92027	0.99964	-0.00095122	-0.0035144	0.64844	0.90691	0.9972	0.99924
AI837181	-0.36797	1035	4662	10369	4	-0.20794	-0.61477	0.20398	0.68807	0.53871	0.99964	0.16003	0.47541	0.78593	0.95633	0.6345	0.97075
AI987944	0.38386	10536	9149	2561	4	0.25111	0.83491	0.27611	0.74584	0.40377	0.99964	-0.13275	-0.43667	0.32943	0.76762	0.66235	0.97301
Aicda	-0.083643	4581	5133	6408	4	0.048687	0.18453	0.96719	0.99473	0.8536	0.99964	0.13233	0.50152	0.88677	0.98102	0.616	0.97075
Aida	-0.197467	2802	3041	6100	4	0.062813	0.28322	0.97086	0.99527	0.77701	0.99964	0.26028	1.1767	0.43941	0.82404	0.2393	0.96437
Aif1	-0.43998	632	2661	9816	4	-0.1539	-0.56993	0.29935	0.76443	0.56872	0.99964	0.28608	1.0632	0.36489	0.78681	0.28771	0.96437
Aif1l	-0.212851	2577	4262	7949	4	-0.029561	-0.11355	0.65784	0.92472	0.90959	0.99964	0.18329	0.7041	0.69826	0.9261	0.48137	0.96642
Aifm1	-0.14263	3662	2158	3761	4	0.17987	0.83813	0.49325	0.86306	0.40196	0.99964	0.3225	1.5049	0.27457	0.73239	0.13235	0.96437
Aifm2	0.269085	9743	9868	6119	4	0.061865	0.28139	0.97419	0.99538	0.77841	0.99964	-0.20722	-0.93602	0.21484	0.69094	0.34926	0.96437
Aim2	0.08321	7469	10128	9849	4	-0.15673	-0.5787	0.29371	0.76166	0.56279	0.99964	-0.23994	-0.88318	0.1798	0.66237	0.37714	0.96437
Aimp1	0.172202	8712	8079	4773	4	0.12637	0.42252	0.70176	0.94024	0.67265	0.99964	-0.045832	-0.15225	0.52418	0.86678	0.87899	0.99169
Aimp2	-0.03605	5443	9529	10357	4	-0.20673	-0.68456	0.20492	0.68807	0.49362	0.99964	-0.17068	-0.5651	0.26448	0.72364	0.57201	0.96642
Aip	-0.408486	782	1555	7999	4	-0.032386	-0.10258	0.64784	0.92314	0.91829	0.99964	0.3761	1.1982	0.17305	0.65886	0.23085	0.96437
Aipl1	0.05786	7064	3152	1813	4	0.3109	1.4038	0.15373	0.62902	0.16037	0.99964	0.25304	1.1395	0.46163	0.83558	0.25451	0.96437
Ajm1	-0.301929	1528	2977	8094	4	-0.037249	-0.15607	0.63083	0.91881	0.87598	0.99964	0.26468	1.1137	0.42608	0.81583	0.26542	0.96437
Ajuba	-0.160517	3367	7052	9660	4	-0.14042	-0.67193	0.32738	0.78121	0.50163	0.99964	0.020097	0.096397	0.71569	0.93056	0.9232	0.99432
Ak1	0.29335	9955	2929	331	4	0.56077	1.573	0.0070928	0.24719	0.11573	0.99964	0.26742	0.746	0.41779	0.81267	0.45567	0.96642
Ak2	0.43178	10775	9454	2324	4	0.26871	0.57595	0.23517	0.71336	0.56465	0.99964	-0.16307	-0.34418	0.2767	0.73324	0.73071	0.97534
Ak3	-0.144373	3624	6180	8627	4	-0.068987	-0.25629	0.52051	0.8759	0.79772	0.99964	0.075386	0.28008	0.90292	0.98246	0.77942	0.98203
Ak4	0.62817	11326	11531	9488	4	-0.12717	-0.48891	0.35669	0.79756	0.62491	0.99964	-0.75534	-2.8602	0.024697	0.41119	0.0042343	0.85431
Ak8	0.064724	7164	7115	5706	4	0.081708	0.33492	0.88968	0.97813	0.73769	0.99964	0.016984	0.069443	0.70458	0.92743	0.94464	0.99571
Akap1	-0.107975	4194	8443	10112	4	-0.18108	-0.83161	0.24577	0.72316	0.40563	0.99964	-0.073105	-0.33557	0.4512	0.83145	0.73719	0.97608
Akap10	0.57925	11217	10457	2089	4	0.28631	0.94872	0.19672	0.67946	0.34276	0.99964	-0.29294	-0.95308	0.13323	0.60567	0.34055	0.96437
Akap11	-0.41869	732	2949	9797	4	-0.1527	-0.62039	0.30166	0.76443	0.535	0.99964	0.26599	1.0872	0.42181	0.81369	0.27697	0.96437
Akap12	-0.34412	1191	4360	9953	4	-0.16629	-0.74355	0.27406	0.74584	0.45715	0.99964	0.17783	0.79744	0.71774	0.93085	0.4252	0.96642
Akap13	-0.10249	4260	2671	3711	4	0.18237	0.86805	0.48359	0.85829	0.38537	0.99964	0.28486	1.3557	0.36806	0.79151	0.17521	0.96437
Akap17b	0.3697	10458	9322	3036	4	0.22036	0.91832	0.35985	0.7989	0.35845	0.99964	-0.14934	-0.6173	0.29986	0.74925	0.53704	0.96642
Akap3	-0.097484	4345	8307	9874	4	-0.15933	-0.96859	0.28764	0.75743	0.33275	0.99964	-0.061846	-0.37552	0.48035	0.84503	0.70728	0.97373
Akap5	-0.12015	3982	2066	3202	4	0.21057	1.1356	0.39173	0.8189	0.25613	0.99964	0.33072	1.7826	0.25654	0.71917	0.074645	0.96437
Akap6	-0.09195	4445	1313	1782	4	0.31353	1.0634	0.14903	0.62011	0.28758	0.99964	0.40548	1.3762	0.13075	0.60408	0.16876	0.96437
Akap7	-0.00251	6040	4288	3764	4	0.17952	0.9305	0.49479	0.86402	0.35211	0.99964	0.18203	0.9414	0.7027	0.92731	0.3465	0.96437
Akap8l	-0.15281	3506	5724	8388	4	-0.05233	-0.19727	0.57597	0.90072	0.84361	0.99964	0.10048	0.37848	0.99556	0.99829	0.70507	0.97373
Akap9	-0.0690261	4807	6357	7475	4	-0.0041241	-0.013421	0.75098	0.94853	0.98929	0.99964	0.064902	0.2115	0.86951	0.97904	0.8325	0.98591
Akip1	0.292425	9946	9782	5392	4	0.095735	0.35338	0.82866	0.9698	0.7238	0.99964	-0.19669	-0.72031	0.22885	0.70238	0.47134	0.96642
Akirin1	-0.0175	5767	10752	11239	4	-0.36631	-1.2188	0.070415	0.51791	0.22294	0.99964	-0.34881	-1.1604	0.097932	0.55604	0.24587	0.96437
Akirin2	-0.014616	5814	8577	9119	4	-0.099001	-0.19498	0.42933	0.83441	0.84541	0.99964	-0.084385	-0.16634	0.42454	0.81536	0.86789	0.99077
Akr1a1	0.399356	10619	6960	873	4	0.42527	1.4826	0.042386	0.45297	0.13818	0.99964	0.025914	0.089733	0.73663	0.93757	0.9285	0.99483
Akr1b10	-0.04074	5352	2632	2603	4	0.24744	0.98345	0.28551	0.75657	0.32539	0.99964	0.28818	1.1446	0.35977	0.78501	0.25239	0.96437
Akr1b3	0.18292	8851	4834	1560	4	0.33278	1.2059	0.12126	0.59389	0.22787	0.99964	0.14986	0.54101	0.82319	0.96604	0.5885	0.96993
Akr1b7	-0.379978	936	1882	8035	4	-0.034088	-0.12335	0.64194	0.92173	0.90183	0.99964	0.34589	1.2551	0.2268	0.70026	0.20945	0.96437
Akr1b8	-0.08011	4641	9818	10870	4	-0.28075	-1.6711	0.12237	0.59462	0.094692	0.99964	-0.20064	-1.1954	0.22415	0.69859	0.23192	0.96437
Akr1c13	-0.49202	445	1589	9384	4	-0.11879	-0.60121	0.37489	0.80795	0.5477	0.99964	0.37323	1.9036	0.17732	0.65936	0.056963	0.96437
Akr1c14	0.05376	6999	2875	1667	4	0.32471	0.36836	0.13263	0.60398	0.7126	0.99964	0.27095	0.3072	0.40779	0.80828	0.75869	0.97906
Akr1c6	-0.4768	501	5730	11275	4	-0.37659	-2.0449	0.066826	0.51111	0.040869	0.99964	0.10021	0.54733	0.99462	0.9982	0.58416	0.96993
Akr1d1	-0.08811	4509	3575	4546	4	0.13748	0.41656	0.65433	0.92454	0.677	0.99964	0.22559	0.68308	0.55068	0.87364	0.49455	0.96642
Akr1e1	-0.241674	2224	8150	10934	4	-0.29235	-1.0868	0.11374	0.58239	0.27715	0.99964	-0.050676	-0.18856	0.51239	0.86398	0.85044	0.98798
Akr7a5	0.249201	9568	8297	3617	4	0.1877	0.79866	0.46556	0.84966	0.42449	0.99964	-0.061501	-0.26001	0.48129	0.84503	0.79485	0.98507
Akt1	0.197555	9016	6633	2641	4	0.24527	1.0597	0.29149	0.76166	0.28928	0.99964	0.047715	0.20539	0.81208	0.9642	0.83727	0.98618
Akt1s1	-0.259993	1996	4273	8777	4	-0.077243	-0.16174	0.49274	0.86292	0.87151	0.99964	0.18275	0.38505	0.70056	0.92711	0.7002	0.9733
Akt2	0.146923	8384	9191	7185	4	0.010023	0.047353	0.80867	0.96406	0.96223	0.99964	-0.1369	-0.64323	0.32157	0.76367	0.52007	0.96642
Akt3	0.67545	11399	11140	3082	4	0.21763	0.87757	0.36891	0.80483	0.38018	0.99964	-0.45782	-1.8204	0.056913	0.48621	0.068694	0.96437
Aktip	0.378262	10504	6840	959	4	0.41258	1.6281	0.049991	0.47794	0.1035	0.99964	0.034318	0.13424	0.76474	0.94823	0.89321	0.99313
Alad	-0.36859	1030	829	5181	4	0.10606	0.49022	0.78704	0.96038	0.62398	0.99964	0.47465	2.1993	0.060502	0.49275	0.027858	0.96437
Alas1	-0.466601	535	746	6888	4	0.025119	0.085674	0.86686	0.97391	0.93173	0.99964	0.49172	1.6896	0.050077	0.46693	0.091098	0.96437
Alb	0.0453195	6872	8179	7539	4	-0.0075475	-0.022858	0.73731	0.94523	0.98176	0.99964	-0.052867	-0.15947	0.50598	0.8604	0.8733	0.99169
Alcam	-0.652893	158	365	8382	4	-0.052093	-0.18039	0.57657	0.90072	0.85684	0.99964	0.6008	2.0978	0.011878	0.33254	0.035922	0.96437
Aldh16a1	0.36864	10449	9217	2893	4	0.2292	1.0805	0.33387	0.78454	0.27991	0.99964	-0.13944	-0.65061	0.31636	0.75938	0.5153	0.96642
Aldh18a1	0.07711	7380	1472	699	4	0.46243	1.5076	0.025893	0.38356	0.13166	0.99964	0.38532	1.2516	0.16049	0.64781	0.21073	0.96437
Aldh1a1	-0.04207	5321	4319	4527	4	0.13833	0.74578	0.65066	0.92314	0.4558	0.99964	0.1804	0.9709	0.70885	0.92872	0.3316	0.96437
Aldh1a3	-0.018686	5743	7324	7682	4	-0.014753	-0.052062	0.7115	0.94166	0.95848	0.99964	0.003933	0.013875	0.66339	0.91409	0.98893	0.99847
Aldh1a7	-0.02458	5651	9219	9926	4	-0.16498	-0.8707	0.27679	0.74631	0.38392	0.99964	-0.1404	-0.73997	0.31525	0.75812	0.45932	0.96642
Aldh1b1	-0.07276	4751	3113	3713	4	0.18225	0.79935	0.48411	0.85846	0.42409	0.99964	0.25501	1.117	0.45505	0.83195	0.26398	0.96437
Aldh1l1	-0.267954	1894	3879	8523	4	-0.062444	-0.1848	0.54162	0.88545	0.85338	0.99964	0.20551	0.61103	0.6169	0.89945	0.54118	0.96642
Aldh1l2	-0.04654	5232	1092	1092	4	0.3898	0.76151	0.065544	0.50594	0.44635	0.99964	0.43634	0.85179	0.094685	0.55291	0.39433	0.96437
Aldh2	-0.090422	4465	8260	9751	4	-0.14847	-0.60109	0.31114	0.76954	0.54778	0.99964	-0.058048	-0.2353	0.49	0.85175	0.81398	0.98591
Aldh3a2	-0.128114	3874	8466	10328	4	-0.20324	-0.96557	0.21005	0.69463	0.33426	0.99964	-0.075126	-0.35742	0.44591	0.82668	0.72078	0.97435
Aldh3b1	0.240502	9471	7580	2925	4	0.22709	0.94903	0.33892	0.78612	0.34261	0.99964	-0.013412	-0.055648	0.61212	0.89729	0.95562	0.99626
Aldh4a1	0.245773	9523	10547	8524	4	-0.062457	-0.26839	0.54153	0.88545	0.7884	0.99964	-0.30823	-1.3146	0.12271	0.59168	0.18865	0.96437
Aldh5a1	0.24603	9526	11392	11229	4	-0.3624	-1.4321	0.072466	0.52313	0.15211	0.99964	-0.60843	-2.3896	0.031619	0.41685	0.016868	0.96437
Aldh6a1	-0.09608	4363	1917	2608	4	0.24707	0.87177	0.28653	0.75723	0.38333	0.99964	0.34315	1.2111	0.23261	0.70372	0.22587	0.96437
Aldh7a1	0.383733	10535	11176	8947	4	-0.088577	-0.31784	0.45898	0.84548	0.75061	0.99964	-0.47231	-1.6768	0.053068	0.4788	0.093583	0.96437
Aldh8a1	-0.514453	386	413	6020	4	0.067017	0.17636	0.95223	0.9904	0.86001	0.99964	0.58147	1.5411	0.015809	0.37755	0.12328	0.96437
Aldoa	-0.410963	767	1631	8202	4	-0.042633	-0.035101	0.60955	0.91157	0.972	0.99964	0.36833	0.30808	0.18638	0.66769	0.75802	0.97906
Aldob	-0.44275	624	4820	10931	4	-0.29206	-1.0378	0.11391	0.58239	0.29938	0.99964	0.15069	0.54091	0.81986	0.96604	0.58857	0.96993
Aldoc	-0.2471	2161	5491	9575	4	-0.13425	-0.7332	0.33977	0.78612	0.46343	0.99964	0.11285	0.61779	0.95864	0.9931	0.53671	0.96642
Alg1	0.373631	10479	10909	7728	4	-0.017009	-0.033954	0.70424	0.94034	0.97291	0.99964	-0.39064	-0.7657	0.079388	0.52189	0.44385	0.96642
Alg10b	0.13814	8272	5641	2686	4	0.24276	0.7528	0.29747	0.76325	0.45157	0.99964	0.10462	0.32288	0.98761	0.99767	0.74679	0.9774
Alg11	-0.270724	1860	1611	5317	4	0.099496	0.24094	0.81294	0.96451	0.8096	0.99964	0.37022	0.90128	0.18287	0.66667	0.36744	0.96437
Alg12	0.1463	8373	206	71	4	0.81768	1.8879	0.00017091	0.022727	0.059033	0.99964	0.67138	1.5452	0.0047855	0.23529	0.1223	0.96437
Alg13	0.15281	8468	5712	2513	4	0.25401	0.69426	0.26884	0.74254	0.48752	0.99964	0.1012	0.27452	0.99906	0.9994	0.78368	0.98369
Alg14	0.04	6800	10288	10465	4	-0.22117	-0.46037	0.18561	0.66841	0.64525	0.99964	-0.26117	-0.54208	0.15878	0.64649	0.58776	0.96993
Alg2	0.28753	9901	11662	11681	4	-0.83017	-1.4138	0.017604	0.34276	0.15742	0.99964	-1.1177	-1.8856	0.0082037	0.27507	0.059352	0.96437
Alg3	-0.11633	4035	2827	4179	4	0.15686	0.61588	0.57922	0.90118	0.53797	0.99964	0.27319	1.0734	0.40079	0.80772	0.28309	0.96437
Alg5	0.39838	10611	8899	2046	4	0.28901	0.87363	0.19099	0.6742	0.38232	0.99964	-0.10937	-0.32702	0.37293	0.79286	0.74365	0.97664
Alg6	0.13134	8192	1325	391	4	0.5355	1.1964	0.009571	0.27561	0.23155	0.99964	0.40416	0.90012	0.13237	0.60531	0.36806	0.96437
Alg8	0.18095	8824	2777	718	4	0.45825	1.534	0.027431	0.38909	0.12502	0.99964	0.2773	0.92453	0.38942	0.80204	0.35521	0.96437
Alg9	0.15135	8443	4561	1734	4	0.31798	1.1325	0.14263	0.61353	0.25741	0.99964	0.16663	0.59039	0.76072	0.94601	0.55493	0.96642
Alkbh1	-0.36149	1070	3286	9367	4	-0.11773	-0.4346	0.37831	0.81006	0.66385	0.99964	0.24376	0.90286	0.48949	0.85175	0.3666	0.96437
Alkbh2	0.04499	6867	5838	4507	4	0.13899	0.56392	0.64818	0.92314	0.57281	0.99964	0.094	0.38056	0.97283	0.99615	0.70353	0.97373
Alkbh3	0.101019	7766	9006	7764	4	-0.019051	-0.081063	0.69774	0.93926	0.93539	0.99964	-0.12007	-0.50874	0.35302	0.78088	0.61093	0.97075
Alkbh4	0.40527	10650	8823	1891	4	0.30294	1.2761	0.16749	0.65029	0.20191	0.99964	-0.10233	-0.42705	0.38609	0.80021	0.66934	0.9733
Alkbh5	-0.6025	219	3464	11250	4	-0.36968	-2.0811	0.069732	0.51705	0.037427	0.99964	0.23282	1.3241	0.52658	0.86678	0.18545	0.96437
Alkbh6	-0.34593	1174	280	2079	4	0.28705	1.0002	0.19484	0.67726	0.31721	0.99964	0.63298	2.21	0.0072637	0.26235	0.027108	0.96437
Alkbh7	0.226611	9332	6011	1807	4	0.31123	1.4362	0.15297	0.62837	0.15094	0.99964	0.084619	0.38881	0.93582	0.98809	0.69742	0.9733
Alkbh8	-0.440996	629	886	6890	4	0.024944	0.076526	0.86652	0.97379	0.939	0.99964	0.46594	1.4399	0.06751	0.50932	0.14989	0.96437
Alms1	-0.09837	4329	3596	4774	4	0.12633	0.47376	0.70185	0.94024	0.63567	0.99964	0.2247	0.84201	0.55384	0.8749	0.39978	0.96437
Alox5ap	0.113027	7942	7959	5861	4	0.07465	0.2857	0.91702	0.9809	0.77511	0.99964	-0.038377	-0.14627	0.54273	0.87119	0.88371	0.99186
Aloxe3	-0.04224	5316	2006	1998	4	0.29339	1.0272	0.18347	0.66615	0.30434	0.99964	0.33563	1.1758	0.24662	0.71351	0.23968	0.96437
Alpk1	0.216465	9227	10273	8188	4	-0.041825	-0.21002	0.61254	0.91219	0.83365	0.99964	-0.25829	-1.2887	0.16151	0.64854	0.1975	0.96437
Alpk2	0.04638	6884	5112	3758	4	0.17998	0.58407	0.49291	0.86306	0.55917	0.99964	0.1336	0.43192	0.88258	0.98102	0.6658	0.9733
Alpl	-0.02485	5644	4372	4268	4	0.15207	0.60564	0.59725	0.90743	0.54475	0.99964	0.17692	0.70448	0.72124	0.9328	0.48113	0.96642
Als2	-0.0596	4986	10703	11356	4	-0.39735	-1.4483	0.058622	0.49602	0.14753	0.99964	-0.33775	-1.2346	0.10443	0.56256	0.21699	0.96437
Als2cl	0.240384	9466	8164	3610	4	0.18836	0.75678	0.46334	0.84832	0.44918	0.99964	-0.052024	-0.20794	0.50837	0.8613	0.83528	0.98591
Alyref	-0.15757	3430	8956	10819	4	-0.2729	-0.58371	0.13015	0.60317	0.55942	0.99964	-0.11533	-0.24631	0.36156	0.78556	0.80544	0.98555
Alyref2	0.39544	10592	11356	10182	4	-0.18841	-0.74827	0.23244	0.71201	0.4543	0.99964	-0.58385	-2.2958	0.034097	0.41762	0.021687	0.96437
Amacr	0.27599	9792	11029	9693	4	-0.14374	-0.56557	0.3202	0.77513	0.57169	0.99964	-0.41973	-1.6386	0.068364	0.51009	0.10129	0.96437
Ambp	-0.01427	5822	9978	10583	4	-0.2359	-0.98303	0.16689	0.65029	0.32559	0.99964	-0.22163	-0.92366	0.19851	0.67553	0.35567	0.96437
Ambra1	-0.636798	177	7994	11652	4	-0.6775	-2.8859	0.022817	0.37119	0.0039034	0.99964	-0.040702	-0.17697	0.5376	0.87078	0.85953	0.98883
Amd1	-1.06577	28	1525	11654	4	-0.68666	-1.6405	0.02256	0.37119	0.10091	0.99964	0.37911	0.9325	0.16886	0.65442	0.35108	0.96437
Amd2	-0.25477	2069	4776	9158	4	-0.10189	-0.3261	0.42232	0.83087	0.74435	0.99964	0.15288	0.49052	0.81131	0.9642	0.62377	0.97075
Amdhd1	-0.25187	2105	6594	10312	4	-0.20146	-1.0507	0.21313	0.69668	0.2934	0.99964	0.05041	0.2634	0.82003	0.96604	0.79224	0.98507
Amdhd2	0.283132	9858	7615	2335	4	0.26788	1.0917	0.23774	0.71701	0.27496	0.99964	-0.015252	-0.061776	0.6081	0.89709	0.95074	0.9959
Amer1	0.06212	7127	10140	10096	4	-0.18016	-0.80223	0.24756	0.72356	0.42242	0.99964	-0.24228	-1.0751	0.17792	0.65959	0.28233	0.96437
Amfr	-0.4579	568	2573	9930	4	-0.16511	-0.61973	0.2767	0.74631	0.53544	0.99964	0.29279	1.105	0.3484	0.7788	0.26916	0.96437
Amhr2	-0.019672	5726	8105	8616	4	-0.067683	-0.27429	0.52529	0.87995	0.78387	0.99964	-0.048011	-0.19442	0.51871	0.86454	0.84585	0.98699
Amigo1	-0.279017	1772	7020	10721	4	-0.25685	-0.40517	0.14322	0.61353	0.68535	0.99964	0.022167	0.035179	0.72312	0.93349	0.97194	0.99752
Amigo3	-0.1869	2972	2139	4538	4	0.13766	0.51987	0.65348	0.92441	0.60316	0.99964	0.32456	1.2275	0.27038	0.72838	0.21963	0.96437
Ammecr1	-0.307151	1485	3303	8556	4	-0.064841	-0.37142	0.53401	0.88127	0.71033	0.99964	0.24231	1.3908	0.49598	0.85706	0.16429	0.96437
Ammecr1l	0.107291	7858	7213	4935	4	0.11802	0.41374	0.735	0.94523	0.67907	0.99964	0.010729	0.03746	0.68399	0.92148	0.97012	0.99748
Amn1	0.27686	9801	4420	744	4	0.45161	1.8561	0.030166	0.40297	0.063436	0.99964	0.17475	0.71457	0.7297	0.9344	0.47488	0.96642
Amotl1	-0.01381	5831	2746	2370	4	0.26571	0.72888	0.24329	0.72039	0.46607	0.99964	0.27952	0.76565	0.38301	0.79879	0.44388	0.96642
Amotl2	-0.179373	3066	5705	8784	4	-0.077703	-0.38895	0.49145	0.86225	0.69732	0.99964	0.10167	0.5093	0.99906	0.9994	0.61054	0.97075
Ampd2	-0.143304	3640	6287	8725	4	-0.073937	-0.20789	0.5035	0.86867	0.83532	0.99964	0.069367	0.19524	0.88446	0.98102	0.84521	0.98699
Ampd3	-0.04668	5226	4796	5197	4	0.10535	0.44403	0.79021	0.96053	0.65702	0.99964	0.15203	0.63979	0.81439	0.96493	0.52231	0.96642
Amt	-0.404633	800	697	5391	4	0.095737	0.32617	0.82866	0.9698	0.74429	0.99964	0.50037	1.7106	0.04495	0.45034	0.087158	0.96437
Amy1	-0.354008	1123	1648	7133	4	0.012902	0.04848	0.8196	0.96732	0.96133	0.99964	0.36691	1.3867	0.18843	0.6692	0.16552	0.96437
Amz1	-0.66414	141	2448	11233	4	-0.36274	-1.3315	0.072295	0.52313	0.18304	0.99964	0.3014	1.1152	0.32644	0.76613	0.26476	0.96437
Amz2	-0.16413	3308	7508	10009	4	-0.17213	-0.643	0.26218	0.73656	0.52023	0.99964	-0.0079996	-0.030022	0.62912	0.9027	0.97605	0.99802
Anapc1	0.30964	10064	3800	457	4	0.52044	0.99906	0.011536	0.29158	0.31777	0.99964	0.2108	0.40055	0.59768	0.89269	0.68875	0.9733
Anapc10	0.948	11613	9527	90	4	0.77761	1.5569	0.00034182	0.043011	0.11948	0.99964	-0.17039	-0.33015	0.26508	0.7246	0.74129	0.97658
Anapc11	-0.13046	3833	933	1617	4	0.32855	0.60086	0.12733	0.60056	0.54794	0.99964	0.45901	0.84221	0.073834	0.5181	0.39967	0.96437
Anapc13	-0.04584	5244	9336	10266	4	-0.19659	-0.34325	0.21945	0.70043	0.73141	0.99964	-0.15075	-0.26303	0.2979	0.74914	0.79253	0.98507
Anapc16	-0.14451	3619	2968	4884	4	0.1206	0.4125	0.72543	0.94469	0.67997	0.99964	0.26511	0.90581	0.42463	0.81539	0.36503	0.96437
Anapc2	-0.33593	1252	5331	10416	4	-0.21424	-0.58572	0.19458	0.67687	0.55807	0.99964	0.12169	0.33656	0.9236	0.98595	0.73645	0.97608
Anapc4	-0.051626	5139	8409	9422	4	-0.12224	-0.36203	0.36729	0.80216	0.71733	0.99964	-0.070614	-0.20882	0.45676	0.83349	0.83459	0.98591
Anapc5	0.654097	11376	7696	212	4	0.63301	1.2058	0.0027346	0.14655	0.2279	0.99964	-0.021087	-0.03904	0.59118	0.88937	0.96886	0.99732
Anapc7	0.22493	9312	10639	9147	4	-0.10085	-0.43468	0.42531	0.83339	0.6638	0.99964	-0.32578	-1.3971	0.11109	0.57068	0.16238	0.96437
Ang	0.24131	9477	10797	9376	4	-0.11837	-0.53977	0.37609	0.80889	0.58936	0.99964	-0.35968	-1.6294	0.093574	0.55048	0.10322	0.96437
Angel1	-0.11562	4051	1760	2728	4	0.24027	1.0614	0.30337	0.76443	0.2885	0.99964	0.35589	1.5722	0.20723	0.68252	0.1159	0.96437
Angel2	-0.12709	3889	3492	5236	4	0.10355	0.39664	0.79704	0.96194	0.69163	0.99964	0.23064	0.88376	0.53418	0.86988	0.37683	0.96437
Angpt2	-0.20688	2655	1719	4246	4	0.1533	0.63429	0.59221	0.9045	0.52589	0.99964	0.36018	1.492	0.19979	0.67553	0.1357	0.96437
Angptl2	-0.054646	5072	5331	6018	4	0.067044	0.23512	0.95214	0.9904	0.81412	0.99964	0.12169	0.42671	0.9236	0.98595	0.66959	0.9733
Angptl3	-0.229397	2380	7801	10730	4	-0.25782	-1.055	0.14254	0.61353	0.29141	0.99964	-0.028423	-0.11657	0.56854	0.87921	0.9072	0.99413
Angptl4	-0.158918	3408	6439	9115	4	-0.098536	-0.43811	0.4301	0.83441	0.6613	0.99964	0.060382	0.26896	0.85336	0.9764	0.78796	0.98479
Angptl6	0.330967	10216	10368	6248	4	0.056057	0.13538	0.99846	0.99949	0.89231	0.99964	-0.27491	-0.65526	0.14656	0.62844	0.5123	0.96642
Ank	-0.446377	607	1345	8254	4	-0.045317	-0.12872	0.60015	0.90802	0.89758	0.99964	0.40106	1.1462	0.1375	0.61436	0.25171	0.96437
Ank2	-0.32248	1355	79	475	4	0.51557	1.4838	0.012306	0.29752	0.13786	0.99964	0.83805	2.4235	0.00034182	0.043478	0.015372	0.96437
Ankfy1	0.123318	8097	6658	3937	4	0.16945	0.67481	0.53358	0.88127	0.49979	0.99964	0.046132	0.18315	0.80653	0.96277	0.85468	0.98883
Ankhd1	-0.42973	677	3652	10372	4	-0.20825	-0.87141	0.20321	0.68757	0.38353	0.99964	0.22148	0.93007	0.56435	0.87691	0.35233	0.96437
Ankib1	0.068127	7229	6240	4482	4	0.14034	0.47042	0.64211	0.92174	0.63806	0.99964	0.072213	0.24187	0.89318	0.98102	0.80888	0.98555
Ankle1	-0.16567	3286	2063	4008	4	0.16511	0.77589	0.55042	0.8907	0.43782	0.99964	0.33078	1.5554	0.25645	0.71917	0.11985	0.96437
Ankle2	-0.24214	2219	6800	10349	4	-0.20569	-1.1475	0.20603	0.68881	0.25118	0.99964	0.03645	0.20344	0.77209	0.95069	0.83879	0.98621
Ankmy2	0.037576	6754	6293	5183	4	0.10596	0.40714	0.7873	0.96049	0.6839	0.99964	0.068384	0.26209	0.88088	0.9805	0.79325	0.98507
Ankra2	0.256178	9621	7516	2605	4	0.24722	0.96023	0.28619	0.75723	0.33694	0.99964	-0.0089585	-0.034591	0.62665	0.90187	0.97241	0.99752
Ankrd10	-0.04704	5222	1877	1934	4	0.29941	0.86955	0.17416	0.65827	0.38455	0.99964	0.34645	1.0059	0.22552	0.69876	0.31447	0.96437
Ankrd11	-0.166117	3276	4097	6850	4	0.027243	0.081514	0.87524	0.97602	0.93503	0.99964	0.19336	0.5791	0.65937	0.9125	0.56252	0.96642
Ankrd12	0.073741	7323	9314	8746	4	-0.075189	-0.35887	0.49915	0.86632	0.71969	0.99964	-0.14893	-0.70947	0.30029	0.74925	0.47803	0.96642
Ankrd13a	-0.177845	3091	3333	6106	4	0.062645	0.25633	0.97163	0.99527	0.79769	0.99964	0.24049	0.98636	0.50162	0.85909	0.32396	0.96437
Ankrd13b	0.041548	6820	8780	8451	4	-0.057502	-0.20434	0.55666	0.89086	0.83809	0.99964	-0.09905	-0.35132	0.3931	0.80436	0.72535	0.97435
Ankrd13c	0.171856	8704	7507	4032	4	0.16388	0.57602	0.55358	0.89086	0.5646	0.99964	-0.007976	-0.027913	0.62921	0.9027	0.97773	0.9982
Ankrd13d	-0.21783	2513	1459	3952	4	0.16885	0.58257	0.53589	0.88249	0.56018	0.99964	0.38668	1.3374	0.15852	0.64601	0.1811	0.96437
Ankrd16	-0.09022	4471	7707	9295	4	-0.11181	-0.60347	0.39583	0.82113	0.5462	0.99964	-0.02159	-0.11661	0.5899	0.88937	0.90717	0.99413
Ankrd17	-0.072602	4754	8022	9329	4	-0.11488	-0.41204	0.38575	0.81392	0.68031	0.99964	-0.042278	-0.15124	0.5329	0.86986	0.87978	0.99169
Ankrd23	-0.35661	1106	3089	9133	4	-0.10008	-0.45534	0.42685	0.83389	0.64886	0.99964	0.25653	1.1707	0.45146	0.83145	0.24171	0.96437
Ankrd24	-0.03105	5544	9434	10225	4	-0.19257	-0.831	0.22518	0.70546	0.40597	0.99964	-0.16152	-0.69561	0.27952	0.73423	0.48667	0.96642
Ankrd26	-0.323358	1346	2092	7291	4	0.0050824	0.010475	0.78816	0.96053	0.99164	0.99964	0.32844	0.68092	0.26209	0.72248	0.49592	0.96642
Ankrd27	-0.25798	2017	1655	5152	4	0.10794	0.3317	0.7791	0.95705	0.74012	0.99964	0.36592	1.1279	0.19039	0.67289	0.25935	0.96437
Ankrd28	0.183696	8859	8159	4650	4	0.13234	0.52714	0.67467	0.93079	0.5981	0.99964	-0.051356	-0.20372	0.51025	0.86286	0.83857	0.98621
Ankrd33b	0.04501	6868	4317	2950	4	0.22549	0.47726	0.3431	0.78865	0.63318	0.99964	0.18048	0.38127	0.70843	0.92872	0.703	0.97373
Ankrd37	-0.005236	5991	6812	6778	4	0.030639	0.11526	0.88831	0.97813	0.90824	0.99964	0.035875	0.13471	0.7703	0.95039	0.89284	0.99313
Ankrd39	0.22226	9281	8846	4958	4	0.11735	0.45047	0.7374	0.94523	0.65237	0.99964	-0.10491	-0.40023	0.3813	0.79736	0.68899	0.9733
Ankrd40	0.18654	8899	10675	9729	4	-0.14629	-0.67463	0.31542	0.77148	0.49991	0.99964	-0.33283	-1.5228	0.10716	0.56545	0.12781	0.96437
Ankrd42	-0.26123	1976	1470	4807	4	0.12428	0.45772	0.70928	0.94166	0.64715	0.99964	0.38551	1.4215	0.16031	0.64757	0.15517	0.96437
Ankrd44	-0.214595	2552	7812	10638	4	-0.24389	-1.3244	0.15707	0.63599	0.18538	0.99964	-0.029295	-0.15935	0.56674	0.87819	0.87339	0.99169
Ankrd46	0.223972	9300	10614	9103	4	-0.097568	-0.29504	0.43326	0.83582	0.76796	0.99964	-0.32154	-0.96724	0.11434	0.57598	0.33342	0.96437
Ankrd49	0.6463	11363	10891	2421	4	0.26179	0.72707	0.25167	0.72626	0.46718	0.99964	-0.38451	-1.0458	0.082123	0.52977	0.29565	0.96437
Ankrd50	-0.06109	4956	1996	2229	4	0.27524	1.0597	0.22039	0.70043	0.28928	0.99964	0.33633	1.2956	0.2456	0.71351	0.1951	0.96437
Ankrd52	-0.486498	463	832	7642	4	-0.012478	-0.025161	0.71979	0.94381	0.97993	0.99964	0.47402	0.97161	0.060844	0.49275	0.33125	0.96437
Ankrd54	0.36124	10404	11155	9161	4	-0.10202	-0.38293	0.42189	0.83045	0.70177	0.99964	-0.46326	-1.7208	0.055033	0.48212	0.085284	0.96437
Ankrd55	-0.32327	1347	4633	9892	4	-0.16126	-0.63063	0.28422	0.75505	0.52828	0.99964	0.16201	0.636	0.77884	0.95297	0.52478	0.96642
Ankrd6	-0.313425	1423	1469	5921	4	0.072105	0.23093	0.9289	0.98433	0.81737	0.99964	0.38553	1.2397	0.16023	0.64757	0.21509	0.96437
Ankrd63	0.15087	8437	2118	635	4	0.47711	1.3146	0.020851	0.3631	0.18864	0.99964	0.32624	0.89521	0.2673	0.72734	0.37068	0.96437
Ankrd9	0.08847	7541	8155	6625	4	0.037501	0.1791	0.91719	0.9809	0.85786	0.99964	-0.050969	-0.24242	0.51171	0.86398	0.80845	0.98555
Anks1	-0.0635593	4913	7503	8670	4	-0.071205	-0.30033	0.51273	0.87285	0.76393	0.99964	-0.0076457	-0.032233	0.63006	0.90311	0.97429	0.99775
Anks3	0.14172	8323	10190	9215	4	-0.10578	-0.41158	0.4113	0.82539	0.68064	0.99964	-0.2475	-0.95742	0.17236	0.65872	0.33836	0.96437
Ankzf1	-0.0288	5574	3340	3187	4	0.21131	0.8369	0.38934	0.81795	0.40265	0.99964	0.24011	0.9494	0.50273	0.85931	0.34242	0.96437
Anln	0.52292	11094	8815	894	4	0.42128	1.0756	0.04418	0.45752	0.28211	0.99964	-0.10164	-0.25587	0.38771	0.80191	0.79805	0.98555
Ano10	0.207049	9123	9562	6703	4	0.033959	0.14048	0.90258	0.97978	0.88828	0.99964	-0.17309	-0.71202	0.26184	0.72248	0.47645	0.96642
Ano6	0.441427	10829	8644	1367	4	0.35218	1.242	0.098872	0.57006	0.21424	0.99964	-0.089247	-0.31195	0.41309	0.81053	0.75508	0.97894
Ano8	-0.17244	3176	642	1475	4	0.34188	1.4101	0.10861	0.57453	0.15851	0.99964	0.51432	2.1205	0.037002	0.41762	0.033962	0.96437
Anp32a	-0.131463	3819	4459	6565	4	0.040867	0.14124	0.93309	0.9856	0.88768	0.99964	0.17233	0.59502	0.73859	0.93786	0.55183	0.96642
Anp32b	-0.0942	4402	1642	2256	4	0.27328	0.87918	0.22518	0.70546	0.3793	0.99964	0.36748	1.1808	0.18775	0.66839	0.23767	0.96437
Anp32e	-0.316441	1395	2284	7468	4	-0.0039309	-0.0085867	0.75141	0.94875	0.99315	0.99964	0.31251	0.68607	0.29781	0.74914	0.49267	0.96642
Anpep	0.36282	10419	8230	1847	4	0.30712	1.3979	0.16066	0.6411	0.16215	0.99964	-0.0557	-0.25158	0.49761	0.85784	0.80137	0.98555
Antkmt	-0.23754	2273	5521	9486	4	-0.12689	-0.52849	0.35695	0.79756	0.59716	0.99964	0.11065	0.46207	0.96667	0.99588	0.64403	0.97182
Antxr1	-0.36679	1042	10376	11640	4	-0.64317	-2.9077	0.024013	0.376	0.0036413	0.99964	-0.27638	-1.2539	0.14545	0.6267	0.20987	0.96437
Antxr2	-0.098552	4322	8788	10285	4	-0.19816	-1.199	0.21706	0.70043	0.23053	0.99964	-0.099608	-0.60207	0.3919	0.80417	0.54713	0.96642
Anxa1	0.08633	7511	3666	1853	4	0.30674	0.91404	0.16168	0.6431	0.36069	0.99964	0.22041	0.65495	0.56871	0.87924	0.5125	0.96642
Anxa11	-0.0736	4735	2624	3124	4	0.21484	0.6585	0.37763	0.81006	0.51022	0.99964	0.28844	0.88604	0.35917	0.78489	0.37559	0.96437
Anxa2	-0.32609	1323	793	4211	4	0.1551	0.5637	0.58537	0.90306	0.57296	0.99964	0.48119	1.7522	0.055632	0.48299	0.079738	0.96437
Anxa3	0.171232	8693	9763	7841	4	-0.023598	-0.10273	0.67937	0.93147	0.91818	0.99964	-0.19483	-0.84353	0.23116	0.70288	0.39893	0.96437
Anxa4	-0.22129	2480	173	601	4	0.4852	1.3251	0.018971	0.35016	0.18515	0.99964	0.70649	1.9327	0.0029055	0.16585	0.053273	0.96437
Anxa5	-0.189254	2930	3195	6148	4	0.060656	0.2444	0.98	0.99679	0.80692	0.99964	0.24991	1.0073	0.47043	0.8411	0.31381	0.96437
Anxa6	0.0511847	6960	7347	6296	4	0.053753	0.26259	0.98966	0.99793	0.79287	0.99964	0.0025683	0.012513	0.65903	0.91245	0.99002	0.99847
Anxa7	-0.40229	813	454	4023	4	0.1644	0.60587	0.55204	0.89086	0.5446	0.99964	0.56669	2.0977	0.0188	0.39855	0.035934	0.96437
Anxa9	0.13737	8263	5471	2557	4	0.25133	1.1198	0.27534	0.74584	0.26281	0.99964	0.11396	0.50556	0.95402	0.99218	0.61316	0.97075
Aoah	0.414357	10691	10822	6410	4	0.048677	0.1788	0.96719	0.99473	0.85809	0.99964	-0.36568	-1.3287	0.090241	0.54433	0.18393	0.96437
Aoc2	0.287752	9905	6148	1255	4	0.36481	1.44	0.086994	0.55616	0.14986	0.99964	0.077058	0.30203	0.90882	0.98354	0.76263	0.97921
Aopep	0.262775	9689	10214	7140	4	0.012425	0.041992	0.8173	0.96636	0.96651	0.99964	-0.25035	-0.84093	0.16852	0.65428	0.40039	0.96437
Aox1	-0.13072	3831	3917	5910	4	0.07253	0.27399	0.92702	0.98387	0.78409	0.99964	0.20325	0.76915	0.62323	0.90187	0.4418	0.96642
Aox3	-0.08428	4566	9063	10388	4	-0.20977	-0.89746	0.20091	0.68508	0.36947	0.99964	-0.12549	-0.53636	0.34285	0.77557	0.59171	0.97051
Ap1ar	-0.29106	1634	5696	10191	4	-0.18902	-0.8618	0.2315	0.71129	0.3888	0.99964	0.10204	0.46582	0.99735	0.99923	0.64134	0.97182
Ap1b1	0.27345	9774	11363	11064	4	-0.31792	-0.48523	0.095454	0.56557	0.62751	0.99964	-0.59137	-0.89693	0.033157	0.41738	0.36975	0.96437
Ap1g2	0.06237	7133	9556	9269	4	-0.11029	-0.56792	0.39993	0.82193	0.57009	0.99964	-0.17266	-0.88731	0.26226	0.72248	0.37491	0.96437
Ap1m1	-0.083585	4582	8614	9993	4	-0.17052	-0.77161	0.26517	0.73951	0.44035	0.99964	-0.086935	-0.39276	0.41796	0.81267	0.6945	0.9733
Ap1s1	-0.0940808	4403	7358	9010	4	-0.092428	-0.38965	0.44804	0.84214	0.69679	0.99964	0.0016528	0.0069655	0.65664	0.91058	0.99444	0.99868
Ap1s2	-0.13368	3782	9598	11032	4	-0.3113	-1.1927	0.099812	0.57006	0.23298	0.99964	-0.17762	-0.68371	0.25628	0.71917	0.49416	0.96642
Ap1s3	-0.25993	1999	5340	9637	4	-0.13858	-0.49377	0.33046	0.78277	0.62147	0.99964	0.12135	0.43571	0.92506	0.98633	0.66305	0.97301
Ap2a1	-0.161097	3360	8302	10479	4	-0.22286	-1.2388	0.18313	0.66574	0.2154	0.99964	-0.061763	-0.34372	0.48069	0.84503	0.73106	0.97535
Ap2a2	-0.26287	1947	5676	9880	4	-0.15967	-0.99422	0.28722	0.75743	0.32012	0.99964	0.1032	0.64394	0.99342	0.99785	0.51962	0.96642
Ap2b1	-0.160336	3372	3405	5834	4	0.075974	0.44655	0.9119	0.97992	0.6552	0.99964	0.23631	1.389	0.51632	0.86447	0.16484	0.96437
Ap2m1	0.32992	10209	9816	4718	4	0.12929	0.18417	0.6874	0.93426	0.85388	0.99964	-0.20063	-0.28239	0.22415	0.69859	0.77764	0.98203
Ap2s1	0.307276	10047	6241	1158	4	0.37948	1.0566	0.073663	0.52465	0.29072	0.99964	0.072204	0.19904	0.89318	0.98102	0.84223	0.98699
Ap3b1	0.51988	11083	10495	3017	4	0.22132	0.83386	0.35669	0.79756	0.40436	0.99964	-0.29856	-1.1063	0.12895	0.60056	0.26861	0.96437
Ap3d1	0.104076	7806	8374	6636	4	0.037001	0.11826	0.91454	0.98013	0.90586	0.99964	-0.067075	-0.21367	0.46565	0.83766	0.8308	0.98591
Ap3m1	-0.174901	3142	3415	6154	4	0.060489	0.19083	0.98077	0.99679	0.84866	0.99964	0.23539	0.74494	0.51863	0.86454	0.45631	0.96642
Ap3m2	-0.314054	1417	1491	5964	4	0.069686	0.22588	0.93941	0.9864	0.82129	0.99964	0.38374	1.2533	0.16262	0.64854	0.21011	0.96437
Ap3s1	-0.67165	135	847	10298	4	-0.19963	-0.82649	0.21518	0.69944	0.40853	0.99964	0.47202	1.9723	0.062212	0.4949	0.048573	0.96437
Ap3s2	-0.050877	5159	8663	9673	4	-0.14182	-0.77912	0.3243	0.77828	0.43591	0.99964	-0.090943	-0.49877	0.40959	0.80845	0.61794	0.97075
Ap4b1	-0.331517	1281	7889	11236	4	-0.36497	-1.6576	0.071526	0.52045	0.097399	0.99964	-0.033453	-0.15283	0.55426	0.87495	0.87853	0.99169
Ap4e1	-0.50337	424	1410	9286	4	-0.11123	-0.27114	0.3978	0.82164	0.78629	0.99964	0.39214	0.96782	0.15006	0.6358	0.33313	0.96437
Ap4m1	-0.17021	3202	1259	2685	4	0.24278	1.101	0.29739	0.76325	0.2709	0.99964	0.41299	1.874	0.11989	0.58632	0.060932	0.96437
Ap4s1	0.021261	6448	8224	8034	4	-0.034068	-0.10043	0.64194	0.92173	0.92001	0.99964	-0.055329	-0.16261	0.49872	0.85836	0.87082	0.9911
Ap5b1	0.190952	8941	7666	3891	4	0.17224	0.644	0.52299	0.87767	0.51957	0.99964	-0.018712	-0.069604	0.5981	0.89281	0.94451	0.99571
Ap5m1	0.21868	9246	8888	5115	4	0.10981	0.38202	0.772	0.95563	0.70244	0.99964	-0.10887	-0.37662	0.37395	0.7929	0.70646	0.97373
Ap5s1	-0.04256	5303	3474	3594	4	0.18955	0.62002	0.45881	0.84548	0.53524	0.99964	0.23211	0.75771	0.52923	0.86749	0.44863	0.96642
Ap5z1	0.49892	11032	10847	4778	4	0.12601	0.44267	0.70313	0.94034	0.65801	0.99964	-0.37291	-1.2917	0.08725	0.53846	0.19646	0.96437
Apaf1	0.052756	6981	5823	4344	4	0.148	0.68682	0.61323	0.91219	0.4922	0.99964	0.095244	0.441	0.97727	0.99704	0.65921	0.97206
Apba1	-0.014905	5810	8152	8574	4	-0.065738	-0.32598	0.53119	0.88127	0.74444	0.99964	-0.050833	-0.25164	0.51188	0.86398	0.80132	0.98555
Apba3	-0.12951	3854	3468	5244	4	0.10318	0.36365	0.79901	0.96244	0.71612	0.99964	0.23269	0.82031	0.52683	0.86678	0.41204	0.96642
Apbb1	-0.165864	3280	5095	7981	4	-0.031454	-0.13196	0.65091	0.92327	0.89501	0.99964	0.13441	0.5654	0.88002	0.98021	0.5718	0.96642
Apbb1ip	-0.04614	5240	495	510	4	0.50678	1.6812	0.014015	0.3112	0.092719	0.99964	0.55292	1.8329	0.023158	0.41119	0.066817	0.96437
Apbb2	0.148487	8403	8147	5346	4	0.097854	0.47848	0.82012	0.96755	0.63231	0.99964	-0.050633	-0.24667	0.51248	0.864	0.80517	0.98555
Apbb3	0.111132	7913	6447	3906	4	0.17101	0.62122	0.52829	0.88098	0.53446	0.99964	0.059878	0.21682	0.85156	0.97591	0.82835	0.98591
Apc	-0.32614	1322	3793	9330	4	-0.11496	-0.36188	0.3854	0.81349	0.71744	0.99964	0.21118	0.67056	0.59656	0.8926	0.5025	0.96642
Apcdd1	-0.14654	3588	2363	4102	4	0.16051	0.5761	0.56597	0.89628	0.56455	0.99964	0.30705	1.1035	0.31097	0.75498	0.26981	0.96437
Apcs	0.060692	7099	7533	6360	4	0.050863	0.18393	0.9759	0.99538	0.85407	0.99964	-0.009829	-0.035456	0.62382	0.90187	0.97172	0.99752
Apeh	-0.40609	793	328	3219	4	0.20965	0.86075	0.39395	0.82056	0.38938	0.99964	0.61574	2.534	0.0093146	0.28836	0.011278	0.96437
Apex1	0.12129	8067	3975	1700	4	0.32122	1.3166	0.13784	0.60914	0.18799	0.99964	0.19993	0.81596	0.63391	0.90452	0.41452	0.96642
Apex2	-0.008476	5940	8267	8601	4	-0.067211	-0.32307	0.52709	0.88077	0.74664	0.99964	-0.058735	-0.28184	0.48855	0.85074	0.77806	0.98203
Aph1a	0.70792	11450	11322	4289	4	0.15101	0.64796	0.60109	0.90802	0.51701	0.99964	-0.55691	-2.3572	0.036746	0.41762	0.018413	0.96437
Aph1b	-0.32652	1318	4982	10154	4	-0.18571	-0.6838	0.23808	0.71734	0.4941	0.99964	0.14081	0.52157	0.85746	0.9764	0.60197	0.97075
Aph1c	0.11967	8039	4036	1752	4	0.31658	0.98922	0.14476	0.61469	0.32256	0.99964	0.19691	0.61229	0.64468	0.90658	0.54034	0.96642
Apip	-0.04854	5198	9795	10660	4	-0.24704	-0.93383	0.15314	0.62837	0.35039	0.99964	-0.1985	-0.75017	0.22654	0.70003	0.45315	0.96642
Aplf	0.273129	9772	7949	2814	4	0.23516	0.89298	0.31619	0.77148	0.37187	0.99964	-0.037969	-0.14342	0.54384	0.8712	0.88596	0.99186
Apln	0.090343	7573	6965	5003	4	0.1159	0.51493	0.74389	0.94646	0.6066	0.99964	0.025557	0.11319	0.73526	0.93678	0.90988	0.99413
Aplp1	-0.02376	5666	1074	938	4	0.41546	1.4524	0.047428	0.46533	0.1464	0.99964	0.43922	1.535	0.092719	0.54899	0.12478	0.96437
Aplp2	-0.16074	3365	1572	3145	4	0.21379	0.97097	0.3813	0.81232	0.33157	0.99964	0.37453	1.701	0.17535	0.65936	0.088936	0.96437
Apmap	-0.11039	4140	909	1362	4	0.35257	1.1062	0.09853	0.57006	0.26862	0.99964	0.46296	1.4537	0.070244	0.51151	0.14603	0.96437
Apoa1	-0.35729	1099	3785	9714	4	-0.14549	-0.69813	0.31713	0.77173	0.4851	0.99964	0.2118	1.0189	0.59468	0.89161	0.30825	0.96437
Apoa2	0.327443	10193	8465	2544	4	0.25232	0.66856	0.27294	0.74504	0.50378	0.99964	-0.075123	-0.19752	0.44591	0.82668	0.84342	0.98699
Apoa4	0.171127	8691	7800	4430	4	0.14295	0.54138	0.63152	0.91881	0.58825	0.99964	-0.028177	-0.1062	0.56999	0.87984	0.91542	0.99413
Apoa5	-0.124198	3933	4721	6739	4	0.032332	0.16979	0.89549	0.97816	0.86517	0.99964	0.15653	0.82253	0.79909	0.96086	0.41078	0.96642
Apob	0.00733	6221	2861	2178	4	0.27887	1.014	0.21244	0.69668	0.31059	0.99964	0.27154	0.98579	0.40617	0.80828	0.32424	0.96437
Apobec1	-0.151463	3522	5726	8359	4	-0.051013	-0.2422	0.57956	0.90118	0.80863	0.99964	0.10045	0.4786	0.99547	0.99829	0.63222	0.97075
Apobec3	-0.227463	2403	7553	10606	4	-0.23886	-1.4023	0.16271	0.64426	0.16083	0.99964	-0.011397	-0.067051	0.6181	0.89985	0.94654	0.99571
Apobr	0.10457	7817	9890	9210	4	-0.10563	-0.37712	0.41164	0.82539	0.70608	0.99964	-0.2102	-0.74797	0.21065	0.68583	0.45448	0.96642
Apoc1	0.32969	10208	11560	11500	4	-0.47095	-1.762	0.039651	0.44023	0.078064	0.99964	-0.80064	-2.9625	0.022646	0.41119	0.0030512	0.79993
Apoc2	-0.04814	5205	4182	4492	4	0.13989	0.57645	0.64476	0.92307	0.56431	0.99964	0.18803	0.77383	0.6792	0.91906	0.43903	0.96642
Apoc3	0.322129	10149	10855	8391	4	-0.052751	-0.14172	0.5746	0.89977	0.8873	0.99964	-0.37488	-0.99851	0.086395	0.53594	0.31803	0.96437
Apoc4	-0.0361561	5441	6764	7329	4	0.0033749	0.018943	0.77944	0.95705	0.98489	0.99964	0.039531	0.2217	0.78303	0.95531	0.82455	0.98591
Apof	-0.46513	540	875	7355	4	0.0020805	0.0058254	0.77448	0.95611	0.99535	0.99964	0.46721	1.3138	0.06657	0.50812	0.18892	0.96437
Apoh	-0.273051	1834	8350	11147	4	-0.33798	-1.3618	0.084088	0.54911	0.17326	0.99964	-0.064929	-0.26226	0.47171	0.84159	0.79312	0.98507
Apol10b	0.187378	8912	8882	5755	4	0.079398	0.20143	0.89822	0.97924	0.84036	0.99964	-0.10798	-0.27212	0.37541	0.79425	0.78553	0.98405
Apol6	-0.154814	3474	4206	6757	4	0.031546	0.12217	0.89233	0.97813	0.90277	0.99964	0.18636	0.7216	0.68689	0.92295	0.47054	0.96642
Apol7a	-0.05386	5097	3229	3518	4	0.19364	0.91932	0.4448	0.84033	0.35793	0.99964	0.2475	1.1743	0.47667	0.84343	0.24027	0.96437
Apol9b	0.22575	9326	3174	631	4	0.47752	1.1386	0.020851	0.3631	0.25486	0.99964	0.25177	0.59646	0.46531	0.83731	0.55087	0.96642
Apold1	-0.2761	1806	1300	4667	4	0.13137	0.59863	0.67835	0.93136	0.54942	0.99964	0.40747	1.8644	0.12793	0.59912	0.06227	0.96437
Apom	-0.19376	2849	1051	2587	4	0.24842	0.69342	0.28243	0.75267	0.48805	0.99964	0.44218	1.2383	0.089643	0.54428	0.2156	0.96437
Apon	-0.0414199	5338	7335	8113	4	-0.03815	-0.1417	0.62767	0.91771	0.88732	0.99964	0.0032699	0.012149	0.66134	0.9138	0.99031	0.99847
Apoo	-0.35272	1133	5085	10437	4	-0.21762	-0.92955	0.19031	0.67301	0.35261	0.99964	0.1351	0.57833	0.87848	0.98021	0.56304	0.96642
Apool	0.20137	9048	5509	1790	4	0.31306	1.2698	0.15015	0.62261	0.20416	0.99964	0.11169	0.45019	0.9624	0.99418	0.65257	0.97206
App	-0.287607	1669	2530	7235	4	0.0077226	0.031658	0.79892	0.96244	0.97474	0.99964	0.29533	1.2163	0.34259	0.77557	0.22388	0.96437
Appbp2	-0.180682	3044	5798	8878	4	-0.083776	-0.36522	0.47214	0.85359	0.71494	0.99964	0.096906	0.42304	0.98282	0.99758	0.67227	0.9733
Appl1	-0.20568	2673	1418	3659	4	0.18505	0.63313	0.47402	0.85361	0.52665	0.99964	0.39073	1.3384	0.15228	0.63848	0.18076	0.96437
Appl2	-0.14296	3654	2479	4185	4	0.15645	0.51422	0.58076	0.90161	0.6071	0.99964	0.29941	0.98355	0.33208	0.77057	0.32534	0.96437
Aprt	0.315574	10104	10979	9017	4	-0.092556	-0.31357	0.44727	0.84214	0.75384	0.99964	-0.40813	-1.3705	0.07315	0.5181	0.17052	0.96437
Aptx	0.09302	7626	2906	1276	4	0.36221	1.1032	0.089216	0.55695	0.26992	0.99964	0.26919	0.81659	0.41292	0.8105	0.41416	0.96642
Aqp11	-0.31144	1443	853	4123	4	0.15971	0.6601	0.56836	0.89697	0.50919	0.99964	0.47115	1.9553	0.063323	0.5	0.050545	0.96437
Aqp3	-0.05782	5012	927	1021	4	0.40204	1.2918	0.056486	0.49146	0.19643	0.99964	0.45986	1.4768	0.073321	0.5181	0.13973	0.96437
Aqp8	-0.04267	5299	10743	11322	4	-0.3883	-1.6992	0.062126	0.50103	0.089283	0.99964	-0.34563	-1.5103	0.099897	0.55943	0.13097	0.96437
Aqp9	0.04894	6921	5048	3642	4	0.18611	0.6813	0.47129	0.85321	0.49568	0.99964	0.13717	0.50083	0.87002	0.97904	0.61649	0.97075
Aqr	0.47255	10947	11664	11648	4	-0.66965	-1.7455	0.022988	0.37139	0.080891	0.99964	-1.1422	-2.9006	0.0072637	0.26235	0.0037241	0.83806
Araf	-0.18821	2943	2472	5081	4	0.11167	0.53837	0.76337	0.95285	0.59032	0.99964	0.29988	1.4488	0.33063	0.76912	0.14739	0.96437
Arap1	-0.002831	6035	7545	7659	4	-0.013576	-0.059564	0.71518	0.94224	0.9525	0.99964	-0.010745	-0.047102	0.62015	0.90082	0.96243	0.99685
Arap3	-0.383622	911	2247	8619	4	-0.068172	-0.17544	0.5235	0.87815	0.86073	0.99964	0.31545	0.81771	0.29106	0.74437	0.41352	0.96642
Arcn1	0.22259	9282	10685	9294	4	-0.11166	-0.20904	0.39626	0.82162	0.83441	0.99964	-0.33425	-0.61981	0.10579	0.56375	0.53538	0.96642
Arel1	-0.000751	6076	8735	9086	4	-0.096476	-0.35315	0.43557	0.83582	0.72397	0.99964	-0.095725	-0.35022	0.40044	0.80772	0.72617	0.97435
Arf1	-0.1331	3794	279	537	4	0.4999	0.82231	0.015297	0.32369	0.4109	0.99964	0.633	1.0431	0.0072637	0.26235	0.29692	0.96437
Arf3	-0.0428738	5295	6825	7543	4	-0.0078418	-0.03734	0.73654	0.94523	0.97021	0.99964	0.035032	0.16671	0.76799	0.94951	0.8676	0.99077
Arf4	-0.221527	2475	7452	10503	4	-0.22552	-0.6693	0.17971	0.66257	0.50331	0.99964	-0.0039928	-0.01184	0.64049	0.90627	0.99055	0.99847
Arf5	-0.095789	4372	7887	9509	4	-0.12891	-0.61026	0.35285	0.79695	0.54169	0.99964	-0.033121	-0.15669	0.55503	0.87513	0.87549	0.99169
Arf6	-0.70716	106	824	10550	4	-0.23194	-0.66736	0.17236	0.65564	0.50454	0.99964	0.47522	1.3853	0.060332	0.49275	0.16595	0.96437
Arfgap1	0.020717	6439	8929	8984	4	-0.090853	-0.33677	0.45189	0.84284	0.73629	0.99964	-0.11157	-0.41225	0.36891	0.79214	0.68016	0.9733
Arfgap2	-0.55838	287	4887	11400	4	-0.41216	-1.5608	0.053837	0.48574	0.11856	0.99964	0.14622	0.55782	0.83772	0.97282	0.57697	0.96759
Arfgap3	-0.14959	3539	2673	4594	4	0.13516	0.48435	0.66442	0.92792	0.62814	0.99964	0.28475	1.0206	0.36823	0.79151	0.30745	0.96437
Arfgef1	-0.062294	4936	8651	9789	4	-0.15206	-0.5879	0.30303	0.76443	0.5566	0.99964	-0.089766	-0.3465	0.41172	0.80975	0.72897	0.97458
Arfgef2	-0.08428	4566	9305	10551	4	-0.232	-1.1697	0.17211	0.65539	0.24212	0.99964	-0.14772	-0.74448	0.30268	0.75101	0.45659	0.96642
Arfgef3	0.28059	9836	8857	3835	4	0.17507	1.1149	0.51111	0.87148	0.2649	0.99964	-0.10552	-0.66795	0.38036	0.79689	0.50416	0.96642
Arfip2	-0.136213	3739	3470	5381	4	0.096237	0.36001	0.82704	0.96975	0.71884	0.99964	0.23245	0.87017	0.52803	0.86744	0.38421	0.96437
Arfrp1	0.06444	7161	10715	10841	4	-0.2763	-0.8728	0.12665	0.59951	0.38277	0.99964	-0.34074	-1.0715	0.10289	0.56013	0.28397	0.96437
Arg1	0.68145	11405	11040	2449	4	0.25875	1.0917	0.25842	0.73295	0.27496	0.99964	-0.4227	-1.7655	0.067168	0.50907	0.077479	0.96437
Arglu1	-0.57559	255	6452	11550	4	-0.51585	-1.2433	0.0329	0.40776	0.21375	0.99964	0.05974	0.14721	0.85122	0.97591	0.88297	0.99186
Arhgap1	-0.01974	5724	3577	3297	4	0.20582	0.62864	0.40369	0.82255	0.52958	0.99964	0.22556	0.68826	0.55093	0.87381	0.49129	0.96642
Arhgap10	0.03635	6727	1280	785	4	0.44598	1.8375	0.0329	0.40776	0.066134	0.99964	0.40963	1.6838	0.12451	0.59397	0.092227	0.96437
Arhgap11a	0.379984	10514	10830	7137	4	0.012484	0.035221	0.81738	0.96636	0.9719	0.99964	-0.3675	-1.0267	0.089557	0.54428	0.30454	0.96437
Arhgap12	0.02277	6483	4492	3524	4	0.19322	0.60648	0.44659	0.84214	0.5442	0.99964	0.17045	0.53325	0.74688	0.94211	0.59386	0.97075
Arhgap15	0.196955	9006	8646	5156	4	0.10765	0.4034	0.77978	0.95705	0.68666	0.99964	-0.089305	-0.33247	0.41301	0.8105	0.73954	0.97634
Arhgap17	-0.197815	2788	4110	7499	4	-0.0054347	-0.024115	0.74594	0.94646	0.98076	0.99964	0.19238	0.85695	0.66305	0.91409	0.39147	0.96437
Arhgap18	0.099775	7744	7876	6009	4	0.067414	0.29081	0.94984	0.98959	0.7712	0.99964	-0.032361	-0.13898	0.55666	0.87513	0.88947	0.99264
Arhgap19	-0.135927	3742	8021	10072	4	-0.17817	-0.76487	0.25064	0.72473	0.44435	0.99964	-0.042243	-0.18162	0.53307	0.86988	0.85588	0.98883
Arhgap21	0.05929	7084	2660	1432	4	0.34538	1.1589	0.10494	0.57453	0.24651	0.99964	0.28609	0.95774	0.36481	0.78677	0.33819	0.96437
Arhgap22	-0.09338	4421	2465	3269	4	0.20712	0.68723	0.40096	0.82207	0.49194	0.99964	0.3005	0.9973	0.32849	0.76696	0.31862	0.96437
Arhgap24	-0.28739	1673	7078	10792	4	-0.26867	-1.3434	0.13365	0.60398	0.17914	0.99964	0.01872	0.094051	0.71039	0.9289	0.92507	0.99432
Arhgap25	-0.050391	5166	4933	5442	4	0.093659	0.53005	0.83712	0.97043	0.59608	0.99964	0.14405	0.81383	0.84609	0.97441	0.41574	0.96642
Arhgap27	0.16253	8584	5103	1966	4	0.29667	1.1049	0.17792	0.66014	0.26921	0.99964	0.13414	0.49684	0.88079	0.9805	0.6193	0.97075
Arhgap29	0.3381	10249	9838	4583	4	0.13541	0.53457	0.66288	0.92667	0.59294	0.99964	-0.20269	-0.79445	0.22176	0.6984	0.42694	0.96642
Arhgap30	-0.475113	506	964	7789	4	-0.020513	-0.090485	0.69099	0.9348	0.9279	0.99964	0.4546	2.0104	0.077337	0.52041	0.044385	0.96437
Arhgap31	-0.49406	441	155	2908	4	0.22826	0.61684	0.3361	0.78519	0.53734	0.99964	0.72232	1.9653	0.0024782	0.16292	0.049381	0.96437
Arhgap33	0.01452	6353	5581	4852	4	0.12217	0.57267	0.71774	0.94265	0.56687	0.99964	0.10765	0.50317	0.97607	0.99686	0.61485	0.97075
Arhgap35	0.38331	10528	8458	1829	4	0.30875	0.8476	0.15775	0.63699	0.39666	0.99964	-0.07456	-0.20287	0.44736	0.82793	0.83923	0.98621
Arhgap39	-0.2432	2205	353	1272	4	0.36264	0.9673	0.088959	0.55695	0.33339	0.99964	0.60584	1.6213	0.010511	0.30597	0.10494	0.96437
Arhgap4	-0.063704	4908	5171	6021	4	0.066916	0.24096	0.95257	0.9904	0.80959	0.99964	0.13062	0.4699	0.89233	0.98102	0.63842	0.97075
Arhgap44	0.13835	8276	10043	8979	4	-0.09046	-0.45914	0.45266	0.8432	0.64613	0.99964	-0.22881	-1.1552	0.19108	0.67289	0.24801	0.96437
Arhgap45	-0.43706	648	2033	9186	4	-0.1038	-0.40217	0.41642	0.82776	0.68756	0.99964	0.33326	1.3045	0.25064	0.71449	0.19207	0.96437
Arhgap5	0.16905	8666	2408	655	4	0.47248	1.6421	0.022475	0.37119	0.10056	0.99964	0.30343	1.0505	0.32046	0.76359	0.29347	0.96437
Arhgap6	-0.21558	2539	4028	7746	4	-0.01807	-0.069853	0.70108	0.94024	0.94431	0.99964	0.19751	0.76567	0.64186	0.90627	0.44387	0.96642
Arhgap8	0.088454	7539	8233	6740	4	0.032326	0.094813	0.89549	0.97816	0.92446	0.99964	-0.056128	-0.16423	0.49667	0.85744	0.86955	0.99077
Arhgap9	0.037876	6761	6667	5668	4	0.083403	0.3468	0.88241	0.97808	0.72874	0.99964	0.045527	0.18885	0.80482	0.96212	0.85021	0.98798
Arhgdia	0.136265	8251	7585	4840	4	0.12261	0.54571	0.71646	0.94263	0.58527	0.99964	-0.013655	-0.060552	0.6116	0.89709	0.95172	0.9959
Arhgdib	-0.34216	1207	5440	10514	4	-0.22659	-1.0313	0.1786	0.66014	0.30238	0.99964	0.11557	0.52725	0.94727	0.98982	0.59802	0.97075
Arhgdig	-0.008674	5935	6927	7005	4	0.019733	0.090205	0.84635	0.97075	0.92812	0.99964	0.028407	0.12954	0.74466	0.94053	0.89693	0.99373
Arhgef1	-0.40527	798	1110	6840	4	0.02785	0.11302	0.87754	0.97682	0.91001	0.99964	0.43312	1.7656	0.097761	0.55561	0.077456	0.96437
Arhgef10	-0.18378	3006	1868	4052	4	0.16305	0.46986	0.55674	0.89086	0.63846	0.99964	0.34683	1.0017	0.22424	0.69859	0.31647	0.96437
Arhgef10l	-0.53678	329	2803	10747	4	-0.26137	-1.1074	0.13938	0.61247	0.26814	0.99964	0.27541	1.1843	0.39421	0.80436	0.23631	0.96437
Arhgef11	-0.31466	1413	1204	5171	4	0.10689	0.42828	0.78371	0.95871	0.66844	0.99964	0.42155	1.6965	0.10947	0.56801	0.089797	0.96437
Arhgef12	-0.435663	651	947	6996	4	0.020277	0.064415	0.84832	0.97076	0.94864	0.99964	0.45594	1.4543	0.076397	0.52041	0.14585	0.96437
Arhgef15	-0.23321	2331	1033	3175	4	0.21207	0.92633	0.38626	0.81471	0.35427	0.99964	0.44528	1.9471	0.086225	0.53594	0.051527	0.96437
Arhgef17	-0.454882	573	1748	9109	4	-0.098092	-0.39446	0.43172	0.83559	0.69324	0.99964	0.35679	1.4458	0.20578	0.68147	0.14824	0.96437
Arhgef18	-0.011014	5880	7873	8215	8	-0.043297	-0.28444	0.5088	0.87084	0.77607	0.99964	-0.032283	-0.21175	0.45702	0.83349	0.8323	0.98591
Arhgef19	0.122944	8091	6664	3955	4	0.16864	0.76962	0.53657	0.88312	0.44153	0.99964	0.045696	0.20776	0.80516	0.96212	0.83542	0.98591
Arhgef2	-0.059033	4992	5369	6158	4	0.060437	0.34095	0.9812	0.99679	0.73314	0.99964	0.11947	0.67341	0.93266	0.98725	0.50069	0.96642
Arhgef25	0.03719	6747	9506	9538	4	-0.13074	-0.36967	0.34857	0.79359	0.71163	0.99964	-0.16793	-0.47376	0.27012	0.72838	0.63567	0.97075
Arhgef3	-0.02474	5647	1650	1476	4	0.34176	1.0245	0.1087	0.57453	0.30561	0.99964	0.3665	1.0949	0.18894	0.67041	0.27356	0.96437
Arhgef33	0.323422	10166	8292	2413	4	0.26238	0.63189	0.24962	0.72356	0.52746	0.99964	-0.061042	-0.14567	0.48248	0.84584	0.88418	0.99186
Arhgef37	-0.07973	4648	2712	3364	4	0.2023	0.90364	0.41557	0.82746	0.36618	0.99964	0.28203	1.2594	0.37549	0.79429	0.20789	0.96437
Arhgef39	-0.05706	5031	2709	2953	4	0.22533	0.78497	0.34353	0.78916	0.43247	0.99964	0.28239	0.98274	0.37489	0.79406	0.32573	0.96437
Arhgef40	-0.32105	1369	471	2721	4	0.24058	0.6643	0.30311	0.76443	0.5065	0.99964	0.56163	1.5556	0.020338	0.40541	0.11979	0.96437
Arhgef6	0.060992	7106	7137	5824	4	0.076338	0.36641	0.91061	0.97992	0.71406	0.99964	0.015346	0.073473	0.70031	0.92711	0.94143	0.99565
Arhgef7	-0.267835	1900	2188	6339	4	0.052015	0.187	0.98171	0.99679	0.85166	0.99964	0.31985	1.153	0.27952	0.73423	0.24892	0.96437
Arhgef9	-0.261616	1972	2485	6632	4	0.037174	0.14766	0.91574	0.9808	0.88261	0.99964	0.29879	1.1907	0.33353	0.77104	0.23377	0.96437
Arid1a	0.6766	11400	11455	7104	4	0.01472	0.045268	0.82772	0.9698	0.96389	0.99964	-0.66188	-1.9792	0.027858	0.41119	0.047789	0.96437
Arid1b	-0.00738	5960	3984	3549	4	0.19185	0.53674	0.45103	0.84283	0.59145	0.99964	0.19923	0.55833	0.63622	0.90562	0.57662	0.96759
Arid2	0.0541	7004	3506	2116	4	0.28413	1.2227	0.20116	0.68508	0.22144	0.99964	0.23003	0.98693	0.53581	0.86988	0.32368	0.96437
Arid3a	0.12171	8075	4802	2254	4	0.27349	1.1178	0.22475	0.70509	0.26365	0.99964	0.15178	0.61851	0.81584	0.96493	0.53624	0.96642
Arid3b	0.02006	6427	4858	3954	4	0.16866	0.68735	0.53657	0.88312	0.49186	0.99964	0.1486	0.60536	0.82832	0.96823	0.54494	0.96642
Arid4a	-0.18707	2966	792	1992	4	0.29417	0.8891	0.18236	0.66542	0.37395	0.99964	0.48124	1.4559	0.055546	0.48299	0.14543	0.96437
Arid4b	0.031376	6635	8733	8549	4	-0.06427	-0.27016	0.53589	0.88249	0.78704	0.99964	-0.095646	-0.40066	0.40053	0.80772	0.68867	0.9733
Arid5a	0.249489	9574	7351	2554	4	0.25156	1.0576	0.27448	0.74584	0.29022	0.99964	0.0020711	0.0086589	0.65715	0.9106	0.99309	0.99868
Arid5b	0.433053	10781	7543	887	4	0.42256	1.266	0.043582	0.45617	0.20551	0.99964	-0.010493	-0.031139	0.62143	0.90158	0.97516	0.99775
Arih1	0.048856	6916	8993	8645	4	-0.069814	-0.21731	0.51812	0.87576	0.82797	0.99964	-0.11867	-0.36744	0.35455	0.78121	0.71329	0.97403
Arih2	-0.461631	552	681	6504	4	0.043509	0.19824	0.94343	0.98695	0.84285	0.99964	0.50514	2.3112	0.042386	0.44128	0.020822	0.96437
Arl1	0.29604	9973	11236	10386	4	-0.20959	-0.58373	0.20099	0.68508	0.5594	0.99964	-0.50563	-1.3946	0.044608	0.44923	0.16314	0.96437
Arl10	-0.102192	4262	7265	9040	4	-0.094168	-0.29736	0.44163	0.83842	0.76619	0.99964	0.0080242	0.025454	0.67467	0.91792	0.97969	0.99847
Arl11	-0.0725	4757	1356	1632	4	0.32682	0.85593	0.12947	0.6027	0.39204	0.99964	0.39932	1.0443	0.13963	0.61721	0.29633	0.96437
Arl13b	-0.0799878	4643	7302	8737	4	-0.074655	-0.3371	0.50128	0.86749	0.73604	0.99964	0.0053328	0.024094	0.66775	0.91649	0.98078	0.99847
Arl15	-0.48332	474	3275	10603	4	-0.2384	-1.0299	0.16296	0.64426	0.30304	0.99964	0.24492	1.0658	0.48453	0.84735	0.28649	0.96437
Arl16	-0.15454	3482	1763	3390	4	0.20105	0.62185	0.42001	0.82968	0.53404	0.99964	0.35559	1.1014	0.208	0.68346	0.27073	0.96437
Arl2	0.589386	11240	5814	164	4	0.68509	1.1935	0.0015382	0.10112	0.23266	0.99964	0.095704	0.16373	0.97872	0.99704	0.86994	0.99077
Arl2bp	-0.125594	3916	7316	9417	4	-0.12126	-0.43613	0.36959	0.80483	0.66274	0.99964	0.0043338	0.015581	0.66493	0.91498	0.98757	0.99847
Arl3	-0.11273	4109	1192	1816	4	0.31052	1.2225	0.15433	0.62993	0.22153	0.99964	0.42325	1.6656	0.1081	0.56695	0.095788	0.96437
Arl4a	-0.303532	1514	6442	10634	4	-0.24321	-0.79097	0.15775	0.63699	0.42896	0.99964	0.060322	0.19649	0.85302	0.9764	0.84422	0.98699
Arl4c	0.251803	9588	9996	6829	4	0.028303	0.091499	0.87882	0.97682	0.9271	0.99964	-0.2235	-0.71627	0.19655	0.67542	0.47382	0.96642
Arl4d	0.28973	9927	11379	11041	4	-0.31242	-1.3206	0.098957	0.57006	0.18664	0.99964	-0.60215	-2.523	0.032046	0.41685	0.011637	0.96437
Arl5a	0.081828	7447	6825	4973	4	0.11686	0.58882	0.73945	0.94601	0.55598	0.99964	0.035032	0.17601	0.76799	0.94951	0.86028	0.98897
Arl5b	-0.311315	1445	1337	5524	4	0.090425	0.37162	0.85037	0.97089	0.71017	0.99964	0.40174	1.6558	0.13622	0.61167	0.097759	0.96437
Arl5c	0.03929	6786	3350	2181	4	0.27876	0.84874	0.2127	0.69668	0.39602	0.99964	0.23947	0.72719	0.50487	0.8601	0.46711	0.96642
Arl6	-0.318523	1385	2079	7160	4	0.010887	0.0439	0.81157	0.96426	0.96498	0.99964	0.32941	1.3347	0.25987	0.72233	0.18197	0.96437
Arl6ip1	0.220259	9262	9694	6721	4	0.033169	0.14629	0.89882	0.97924	0.88369	0.99964	-0.18709	-0.8198	0.24227	0.71124	0.41233	0.96642
Arl6ip4	-0.36856	1031	331	2615	4	0.24683	0.91881	0.28747	0.75743	0.35819	0.99964	0.61539	2.2979	0.0093146	0.28836	0.021569	0.96437
Arl6ip5	0.133261	8217	9615	8266	4	-0.045769	-0.23065	0.59827	0.90802	0.81759	0.99964	-0.17903	-0.89912	0.25406	0.7186	0.36859	0.96437
Arl6ip6	0.151502	8444	9831	8346	4	-0.050428	-0.1572	0.58152	0.90161	0.87509	0.99964	-0.20193	-0.6261	0.22312	0.6984	0.53125	0.96642
Arl8a	-0.436661	650	838	6640	4	0.036779	0.13894	0.91352	0.97992	0.88949	0.99964	0.47344	1.799	0.06093	0.49275	0.072019	0.96437
Arl8b	0.60874	11291	9008	586	4	0.48862	1.5026	0.018031	0.3459	0.13293	0.99964	-0.12012	-0.36355	0.35285	0.78088	0.71619	0.97419
Armc10	-0.19964	2755	1442	3610	4	0.18836	0.70352	0.46334	0.84832	0.48173	0.99964	0.388	1.4512	0.15664	0.6452	0.14671	0.96437
Armc2	-0.23235	2339	9273	11276	4	-0.37722	-1.672	0.066313	0.51019	0.094526	0.99964	-0.14487	-0.64425	0.30653	0.75231	0.51941	0.96642
Armc3	0.129313	8176	7894	5402	4	0.095235	0.47616	0.83097	0.97043	0.63396	0.99964	-0.034078	-0.1698	0.55281	0.87431	0.86516	0.99077
Armc5	0.136716	8256	7509	4728	4	0.12871	0.35625	0.68988	0.9348	0.72165	0.99964	-0.0080062	-0.022054	0.62912	0.9027	0.98241	0.99847
Armc6	0.43502	10797	11581	11406	4	-0.41478	-1.3898	0.053324	0.48574	0.16458	0.99964	-0.8498	-2.8045	0.020851	0.40871	0.00504	0.88889
Armc7	0.042615	6834	5947	4695	4	0.13015	0.34813	0.68373	0.93295	0.72774	0.99964	0.087535	0.23388	0.94702	0.98982	0.81508	0.98591
Armc8	0.069975	7260	6426	4678	4	0.13097	0.69201	0.68014	0.93175	0.48893	0.99964	0.060995	0.32139	0.85575	0.9764	0.74791	0.97751
Armc9	0.248	9554	5463	1273	4	0.36249	1.1	0.08913	0.55695	0.27135	0.99964	0.11449	0.3449	0.95155	0.9911	0.73017	0.97496
Armcx3	0.0011172	6112	7254	7190	4	0.0098453	0.045092	0.80764	0.96399	0.96403	0.99964	0.0087281	0.0399	0.67681	0.91866	0.96817	0.99726
Armcx5	-0.100342	4295	4793	6345	4	0.051818	0.17168	0.98094	0.99679	0.86369	0.99964	0.15216	0.50362	0.81388	0.96485	0.61453	0.97075
Armh3	-0.19533	2833	9151	11109	4	-0.32829	-1.0045	0.089899	0.55695	0.31515	0.99964	-0.13296	-0.40861	0.32917	0.76718	0.68282	0.9733
Armt1	-0.144926	3611	3550	5696	4	0.082344	0.35193	0.88677	0.97813	0.72489	0.99964	0.22727	0.97215	0.54444	0.87155	0.33098	0.96437
Arnt	0.06006	7093	3241	1845	4	0.30716	0.92916	0.16049	0.64096	0.35281	0.99964	0.2471	0.74535	0.47795	0.84371	0.45606	0.96642
Arnt2	-0.160346	3371	5961	8710	4	-0.073418	-0.26406	0.50513	0.86875	0.79173	0.99964	0.086928	0.31292	0.9448	0.98979	0.75434	0.97894
Arntl	-0.10646	4207	3739	5137	4	0.10869	0.51472	0.77636	0.95705	0.60675	0.99964	0.21515	1.0183	0.584	0.88592	0.30852	0.96437
Arpc1a	0.00242	6134	2411	1863	4	0.30567	1.1815	0.16348	0.64476	0.23741	0.99964	0.30325	1.1696	0.32097	0.76367	0.24216	0.96437
Arpc1b	0.0200725	6429	7569	7244	4	0.0073515	0.02617	0.7973	0.96205	0.97912	0.99964	-0.012721	-0.045246	0.61434	0.8984	0.96391	0.99685
Arpc2	-0.60848	212	2346	10971	4	-0.30035	-0.56685	0.10827	0.57453	0.57081	0.99964	0.30813	0.58841	0.30807	0.75355	0.55625	0.96642
Arpc3	0.204482	9093	7103	2999	4	0.22214	0.61447	0.35464	0.79754	0.5389	0.99964	0.017658	0.04844	0.70637	0.92743	0.96137	0.99671
Arpc4	-0.467204	531	8480	11578	4	-0.54296	-1.0899	0.029824	0.40206	0.27574	0.99964	-0.075756	-0.15293	0.44445	0.82668	0.87846	0.99169
Arpc5	-0.007148	5964	6896	6923	4	0.023509	0.10091	0.86079	0.9723	0.91962	0.99964	0.030657	0.13132	0.75132	0.9438	0.89552	0.9934
Arpc5l	0.0508925	6957	7523	6543	4	0.041811	0.14417	0.93676	0.98623	0.88537	0.99964	-0.0090815	-0.031289	0.62605	0.90187	0.97504	0.99775
Arpin	-0.31854	1384	498	2825	4	0.23388	0.7485	0.32046	0.77559	0.45416	0.99964	0.55242	1.7706	0.023244	0.41119	0.07662	0.96437
Arpp19	-0.2279	2398	10781	11602	4	-0.58448	-1.5851	0.026406	0.38433	0.11294	0.99964	-0.35658	-0.97169	0.095625	0.55353	0.3312	0.96437
Arrb1	-0.06428	4898	2071	2362	4	0.26619	0.905	0.24252	0.72039	0.36546	0.99964	0.33047	1.1223	0.25731	0.7193	0.26174	0.96437
Arrb2	-0.51873	373	2168	10273	4	-0.19708	-0.92307	0.21894	0.70043	0.35597	0.99964	0.32165	1.5139	0.27645	0.73324	0.13005	0.96437
Arrdc1	-0.18806	2945	2259	4770	4	0.12643	0.40756	0.7015	0.94024	0.68359	0.99964	0.31449	1.0158	0.29397	0.74696	0.30972	0.96437
Arrdc2	0.25755	9635	10250	7358	4	0.00191	0.0068996	0.77388	0.95598	0.99449	0.99964	-0.25564	-0.91685	0.1639	0.64923	0.35922	0.96437
Arrdc3	0.029529	6603	6237	5263	4	0.10198	0.36461	0.80388	0.96399	0.7154	0.99964	0.072451	0.25851	0.89352	0.98102	0.79601	0.98539
Arsa	-0.084905	4551	4376	5490	4	0.091855	0.37696	0.84481	0.97075	0.7062	0.99964	0.17676	0.72573	0.72193	0.93307	0.468	0.96642
Arsb	-0.16244	3332	1701	3416	4	0.19931	0.56044	0.42514	0.83339	0.57518	0.99964	0.36175	1.0184	0.19757	0.67542	0.30849	0.96437
Arsg	-0.23116	2360	1346	3936	4	0.16954	0.75202	0.53324	0.88127	0.45204	0.99964	0.4007	1.7819	0.13775	0.61456	0.07477	0.96437
Arsk	0.0884477	7538	8699	7486	4	-0.0048393	-0.021587	0.74756	0.94716	0.98278	0.99964	-0.093287	-0.41489	0.40497	0.80828	0.67822	0.9733
Art2b	-0.36834	1032	5484	10704	4	-0.25507	-1.1059	0.14468	0.61469	0.26879	0.99964	0.11327	0.49463	0.95693	0.99308	0.62086	0.97075
Art3	0.39609	10598	10029	3939	4	0.16943	0.59761	0.53367	0.88127	0.5501	0.99964	-0.22666	-0.79116	0.1939	0.67414	0.42885	0.96642
Arv1	0.281671	9846	7491	2235	4	0.27493	0.89493	0.22107	0.70127	0.37083	0.99964	-0.0067413	-0.021746	0.63194	0.90375	0.98265	0.99847
Arvcf	0.11158	7922	5183	2697	4	0.24176	0.8238	0.30021	0.76443	0.41005	0.99964	0.13018	0.44234	0.89429	0.98102	0.65824	0.97206
Asah1	-0.1727	3173	1298	2815	4	0.23508	0.8461	0.31661	0.77173	0.3975	0.99964	0.40778	1.4679	0.12741	0.5988	0.14214	0.96437
Asah2	0.097768	7708	6561	4310	4	0.14962	0.55956	0.60622	0.90988	0.57578	0.99964	0.051852	0.19319	0.82447	0.96644	0.84681	0.98699
Asap1	-0.06037	4973	3931	4446	4	0.14226	0.46785	0.63382	0.91941	0.63989	0.99964	0.20263	0.6654	0.62536	0.90187	0.5058	0.96642
Asap2	-0.004293	6010	7721	7904	4	-0.026993	-0.12741	0.66689	0.92883	0.89862	0.99964	-0.0227	-0.10695	0.58622	0.88722	0.91483	0.99413
Asap3	-0.041523	5334	8083	8932	4	-0.087471	-0.48245	0.4624	0.84832	0.62949	0.99964	-0.045948	-0.25328	0.52401	0.86678	0.80005	0.98555
Asb1	-0.15642	3444	2955	5130	4	0.10918	0.38664	0.7744	0.95611	0.69902	0.99964	0.2656	0.94128	0.42249	0.81369	0.34656	0.96437
Asb10	0.59783	11262	9655	950	4	0.41445	1.9812	0.048026	0.46573	0.047568	0.99964	-0.18338	-0.86727	0.24808	0.71411	0.3858	0.96437
Asb13	-0.34267	1202	354	2410	4	0.26261	0.84753	0.24902	0.72356	0.3967	0.99964	0.60528	1.9608	0.010596	0.30617	0.049904	0.96437
Asb3	0.183801	8863	7977	4410	4	0.14425	0.73927	0.62682	0.91723	0.45974	0.99964	-0.039551	-0.20199	0.54051	0.87119	0.83993	0.98638
Asb4	0.383542	10530	10525	5757	4	0.079362	0.33376	0.89839	0.97924	0.73856	0.99964	-0.30418	-1.2683	0.12485	0.59431	0.2047	0.96437
Asb5	-0.11371	4091	9920	11108	4	-0.32825	-1.4995	0.089899	0.55695	0.13374	0.99964	-0.21454	-0.98017	0.20518	0.68036	0.327	0.96437
Asb6	0.014874	6357	8344	8334	4	-0.049682	-0.21458	0.58383	0.90263	0.8301	0.99964	-0.064556	-0.27779	0.47274	0.84239	0.78117	0.98221
Asb7	-0.02206	5696	10604	11164	4	-0.34164	-1.6713	0.082208	0.54747	0.094662	0.99964	-0.31958	-1.5645	0.11511	0.57663	0.11771	0.96437
Asb8	-0.21675	2528	883	2578	4	0.24947	0.95142	0.27961	0.74891	0.34139	0.99964	0.46622	1.7809	0.067424	0.50932	0.074928	0.96437
Ascc1	0.0964704	7678	7248	5195	4	0.1054	0.42932	0.78978	0.96053	0.66769	0.99964	0.0089296	0.036254	0.67741	0.91866	0.97108	0.99752
Ascc2	-0.247641	2154	3864	8174	4	-0.041271	-0.11762	0.61519	0.91358	0.90637	0.99964	0.20637	0.59151	0.61357	0.89795	0.55418	0.96642
Ascc3	1.20546	11675	10228	30	4	0.95221	1.8311	0	0	0.067091	0.99964	-0.25325	-0.47041	0.16561	0.64925	0.63806	0.97075
Asf1a	0.3528	10351	9444	3572	4	0.19065	0.80885	0.45471	0.84374	0.4186	0.99964	-0.16215	-0.68361	0.27841	0.73395	0.49422	0.96642
Asf1b	0.00326	6145	5622	5139	4	0.10863	0.44983	0.77679	0.95705	0.65283	0.99964	0.10537	0.43533	0.98487	0.99758	0.66332	0.97301
Asgr1	0.12101	8060	5356	2703	4	0.2413	1.0123	0.30115	0.76443	0.31138	0.99964	0.12029	0.50305	0.92933	0.98725	0.61493	0.97075
Asgr2	0.127671	8154	6323	3506	4	0.19434	0.73116	0.44266	0.83927	0.46468	0.99964	0.066669	0.24999	0.87524	0.98021	0.8026	0.98555
Ash1l	0.16864	8657	11217	11102	4	-0.32688	-1.286	0.090497	0.55695	0.19843	0.99964	-0.49552	-1.9431	0.046915	0.45674	0.052005	0.96437
Ash2l	0.1096	7895	197	82	4	0.79011	1.1413	0.00017091	0.022727	0.25374	0.99964	0.68051	0.97787	0.0042728	0.2193	0.32814	0.96437
Asic1	0.52724	11106	10360	2498	4	0.25485	0.92024	0.26696	0.7416	0.35745	0.99964	-0.27239	-0.97083	0.14844	0.63325	0.33163	0.96437
Asl	-0.30434	1508	449	2393	4	0.26385	0.62533	0.24705	0.72356	0.53175	0.99964	0.56819	1.3511	0.018715	0.39818	0.17666	0.96437
Asns	0.47483	10955	8061	852	4	0.42988	1.0716	0.039908	0.44223	0.28391	0.99964	-0.04495	-0.11033	0.52658	0.86678	0.91214	0.99413
Asnsd1	-0.662255	145	327	8253	4	-0.045315	-0.10865	0.60015	0.90802	0.91348	0.99964	0.61694	1.4962	0.0091437	0.28836	0.1346	0.96437
Asph	-0.40326	810	3240	9845	4	-0.15613	-0.52873	0.29431	0.76166	0.597	0.99964	0.24713	0.84203	0.4777	0.84371	0.39977	0.96437
Aspm	0.225631	9321	9513	6230	4	0.057181	0.19821	0.99667	0.99889	0.84288	0.99964	-0.16845	-0.57972	0.26884	0.72814	0.56211	0.96642
Aspscr1	0.277309	9806	6407	1498	4	0.33928	1.2545	0.1122	0.58226	0.20968	0.99964	0.061971	0.22742	0.85866	0.9764	0.8201	0.98591
Asrgl1	-0.395178	852	797	5620	4	0.085652	0.27415	0.87122	0.97522	0.78397	0.99964	0.48083	1.5443	0.055802	0.48299	0.12251	0.96437
Ass1	-0.025226	5640	6149	6346	4	0.051812	0.23627	0.98086	0.99679	0.81322	0.99964	0.077038	0.35096	0.90856	0.98354	0.72562	0.97435
Aste1	0.54032	11130	11464	9498	4	-0.12806	-0.55586	0.35507	0.79754	0.57831	0.99964	-0.66838	-2.8669	0.027602	0.41119	0.0041453	0.85431
Asxl1	0.72429	11468	11382	4863	4	0.12166	0.51015	0.72013	0.94381	0.60995	0.99964	-0.60263	-2.4809	0.032046	0.41685	0.013104	0.96437
Asxl2	0.07798	7390	4935	3003	4	0.22194	0.77197	0.35507	0.79754	0.44013	0.99964	0.14396	0.49937	0.84669	0.97462	0.61752	0.97075
Atad1	0.332826	10221	10221	5725	4	0.080886	0.29433	0.89344	0.97813	0.76851	0.99964	-0.25194	-0.9083	0.16672	0.65077	0.36372	0.96437
Atad2	0.55039	11160	10141	1835	4	0.30805	0.81731	0.15903	0.6393	0.41375	0.99964	-0.24234	-0.63456	0.17783	0.65959	0.52572	0.96642
Atad2b	-0.54712	308	182	4281	4	0.15118	0.35313	0.60075	0.90802	0.72399	0.99964	0.6983	1.6485	0.0029055	0.16585	0.099246	0.96437
Atad3a	0.50759	11053	7934	664	4	0.47069	0.99299	0.022902	0.37119	0.32072	0.99964	-0.0369	-0.076421	0.5458	0.87171	0.93908	0.99565
Atad5	-0.33745	1239	9891	11583	4	-0.54771	-2.0821	0.029311	0.40206	0.037332	0.99964	-0.21026	-0.80458	0.21065	0.68583	0.42106	0.96642
Atat1	0.057848	7063	5875	4309	4	0.14967	0.65462	0.60596	0.90988	0.51271	0.99964	0.091822	0.40034	0.96505	0.99542	0.6889	0.9733
Ate1	-0.324111	1337	1625	6480	4	0.044889	0.21955	0.95009	0.98959	0.82622	0.99964	0.369	1.81	0.18518	0.66769	0.070299	0.96437
Atf1	-0.04264	5302	4265	4476	4	0.14053	0.49895	0.64092	0.92138	0.61781	0.99964	0.18317	0.64938	0.69851	0.92634	0.5161	0.96642
Atf2	0.06803	7228	6245	4489	4	0.13998	0.33394	0.64433	0.92307	0.73842	0.99964	0.07195	0.17121	0.8919	0.98102	0.86406	0.99049
Atf3	-0.265725	1919	2740	7117	4	0.014355	0.060964	0.82618	0.96975	0.95139	0.99964	0.28008	1.192	0.38113	0.79714	0.23325	0.96437
Atf4	0.362758	10416	6473	896	4	0.42079	1.4972	0.044437	0.45844	0.13435	0.99964	0.058032	0.20448	0.84678	0.97462	0.83798	0.98621
Atf5	0.242121	9486	9385	5618	4	0.085701	0.33817	0.87105	0.97522	0.73523	0.99964	-0.15642	-0.61378	0.28722	0.74125	0.53936	0.96642
Atf6	-0.47047	518	383	4861	4	0.12172	0.32762	0.71971	0.94381	0.7432	0.99964	0.59219	1.6041	0.013844	0.36161	0.10869	0.96437
Atf6b	0.14419	8351	8672	6320	4	0.052824	0.21964	0.98556	0.99724	0.82615	0.99964	-0.091366	-0.37756	0.40882	0.80828	0.70576	0.97373
Atf7ip	-0.23456	2309	377	1308	4	0.35876	1.1423	0.091437	0.55816	0.25332	0.99964	0.59332	1.894	0.013502	0.35666	0.058229	0.96437
Atg10	-0.382983	913	7957	11417	4	-0.42126	-1.9658	0.051871	0.48367	0.049318	0.99964	-0.038277	-0.17965	0.5429	0.8712	0.85743	0.98883
Atg101	0.49167	11014	11479	10241	4	-0.1937	-0.84927	0.22278	0.70307	0.39573	0.99964	-0.68537	-2.9533	0.026748	0.41119	0.0031445	0.79993
Atg12	-0.57951	250	10447	11686	4	-0.87075	-3.2703	0.016066	0.32929	0.0010745	0.99964	-0.29124	-1.1002	0.13459	0.60848	0.27122	0.96437
Atg13	0.0446	6858	2215	1275	4	0.36235	0.94368	0.08913	0.55695	0.34534	0.99964	0.31775	0.82483	0.28534	0.73839	0.40947	0.96642
Atg14	0.45334	10875	11156	7598	4	-0.01036	-0.027902	0.72723	0.94503	0.97774	0.99964	-0.4637	-1.2298	0.055033	0.48212	0.21875	0.96437
Atg16l1	-0.69456	121	457	9507	4	-0.12862	-0.25112	0.35361	0.79715	0.80172	0.99964	0.56594	1.1324	0.018971	0.39928	0.25748	0.96437
Atg16l2	0.59652	11260	11546	10155	4	-0.18574	-0.68058	0.23808	0.71734	0.49614	0.99964	-0.78226	-2.8245	0.023415	0.41119	0.0047359	0.88889
Atg2a	-0.207177	2651	3967	7526	4	-0.0065774	-0.022728	0.7409	0.94612	0.98187	0.99964	0.2006	0.69578	0.631	0.90368	0.48656	0.96642
Atg2b	0.025069	6527	8199	7928	4	-0.028533	-0.10293	0.66117	0.92636	0.91802	0.99964	-0.053602	-0.19271	0.50325	0.85931	0.84719	0.98707
Atg3	0.06784	7222	2650	1339	4	0.35452	0.95215	0.096223	0.56811	0.34102	0.99964	0.28668	0.76715	0.36344	0.78626	0.44299	0.96642
Atg4b	-0.37329	982	738	4905	4	0.11939	0.33556	0.72945	0.94523	0.7372	0.99964	0.49268	1.3933	0.049222	0.46414	0.16353	0.96437
Atg4c	0.111054	7912	7532	5279	4	0.10128	0.39168	0.80636	0.96399	0.6953	0.99964	-0.0097741	-0.037633	0.62391	0.90187	0.96998	0.99748
Atg4d	0.38926	10558	4380	314	4	0.56575	1.1967	0.006751	0.24471	0.23144	0.99964	0.17649	0.36895	0.72304	0.93349	0.71216	0.97403
Atg5	-0.24341	2201	855	2919	4	0.22737	0.67869	0.33806	0.78612	0.49733	0.99964	0.47078	1.4087	0.063664	0.50067	0.15893	0.96437
Atg7	0.23924	9457	9156	5184	4	0.10591	0.31435	0.78756	0.9605	0.75326	0.99964	-0.13333	-0.39289	0.32806	0.76662	0.6944	0.9733
Atg9a	0.28304	9855	3306	438	4	0.52524	0.65075	0.011024	0.28924	0.5152	0.99964	0.2422	0.2968	0.49692	0.85744	0.76662	0.98045
Atg9b	-0.10584	4214	2093	2989	4	0.22255	1.0183	0.35302	0.79703	0.30855	0.99964	0.32839	1.5015	0.26218	0.72248	0.13323	0.96437
Atic	0.0652094	7174	7485	6195	4	0.058796	0.13231	0.98863	0.99759	0.89474	0.99964	-0.0064134	-0.014411	0.63288	0.90375	0.9885	0.99847
Atl1	-0.075681	4706	5789	6963	4	0.021499	0.09976	0.85293	0.9711	0.92053	0.99964	0.09718	0.45069	0.98368	0.99758	0.65221	0.97206
Atl2	-0.48264	476	2942	10431	4	-0.21609	-0.49324	0.19176	0.67447	0.62184	0.99964	0.26655	0.61397	0.42036	0.81369	0.53923	0.96642
Atl3	0.237887	9439	7938	3398	4	0.20069	0.58727	0.42078	0.82968	0.55702	0.99964	-0.037197	-0.10804	0.54529	0.8716	0.91396	0.99413
Atm	0.253283	9605	10585	8519	4	-0.062267	-0.20674	0.54204	0.88545	0.83622	0.99964	-0.31555	-1.0381	0.11776	0.58266	0.29923	0.96437
Atmin	0.352681	10348	10252	5372	4	0.096581	0.35181	0.8255	0.96975	0.72498	0.99964	-0.2561	-0.9226	0.16348	0.64869	0.35622	0.96437
Atn1	-0.45863	566	3184	10368	4	-0.20765	-0.72898	0.20407	0.68807	0.46601	0.99964	0.25098	0.88457	0.46778	0.83918	0.37639	0.96437
Atox1	-0.236242	2294	5922	9735	4	-0.14702	-0.6604	0.31448	0.77136	0.509	0.99964	0.089222	0.40117	0.95548	0.99281	0.6883	0.9733
Atp10a	-0.44445	614	2592	9808	4	-0.15364	-0.55161	0.30003	0.76443	0.58121	0.99964	0.29081	1.0537	0.35319	0.78088	0.29203	0.96437
Atp11a	0.01632	6374	10185	10544	4	-0.23062	-1.1342	0.17356	0.65728	0.25671	0.99964	-0.24694	-1.2123	0.17313	0.65886	0.22538	0.96437
Atp11b	0.179512	8807	7853	4343	4	0.14806	0.63849	0.61289	0.91219	0.52315	0.99964	-0.031452	-0.13501	0.55948	0.87527	0.8926	0.99313
Atp11c	-0.11734	4020	2878	4243	4	0.15357	0.88022	0.59135	0.90422	0.37874	0.99964	0.27091	1.5523	0.40788	0.80828	0.12058	0.96437
Atp13a1	-0.312132	1435	7974	11197	4	-0.35134	-2.0682	0.07785	0.53651	0.038619	0.99964	-0.039208	-0.23158	0.54145	0.87119	0.81686	0.98591
Atp13a2	0.313682	10092	8314	2561	4	0.25111	1.0191	0.27611	0.74584	0.30815	0.99964	-0.062572	-0.25215	0.47881	0.84408	0.80092	0.98555
Atp13a3	0.09893	7725	6560	4287	4	0.15107	0.64913	0.60109	0.90802	0.51625	0.99964	0.05214	0.22352	0.82576	0.9671	0.82313	0.98591
Atp13a4	0.18384	8866	1401	297	4	0.57654	1.7302	0.0059819	0.22581	0.08359	0.99964	0.3927	1.1728	0.14869	0.63378	0.24089	0.96437
Atp1a1	-0.00348	6023	826	659	4	0.47159	1.1481	0.022731	0.37119	0.25094	0.99964	0.47507	1.1522	0.060332	0.49275	0.24924	0.96437
Atp1b1	0.259232	9654	9628	5777	4	0.078562	0.33336	0.90207	0.97958	0.73886	0.99964	-0.18067	-0.76194	0.25141	0.7154	0.4461	0.96642
Atp1b3	0.328574	10196	10894	8454	4	-0.057666	-0.082412	0.55614	0.89086	0.93432	0.99964	-0.38624	-0.54443	0.081695	0.52896	0.58614	0.96993
Atp23	-0.10039	4292	1493	2127	4	0.28316	0.96736	0.2033	0.68757	0.33336	0.99964	0.38355	1.3093	0.16288	0.64854	0.19043	0.96437
Atp2a2	-0.19295	2865	235	709	4	0.46052	0.48991	0.026748	0.38575	0.6242	0.99964	0.65347	0.69633	0.0058964	0.25246	0.48622	0.96642
Atp2a3	-0.002969	6032	8363	8629	4	-0.069113	-0.281	0.52008	0.8759	0.77871	0.99964	-0.066144	-0.2683	0.46795	0.83923	0.78847	0.98484
Atp2b1	-0.02155	5701	2934	2634	4	0.24559	0.65412	0.29072	0.76039	0.51303	0.99964	0.26714	0.70945	0.41873	0.81267	0.47804	0.96642
Atp2c1	-0.129117	3861	8121	10071	4	-0.17812	-0.68543	0.25064	0.72473	0.49307	0.99964	-0.049003	-0.18845	0.51641	0.86447	0.85053	0.98798
Atp5a1	-0.05296	5112	80	88	4	0.78246	1.3151	0.00025637	0.032967	0.18848	0.99964	0.83542	1.4046	0.00034182	0.043478	0.16013	0.96437
Atp5b	-0.05234	5128	1288	1329	4	0.35627	0.78933	0.094685	0.56396	0.42992	0.99964	0.40861	0.90522	0.12579	0.59596	0.36535	0.96437
Atp5c1	-0.61616	197	1795	10755	4	-0.26319	-0.62448	0.13775	0.60899	0.53231	0.99964	0.35297	0.84845	0.21278	0.68899	0.39619	0.96437
Atp5d	0.14761	8391	1881	564	4	0.49354	0.87796	0.016407	0.33046	0.37996	0.99964	0.34593	0.61129	0.22663	0.70011	0.54101	0.96642
Atp5e	-0.09096	4458	10493	11330	4	-0.38922	-1.1583	0.061699	0.50103	0.24676	0.99964	-0.29826	-0.89277	0.12912	0.60056	0.37198	0.96437
Atp5g1	0.0497747	6937	7363	6359	4	0.050922	0.13901	0.97641	0.99547	0.88944	0.99964	0.0011473	0.0031271	0.65493	0.91	0.9975	0.99924
Atp5g2	0.08561	7503	4660	2630	4	0.24575	0.92322	0.29021	0.76007	0.35589	0.99964	0.16014	0.59948	0.78559	0.95611	0.54885	0.96642
Atp5g3	-0.20317	2710	1302	3332	4	0.204	0.45588	0.41019	0.82539	0.64848	0.99964	0.40717	0.91507	0.12818	0.59912	0.36016	0.96437
Atp5h	0.03967	6793	4686	3424	4	0.19862	0.55144	0.42796	0.83441	0.58133	0.99964	0.15895	0.44062	0.79021	0.95794	0.65949	0.97214
Atp5j	-0.50985	403	141	2996	4	0.22228	0.48617	0.35387	0.79715	0.62685	0.99964	0.73213	1.6179	0.0020509	0.14545	0.10567	0.96437
Atp5j2	-0.3305	1284	4202	9699	4	-0.14405	-0.51265	0.32003	0.77513	0.6082	0.99964	0.18645	0.66467	0.68655	0.92281	0.50626	0.96642
Atp5k	-0.110065	4149	4850	6602	4	0.038915	0.093037	0.92292	0.98235	0.92587	0.99964	0.14898	0.35679	0.82653	0.96711	0.72125	0.97435
Atp5l	-0.25201	2102	4977	9282	4	-0.1109	-0.34307	0.39839	0.82164	0.73154	0.99964	0.14111	0.43875	0.85678	0.9764	0.66084	0.97252
Atp5md	0.048194	6904	9114	8830	4	-0.080956	-0.31652	0.48154	0.85651	0.75161	0.99964	-0.12915	-0.5042	0.33584	0.7728	0.61412	0.97075
Atp5mpl	0.0898	7567	1154	464	4	0.51848	1.3969	0.012049	0.29622	0.16243	0.99964	0.42868	1.1529	0.1022	0.56013	0.24896	0.96437
Atp6ap1	-0.386468	904	1971	8304	4	-0.047838	-0.19946	0.58947	0.90385	0.8419	0.99964	0.33863	1.416	0.24124	0.71124	0.15679	0.96437
Atp6ap2	-0.38702	901	2178	8589	4	-0.06639	-0.27885	0.52931	0.88098	0.78036	0.99964	0.32063	1.3547	0.27833	0.73395	0.17552	0.96437
Atp6v0a1	0.21682	9228	2073	364	4	0.54698	1.5338	0.0082037	0.25946	0.12508	0.99964	0.33016	0.91874	0.25816	0.72049	0.35823	0.96437
Atp6v0b	-0.08595	4538	9661	10803	4	-0.26993	-0.57063	0.13237	0.60398	0.56825	0.99964	-0.18398	-0.39002	0.24722	0.71404	0.69652	0.9733
Atp6v0c	0.482581	10977	11146	6933	4	0.023221	0.055673	0.86011	0.9723	0.9556	0.99964	-0.45936	-1.0814	0.055973	0.48339	0.27951	0.96437
Atp6v0d1	-0.371375	997	2305	8496	4	-0.060215	-0.1736	0.5482	0.88937	0.86218	0.99964	0.31116	0.90506	0.3008	0.74968	0.36543	0.96437
Atp6v0d2	0.188833	8923	7066	3246	4	0.20812	1.0016	0.39814	0.82164	0.31652	0.99964	0.019287	0.092445	0.71253	0.92938	0.92634	0.99432
Atp6v0e	-0.17638	3115	1621	3528	4	0.19296	0.36503	0.44736	0.84214	0.71509	0.99964	0.36934	0.70083	0.18458	0.66769	0.48341	0.96642
Atp6v0e2	0.177859	8778	10148	8559	4	-0.064911	-0.30139	0.53393	0.88127	0.76311	0.99964	-0.24277	-1.1212	0.17715	0.65936	0.26222	0.96437
Atp6v1a	0.12708	8143	308	108	4	0.75005	1.0905	0.00059819	0.060345	0.27548	0.99964	0.62297	0.90042	0.0081183	0.27378	0.3679	0.96437
Atp6v1b2	1.13727	11664	11536	1177	4	0.37677	0.56134	0.076397	0.53214	0.57456	0.99964	-0.7605	-1.0988	0.024269	0.41119	0.27187	0.96437
Atp6v1c1	-0.38655	903	361	3115	4	0.21536	0.47799	0.37618	0.80889	0.63266	0.99964	0.60191	1.3416	0.011793	0.33173	0.17972	0.96437
Atp6v1d	0.167557	8644	8109	4909	4	0.11924	0.25373	0.7303	0.94523	0.7997	0.99964	-0.048317	-0.10202	0.51795	0.86454	0.91874	0.99432
Atp6v1e1	0.9614	11617	11533	3346	4	0.20334	0.67599	0.41241	0.82598	0.49905	0.99964	-0.75806	-2.4393	0.024697	0.41119	0.014717	0.96437
Atp6v1f	-0.0457941	5245	6771	7532	4	-0.0069381	-0.013031	0.7397	0.94601	0.9896	0.99964	0.038856	0.072931	0.77987	0.95321	0.94186	0.99565
Atp6v1g1	0.045684	6878	6879	5798	4	0.077335	0.22346	0.90668	0.97992	0.82318	0.99964	0.031651	0.091213	0.75517	0.94422	0.92732	0.99432
Atp6v1g2	0.065825	7188	8657	7864	4	-0.024692	-0.093054	0.67612	0.931	0.92586	0.99964	-0.090517	-0.34028	0.41027	0.80845	0.73365	0.97601
Atp6v1h	0.014458	6351	7846	7717	4	-0.016406	-0.058064	0.70655	0.94123	0.9537	0.99964	-0.030864	-0.10878	0.56119	0.87617	0.91337	0.99413
Atp7a	-0.11793	4012	679	1104	4	0.38782	1.3972	0.067168	0.51172	0.16236	0.99964	0.50575	1.8233	0.042044	0.4385	0.068264	0.96437
Atp7b	-0.06	4978	3495	3923	4	0.17041	0.86355	0.53085	0.88101	0.38783	0.99964	0.23041	1.1676	0.53452	0.86988	0.24295	0.96437
Atp8a1	0.073509	7317	8628	7676	4	-0.014488	-0.034826	0.71278	0.94195	0.97222	0.99964	-0.087997	-0.2108	0.41574	0.81201	0.83304	0.98591
Atp8a2	0.0528749	6983	8261	7494	4	-0.0052071	-0.028277	0.74611	0.94646	0.97744	0.99964	-0.058082	-0.31459	0.49	0.85175	0.75307	0.9789
Atp8b2	-0.04745	5216	2026	2086	4	0.2865	0.75293	0.19621	0.67869	0.45149	0.99964	0.33395	0.87703	0.24987	0.71449	0.38047	0.96437
Atp8b4	-0.28709	1676	5582	10092	4	-0.17954	-0.77023	0.24859	0.72356	0.44116	0.99964	0.10755	0.46223	0.97676	0.99704	0.64391	0.97182
Atp8b5	-0.41069	768	4889	10764	4	-0.26452	-1.1933	0.13656	0.60737	0.23276	0.99964	0.14617	0.66437	0.83789	0.97282	0.50645	0.96642
Atp9a	0.34709	10310	11513	11307	4	-0.38421	-1.4387	0.063408	0.50268	0.15023	0.99964	-0.7313	-2.7117	0.025551	0.41119	0.0066939	0.96183
Atp9b	-0.34681	1165	880	4899	4	0.1198	0.39349	0.72808	0.94523	0.69396	0.99964	0.46661	1.5446	0.067083	0.50907	0.12244	0.96437
Atpaf1	0.02222	6465	1007	663	4	0.47078	1.2332	0.022902	0.37119	0.2175	0.99964	0.44856	1.1724	0.08349	0.53322	0.24102	0.96437
Atpaf2	-0.748391	82	108	6903	4	0.024229	0.072726	0.86404	0.97305	0.94202	0.99964	0.77262	2.338	0.00094001	0.092437	0.01939	0.96437
Atpsckmt	0.24624	9532	11320	11025	4	-0.30952	-0.99556	0.10092	0.57006	0.31946	0.99964	-0.55576	-1.7728	0.036917	0.41762	0.076257	0.96437
Atr	0.020698	6438	8818	8832	4	-0.081122	-0.24563	0.48069	0.85616	0.80597	0.99964	-0.10182	-0.30765	0.38711	0.8017	0.75835	0.97906
Atraid	0.06756	7218	9913	9713	4	-0.14542	-0.68909	0.31721	0.77173	0.49076	0.99964	-0.21298	-1.0057	0.20697	0.68252	0.31457	0.96437
Atrip	0.827903	11557	11541	6159	4	0.060413	0.15427	0.98137	0.99679	0.8774	0.99964	-0.76749	-1.8999	0.023842	0.41119	0.057442	0.96437
Atrn	-0.443706	618	899	6981	4	0.020764	0.07394	0.84994	0.97082	0.94106	0.99964	0.46447	1.662	0.068792	0.51009	0.096503	0.96437
Atrnl1	0.088726	7544	6869	4880	4	0.12103	0.57698	0.72312	0.94381	0.56395	0.99964	0.032304	0.15343	0.75765	0.94531	0.87806	0.99169
Atrx	-0.175023	3140	6133	9098	4	-0.097075	-0.34177	0.43471	0.83582	0.73252	0.99964	0.077948	0.27438	0.91172	0.98386	0.78379	0.98369
Atxn1	0.194554	8990	7841	4033	4	0.16385	0.53719	0.55367	0.89086	0.59113	0.99964	-0.030704	-0.10005	0.56221	0.87617	0.9203	0.99432
Atxn10	0.25306	9602	10543	8410	4	-0.05441	-0.19992	0.56862	0.89718	0.84155	0.99964	-0.30747	-1.1191	0.12297	0.59218	0.2631	0.96437
Atxn1l	-0.072913	4748	8399	9687	4	-0.14285	-0.44886	0.32268	0.77762	0.65353	0.99964	-0.069937	-0.21977	0.45881	0.83357	0.82605	0.98591
Atxn2	-0.039111	5382	6612	7177	4	0.010192	0.050136	0.80926	0.96406	0.96001	0.99964	0.049303	0.24242	0.81619	0.96494	0.80846	0.98555
Atxn2l	-0.23181	2344	520	1777	4	0.31424	0.84532	0.14792	0.61844	0.39793	0.99964	0.54605	1.4733	0.025124	0.41119	0.14068	0.96437
Atxn3	0.30717	10044	9307	4136	4	0.15896	0.5638	0.57059	0.89805	0.57289	0.99964	-0.14821	-0.52115	0.30174	0.75	0.60226	0.97075
Atxn7	0.226749	9335	8330	4054	4	0.16303	0.87926	0.55683	0.89086	0.37926	0.99964	-0.063719	-0.34184	0.47539	0.84316	0.73247	0.97535
Atxn7l1	0.32302	10158	9358	3925	4	0.17023	0.91664	0.53136	0.88127	0.35933	0.99964	-0.15279	-0.81737	0.29457	0.74708	0.41372	0.96642
Atxn7l2	0.07853	7400	2216	1054	4	0.39602	1.0829	0.061186	0.50103	0.27887	0.99964	0.31749	0.86448	0.2861	0.73924	0.38733	0.96437
Atxn7l3	-0.165861	3281	6894	9591	4	-0.13509	-0.27567	0.33849	0.78612	0.7828	0.99964	0.030771	0.06289	0.75184	0.9438	0.94985	0.9959
Atxn7l3b	0.41513	10698	11381	10171	4	-0.18723	-0.72255	0.23483	0.71336	0.46996	0.99964	-0.60236	-2.3041	0.032046	0.41685	0.021217	0.96437
AU022252	-0.00716	5963	1182	918	4	0.41776	0.85722	0.045804	0.45969	0.39133	0.99964	0.42492	0.87253	0.10596	0.56389	0.38292	0.96437
AU040320	-0.197607	2796	5018	8479	4	-0.058967	-0.22739	0.55144	0.89084	0.82012	0.99964	0.13864	0.53506	0.86472	0.97863	0.59261	0.97051
Auh	0.00637	6199	3462	2742	4	0.23924	0.8831	0.30619	0.76658	0.37718	0.99964	0.23287	0.85831	0.52649	0.86678	0.39072	0.96437
Aunip	0.279083	9825	10363	7267	4	0.0058728	0.024064	0.79166	0.9609	0.9808	0.99964	-0.27321	-1.1112	0.14801	0.63212	0.26649	0.96437
Aup1	0.371653	10466	10421	5602	4	0.086233	0.26137	0.86789	0.9742	0.7938	0.99964	-0.28542	-0.85434	0.13878	0.6167	0.39292	0.96437
Aurka	0.41317	10684	9414	2517	4	0.25362	0.59743	0.26953	0.74254	0.55022	0.99964	-0.15955	-0.3705	0.28226	0.73633	0.71101	0.97403
Aurkaip1	0.0668	7207	9822	9580	4	-0.13445	-0.54093	0.33943	0.78612	0.58856	0.99964	-0.20125	-0.80603	0.22355	0.69853	0.42023	0.96642
Aurkb	0.212842	9186	8040	3946	4	0.16912	0.34552	0.53461	0.88138	0.7297	0.99964	-0.043722	-0.088644	0.52923	0.86749	0.92936	0.99507
Aven	-0.05389	5095	3908	4306	4	0.14982	0.67221	0.60537	0.90972	0.50145	0.99964	0.20371	0.91367	0.62194	0.90158	0.36089	0.96437
Avil	-0.01829	5750	8951	9562	4	-0.13293	-0.5578	0.3431	0.78865	0.57698	0.99964	-0.11464	-0.48018	0.3625	0.7862	0.6311	0.97075
Avl9	0.218859	9248	9378	6073	4	0.063969	0.26422	0.96488	0.99428	0.79161	0.99964	-0.15489	-0.6357	0.2908	0.74415	0.52497	0.96642
Avpi1	-0.1679	3242	1445	3047	4	0.2197	0.96214	0.36242	0.80045	0.33598	0.99964	0.3876	1.6992	0.15749	0.64601	0.089279	0.96437
AW146154	-0.2667	1912	4178	8794	4	-0.07843	-0.33383	0.48975	0.86167	0.73851	0.99964	0.18827	0.80441	0.67817	0.91873	0.42116	0.96642
AW209491	0.0737	7322	10038	9820	4	-0.15402	-0.64484	0.29875	0.76443	0.51903	0.99964	-0.22772	-0.95244	0.1927	0.67414	0.34087	0.96437
AW549877	0.12737	8148	10631	10271	4	-0.19704	-0.71615	0.21894	0.70043	0.4739	0.99964	-0.32441	-1.1737	0.11203	0.57243	0.2405	0.96437
Awat2	0.12044	8050	4597	2108	4	0.28466	0.98451	0.20014	0.6846	0.32486	0.99964	0.16422	0.56608	0.77106	0.95039	0.57134	0.96642
Axin1	0.167988	8649	9170	6725	4	0.032958	0.083443	0.89856	0.97924	0.9335	0.99964	-0.13503	-0.33979	0.3249	0.76513	0.73402	0.97601
Axl	0.01499	6358	5998	5301	4	0.10017	0.362	0.81012	0.9641	0.71735	0.99964	0.08518	0.30724	0.9377	0.98874	0.75866	0.97906
Azgp1	-0.01416	5825	2072	1760	4	0.3161	1.2732	0.14519	0.61469	0.20295	0.99964	0.33026	1.3286	0.25773	0.71964	0.18397	0.96437
Azi2	0.11925	8031	4096	1796	4	0.31277	1.2606	0.15083	0.62345	0.20746	0.99964	0.19352	0.77735	0.65801	0.91135	0.43695	0.96642
Azin1	0.22686	9337	8975	5108	4	0.11035	0.47372	0.76961	0.95495	0.6357	0.99964	-0.11651	-0.49799	0.35883	0.78489	0.61849	0.97075
Azin2	-0.060761	4966	5184	5976	4	0.069319	0.28465	0.94104	0.9864	0.77591	0.99964	0.13008	0.53336	0.89446	0.98102	0.59378	0.97075
B230217C12Rik	-0.058441	4999	5165	5911	4	0.072439	0.31853	0.92745	0.98387	0.75009	0.99964	0.13088	0.57522	0.89156	0.98102	0.56514	0.96642
B230219D22Rik	-0.02325	5675	10823	11329	4	-0.38905	-1.2438	0.061699	0.50103	0.21357	0.99964	-0.3658	-1.1735	0.090156	0.54433	0.24058	0.96437
B2m	-0.30336	1516	4473	9548	4	-0.13168	-0.60059	0.34644	0.79195	0.54812	0.99964	0.17168	0.78519	0.7409	0.93833	0.43234	0.96642
B3galnt1	0.128292	8163	6550	3729	4	0.18111	0.66019	0.48821	0.86156	0.50913	0.99964	0.052818	0.1916	0.82806	0.96803	0.84806	0.98717
B3galnt2	-0.28096	1744	5319	9869	4	-0.15853	-0.80808	0.28952	0.75987	0.41904	0.99964	0.12243	0.62643	0.92147	0.98583	0.53103	0.96642
B3galt4	-0.20483	2683	1565	3920	4	0.17048	0.61812	0.53059	0.88098	0.5365	0.99964	0.37531	1.3611	0.17416	0.65936	0.17348	0.96437
B3galt6	0.200032	9036	8041	4190	4	0.15626	0.60179	0.58178	0.90161	0.54731	0.99964	-0.043772	-0.16784	0.52914	0.86749	0.86671	0.99077
B3gat2	-0.6272	185	4835	11508	4	-0.47736	-2.2949	0.03837	0.43215	0.021741	0.99964	0.14984	0.72609	0.82319	0.96604	0.46779	0.96642
B3gat3	0.24308	9497	5542	1356	4	0.35276	1.6772	0.098359	0.57006	0.0935	0.99964	0.10968	0.51917	0.96975	0.99588	0.60364	0.97075
B3glct	0.48576	10990	9916	2273	4	0.27184	0.78278	0.22817	0.70716	0.43376	0.99964	-0.21392	-0.60854	0.20603	0.68184	0.54283	0.96642
B3gnt2	0.45096	10867	10524	4356	4	0.14712	0.36503	0.61622	0.91441	0.71509	0.99964	-0.30384	-0.74549	0.12485	0.59431	0.45597	0.96642
B3gnt3	-0.134976	3753	4397	6567	4	0.040804	0.14212	0.93292	0.9856	0.88698	0.99964	0.17578	0.61202	0.72535	0.93368	0.54053	0.96642
B3gnt7	-0.03175	5531	4191	4199	4	0.15578	0.64746	0.58264	0.90161	0.51734	0.99964	0.18753	0.77782	0.68134	0.91972	0.43668	0.96642
B3gnt8	-0.46812	529	250	3749	4	0.18037	0.4603	0.49111	0.86216	0.6453	0.99964	0.64849	1.6677	0.0064946	0.25246	0.095382	0.96437
B3gnt9	0.063139	7144	7689	6528	4	0.04256	0.20133	0.93924	0.9864	0.84044	0.99964	-0.020579	-0.097125	0.59272	0.89003	0.92263	0.99432
B3gntl1	0.15615	8502	11016	10744	4	-0.26076	-1.1559	0.13981	0.61342	0.24773	0.99964	-0.41691	-1.8404	0.069475	0.511	0.065708	0.96437
B430306N03Rik	-0.05407	5091	758	836	4	0.43467	1.4844	0.037259	0.42412	0.1377	0.99964	0.48874	1.6681	0.051871	0.47348	0.095288	0.96437
B4galnt1	-0.40461	801	111	1279	4	0.36169	0.84559	0.089386	0.55695	0.39778	0.99964	0.7663	1.7993	0.0011109	0.10078	0.071969	0.96437
B4galt1	0.95208	11615	10644	223	4	0.62506	2.1794	0.0029055	0.14655	0.029304	0.99964	-0.32702	-1.1146	0.11049	0.56923	0.26503	0.96437
B4galt3	0.345865	10300	6969	1210	4	0.37079	0.83657	0.081866	0.54747	0.40284	0.99964	0.024925	0.055746	0.73338	0.93567	0.95554	0.99626
B4galt4	0.022324	6470	5906	5073	4	0.11226	0.37808	0.7609	0.9524	0.70537	0.99964	0.089936	0.30221	0.95821	0.99309	0.76249	0.97921
B4galt5	-0.07198	4766	11465	11668	4	-0.74064	-1.9818	0.020509	0.3631	0.047503	0.99964	-0.66866	-1.797	0.027431	0.41119	0.072335	0.96437
B4galt6	-0.16847	3235	2579	4821	4	0.12359	0.4553	0.71167	0.94166	0.6489	0.99964	0.29206	1.0756	0.35054	0.77955	0.28212	0.96437
B4galt7	-0.0415	5335	3978	4152	4	0.15822	0.61174	0.57341	0.89946	0.54071	0.99964	0.19972	0.77146	0.63468	0.90496	0.44043	0.96642
B4gat1	0.096998	7688	9526	8705	4	-0.073252	-0.22008	0.50581	0.86878	0.82581	0.99964	-0.17025	-0.51018	0.26517	0.72466	0.60993	0.97075
B9d1	0.018435	6410	8351	8279	4	-0.046546	-0.17024	0.59451	0.90562	0.86482	0.99964	-0.064981	-0.23727	0.47129	0.84159	0.81245	0.98591
B9d2	0.00689	6210	8934	9219	4	-0.10594	-0.37485	0.41104	0.82539	0.70777	0.99964	-0.11283	-0.3987	0.36626	0.78888	0.69012	0.9733
Baat	0.115222	7976	9548	8441	4	-0.056898	-0.19238	0.55905	0.89237	0.84744	0.99964	-0.17212	-0.58034	0.2626	0.72248	0.56168	0.96642
Babam1	0.37037	10459	9320	3021	4	0.22125	0.95837	0.35712	0.79756	0.33787	0.99964	-0.14912	-0.64095	0.30003	0.74925	0.52155	0.96642
Babam2	0.19339	8974	2686	633	4	0.47728	1.7017	0.020851	0.3631	0.088817	0.99964	0.28389	1.0079	0.37028	0.79214	0.31349	0.96437
Bace1	0.136311	8253	8446	6102	4	0.062719	0.30549	0.97137	0.99527	0.75999	0.99964	-0.073592	-0.35702	0.44984	0.83015	0.72108	0.97435
Bace2	0.043	6839	11082	11351	4	-0.39433	-1.5944	0.059562	0.50072	0.11085	0.99964	-0.43733	-1.7668	0.061955	0.49488	0.077262	0.96437
Bach1	0.010072	6268	6683	6282	4	0.0546	0.12353	0.99274	0.9988	0.90168	0.99964	0.044528	0.10041	0.80132	0.96115	0.92002	0.99432
Bach2	0.0897	7564	989	379	4	0.54125	1.4901	0.0089728	0.2732	0.1362	0.99964	0.45155	1.2397	0.080157	0.5252	0.21509	0.96437
Bad	-0.11009	4147	2774	3976	4	0.16731	0.46631	0.5417	0.88545	0.641	0.99964	0.2774	0.77467	0.38908	0.80204	0.43854	0.96642
Bag1	-0.179767	3062	3459	6311	4	0.053243	0.20688	0.98744	0.9975	0.83611	0.99964	0.23301	0.90636	0.52615	0.86678	0.36475	0.96437
Bag2	-0.19756	2798	4766	8222	4	-0.04382	-0.19959	0.60537	0.90972	0.8418	0.99964	0.15374	0.70068	0.80849	0.96315	0.4835	0.96642
Bag3	-0.116379	4034	5404	7380	4	0.00083083	0.0033851	0.7697	0.95495	0.9973	0.99964	0.11721	0.47709	0.9418	0.98923	0.6333	0.97075
Bag4	0.341286	10270	7440	1514	4	0.33792	1.3893	0.11425	0.58239	0.16473	0.99964	-0.0033658	-0.013715	0.64237	0.90654	0.98906	0.99847
Bag5	0.00883	6250	5577	4977	4	0.11674	0.49041	0.7397	0.94601	0.62384	0.99964	0.10791	0.45209	0.97547	0.9966	0.6512	0.97206
Bag6	-0.595789	227	368	7392	4	2.09e-05	7.4504e-05	0.76722	0.9544	0.99994	1	0.59581	2.1349	0.012989	0.35666	0.032766	0.96437
Bahd1	0.0938242	7642	8746	7446	4	-0.0027258	-0.012883	0.75714	0.95105	0.98972	0.99964	-0.09655	-0.45479	0.39908	0.80772	0.64926	0.97206
Baiap2	-0.311551	1442	1539	6028	4	0.066409	0.28686	0.95496	0.99131	0.77422	0.99964	0.37796	1.6357	0.17031	0.65581	0.1019	0.96437
Baiap2l1	-0.304	1510	5005	9924	4	-0.16462	-0.71846	0.27782	0.74787	0.47248	0.99964	0.13938	0.60963	0.8619	0.97723	0.54211	0.96642
Bak1	-0.1787	3078	670	1605	4	0.32931	1.1663	0.12605	0.59935	0.24351	0.99964	0.50801	1.7997	0.039908	0.42909	0.071904	0.96437
Bambi	0.151626	8446	7420	4318	4	0.14937	0.63402	0.60716	0.91008	0.52607	0.99964	-0.0022556	-0.0095268	0.64562	0.90658	0.9924	0.99868
Banf1	-0.47727	496	4106	10888	4	-0.28456	-0.67873	0.11895	0.59033	0.49731	0.99964	0.19271	0.46346	0.66211	0.91394	0.64303	0.97182
Bank1	0.084042	7483	6855	4968	4	0.11711	0.41475	0.73825	0.94553	0.67832	0.99964	0.033068	0.11674	0.76038	0.94579	0.90706	0.99413
Bap1	0.329148	10203	10289	5997	4	0.067888	0.12699	0.94787	0.98921	0.89895	0.99964	-0.26126	-0.48177	0.15861	0.64601	0.62997	0.97075
Bard1	0.00027	6095	5082	4582	4	0.13544	0.51998	0.66288	0.92667	0.60308	0.99964	0.13517	0.51749	0.87831	0.98021	0.60482	0.97075
Basp1	-0.074203	4724	7831	9195	4	-0.10443	-0.38585	0.41463	0.82689	0.69961	0.99964	-0.030227	-0.11173	0.56375	0.87691	0.91104	0.99413
Batf2	-0.02554	5632	5240	5280	4	0.10127	0.30404	0.80636	0.96399	0.7611	0.99964	0.12681	0.38008	0.90617	0.98313	0.70388	0.97373
Batf3	-0.16859	3234	1710	3535	4	0.19253	0.92041	0.4489	0.8425	0.35736	0.99964	0.36112	1.727	0.1986	0.67553	0.084171	0.96437
Bax	0.06505	7172	895	417	4	0.52991	2.2478	0.010169	0.27869	0.02459	0.99964	0.46486	1.9678	0.068621	0.51009	0.04909	0.96437
Baz1a	0.150534	8432	8128	5282	4	0.10114	0.27773	0.80687	0.96399	0.78122	0.99964	-0.049394	-0.13485	0.51572	0.86447	0.89273	0.99313
Baz1b	0.358723	10387	8026	1758	4	0.31614	0.71689	0.14519	0.61469	0.47344	0.99964	-0.042583	-0.095212	0.53213	0.86909	0.92415	0.99432
Baz2a	-0.05272	5123	4520	4997	4	0.11607	0.49964	0.74295	0.94644	0.61733	0.99964	0.16879	0.72705	0.75338	0.9438	0.46719	0.96642
Baz2b	0.168725	8660	8885	6156	4	0.060445	0.2352	0.9812	0.99679	0.81405	0.99964	-0.10828	-0.41864	0.37498	0.79406	0.67548	0.9733
Bbc3	-0.28108	1743	1144	4330	4	0.14855	0.45506	0.61135	0.91219	0.64906	0.99964	0.42963	1.3228	0.10118	0.56002	0.18591	0.96437
Bbip1	-0.09495	4385	1685	2331	4	0.26828	0.97935	0.23646	0.71499	0.32741	0.99964	0.36323	1.3263	0.19518	0.67414	0.18475	0.96437
Bbof1	-0.167475	3251	4313	7129	4	0.013335	0.040948	0.82157	0.96798	0.96734	0.99964	0.18081	0.55684	0.70697	0.92747	0.57764	0.96759
Bbox1	-0.06268	4926	9564	10582	4	-0.23586	-0.92091	0.16689	0.65029	0.3571	0.99964	-0.17318	-0.6787	0.26175	0.72248	0.49733	0.96642
Bbs1	0.174356	8737	8327	5094	4	0.11085	0.44183	0.76713	0.95439	0.65861	0.99964	-0.063506	-0.25176	0.47616	0.84343	0.80122	0.98555
Bbs10	0.0708973	7270	8317	7223	4	0.0081993	0.037384	0.80072	0.96271	0.97018	0.99964	-0.062698	-0.28484	0.47838	0.84371	0.77577	0.98203
Bbs12	0.07099	7272	3977	2290	4	0.27073	1.1641	0.23056	0.71	0.24438	0.99964	0.19974	0.85629	0.63468	0.90496	0.39184	0.96437
Bbs2	-0.7176	100	528	10033	4	-0.17504	-0.47017	0.25628	0.72951	0.63824	0.99964	0.54256	1.4791	0.02632	0.41119	0.1391	0.96437
Bbs4	0.218925	9250	6156	1978	4	0.2956	1.4113	0.1804	0.66405	0.15814	0.99964	0.076675	0.36443	0.90745	0.98343	0.71553	0.97403
Bbs5	-0.28672	1683	661	2994	4	0.22233	0.50561	0.35361	0.79715	0.61313	0.99964	0.50905	1.1596	0.039566	0.4287	0.24621	0.96437
Bbs7	0.037967	6764	7139	6309	4	0.053255	0.22873	0.98752	0.9975	0.81908	0.99964	0.015288	0.065508	0.70014	0.92711	0.94777	0.9959
Bbs9	-0.21052	2606	9654	11348	4	-0.39381	-1.6888	0.059733	0.50072	0.091257	0.99964	-0.18329	-0.78612	0.24808	0.71411	0.4318	0.96642
Bbx	-0.187934	2948	8542	10798	4	-0.26927	-1.4223	0.13314	0.60398	0.15494	0.99964	-0.081336	-0.42974	0.43155	0.81827	0.66739	0.9733
BC003965	0.18485	8880	10991	10507	4	-0.22615	-0.82677	0.17886	0.66015	0.40836	0.99964	-0.411	-1.494	0.072039	0.51619	0.13518	0.96437
BC004004	-0.36456	1057	3331	9452	4	-0.12396	-0.55563	0.36259	0.80045	0.57846	0.99964	0.2406	1.0867	0.5012	0.85886	0.27719	0.96437
BC005537	0.10924	7891	6112	3605	4	0.18874	0.60334	0.46155	0.84782	0.54628	0.99964	0.0795	0.25304	0.9166	0.98503	0.80023	0.98555
BC005624	0.01265	6313	3890	3085	4	0.21742	0.66698	0.36934	0.80483	0.50479	0.99964	0.20477	0.62601	0.61836	0.89989	0.53131	0.96642
BC024978	0.02983	6609	9460	9570	4	-0.13379	-0.50982	0.34097	0.78714	0.61017	0.99964	-0.16362	-0.62267	0.27611	0.73324	0.5335	0.96642
BC028528	0.02694	6567	3813	2781	4	0.23698	1.0849	0.31131	0.76954	0.27799	0.99964	0.21004	0.96083	0.60067	0.89359	0.33664	0.96437
BC031181	-0.33254	1272	309	2034	4	0.29017	0.91744	0.18851	0.67082	0.35891	0.99964	0.62271	1.9787	0.0082037	0.27507	0.04785	0.96437
BC048403	0.114139	7959	7942	5817	4	0.076683	0.31543	0.90899	0.97992	0.75243	0.99964	-0.037456	-0.15344	0.54478	0.8716	0.87805	0.99169
BC049715	-0.162365	3333	3058	5369	4	0.096655	0.45147	0.82516	0.96975	0.65165	0.99964	0.25902	1.2102	0.44249	0.82531	0.22621	0.96437
BC055324	0.61841	11310	10943	3075	4	0.21823	0.78727	0.36669	0.80191	0.43112	0.99964	-0.40018	-1.4191	0.07597	0.52041	0.15587	0.96437
Bcan	-0.055723	5054	5162	5849	4	0.075327	0.28667	0.91403	0.98003	0.77437	0.99964	0.13105	0.49864	0.89113	0.98102	0.61803	0.97075
Bcap29	0.20402	9088	4763	1315	4	0.3579	1.02	0.092377	0.56039	0.30773	0.99964	0.15388	0.43643	0.80807	0.96313	0.66252	0.97301
Bcap31	-0.25119	2114	6509	10255	4	-0.1954	-0.795	0.22013	0.70043	0.42662	0.99964	0.05579	0.22804	0.83857	0.97311	0.81961	0.98591
Bcar1	0.23578	9423	2130	327	4	0.5612	1.6326	0.0069219	0.24471	0.10256	0.99964	0.32542	0.9444	0.2685	0.72782	0.34496	0.96437
Bcar3	0.356031	10369	10620	6707	4	0.033801	0.13073	0.90181	0.97958	0.89599	0.99964	-0.32223	-1.2335	0.11391	0.57556	0.2174	0.96437
Bcas2	-0.080864	4627	5057	6257	4	0.055636	0.17223	0.9965	0.99889	0.86326	0.99964	0.1365	0.42313	0.87276	0.97957	0.6722	0.9733
Bcas3	-0.507113	415	710	7571	4	-0.0090728	-0.018942	0.73227	0.94523	0.98489	0.99964	0.49804	1.0549	0.046231	0.4547	0.29149	0.96437
Bcat1	0.346529	10302	10305	5673	4	0.083169	0.30491	0.88327	0.97808	0.76043	0.99964	-0.26336	-0.95541	0.15664	0.6452	0.33937	0.96437
Bcat2	0.06152	7117	5152	3527	4	0.19303	0.82521	0.44719	0.84214	0.40925	0.99964	0.13151	0.56079	0.88916	0.98102	0.57494	0.96759
Bccip	0.258391	9643	10491	8146	4	-0.039669	-0.095457	0.6222	0.91581	0.92395	0.99964	-0.29806	-0.70977	0.12921	0.60072	0.47785	0.96642
Bcdin3d	-0.193015	2864	6768	9814	4	-0.15385	-0.54406	0.29944	0.76443	0.5864	0.99964	0.039165	0.13919	0.78132	0.95429	0.8893	0.99264
Bckdha	-0.18954	2925	1617	3751	4	0.1803	0.67704	0.49128	0.86218	0.49838	0.99964	0.36984	1.3892	0.18373	0.66677	0.16478	0.96437
Bckdk	0.07631	7362	5327	3436	4	0.19818	0.77916	0.4295	0.83441	0.43589	0.99964	0.12187	0.47822	0.92318	0.98595	0.6325	0.97075
Bcl10	0.15163	8447	2915	906	4	0.41997	1.2518	0.04512	0.45969	0.21064	0.99964	0.26834	0.79601	0.41557	0.81201	0.42603	0.96642
Bcl11a	0.129193	8173	7502	4865	4	0.12157	0.42047	0.72073	0.94381	0.67414	0.99964	-0.0076228	-0.026277	0.63006	0.90311	0.97904	0.99847
Bcl2	-0.261719	1970	7085	10635	4	-0.24327	-1.3735	0.15775	0.63699	0.16959	0.99964	0.018449	0.1043	0.70962	0.92886	0.91693	0.99432
Bcl2a1a	0.212888	9188	7818	3688	4	0.18336	0.59431	0.47881	0.85529	0.5523	0.99964	-0.029528	-0.095207	0.56597	0.87819	0.92415	0.99432
Bcl2a1b	-0.21249	2580	1532	4000	4	0.166	0.53627	0.54632	0.88742	0.59177	0.99964	0.37849	1.2247	0.16963	0.65545	0.22068	0.96437
Bcl2a1d	-0.19617	2822	553	1506	4	0.33867	0.77463	0.1128	0.58239	0.43856	0.99964	0.53484	1.2244	0.029311	0.41198	0.2208	0.96437
Bcl2l1	0.88231	11588	11692	11604	4	-0.58769	-1.3983	0.02632	0.38356	0.16202	0.99964	-1.47	-3.4004	0.00059819	0.066667	0.00067299	0.5361
Bcl2l11	-0.454519	576	785	6823	4	0.028571	0.11386	0.87968	0.97712	0.90935	0.99964	0.48309	1.9387	0.055033	0.48212	0.052544	0.96437
Bcl2l12	0.329027	10201	10489	6764	4	0.031407	0.1287	0.89181	0.97813	0.8976	0.99964	-0.29762	-1.2074	0.12964	0.60222	0.22728	0.96437
Bcl2l13	-0.022547	5690	5398	5405	4	0.095103	0.29531	0.83208	0.97043	0.76776	0.99964	0.11765	0.36412	0.94018	0.98923	0.71577	0.97403
Bcl2l14	-0.34287	1199	1852	7286	4	0.0051997	0.018809	0.78875	0.96053	0.98499	0.99964	0.34807	1.2615	0.22227	0.6984	0.20712	0.96437
Bcl2l2	0.050099	6942	7781	6924	4	0.023489	0.10918	0.86071	0.9723	0.91306	0.99964	-0.02661	-0.12342	0.574	0.8813	0.90177	0.99413
Bcl3	0.147065	8386	7189	4129	4	0.15943	0.65684	0.56922	0.89723	0.51128	0.99964	0.012365	0.050716	0.68903	0.92402	0.95955	0.99671
Bcl6	0.47158	10944	5424	271	4	0.58792	1.7811	0.0044437	0.18794	0.07489	0.99964	0.11634	0.34917	0.94386	0.98952	0.72696	0.97435
Bcl7a	0.353493	10353	8355	2065	4	0.28799	0.95421	0.19304	0.67581	0.33998	0.99964	-0.065503	-0.2153	0.46958	0.84034	0.82953	0.98591
Bcl7b	0.025171	6532	5886	4995	4	0.11608	0.45178	0.74295	0.94644	0.65143	0.99964	0.090909	0.3526	0.96214	0.99418	0.72439	0.97435
Bcl7c	0.07348	7316	3696	2011	4	0.29208	0.88019	0.18535	0.66841	0.37876	0.99964	0.2186	0.65773	0.57341	0.88092	0.51071	0.96642
Bcl9	0.63533	11338	11621	10956	4	-0.29729	-1.0528	0.11015	0.57744	0.29242	0.99964	-0.93262	-3.2313	0.016664	0.38767	0.0012324	0.60088
Bcl9l	0.22815	9354	2117	343	4	0.5544	1.7029	0.0074346	0.24719	0.088582	0.99964	0.32625	0.99528	0.2673	0.72734	0.3196	0.96437
Bclaf1	-0.43298	664	552	5257	4	0.10229	0.44568	0.80234	0.96347	0.65583	0.99964	0.53527	2.3428	0.029226	0.41198	0.019139	0.96437
Bclaf3	-0.180143	3056	4533	7627	4	-0.011893	-0.073014	0.72184	0.94381	0.9418	0.99964	0.16825	1.0346	0.75466	0.94409	0.30087	0.96437
Bco2	0.335017	10233	7972	1976	4	0.29584	1.1531	0.18014	0.66373	0.24885	0.99964	-0.039177	-0.15179	0.54145	0.87119	0.87935	0.99169
Bcor	-0.185713	2985	8617	10820	4	-0.27299	-1.1328	0.13015	0.60317	0.25728	0.99964	-0.087277	-0.36228	0.41719	0.81245	0.71715	0.97435
Bcorl1	-0.097956	4333	5449	7053	4	0.017204	0.081788	0.83849	0.97043	0.93482	0.99964	0.11516	0.5467	0.94847	0.99027	0.58459	0.96993
Bdh1	-0.077887	4677	8538	9871	4	-0.15888	-0.56499	0.28875	0.75864	0.57208	0.99964	-0.080993	-0.28833	0.43232	0.81887	0.7731	0.98203
Bdh2	0.21752	9237	11527	11569	4	-0.53207	-1.6757	0.030593	0.40544	0.093807	0.99964	-0.74959	-2.3438	0.024868	0.41119	0.019086	0.96437
Bdp1	0.30664	10039	11373	10923	4	-0.29092	-0.78642	0.11442	0.58239	0.43162	0.99964	-0.59756	-1.5967	0.032644	0.41738	0.11034	0.96437
Becn1	0.5482	11156	9821	1419	4	0.34709	0.79379	0.1034	0.57224	0.42732	0.99964	-0.20111	-0.44987	0.22355	0.69853	0.65281	0.97206
Bend3	-0.152593	3511	5833	8464	4	-0.058234	-0.34871	0.55409	0.89086	0.72731	0.99964	0.094359	0.56509	0.97419	0.99624	0.57201	0.96642
Bend4	0.07269	7298	8027	6794	4	0.030079	0.13687	0.88609	0.97813	0.89113	0.99964	-0.042611	-0.19353	0.53213	0.86909	0.84654	0.98699
Bend6	-0.134441	3767	3573	5505	4	0.091289	0.34366	0.84738	0.97075	0.73111	0.99964	0.22573	0.85046	0.5505	0.87349	0.39507	0.96437
Bet1	0.314956	10097	8449	2717	4	0.24093	0.83555	0.302	0.76443	0.40341	0.99964	-0.074026	-0.25429	0.44873	0.82876	0.79927	0.98555
Bet1l	-0.2028	2713	791	2183	4	0.27868	0.95125	0.21296	0.69668	0.34148	0.99964	0.48148	1.6442	0.055375	0.4825	0.10013	0.96437
Bex3	-0.30155	1533	4141	9283	4	-0.11091	-0.6171	0.39839	0.82164	0.53717	0.99964	0.19064	1.0618	0.67014	0.91666	0.28832	0.96437
Bfar	-0.326414	1320	1458	6162	4	0.060286	0.18425	0.98231	0.99706	0.85382	0.99964	0.3867	1.1867	0.15852	0.64601	0.23535	0.96437
Bhlhe40	0.0695517	7252	7272	5813	4	0.076996	0.19228	0.90839	0.97992	0.84752	0.99964	0.0074443	0.018522	0.67313	0.9171	0.98522	0.99847
Bhlhe41	-0.3655	1054	459	3411	4	0.1996	0.46842	0.42429	0.83283	0.63949	0.99964	0.5651	1.338	0.019142	0.40072	0.18089	0.96437
Bhmt	-0.19792	2787	4441	7860	4	-0.02449	-0.11581	0.67664	0.931	0.90781	0.99964	0.17343	0.82365	0.73458	0.93649	0.41014	0.96642
Bhmt2	0.06097	7105	2858	1566	4	0.33263	1.167	0.12135	0.59389	0.24322	0.99964	0.27166	0.95068	0.40566	0.80828	0.34177	0.96437
Bicd2	0.07809	7394	4748	2837	4	0.23308	0.88773	0.32259	0.77762	0.37468	0.99964	0.15499	0.58828	0.80397	0.96196	0.55635	0.96642
Bicdl1	-0.00198	6048	4869	4395	4	0.14524	0.65635	0.62374	0.91581	0.5116	0.99964	0.14722	0.6641	0.83311	0.97063	0.50662	0.96642
Bicra	-0.73156	90	2166	11392	4	-0.40978	-1.5115	0.054948	0.48786	0.13065	0.99964	0.32178	1.196	0.27628	0.73324	0.2317	0.96437
Bicral	0.23402	9409	9117	5214	4	0.10459	0.50423	0.79328	0.96103	0.6141	0.99964	-0.12943	-0.62052	0.33507	0.77231	0.53492	0.96642
Bid	-0.255931	2048	6964	10542	4	-0.23035	-1.2916	0.17407	0.65827	0.19649	0.99964	0.025581	0.14357	0.73534	0.93678	0.88584	0.99186
Bin1	0.010261	6270	6972	6677	4	0.035075	0.16295	0.90822	0.97992	0.87056	0.99964	0.024814	0.11497	0.73278	0.93542	0.90847	0.99413
Bin2	0.19929	9026	3850	996	4	0.40675	1.4437	0.054008	0.48618	0.14881	0.99964	0.20746	0.73236	0.61015	0.89709	0.46395	0.96642
Bin3	-0.315838	1402	7610	11121	4	-0.33086	-1.2524	0.088361	0.55695	0.21042	0.99964	-0.015022	-0.057398	0.60878	0.89709	0.95423	0.99626
Birc2	-0.261086	1979	2141	6085	4	0.063394	0.27324	0.96744	0.99473	0.78467	0.99964	0.32448	1.4005	0.27047	0.72838	0.16136	0.96437
Birc3	-0.267069	1907	3946	8564	4	-0.065189	-0.17015	0.53299	0.88127	0.86489	0.99964	0.20188	0.52892	0.62733	0.9024	0.59686	0.97075
Birc5	0.535986	11117	11370	8490	4	-0.059544	-0.15076	0.54991	0.8907	0.88017	0.99964	-0.59553	-1.4806	0.032986	0.41738	0.13871	0.96437
Birc6	0.0972	7690	3383	1538	4	0.3346	0.86708	0.11853	0.59033	0.3859	0.99964	0.2374	0.61277	0.51231	0.86398	0.54003	0.96642
Bivm	0.04732	6890	229	148	4	0.70372	1.871	0.00094001	0.070968	0.061343	0.99964	0.6564	1.7394	0.0056401	0.25095	0.081966	0.96437
Blcap	-0.00818	5944	5341	5056	4	0.11315	0.50281	0.75688	0.95093	0.61509	0.99964	0.12133	0.53792	0.92506	0.98633	0.59063	0.97026
Blm	0.2029	9071	480	102	4	0.76058	1.4395	0.00059819	0.060345	0.15001	0.99964	0.55768	1.0463	0.021278	0.4108	0.29544	0.96437
Blmh	-0.113712	4090	7008	8983	4	-0.090845	-0.51867	0.45189	0.84284	0.60399	0.99964	0.022867	0.13053	0.72552	0.93369	0.89615	0.99359
Blnk	-0.00763	5954	780	639	4	0.47663	1.0384	0.021108	0.36324	0.29911	0.99964	0.48426	1.0537	0.054264	0.48143	0.29202	0.96437
Bloc1s1	0.68967	11417	11272	4094	4	0.16089	0.35304	0.56495	0.89628	0.72406	0.99964	-0.52878	-1.1311	0.040848	0.43297	0.25801	0.96437
Bloc1s2	-0.07106	4786	9682	10724	4	-0.25712	-1.1481	0.14297	0.61353	0.25093	0.99964	-0.18606	-0.82907	0.24398	0.71339	0.40707	0.9649
Bloc1s3	-0.03566	5449	4401	4491	4	0.1399	0.45156	0.64476	0.92307	0.65159	0.99964	0.17556	0.56669	0.72646	0.93407	0.57092	0.96642
Bloc1s4	-0.006371	5981	5847	5584	4	0.087238	0.29969	0.86225	0.97292	0.76441	0.99964	0.093609	0.32155	0.97154	0.99589	0.74779	0.97751
Bloc1s5	0.42349	10746	8899	1778	4	0.31412	1.0353	0.14801	0.61857	0.30052	0.99964	-0.10937	-0.35607	0.37293	0.79286	0.72179	0.97435
Bloc1s6	0.09221	7608	2701	1188	4	0.37506	1.3052	0.077594	0.53651	0.19182	0.99964	0.28285	0.98132	0.37344	0.79286	0.32643	0.96437
Blvra	0.10317	7795	10602	10429	4	-0.21573	-0.82264	0.19236	0.67516	0.41071	0.99964	-0.3189	-1.2107	0.11536	0.57702	0.22601	0.96437
Blvrb	0.00869	6246	2987	2263	4	0.27301	1.1148	0.2256	0.70569	0.26491	0.99964	0.26432	1.0774	0.42719	0.81643	0.28129	0.96437
Blzf1	0.284867	9869	6618	1546	4	0.3339	0.98166	0.11981	0.59281	0.32627	0.99964	0.049033	0.14319	0.81533	0.96493	0.88614	0.99186
Bmf	-0.496634	435	809	7743	4	-0.017984	-0.058214	0.70133	0.94024	0.95358	0.99964	0.47865	1.5625	0.057255	0.48621	0.11817	0.96437
Bmi1	-0.1009	4283	2869	3924	4	0.17024	0.78795	0.53136	0.88127	0.43073	0.99964	0.27114	1.2535	0.40728	0.80828	0.21004	0.96437
Bmp1	-0.18473	2995	1844	4029	4	0.16393	0.54057	0.55341	0.89086	0.58881	0.99964	0.34866	1.1509	0.22065	0.69765	0.24979	0.96437
Bmp2	-0.18181	3031	1841	3978	4	0.16723	0.44437	0.5423	0.88545	0.65678	0.99964	0.34904	0.92947	0.21979	0.69589	0.35264	0.96437
Bmp2k	-0.55	302	1438	9894	4	-0.16171	-0.49708	0.2838	0.7546	0.61913	0.99964	0.38829	1.2003	0.1563	0.64515	0.23002	0.96437
Bmpr1a	-0.005189	5993	6282	6059	4	0.064541	0.17122	0.96206	0.99356	0.86405	0.99964	0.06973	0.18478	0.88592	0.98102	0.8534	0.98872
Bmpr2	0.188423	8920	9669	7318	4	0.0036934	0.014778	0.7814	0.95729	0.98821	0.99964	-0.18473	-0.73518	0.24586	0.71351	0.46223	0.96642
Bms1	1.20543	11674	11676	7969	4	-0.030772	-0.082377	0.65399	0.92441	0.93435	0.99964	-1.2362	-3.1825	0.0034182	0.18605	0.0014601	0.6617
Bmt2	-0.252281	2098	3745	8098	4	-0.037391	-0.19407	0.63023	0.91856	0.84612	0.99964	0.21489	1.1173	0.58477	0.88628	0.26388	0.96437
Bmyc	0.00197	6126	9635	10089	4	-0.17951	-0.61586	0.24859	0.72356	0.53799	0.99964	-0.18148	-0.62313	0.25004	0.71449	0.5332	0.96642
Bnip1	-0.44769	604	455	4920	4	0.1187	0.34089	0.73244	0.94523	0.73318	0.99964	0.56639	1.6396	0.0188	0.39855	0.10109	0.96437
Bnip2	-0.341297	1213	3234	9036	4	-0.093877	-0.35642	0.44266	0.83927	0.72152	0.99964	0.24742	0.9424	0.47676	0.84343	0.34599	0.96437
Bnip3	0.01683	6386	5715	4938	4	0.11794	0.43654	0.73543	0.94523	0.66244	0.99964	0.10111	0.37269	0.99855	0.9994	0.70938	0.97403
Bnip3l	-0.032409	5512	8283	9009	4	-0.092395	-0.54848	0.44804	0.84214	0.58336	0.99964	-0.059986	-0.35537	0.48513	0.84769	0.72231	0.97435
Boc	0.12299	8092	10940	10843	4	-0.27641	-1.174	0.12656	0.59951	0.24041	0.99964	-0.3994	-1.6885	0.076397	0.52041	0.091311	0.96437
Bod1	0.678637	11402	11526	8633	4	-0.069213	-0.25375	0.51974	0.8759	0.79969	0.99964	-0.74785	-2.7132	0.024953	0.41119	0.0066641	0.96183
Bod1l	-0.12388	3939	663	1120	4	0.38508	1.2355	0.069304	0.51705	0.21665	0.99964	0.50896	1.6333	0.039566	0.4287	0.10241	0.96437
Bola1	0.03781	6759	3489	2326	4	0.2686	0.74799	0.23543	0.71336	0.45446	0.99964	0.23079	0.64172	0.53384	0.86988	0.52106	0.96642
Bola2	-0.103776	4245	5138	6831	4	0.028234	0.10017	0.87865	0.97682	0.92021	0.99964	0.13201	0.46798	0.88746	0.98102	0.6398	0.97111
Bola3	-0.30563	1496	1063	4596	4	0.13508	0.37475	0.66484	0.92818	0.70785	0.99964	0.44071	1.2273	0.091096	0.54615	0.21971	0.96437
Bop1	0.1233	8096	7850	5483	4	0.092137	0.23755	0.84353	0.97075	0.81223	0.99964	-0.031163	-0.080007	0.56008	0.87562	0.93623	0.99565
Bora	-0.74037	84	268	9144	4	-0.10081	-0.21403	0.42557	0.83347	0.83052	0.99964	0.63956	1.3826	0.0065801	0.25246	0.1668	0.96437
Borcs5	-0.7862	70	68	5799	4	0.07729	0.19773	0.90694	0.97992	0.84326	0.99964	0.86349	2.2335	0.00025637	0.036585	0.025514	0.96437
Borcs6	0.22201	9277	10903	9943	4	-0.1656	-0.68844	0.27568	0.74584	0.49118	0.99964	-0.38761	-1.5966	0.080499	0.52617	0.11035	0.96437
Borcs7	0.280626	9838	8219	2949	4	0.22552	0.70016	0.34302	0.78865	0.48383	0.99964	-0.055106	-0.16954	0.49923	0.85836	0.86537	0.99077
Bpgm	-0.32395	1340	6131	10651	4	-0.24586	-1.2687	0.15459	0.63009	0.20455	0.99964	0.07809	0.40486	0.91232	0.98414	0.68558	0.9733
Bphl	-0.05595	5049	2885	3130	4	0.21455	0.9122	0.37848	0.81013	0.36167	0.99964	0.2705	1.1502	0.4089	0.80828	0.25005	0.96437
Bpnt1	-0.219184	2499	3144	6696	4	0.034246	0.11731	0.90386	0.97992	0.90661	0.99964	0.25343	0.87199	0.46052	0.83486	0.38321	0.96437
Bpnt2	0.04767	6892	4568	3142	4	0.21391	0.88615	0.38053	0.81199	0.37553	0.99964	0.16624	0.68683	0.76252	0.94724	0.49219	0.96642
Bptf	0.27804	9816	3112	400	4	0.5331	1.471	0.009571	0.27561	0.14129	0.99964	0.25506	0.69859	0.45488	0.83195	0.48481	0.96642
Braf	-0.19067	2903	896	2245	4	0.27415	1.1054	0.22321	0.70366	0.269	0.99964	0.46482	1.8767	0.068706	0.51009	0.060561	0.96437
Brap	-0.35791	1092	4021	9884	4	-0.16012	-0.40392	0.28636	0.75723	0.68627	0.99964	0.19779	0.50135	0.64134	0.90627	0.61613	0.97075
Brat1	0.42664	10758	10261	3933	4	0.16963	0.65015	0.5329	0.88127	0.5156	0.99964	-0.25701	-0.97289	0.16271	0.64854	0.33061	0.96437
Brca1	-0.428785	683	1000	6974	4	0.020975	0.05792	0.85079	0.97089	0.95381	0.99964	0.44976	1.2544	0.081952	0.52896	0.20969	0.96437
Brca2	0.356179	10371	7158	1217	4	0.37036	1.1311	0.082208	0.54747	0.25802	0.99964	0.014181	0.042782	0.69595	0.92566	0.96588	0.99685
Brcc3	0.22029	9264	10762	9544	4	-0.13132	-0.53901	0.34763	0.79329	0.58988	0.99964	-0.35161	-1.4337	0.096907	0.55377	0.15166	0.96437
Brd2	-0.7219	96	6982	11660	4	-0.69758	-1.5111	0.022133	0.37119	0.13077	0.99964	0.02432	0.05354	0.7303	0.9344	0.9573	0.99626
Brd3	-0.27536	1810	5538	9940	4	-0.16556	-0.80559	0.27585	0.74584	0.42048	0.99964	0.1098	0.53603	0.96958	0.99588	0.59194	0.97051
Brd4	0.31735	10117	7228	1627	4	0.32726	0.8485	0.12895	0.6027	0.39616	0.99964	0.0099105	0.025401	0.68082	0.91972	0.97973	0.99847
Brd7	-0.15807	3418	9843	11224	4	-0.36121	-1.3936	0.072894	0.5239	0.16343	0.99964	-0.20314	-0.78764	0.22099	0.69779	0.43091	0.96642
Brd8	0.274476	9782	10492	7844	4	-0.023744	-0.097444	0.67869	0.93147	0.92237	0.99964	-0.29822	-1.2136	0.12912	0.60056	0.22492	0.96437
Brd9	-1.08439	26	12	6596	4	0.03931	0.064516	0.92429	0.98274	0.94856	0.99964	1.1237	1.874	0	0	0.060931	0.96437
Brdt	0.31359	10090	9498	4363	4	0.1464	0.73711	0.61887	0.91581	0.46106	0.99964	-0.16719	-0.83688	0.27064	0.72838	0.40266	0.96437
Brf1	0.012704	6316	6566	6068	4	0.064213	0.091331	0.9636	0.99383	0.92723	0.99964	0.051509	0.073044	0.82362	0.96604	0.94177	0.99565
Brf2	0.08965	7563	3918	2006	4	0.29287	0.63117	0.18433	0.66698	0.52793	0.99964	0.20322	0.4353	0.62331	0.90187	0.66335	0.97301
Bri3	0.367608	10442	8033	1668	4	0.32454	0.91629	0.13297	0.60398	0.35951	0.99964	-0.043068	-0.12044	0.53093	0.86847	0.90413	0.99413
Bri3bp	-0.252779	2092	3005	7180	4	0.010161	0.032487	0.80918	0.96406	0.97408	0.99964	0.26294	0.84405	0.43104	0.81827	0.39864	0.96437
Brip1	-0.25697	2033	9135	11321	4	-0.3879	-1.4126	0.062126	0.50103	0.15777	0.99964	-0.13093	-0.47869	0.33251	0.77104	0.63216	0.97075
Brix1	0.21474	9207	11220	10883	4	-0.28331	-0.56025	0.11972	0.59281	0.57531	0.99964	-0.49805	-0.97581	0.046744	0.45659	0.32916	0.96437
Brk1	-0.370918	1002	2866	9128	4	-0.099628	-0.38476	0.42779	0.83441	0.70042	0.99964	0.27129	1.0521	0.40702	0.80828	0.29276	0.96437
Brms1	-0.06825	4824	5536	6549	4	0.04162	0.15861	0.93582	0.9856	0.87398	0.99964	0.10987	0.41812	0.96941	0.99588	0.67586	0.9733
Brms1l	0.287551	9902	5862	1152	4	0.38005	1.2536	0.073321	0.52465	0.21	0.99964	0.092499	0.30289	0.96795	0.99588	0.76197	0.97921
Brox	-0.111735	4126	8529	10219	4	-0.19185	-1.0731	0.22714	0.70716	0.28323	0.99964	-0.080115	-0.44886	0.43377	0.81978	0.65353	0.97206
Brpf1	-0.559018	285	352	6441	4	0.047012	0.17675	0.95975	0.99258	0.85971	0.99964	0.60603	2.2855	0.010511	0.30597	0.022285	0.96437
Brpf3	-0.06855	4817	3552	4147	4	0.15845	0.73798	0.57212	0.89856	0.46053	0.99964	0.227	1.0586	0.54521	0.8716	0.2898	0.96437
Brwd1	-0.073041	4745	5654	6770	4	0.030959	0.11033	0.88959	0.97813	0.91215	0.99964	0.104	0.37065	0.99077	0.99785	0.7109	0.97403
Brwd3	-0.048654	5197	7166	8049	4	-0.034933	-0.2535	0.63912	0.92038	0.79988	0.99964	0.013721	0.099459	0.69424	0.92566	0.92077	0.99432
Bscl2	-0.22688	2410	1453	4108	4	0.16025	0.48683	0.5664	0.89628	0.62638	0.99964	0.38713	1.1815	0.15818	0.64601	0.2374	0.96437
Bsdc1	-0.253087	2085	8019	10948	4	-0.29513	-1.4555	0.11178	0.58159	0.14553	0.99964	-0.042043	-0.20751	0.53358	0.86988	0.83561	0.98591
Bsg	0.407338	10654	8077	1280	4	0.36157	1.4015	0.089472	0.55695	0.16108	0.99964	-0.045768	-0.17571	0.52453	0.86678	0.86052	0.98898
Bsn	0.052812	6982	6523	5159	4	0.10754	0.41963	0.78029	0.95705	0.67476	0.99964	0.054728	0.21301	0.83439	0.97096	0.83132	0.98591
Bst1	0.177864	8780	7053	3441	4	0.19792	0.54608	0.43027	0.83441	0.58501	0.99964	0.020056	0.05499	0.7156	0.93055	0.95615	0.99626
Bst2	-0.5766	253	969	9432	4	-0.12292	-0.55325	0.36549	0.8012	0.5801	0.99964	0.45368	2.0623	0.078021	0.52189	0.039175	0.96437
Btaf1	-0.213533	2572	8619	10976	4	-0.30105	-0.81134	0.10784	0.57453	0.41717	0.99964	-0.087517	-0.23912	0.41685	0.81205	0.81101	0.98565
Btbd1	0.072362	7287	7777	6462	4	0.0459	0.24126	0.95496	0.99131	0.80935	0.99964	-0.026462	-0.13867	0.57443	0.88146	0.88971	0.99264
Btbd10	-0.313463	1422	2633	7877	4	-0.025483	-0.092299	0.67322	0.93078	0.92646	0.99964	0.28798	1.0465	0.36011	0.78525	0.29532	0.96437
Btbd2	0.076437	7365	8957	8127	4	-0.038953	-0.17511	0.62374	0.91581	0.861	0.99964	-0.11539	-0.51692	0.36148	0.78552	0.60521	0.97075
Btbd3	0.2851	9873	9953	6015	4	0.06723	0.34342	0.95069	0.98968	0.73129	0.99964	-0.21787	-1.1059	0.20133	0.67612	0.26876	0.96437
Btbd6	0.178129	8783	9211	6600	4	0.039139	0.17733	0.92377	0.98255	0.85925	0.99964	-0.13899	-0.62655	0.31721	0.76019	0.53096	0.96642
Btbd7	0.21131	9170	10751	9622	4	-0.13748	-0.61882	0.33268	0.78343	0.53604	0.99964	-0.34879	-1.5582	0.097932	0.55604	0.11918	0.96437
Btbd8	-0.215453	2542	3754	7423	8	-0.0013933	-0.0066312	0.70731	0.94123	0.99471	0.99964	0.21406	1.0207	0.423	0.81434	0.30741	0.96437
Btbd9	0.390151	10566	7922	1341	4	0.35432	1.1832	0.096479	0.56848	0.23671	0.99964	-0.035831	-0.11828	0.54854	0.8731	0.90585	0.99413
Btd	0.1026	7788	4807	2512	4	0.25422	0.86534	0.26824	0.74173	0.38685	0.99964	0.15162	0.5139	0.81636	0.96495	0.60732	0.97075
Btf3	-0.54258	312	116	3121	4	0.21496	0.20545	0.37737	0.80998	0.83722	0.99964	0.75754	0.74061	0.0013673	0.12121	0.45893	0.96642
Btf3l4	-0.42905	681	359	3852	4	0.17406	0.40265	0.51538	0.87466	0.6872	0.99964	0.60311	1.4008	0.011451	0.32683	0.16128	0.96437
Btg1	-0.21691	2526	1842	4658	4	0.13193	0.54874	0.67655	0.931	0.58319	0.99964	0.34884	1.452	0.22022	0.69686	0.1465	0.96437
Btg2	0.0200015	6426	7236	6806	4	0.029648	0.056579	0.88481	0.97808	0.95488	0.99964	0.0096465	0.018414	0.67946	0.91911	0.98531	0.99847
Btk	0.467712	10935	10897	5720	4	0.081072	0.29648	0.89233	0.97813	0.76686	0.99964	-0.38664	-1.3962	0.081354	0.5283	0.16264	0.96437
Btrc	0.123571	8104	8688	6769	4	0.030977	0.12433	0.88959	0.97813	0.90106	0.99964	-0.092594	-0.37021	0.406	0.80828	0.71123	0.97403
Bub1	-0.34649	1167	357	2469	4	0.25729	0.73246	0.26166	0.73641	0.46389	0.99964	0.60378	1.7283	0.011109	0.31941	0.083928	0.96437
Bub1b	0.63778	11345	11047	3161	4	0.21266	0.56492	0.38412	0.81288	0.57213	0.99964	-0.42512	-1.1042	0.066484	0.50812	0.2695	0.96437
Bub3	-0.31404	1418	472	2610	4	0.24696	0.41709	0.28704	0.75743	0.67661	0.99964	0.561	0.96745	0.020509	0.40541	0.33332	0.96437
Bud13	-0.4543	577	2817	10101	4	-0.18031	-0.4742	0.24705	0.72356	0.63536	0.99964	0.27399	0.72466	0.39831	0.80772	0.46866	0.96642
Bud23	0.1008	7763	4987	2701	4	0.2414	0.59844	0.30097	0.76443	0.54955	0.99964	0.1406	0.3461	0.85797	0.9764	0.72927	0.97458
Bysl	1.00586	11624	11481	1710	4	0.32002	0.80261	0.13989	0.61353	0.4222	0.99964	-0.68584	-1.675	0.026748	0.41119	0.093937	0.96437
Bzw1	-0.297995	1560	1778	6244	4	0.056255	0.27135	0.99915	0.99949	0.78612	0.99964	0.35425	1.7118	0.21039	0.68583	0.086937	0.96437
Bzw2	-0.17888	3072	2538	4998	4	0.11606	0.43455	0.74321	0.94646	0.66389	0.99964	0.29494	1.1061	0.34327	0.77576	0.26868	0.96437
C130026I21Rik	1.4266	11693	11660	1623	4	0.3278	0.38803	0.12827	0.60209	0.698	0.99964	-1.0988	-1.2527	0.0091437	0.28836	0.21031	0.96437
C130050O18Rik	-0.30639	1488	5467	10222	4	-0.19216	-0.75711	0.22629	0.70689	0.44898	0.99964	0.11423	0.45279	0.95308	0.992	0.6507	0.97206
C130074G19Rik	-0.00398	6016	10386	10878	4	-0.28195	-0.95088	0.12135	0.59389	0.34167	0.99964	-0.27797	-0.93881	0.14399	0.62338	0.34783	0.96437
C1d	0.04575	6879	1952	1112	4	0.38645	0.97553	0.068792	0.51705	0.3293	0.99964	0.3407	0.85877	0.23697	0.70614	0.39047	0.96437
C1galt1	0.28582	9882	2480	279	4	0.58509	2.0927	0.0047001	0.19298	0.036373	0.99964	0.29927	1.0643	0.33242	0.77104	0.28718	0.96437
C1galt1c1	0.55592	11177	11511	10023	4	-0.17378	-0.64132	0.25867	0.73295	0.52132	0.99964	-0.7297	-2.6418	0.025551	0.41119	0.0082457	0.96437
C1qa	0.101656	7774	9586	8744	4	-0.075044	-0.41191	0.49983	0.86632	0.68041	0.99964	-0.1767	-0.96728	0.25731	0.7193	0.33341	0.96437
C1qb	0.203396	9078	5940	2020	4	0.29142	1.6072	0.18646	0.6689	0.10801	0.99964	0.088024	0.48294	0.94941	0.99064	0.62914	0.97075
C1qbp	-0.4442	616	716	6313	4	0.05311	0.16196	0.98693	0.99724	0.87134	0.99964	0.49731	1.5259	0.046659	0.45614	0.12705	0.96437
C1qc	0.0288	6593	3337	2312	4	0.26912	1.18	0.23398	0.71291	0.23801	0.99964	0.24032	1.0525	0.50231	0.85931	0.29259	0.96437
C1ql1	-0.24044	2238	5423	9453	4	-0.12408	-0.38791	0.36207	0.80045	0.69808	0.99964	0.11636	0.36499	0.94386	0.98952	0.71512	0.97403
C1qtnf12	-0.055202	5066	5243	5929	4	0.071488	0.28998	0.93189	0.9856	0.77183	0.99964	0.12669	0.51325	0.90677	0.98341	0.60778	0.97075
C1ra	0.066507	7201	6853	5312	4	0.099659	0.45673	0.81243	0.96451	0.64786	0.99964	0.033152	0.15139	0.76107	0.94624	0.87967	0.99169
C1rl	0.254	9609	1745	238	4	0.61124	2.0174	0.0035037	0.16872	0.043655	0.99964	0.35724	1.1736	0.20475	0.6801	0.24055	0.96437
C1s1	-0.116124	4040	5578	7553	4	-0.0083343	-0.036547	0.73509	0.94523	0.97085	0.99964	0.10779	0.47249	0.97565	0.9966	0.63658	0.97075
C1s2	-0.09351	4419	9758	10903	4	-0.28812	-1.2421	0.11588	0.58398	0.21419	0.99964	-0.19461	-0.83854	0.23184	0.70305	0.40173	0.96437
C2	0.16192	8575	5131	1990	4	0.29428	1.0147	0.18228	0.66542	0.31023	0.99964	0.13236	0.45447	0.88669	0.98102	0.64949	0.97206
C2cd2	0.104004	7805	6145	3728	4	0.18116	1.042	0.48795	0.86156	0.2974	0.99964	0.077156	0.44226	0.90908	0.98363	0.6583	0.97206
C2cd2l	0.36178	10410	8886	2519	4	0.25349	1.2496	0.26987	0.74254	0.21145	0.99964	-0.10829	-0.53006	0.37498	0.79406	0.59607	0.97075
C2cd4c	-0.025559	5630	7989	8578	4	-0.065932	-0.31781	0.53034	0.88098	0.75063	0.99964	-0.040373	-0.19422	0.53845	0.87092	0.84601	0.98699
C2cd5	-0.346315	1170	2339	8100	4	-0.037495	-0.17222	0.62998	0.91856	0.86326	0.99964	0.30882	1.4214	0.30593	0.75178	0.15521	0.96437
C330007P06Rik	-0.406968	789	6842	11265	4	-0.37274	-0.77279	0.068364	0.51705	0.43965	0.99964	0.034228	0.071241	0.7644	0.94807	0.94321	0.99565
C330018D20Rik	0.24666	9538	7911	3189	4	0.21125	0.7036	0.38934	0.81795	0.48168	0.99964	-0.03541	-0.11723	0.54965	0.8731	0.90668	0.99413
C3ar1	0.26578	9713	4948	979	4	0.40902	1.2769	0.053068	0.48574	0.20162	0.99964	0.14324	0.44399	0.84917	0.97498	0.65705	0.97206
C4b	-0.58531	241	840	9298	4	-0.11205	-0.41355	0.39523	0.82091	0.6792	0.99964	0.47326	1.7588	0.061015	0.49275	0.078616	0.96437
C4bp	0.276909	9803	5769	1186	4	0.37516	1.7094	0.077508	0.53651	0.087375	0.99964	0.098251	0.44575	0.98735	0.99767	0.65578	0.97206
C5ar1	-0.59281	234	848	9410	4	-0.12082	-0.37032	0.37036	0.80483	0.71114	0.99964	0.47199	1.4571	0.062212	0.4949	0.14509	0.96437
C5ar2	-0.04351	5283	1326	1291	4	0.36043	1.1041	0.090241	0.55695	0.26953	0.99964	0.40394	1.2393	0.13271	0.60567	0.21525	0.96437
C77080	-0.18956	2922	1811	4075	4	0.16188	0.52376	0.56084	0.89378	0.60045	0.99964	0.35144	1.1419	0.2156	0.69094	0.25349	0.96437
C87436	-0.13223	3806	5908	8198	4	-0.04244	-0.14278	0.61041	0.91214	0.88647	0.99964	0.08979	0.30191	0.95761	0.99309	0.76272	0.97921
C8a	0.192577	8962	9897	7759	4	-0.018673	-0.08837	0.69885	0.93946	0.92958	0.99964	-0.21125	-0.99396	0.20911	0.68448	0.32024	0.96437
C8b	0.01231	6306	6025	5389	4	0.095939	0.38908	0.82781	0.9698	0.69721	0.99964	0.083629	0.3383	0.93206	0.98725	0.73514	0.97601
C8g	-0.12984	3848	868	1503	4	0.33877	1.2377	0.11263	0.58239	0.21582	0.99964	0.46861	1.7139	0.06563	0.5066	0.086545	0.96437
C9	0.032687	6655	6989	6236	4	0.056755	0.24981	0.9988	0.99949	0.80274	0.99964	0.024068	0.10564	0.72953	0.9344	0.91587	0.99413
C9orf72	-0.02843	5582	9600	10352	4	-0.20628	-0.74292	0.20552	0.68832	0.45753	0.99964	-0.17785	-0.63999	0.25594	0.71917	0.52218	0.96642
Caap1	0.51172	11066	2022	58	4	0.84596	1.8413	8.5455e-05	0.016129	0.065579	0.99964	0.33424	0.72105	0.24936	0.71432	0.47088	0.96642
Cab39	0.25718	9633	10967	9748	4	-0.14822	-0.41743	0.31183	0.76954	0.67636	0.99964	-0.4054	-1.1308	0.074175	0.5181	0.25815	0.96437
Cab39l	0.05621	7031	9976	9938	4	-0.16537	-0.93308	0.27594	0.74584	0.35078	0.99964	-0.22158	-1.2468	0.1986	0.67553	0.21247	0.96437
Cabin1	0.01292	6324	2112	1496	4	0.33934	0.88009	0.11212	0.58226	0.37881	0.99964	0.32642	0.84412	0.26679	0.72706	0.39861	0.96437
Cables1	0.031319	6634	9023	8977	4	-0.090401	-0.39906	0.45283	0.84326	0.68985	0.99964	-0.12172	-0.53595	0.35028	0.77955	0.59199	0.97051
Cables2	-0.181041	3042	4960	8124	4	-0.038841	-0.10507	0.62417	0.91595	0.91632	0.99964	0.1422	0.38746	0.85285	0.9764	0.69841	0.9733
Cacfd1	-0.1599	3381	743	1574	4	0.33198	0.86685	0.12263	0.59462	0.38602	0.99964	0.49188	1.2881	0.049991	0.46693	0.1977	0.96437
Cacna1a	-0.204709	2685	3129	6395	4	0.049431	0.18488	0.97009	0.99527	0.85332	0.99964	0.25414	0.95056	0.45796	0.83349	0.34183	0.96437
Cacna1b	0.07656	7368	10016	9756	4	-0.14891	-0.63983	0.30986	0.76917	0.52228	0.99964	-0.22547	-0.96533	0.19475	0.67414	0.33438	0.96437
Cacna1d	0.01106	6282	10490	10897	4	-0.28674	-1.08	0.1175	0.58786	0.28015	0.99964	-0.2978	-1.1211	0.12947	0.60167	0.26226	0.96437
Cacna2d4	-0.22002	2490	1979	4956	4	0.11739	0.49046	0.73731	0.94523	0.62381	0.99964	0.33741	1.4114	0.24398	0.71339	0.15811	0.96437
Cacnb1	-0.009736	5909	8692	9171	4	-0.10254	-0.45522	0.42018	0.82968	0.64895	0.99964	-0.092804	-0.41149	0.40574	0.80828	0.68071	0.9733
Cacnb3	-0.316476	1394	2017	7030	4	0.018044	0.07578	0.84122	0.97043	0.93959	0.99964	0.33452	1.4087	0.24876	0.71411	0.15893	0.96437
Cacnb4	-0.11704	4025	7205	9220	4	-0.10595	-0.504	0.41096	0.82539	0.61426	0.99964	0.01109	0.052714	0.6851	0.92192	0.95796	0.99626
Cacng8	0.373639	10481	10836	7306	4	0.0041591	0.025951	0.78397	0.95873	0.9793	0.99964	-0.36948	-2.2888	0.088703	0.54317	0.022092	0.96437
Cactin	0.418417	10717	11110	7941	4	-0.029253	-0.080961	0.65852	0.92509	0.93547	0.99964	-0.44767	-1.2191	0.059733	0.49275	0.22281	0.96437
Cacul1	-0.0509	5157	3317	3577	4	0.19043	0.62558	0.45539	0.84386	0.53159	0.99964	0.24133	0.7927	0.49906	0.85836	0.42795	0.96642
Cacybp	-0.06013	4974	10130	10972	4	-0.30043	-0.77508	0.10827	0.57453	0.43829	0.99964	-0.2403	-0.62053	0.17946	0.66237	0.53491	0.96642
Cad	0.13819	8275	1800	579	4	0.49068	1.1117	0.017347	0.33946	0.26626	0.99964	0.35249	0.79313	0.21364	0.69004	0.4277	0.96642
Cadm1	-0.48799	458	1492	9193	4	-0.10442	-0.47666	0.41472	0.82689	0.6336	0.99964	0.38357	1.7593	0.16288	0.64854	0.078522	0.96437
Cadm4	-0.35903	1086	4931	10421	4	-0.21483	-0.84893	0.19398	0.67599	0.39592	0.99964	0.1442	0.57109	0.84541	0.97401	0.56794	0.96642
Cadps	0.00048	6101	5523	5094	4	0.11085	0.61748	0.76713	0.95439	0.53692	0.99964	0.11037	0.61385	0.96787	0.99588	0.53931	0.96642
Cage1	-0.13959	3694	2444	4073	4	0.16206	0.75653	0.5605	0.8936	0.44933	0.99964	0.30165	1.4084	0.32576	0.76546	0.15901	0.96437
Calcoco1	0.11136	7917	4752	2365	4	0.2661	0.88034	0.24286	0.72039	0.37867	0.99964	0.15474	0.51038	0.80499	0.96212	0.60979	0.97075
Calcrl	0.342185	10276	10738	7445	4	-0.0027255	-0.013264	0.75714	0.95105	0.98942	0.99964	-0.34491	-1.6659	0.1005	0.56002	0.095725	0.96437
Cald1	-0.292193	1625	2891	7815	4	-0.022063	-0.079022	0.68527	0.93333	0.93701	0.99964	0.27013	0.96913	0.4101	0.80845	0.33248	0.96437
Calhm2	-0.334196	1263	2814	8494	4	-0.060086	-0.23251	0.54828	0.88938	0.81614	0.99964	0.27411	1.0643	0.39788	0.80749	0.28721	0.96437
Calhm6	-0.52932	347	2821	10710	4	-0.25573	-1.1235	0.14382	0.61446	0.26122	0.99964	0.27359	1.2106	0.39968	0.80772	0.22604	0.96437
Calm1	-0.0968	4353	9982	11069	4	-0.31888	-1.2626	0.094941	0.56396	0.20672	0.99964	-0.22208	-0.87747	0.19774	0.67542	0.38023	0.96437
Calm2	-0.053706	5099	6376	7171	4	0.010442	0.050557	0.81012	0.9641	0.95968	0.99964	0.064148	0.31071	0.86677	0.97863	0.75602	0.97906
Calm3	-0.21585	2534	1893	4720	4	0.12914	0.47232	0.68792	0.93442	0.6367	0.99964	0.34499	1.2657	0.22911	0.70238	0.20562	0.96437
Calr	-0.09599	4368	1087	1481	4	0.34113	1.1977	0.1099	0.57744	0.23104	0.99964	0.43712	1.5343	0.09383	0.55115	0.12495	0.96437
Calr3	0.10499	7828	2767	1133	4	0.38301	1.3138	0.071099	0.51903	0.1889	0.99964	0.27802	0.95018	0.38728	0.8017	0.34202	0.96437
Calu	-0.06266	4928	364	386	4	0.53836	1.201	0.0091437	0.27436	0.22977	0.99964	0.60102	1.3399	0.011878	0.33254	0.18028	0.96437
Camk1	0.100234	7754	7670	5714	4	0.081399	0.33346	0.89104	0.97813	0.73879	0.99964	-0.018835	-0.076805	0.59785	0.89269	0.93878	0.99565
Camk1d	-0.3002	1542	1203	4868	4	0.12139	0.34324	0.72142	0.94381	0.73142	0.99964	0.42159	1.1963	0.10947	0.56801	0.23157	0.96437
Camk2a	-0.11117	4132	1840	2759	4	0.23789	1.2581	0.30926	0.76917	0.20834	0.99964	0.34906	1.8451	0.21962	0.69553	0.065018	0.96437
Camk2d	-0.18205	3025	2244	4619	4	0.13355	0.48558	0.67065	0.93052	0.62727	0.99964	0.3156	1.1481	0.29046	0.74415	0.25092	0.96437
Camk2g	0.12861	8167	5023	2346	4	0.26707	0.86112	0.24056	0.71943	0.38917	0.99964	0.13846	0.44422	0.86524	0.97863	0.65689	0.97206
Camk2n1	-0.400912	818	1823	8343	4	-0.050232	-0.25702	0.58229	0.90161	0.79716	0.99964	0.35068	1.7999	0.21672	0.69138	0.071874	0.96437
Camk2n2	0.018379	6408	5903	5147	4	0.10833	0.52009	0.7779	0.95705	0.603	0.99964	0.089951	0.43106	0.95821	0.99309	0.66642	0.9733
Camkk1	0.331722	10217	8191	2188	4	0.2784	1.0245	0.21321	0.69668	0.30561	0.99964	-0.053322	-0.19487	0.5041	0.85954	0.84549	0.98699
Camkk2	-0.04656	5231	4458	4784	4	0.12581	0.61146	0.70364	0.94034	0.54089	0.99964	0.17237	0.83737	0.73825	0.93786	0.40238	0.96437
Camkmt	0.040292	6804	7032	6126	4	0.061669	0.28105	0.97539	0.99538	0.77867	0.99964	0.021377	0.097193	0.72022	0.9323	0.92257	0.99432
Caml	0.67363	11397	11127	3039	4	0.22012	0.29704	0.36071	0.79989	0.76643	0.99964	-0.45351	-0.59361	0.05811	0.48956	0.55278	0.96642
Camsap1	-0.12728	3887	2176	3512	4	0.19387	0.81568	0.44386	0.83937	0.41469	0.99964	0.32115	1.3517	0.2773	0.73339	0.17646	0.96437
Camsap2	0.18417	8871	11196	10959	4	-0.29765	-0.90478	0.10981	0.57744	0.36558	0.99964	-0.48182	-1.4564	0.049906	0.46693	0.14528	0.96437
Camta1	0.495053	11022	11093	6285	4	0.054563	0.1573	0.99248	0.9988	0.87501	0.99964	-0.44049	-1.2502	0.061528	0.49385	0.21121	0.96437
Camta2	0.111158	7915	9423	8327	4	-0.048992	-0.2423	0.58597	0.90306	0.80854	0.99964	-0.16015	-0.78874	0.28123	0.73504	0.43026	0.96642
Cand1	-0.20987	2612	3273	6675	4	0.03512	0.1132	0.90839	0.97992	0.90987	0.99964	0.24499	0.79065	0.48436	0.84735	0.42915	0.96642
Cant1	-0.256691	2037	8493	11132	4	-0.33356	-1.4798	0.08631	0.55464	0.13892	0.99964	-0.076869	-0.34227	0.44104	0.82457	0.73215	0.97535
Canx	-0.35121	1140	4655	10206	4	-0.19061	-0.70702	0.22842	0.70716	0.47956	0.99964	0.1606	0.59741	0.78405	0.95534	0.55023	0.96642
Cap1	-0.46421	543	32	387	4	0.53759	0.81388	0.0092292	0.27561	0.41572	0.99964	1.0018	1.5237	0	0	0.12759	0.96437
Capg	-0.56026	282	2649	10822	4	-0.27337	-0.99217	0.12989	0.6027	0.32111	0.99964	0.28689	1.051	0.36319	0.7862	0.29327	0.96437
Capn10	0.22759	9344	5343	1406	4	0.34884	1.2551	0.10212	0.57095	0.20945	0.99964	0.12125	0.43377	0.92557	0.98652	0.66446	0.97326
Capn12	0.151176	8440	8524	5928	4	0.071534	0.19126	0.93138	0.98544	0.84832	0.99964	-0.079642	-0.21187	0.43497	0.81978	0.83221	0.98591
Capn15	0.11642	7999	4253	1925	4	0.3001	1.2474	0.17271	0.65564	0.21223	0.99964	0.18368	0.76033	0.6968	0.92569	0.44706	0.96642
Capn2	0.13979	8294	1702	529	4	0.50153	1.6151	0.014869	0.32044	0.10628	0.99964	0.36174	1.16	0.19757	0.67542	0.24604	0.96437
Capn5	-0.042369	5311	5155	5552	4	0.089061	0.39707	0.85515	0.97128	0.69132	0.99964	0.13143	0.58593	0.88934	0.98102	0.55792	0.96642
Capn7	-0.347027	1163	1264	6049	4	0.065273	0.25692	0.95924	0.99257	0.79724	0.99964	0.4123	1.6281	0.12075	0.58697	0.1035	0.96437
Capns1	0.320692	10141	10798	8132	4	-0.039148	-0.19553	0.62348	0.91581	0.84498	0.99964	-0.35984	-1.7841	0.093488	0.5503	0.074404	0.96437
Caprin1	0.171183	8692	9686	7689	4	-0.015047	-0.049567	0.71065	0.94166	0.96047	0.99964	-0.18623	-0.60902	0.24389	0.71339	0.54251	0.96642
Caprin2	0.02816	6583	6076	5127	4	0.10929	0.38756	0.77363	0.95587	0.69834	0.99964	0.08113	0.28708	0.92292	0.98595	0.77405	0.98203
Capza1	0.102404	7783	6593	4254	4	0.1529	0.41987	0.59383	0.90541	0.67458	0.99964	0.050496	0.13815	0.82046	0.96604	0.89012	0.99264
Capza2	-0.092507	4436	5345	6825	4	0.028553	0.12744	0.87968	0.97712	0.89859	0.99964	0.12106	0.54105	0.92625	0.98653	0.58847	0.96993
Capzb	0.55707	11180	5012	153	4	0.69597	0.95309	0.00094001	0.070968	0.34055	0.99964	0.1389	0.1845	0.86421	0.97833	0.85362	0.98872
Car12	0.289121	9923	9999	6053	4	0.065151	0.25533	0.95967	0.99258	0.79846	0.99964	-0.22397	-0.8711	0.19612	0.67542	0.3837	0.96437
Car13	-0.214444	2556	4059	7762	4	-0.018734	-0.074478	0.69868	0.93946	0.94063	0.99964	0.19571	0.78047	0.64929	0.90742	0.43511	0.96642
Car2	0.31805	10121	3741	399	4	0.53315	1.5865	0.009571	0.27561	0.11264	0.99964	0.2151	0.63558	0.58426	0.88613	0.52505	0.96642
Car3	0.36757	10441	4762	453	4	0.52146	1.3212	0.011536	0.29158	0.18643	0.99964	0.15389	0.38631	0.80798	0.96313	0.69927	0.9733
Car5b	0.155707	8495	7656	4540	4	0.13762	0.47025	0.65348	0.92441	0.63818	0.99964	-0.018087	-0.06152	0.59981	0.89324	0.95094	0.9959
Car7	0.00885	6251	9216	9532	4	-0.13033	-0.55363	0.34943	0.79414	0.57983	0.99964	-0.13918	-0.5903	0.31695	0.75993	0.55499	0.96642
Car8	-0.246659	2166	4162	8445	4	-0.057299	-0.19136	0.55734	0.89086	0.84824	0.99964	0.18936	0.63493	0.67459	0.91791	0.52547	0.96642
Car9	0.18995	8931	3942	1080	4	0.39217	1.7543	0.064006	0.50268	0.079375	0.99964	0.20222	0.90191	0.62656	0.90187	0.3671	0.96437
Card10	0.0132	6328	4053	3229	4	0.20924	0.56761	0.39523	0.82091	0.5703	0.99964	0.19604	0.53075	0.64809	0.90663	0.59559	0.97075
Card11	0.238097	9444	10123	7417	4	-0.0012827	-0.0052657	0.7626	0.95285	0.9958	0.99964	-0.23938	-0.97764	0.18031	0.66269	0.32825	0.96437
Card14	-0.04162	5330	4611	4859	4	0.12179	0.45165	0.71936	0.94372	0.65152	0.99964	0.16341	0.60583	0.77346	0.95074	0.54463	0.96642
Card19	0.091335	7590	6399	4237	4	0.15374	0.65322	0.59067	0.90412	0.51362	0.99964	0.062405	0.26426	0.86019	0.97681	0.79158	0.98507
Card6	-0.204796	2684	6300	9613	4	-0.13671	-0.648	0.33422	0.78466	0.51698	0.99964	0.068086	0.32375	0.87951	0.98021	0.74613	0.97686
Card9	-0.20888	2630	2299	5249	4	0.10286	0.47155	0.80003	0.96271	0.63725	0.99964	0.31174	1.4306	0.29969	0.74925	0.15255	0.96437
Carf	-0.36376	1061	3343	9447	4	-0.12379	-0.38462	0.36327	0.80045	0.70052	0.99964	0.23997	0.74915	0.50308	0.85931	0.45377	0.96642
Carhsp1	-0.2178	2514	678	2064	4	0.28812	1.0468	0.1927	0.67576	0.29519	0.99964	0.50592	1.8439	0.041873	0.438	0.065202	0.96437
Carm1	-0.00473	6001	4894	4473	4	0.14083	0.60966	0.63921	0.92039	0.54209	0.99964	0.14556	0.62921	0.84011	0.97311	0.52921	0.96642
Carmil1	-0.09385	4408	3159	4144	4	0.15858	0.61413	0.57178	0.89856	0.53913	0.99964	0.25243	0.97756	0.46334	0.83673	0.32829	0.96437
Carnmt1	0.30978	10066	9386	4249	4	0.15322	0.53107	0.59263	0.90453	0.59537	0.99964	-0.15656	-0.53748	0.28696	0.74112	0.59094	0.97026
Carns1	-0.03804	5404	3778	3847	4	0.17437	0.54741	0.51436	0.87409	0.5841	0.99964	0.21241	0.66605	0.59255	0.89	0.50538	0.96642
Cars	0.692549	11423	8270	211	4	0.63369	1.0376	0.0027346	0.14655	0.29948	0.99964	-0.058859	-0.094332	0.48829	0.85055	0.92485	0.99432
Cars2	-0.333588	1266	1951	7248	4	0.0071516	0.021972	0.7967	0.96194	0.98247	0.99964	0.34074	1.0559	0.23697	0.70614	0.29104	0.96437
Casc1	0.3253	10181	5104	713	4	0.45937	1.622	0.027004	0.38631	0.10481	0.99964	0.13407	0.47077	0.88096	0.9805	0.63781	0.97075
Casc3	-0.00865	5936	3872	3454	4	0.19726	0.49191	0.43206	0.8357	0.62279	0.99964	0.20591	0.51175	0.61511	0.89851	0.60882	0.97075
Casd1	-0.12854	3870	5401	7606	4	-0.01108	-0.047616	0.72458	0.94421	0.96202	0.99964	0.11746	0.50493	0.94078	0.98923	0.61361	0.97075
Cask	-0.012107	5862	5782	5627	4	0.085244	0.34711	0.87301	0.97546	0.72851	0.99964	0.097351	0.39588	0.98419	0.99758	0.6922	0.9733
Caskin1	-0.139831	3689	8161	10213	4	-0.19126	-0.84045	0.22782	0.70716	0.40066	0.99964	-0.051429	-0.22599	0.51	0.8628	0.82121	0.98591
Caskin2	0.029957	6611	8442	8211	4	-0.043078	-0.18491	0.60776	0.91051	0.8533	0.99964	-0.073035	-0.31268	0.45146	0.83145	0.75453	0.97894
Casp1	0.151108	8439	9741	8186	4	-0.041812	-0.17435	0.61272	0.91219	0.86159	0.99964	-0.19292	-0.80043	0.2344	0.70501	0.42346	0.96642
Casp3	-0.17096	3193	183	431	4	0.52632	1.3514	0.011024	0.28924	0.17656	0.99964	0.69728	1.7912	0.0029909	0.1699	0.073263	0.96437
Casp7	0.18207	8837	4818	1558	4	0.33282	1.175	0.12118	0.59389	0.23999	0.99964	0.15075	0.52924	0.81952	0.96604	0.59664	0.97075
Casp8	0.344119	10289	7577	1583	4	0.33102	0.87839	0.12391	0.59549	0.37973	0.99964	-0.013099	-0.034322	0.61297	0.89786	0.97262	0.99752
Casp8ap2	0.340952	10266	6733	1138	4	0.38251	1.3409	0.071099	0.51903	0.17994	0.99964	0.041558	0.1444	0.79063	0.95816	0.88518	0.99186
Casp9	-0.561031	280	348	6448	4	0.046549	0.14214	0.95813	0.99204	0.88697	0.99964	0.60758	1.8655	0.010255	0.30303	0.062114	0.96437
Cass4	-0.160402	3370	7662	10077	4	-0.17898	-0.92196	0.24962	0.72356	0.35655	0.99964	-0.018578	-0.095728	0.59844	0.89281	0.92374	0.99432
Cast	-0.0597719	4982	6466	7419	4	-0.0012849	-0.0066164	0.7626	0.95285	0.99472	0.99964	0.058487	0.30114	0.84763	0.97465	0.76331	0.97941
Castor1	-0.308678	1460	1391	5601	4	0.086262	0.21677	0.86737	0.97391	0.82839	0.99964	0.39494	0.99706	0.14621	0.62835	0.31874	0.96437
Castor2	0.293157	9952	10344	6928	4	0.023307	0.10117	0.86045	0.9723	0.91941	0.99964	-0.26985	-1.1618	0.15057	0.6361	0.24533	0.96437
Casz1	-0.54391	310	2613	10702	4	-0.2548	-0.99144	0.14476	0.61469	0.32147	0.99964	0.28911	1.1332	0.35729	0.78363	0.25712	0.96437
Cat	0.01308	6326	2781	2033	4	0.29019	1.0523	0.18851	0.67082	0.29265	0.99964	0.27711	1.0027	0.38976	0.80225	0.316	0.96437
Catsper2	-0.169617	3217	5867	8778	4	-0.077327	-0.38085	0.49214	0.86225	0.70332	0.99964	0.09229	0.45527	0.96701	0.99588	0.64891	0.97206
Cav2	-0.277716	1784	2053	6294	4	0.053864	0.23352	0.99017	0.9981	0.81535	0.99964	0.33158	1.4401	0.2544	0.71877	0.14985	0.96437
Cavin1	0.7573	11495	9490	267	4	0.59039	1.7802	0.0043582	0.18613	0.075044	0.99964	-0.16691	-0.4943	0.27106	0.72838	0.62109	0.97075
Cbarp	-0.17593	3126	1116	2483	4	0.25611	1.1589	0.2644	0.73884	0.24648	0.99964	0.43204	1.9572	0.09853	0.55722	0.050323	0.96437
Cbfa2t2	0.087172	7523	7819	6218	4	0.057554	0.21777	0.99462	0.99889	0.82761	0.99964	-0.029618	-0.11153	0.56554	0.87795	0.9112	0.99413
Cbfa2t3	0.06288	7142	9599	9330	4	-0.11496	-0.46255	0.3854	0.81349	0.64369	0.99964	-0.17784	-0.71288	0.25594	0.71917	0.47592	0.96642
Cbfb	0.820533	11549	7864	84	4	0.78861	1.687	0.00017091	0.022727	0.091597	0.99964	-0.031923	-0.066517	0.55785	0.87513	0.94697	0.99584
Cbl	-0.0546	5076	2862	3094	4	0.21678	0.72707	0.37122	0.80549	0.46718	0.99964	0.27138	0.91149	0.40677	0.80828	0.36204	0.96437
Cblb	-0.111748	4125	4308	5980	4	0.069272	0.24146	0.94138	0.9864	0.8092	0.99964	0.18102	0.63248	0.70629	0.92743	0.52707	0.96642
Cbll1	0.49013	11011	10066	2464	4	0.25781	1.075	0.26055	0.73452	0.28239	0.99964	-0.23232	-0.95758	0.18715	0.66799	0.33828	0.96437
Cbr1	0.11441	7966	3529	1462	4	0.34288	1.2421	0.10784	0.57453	0.21421	0.99964	0.22847	0.82468	0.54008	0.87119	0.40956	0.96642
Cbr2	0.08518	7495	1779	814	4	0.43917	1.8174	0.03572	0.41888	0.069156	0.99964	0.35399	1.4609	0.21073	0.68583	0.14404	0.96437
Cbr3	-0.179847	3060	7814	10382	4	-0.20921	-1.0453	0.20133	0.68508	0.29589	0.99964	-0.029363	-0.14725	0.5664	0.87819	0.88293	0.99186
Cbr4	-0.192358	2879	3448	6562	4	0.041052	0.15864	0.93386	0.9856	0.87395	0.99964	0.23341	0.90252	0.52495	0.86678	0.36678	0.96437
Cbs	-0.52172	366	1361	9434	4	-0.12302	-0.60084	0.36515	0.80094	0.54795	0.99964	0.3987	1.9573	0.14023	0.61799	0.050314	0.96437
Cbwd1	-0.04156	5331	10937	11449	4	-0.43958	-1.754	0.04683	0.4648	0.079437	0.99964	-0.39802	-1.5879	0.076568	0.52041	0.11231	0.96437
Cbx1	-0.17481	3147	10215	11431	4	-0.42517	-1.5795	0.050931	0.48103	0.11423	0.99964	-0.25036	-0.93121	0.16852	0.65428	0.35175	0.96437
Cbx2	-0.03594	5444	9968	10723	4	-0.25701	-1.0534	0.14305	0.61353	0.29217	0.99964	-0.22107	-0.9048	0.19894	0.67553	0.36557	0.96437
Cbx3	0.13487	8237	6788	3892	4	0.1722	0.51303	0.52316	0.87771	0.60793	0.99964	0.03733	0.11083	0.77517	0.95144	0.91175	0.99413
Cbx4	0.171829	8703	9099	6498	4	0.043889	0.16462	0.94539	0.98812	0.86924	0.99964	-0.12794	-0.47704	0.33823	0.77385	0.63334	0.97075
Cbx5	0.18756	8913	7875	4207	4	0.15522	0.56042	0.58511	0.90306	0.57519	0.99964	-0.03234	-0.11604	0.55691	0.87513	0.90762	0.99413
Cbx8	-0.169929	3206	2897	5306	4	0.099961	0.52301	0.81123	0.96425	0.60097	0.99964	0.26989	1.412	0.41096	0.80892	0.15795	0.96437
Cby1	-0.21066	2604	1792	4439	4	0.14248	0.55194	0.63271	0.91921	0.58099	0.99964	0.35314	1.3736	0.21219	0.68798	0.16956	0.96437
Cc2d1a	-0.0101765	5897	7521	7766	4	-0.019221	-0.093033	0.6974	0.93891	0.92588	0.99964	-0.0090445	-0.043723	0.6263	0.90187	0.96513	0.99685
Cc2d1b	0.48419	10984	10706	4379	4	0.14582	0.79954	0.62177	0.91581	0.42398	0.99964	-0.33837	-1.8369	0.10408	0.56207	0.066224	0.96437
Cc2d2a	-0.04463	5260	3487	3630	4	0.18676	0.79271	0.46881	0.85112	0.42795	0.99964	0.23139	0.98075	0.53179	0.86901	0.32672	0.96437
Ccar1	-0.517793	376	617	7363	4	0.0016173	0.0050737	0.77269	0.95563	0.99595	0.99964	0.51941	1.6395	0.035464	0.41762	0.10111	0.96437
Ccar2	0.32016	10135	11038	9160	4	-0.10197	-0.48322	0.42206	0.83064	0.62894	0.99964	-0.42213	-1.9842	0.067424	0.50932	0.047235	0.96437
Ccbe1	0.1871	8907	5016	1644	4	0.32589	1.338	0.13041	0.60339	0.18091	0.99964	0.13879	0.56758	0.8643	0.97833	0.57032	0.96642
Ccdc102a	0.156583	8509	8313	5432	4	0.094179	0.29017	0.83533	0.97043	0.77169	0.99964	-0.062404	-0.19148	0.47949	0.8449	0.84815	0.98717
Ccdc103	-0.308094	1471	1924	6693	4	0.034356	0.16942	0.90489	0.97992	0.86546	0.99964	0.34245	1.6924	0.23381	0.70501	0.090579	0.96437
Ccdc106	0.176441	8757	7127	3535	4	0.19253	0.45234	0.4489	0.8425	0.65103	0.99964	0.016089	0.037651	0.70219	0.92711	0.96997	0.99748
Ccdc107	-0.0087	5933	2470	2017	4	0.29156	1.2503	0.18621	0.6689	0.21119	0.99964	0.30026	1.2851	0.32917	0.76718	0.19875	0.96437
Ccdc112	0.02842	6585	4083	2984	4	0.22278	0.99208	0.35165	0.7964	0.32116	0.99964	0.19436	0.8628	0.6551	0.91013	0.38824	0.96437
Ccdc114	0.03298	6660	4828	3693	4	0.18318	0.75188	0.47983	0.85577	0.45212	0.99964	0.1502	0.61586	0.82191	0.96604	0.53799	0.96642
Ccdc115	0.08706	7522	3098	1459	4	0.3431	1.0056	0.10767	0.57453	0.31462	0.99964	0.25604	0.74614	0.45266	0.83145	0.45558	0.96642
Ccdc116	0.006199	6197	6662	6340	4	0.052002	0.22232	0.98163	0.99679	0.82407	0.99964	0.045803	0.19538	0.80542	0.96223	0.8451	0.98699
Ccdc117	0.120444	8051	8978	7326	4	0.0035038	0.011867	0.78029	0.95705	0.99053	0.99964	-0.11694	-0.39508	0.35772	0.7839	0.69278	0.9733
Ccdc12	-0.10408	4241	5537	7270	4	0.0057298	0.019355	0.79089	0.96056	0.98456	0.99964	0.10981	0.37158	0.96958	0.99588	0.7102	0.97403
Ccdc120	0.112463	7935	8424	6564	4	0.040934	0.20789	0.93343	0.9856	0.83531	0.99964	-0.071529	-0.36177	0.45488	0.83195	0.71753	0.97435
Ccdc122	0.445991	10850	10908	6265	4	0.055381	0.30688	0.9959	0.99889	0.75894	0.99964	-0.39061	-2.1415	0.079388	0.52189	0.032234	0.96437
Ccdc124	-0.526615	355	519	6991	4	0.020445	0.062045	0.84891	0.97082	0.95053	0.99964	0.54706	1.6684	0.024868	0.41119	0.09524	0.96437
Ccdc126	0.144086	8349	6292	3162	4	0.21263	1.238	0.38429	0.81288	0.21572	0.99964	0.068544	0.39791	0.88113	0.98051	0.6907	0.9733
Ccdc127	-0.140666	3680	5038	7452	4	-0.0031064	-0.013916	0.755	0.94994	0.9889	0.99964	0.13756	0.61711	0.86848	0.97863	0.53716	0.96642
Ccdc130	0.08265	7460	176	85	4	0.78823	0.94834	0.00017091	0.022727	0.34295	0.99964	0.70558	0.84498	0.0029055	0.16585	0.39812	0.96437
Ccdc134	0.21914	9253	4117	969	4	0.4111	1.7907	0.051273	0.4827	0.073347	0.99964	0.19196	0.83233	0.66467	0.91484	0.40522	0.96437
Ccdc136	0.00711	6214	2997	2293	4	0.27059	1.2759	0.23116	0.71125	0.20198	0.99964	0.26348	1.2406	0.42967	0.81787	0.21475	0.96437
Ccdc137	-0.0032	6025	10004	10522	4	-0.22798	-0.72872	0.17706	0.66014	0.46617	0.99964	-0.22478	-0.71744	0.19501	0.67414	0.4731	0.96642
Ccdc138	-0.052795	5122	5810	6512	4	0.043246	0.17393	0.94223	0.9864	0.86192	0.99964	0.096041	0.38647	0.98	0.99748	0.69915	0.9733
Ccdc14	-0.09527	4383	2542	3414	4	0.19954	0.70979	0.42429	0.83283	0.47784	0.99964	0.29481	1.048	0.34353	0.77576	0.29463	0.96437
Ccdc141	0.08066	7427	2955	1426	4	0.34626	1.3095	0.10408	0.57318	0.19036	0.99964	0.2656	1.0016	0.42249	0.81369	0.31653	0.96437
Ccdc142	-0.17243	3177	2427	4697	4	0.13013	0.74506	0.68373	0.93295	0.45623	0.99964	0.30256	1.7339	0.32294	0.76367	0.082928	0.96437
Ccdc146	0.00955	6258	9576	9936	4	-0.16532	-0.79537	0.27594	0.74584	0.4264	0.99964	-0.17487	-0.84012	0.25919	0.7218	0.40084	0.96437
Ccdc15	-0.104447	4237	8741	10304	4	-0.20061	-0.97908	0.21355	0.69668	0.32754	0.99964	-0.096163	-0.46904	0.39993	0.80772	0.63904	0.97075
Ccdc150	-0.091634	4452	8176	9701	4	-0.14437	-0.5	0.31952	0.77508	0.61707	0.99964	-0.052736	-0.18305	0.50632	0.8604	0.85476	0.98883
Ccdc152	0.002703	6138	8408	8617	4	-0.067857	-0.2833	0.52453	0.87924	0.77695	0.99964	-0.07056	-0.29396	0.45676	0.83349	0.76879	0.98045
Ccdc157	0.035911	6717	6505	5489	4	0.091864	0.30782	0.84473	0.97075	0.75822	0.99964	0.055953	0.18722	0.83909	0.97311	0.85148	0.988
Ccdc159	-0.131959	3811	4755	6946	4	0.022451	0.094265	0.85729	0.9721	0.9249	0.99964	0.15441	0.64828	0.80567	0.96234	0.5168	0.96642
Ccdc163	-0.41228	757	2799	9612	4	-0.13667	-0.42767	0.3343	0.78466	0.66889	0.99964	0.27561	0.86776	0.39335	0.80436	0.38552	0.96437
Ccdc167	0.11362	7950	5232	2716	4	0.24097	1.1446	0.302	0.76443	0.25235	0.99964	0.12735	0.60293	0.90335	0.98246	0.54656	0.96642
Ccdc17	0.21008	9156	5367	1602	4	0.32966	1.015	0.12553	0.59813	0.3101	0.99964	0.11958	0.3657	0.93223	0.98725	0.71459	0.97403
Ccdc171	0.10541	7831	2754	1127	4	0.38449	1.1782	0.069903	0.51705	0.2387	0.99964	0.27908	0.85261	0.38378	0.79925	0.39388	0.96437
Ccdc173	0.45889	10889	8903	1403	4	0.34933	1.2708	0.10186	0.57006	0.20381	0.99964	-0.10956	-0.39474	0.3725	0.79269	0.69303	0.9733
Ccdc174	0.85832	11574	11279	1636	4	0.32653	0.73645	0.12972	0.6027	0.46146	0.99964	-0.53179	-1.1699	0.040079	0.42909	0.24204	0.96437
Ccdc18	-0.12222	3959	2888	4340	4	0.14815	0.48357	0.61272	0.91219	0.62869	0.99964	0.27037	0.88323	0.40933	0.80844	0.37711	0.96437
Ccdc180	-0.409245	775	7587	11425	4	-0.42293	-1.9809	0.05153	0.48356	0.047605	0.99964	-0.013685	-0.06447	0.6116	0.89709	0.9486	0.9959
Ccdc181	0.07195	7282	5837	4000	4	0.166	0.55357	0.54623	0.88742	0.57988	0.99964	0.09405	0.31276	0.97334	0.99624	0.75446	0.97894
Ccdc186	0.38355	10531	11466	10894	4	-0.28561	-1.0141	0.11844	0.59033	0.31055	0.99964	-0.66916	-2.3471	0.027431	0.41119	0.018919	0.96437
Ccdc189	-0.4272	691	2932	9882	4	-0.15994	-0.78847	0.28653	0.75723	0.43042	0.99964	0.26726	1.3219	0.41856	0.81267	0.18621	0.96437
Ccdc191	0.0343	6688	1913	1171	4	0.37791	1.6518	0.075201	0.52821	0.098573	0.99964	0.34361	1.499	0.23167	0.70288	0.13388	0.96437
Ccdc22	0.832217	11561	11612	8786	4	-0.077873	-0.18774	0.49111	0.86216	0.85108	0.99964	-0.91009	-2.1392	0.017604	0.39411	0.03242	0.96437
Ccdc28a	0.127717	8155	8078	5701	4	0.081913	0.32306	0.88908	0.97813	0.74665	0.99964	-0.045804	-0.17987	0.52444	0.86678	0.85725	0.98883
Ccdc28b	-0.14529	3606	1908	3426	4	0.19853	0.6548	0.42822	0.83441	0.51259	0.99964	0.34382	1.1342	0.23133	0.70288	0.25673	0.96437
Ccdc30	0.22218	9280	10857	9805	4	-0.15332	-0.65067	0.30055	0.76443	0.51526	0.99964	-0.3755	-1.583	0.086054	0.53594	0.11342	0.96437
Ccdc32	-0.014248	5823	8562	9092	4	-0.096796	-0.41817	0.43531	0.83582	0.67582	0.99964	-0.082548	-0.35629	0.42882	0.81781	0.72162	0.97435
Ccdc34	-0.0466655	5229	7237	8093	4	-0.037172	-0.16146	0.63109	0.91881	0.87173	0.99964	0.0094935	0.041198	0.6792	0.91906	0.96714	0.99695
Ccdc38	-0.17229	3180	749	1727	4	0.31838	1.2837	0.14211	0.61353	0.19926	0.99964	0.49067	1.9794	0.050761	0.46939	0.047771	0.96437
Ccdc39	-0.15842	3415	1327	2639	4	0.24542	0.73702	0.29098	0.76089	0.46111	0.99964	0.40384	1.214	0.1328	0.60567	0.22473	0.96437
Ccdc40	0.0047	6166	4791	4176	4	0.15693	0.36759	0.57905	0.90106	0.71318	0.99964	0.15223	0.35623	0.81337	0.96463	0.72167	0.97435
Ccdc43	-0.17178	3184	6945	9708	4	-0.14487	-0.65604	0.31832	0.77362	0.5118	0.99964	0.02691	0.12181	0.73928	0.93808	0.90305	0.99413
Ccdc47	-0.057782	5017	5144	5880	4	0.073978	0.27599	0.91967	0.98141	0.78255	0.99964	0.13176	0.49072	0.88822	0.98102	0.62362	0.97075
Ccdc50	-0.175095	3137	5294	8362	4	-0.051255	-0.19246	0.57862	0.90106	0.84738	0.99964	0.12384	0.46536	0.91634	0.98503	0.64168	0.97182
Ccdc51	0.127188	8145	7141	4440	4	0.14247	0.47173	0.63271	0.91921	0.63712	0.99964	0.015282	0.050413	0.70014	0.92711	0.95979	0.99671
Ccdc57	0.16158	8566	11094	10860	4	-0.27959	-1.1898	0.12288	0.5952	0.23411	0.99964	-0.44117	-1.8664	0.061015	0.49275	0.061983	0.96437
Ccdc58	0.06729	7214	8025	6893	4	0.024799	0.11892	0.86635	0.97379	0.90534	0.99964	-0.042491	-0.20319	0.53239	0.86938	0.83899	0.98621
Ccdc59	0.0592873	7083	7446	6264	4	0.055409	0.14965	0.99607	0.99889	0.88104	0.99964	-0.0038783	-0.010433	0.64117	0.90627	0.99168	0.99868
Ccdc6	-0.30186	1529	76	376	4	0.54213	1.1945	0.0088019	0.27034	0.23228	0.99964	0.84399	1.8649	0.00025637	0.036585	0.062201	0.96437
Ccdc61	0.01801	6406	9684	9970	4	-0.16818	-0.64167	0.27004	0.74254	0.52109	0.99964	-0.18619	-0.71019	0.24389	0.71339	0.47759	0.96642
Ccdc62	-0.404386	802	2325	9048	4	-0.094646	-0.26563	0.4401	0.83713	0.79052	0.99964	0.30974	0.88027	0.30379	0.75137	0.37871	0.96437
Ccdc63	0.02201	6458	2514	1725	4	0.31876	0.93147	0.14169	0.61353	0.35161	0.99964	0.29675	0.86486	0.33926	0.77404	0.38712	0.96437
Ccdc65	0.01272	6317	5676	5002	4	0.11592	0.43198	0.74389	0.94646	0.66576	0.99964	0.1032	0.38377	0.99342	0.99785	0.70115	0.9733
Ccdc66	-0.317706	1388	1266	5430	4	0.094254	0.4307	0.83524	0.97043	0.66669	0.99964	0.41196	1.8854	0.12109	0.58748	0.059375	0.96437
Ccdc69	-0.34912	1153	823	4766	4	0.12669	0.44775	0.70048	0.94024	0.65433	0.99964	0.47581	1.69	0.059562	0.49275	0.091026	0.96437
Ccdc71	0.203778	9084	6428	2383	4	0.2647	1.2314	0.24517	0.72281	0.21819	0.99964	0.060922	0.28228	0.85549	0.9764	0.77773	0.98203
Ccdc71l	0.17234	8716	9610	7516	4	-0.0061798	-0.031129	0.74252	0.94631	0.97517	0.99964	-0.17852	-0.89557	0.25508	0.71917	0.37048	0.96437
Ccdc73	0.096982	7687	8144	6449	4	0.046524	0.20668	0.95813	0.99204	0.83626	0.99964	-0.050458	-0.22344	0.51307	0.86436	0.82319	0.98591
Ccdc74a	0.35547	10365	10197	5168	4	0.10716	0.56706	0.78192	0.95753	0.57067	0.99964	-0.24831	-1.3036	0.17168	0.65839	0.19237	0.96437
Ccdc77	0.066423	7200	8690	7891	4	-0.026182	-0.16046	0.66971	0.92988	0.87252	0.99964	-0.092605	-0.56586	0.406	0.80828	0.57149	0.96642
Ccdc80	-0.390382	887	1169	6647	4	0.036658	0.12452	0.91318	0.97992	0.9009	0.99964	0.42704	1.4584	0.10374	0.561	0.14472	0.96437
Ccdc82	-0.07347	4738	4357	5218	4	0.10451	0.55258	0.79363	0.96103	0.58055	0.99964	0.17798	0.93994	0.71748	0.93085	0.34725	0.96437
Ccdc84	0.19615	9003	3570	889	4	0.42208	1.0629	0.043924	0.45697	0.28781	0.99964	0.22593	0.56557	0.54974	0.8731	0.57169	0.96642
Ccdc85b	-0.1037	4246	1496	2174	4	0.27947	0.63757	0.21108	0.69519	0.52376	0.99964	0.38317	0.87357	0.16322	0.64868	0.38235	0.96437
Ccdc85c	-0.07736	4684	9094	10339	4	-0.20477	-0.83524	0.20714	0.68881	0.40358	0.99964	-0.12741	-0.5202	0.33951	0.77404	0.60292	0.97075
Ccdc86	0.13863	8281	4520	1843	4	0.30742	0.92628	0.15997	0.63978	0.3543	0.99964	0.16879	0.50516	0.75338	0.9438	0.61344	0.97075
Ccdc88a	-0.233668	2323	3393	7335	4	0.0031719	0.016227	0.77867	0.95705	0.98705	0.99964	0.23684	1.2142	0.51436	0.86436	0.22467	0.96437
Ccdc88b	-0.288793	1656	3198	8131	4	-0.039143	-0.24239	0.62348	0.91581	0.80848	0.99964	0.24965	1.5494	0.47154	0.84159	0.12129	0.96437
Ccdc88c	0.03228	6650	4230	3092	4	0.21702	0.66142	0.37036	0.80483	0.50835	0.99964	0.18474	0.56261	0.6933	0.92566	0.5737	0.96759
Ccdc9	0.143221	8340	8453	5983	4	0.069114	0.32707	0.94198	0.9864	0.74362	0.99964	-0.074107	-0.34925	0.44821	0.82854	0.7269	0.97435
Ccdc90b	-0.37324	983	3301	9535	4	-0.13062	-0.45469	0.34883	0.79359	0.64933	0.99964	0.24262	0.84845	0.49419	0.85547	0.39619	0.96437
Ccdc91	0.107231	7855	6119	3644	4	0.18606	0.67963	0.47137	0.85321	0.49674	0.99964	0.078829	0.28678	0.9142	0.98463	0.77428	0.98203
Ccdc92	-0.05222	5130	3202	3452	4	0.19738	0.52486	0.43155	0.83554	0.59968	0.99964	0.2496	0.66466	0.47163	0.84159	0.50627	0.96642
Ccdc93	0.186335	8895	7482	3757	4	0.18001	0.66007	0.49265	0.86289	0.50921	0.99964	-0.0063251	-0.02303	0.63305	0.90375	0.98163	0.99847
Ccdc96	-0.07508	4715	3904	4726	4	0.12881	0.57831	0.68937	0.9348	0.56306	0.99964	0.20389	0.9167	0.62152	0.90158	0.3593	0.96437
Ccdc97	-0.24885	2142	1114	3687	4	0.1834	0.67688	0.47872	0.85529	0.49848	0.99964	0.43225	1.6013	0.098445	0.55722	0.1093	0.96437
Ccdc9b	-0.167612	3247	4014	6783	4	0.030448	0.13785	0.8878	0.97813	0.89036	0.99964	0.19806	0.89687	0.64015	0.90627	0.36979	0.96437
Cchcr1	0.036956	6741	5865	4712	4	0.12942	0.41246	0.68681	0.93422	0.68	0.99964	0.092464	0.29374	0.96787	0.99588	0.76896	0.98045
Ccl2	-0.255467	2057	4324	8751	4	-0.075587	-0.30657	0.49744	0.86545	0.75917	0.99964	0.17988	0.73273	0.71073	0.9289	0.46372	0.96642
Ccl22	-0.1656	3287	1475	3048	4	0.21953	0.7733	0.36267	0.80045	0.43934	0.99964	0.38513	1.3586	0.16091	0.64854	0.17427	0.96437
Ccl24	-0.06691	4846	3607	4169	4	0.15717	0.72662	0.57785	0.90106	0.46746	0.99964	0.22408	1.0363	0.55597	0.87513	0.30005	0.96437
Ccl25	-0.105618	4222	5248	6975	4	0.020942	0.079168	0.85071	0.97089	0.9369	0.99964	0.12656	0.47887	0.90737	0.98343	0.63203	0.97075
Ccl27a	-0.03427	5476	10093	10801	4	-0.26958	-1.2387	0.1328	0.60398	0.21546	0.99964	-0.23531	-1.0808	0.18399	0.66677	0.2798	0.96437
Ccl28	-0.03284	5505	4943	5101	4	0.11068	0.42121	0.76816	0.9548	0.6736	0.99964	0.14352	0.54529	0.84806	0.97466	0.58555	0.96993
Ccl3	0.12058	8053	10247	9582	4	-0.13451	-0.67355	0.33926	0.78612	0.5006	0.99964	-0.25509	-1.2711	0.16442	0.64923	0.2037	0.96437
Ccl4	0.09721	7691	10687	10596	4	-0.23748	-1.0074	0.16416	0.64593	0.31374	0.99964	-0.33469	-1.4132	0.10562	0.56375	0.15761	0.96437
Ccl5	-0.331542	1280	2057	7399	4	-0.00036205	-0.0015097	0.76602	0.95405	0.9988	0.99964	0.33118	1.3915	0.25534	0.71917	0.16408	0.96437
Ccl6	-0.128194	3873	6334	8516	4	-0.062109	-0.30038	0.5423	0.88545	0.76389	0.99964	0.066085	0.31953	0.87276	0.97957	0.74933	0.97751
Ccl7	0.03255	6651	4061	2910	4	0.22818	1.2599	0.33635	0.78536	0.2077	0.99964	0.19563	1.0775	0.64938	0.90742	0.28126	0.96437
Ccl8	-0.329259	1299	2174	7548	4	-0.0080994	-0.034071	0.7356	0.94523	0.97282	0.99964	0.32116	1.355	0.2773	0.73339	0.17541	0.96437
Ccl9	-0.02722	5598	9380	10119	4	-0.18224	-0.91823	0.24372	0.72111	0.3585	0.99964	-0.15502	-0.78132	0.29063	0.74415	0.43461	0.96642
Ccm2	0.40255	10631	4031	253	4	0.59981	1.6675	0.0038455	0.17308	0.095411	0.99964	0.19726	0.54325	0.64297	0.90658	0.58696	0.96993
Ccn1	0.131916	8199	5868	2966	4	0.22417	0.71749	0.34738	0.79325	0.47307	0.99964	0.092254	0.29351	0.96684	0.99588	0.76913	0.98045
Ccn3	0.060692	7099	8808	8160	4	-0.040408	-0.18829	0.6187	0.91581	0.85065	0.99964	-0.1011	-0.47009	0.3884	0.80191	0.63829	0.97075
Ccna2	0.2015	9049	11143	10719	4	-0.2568	-0.50355	0.14322	0.61353	0.61458	0.99964	-0.4583	-0.89071	0.056572	0.48569	0.37308	0.96437
Ccnb1	0.00595	6190	57	40	4	0.89914	1.3404	8.5455e-05	0.016129	0.18011	0.99964	0.89319	1.3273	0	0	0.18441	0.96437
Ccnb2	0.148	8396	2577	807	4	0.4403	1.3165	0.035379	0.41888	0.18801	0.99964	0.2923	0.86988	0.34977	0.77947	0.38437	0.96437
Ccnc	0.09558	7671	4836	2640	4	0.24538	0.52654	0.29106	0.76095	0.59851	0.99964	0.1498	0.31986	0.82345	0.96604	0.74907	0.97751
Ccnd1	-0.0534402	5104	7396	8412	4	-0.054838	-0.15718	0.56742	0.89678	0.8751	0.99964	-0.0013978	-0.0039936	0.64758	0.90658	0.99681	0.9992
Ccnd2	0.188979	8924	10413	9051	4	-0.094741	-0.4159	0.43984	0.83705	0.67748	0.99964	-0.28372	-1.2364	0.13972	0.61721	0.2163	0.96437
Ccnd3	0.415064	10697	8335	1378	4	0.35097	0.83582	0.1005	0.57006	0.40326	0.99964	-0.064094	-0.151	0.47436	0.84316	0.87997	0.99169
Ccndbp1	-0.096934	4351	4694	6134	4	0.061396	0.23818	0.9765	0.99547	0.81174	0.99964	0.15833	0.61432	0.79183	0.95832	0.539	0.96642
Ccne1	0.52285	11093	10779	3991	4	0.16652	0.49075	0.54521	0.88685	0.6236	0.99964	-0.35633	-1.0346	0.09571	0.55353	0.30086	0.96437
Ccne2	0.0997633	7743	7234	5120	4	0.10949	0.49733	0.77294	0.95563	0.61896	0.99964	0.0097267	0.044041	0.67971	0.91911	0.96487	0.99685
Ccnf	-0.09937	4311	2407	3326	4	0.20415	0.82418	0.40976	0.82539	0.40984	0.99964	0.30352	1.228	0.3202	0.76314	0.21946	0.96437
Ccng1	-0.193524	2854	3222	6283	4	0.054586	0.2701	0.99257	0.9988	0.78708	0.99964	0.24811	1.2286	0.47539	0.84316	0.2192	0.96437
Ccng2	-0.122257	3957	7605	9616	4	-0.13698	-0.59547	0.3337	0.78445	0.55153	0.99964	-0.014723	-0.063969	0.60938	0.89709	0.94899	0.9959
Ccnh	0.1768	8763	6	2	4	1.3948	1.079	0	0	0.2806	0.99964	1.218	0.93473	0	0	0.34993	0.96437
Ccni	0.44193	10834	10007	3091	4	0.21703	0.96172	0.37036	0.80483	0.33619	0.99964	-0.2249	-0.98539	0.19492	0.67414	0.32443	0.96437
Ccnj	-0.13491	3754	2952	4682	4	0.13082	0.32996	0.68082	0.93203	0.74143	0.99964	0.26573	0.67057	0.42206	0.81369	0.50249	0.96642
Ccnk	-0.383868	910	2519	8933	4	-0.087558	-0.31663	0.46206	0.84816	0.75152	0.99964	0.29631	1.0795	0.34011	0.77404	0.28036	0.96437
Ccnl1	-0.22136	2476	6836	10165	4	-0.1869	-1.1695	0.23569	0.71395	0.24218	0.99964	0.03446	0.21616	0.76534	0.94823	0.82887	0.98591
Ccnl2	0.344341	10291	8582	2446	4	0.25941	0.93256	0.25714	0.73034	0.35105	0.99964	-0.084931	-0.30315	0.42318	0.81434	0.76178	0.97921
Ccno	-0.049595	5181	6946	7829	4	-0.022833	-0.10885	0.68228	0.93283	0.91332	0.99964	0.026762	0.12746	0.73902	0.93786	0.89858	0.99373
Ccnq	0.24933	9571	4830	1033	4	0.39927	0.48203	0.058537	0.49602	0.62979	0.99964	0.14994	0.17904	0.82302	0.96604	0.85791	0.98883
Ccnt1	0.441854	10832	11106	7482	4	-0.0044363	-0.014606	0.74936	0.94841	0.98835	0.99964	-0.44629	-1.4467	0.05999	0.49275	0.14797	0.96437
Ccnt2	0.104207	7807	9186	7995	4	-0.032163	-0.13835	0.64869	0.92314	0.88997	0.99964	-0.13637	-0.58484	0.32268	0.76367	0.55865	0.96642
Ccny	0.10212	7778	7138	4954	4	0.11746	0.52277	0.73688	0.94523	0.60113	0.99964	0.01534	0.068074	0.70031	0.92711	0.94573	0.99571
Ccnyl1	-0.264118	1934	8320	11103	4	-0.32689	-1.5371	0.090497	0.55695	0.12427	0.99964	-0.062772	-0.29649	0.47804	0.84371	0.76685	0.98045
Ccp110	0.635335	11339	11374	6635	4	0.037025	0.1234	0.91454	0.98013	0.90179	0.99964	-0.59831	-1.9555	0.032644	0.41738	0.05052	0.96437
Ccpg1	0.459181	10893	6803	554	4	0.49554	1.7638	0.016237	0.32929	0.077758	0.99964	0.036359	0.12827	0.772	0.95069	0.89793	0.99373
Ccpg1os	-0.00316	6028	1021	799	4	0.44323	0.93232	0.03384	0.41079	0.35117	0.99964	0.44639	0.93694	0.084943	0.53498	0.34879	0.96437
Ccr1	0.166923	8632	8695	5883	4	0.073935	0.37778	0.92001	0.98141	0.70559	0.99964	-0.092988	-0.47296	0.40566	0.80828	0.63624	0.97075
Ccr10	0.03618	6724	4437	3216	4	0.20983	1.0249	0.39335	0.82021	0.30542	0.99964	0.17365	0.84656	0.73329	0.93567	0.39724	0.96437
Ccr5	-0.044904	5256	8339	9253	4	-0.10908	-0.35692	0.40403	0.82255	0.72115	0.99964	-0.064176	-0.20955	0.47385	0.84299	0.83402	0.98591
Ccrl2	0.03901	6780	2295	1379	4	0.35085	1.6221	0.10058	0.57006	0.10477	0.99964	0.31184	1.4388	0.29944	0.74925	0.15019	0.96437
Ccs	-0.15458	3480	2015	3753	4	0.18023	0.61535	0.49163	0.86225	0.53832	0.99964	0.33481	1.1433	0.24825	0.71411	0.25292	0.96437
Ccsap	-0.190552	2907	4247	7524	4	-0.0064824	-0.024709	0.74133	0.94612	0.98029	0.99964	0.18407	0.70346	0.69569	0.92566	0.48177	0.96642
Ccser2	-0.387527	900	1869	8167	4	-0.040777	-0.1227	0.61724	0.91511	0.90234	0.99964	0.34675	1.0504	0.22458	0.69859	0.29352	0.96437
Cct2	-0.39062	885	4034	10239	4	-0.19353	-0.40218	0.22278	0.70307	0.68755	0.99964	0.19709	0.41055	0.64391	0.90658	0.6814	0.9733
Cct3	0.6822	11406	8525	247	4	0.60253	0.85716	0.0038455	0.17308	0.39136	0.99964	-0.07967	-0.1106	0.4348	0.81978	0.91194	0.99413
Cct4	0.21428	9205	263	55	4	0.85648	1.2608	8.5455e-05	0.016129	0.20738	0.99964	0.6422	0.93619	0.0064946	0.25246	0.34917	0.96437
Cct5	-0.4824	477	10896	11685	4	-0.86886	-1.3274	0.016066	0.32929	0.18438	0.99964	-0.38646	-0.5996	0.08161	0.52896	0.54877	0.96642
Cct7	0.40774	10658	144	11	4	1.1381	0.78834	0	0	0.4305	0.99964	0.73036	0.49786	0.0020509	0.14545	0.61858	0.97075
Cct8	0.86243	11577	11650	10202	4	-0.19037	-0.55562	0.22859	0.70716	0.57847	0.99964	-1.0528	-3.0062	0.011536	0.32847	0.0026455	0.79993
Ccz1	0.017318	6396	5752	4990	4	0.11627	0.17322	0.74218	0.94631	0.86248	0.99964	0.098952	0.14683	0.98957	0.99785	0.88326	0.99186
Cd109	-0.018042	5756	6930	7178	4	0.010175	0.046419	0.80918	0.96406	0.96298	0.99964	0.028217	0.1285	0.74398	0.94019	0.89776	0.99373
Cd14	-0.088364	4503	4636	5892	4	0.073526	0.33245	0.92232	0.98199	0.73955	0.99964	0.16189	0.73157	0.77918	0.95297	0.46443	0.96642
Cd151	-0.25308	2086	475	1854	4	0.30668	0.88229	0.16177	0.64322	0.37762	0.99964	0.55976	1.6143	0.020595	0.40641	0.10645	0.96437
Cd160	0.190143	8935	8682	5349	4	0.097782	0.41967	0.82029	0.96755	0.67473	0.99964	-0.092361	-0.39433	0.40685	0.80828	0.69334	0.9733
Cd164	-0.00509	5995	2798	2295	4	0.27053	1.0704	0.23133	0.71125	0.28446	0.99964	0.27562	1.089	0.39335	0.80436	0.27618	0.96437
Cd177	0.060882	7103	8048	7061	4	0.016735	0.067278	0.83652	0.97043	0.94636	0.99964	-0.044147	-0.17707	0.52846	0.86744	0.85945	0.98883
Cd180	-0.147744	3569	7574	9889	4	-0.16064	-0.75109	0.28525	0.75623	0.4526	0.99964	-0.012896	-0.060307	0.61348	0.89795	0.95191	0.9959
Cd1d1	0.23042	9378	10166	7675	4	-0.01446	-0.062559	0.71278	0.94195	0.95012	0.99964	-0.24488	-1.052	0.17535	0.65936	0.29282	0.96437
Cd200r1	0.260002	9658	6216	1548	4	0.33353	1.1346	0.12049	0.59389	0.25656	0.99964	0.073528	0.24819	0.89609	0.98102	0.80398	0.98555
Cd200r2	-0.13033	3841	2912	4530	4	0.13816	0.5919	0.65117	0.92352	0.55392	0.99964	0.26849	1.1513	0.41497	0.81201	0.24961	0.96437
Cd200r3	-0.248442	2144	3017	7126	4	0.013628	0.042537	0.82242	0.9685	0.96607	0.99964	0.26207	0.82047	0.43411	0.81978	0.41195	0.96642
Cd200r4	0.433175	10782	8526	1350	4	0.3535	1.2779	0.096992	0.56914	0.20127	0.99964	-0.079675	-0.28524	0.4348	0.81978	0.77546	0.98203
Cd207	-0.03075	5548	2306	2160	4	0.28032	0.93446	0.20962	0.6942	0.35007	0.99964	0.31107	1.0341	0.30097	0.74968	0.30111	0.96437
Cd209c	0.258951	9650	7263	2345	4	0.26715	1.1343	0.24022	0.71911	0.25669	0.99964	0.0081994	0.034609	0.67518	0.91819	0.97239	0.99752
Cd244a	0.14801	8397	10560	9905	4	-0.16304	-0.78092	0.28064	0.75011	0.43485	0.99964	-0.31105	-1.4832	0.12083	0.58697	0.13802	0.96437
Cd247	-0.097744	4339	4257	5612	4	0.085776	0.2849	0.87053	0.97521	0.77572	0.99964	0.18352	0.61106	0.69723	0.92569	0.54116	0.96642
Cd274	-1.34968	9	170	11637	4	-0.64088	-1.4926	0.024098	0.376	0.13555	0.99964	0.7088	1.6867	0.00282	0.16585	0.091669	0.96437
Cd276	0.04826	6906	2513	1437	4	0.34502	1.026	0.10537	0.57453	0.30491	0.99964	0.29676	0.88138	0.33926	0.77404	0.37811	0.96437
Cd28	0.01146	6291	4572	3798	4	0.17738	0.74838	0.50179	0.86804	0.45423	0.99964	0.16592	0.69795	0.76389	0.94783	0.48521	0.96642
Cd2ap	-0.45849	567	374	4589	4	0.13532	0.32332	0.66322	0.9268	0.74645	0.99964	0.59381	1.4374	0.013417	0.35666	0.15059	0.96437
Cd2bp2	-0.53344	339	5236	11380	4	-0.40633	-0.98745	0.055973	0.49027	0.32342	0.99964	0.12711	0.31282	0.90446	0.98246	0.75442	0.97894
Cd300a	0.28454	9863	9300	4554	4	0.1371	0.66216	0.65587	0.92472	0.50787	0.99964	-0.14744	-0.70774	0.30285	0.75101	0.47911	0.96642
Cd300c2	0.39607	10597	11260	9463	4	-0.12471	-0.54125	0.36139	0.80034	0.58834	0.99964	-0.52078	-2.2357	0.041959	0.438	0.025371	0.96437
Cd300e	0.04429	6854	3740	2445	4	0.25943	1.1624	0.25714	0.73034	0.24507	0.99964	0.21514	0.96215	0.584	0.88592	0.33597	0.96437
Cd300lb	0.152178	8461	8488	5841	4	0.075715	0.30382	0.91275	0.97992	0.76127	0.99964	-0.076463	-0.30569	0.4424	0.82531	0.75984	0.97906
Cd300ld	0.06313	7143	11244	11462	4	-0.44664	-2.2806	0.04495	0.45939	0.02257	0.99964	-0.50977	-2.5954	0.04401	0.44783	0.0094485	0.96437
Cd300ld3	0.333601	10227	8299	2272	4	0.27206	1.1564	0.22765	0.70716	0.24753	0.99964	-0.061541	-0.25951	0.48103	0.84503	0.79524	0.9851
Cd300lf	0.00113	6113	2501	1941	4	0.29868	1.1858	0.17535	0.66014	0.23571	0.99964	0.29755	1.1797	0.33695	0.77342	0.23812	0.96437
Cd300lg	-0.06129	4953	10628	11311	4	-0.38547	-1.6015	0.062981	0.50204	0.10926	0.99964	-0.32418	-1.3467	0.11212	0.57243	0.17807	0.96437
Cd302	-0.18209	3023	5548	8698	4	-0.07262	-0.38342	0.50786	0.87039	0.70141	0.99964	0.10947	0.5784	0.97018	0.99588	0.56299	0.96642
Cd320	0.127241	8146	6548	3752	4	0.18025	0.88758	0.49163	0.86225	0.37477	0.99964	0.053009	0.26007	0.82883	0.96864	0.79481	0.98507
Cd33	0.0503249	6948	7238	6175	4	0.059814	0.26093	0.98376	0.99706	0.79415	0.99964	0.0094891	0.041325	0.6792	0.91906	0.96704	0.99695
Cd34	0.048121	6901	8700	8252	4	-0.045245	-0.24869	0.60032	0.90802	0.8036	0.99964	-0.093366	-0.51208	0.40489	0.80828	0.6086	0.97075
Cd36	-0.02237	5691	2484	2210	4	0.2765	0.99759	0.21791	0.70043	0.31848	0.99964	0.29887	1.0763	0.33345	0.77104	0.28178	0.96437
Cd37	-0.209633	2617	2597	5727	4	0.080867	0.3876	0.89344	0.97813	0.69831	0.99964	0.2905	1.393	0.35387	0.78117	0.16361	0.96437
Cd38	-0.43012	676	4625	10783	4	-0.26788	-1.0715	0.13434	0.60398	0.28393	0.99964	0.16224	0.65339	0.77756	0.95297	0.5135	0.96642
Cd3eap	-0.168953	3226	5352	8312	4	-0.048333	-0.10035	0.58793	0.90384	0.92007	0.99964	0.12062	0.25116	0.92813	0.98701	0.80169	0.98555
Cd4	0.315041	10100	10561	7323	4	0.0035512	0.017441	0.78081	0.95705	0.98609	0.99964	-0.31149	-1.5195	0.12041	0.58659	0.12864	0.96437
Cd40	-1.49036	7	20	11369	4	-0.40156	-0.68145	0.057255	0.49192	0.49558	0.99964	1.0888	1.8751	0	0	0.060785	0.96437
Cd44	0.23558	9420	9005	5008	4	0.11567	0.49984	0.74534	0.94646	0.61719	0.99964	-0.11991	-0.51431	0.35319	0.78088	0.60704	0.97075
Cd46	-0.232495	2338	8092	10858	4	-0.27932	-1.5869	0.12306	0.59529	0.11254	0.99964	-0.046825	-0.26761	0.52196	0.86678	0.789	0.98494
Cd47	-0.4245	703	2881	9810	4	-0.15378	-0.57124	0.29978	0.76443	0.56784	0.99964	0.27072	1.0117	0.40805	0.80828	0.31168	0.96437
Cd5	-0.251948	2104	3130	7354	4	0.0020823	0.011337	0.77448	0.95611	0.99095	0.99964	0.25403	1.3867	0.45813	0.83349	0.16552	0.96437
Cd52	-0.0161	5793	3171	2804	4	0.23582	0.75289	0.31465	0.77136	0.45151	0.99964	0.25192	0.80228	0.46479	0.83703	0.42239	0.96642
Cd53	0.01152	6292	452	293	4	0.57878	1.6399	0.0057255	0.22559	0.10102	0.99964	0.56726	1.6042	0.018715	0.39818	0.10867	0.96437
Cd59a	-0.02096	5705	9798	10455	4	-0.22005	-0.93924	0.1874	0.6689	0.34761	0.99964	-0.19909	-0.84752	0.22586	0.69884	0.39671	0.96437
Cd63	0.01233	6307	1722	1205	4	0.37221	1.1631	0.080328	0.54456	0.24478	0.99964	0.35988	1.1231	0.20039	0.67612	0.26141	0.96437
Cd68	0.06607	7191	10270	10220	4	-0.19196	-0.95398	0.2268	0.70716	0.3401	0.99964	-0.25803	-1.2791	0.16177	0.64854	0.20086	0.96437
Cd69	0.030341	6616	6230	5242	4	0.10328	0.39766	0.79858	0.96244	0.69088	0.99964	0.072939	0.28025	0.89463	0.98102	0.77929	0.98203
Cd72	-0.35638	1107	799	4804	4	0.12434	0.55143	0.70911	0.94166	0.58134	0.99964	0.48072	2.1382	0.055802	0.48299	0.032503	0.96437
Cd74	-0.177093	3104	8053	10468	4	-0.22167	-1.0853	0.18501	0.66739	0.27777	0.99964	-0.044577	-0.21853	0.52743	0.86698	0.82702	0.98591
Cd80	0.0578412	7061	8205	7322	4	0.0035532	0.015027	0.78081	0.95705	0.98801	0.99964	-0.054288	-0.2289	0.50128	0.85886	0.81895	0.98591
Cd81	0.016819	6384	6613	6037	4	0.066086	0.20194	0.95548	0.99131	0.83996	0.99964	0.049267	0.15101	0.8161	0.96494	0.87997	0.99169
Cd82	0.24678	9540	2874	467	4	0.51775	1.9591	0.012049	0.29622	0.050104	0.99964	0.27097	1.0206	0.40779	0.80828	0.30744	0.96437
Cd83	0.09246	7613	2720	1195	4	0.374	1.4871	0.078704	0.53986	0.13699	0.99964	0.28154	1.1172	0.37729	0.79535	0.2639	0.96437
Cd84	0.359612	10395	11136	9099	4	-0.097098	-0.44753	0.43463	0.83582	0.65449	0.99964	-0.45671	-2.0852	0.057255	0.48621	0.037049	0.96437
Cd86	-0.03035	5553	8855	9600	4	-0.13582	-0.57902	0.33644	0.78536	0.56257	0.99964	-0.10547	-0.44867	0.38045	0.79689	0.65367	0.97206
Cd9	-0.194642	2841	2571	5339	4	0.098238	0.45421	0.81841	0.96679	0.64968	0.99964	0.29288	1.3545	0.34806	0.77833	0.17557	0.96437
Cd93	0.14079	8302	10326	9473	4	-0.12594	-0.63151	0.35891	0.79848	0.52771	0.99964	-0.26673	-1.3301	0.15297	0.63906	0.1835	0.96437
Cd99l2	0.2257	9324	10878	9837	4	-0.15518	-0.65175	0.29602	0.76325	0.51456	0.99964	-0.38088	-1.5935	0.083575	0.53322	0.11105	0.96437
Cda	-0.55663	291	3227	11022	4	-0.30902	-0.99222	0.10126	0.57006	0.32109	0.99964	0.24761	0.80541	0.4765	0.84343	0.42058	0.96642
Cdadc1	0.143013	8335	8138	5460	4	0.092989	0.5037	0.84003	0.97043	0.61447	0.99964	-0.050024	-0.26986	0.5141	0.86436	0.78727	0.98449
Cdan1	0.256666	9626	6273	1628	4	0.32725	0.60777	0.12904	0.6027	0.54334	0.99964	0.070584	0.12971	0.88788	0.98102	0.8968	0.99373
Cdc123	0.5549	11174	3663	92	4	0.77551	1.2829	0.00042728	0.050505	0.19951	0.99964	0.22061	0.35859	0.56777	0.87839	0.7199	0.97435
Cdc14a	-0.119776	3989	4870	6848	4	0.027394	0.1269	0.87566	0.97602	0.89902	0.99964	0.14717	0.6834	0.83362	0.97075	0.49436	0.96642
Cdc14b	0.01397	6342	10296	10664	4	-0.24775	-1.1446	0.15177	0.62535	0.25238	0.99964	-0.26172	-1.2062	0.15835	0.64601	0.22775	0.96437
Cdc16	0.5659	11196	10831	3430	4	0.19838	0.36988	0.42873	0.83441	0.71147	0.99964	-0.36752	-0.67398	0.089557	0.54428	0.50032	0.96642
Cdc20	0.44042	10822	9127	1821	4	0.31011	0.50879	0.1551	0.63108	0.6109	0.99964	-0.13031	-0.20989	0.33328	0.77104	0.83376	0.98591
Cdc23	0.6897	11418	11592	10108	4	-0.18092	-0.54748	0.24577	0.72316	0.58405	0.99964	-0.87062	-2.5846	0.019911	0.40541	0.0097503	0.96437
Cdc25a	0.31354	10089	8910	3341	4	0.20367	0.64968	0.41138	0.82539	0.5159	0.99964	-0.10987	-0.34689	0.37207	0.7925	0.72867	0.97458
Cdc25b	0.0568	7043	10651	10812	4	-0.27169	-1.0755	0.13092	0.60339	0.28214	0.99964	-0.32849	-1.2976	0.10981	0.56871	0.19442	0.96437
Cdc25c	0.49527	11023	8946	1147	4	0.38098	1.6216	0.072039	0.52198	0.1049	0.99964	-0.11429	-0.48135	0.36327	0.7862	0.63027	0.97075
Cdc26	0.32861	10197	4464	530	4	0.50088	1.3127	0.014955	0.32169	0.18927	0.99964	0.17227	0.44624	0.73902	0.93786	0.65542	0.97206
Cdc27	0.201599	9051	8103	4236	4	0.15381	0.41177	0.5905	0.90398	0.68051	0.99964	-0.047789	-0.12701	0.51897	0.86454	0.89893	0.99376
Cdc34	-0.533563	338	907	8658	4	-0.070403	-0.2512	0.51589	0.87466	0.80166	0.99964	0.46316	1.6673	0.070073	0.51151	0.09546	0.96437
Cdc37	0.636278	11340	8066	266	4	0.59113	0.80949	0.0042728	0.18519	0.41824	0.99964	-0.045148	-0.060526	0.52623	0.86678	0.95174	0.9959
Cdc37l1	-0.284007	1711	5743	10141	4	-0.18452	-0.98447	0.23962	0.71861	0.32489	0.99964	0.099487	0.53252	0.99145	0.99785	0.59437	0.97075
Cdc40	0.288666	9916	8464	3149	4	0.21362	0.43177	0.38182	0.81232	0.66591	0.99964	-0.075046	-0.15021	0.44616	0.82689	0.8806	0.99182
Cdc42	0.3617	10408	11329	10293	4	-0.19927	-0.62045	0.21569	0.69975	0.53496	0.99964	-0.56097	-1.7164	0.036404	0.41762	0.086085	0.96437
Cdc42bpa	-0.520657	370	1017	8716	4	-0.073677	-0.28319	0.50419	0.86867	0.77703	0.99964	0.44698	1.7297	0.084857	0.53498	0.08369	0.96437
Cdc42bpb	-0.076573	4695	7805	9207	4	-0.10544	-0.36896	0.4119	0.82563	0.71216	0.99964	-0.028867	-0.10089	0.56751	0.87832	0.91964	0.99432
Cdc42bpg	-0.46539	538	266	3822	4	0.17591	0.53567	0.50718	0.86972	0.59219	0.99964	0.6413	1.9631	0.0065801	0.25246	0.049632	0.96437
Cdc42ep2	0.423819	10747	6897	732	4	0.45441	1.6102	0.02914	0.40206	0.10736	0.99964	0.030591	0.10727	0.75132	0.9438	0.91458	0.99413
Cdc42ep3	-0.16735	3253	1341	2824	4	0.23409	0.80408	0.31977	0.77513	0.42135	0.99964	0.40144	1.3792	0.1369	0.61332	0.16783	0.96437
Cdc42ep4	0.360824	10401	10973	8274	4	-0.046236	-0.18529	0.59597	0.90668	0.853	0.99964	-0.40706	-1.6199	0.073748	0.5181	0.10526	0.96437
Cdc42se1	-0.30041	1540	561	2845	4	0.23268	0.8622	0.32371	0.77828	0.38858	0.99964	0.53309	1.9799	0.029995	0.41558	0.047713	0.96437
Cdc42se2	0.348695	10322	11051	8781	4	-0.077465	-0.27799	0.49197	0.86225	0.78102	0.99964	-0.42616	-1.5132	0.066399	0.50812	0.13023	0.96437
Cdc45	-0.29346	1613	1235	4828	4	0.12315	0.24107	0.7139	0.94218	0.8095	0.99964	0.41661	0.82148	0.1146	0.57603	0.41137	0.96642
Cdc5l	0.13019	8186	135	51	4	0.86627	1.0139	8.5455e-05	0.016129	0.31064	0.99964	0.73608	0.85713	0.0019655	0.14545	0.39137	0.96437
Cdc6	0.403944	10641	8509	1650	4	0.32554	0.99804	0.13135	0.6036	0.31826	0.99964	-0.078404	-0.23764	0.43856	0.82296	0.81216	0.98591
Cdc7	-0.381738	922	8459	11482	4	-0.45636	-1.1259	0.0423	0.45297	0.26019	0.99964	-0.074622	-0.18713	0.44719	0.82774	0.85156	0.988
Cdc73	0.078865	7404	9438	8862	4	-0.082775	-0.14437	0.47539	0.85361	0.88521	0.99964	-0.16164	-0.28047	0.27952	0.73423	0.77912	0.98203
Cdca2	0.437688	10806	11030	7037	4	0.017798	0.083003	0.84063	0.97043	0.93385	0.99964	-0.41989	-1.9347	0.068279	0.51009	0.05303	0.96437
Cdca3	0.455047	10880	6191	418	4	0.52988	1.0964	0.010169	0.27869	0.27288	0.99964	0.074833	0.15261	0.90104	0.9823	0.87871	0.99169
Cdca4	-0.3537	1126	557	3744	4	0.18057	0.62173	0.49	0.86167	0.53412	0.99964	0.53427	1.8445	0.029311	0.41198	0.065105	0.96437
Cdca5	-0.41547	744	4973	10827	4	-0.27399	-0.78522	0.12938	0.6027	0.43233	0.99964	0.14148	0.40738	0.85601	0.9764	0.68373	0.9733
Cdca7	-0.33553	1254	10284	11613	4	-0.59576	-1.9494	0.026235	0.38356	0.051252	0.99964	-0.26023	-0.8602	0.15972	0.6474	0.38968	0.96437
Cdca7l	-0.040308	5361	7766	8583	4	-0.066081	-0.30485	0.53025	0.88098	0.76048	0.99964	-0.025773	-0.11865	0.57674	0.88215	0.90555	0.99413
Cdca8	-0.016731	5779	6138	6141	4	0.061054	0.19378	0.97778	0.99574	0.84635	0.99964	0.077785	0.2468	0.91138	0.98386	0.80507	0.98555
Cdh24	-0.246846	2165	3796	8071	4	-0.035916	-0.16028	0.63545	0.91941	0.87266	0.99964	0.21093	0.94175	0.5975	0.89269	0.34632	0.96437
Cdin1	0.184573	8876	10056	8286	4	-0.046897	-0.12327	0.59246	0.9045	0.9019	0.99964	-0.23147	-0.6033	0.188	0.66869	0.54631	0.96642
Cdip1	0.009298	6255	5987	5410	4	0.094988	0.27765	0.83251	0.97043	0.78128	0.99964	0.08569	0.24992	0.93975	0.98923	0.80265	0.98555
Cdipt	0.28683	9892	4058	614	4	0.48257	1.0202	0.019484	0.35625	0.30764	0.99964	0.19574	0.40916	0.64912	0.90742	0.68242	0.9733
Cdk1	0.74415	11483	10994	1569	4	0.33242	0.39248	0.12169	0.59457	0.6947	0.99964	-0.41173	-0.47173	0.071783	0.51595	0.63712	0.97075
Cdk10	0.56007	11187	11604	11100	4	-0.32655	-1.231	0.090754	0.55695	0.21834	0.99964	-0.88662	-3.2915	0.018971	0.39928	0.00099654	0.5361
Cdk11b	0.096614	7681	9443	8570	4	-0.065496	-0.24599	0.53196	0.88127	0.80569	0.99964	-0.16211	-0.60592	0.27858	0.73407	0.54457	0.96642
Cdk12	-0.233416	2328	7201	10471	4	-0.22191	-0.72609	0.18484	0.66739	0.46778	0.99964	0.011506	0.037755	0.68655	0.92281	0.96988	0.99748
Cdk13	0.231946	9389	9769	6648	4	0.036626	0.12657	0.91292	0.97992	0.89928	0.99964	-0.19532	-0.66893	0.23056	0.70288	0.50354	0.96642
Cdk14	-0.03223	5519	4424	4442	4	0.14241	0.50243	0.63297	0.91921	0.61536	0.99964	0.17464	0.6148	0.72996	0.9344	0.53869	0.96642
Cdk15	-0.09377	4410	3158	4142	4	0.15868	0.66028	0.57153	0.89856	0.50908	0.99964	0.25245	1.0523	0.46334	0.83673	0.29266	0.96437
Cdk16	-0.032843	5504	5476	5723	4	0.080947	0.39382	0.89284	0.97813	0.69371	0.99964	0.11379	0.55309	0.95496	0.9928	0.5802	0.9681
Cdk17	-0.03717	5421	1827	1789	4	0.31324	1.4566	0.14946	0.62087	0.14521	0.99964	0.35041	1.6276	0.21748	0.69252	0.1036	0.96437
Cdk18	-0.060042	4977	5418	6238	4	0.056638	0.22024	0.99915	0.99949	0.82569	0.99964	0.11668	0.45264	0.94317	0.98933	0.65081	0.97206
Cdk19	0.04056	6806	10977	11242	4	-0.36726	-1.2698	0.070415	0.51791	0.20416	0.99964	-0.40782	-1.4054	0.073321	0.5181	0.15992	0.96437
Cdk2	0.45631	10881	9809	2479	4	0.25638	0.92223	0.26363	0.73839	0.35641	0.99964	-0.19993	-0.7107	0.22492	0.69859	0.47727	0.96642
Cdk20	-0.23567	2298	5495	9433	4	-0.12298	-0.48271	0.36541	0.8012	0.6293	0.99964	0.11269	0.444	0.95967	0.99319	0.65704	0.97206
Cdk2ap1	-0.082688	4599	4768	5947	4	0.070842	0.30924	0.93488	0.9856	0.75714	0.99964	0.15353	0.66952	0.80909	0.96337	0.50316	0.96642
Cdk2ap2	0.386559	10551	8174	1544	4	0.33399	1.0513	0.11981	0.59281	0.29314	0.99964	-0.052569	-0.16391	0.50667	0.8604	0.8698	0.99077
Cdk4	0.430716	10770	8613	1451	4	0.34386	1.2798	0.10699	0.57453	0.20062	0.99964	-0.086856	-0.31942	0.41822	0.81267	0.74941	0.97751
Cdk5	0.524097	11096	7517	476	4	0.51512	1.5171	0.012391	0.29835	0.12923	0.99964	-0.0089774	-0.026119	0.62647	0.90187	0.97916	0.99847
Cdk5r1	0.01313	6327	11290	11560	4	-0.52462	-2.2196	0.031533	0.40773	0.026449	0.99964	-0.53775	-2.2767	0.039224	0.4287	0.022801	0.96437
Cdk5rap1	-0.260178	1993	2469	6577	4	0.040192	0.15441	0.92984	0.98497	0.87729	0.99964	0.30037	1.1569	0.329	0.76718	0.24733	0.96437
Cdk5rap2	-0.13602	3740	2766	4447	4	0.14223	0.4829	0.63382	0.91941	0.62917	0.99964	0.27825	0.94549	0.38609	0.80021	0.34441	0.96437
Cdk5rap3	0.04835	6911	2588	1494	4	0.3396	1.1563	0.11178	0.58159	0.24758	0.99964	0.29125	0.9874	0.35208	0.78075	0.32345	0.96437
Cdk6	0.58594	11235	1313	25	4	0.99142	2.0707	0	0	0.038391	0.99964	0.40548	0.83411	0.13075	0.60408	0.40422	0.96437
Cdk7	0.50728	11052	10681	3855	4	0.17386	0.41163	0.51589	0.87466	0.68061	0.99964	-0.33342	-0.77688	0.10673	0.56516	0.43723	0.96642
Cdk8	0.436579	10803	7223	779	4	0.44672	1.9822	0.032729	0.40776	0.047452	0.99964	0.010141	0.044491	0.68185	0.91998	0.96451	0.99685
Cdk9	0.04648	6885	5221	3845	4	0.17451	0.17907	0.51359	0.87342	0.85788	0.99964	0.12803	0.13115	0.9007	0.98229	0.89566	0.9934
Cdkal1	0.112244	7932	8890	7331	4	0.0032543	0.014325	0.77893	0.95705	0.98857	0.99964	-0.10899	-0.47789	0.37387	0.79286	0.63273	0.97075
Cdkl2	0.01518	6361	2645	1897	4	0.30229	1.0694	0.16843	0.65029	0.28488	0.99964	0.28711	1.0137	0.36267	0.7862	0.31071	0.96437
Cdkl3	-0.13416	3771	2963	4675	4	0.13109	0.52671	0.67954	0.93147	0.59839	0.99964	0.26525	1.0655	0.4242	0.81514	0.28666	0.96437
Cdkl4	-0.04643	5235	976	999	4	0.40649	1.283	0.054264	0.48663	0.19949	0.99964	0.45292	1.4284	0.07879	0.52189	0.15317	0.96437
Cdkl5	0.25284	9600	8998	4623	4	0.13337	0.7759	0.67117	0.93057	0.43781	0.99964	-0.11947	-0.69152	0.35379	0.78117	0.48924	0.96642
Cdkn1a	-0.37549	966	10542	11653	4	-0.68286	-3.2721	0.022646	0.37119	0.0010673	0.99964	-0.30737	-1.4761	0.12306	0.59235	0.13992	0.96437
Cdkn1b	-0.00126	6067	10500	10974	4	-0.30061	-1.4778	0.10819	0.57453	0.13945	0.99964	-0.29935	-1.4699	0.12835	0.59912	0.14159	0.96437
Cdkn1c	-0.11339	4099	1005	1530	4	0.33593	0.45066	0.11724	0.58783	0.65223	0.99964	0.44932	0.60358	0.082721	0.53099	0.54612	0.96642
Cdkn2aip	-0.1447	3615	1025	1915	4	0.30134	1.0711	0.17057	0.65186	0.28411	0.99964	0.44604	1.5869	0.085285	0.53566	0.11254	0.96437
Cdkn2aipnl	-0.35491	1120	1413	6655	4	0.03645	0.12446	0.91258	0.97992	0.90095	0.99964	0.39136	1.345	0.15109	0.63679	0.17862	0.96437
Cdkn2b	0.01414	6345	2200	1554	4	0.33305	1.6741	0.121	0.59389	0.09412	0.99964	0.31891	1.6017	0.2826	0.73633	0.10922	0.96437
Cdkn2c	0.11935	8033	2614	981	4	0.40843	1.7561	0.053239	0.48574	0.079074	0.99964	0.28908	1.2387	0.35746	0.78363	0.21546	0.96437
Cdkn2d	0.32055	10140	9889	5099	4	0.11075	0.46819	0.7679	0.95474	0.63965	0.99964	-0.2098	-0.88031	0.2115	0.68663	0.37869	0.96437
Cdkn3	-0.0004	6081	2889	2299	4	0.2699	1.0147	0.23278	0.71201	0.31024	0.99964	0.2703	1.0148	0.40984	0.80845	0.31018	0.96437
Cdnf	0.12093	8058	10695	10418	4	-0.21456	-1.0588	0.19415	0.67599	0.28969	0.99964	-0.33549	-1.6472	0.10528	0.56375	0.09952	0.96437
Cdo1	-0.20331	2707	10471	11529	4	-0.49774	-1.5065	0.035122	0.41888	0.13193	0.99964	-0.29443	-0.89492	0.13211	0.60509	0.37083	0.96437
Cdon	0.52073	11086	11215	6854	4	0.02683	0.10179	0.87361	0.97576	0.91892	0.99964	-0.4939	-1.847	0.047257	0.4593	0.064749	0.96437
Cdpf1	-0.32212	1359	5136	10195	4	-0.18988	-0.67354	0.22911	0.70739	0.5006	0.99964	0.13224	0.47089	0.8872	0.98102	0.63772	0.97075
Cdr2	-0.180438	3051	7261	10010	4	-0.17217	-0.88438	0.26192	0.73656	0.37649	0.99964	0.0082676	0.042558	0.67561	0.91855	0.96605	0.99685
Cds2	-0.10599	4213	78	121	4	0.73444	0.67891	0.0007691	0.066667	0.49719	0.99964	0.84043	0.77893	0.00034182	0.043478	0.43602	0.96642
Cdsn	0.03558	6711	5818	4679	4	0.13096	0.42149	0.68014	0.93175	0.6734	0.99964	0.09538	0.30654	0.97761	0.99704	0.7592	0.97906
Cdt1	0.19377	8980	1990	414	4	0.53035	0.60518	0.010169	0.27869	0.54506	0.99964	0.33658	0.38135	0.24543	0.71351	0.70295	0.97373
Cdv3	0.148865	8406	8450	5855	4	0.074818	0.25591	0.916	0.9808	0.79802	0.99964	-0.074047	-0.25245	0.44856	0.82857	0.80069	0.98555
Cdyl	0.36727	10439	11362	10477	4	-0.22265	-0.89201	0.1833	0.66574	0.37239	0.99964	-0.58992	-2.3434	0.033242	0.41738	0.01911	0.96437
Cdyl2	-0.108789	4173	4447	6067	4	0.064241	0.32062	0.96351	0.99383	0.7485	0.99964	0.17303	0.86362	0.7356	0.93678	0.3878	0.96437
Ceacam1	-0.140239	3685	4281	6539	4	0.042111	0.16109	0.93796	0.9864	0.87203	0.99964	0.18235	0.69792	0.70176	0.92711	0.48523	0.96642
Ceacam16	-0.237462	2274	6750	10275	4	-0.19717	-0.8874	0.21868	0.70043	0.37486	0.99964	0.040292	0.18194	0.78551	0.95611	0.85563	0.98883
Cebpa	0.12448	8115	8944	7176	4	0.01023	0.044409	0.80952	0.96407	0.96458	0.99964	-0.11425	-0.49405	0.36327	0.7862	0.62127	0.97075
Cebpb	-0.158	3420	1714	3360	4	0.20247	0.36618	0.41472	0.82689	0.71423	0.99964	0.36047	0.65144	0.19971	0.67553	0.51476	0.96642
Cebpg	0.070923	7271	9015	8339	4	-0.049977	-0.23819	0.58289	0.90178	0.81173	0.99964	-0.1209	-0.57437	0.35148	0.78031	0.56572	0.96642
Cebpz	0.1164	7998	1265	422	4	0.52858	0.73271	0.010169	0.27869	0.46374	0.99964	0.41218	0.56711	0.12075	0.58697	0.57064	0.96642
Cebpzos	-0.18208	3024	2258	4645	4	0.13245	0.45976	0.67433	0.93078	0.64569	0.99964	0.31453	1.0923	0.29397	0.74696	0.27469	0.96437
Cecr2	0.28963	9925	4147	622	4	0.47979	1.7534	0.020253	0.36294	0.079541	0.99964	0.19016	0.6902	0.67177	0.91698	0.49007	0.96642
Cela1	-0.191591	2889	6792	9826	4	-0.15446	-0.72199	0.29756	0.76325	0.4703	0.99964	0.037131	0.17439	0.77423	0.95118	0.86156	0.98946
Celf1	0.419883	10728	8737	1674	4	0.32402	0.79452	0.13348	0.60398	0.4269	0.99964	-0.095863	-0.23216	0.40019	0.80772	0.81642	0.98591
Celf2	0.48033	10974	5200	241	4	0.60973	1.4232	0.0035891	0.17143	0.15469	0.99964	0.1294	0.29904	0.896	0.98102	0.76491	0.97993
Celf3	-0.00545	5989	3111	2576	4	0.24964	1.1022	0.27901	0.74834	0.27036	0.99964	0.25509	1.1245	0.45471	0.83195	0.2608	0.96437
Celf4	0.13771	8267	4574	1881	4	0.30358	1.0032	0.16664	0.65022	0.31577	0.99964	0.16587	0.54667	0.76406	0.94784	0.5846	0.96993
Celsr1	0.400192	10623	10970	7517	4	-0.0061978	-0.028206	0.74252	0.94631	0.9775	0.99964	-0.40639	-1.8313	0.074004	0.5181	0.067054	0.96437
Celsr3	-0.483912	472	6147	11383	4	-0.40684	-1.863	0.055717	0.48949	0.06246	0.99964	0.077072	0.35594	0.90882	0.98354	0.72189	0.97435
Cemip2	-0.24166	2225	854	2891	4	0.22923	0.68528	0.33362	0.78445	0.49316	0.99964	0.47089	1.4125	0.063664	0.50067	0.1578	0.96437
Cenpa	-0.279171	1770	2623	7205	4	0.009309	0.018607	0.80567	0.96399	0.98515	0.99964	0.28848	0.57615	0.35908	0.78489	0.56451	0.96642
Cenpb	-0.37001	1013	4079	10035	4	-0.17539	-0.75427	0.25517	0.72741	0.45068	0.99964	0.19462	0.83898	0.65425	0.91	0.40148	0.96437
Cenpc1	0.343126	10280	10458	6382	4	0.050036	0.16792	0.97308	0.99538	0.86664	0.99964	-0.29309	-0.97112	0.13323	0.60567	0.33149	0.96437
Cenpe	0.31973	10132	11451	11146	4	-0.33749	-0.83741	0.084259	0.54986	0.40236	0.99964	-0.65722	-1.6095	0.027944	0.41119	0.1075	0.96437
Cenpf	-0.26245	1953	5518	9783	4	-0.15164	-0.54706	0.30388	0.76506	0.58434	0.99964	0.11081	0.40149	0.96599	0.99588	0.68806	0.9733
Cenph	0.01516	6360	2890	2098	4	0.28537	0.63297	0.1986	0.68231	0.52675	0.99964	0.27021	0.60068	0.41002	0.80845	0.54805	0.96642
Cenpj	-0.082447	4603	7650	9137	4	-0.10027	-0.41194	0.42651	0.83386	0.68038	0.99964	-0.017823	-0.073004	0.60067	0.89359	0.9418	0.99565
Cenpk	0.35652	10373	4651	469	4	0.51728	0.92507	0.01222	0.29752	0.35493	0.99964	0.16076	0.284	0.78337	0.95531	0.77641	0.98203
Cenpm	0.399101	10615	6617	763	4	0.44819	0.83174	0.031533	0.40773	0.40555	0.99964	0.049089	0.089625	0.8155	0.96493	0.92859	0.99483
Cenpn	0.8951	11593	11293	1346	4	0.354	0.80131	0.096736	0.56878	0.42295	0.99964	-0.5411	-1.1817	0.038968	0.4287	0.23734	0.96437
Cenpo	0.433624	10785	8166	1144	4	0.38139	0.94977	0.071612	0.52045	0.34223	0.99964	-0.052234	-0.12797	0.50752	0.86074	0.89817	0.99373
Cenpp	0.449705	10860	11148	7595	4	-0.010325	-0.03238	0.7274	0.94515	0.97417	0.99964	-0.46003	-1.4224	0.055888	0.48337	0.15492	0.96437
Cenpq	0.0928	7618	2643	1150	4	0.38015	0.86896	0.073064	0.5239	0.38487	0.99964	0.28735	0.65439	0.3619	0.78586	0.51286	0.96642
Cenps	-0.00792	5951	1057	839	4	0.43379	1.4329	0.038028	0.4305	0.15188	0.99964	0.44171	1.4569	0.089985	0.54433	0.14514	0.96437
Cenpt	-0.54838	305	2744	10793	4	-0.26871	-0.57299	0.13365	0.60398	0.56665	0.99964	0.27967	0.60867	0.3825	0.79864	0.54274	0.96642
Cenpu	-0.129792	3849	7619	9715	4	-0.14557	-0.31314	0.31695	0.77173	0.75417	0.99964	-0.015778	-0.034308	0.60656	0.89611	0.97263	0.99752
Cenpv	0.51561	11074	10426	2899	4	0.22884	1.3245	0.33481	0.78466	0.18534	0.99964	-0.28677	-1.6431	0.13775	0.61456	0.10036	0.96437
Cenpw	-0.60367	217	2338	10946	4	-0.29477	-0.50029	0.11203	0.58226	0.61687	0.99964	0.3089	0.54034	0.30576	0.75168	0.58896	0.96993
Cenpx	-0.197534	2799	6308	9527	4	-0.13015	-0.71413	0.34985	0.79418	0.47515	0.99964	0.067384	0.37081	0.87754	0.98021	0.71078	0.97403
Cep104	-0.45865	564	3744	10636	4	-0.24362	-1.0225	0.15749	0.63683	0.30654	0.99964	0.21503	0.90851	0.58452	0.88613	0.36361	0.96437
Cep112	-0.27086	1859	1594	5265	4	0.10188	0.36169	0.80439	0.96399	0.71758	0.99964	0.37274	1.3252	0.178	0.65959	0.1851	0.96437
Cep120	0.16171	8569	10298	9134	4	-0.10014	-0.25705	0.42676	0.83386	0.79714	0.99964	-0.26185	-0.66742	0.15818	0.64601	0.5045	0.96642
Cep128	-0.15822	3416	9330	11021	4	-0.30868	-1.3068	0.10152	0.57006	0.19129	0.99964	-0.15046	-0.63942	0.29833	0.74914	0.52255	0.96642
Cep131	-0.199387	2763	4508	7958	4	-0.030057	-0.094421	0.6563	0.92472	0.92477	0.99964	0.16933	0.53314	0.75158	0.9438	0.59393	0.97075
Cep135	0.21457	9206	4557	1143	4	0.38142	1.2468	0.071612	0.52045	0.21246	0.99964	0.16685	0.54242	0.75996	0.94577	0.58753	0.96993
Cep152	0.069	7242	180	96	4	0.77139	1.5868	0.00042728	0.050505	0.11255	0.99964	0.70239	1.4425	0.0029055	0.16585	0.14917	0.96437
Cep162	-0.241959	2221	2035	5508	4	0.091221	0.28878	0.84746	0.97075	0.77275	0.99964	0.33318	1.056	0.25073	0.71456	0.29096	0.96437
Cep164	-0.10481	4232	1451	2135	4	0.2825	1.0277	0.20458	0.68807	0.30411	0.99964	0.38731	1.4082	0.15775	0.64601	0.15906	0.96437
Cep170	0.01578	6369	9113	9314	4	-0.11333	-0.40104	0.39053	0.81887	0.68839	0.99964	-0.12911	-0.45606	0.33601	0.7728	0.64835	0.97206
Cep170b	-0.00093	6073	2119	1657	4	0.32529	0.60518	0.13186	0.6036	0.54506	0.99964	0.32622	0.60647	0.26739	0.72734	0.5442	0.96642
Cep19	-0.48432	470	5334	11232	4	-0.36265	-1.3603	0.072295	0.52313	0.17373	0.99964	0.12167	0.45894	0.92377	0.98604	0.64628	0.97185
Cep192	0.51538	11073	11358	8639	4	-0.06961	-0.17833	0.51854	0.87576	0.85846	0.99964	-0.58499	-1.4717	0.034011	0.41762	0.14111	0.96437
Cep20	0.14644	8374	5080	2145	4	0.28173	1.017	0.20612	0.68881	0.30916	0.99964	0.13529	0.48601	0.8778	0.98021	0.62696	0.97075
Cep250	-0.06125	4954	5444	6290	4	0.05419	0.23806	0.99128	0.99836	0.81184	0.99964	0.11544	0.50625	0.9477	0.98983	0.61268	0.97075
Cep290	0.183921	8869	8943	5963	4	0.069801	0.37547	0.93907	0.9864	0.70731	0.99964	-0.11412	-0.61073	0.3637	0.78626	0.54138	0.96642
Cep295	-0.122774	3950	7249	9321	4	-0.11386	-0.37737	0.38857	0.81751	0.7059	0.99964	0.0089144	0.029527	0.67741	0.91866	0.97644	0.99802
Cep295nl	0.47036	10941	4300	190	4	0.65179	1.4063	0.0021364	0.12821	0.15963	0.99964	0.18143	0.38685	0.70458	0.92743	0.69887	0.9733
Cep350	0.46424	10921	5624	307	4	0.56954	1.4765	0.0063237	0.23794	0.13982	0.99964	0.1053	0.27007	0.98513	0.99758	0.78711	0.98449
Cep43	-0.335718	1253	1620	6709	4	0.033782	0.10317	0.90181	0.97958	0.91783	0.99964	0.3695	1.1314	0.18433	0.66739	0.2579	0.96437
Cep44	0.058969	7080	6587	5118	4	0.10963	0.42058	0.77243	0.95563	0.67406	0.99964	0.050661	0.19368	0.82097	0.96604	0.84643	0.98699
Cep55	0.302588	10015	10253	6451	4	0.046458	0.11856	0.95753	0.99186	0.90563	0.99964	-0.25613	-0.64708	0.16348	0.64869	0.51758	0.96642
Cep57	0.66971	11393	10665	1506	4	0.33867	1.0253	0.1128	0.58239	0.30522	0.99964	-0.33104	-0.98546	0.10819	0.56695	0.3244	0.96437
Cep57l1	0.02618	6555	9729	9930	4	-0.16511	-0.52925	0.2767	0.74631	0.59663	0.99964	-0.19129	-0.61065	0.23671	0.70591	0.54143	0.96642
Cep68	-0.146111	3594	6590	9063	4	-0.095478	-0.27514	0.4383	0.83689	0.78321	0.99964	0.050633	0.14614	0.82097	0.96604	0.88381	0.99186
Cep70	-0.08401	4574	3983	5014	4	0.1154	0.44621	0.7462	0.94646	0.65544	0.99964	0.19941	0.76969	0.63553	0.90552	0.44149	0.96642
Cep72	-0.031241	5543	5465	5678	4	0.083059	0.42547	0.88378	0.97808	0.67049	0.99964	0.1143	0.58495	0.95257	0.9919	0.55858	0.96642
Cep76	-0.163835	3313	7708	10151	4	-0.18554	-0.58002	0.23834	0.71734	0.5619	0.99964	-0.021705	-0.068187	0.58956	0.88937	0.94564	0.99571
Cep78	-0.18896	2935	580	1492	4	0.33979	1.1711	0.1116	0.58159	0.24155	0.99964	0.52875	1.823	0.032559	0.41738	0.068306	0.96437
Cep83	-0.39261	869	662	4987	4	0.11639	0.41685	0.74158	0.94614	0.67679	0.99964	0.509	1.8282	0.039566	0.4287	0.067524	0.96437
Cep85	-0.145708	3602	7154	9545	4	-0.1314	-0.40063	0.34729	0.79325	0.6887	0.99964	0.014308	0.043629	0.69612	0.92568	0.9652	0.99685
Cep85l	0.061688	7119	9371	9016	4	-0.092522	-0.39122	0.44736	0.84214	0.69563	0.99964	-0.15421	-0.65054	0.292	0.74574	0.51534	0.96642
Cep89	0.226874	9338	8316	4025	4	0.16422	0.69968	0.55281	0.89086	0.48413	0.99964	-0.062654	-0.26527	0.47847	0.84373	0.7908	0.98507
Cep95	0.12817	8160	7435	4796	4	0.12507	0.52186	0.70646	0.94123	0.60176	0.99964	-0.0030996	-0.012894	0.64348	0.90658	0.98971	0.99847
Cep97	0.042798	6836	8907	8595	4	-0.066852	-0.1383	0.52769	0.88088	0.89	0.99964	-0.10965	-0.22588	0.37241	0.79265	0.82129	0.98591
Cept1	0.03171	6642	3127	2093	4	0.28586	0.54759	0.1974	0.68021	0.58398	0.99964	0.25415	0.48854	0.45778	0.83349	0.62517	0.97075
Cercam	0.10774	7868	4902	2535	4	0.25296	0.91573	0.27132	0.74321	0.35981	0.99964	0.14522	0.52336	0.84148	0.97311	0.60072	0.97075
Cerk	-0.124329	3932	5831	7956	4	-0.029851	-0.082137	0.65681	0.92472	0.93454	0.99964	0.094478	0.2607	0.97462	0.99642	0.79432	0.98507
Cerkl	0.198082	9018	7798	3927	4	0.17004	0.5802	0.53179	0.88127	0.56178	0.99964	-0.028042	-0.095165	0.57024	0.87984	0.92418	0.99432
Cers4	-0.095772	4373	4993	6487	4	0.044548	0.19947	0.94864	0.98922	0.8419	0.99964	0.14032	0.62906	0.85891	0.9764	0.52931	0.96642
Cers5	-0.37539	968	261	2344	4	0.26718	0.93564	0.24013	0.71911	0.34946	0.99964	0.64257	2.2558	0.0064946	0.25246	0.024081	0.96437
Cers6	-0.131451	3821	3980	5993	4	0.068089	0.38215	0.94685	0.98867	0.70235	0.99964	0.19954	1.1205	0.63528	0.90538	0.26252	0.96437
Cert1	0.15625	8505	3232	1013	4	0.4037	0.84304	0.055461	0.48907	0.39921	0.99964	0.24745	0.51333	0.47676	0.84343	0.60772	0.97075
Ces1c	-0.273852	1826	8047	11065	4	-0.31798	-1.0596	0.095454	0.56557	0.28933	0.99964	-0.044128	-0.14732	0.52846	0.86744	0.88288	0.99186
Ces1d	0.18006	8814	5586	2075	4	0.28745	1.3181	0.19381	0.67599	0.18746	0.99964	0.10739	0.49	0.97761	0.99704	0.62413	0.97075
Ces1e	0.282432	9849	8385	3139	4	0.21409	0.89899	0.37985	0.81128	0.36866	0.99964	-0.068342	-0.28492	0.46317	0.83673	0.7757	0.98203
Ces1f	-0.18196	3028	2826	5502	4	0.09139	0.31708	0.84686	0.97075	0.75118	0.99964	0.27335	0.94992	0.40027	0.80772	0.34215	0.96437
Ces1g	-0.01606	5794	3795	3498	4	0.19498	0.91305	0.4401	0.83713	0.36121	0.99964	0.21104	0.98724	0.59699	0.89269	0.32353	0.96437
Ces2a	0.271253	9761	10367	7458	4	-0.0034073	-0.012896	0.75389	0.94994	0.98971	0.99964	-0.27466	-1.0313	0.14656	0.62844	0.30239	0.96437
Ces2e	0.151822	8455	8137	5267	4	0.10183	0.4431	0.80448	0.96399	0.65769	0.99964	-0.049992	-0.21668	0.51427	0.86436	0.82845	0.98591
Ces3a	-0.155066	3468	7915	10204	4	-0.19054	-0.81634	0.22859	0.70716	0.41431	0.99964	-0.035474	-0.15215	0.54922	0.8731	0.87907	0.99169
Ces3b	-0.43502	652	437	4568	4	0.13664	0.40591	0.65801	0.92472	0.68481	0.99964	0.57166	1.7051	0.018287	0.39411	0.088179	0.96437
Cetn2	0.52177	11090	10470	2920	4	0.22735	1.0976	0.33815	0.78612	0.27238	0.99964	-0.29442	-1.4014	0.13211	0.60509	0.1611	0.96437
Cetn3	0.09544	7668	5177	2945	4	0.22579	1.1241	0.34251	0.78865	0.26097	0.99964	0.13035	0.64697	0.89344	0.98102	0.51765	0.96642
Cetn4	0.372315	10468	10984	8089	4	-0.036845	-0.10803	0.63229	0.91913	0.91397	0.99964	-0.40916	-1.1842	0.072723	0.51795	0.23632	0.96437
Cfap126	-0.299989	1546	1574	5865	4	0.074531	0.32868	0.91771	0.98109	0.7424	0.99964	0.37452	1.6556	0.17535	0.65936	0.097799	0.96437
Cfap157	0.286124	9886	10020	6166	4	0.060174	0.31632	0.98282	0.99706	0.75176	0.99964	-0.22595	-1.1793	0.1945	0.67414	0.23828	0.96437
Cfap20	0.390255	10568	8146	1493	4	0.33968	0.62296	0.11169	0.58159	0.53331	0.99964	-0.050575	-0.091386	0.51265	0.86416	0.92719	0.99432
Cfap298	0.29816	9992	5517	975	4	0.4093	0.71826	0.052726	0.48574	0.4726	0.99964	0.11114	0.19297	0.96454	0.99498	0.84698	0.98707
Cfap36	0.169521	8671	7910	4610	4	0.13415	0.62914	0.6686	0.92948	0.52926	0.99964	-0.035371	-0.16516	0.54974	0.8731	0.86882	0.99077
Cfap410	0.167754	8645	8393	5330	4	0.098672	0.53024	0.81678	0.96636	0.59594	0.99964	-0.069082	-0.36975	0.46095	0.83486	0.71157	0.97403
Cfap45	-0.468839	525	1101	8037	4	-0.034239	-0.1116	0.64143	0.92166	0.91114	0.99964	0.4346	1.4296	0.096394	0.55377	0.15283	0.96437
Cfap69	0.09208	7605	10556	10444	4	-0.21867	-0.9058	0.18894	0.67091	0.36504	0.99964	-0.31075	-1.2813	0.12109	0.58748	0.20008	0.96437
Cfap74	-0.03514	5462	3770	3795	4	0.17772	0.74029	0.50009	0.86632	0.45912	0.99964	0.21286	0.8851	0.59144	0.88937	0.3761	0.96437
Cfap97	-0.168398	3236	6234	9069	4	-0.095837	-0.46033	0.43753	0.83689	0.64528	0.99964	0.072561	0.3489	0.89378	0.98102	0.72716	0.97435
Cfdp1	-0.35754	1097	283	2230	4	0.27522	0.76081	0.22039	0.70043	0.44677	0.99964	0.63276	1.7591	0.0072637	0.26235	0.078561	0.96437
Cfh	-0.169504	3218	8129	10448	4	-0.21898	-1.1516	0.1886	0.67082	0.24948	0.99964	-0.049476	-0.26011	0.51564	0.86447	0.79478	0.98507
Cfhr1	0.11461	7968	3252	1285	4	0.36088	1.4721	0.09007	0.55695	0.141	0.99964	0.24627	1.0012	0.48052	0.84503	0.31675	0.96437
Cfhr2	0.076715	7371	7035	5350	4	0.097778	0.47993	0.82037	0.96755	0.63128	0.99964	0.021063	0.10303	0.71928	0.9317	0.91794	0.99432
Cfi	-0.22076	2487	492	1552	4	0.33327	0.98894	0.12083	0.59389	0.32269	0.99964	0.55403	1.6463	0.022902	0.41119	0.099695	0.96437
Cfl2	-0.029139	5569	5662	5862	4	0.074631	0.38884	0.91702	0.9809	0.69739	0.99964	0.10377	0.53952	0.99171	0.99785	0.58953	0.96993
Cflar	0.20653	9114	2418	499	4	0.5094	1.0815	0.013673	0.3112	0.27946	0.99964	0.30287	0.63782	0.32208	0.76367	0.52359	0.96642
Cfp	0.03022	6615	5417	4357	4	0.14703	0.59396	0.61639	0.91443	0.55254	0.99964	0.11681	0.47089	0.94292	0.98933	0.63772	0.97075
Cgas	-0.29403	1609	2069	6653	4	0.03649	0.10771	0.91266	0.97992	0.91423	0.99964	0.33052	0.97981	0.25714	0.71917	0.32718	0.96437
Cggbp1	0.0705174	7268	7320	5864	4	0.074561	0.32343	0.91745	0.98099	0.74637	0.99964	0.0040436	0.017498	0.66382	0.9141	0.98604	0.99847
Cgn	0.002773	6139	8648	8917	4	-0.086764	-0.41887	0.46411	0.84859	0.67531	0.99964	-0.089537	-0.43151	0.41275	0.8105	0.6661	0.9733
Cgref1	0.265985	9716	10666	8567	4	-0.065335	-0.32079	0.53264	0.88127	0.74837	0.99964	-0.33132	-1.6142	0.10793	0.56695	0.10648	0.96437
Cgrrf1	-0.185781	2983	6135	9242	4	-0.10791	-0.49046	0.40685	0.82442	0.62381	0.99964	0.077871	0.35428	0.91147	0.98386	0.72313	0.97435
Chac1	0.342223	10277	7187	1338	4	0.35477	1.7029	0.096137	0.56811	0.088583	0.99964	0.012547	0.05981	0.6898	0.92413	0.95231	0.99606
Chac2	0.13136	8193	8149	5732	4	0.080689	0.28836	0.89378	0.97813	0.77307	0.99964	-0.050671	-0.18038	0.51239	0.86398	0.85685	0.98883
Chadl	0.30722	10046	9605	4724	4	0.12907	0.59764	0.68826	0.93456	0.55008	0.99964	-0.17815	-0.81707	0.2556	0.71917	0.41389	0.96642
Chaf1a	0.33952	10257	2324	193	4	0.64936	0.92296	0.0022218	0.13065	0.35603	0.99964	0.30984	0.4353	0.30337	0.75116	0.66334	0.97301
Chaf1b	-0.36779	1037	429	3265	4	0.20735	0.2608	0.40036	0.82193	0.79425	0.99964	0.57514	0.72988	0.017433	0.39411	0.46547	0.96642
Champ1	-0.52569	357	2009	10199	4	-0.19024	-0.78543	0.22876	0.70716	0.4322	0.99964	0.33545	1.395	0.24688	0.71351	0.163	0.96437
Chchd1	-0.29912	1550	997	4279	4	0.15124	0.43708	0.60067	0.90802	0.66205	0.99964	0.45036	1.3087	0.081097	0.52748	0.19063	0.96437
Chchd10	-0.353249	1130	2820	8806	4	-0.079479	-0.27145	0.48701	0.86101	0.78605	0.99964	0.27377	0.94346	0.39899	0.80772	0.34545	0.96437
Chchd2	0.155861	8496	6524	3205	4	0.21045	0.70682	0.39181	0.8189	0.47968	0.99964	0.054589	0.18243	0.83396	0.97075	0.85524	0.98883
Chchd3	0.136823	8259	6352	3368	4	0.20204	0.6456	0.41617	0.82753	0.51854	0.99964	0.065217	0.20703	0.87028	0.97904	0.83599	0.98591
Chchd4	-0.14365	3635	1282	2369	4	0.26572	0.51215	0.24329	0.72039	0.60855	0.99964	0.40937	0.7926	0.12494	0.59431	0.42801	0.96642
Chchd5	-0.07082	4789	2047	2427	4	0.26122	0.91325	0.25278	0.72665	0.36111	0.99964	0.33204	1.1614	0.25329	0.71785	0.24548	0.96437
Chchd6	0.10113	7767	5260	2929	4	0.2268	0.8756	0.33977	0.78612	0.38125	0.99964	0.12567	0.48339	0.90993	0.98386	0.62882	0.97075
Chchd7	-0.05581	5053	8832	9872	4	-0.15891	-0.56362	0.28867	0.75864	0.57301	0.99964	-0.1031	-0.36561	0.38455	0.79975	0.71466	0.97403
Chd1	-0.15216	3517	6329	8906	4	-0.085889	-0.42721	0.46642	0.85086	0.66923	0.99964	0.066271	0.33047	0.87361	0.97997	0.74105	0.97658
Chd1l	-0.15343	3503	245	550	4	0.49622	1.3056	0.016066	0.32929	0.19169	0.99964	0.64965	1.7126	0.0064092	0.25246	0.086795	0.96437
Chd2	-0.24166	2226	3418	7520	4	-0.0064097	-0.022752	0.74158	0.94614	0.98185	0.99964	0.23525	0.84018	0.51889	0.86454	0.40081	0.96437
Chd3	0.32226	10150	11075	9303	4	-0.11232	-0.45876	0.39412	0.82056	0.6464	0.99964	-0.43458	-1.7592	0.063152	0.49966	0.078541	0.96437
Chd4	-0.427851	687	8536	11541	4	-0.50838	-1.1033	0.033413	0.40942	0.26988	0.99964	-0.080529	-0.17675	0.43317	0.8197	0.8597	0.98883
Chd5	-0.121853	3962	6954	9065	4	-0.095545	-0.41135	0.43804	0.83689	0.68081	0.99964	0.026308	0.11328	0.73757	0.93775	0.90981	0.99413
Chd6	-0.03217	5522	3372	3288	4	0.2061	0.50659	0.40284	0.82218	0.61244	0.99964	0.23827	0.58403	0.50949	0.86231	0.5592	0.96642
Chd7	-0.28895	1654	4212	9175	4	-0.10296	-0.45492	0.41899	0.82922	0.64917	0.99964	0.18599	0.82318	0.68877	0.92401	0.4104	0.96642
Chd8	-0.01324	5843	1692	1393	4	0.34974	0.90637	0.10135	0.57006	0.36474	0.99964	0.36298	0.94124	0.19535	0.67434	0.34658	0.96437
Chd9	0.171945	8709	8490	5401	4	0.095293	0.36256	0.83071	0.97043	0.71694	0.99964	-0.076652	-0.29007	0.44206	0.82531	0.77176	0.98197
Chek1	0.107279	7857	7901	5911	4	0.072439	0.10424	0.92745	0.98387	0.91698	0.99964	-0.03484	-0.049861	0.55127	0.87387	0.96023	0.99671
Chek2	-0.327731	1313	3445	9042	4	-0.094211	-0.4089	0.44138	0.83834	0.68261	0.99964	0.23352	1.0175	0.5247	0.86678	0.30892	0.96437
Cherp	0.385815	10547	11164	8854	4	-0.082375	-0.25283	0.47641	0.85414	0.8004	0.99964	-0.46819	-1.4181	0.054093	0.481	0.15615	0.96437
Chfr	0.560811	11188	11421	8674	4	-0.071499	-0.22902	0.51162	0.87172	0.81885	0.99964	-0.63231	-1.9897	0.029824	0.41498	0.046629	0.96437
Chgb	0.164059	8595	10113	8729	4	-0.074061	-0.28407	0.50299	0.86867	0.77635	0.99964	-0.23812	-0.90826	0.18117	0.66395	0.36374	0.96437
Chic2	0.426601	10757	10717	5622	4	0.085581	0.37445	0.87165	0.97524	0.70807	0.99964	-0.34102	-1.4751	0.10263	0.56013	0.1402	0.96437
Chid1	-0.17015	3203	3503	6171	4	0.05992	0.23956	0.98342	0.99706	0.81067	0.99964	0.23007	0.9208	0.53555	0.86988	0.35716	0.96437
Chka	0.22321	9288	3642	790	4	0.44563	1.2559	0.0329	0.40776	0.20915	0.99964	0.22242	0.62273	0.56213	0.87617	0.53346	0.96642
Chkb	0.03536	6707	10389	10633	4	-0.24304	-0.70962	0.15801	0.63759	0.47794	0.99964	-0.2784	-0.81078	0.14399	0.62338	0.41749	0.96642
Chm	0.250124	9578	10199	7360	4	0.0016742	0.0050598	0.77286	0.95563	0.99596	0.99964	-0.24845	-0.74415	0.17108	0.65769	0.45678	0.96642
Chml	-0.10578	4217	3667	5029	4	0.1146	0.45304	0.75038	0.94853	0.65052	0.99964	0.22038	0.87188	0.56871	0.87924	0.38327	0.96437
Chmp1a	0.18025	8816	10488	9361	4	-0.11704	-0.4421	0.38019	0.81157	0.65841	0.99964	-0.29729	-1.1174	0.13023	0.60285	0.26382	0.96437
Chmp2a	0.24412	9505	8859	4520	4	0.13852	0.15185	0.65015	0.92314	0.87931	0.99964	-0.1056	-0.11474	0.38002	0.79681	0.90865	0.99413
Chmp2b	0.293578	9959	10778	8527	4	-0.062512	-0.26389	0.54127	0.88545	0.79186	0.99964	-0.35609	-1.4924	0.095796	0.55353	0.13558	0.96437
Chmp3	0.16717	8634	3350	997	4	0.40664	1.0696	0.054093	0.48618	0.2848	0.99964	0.23947	0.62529	0.50487	0.8601	0.53178	0.96642
Chmp4b	-0.73462	86	2241	11413	4	-0.4187	-0.94709	0.05247	0.48574	0.34359	0.99964	0.31592	0.72903	0.28961	0.74336	0.46598	0.96642
Chmp4c	-0.04226	5315	2622	2622	4	0.24637	0.99753	0.28867	0.75864	0.31851	0.99964	0.28863	1.1666	0.35883	0.78489	0.24336	0.96437
Chmp5	0.076985	7375	8960	8120	4	-0.038705	-0.15045	0.62502	0.91608	0.88041	0.99964	-0.11569	-0.44757	0.36096	0.78532	0.65446	0.97206
Chmp6	0.26447	9706	9016	4421	4	0.14347	0.42913	0.62955	0.91856	0.66783	0.99964	-0.121	-0.35867	0.35131	0.78022	0.71984	0.97435
Chmp7	0.540162	11128	8377	654	4	0.47277	1.1177	0.022389	0.37119	0.26369	0.99964	-0.067392	-0.15615	0.46479	0.83703	0.87592	0.99169
Chn1	-0.1844	3000	2082	4403	4	0.14476	0.62233	0.62528	0.91623	0.53373	0.99964	0.32916	1.4161	0.26055	0.72248	0.15674	0.96437
Chn2	-0.199847	2753	4756	8258	4	-0.045467	-0.15338	0.59998	0.90802	0.8781	0.99964	0.15438	0.52101	0.80602	0.96265	0.60236	0.97075
Chordc1	0.297632	9985	10837	8696	4	-0.072368	-0.20898	0.50837	0.87084	0.83447	0.99964	-0.37	-1.0559	0.088361	0.54193	0.29103	0.96437
Chp1	0.386112	10549	10924	7582	4	-0.0093283	-0.037301	0.73133	0.94523	0.97025	0.99964	-0.39544	-1.5656	0.077764	0.52179	0.11743	0.96437
Chpf	-0.000264	6084	6499	6252	4	0.056002	0.24877	0.99838	0.99949	0.80354	0.99964	0.056266	0.24919	0.84054	0.97311	0.80322	0.98555
Chpf2	0.232032	9391	8546	4297	4	0.15056	0.5479	0.60255	0.90852	0.58376	0.99964	-0.081472	-0.29436	0.43138	0.81827	0.76848	0.98045
Chpt1	-0.39085	883	278	2671	4	0.24363	0.64176	0.29551	0.76251	0.52103	0.99964	0.63448	1.6817	0.0069219	0.25796	0.092626	0.96437
Chrac1	-0.29548	1596	4389	9390	4	-0.11935	-0.50239	0.3731	0.80628	0.61539	0.99964	0.17613	0.74591	0.72424	0.93368	0.45572	0.96642
Chrm4	-0.271076	1857	6039	10179	4	-0.18805	-0.6984	0.23304	0.71201	0.48493	0.99964	0.083026	0.309	0.93001	0.98725	0.75732	0.97906
Chrna1	-0.0381456	5399	7395	8141	4	-0.039469	-0.16244	0.62271	0.91581	0.87096	0.99964	-0.0013234	-0.0054416	0.64767	0.90658	0.99566	0.99882
Chrnb1	-0.16982	3209	1467	3106	4	0.21582	0.73012	0.37378	0.80671	0.46532	0.99964	0.38564	1.3105	0.16014	0.64755	0.19001	0.96437
Chrnb2	0.012687	6315	6146	5537	4	0.089838	0.38806	0.8525	0.97099	0.69797	0.99964	0.077151	0.33222	0.90899	0.98363	0.73973	0.97634
Chst10	-0.05052	5162	8005	9002	4	-0.091957	-0.39299	0.44932	0.84257	0.69433	0.99964	-0.041437	-0.17679	0.53581	0.86988	0.85967	0.98883
Chst11	-0.02587	5620	819	750	4	0.45078	1.655	0.030508	0.40476	0.097921	0.99964	0.47665	1.7463	0.058708	0.49071	0.080752	0.96437
Chst12	-0.20128	2734	698	1938	4	0.29891	1.1565	0.17467	0.65904	0.24748	0.99964	0.50019	1.9373	0.045035	0.45081	0.052708	0.96437
Chst14	-0.17121	3189	461	1073	4	0.3937	1.2915	0.062382	0.50137	0.19653	0.99964	0.56491	1.855	0.019484	0.40141	0.063594	0.96437
Chst3	-0.048422	5200	7728	8678	4	-0.071652	-0.41142	0.51068	0.87148	0.68077	0.99964	-0.02323	-0.13333	0.5846	0.88614	0.89394	0.99321
Chst7	0.133389	8219	8602	6437	4	0.047386	0.13712	0.96155	0.99356	0.89094	0.99964	-0.086003	-0.24766	0.42018	0.81369	0.8044	0.98555
Chsy1	-0.009967	5904	6014	5869	4	0.074369	0.20886	0.91839	0.98137	0.83456	0.99964	0.084336	0.23674	0.93505	0.98799	0.81286	0.98591
Chtf18	0.02104	6441	4767	3841	4	0.17464	0.55843	0.51316	0.87307	0.57655	0.99964	0.1536	0.48969	0.80892	0.96336	0.62435	0.97075
Chtf8	-0.1599	3381	9306	11015	4	-0.30788	-0.84549	0.10212	0.57095	0.39784	0.99964	-0.14798	-0.40637	0.30243	0.75101	0.68447	0.9733
Chuk	-0.354406	1122	6758	11054	4	-0.31472	-1.6355	0.097419	0.56943	0.10195	0.99964	0.039686	0.20736	0.78346	0.95531	0.83573	0.98591
Churc1	-0.002542	6038	6403	6180	4	0.059566	0.26077	0.98522	0.99723	0.79427	0.99964	0.062108	0.2713	0.85917	0.9764	0.78616	0.98406
Ciao1	0.40903	10663	11666	11669	4	-0.74227	-1.2697	0.020509	0.3631	0.2042	0.99964	-1.1513	-1.9221	0.0069219	0.25796	0.054594	0.96437
Ciao2a	-0.286277	1687	2224	6780	4	0.030553	0.10337	0.88814	0.97813	0.91767	0.99964	0.31683	1.0735	0.28764	0.74125	0.28304	0.96437
Ciao2b	0.04857	6914	4415	2974	4	0.22362	0.51909	0.34883	0.79359	0.6037	0.99964	0.17505	0.4045	0.72902	0.9344	0.68584	0.9733
Ciao3	0.421212	10732	5880	486	4	0.51253	1.0085	0.013075	0.30723	0.31322	0.99964	0.091318	0.17713	0.963	0.99418	0.85941	0.98883
Ciapin1	-0.16021	3376	7647	10069	4	-0.17774	-0.54007	0.25115	0.7255	0.58915	0.99964	-0.01753	-0.053443	0.60169	0.89436	0.95738	0.99626
Ciart	0.318514	10123	8085	2268	4	0.27228	1.1334	0.22748	0.70716	0.25706	0.99964	-0.046234	-0.19112	0.52324	0.86678	0.84843	0.98741
Cib1	-0.144203	3626	5989	8473	4	-0.058652	-0.25204	0.55281	0.89086	0.80101	0.99964	0.085551	0.36759	0.93907	0.9892	0.71318	0.97403
Cib2	0.192788	8964	9412	6718	4	0.033318	0.1305	0.89968	0.97929	0.89617	0.99964	-0.15947	-0.62116	0.28234	0.73633	0.53449	0.96642
Cibar1	-0.148662	3558	3737	6026	4	0.066528	0.2385	0.95462	0.99131	0.8115	0.99964	0.21519	0.77185	0.58358	0.88585	0.4402	0.96642
Cic	-0.50478	423	1456	9369	4	-0.11778	-0.5458	0.37814	0.81006	0.5852	0.99964	0.387	1.801	0.15835	0.64601	0.071696	0.96437
Cideb	-0.165054	3293	5483	8372	4	-0.051734	-0.18547	0.57725	0.90084	0.85286	0.99964	0.11332	0.40648	0.95684	0.99308	0.68439	0.9733
Ciita	-0.33	1288	9881	11571	4	-0.53883	-1.8793	0.029995	0.40206	0.060201	0.99964	-0.20883	-0.72942	0.21304	0.68923	0.46575	0.96642
Cilk1	-0.24303	2209	803	2782	4	0.23697	0.92226	0.3114	0.76954	0.35639	0.99964	0.48	1.8694	0.056572	0.48569	0.061573	0.96437
Cinp	0.33534	10235	4847	606	4	0.48451	1.3281	0.018971	0.35016	0.18416	0.99964	0.14917	0.40451	0.82627	0.9671	0.68584	0.9733
Cip2a	0.37449	10489	4747	419	4	0.5296	1.4349	0.010169	0.27869	0.1513	0.99964	0.15511	0.41571	0.80362	0.96175	0.67762	0.9733
Cipc	0.010612	6277	8098	8090	4	-0.03688	-0.16145	0.6322	0.91913	0.87174	0.99964	-0.047492	-0.20741	0.51965	0.86476	0.83569	0.98591
Cir1	-0.6086	211	143	4842	4	0.12258	0.31553	0.71663	0.94263	0.75236	0.99964	0.73118	1.8992	0.0020509	0.14545	0.057539	0.96437
Cirbp	0.218421	9243	9367	6064	4	0.064461	0.30697	0.96249	0.99356	0.75887	0.99964	-0.15396	-0.72829	0.29286	0.74695	0.46643	0.96642
Cisd1	0.099022	7730	8918	7619	4	-0.011508	-0.038626	0.7233	0.94381	0.96919	0.99964	-0.11053	-0.36985	0.37105	0.7925	0.7115	0.97403
Cisd2	0.09651	7680	1649	695	4	0.46333	1.576	0.025466	0.38356	0.11503	0.99964	0.36682	1.2447	0.18851	0.6693	0.21325	0.96437
Cisd3	0.03666	6734	2273	1386	4	0.35023	1.1374	0.10109	0.57006	0.25538	0.99964	0.31357	1.0168	0.29576	0.74822	0.30925	0.96437
Cish	-0.110387	4141	6697	8592	4	-0.066571	-0.31813	0.52854	0.88098	0.75039	0.99964	0.043816	0.20939	0.79901	0.96086	0.83414	0.98591
Cited2	0.44792	10856	8949	1550	4	0.33349	0.96574	0.12066	0.59389	0.33417	0.99964	-0.11443	-0.32665	0.36319	0.7862	0.74393	0.97664
Ciz1	-0.232852	2335	3716	7704	4	-0.015852	-0.067458	0.70808	0.94159	0.94622	0.99964	0.217	0.92627	0.57853	0.88337	0.3543	0.96437
Ckap2	-0.187006	2967	5760	8949	4	-0.088612	-0.40469	0.45898	0.84548	0.68571	0.99964	0.098394	0.45082	0.98778	0.99767	0.65212	0.97206
Ckap2l	-0.000127	6088	6431	6145	4	0.060723	0.25289	0.97949	0.99678	0.80036	0.99964	0.06085	0.25302	0.85532	0.9764	0.80025	0.98555
Ckap4	0.04173	6822	4575	3262	4	0.2074	0.70116	0.40036	0.82193	0.4832	0.99964	0.16567	0.55941	0.76517	0.94823	0.57588	0.96759
Ckap5	0.338638	10251	6233	965	4	0.41152	0.80035	0.050761	0.48097	0.42351	0.99964	0.072882	0.14007	0.89463	0.98102	0.8886	0.99264
Ckb	0.29039	9933	7397	2048	4	0.28898	0.8447	0.19099	0.6742	0.39828	0.99964	-0.0014098	-0.0040943	0.6475	0.90658	0.99673	0.9992
Cklf	-0.01176	5868	9472	10052	4	-0.17657	-0.8084	0.25329	0.72665	0.41886	0.99964	-0.16481	-0.75454	0.27448	0.73233	0.45053	0.96642
Cks1b	-0.83409	57	4033	11634	4	-0.63689	-1.5732	0.024269	0.37616	0.11567	0.99964	0.1972	0.49932	0.64339	0.90658	0.61756	0.97075
Cks1brt	0.296096	9974	10558	7685	4	-0.014904	-0.045793	0.71108	0.94166	0.96348	0.99964	-0.311	-0.94705	0.12083	0.58697	0.34361	0.96437
Cks2	-0.23923	2254	9572	11403	4	-0.41387	-1.4017	0.053581	0.48574	0.16099	0.99964	-0.17464	-0.59689	0.25953	0.72224	0.55058	0.96642
Clasp2	0.26977	9746	2281	288	4	0.58245	1.45	0.0053837	0.21356	0.14705	0.99964	0.31268	0.77272	0.29756	0.74914	0.43969	0.96642
Clasrp	-0.237106	2283	7448	10617	4	-0.24101	-0.4212	0.16031	0.64049	0.67361	0.99964	-0.0039042	-0.006892	0.64109	0.90627	0.9945	0.99868
Clba1	-0.125962	3909	5843	7994	4	-0.032159	-0.11594	0.64869	0.92314	0.9077	0.99964	0.093803	0.33859	0.97223	0.99589	0.73491	0.97601
Clca2	0.277859	9811	9865	5942	4	0.071019	0.28968	0.93446	0.9856	0.77206	0.99964	-0.20684	-0.83736	0.21518	0.69094	0.40239	0.96437
Clcc1	0.12037	8049	10824	10648	4	-0.24548	-0.63276	0.15493	0.63083	0.52689	0.99964	-0.36585	-0.93955	0.090156	0.54433	0.34745	0.96437
Clcn1	0.126639	8136	6121	3300	4	0.20543	1.0421	0.40497	0.82312	0.29738	0.99964	0.078791	0.39853	0.9142	0.98463	0.69024	0.9733
Clcn2	0.25302	9601	10354	7750	4	-0.01827	-0.061623	0.70022	0.94	0.95086	0.99964	-0.27129	-0.90734	0.14955	0.63521	0.36423	0.96437
Clcn3	0.10651	7843	5670	3215	4	0.20986	0.7103	0.39335	0.82021	0.47752	0.99964	0.10335	0.34833	0.99291	0.99785	0.7276	0.97435
Clcn4	0.00986	6263	2170	1580	4	0.33134	1.101	0.12348	0.59549	0.27088	0.99964	0.32148	1.0655	0.27679	0.7333	0.28666	0.96437
Clcn5	0.08899	7549	10434	10295	4	-0.19931	-0.98187	0.21569	0.69975	0.32616	0.99964	-0.2883	-1.4148	0.13613	0.61152	0.15713	0.96437
Clcn6	0.12308	8093	7108	4476	4	0.14053	0.44472	0.64092	0.92138	0.65652	0.99964	0.01745	0.055026	0.70578	0.92743	0.95612	0.99626
Clcn7	-0.042315	5314	8753	9648	4	-0.13961	-0.66709	0.32858	0.78121	0.50472	0.99964	-0.097295	-0.46433	0.39745	0.80747	0.64241	0.97182
Cldn12	-0.187893	2949	2700	5400	4	0.095297	0.38702	0.83063	0.97043	0.69874	0.99964	0.28319	1.1511	0.3719	0.7925	0.2497	0.96437
Cldn23	0.22032	9265	8984	5255	4	0.10241	0.57436	0.80209	0.96347	0.56573	0.99964	-0.11791	-0.65845	0.35575	0.78187	0.51025	0.96642
Cldn34c1	-0.03053	5551	10915	11423	4	-0.42263	-1.7093	0.051701	0.48367	0.087392	0.99964	-0.3921	-1.5832	0.079046	0.52189	0.11336	0.96437
Cldnd1	0.11954	8036	3201	1229	4	0.36915	1.7442	0.08349	0.54857	0.081117	0.99964	0.24961	1.176	0.47163	0.84159	0.2396	0.96437
Clec10a	-0.25274	2093	438	1723	4	0.31886	0.64031	0.14151	0.61353	0.52197	0.99964	0.5716	1.1547	0.018287	0.39411	0.24821	0.96437
Clec11a	0.22019	9261	4723	1180	4	0.3766	1.1552	0.076397	0.53214	0.24799	0.99964	0.15641	0.47807	0.79935	0.96086	0.6326	0.97075
Clec12a	-0.285493	1696	2253	6809	4	0.029537	0.1289	0.88438	0.97808	0.89744	0.99964	0.31503	1.3795	0.29217	0.74597	0.16775	0.96437
Clec16a	-0.13148	3818	10042	11222	4	-0.36025	-1.1801	0.073064	0.5239	0.23795	0.99964	-0.22877	-0.75327	0.19108	0.67289	0.45129	0.96642
Clec1a	-0.320987	1371	3025	8483	4	-0.059287	-0.28272	0.55076	0.8907	0.7774	0.99964	0.2617	1.2516	0.43488	0.81978	0.21073	0.96437
Clec1b	0.154269	8479	9477	7615	4	-0.011391	-0.027832	0.72355	0.94392	0.9778	0.99964	-0.16566	-0.40385	0.27312	0.73001	0.68632	0.9733
Clec2d	0.30028	10007	9695	5057	4	0.11314	0.41427	0.75688	0.95093	0.67868	0.99964	-0.18714	-0.68052	0.24218	0.71124	0.49618	0.96642
Clec4a1	-0.204592	2687	7547	10426	4	-0.21541	-1.1212	0.19296	0.67581	0.26222	0.99964	-0.010818	-0.056405	0.61998	0.90082	0.95502	0.99626
Clec4a2	-0.095463	4379	6631	8297	4	-0.047616	-0.15599	0.59024	0.90394	0.87604	0.99964	0.047847	0.15655	0.81251	0.9642	0.8756	0.99169
Clec4a3	-0.29886	1551	2232	7044	4	0.01746	0.081132	0.83977	0.97043	0.93534	0.99964	0.31632	1.4734	0.28884	0.74259	0.14065	0.96437
Clec4d	-0.294115	1608	1450	5451	4	0.093225	0.45952	0.83909	0.97043	0.64586	0.99964	0.38734	1.9116	0.15775	0.64601	0.05593	0.96437
Clec4e	0.210572	9161	7242	3043	4	0.2198	0.71161	0.36199	0.80045	0.47671	0.99964	0.009228	0.02972	0.67843	0.91887	0.97629	0.99802
Clec4n	-0.04221	5318	5189	5577	4	0.08767	0.2955	0.86054	0.9723	0.76761	0.99964	0.12988	0.43706	0.89489	0.98102	0.66207	0.97294
Clec5a	-0.17892	3071	2242	4565	4	0.13678	0.4163	0.65749	0.92472	0.67719	0.99964	0.3157	0.96533	0.29021	0.74415	0.33438	0.96437
Clec7a	-0.12346	3940	2266	3571	4	0.19085	1.0227	0.4542	0.84352	0.30644	0.99964	0.31431	1.6836	0.29414	0.74696	0.092259	0.96437
Clec9a	0.125803	8127	8837	6952	4	0.021993	0.12704	0.85532	0.97128	0.89891	0.99964	-0.10381	-0.59746	0.38335	0.79879	0.5502	0.96642
Clhc1	0.243175	9498	9424	5685	4	0.082805	0.25444	0.88481	0.97808	0.79915	0.99964	-0.16037	-0.48981	0.28081	0.73504	0.62427	0.97075
Clic1	-0.2741	1824	682	2865	4	0.23098	0.59978	0.32832	0.78121	0.54865	0.99964	0.50508	1.3144	0.042471	0.44178	0.1887	0.96437
Clic4	-0.02178	5698	9260	9934	4	-0.16531	-0.84416	0.27594	0.74584	0.39858	0.99964	-0.14353	-0.7316	0.30875	0.75402	0.46441	0.96642
Clic6	-0.01148	5873	2557	2140	4	0.28214	1.2284	0.20492	0.68807	0.21929	0.99964	0.29362	1.2762	0.34627	0.77735	0.20189	0.96437
Clint1	-0.25947	2004	1059	3717	4	0.18193	0.74146	0.48513	0.85937	0.45842	0.99964	0.4414	1.8015	0.09007	0.54433	0.07162	0.96437
Clip1	-0.0945394	4395	5762	7317	4	0.0038336	0.01543	0.78209	0.95753	0.98769	0.99964	0.098373	0.39584	0.98778	0.99767	0.69222	0.9733
Clip2	-0.0544159	5082	7526	8542	4	-0.063591	-0.31424	0.53777	0.88397	0.75334	0.99964	-0.0091751	-0.045304	0.62579	0.90187	0.96387	0.99685
Clk1	0.178474	8787	7787	4274	4	0.15148	0.51463	0.59964	0.90802	0.60681	0.99964	-0.026994	-0.091067	0.57281	0.88085	0.92744	0.99432
[truncated: 9,712 more rows]
