# Supplementary material for: Mitochondrial respiration contributes to the interferon gamma response in antigen-presenting cells
Source: eLife. 2021 Nov 2;10:e65109. doi: 10.7554/eLife.65109 (PMC8598164; doi:10.7554/eLife.65109)
Supplement: Figure 2—source data 2. [file elife-65109-fig2-data2.xlsx]

## Sheet: GSEA_output
SupplementaryFile4. Gene Set Enrichment Analysis (GSEA) to identify pathways that regulate the IFNg resposne in macrophages
For additional details, see Materials and methods; gene sets/pathways queried courtesy of Merico et al. (2010) and Reimand et al. (2019); GSEA info per original publication (Subramanian et al., 2005)
Tab 1 "GSEA_output": GSEA results of pooled CRISPR analysis per analysis described in methods
Tab 2 "RankedGenes_input": Gene rank list as derived score calculated from MAGeCK-MLE beta scores and statistical testing
"Gene Set": Name of Gene set
"Size": number of genes that comprise gene set
"ES": Enrichment score
"NES": Normalized enrichment score; corrects for multiple testing
"NOM p-val": nominal p-value (not accounting for multiple testing)
"FDR q-val": adjusting for size of gene set and multiple testing
"FWER q-val": familywise-error rate, see Benjamini and Hochberg (1995)
"Rank at Max": position in the ranked list where maximum enrichment was reached
"Leading Edge": tags=%of gene hits before peak running enrichment score, i.e. fraciton of genes that contrbuted to enrichment of that pathway; list=% of genes in the ranked list before peak score reached; signal=enrichment signal strength)
Gene Set	Size	ES	NES	NOM p-val	FDR q-val	FWER p-val	RANK AT MAX	LEADING EDGE
COMPLEX I BIOGENESIS%REACTOME DATABASE ID RELEASE 74%6799198	43	0.863884	2.62246	0	0	0	762	tags=65%, list=7%, signal=69%
RESPIRATORY ELECTRON TRANSPORT%REACTOME DATABASE ID RELEASE 74%611105	78	0.749974	2.52572	0	0	0	762	tags=42%, list=7%, signal=45%
OXIDATIVE PHOSPHORYLATION%WIKIPATHWAYS_20201110%WP1248%MUS MUSCULUS	43	0.837364	2.52436	0	0	0	762	tags=51%, list=7%, signal=55%
RESPIRATORY ELECTRON TRANSPORT, ATP SYNTHESIS BY CHEMIOSMOTIC COUPLING, AND HEAT PRODUCTION BY UNCOUPLING PROTEINS.%REACTOME%R-HSA-163200.1	88	0.736366	2.46499	0	9.97127e-05	0.0005	762	tags=40%, list=7%, signal=42%
TYPE II INTERFERON SIGNALING (IFNG)%WIKIPATHWAYS_20201110%WP1253%MUS MUSCULUS	28	0.877403	2.45458	0	7.97701e-05	0.0005	5	tags=21%, list=0%, signal=21%
THE CITRIC ACID (TCA) CYCLE AND RESPIRATORY ELECTRON TRANSPORT%REACTOME%R-HSA-1428517.1	130	0.680133	2.44863	0	6.64751e-05	0.0005	1183	tags=37%, list=10%, signal=41%
INTERLEUKIN-2 FAMILY SIGNALING%REACTOME DATABASE ID RELEASE 74%451927	30	0.851239	2.39461	0	0.000220481	0.002	146	tags=13%, list=1%, signal=13%
BIOCARTA_PDGF_PATHWAY%MSIGDB_C2%BIOCARTA_PDGF_PATHWAY	28	0.846359	2.37429	0	0.000241385	0.0025	1	tags=7%, list=0%, signal=7%
SHP2 SIGNALING%PATHWAY INTERACTION DATABASE NCI-NATURE CURATED DATA%SHP2 SIGNALING	40	0.788299	2.34115	0	0.000300632	0.0035	4	tags=10%, list=0%, signal=10%
HALLMARK_IL6_JAK_STAT3_SIGNALING%MSIGDB_C2%HALLMARK_IL6_JAK_STAT3_SIGNALING	67	0.714462	2.32989	0	0.000309167	0.004	552	tags=15%, list=5%, signal=16%
ELECTRON TRANSPORT CHAIN%WIKIPATHWAYS_20201110%WP295%MUS MUSCULUS	75	0.702349	2.3192	0	0.00038473	0.0055	1148	tags=39%, list=10%, signal=43%
INTERLEUKIN-12 FAMILY SIGNALING%REACTOME DATABASE ID RELEASE 74%447115	37	0.797191	2.31904	0	0.000352669	0.0055	430	tags=14%, list=4%, signal=14%
PID_SHP2_PATHWAY%MSIGDB_C2%PID_SHP2_PATHWAY	41	0.783844	2.31524	0	0.000357317	0.006	4	tags=10%, list=0%, signal=10%
BIOCARTA_EGF_PATHWAY%MSIGDB_C2%BIOCARTA_EGF_PATHWAY	27	0.837901	2.29622	0	0.000524891	0.0095	1	tags=7%, list=0%, signal=7%
INTERFERON GAMMA SIGNALING%REACTOME%R-HSA-877300.3	59	0.716307	2.29279	0	0.000489899	0.0095	179	tags=12%, list=2%, signal=12%
BIOCARTA_TID_PATHWAY%MSIGDB_C2%BIOCARTA_TID_PATHWAY	14	0.943908	2.26028	0	0.000725001	0.015	28	tags=36%, list=0%, signal=36%
INTERFERON ALPHA BETA SIGNALING%REACTOME DATABASE ID RELEASE 74%909733	40	0.744421	2.23513	0	0.00136622	0.03	430	tags=20%, list=4%, signal=21%
IL27-MEDIATED SIGNALING EVENTS%PATHWAY INTERACTION DATABASE NCI-NATURE CURATED DATA%IL27-MEDIATED SIGNALING EVENTS	15	0.915399	2.23284	0	0.0014392	0.0335	430	tags=33%, list=4%, signal=35%
PID_IL27_PATHWAY%MSIGDB_C2%PID_IL27_PATHWAY	15	0.915399	2.22858	0	0.00156639	0.0385	430	tags=33%, list=4%, signal=35%
POTENTIAL THERAPEUTICS FOR SARS%REACTOME%R-HSA-9679191.2	59	0.700749	2.22344	0	0.0016414	0.0425	4	tags=7%, list=0%, signal=7%
SIGNALING BY SCF-KIT%REACTOME%R-HSA-1433557.4	34	0.752678	2.20031	0	0.00266636	0.072	443	tags=12%, list=4%, signal=12%
INTERLEUKIN-3, INTERLEUKIN-5 AND GM-CSF SIGNALING%REACTOME DATABASE ID RELEASE 74%512988	35	0.755379	2.19928	0	0.00268444	0.076	399	tags=11%, list=3%, signal=12%
INTERLEUKIN-10 SIGNALING%REACTOME%R-HSA-6783783.3	28	0.794897	2.19851	0	0.00260152	0.077	430	tags=18%, list=4%, signal=18%
TGF BETA SIGNALING PATHWAY%WIKIPATHWAYS_20201110%WP113%MUS MUSCULUS	43	0.725776	2.19227	0	0.00274995	0.084	850	tags=16%, list=7%, signal=17%
INTERLEUKIN-6 FAMILY SIGNALING%REACTOME DATABASE ID RELEASE 74%6783589	14	0.914441	2.18788	0	0.00293452	0.0925	4	tags=21%, list=0%, signal=21%
BIOCARTA_IL10_PATHWAY%MSIGDB_C2%BIOCARTA_IL10_PATHWAY	13	0.943681	2.18574	0	0.00294045	0.096	1	tags=15%, list=0%, signal=15%
INTERLEUKIN-12 SIGNALING%REACTOME DATABASE ID RELEASE 74%9020591	32	0.763887	2.18479	0	0.00286115	0.097	1385	tags=31%, list=12%, signal=35%
IFN-GAMMA PATHWAY%PATHWAY INTERACTION DATABASE NCI-NATURE CURATED DATA%IFN-GAMMA PATHWAY	38	0.72883	2.17712	0	0.00343579	0.1175	5	tags=13%, list=0%, signal=13%
SIGNALING BY PHOSPHORYLATED JUXTAMEMBRANE, EXTRACELLULAR AND KINASE DOMAIN KIT MUTANTS%REACTOME DATABASE ID RELEASE 74%9670439	15	0.890674	2.16865	0	0.00386291	0.1355	4	tags=13%, list=0%, signal=13%
INTERLEUKIN-20 FAMILY SIGNALING%REACTOME DATABASE ID RELEASE 74%8854691	13	0.930629	2.16824	0	0.00374758	0.136	4	tags=23%, list=0%, signal=23%
PID_IFNG_PATHWAY%MSIGDB_C2%PID_IFNG_PATHWAY	38	0.72883	2.16444	0	0.00392487	0.145	5	tags=13%, list=0%, signal=13%
IFN-GAMMA%IOB%IFN-GAMMA	37	0.740737	2.15948	0	0.00426542	0.161	5	tags=14%, list=0%, signal=13%
BIOCARTA_GLEEVEC_PATHWAY%MSIGDB_C2%BIOCARTA_GLEEVEC_PATHWAY	22	0.810011	2.15794	0	0.00428807	0.167	4	tags=9%, list=0%, signal=9%
BIOCARTA_TPO_PATHWAY%MSIGDB_C2%BIOCARTA_TPO_PATHWAY	20	0.840482	2.15781	0	0.00417388	0.167	4	tags=10%, list=0%, signal=10%
INTERLEUKIN RECEPTOR SHC SIGNALING%REACTOME%R-HSA-912526.4	18	0.855808	2.14618	0	0.00505858	0.203	146	tags=17%, list=1%, signal=17%
SIGNALING BY KIT IN DISEASE%REACTOME%R-HSA-9669938.2	15	0.890674	2.13887	0	0.0055718	0.228	4	tags=13%, list=0%, signal=13%
IFN-ALPHA%IOB%IFN-ALPHA	28	0.750463	2.12934	0.00117096	0.00651556	0.271	1	tags=7%, list=0%, signal=7%
BIOCARTA_IL6_PATHWAY%MSIGDB_C2%BIOCARTA_IL6_PATHWAY	20	0.82503	2.11345	0	0.00826697	0.338	4	tags=10%, list=0%, signal=10%
INTERFERON-GAMMA SIGNALING PATHWAY%PANTHER PATHWAY%P00035	23	0.786928	2.10069	0.00117509	0.0101221	0.4	146	tags=26%, list=1%, signal=26%
BIOCARTA_IL22BP_PATHWAY%MSIGDB_C2%BIOCARTA_IL22BP_PATHWAY	12	0.918379	2.0983	0	0.0102958	0.414	4	tags=25%, list=0%, signal=25%
SIGNALING BY PDGFR IN DISEASE%REACTOME DATABASE ID RELEASE 74%9671555	17	0.832616	2.09138	0	0.0110465	0.439	381	tags=18%, list=3%, signal=18%
TNF RECEPTOR SIGNALING PATHWAY%PATHWAY INTERACTION DATABASE NCI-NATURE CURATED DATA%TNF RECEPTOR SIGNALING PATHWAY	42	0.686293	2.08918	0	0.0111497	0.45	986	tags=19%, list=8%, signal=21%
IL23-MEDIATED SIGNALING EVENTS%PATHWAY INTERACTION DATABASE NCI-NATURE CURATED DATA%IL23-MEDIATED SIGNALING EVENTS	20	0.804061	2.08367	0.00222469	0.0119045	0.479	430	tags=20%, list=4%, signal=21%
INTERLEUKIN-15 SIGNALING%REACTOME DATABASE ID RELEASE 74%8983432	13	0.887247	2.0765	0	0.0128473	0.512	0	tags=8%, list=0%, signal=8%
PID_IL23_PATHWAY%MSIGDB_C2%PID_IL23_PATHWAY	20	0.804061	2.07111	0	0.0135922	0.541	430	tags=20%, list=4%, signal=21%
NOTCH3 INTRACELLULAR DOMAIN REGULATES TRANSCRIPTION%REACTOME DATABASE ID RELEASE 74%9013508	16	0.840573	2.06734	0.00321888	0.0140037	0.5595	598	tags=19%, list=5%, signal=20%
PID_TNF_PATHWAY%MSIGDB_C2%PID_TNF_PATHWAY	42	0.686293	2.06694	0.00118765	0.0137956	0.5615	986	tags=19%, list=8%, signal=21%
BIOCARTA_IL2_PATHWAY%MSIGDB_C2%BIOCARTA_IL2_PATHWAY	18	0.81802	2.06637	0.00107759	0.0136141	0.565	0	tags=6%, list=0%, signal=6%
INTERLEUKIN-6 SIGNALING%REACTOME%R-HSA-1059683.3	10	0.935922	2.06468	0	0.0136691	0.575	4	tags=30%, list=0%, signal=30%
BIOCARTA_IL7_PATHWAY%MSIGDB_C2%BIOCARTA_IL7_PATHWAY	17	0.818529	2.061	0	0.0140689	0.5945	0	tags=6%, list=0%, signal=6%
IL-7 SIGNALING PATHWAY%WIKIPATHWAYS_20201110%WP297%MUS MUSCULUS	43	0.673367	2.04402	0	0.0170722	0.6775	5	tags=7%, list=0%, signal=7%
PID_TCPTP_PATHWAY%MSIGDB_C2%PID_TCPTP_PATHWAY	37	0.690696	2.04215	0.00236686	0.0171282	0.6845	1	tags=5%, list=0%, signal=5%
ST_INTERLEUKIN_4_PATHWAY%MSIGDB_C2%ST_INTERLEUKIN_4_PATHWAY	22	0.766555	2.02832	0.00116686	0.0199595	0.7465	4	tags=9%, list=0%, signal=9%
INTERFERON SIGNALING%REACTOME%R-HSA-913531.2	131	0.56701	2.02604	0	0.0200177	0.7525	196	tags=8%, list=2%, signal=8%
G-CSF%IOB%G-CSF	40	0.676927	2.02299	0.00233645	0.0203196	0.7615	430	tags=15%, list=4%, signal=16%
BIOCARTA_NKT_PATHWAY%MSIGDB_C2%BIOCARTA_NKT_PATHWAY	12	0.888038	2.01843	0	0.0208169	0.777	3	tags=17%, list=0%, signal=17%
SIGNALING EVENTS MEDIATED BY TCPTP%PATHWAY INTERACTION DATABASE NCI-NATURE CURATED DATA%SIGNALING EVENTS MEDIATED BY TCPTP	34	0.699553	2.01537	0.00247525	0.0212649	0.7905	1	tags=6%, list=0%, signal=6%
BIOCARTA_PML_PATHWAY%MSIGDB_C2%BIOCARTA_PML_PATHWAY	14	0.845672	2.01015	0.00210084	0.0219858	0.8095	598	tags=36%, list=5%, signal=38%
SIGNALING EVENTS MEDIATED BY STEM CELL FACTOR RECEPTOR (C-KIT)%PATHWAY INTERACTION DATABASE NCI-NATURE CURATED DATA%SIGNALING EVENTS MEDIATED BY STEM CELL FACTOR RECEPTOR (C-KIT)	48	0.645115	2.00979	0	0.0217573	0.812	146	tags=8%, list=1%, signal=8%
SIGNALING BY FGFR1 IN DISEASE%REACTOME DATABASE ID RELEASE 74%5655302	20	0.768533	2.00435	0.00344828	0.0228795	0.8335	1	tags=5%, list=0%, signal=5%
PID_KIT_PATHWAY%MSIGDB_C2%PID_KIT_PATHWAY	48	0.645115	1.99997	0.001221	0.0237154	0.849	146	tags=8%, list=1%, signal=8%
PID_IL6_7_PATHWAY%MSIGDB_C2%PID_IL6_7_PATHWAY	42	0.659896	1.99944	0.00362319	0.0235126	0.853	5	tags=10%, list=0%, signal=9%
OTHER INTERLEUKIN SIGNALING%REACTOME DATABASE ID RELEASE 74%449836	19	0.781466	1.99755	0.00545256	0.0235158	0.8605	430	tags=11%, list=4%, signal=11%
JAK STAT SIGNALING PATHWAY%PANTHER PATHWAY%P00038	14	0.827664	1.99524	0.00105374	0.0236738	0.8635	4	tags=21%, list=0%, signal=21%
IL5%NETPATH%IL5	53	0.631449	1.99446	0	0.0235064	0.8665	195	tags=9%, list=2%, signal=10%
INTERLEUKIN-4 AND INTERLEUKIN-13 SIGNALING%REACTOME%R-HSA-6785807.6	75	0.596046	1.99	0.00133333	0.024112	0.877	457	tags=12%, list=4%, signal=12%
HALLMARK_ALLOGRAFT_REJECTION%MSIGDB_C2%HALLMARK_ALLOGRAFT_REJECTION	140	0.556323	1.98795	0	0.0242662	0.8845	443	tags=11%, list=4%, signal=12%
INFLAMMATORY RESPONSE PATHWAY%WIKIPATHWAYS_20201110%WP458%MUS MUSCULUS	16	0.821787	1.98732	0.003386	0.0240685	0.8865	457	tags=25%, list=4%, signal=26%
INTERLEUKIN-7 SIGNALING%REACTOME DATABASE ID RELEASE 74%1266695	19	0.788341	1.9815	0.0087241	0.0251394	0.8985	0	tags=5%, list=0%, signal=5%
IL4%NETPATH%IL4	65	0.606265	1.97973	0.0012837	0.0251871	0.9015	146	tags=8%, list=1%, signal=8%
DOWNSTREAM SIGNAL TRANSDUCTION%REACTOME%R-HSA-186763.2	23	0.741527	1.97195	0.00454545	0.026569	0.9185	1	tags=4%, list=0%, signal=4%
PID_PDGFRA_PATHWAY%MSIGDB_C2%PID_PDGFRA_PATHWAY	17	0.777479	1.97158	0.003386	0.0263228	0.919	0	tags=6%, list=0%, signal=6%
IL-3 SIGNALING PATHWAY%WIKIPATHWAYS_20201110%WP373%MUS MUSCULUS	91	0.573327	1.97088	0	0.0261274	0.9195	519	tags=12%, list=4%, signal=13%
IL-7%NETPATH%IL-7	28	0.704027	1.97057	0.00584795	0.0258632	0.9205	195	tags=11%, list=2%, signal=11%
HALLMARK_OXIDATIVE_PHOSPHORYLATION%MSIGDB_C2%HALLMARK_OXIDATIVE_PHOSPHORYLATION	172	0.522726	1.97011	0	0.0256318	0.922	874	tags=22%, list=7%, signal=23%
IL6-MEDIATED SIGNALING EVENTS%PATHWAY INTERACTION DATABASE NCI-NATURE CURATED DATA%IL6-MEDIATED SIGNALING EVENTS	42	0.659896	1.96807	0.00240964	0.0258515	0.9235	5	tags=10%, list=0%, signal=9%
PDGFR-ALPHA SIGNALING PATHWAY%PATHWAY INTERACTION DATABASE NCI-NATURE CURATED DATA%PDGFR-ALPHA SIGNALING PATHWAY	17	0.777479	1.96258	0.00444444	0.02673	0.931	0	tags=6%, list=0%, signal=6%
PDGF SIGNALING PATHWAY%PANTHER PATHWAY%P00047	101	0.562389	1.95998	0	0.0270013	0.9345	195	tags=4%, list=2%, signal=4%
IL-5 SIGNALING PATHWAY%WIKIPATHWAYS_20201110%WP151%MUS MUSCULUS	63	0.608509	1.95626	0.00121507	0.0275206	0.9395	195	tags=8%, list=2%, signal=8%
SIGNALING BY NOTCH3%REACTOME DATABASE ID RELEASE 74%9012852	33	0.682192	1.95526	0.00578704	0.0273995	0.94	598	tags=15%, list=5%, signal=16%
TSH%NETPATH%TSH	67	0.584667	1.95158	0	0.0279278	0.946	4	tags=4%, list=0%, signal=4%
SIGNALING BY PDGFRA EXTRACELLULAR DOMAIN MUTANTS%REACTOME DATABASE ID RELEASE 74%9673770	10	0.879929	1.94841	0.00111111	0.0283879	0.951	1	tags=10%, list=0%, signal=10%
SIGNALING BY CYTOSOLIC FGFR1 FUSION MUTANTS%REACTOME%R-HSA-1839117.2	12	0.843838	1.9448	0.00646552	0.0288238	0.9575	1	tags=8%, list=0%, signal=8%
REGULATION OF IFNG SIGNALING%REACTOME%R-HSA-877312.2	10	0.903712	1.94304	0.0010395	0.0289126	0.9585	146	tags=50%, list=1%, signal=51%
FGFR1 MUTANT RECEPTOR ACTIVATION%REACTOME DATABASE ID RELEASE 74%1839124	15	0.806223	1.94195	0.00643777	0.0288269	0.96	1	tags=7%, list=0%, signal=7%
ENDOCHONDRAL OSSIFICATION%WIKIPATHWAYS_20201110%WP1270%MUS MUSCULUS	33	0.675944	1.93711	0.00120482	0.0297061	0.9635	931	tags=15%, list=8%, signal=16%
IL-2 SIGNALING PATHWAY%WIKIPATHWAYS_20201110%WP450%MUS MUSCULUS	70	0.585693	1.92067	0.00124688	0.0333967	0.979	146	tags=7%, list=1%, signal=7%
IL2%NETPATH%IL2	72	0.579784	1.91868	0.00128205	0.0334907	0.982	146	tags=7%, list=1%, signal=7%
SIGNALING BY PDGFRA TRANSMEMBRANE, JUXTAMEMBRANE AND KINASE DOMAIN MUTANTS%REACTOME DATABASE ID RELEASE 74%9673767	10	0.879929	1.91825	0	0.0332537	0.983	1	tags=10%, list=0%, signal=10%
SA_MMP_CYTOKINE_CONNECTION%MSIGDB_C2%SA_MMP_CYTOKINE_CONNECTION	12	0.81546	1.89453	0.00419287	0.0391203	0.9905	262	tags=25%, list=2%, signal=26%
MITOCHONDRIAL TRANSLATION%REACTOME DATABASE ID RELEASE 74%5368287	87	0.547434	1.88737	0.00128205	0.0407771	0.993	2101	tags=40%, list=18%, signal=49%
CXCR4%IOB%CXCR4	76	0.570447	1.88546	0.00254777	0.0407532	0.9935	158	tags=7%, list=1%, signal=7%
IL-9 SIGNALING PATHWAY%WIKIPATHWAYS_20201110%WP10%MUS MUSCULUS	22	0.706755	1.87868	0.0111982	0.0421118	0.994	1	tags=9%, list=0%, signal=9%
IL2 SIGNALING EVENTS MEDIATED BY PI3K%PATHWAY INTERACTION DATABASE NCI-NATURE CURATED DATA%IL2 SIGNALING EVENTS MEDIATED BY PI3K	29	0.661258	1.8712	0.00551876	0.0437388	0.9965	329	tags=7%, list=3%, signal=7%
IL9%NETPATH%IL9	22	0.715693	1.86885	0.00810185	0.0439782	0.9965	1	tags=9%, list=0%, signal=9%
CCR1%IOB%CCR1	21	0.705932	1.86048	0.00557414	0.0459244	0.9975	1	tags=10%, list=0%, signal=10%
M-CSF%IOB%M-CSF	56	0.592133	1.85714	0.003663	0.046424	0.998	146	tags=7%, list=1%, signal=7%
GM-CSF%IOB%GM-CSF	75	0.556633	1.84776	0.0026178	0.0487138	0.998	195	tags=7%, list=2%, signal=7%
PID_IL2_PI3K_PATHWAY%MSIGDB_C2%PID_IL2_PI3K_PATHWAY	29	0.661258	1.84585	0.0159453	0.0487811	0.998	329	tags=7%, list=3%, signal=7%
TNFS BIND THEIR PHYSIOLOGICAL RECEPTORS%REACTOME DATABASE ID RELEASE 74%5669034	13	0.790323	1.84004	0.00742312	0.0498895	0.999	247	tags=23%, list=2%, signal=24%
IL6%NETPATH%IL6	76	0.550473	1.83738	0.00677507	0.0501929	0.999	8	tags=5%, list=0%, signal=5%
PID_IL2_1PATHWAY%MSIGDB_C2%PID_IL2_1PATHWAY	50	0.584514	1.83668	0.0134804	0.0499113	0.999	1	tags=4%, list=0%, signal=4%
KIT RECEPTOR SIGNALING PATHWAY%WIKIPATHWAYS_20201110%WP407%MUS MUSCULUS	59	0.56793	1.83444	0.0037831	0.050103	0.999	146	tags=5%, list=1%, signal=5%
CXCR4-MEDIATED SIGNALING EVENTS%PATHWAY INTERACTION DATABASE NCI-NATURE CURATED DATA%CXCR4-MEDIATED SIGNALING EVENTS	66	0.570067	1.83425	0.00619579	0.0496808	0.999	519	tags=9%, list=4%, signal=9%
LEPTIN%NETPATH%LEPTIN	81	0.542852	1.83342	0.00395257	0.0494284	0.999	679	tags=11%, list=6%, signal=12%
SIGNALING BY PDGF%REACTOME%R-HSA-186797.4	35	0.633065	1.83149	0.0130024	0.0494798	0.999	1	tags=3%, list=0%, signal=3%
TNFR1-INDUCED PROAPOPTOTIC SIGNALING%REACTOME DATABASE ID RELEASE 74%5357786	13	0.769177	1.83049	0.00438597	0.0492586	0.999	260	tags=23%, list=2%, signal=24%
HALLMARK_INTERFERON_GAMMA_RESPONSE%MSIGDB_C2%HALLMARK_INTERFERON_GAMMA_RESPONSE	161	0.493914	1.8234	0.00149477	0.0508827	0.999	1211	tags=17%, list=10%, signal=19%
IL-6 SIGNALING PATHWAY%WIKIPATHWAYS_20201110%WP387%MUS MUSCULUS	90	0.532258	1.8221	0	0.0508011	0.999	9	tags=6%, list=0%, signal=6%
IL2-MEDIATED SIGNALING EVENTS%PATHWAY INTERACTION DATABASE NCI-NATURE CURATED DATA%IL2-MEDIATED SIGNALING EVENTS	49	0.586702	1.82076	0.00985222	0.0507324	0.999	1	tags=4%, list=0%, signal=4%
BIOCARTA_RELA_PATHWAY%MSIGDB_C2%BIOCARTA_RELA_PATHWAY	16	0.734486	1.79828	0.00933489	0.0571571	0.9995	929	tags=31%, list=8%, signal=34%
PID_CXCR4_PATHWAY%MSIGDB_C2%PID_CXCR4_PATHWAY	78	0.540225	1.79307	0	0.0583412	0.9995	519	tags=9%, list=4%, signal=9%
PID_EPO_PATHWAY%MSIGDB_C2%PID_EPO_PATHWAY	28	0.639248	1.78755	0.0159272	0.0597173	0.9995	146	tags=11%, list=1%, signal=11%
NON-ODORANT GPCRS%WIKIPATHWAYS_20201110%WP1396%MUS MUSCULUS	66	0.544281	1.7839	0.00996264	0.060408	0.9995	1919	tags=36%, list=16%, signal=43%
IL2 SIGNALING EVENTS MEDIATED BY STAT5%PATHWAY INTERACTION DATABASE NCI-NATURE CURATED DATA%IL2 SIGNALING EVENTS MEDIATED BY STAT5	22	0.661222	1.76969	0.0114943	0.0649556	1	0	tags=5%, list=0%, signal=5%
MITOCHONDRIAL TRANSLATION INITIATION%REACTOME DATABASE ID RELEASE 74%5368286	81	0.523599	1.76428	0.00645995	0.0663776	1	2101	tags=38%, list=18%, signal=46%
EGFR1 SIGNALING PATHWAY%WIKIPATHWAYS_20201110%WP572%MUS MUSCULUS	147	0.484931	1.76234	0.00148588	0.066519	1	1116	tags=14%, list=10%, signal=16%
EPO SIGNALING PATHWAY%PATHWAY INTERACTION DATABASE NCI-NATURE CURATED DATA%EPO SIGNALING PATHWAY	27	0.644846	1.75827	0.0150637	0.0674256	1	146	tags=11%, list=1%, signal=11%
SARS-COV INFECTIONS%REACTOME%R-HSA-9679506.2	111	0.498818	1.75489	0.00276243	0.0680728	1	470	tags=8%, list=4%, signal=8%
IL12-MEDIATED SIGNALING EVENTS%PATHWAY INTERACTION DATABASE NCI-NATURE CURATED DATA%IL12-MEDIATED SIGNALING EVENTS	40	0.583365	1.74487	0.0154394	0.0712161	1	430	tags=10%, list=4%, signal=10%
IL4-MEDIATED SIGNALING EVENTS%PATHWAY INTERACTION DATABASE NCI-NATURE CURATED DATA%IL4-MEDIATED SIGNALING EVENTS	44	0.570163	1.74181	0.0153483	0.0717949	1	146	tags=9%, list=1%, signal=9%
PID_GMCSF_PATHWAY%MSIGDB_C2%PID_GMCSF_PATHWAY	34	0.595356	1.73935	0.0140187	0.0722988	1	4	tags=6%, list=0%, signal=6%
MITOCHONDRIAL TRANSLATION TERMINATION%REACTOME DATABASE ID RELEASE 74%5419276	81	0.520731	1.73923	0.0067659	0.0717703	1	2101	tags=38%, list=18%, signal=46%
GROWTH HORMONE RECEPTOR SIGNALING%REACTOME%R-HSA-982772.1	18	0.690548	1.73329	0.0137143	0.0735662	1	412	tags=22%, list=4%, signal=23%
PID_IL2_STAT5_PATHWAY%MSIGDB_C2%PID_IL2_STAT5_PATHWAY	22	0.661222	1.73034	0.0111732	0.0742039	1	0	tags=5%, list=0%, signal=5%
GMCSF-MEDIATED SIGNALING EVENTS%PATHWAY INTERACTION DATABASE NCI-NATURE CURATED DATA%GMCSF-MEDIATED SIGNALING EVENTS	33	0.600333	1.72646	0.0175644	0.0751846	1	4	tags=6%, list=0%, signal=6%
RAF-INDEPENDENT MAPK1 3 ACTIVATION%REACTOME DATABASE ID RELEASE 74%112409	20	0.669176	1.71733	0.0176887	0.0786222	1	430	tags=25%, list=4%, signal=26%
ANTIVIRAL MECHANISM BY IFN-STIMULATED GENES%REACTOME DATABASE ID RELEASE 74%1169410	64	0.52889	1.71599	0.0102041	0.0785707	1	196	tags=6%, list=2%, signal=6%
IL12 SIGNALING MEDIATED BY STAT4%PATHWAY INTERACTION DATABASE NCI-NATURE CURATED DATA%IL12 SIGNALING MEDIATED BY STAT4	17	0.689593	1.71249	0.0182992	0.0795547	1	850	tags=24%, list=7%, signal=25%
D-<I>MYO< I>-INOSITOL (1,3,4)-TRISPHOSPHATE BIOSYNTHESIS%HUMANCYC%PWY-6364	14	0.712486	1.70446	0.0173348	0.0827463	1	2182	tags=64%, list=19%, signal=79%
CLASS A 1 (RHODOPSIN-LIKE RECEPTORS)%REACTOME%R-HSA-373076.7	81	0.504602	1.70394	0.00930851	0.0823246	1	1942	tags=31%, list=17%, signal=37%
EPO%IOB%EPO	44	0.551328	1.70187	0.0157005	0.0826086	1	1063	tags=20%, list=9%, signal=22%
PID_IL4_2PATHWAY%MSIGDB_C2%PID_IL4_2PATHWAY	45	0.566208	1.70121	0.0241423	0.0823176	1	146	tags=9%, list=1%, signal=9%
BIOCARTA_CHEMICAL_PATHWAY%MSIGDB_C2%BIOCARTA_CHEMICAL_PATHWAY	20	0.660703	1.69975	0.0202931	0.0823182	1	519	tags=15%, list=4%, signal=16%
EPO RECEPTOR SIGNALING%WIKIPATHWAYS_20201110%WP1249%MUS MUSCULUS	23	0.635255	1.69747	0.0235018	0.0827611	1	4	tags=9%, list=0%, signal=9%
ISG15 ANTIVIRAL MECHANISM%REACTOME%R-HSA-1169408.2	56	0.536419	1.69446	0.0108827	0.0835596	1	1	tags=4%, list=0%, signal=4%
MITOCHONDRIAL TRANSLATION ELONGATION%REACTOME%R-HSA-5389840.1	81	0.502952	1.69318	0.0067659	0.0835436	1	2101	tags=38%, list=18%, signal=46%
BIOCARTA_EPO_PATHWAY%MSIGDB_C2%BIOCARTA_EPO_PATHWAY	15	0.692066	1.69034	0.0140237	0.0842269	1	801	tags=20%, list=7%, signal=21%
OXIDATIVE STRESS RESPONSE%PANTHER PATHWAY%P00046	34	0.589617	1.69022	0.0192077	0.0836791	1	850	tags=15%, list=7%, signal=16%
BIOCARTA_IL3_PATHWAY%MSIGDB_C2%BIOCARTA_IL3_PATHWAY	14	0.706576	1.68946	0.0132013	0.0833982	1	146	tags=14%, list=1%, signal=14%
HALLMARK_INFLAMMATORY_RESPONSE%MSIGDB_C2%HALLMARK_INFLAMMATORY_RESPONSE	143	0.458721	1.68655	0	0.0842544	1	1958	tags=24%, list=17%, signal=28%
PID_IL12_2PATHWAY%MSIGDB_C2%PID_IL12_2PATHWAY	43	0.556686	1.68307	0.0220049	0.0853164	1	430	tags=9%, list=4%, signal=10%
GPCRS, CLASS A RHODOPSIN-LIKE%WIKIPATHWAYS_20201110%WP189%MUS MUSCULUS	41	0.553428	1.6677	0.0264423	0.0926315	1	1843	tags=34%, list=16%, signal=40%
TNFSF3%IOB%TNFSF3	12	0.709562	1.66277	0.0283843	0.0947599	1	1189	tags=42%, list=10%, signal=46%
BIOCARTA_SODD_PATHWAY%MSIGDB_C2%BIOCARTA_SODD_PATHWAY	10	0.748425	1.65131	0.0228453	0.100279	1	28	tags=20%, list=0%, signal=20%
BIOCARTA_P38MAPK_PATHWAY%MSIGDB_C2%BIOCARTA_P38MAPK_PATHWAY	28	0.58908	1.63949	0.019209	0.106586	1	1	tags=4%, list=0%, signal=4%
RANKL%NETPATH%RANKL	72	0.49395	1.6361	0.0149864	0.107842	1	929	tags=15%, list=8%, signal=16%
BIOCARTA_NFKB_PATHWAY%MSIGDB_C2%BIOCARTA_NFKB_PATHWAY	23	0.611336	1.63243	0.0287026	0.109394	1	1239	tags=22%, list=11%, signal=24%
SIGNALING BY RETINOIC ACID%REACTOME%R-HSA-5362517.2	29	0.570526	1.63207	0.0198366	0.108893	1	1037	tags=21%, list=9%, signal=23%
RA BIOSYNTHESIS PATHWAY%REACTOME%R-HSA-5365859.2	13	0.697465	1.6231	0.0263158	0.11383	1	797	tags=23%, list=7%, signal=25%
SIG_IL4RECEPTOR_IN_B_LYPHOCYTES%MSIGDB_C2%SIG_IL4RECEPTOR_IN_B_LYPHOCYTES	27	0.575326	1.61004	0.0285388	0.121662	1	195	tags=7%, list=2%, signal=8%
BIOCARTA_IL2RB_PATHWAY%MSIGDB_C2%BIOCARTA_IL2RB_PATHWAY	33	0.561838	1.60849	0.0312876	0.122049	1	146	tags=6%, list=1%, signal=6%
P38 MAPK SIGNALING PATHWAY%WIKIPATHWAYS_20201110%WP350%MUS MUSCULUS	28	0.579574	1.60529	0.0315789	0.123471	1	257	tags=7%, list=2%, signal=7%
APOPTOSIS MODULATION BY HSP70%WIKIPATHWAYS_20201110%WP166%MUS MUSCULUS	14	0.671416	1.60313	0.0307167	0.124091	1	324	tags=14%, list=3%, signal=15%
CASPASE CASCADE IN APOPTOSIS%PATHWAY INTERACTION DATABASE NCI-NATURE CURATED DATA%CASPASE CASCADE IN APOPTOSIS	41	0.524459	1.58384	0.0268293	0.137625	1	2161	tags=41%, list=18%, signal=51%
SUPERPATHWAY OF D-<I>MYO< I>-INOSITOL (1,4,5)-TRISPHOSPHATE METABOLISM%HUMANCYC%PWY-6358	18	0.629003	1.57837	0.0417124	0.141063	1	2182	tags=50%, list=19%, signal=61%
THE CANONICAL RETINOID CYCLE IN RODS (TWILIGHT VISION)%REACTOME DATABASE ID RELEASE 74%2453902	11	0.697284	1.57754	0.0347368	0.140801	1	1850	tags=55%, list=16%, signal=65%
COLLAGEN DEGRADATION%REACTOME DATABASE ID RELEASE 74%1442490	24	0.583081	1.57277	0.0424028	0.143744	1	2377	tags=38%, list=20%, signal=47%
TCA CYCLE%WIKIPATHWAYS_20201110%WP434%MUS MUSCULUS	29	0.555853	1.57067	0.0378007	0.144523	1	2111	tags=34%, list=18%, signal=42%
BIOCARTA_BIOPEPTIDES_PATHWAY%MSIGDB_C2%BIOCARTA_BIOPEPTIDES_PATHWAY	30	0.553994	1.56286	0.0367734	0.150005	1	4	tags=7%, list=0%, signal=7%
TNFSF1%IOB%TNFSF1	15	0.650388	1.55787	0.0480447	0.153184	1	1189	tags=33%, list=10%, signal=37%
ANGIOGENESIS%PANTHER PATHWAY%P00005	111	0.44138	1.54851	0.0181311	0.160468	1	1	tags=2%, list=0%, signal=2%
LEPTIN%IOB%LEPTIN	42	0.519418	1.54829	0.030525	0.159688	1	195	tags=10%, list=2%, signal=10%
SIGNALING EVENTS MEDIATED BY HDAC CLASS III%PATHWAY INTERACTION DATABASE NCI-NATURE CURATED DATA%SIGNALING EVENTS MEDIATED BY HDAC CLASS III	22	0.581071	1.54746	0.0360885	0.159445	1	1025	tags=23%, list=9%, signal=25%
ERYTHROPOIETIN ACTIVATES RAS%REACTOME DATABASE ID RELEASE 74%9027284	10	0.704848	1.54645	0.0465608	0.159332	1	4	tags=10%, list=0%, signal=10%
EGF RECEPTOR (ERBB1) SIGNALING PATHWAY%PATHWAY INTERACTION DATABASE NCI-NATURE CURATED DATA%EGF RECEPTOR (ERBB1) SIGNALING PATHWAY	30	0.550136	1.54638	0.0369048	0.158435	1	146	tags=7%, list=1%, signal=7%
KITRECEPTOR%IOB%KITRECEPTOR	82	0.45603	1.54561	0.0209699	0.158155	1	195	tags=5%, list=2%, signal=5%
PID_ERBB1_RECEPTOR_PROXIMAL_PATHWAY%MSIGDB_C2%PID_ERBB1_RECEPTOR_PROXIMAL_PATHWAY	32	0.543603	1.54528	0.0484262	0.157501	1	146	tags=6%, list=1%, signal=6%
IL3%NETPATH%IL3	76	0.46769	1.53708	0.0269576	0.163844	1	519	tags=11%, list=4%, signal=11%
PID_CASPASE_PATHWAY%MSIGDB_C2%PID_CASPASE_PATHWAY	42	0.506963	1.53224	0.0459364	0.167462	1	2161	tags=40%, list=18%, signal=49%
PID_FGF_PATHWAY%MSIGDB_C2%PID_FGF_PATHWAY	33	0.529379	1.53026	0.0408401	0.168272	1	1	tags=3%, list=0%, signal=3%
TSLP%NETPATH%TSLP	139	0.418177	1.52971	0.00894188	0.167806	1	335	tags=7%, list=3%, signal=7%
FGF SIGNALING PATHWAY%PATHWAY INTERACTION DATABASE NCI-NATURE CURATED DATA%FGF SIGNALING PATHWAY	31	0.542197	1.52287	0.0438909	0.17318	1	1	tags=3%, list=0%, signal=3%
PID_HDAC_CLASSIII_PATHWAY%MSIGDB_C2%PID_HDAC_CLASSIII_PATHWAY	22	0.581071	1.52198	0.0580866	0.17304	1	1025	tags=23%, list=9%, signal=25%
REGULATION OF TNFR1 SIGNALING%REACTOME%R-HSA-5357905.3	28	0.546605	1.52114	0.0520833	0.172838	1	679	tags=14%, list=6%, signal=15%
ERYTHROPOIETIN ACTIVATES PHOSPHOINOSITIDE-3-KINASE (PI3K)%REACTOME%R-HSA-9027276.1	10	0.689815	1.52007	0.0565262	0.172863	1	1363	tags=30%, list=12%, signal=34%
PID_IL12_STAT4_PATHWAY%MSIGDB_C2%PID_IL12_STAT4_PATHWAY	20	0.577758	1.51556	0.0532609	0.176085	1	850	tags=20%, list=7%, signal=22%
TNFR1-INDUCED NFKAPPAB SIGNALING PATHWAY%REACTOME DATABASE ID RELEASE 74%5357956	25	0.560815	1.51125	0.0444698	0.179274	1	679	tags=16%, list=6%, signal=17%
BIOCARTA_HIVNEF_PATHWAY%MSIGDB_C2%BIOCARTA_HIVNEF_PATHWAY	53	0.477571	1.50859	0.0359802	0.180921	1	2161	tags=40%, list=18%, signal=48%
HALLMARK_TGF_BETA_SIGNALING%MSIGDB_C2%HALLMARK_TGF_BETA_SIGNALING	47	0.484753	1.50584	0.0434243	0.182624	1	725	tags=11%, list=6%, signal=11%
PID_IL5_PATHWAY%MSIGDB_C2%PID_IL5_PATHWAY	12	0.65395	1.50278	0.0607676	0.184786	1	1159	tags=25%, list=10%, signal=28%
TNF SIGNALING%REACTOME DATABASE ID RELEASE 74%75893	36	0.510589	1.49404	0.0474407	0.192614	1	679	tags=14%, list=6%, signal=15%
HALLMARK_APOPTOSIS%MSIGDB_C2%HALLMARK_APOPTOSIS	125	0.419218	1.49152	0.0191257	0.194193	1	2165	tags=30%, list=19%, signal=36%
REGULATION OF FOXO TRANSCRIPTIONAL ACTIVITY BY ACETYLATION%REACTOME%R-HSA-9617629.1	10	0.67224	1.48608	0.0788609	0.199008	1	1025	tags=40%, list=9%, signal=44%
P73 TRANSCRIPTION FACTOR NETWORK%PATHWAY INTERACTION DATABASE NCI-NATURE CURATED DATA%P73 TRANSCRIPTION FACTOR NETWORK	63	0.453359	1.4798	0.0467172	0.204703	1	151	tags=6%, list=1%, signal=6%
CONSTITUTIVE SIGNALING BY NOTCH1 HD DOMAIN MUTANTS%REACTOME DATABASE ID RELEASE 74%2691232	10	0.666429	1.46944	0.0739935	0.215283	1	412	tags=20%, list=4%, signal=21%
PYRUVATE METABOLISM AND CITRIC ACID (TCA) CYCLE%REACTOME DATABASE ID RELEASE 74%71406	46	0.474144	1.46912	0.0395062	0.214519	1	2176	tags=35%, list=19%, signal=43%
DOWNREGULATION OF SMAD2 3:SMAD4 TRANSCRIPTIONAL ACTIVITY%REACTOME DATABASE ID RELEASE 74%2173795	19	0.577872	1.46897	0.0674157	0.21354	1	2124	tags=37%, list=18%, signal=45%
IL5-MEDIATED SIGNALING EVENTS%PATHWAY INTERACTION DATABASE NCI-NATURE CURATED DATA%IL5-MEDIATED SIGNALING EVENTS	12	0.653949	1.46696	0.0802676	0.214584	1	1159	tags=25%, list=10%, signal=28%
SIGNALING BY NOTCH1 HD DOMAIN MUTANTS IN CANCER%REACTOME DATABASE ID RELEASE 74%2691230	10	0.666429	1.46613	0.0834248	0.21441	1	412	tags=20%, list=4%, signal=21%
PID_P73PATHWAY%MSIGDB_C2%PID_P73PATHWAY	63	0.453358	1.46358	0.0345269	0.216139	1	151	tags=6%, list=1%, signal=6%
ADIPOGENESIS GENES%WIKIPATHWAYS_20201110%WP447%MUS MUSCULUS	89	0.433203	1.45663	0.0450928	0.223248	1	97	tags=2%, list=1%, signal=2%
APOPTOTIC CLEAVAGE OF CELLULAR PROTEINS%REACTOME DATABASE ID RELEASE 74%111465	24	0.538014	1.45324	0.0594286	0.226124	1	2076	tags=50%, list=18%, signal=61%
PID_REG_GR_PATHWAY%MSIGDB_C2%PID_REG_GR_PATHWAY	58	0.459029	1.44961	0.0572852	0.229231	1	887	tags=17%, list=8%, signal=19%
INTERLEUKIN SIGNALING PATHWAY%PANTHER PATHWAY%P00036	60	0.450327	1.44906	0.0507614	0.228775	1	679	tags=7%, list=6%, signal=7%
A TETRASACCHARIDE LINKER SEQUENCE IS REQUIRED FOR GAG SYNTHESIS%REACTOME DATABASE ID RELEASE 74%1971475	14	0.601765	1.44904	0.0753498	0.22763	1	298	tags=14%, list=3%, signal=15%
CITRIC ACID CYCLE (TCA CYCLE)%REACTOME DATABASE ID RELEASE 74%71403	19	0.559063	1.44844	0.0740332	0.227236	1	874	tags=26%, list=7%, signal=28%
GLUCOCORTICOID RECEPTOR REGULATORY NETWORK%PATHWAY INTERACTION DATABASE NCI-NATURE CURATED DATA%GLUCOCORTICOID RECEPTOR REGULATORY NETWORK	58	0.459029	1.44599	0.0618687	0.229009	1	887	tags=17%, list=8%, signal=19%
LUNG FIBROSIS%WIKIPATHWAYS_20201110%WP3632%MUS MUSCULUS	31	0.514157	1.44487	0.0562061	0.229283	1	2044	tags=35%, list=17%, signal=43%
HALLMARK_ESTROGEN_RESPONSE_LATE%MSIGDB_C2%HALLMARK_ESTROGEN_RESPONSE_LATE	128	0.402252	1.44441	0.0260989	0.228724	1	577	tags=7%, list=5%, signal=7%
KITRECEPTOR%NETPATH%KITRECEPTOR	93	0.420047	1.44138	0.0573333	0.231125	1	195	tags=4%, list=2%, signal=4%
HIV-1 NEF: NEGATIVE EFFECTOR OF FAS AND TNF-ALPHA%PATHWAY INTERACTION DATABASE NCI-NATURE CURATED DATA%HIV-1 NEF: NEGATIVE EFFECTOR OF FAS AND TNF-ALPHA	29	0.51566	1.43943	0.0816327	0.232339	1	1546	tags=31%, list=13%, signal=36%
COMPLEMENT ACTIVATION, CLASSICAL PATHWAY%WIKIPATHWAYS_20201110%WP200%MUS MUSCULUS	12	0.629067	1.43841	0.0803965	0.232414	1	165	tags=17%, list=1%, signal=17%
PID_HIV_NEF_PATHWAY%MSIGDB_C2%PID_HIV_NEF_PATHWAY	31	0.513727	1.43629	0.0681551	0.233887	1	1546	tags=32%, list=13%, signal=37%
SIGNALING BY FGFR IN DISEASE%REACTOME DATABASE ID RELEASE 74%1226099	35	0.494168	1.43563	0.0640394	0.233559	1	1	tags=3%, list=0%, signal=3%
EGFR1%IOB%EGFR1	356	0.353133	1.4351	0.00175439	0.233058	1	1467	tags=17%, list=13%, signal=18%
SYNTHESIS OF IP3 AND IP4 IN THE CYTOSOL%REACTOME%R-HSA-1855204.3	17	0.567851	1.42539	0.0855188	0.243801	1	2811	tags=53%, list=24%, signal=70%
REGULATION OF PYRUVATE DEHYDROGENASE (PDH) COMPLEX%REACTOME DATABASE ID RELEASE 74%204174	14	0.596282	1.42298	0.102564	0.245756	1	1616	tags=29%, list=14%, signal=33%
ST_TUMOR_NECROSIS_FACTOR_PATHWAY%MSIGDB_C2%ST_TUMOR_NECROSIS_FACTOR_PATHWAY	28	0.509734	1.4212	0.0726392	0.246826	1	986	tags=18%, list=8%, signal=19%
CHEMOKINE SIGNALING PATHWAY%WIKIPATHWAYS_20201110%WP2292%MUS MUSCULUS	132	0.389882	1.42107	0.0452555	0.245826	1	700	tags=9%, list=6%, signal=10%
NABA_ECM_AFFILIATED%MSIGDB_C2%NABA_ECM_AFFILIATED	61	0.437693	1.41825	0.0528351	0.248343	1	2924	tags=39%, list=25%, signal=52%
SIGNALING BY ERYTHROPOIETIN%REACTOME DATABASE ID RELEASE 74%9006335	19	0.554293	1.41775	0.0894309	0.247802	1	4	tags=5%, list=0%, signal=5%
BIOCARTA_DEATH_PATHWAY%MSIGDB_C2%BIOCARTA_DEATH_PATHWAY	28	0.507031	1.41709	0.0652709	0.247551	1	2326	tags=50%, list=20%, signal=62%
CASPASE-MEDIATED CLEAVAGE OF CYTOSKELETAL PROTEINS%REACTOME DATABASE ID RELEASE 74%264870	10	0.639516	1.41631	0.106681	0.247407	1	2076	tags=50%, list=18%, signal=61%
EGFR1%NETPATH%EGFR1	366	0.350899	1.41532	0.0093985	0.24745	1	1467	tags=16%, list=13%, signal=18%
ST_JNK_MAPK_PATHWAY%MSIGDB_C2%ST_JNK_MAPK_PATHWAY	35	0.488305	1.41343	0.0809859	0.248663	1	1063	tags=26%, list=9%, signal=28%
STATIN PATHWAY%WIKIPATHWAYS_20201110%WP1%MUS MUSCULUS	17	0.565876	1.40519	0.0969626	0.258136	1	1688	tags=35%, list=14%, signal=41%
PINK1-PRKN MEDIATED MITOPHAGY%REACTOME%R-HSA-5205685.3	16	0.563889	1.39672	0.0983784	0.268144	1	1019	tags=25%, list=9%, signal=27%
HALLMARK_KRAS_SIGNALING_UP%MSIGDB_C2%HALLMARK_KRAS_SIGNALING_UP	130	0.38815	1.39365	0.0380282	0.271081	1	2225	tags=31%, list=19%, signal=38%
GPCRS, OTHER%WIKIPATHWAYS_20201110%WP41%MUS MUSCULUS	30	0.495925	1.38758	0.087574	0.278007	1	2836	tags=47%, list=24%, signal=61%
FACTORS AND PATHWAYS AFFECTING INSULIN-LIKE GROWTH FACTOR (IGF1)-AKT SIGNALING%WIKIPATHWAYS_20201110%WP3675%MUS MUSCULUS	26	0.506135	1.38641	0.0946882	0.278278	1	133	tags=8%, list=1%, signal=8%
D-<I>MYO< I>-INOSITOL (1,4,5)-TRISPHOSPHATE DEGRADATION%HUMANCYC%PWY-6363	11	0.609682	1.38335	0.126327	0.281311	1	2109	tags=45%, list=18%, signal=55%
LEPTIN INSULIN OVERLAP%WIKIPATHWAYS_20201110%WP578%MUS MUSCULUS	12	0.603389	1.36907	0.124336	0.300545	1	4	tags=8%, list=0%, signal=8%
SALVAGE PATHWAYS OF PYRIMIDINE RIBONUCLEOTIDES%HUMANCYC%PWY0-163	13	0.565622	1.35572	0.137895	0.319114	1	527	tags=23%, list=5%, signal=24%
FAS SIGNALING PATHWAY%PANTHER PATHWAY%P00020	26	0.493793	1.35432	0.108747	0.319768	1	850	tags=23%, list=7%, signal=25%
IRAK4 DEFICIENCY (TLR2 4)%REACTOME%R-HSA-5603041.1	11	0.604291	1.3483	0.142705	0.32787	1	22	tags=9%, list=0%, signal=9%
CD40%IOB%CD40	25	0.503504	1.34635	0.121462	0.329469	1	1	tags=4%, list=0%, signal=4%
BIOCARTA_CD40_PATHWAY%MSIGDB_C2%BIOCARTA_CD40_PATHWAY	13	0.569623	1.34294	0.139559	0.333406	1	1239	tags=31%, list=11%, signal=34%
PRIMARY FOCAL SEGMENTAL GLOMERULOSCLEROSIS FSGS%WIKIPATHWAYS_20201110%WP2573%MUS MUSCULUS	53	0.427224	1.33985	0.0889454	0.336878	1	1350	tags=26%, list=12%, signal=30%
GLYOXYLATE METABOLISM AND GLYCINE DEGRADATION%REACTOME DATABASE ID RELEASE 74%389661	25	0.488172	1.33832	0.117312	0.33784	1	2919	tags=40%, list=25%, signal=53%
MITOCHONDRIAL FATTY ACID BETA-OXIDATION%REACTOME DATABASE ID RELEASE 74%77289	29	0.476334	1.33218	0.106888	0.346351	1	2909	tags=45%, list=25%, signal=60%
PID_PTP1B_PATHWAY%MSIGDB_C2%PID_PTP1B_PATHWAY	38	0.448407	1.33165	0.107692	0.345717	1	430	tags=8%, list=4%, signal=8%
MYD88 DEFICIENCY (TLR2 4)%REACTOME DATABASE ID RELEASE 74%5602498	10	0.60506	1.33151	0.152412	0.344489	1	22	tags=10%, list=0%, signal=10%
SIGNALING EVENTS MEDIATED BY PTP1B%PATHWAY INTERACTION DATABASE NCI-NATURE CURATED DATA%SIGNALING EVENTS MEDIATED BY PTP1B	38	0.448407	1.32195	0.0974771	0.358844	1	430	tags=8%, list=4%, signal=8%
PID_HES_HEY_PATHWAY%MSIGDB_C2%PID_HES_HEY_PATHWAY	38	0.449035	1.32179	0.101675	0.357573	1	725	tags=11%, list=6%, signal=11%
GENE AND PROTEIN EXPRESSION BY JAK-STAT SIGNALING AFTER INTERLEUKIN-12 STIMULATION%REACTOME%R-HSA-8950505.3	26	0.482996	1.32059	0.121143	0.358028	1	2792	tags=42%, list=24%, signal=55%
PID_HNF3B_PATHWAY%MSIGDB_C2%PID_HNF3B_PATHWAY	30	0.466698	1.32025	0.11851	0.357093	1	798	tags=20%, list=7%, signal=21%
NOTCH-MEDIATED HES HEY NETWORK%PATHWAY INTERACTION DATABASE NCI-NATURE CURATED DATA%NOTCH-MEDIATED HES HEY NETWORK	37	0.452672	1.32006	0.109541	0.355878	1	725	tags=11%, list=6%, signal=11%
FATTY ACID OXIDATION%WIKIPATHWAYS_20201110%WP2318%MUS MUSCULUS	10	0.606948	1.31966	0.141929	0.355048	1	3381	tags=60%, list=29%, signal=84%
PDGFR-BETA SIGNALING PATHWAY%PATHWAY INTERACTION DATABASE NCI-NATURE CURATED DATA%PDGFR-BETA SIGNALING PATHWAY	110	0.375455	1.31848	0.0741758	0.355541	1	911	tags=12%, list=8%, signal=13%
SIGNALING BY INTERLEUKINS%REACTOME%R-HSA-449147.11	319	0.32745	1.31099	0.0216216	0.366804	1	1226	tags=13%, list=10%, signal=15%
PID_PDGFRB_PATHWAY%MSIGDB_C2%PID_PDGFRB_PATHWAY	113	0.370152	1.30238	0.0803815	0.380376	1	911	tags=12%, list=8%, signal=12%
MITOPHAGY%REACTOME%R-HSA-5205647.4	20	0.508159	1.30092	0.147948	0.381357	1	2450	tags=40%, list=21%, signal=51%
FOXA2 AND FOXA3 TRANSCRIPTION FACTOR NETWORKS%PATHWAY INTERACTION DATABASE NCI-NATURE CURATED DATA%FOXA2 AND FOXA3 TRANSCRIPTION FACTOR NETWORKS	30	0.466698	1.2982	0.153664	0.384533	1	798	tags=20%, list=7%, signal=21%
GPCR LIGAND BINDING%REACTOME%R-HSA-500792.3	116	0.367057	1.29648	0.0747126	0.385924	1	1942	tags=27%, list=17%, signal=32%
METABOLISM OF FAT-SOLUBLE VITAMINS%REACTOME%R-HSA-6806667.5	31	0.457493	1.29222	0.137278	0.391985	1	776	tags=19%, list=7%, signal=21%
PID_TCR_JNK_PATHWAY%MSIGDB_C2%PID_TCR_JNK_PATHWAY	13	0.550063	1.28923	0.162791	0.395796	1	3482	tags=62%, list=30%, signal=88%
GLYCOGEN STORAGE DISEASES%REACTOME%R-HSA-3229121.2	11	0.565857	1.28876	0.194143	0.394938	1	478	tags=18%, list=4%, signal=19%
IL3-MEDIATED SIGNALING EVENTS%PATHWAY INTERACTION DATABASE NCI-NATURE CURATED DATA%IL3-MEDIATED SIGNALING EVENTS	23	0.482157	1.28264	0.141111	0.404366	1	1138	tags=17%, list=10%, signal=19%
BIOCARTA_VIP_PATHWAY%MSIGDB_C2%BIOCARTA_VIP_PATHWAY	19	0.503348	1.28218	0.165563	0.403555	1	2165	tags=37%, list=19%, signal=45%
JNK SIGNALING IN THE CD4+ TCR PATHWAY%PATHWAY INTERACTION DATABASE NCI-NATURE CURATED DATA%JNK SIGNALING IN THE CD4+ TCR PATHWAY	13	0.550063	1.28041	0.179348	0.405133	1	3482	tags=62%, list=30%, signal=88%
BIOCARTA_IL12_PATHWAY%MSIGDB_C2%BIOCARTA_IL12_PATHWAY	13	0.54018	1.28011	0.173777	0.404011	1	801	tags=23%, list=7%, signal=25%
ESC PLURIPOTENCY PATHWAYS%WIKIPATHWAYS_20201110%WP339%MUS MUSCULUS	68	0.387398	1.27812	0.115979	0.405957	1	1151	tags=13%, list=10%, signal=15%
HEPARAN SULFATE HEPARIN (HS-GAG) METABOLISM%REACTOME DATABASE ID RELEASE 74%1638091	32	0.44815	1.27448	0.136364	0.411067	1	453	tags=13%, list=4%, signal=13%
ACTIVATION OF MATRIX METALLOPROTEINASES%REACTOME%R-HSA-1592389.1	14	0.53398	1.27127	0.184444	0.415322	1	3319	tags=50%, list=28%, signal=70%
PID_IL3_PATHWAY%MSIGDB_C2%PID_IL3_PATHWAY	24	0.469354	1.27116	0.164811	0.413916	1	1138	tags=17%, list=10%, signal=18%
CELL-CELL COMMUNICATION%REACTOME%R-HSA-1500931.4	62	0.391278	1.26724	0.120301	0.419642	1	825	tags=18%, list=7%, signal=19%
OXIDATIVE DAMAGE%WIKIPATHWAYS_20201110%WP1496%MUS MUSCULUS	35	0.434781	1.26074	0.152074	0.430411	1	827	tags=17%, list=7%, signal=18%
REGULATION OF RUNX2 EXPRESSION AND ACTIVITY%REACTOME DATABASE ID RELEASE 74%8939902	58	0.399955	1.25822	0.122762	0.433623	1	582	tags=9%, list=5%, signal=9%
DEATH RECEPTOR SIGNALLING%REACTOME%R-HSA-73887.4	107	0.352671	1.2572	0.110949	0.434013	1	2326	tags=28%, list=20%, signal=35%
PID_HNF3A_PATHWAY%MSIGDB_C2%PID_HNF3A_PATHWAY	25	0.455762	1.2503	0.180556	0.445578	1	868	tags=28%, list=7%, signal=30%
CHONDROITIN SULFATE DERMATAN SULFATE METABOLISM%REACTOME%R-HSA-1793185.1	31	0.43696	1.24756	0.1691	0.449204	1	738	tags=10%, list=6%, signal=10%
APOPTOSIS%WIKIPATHWAYS_20201110%WP1254%MUS MUSCULUS	63	0.384218	1.24751	0.130155	0.447587	1	929	tags=13%, list=8%, signal=14%
TRNA MODIFICATION IN THE NUCLEUS AND CYTOSOL%REACTOME%R-HSA-6782315.5	37	0.43229	1.24363	0.158019	0.453423	1	1333	tags=16%, list=11%, signal=18%
BIOCARTA_CASPASE_PATHWAY%MSIGDB_C2%BIOCARTA_CASPASE_PATHWAY	16	0.504581	1.24285	0.210884	0.45324	1	2326	tags=50%, list=20%, signal=62%
ACTIVATED NOTCH1 TRANSMITS SIGNAL TO THE NUCLEUS%REACTOME%R-HSA-2122948.2	22	0.468226	1.23913	0.182857	0.458725	1	412	tags=14%, list=4%, signal=14%
PLASMA LIPOPROTEIN ASSEMBLY%REACTOME%R-HSA-8963898.1	15	0.513974	1.23823	0.205298	0.458857	1	758	tags=20%, list=6%, signal=21%
FOXO-MEDIATED TRANSCRIPTION OF CELL CYCLE GENES%REACTOME DATABASE ID RELEASE 74%9617828	14	0.521761	1.23186	0.200893	0.469948	1	2460	tags=50%, list=21%, signal=63%
HALLMARK_ADIPOGENESIS%MSIGDB_C2%HALLMARK_ADIPOGENESIS	168	0.329593	1.23179	0.0913044	0.468349	1	2373	tags=25%, list=20%, signal=31%
SEMA4D INDUCED CELL MIGRATION AND GROWTH-CONE COLLAPSE%REACTOME DATABASE ID RELEASE 74%416572	18	0.485171	1.22787	0.221597	0.474375	1	1319	tags=39%, list=11%, signal=44%
RAS PATHWAY%PANTHER PATHWAY%P04393	63	0.378083	1.22615	0.146192	0.476163	1	195	tags=3%, list=2%, signal=3%
HALLMARK_TNFA_SIGNALING_VIA_NFKB%MSIGDB_C2%HALLMARK_TNFA_SIGNALING_VIA_NFKB	168	0.328123	1.22135	0.112376	0.484261	1	1104	tags=13%, list=9%, signal=14%
NRAGE SIGNALS DEATH THROUGH JNK%REACTOME%R-HSA-193648.1	45	0.401665	1.22077	0.180072	0.483663	1	3501	tags=47%, list=30%, signal=66%
FOXA1 TRANSCRIPTION FACTOR NETWORK%PATHWAY INTERACTION DATABASE NCI-NATURE CURATED DATA%FOXA1 TRANSCRIPTION FACTOR NETWORK	25	0.455762	1.22006	0.205882	0.483297	1	868	tags=28%, list=7%, signal=30%
SYNTHESIS OF PIPS AT THE PLASMA MEMBRANE%REACTOME DATABASE ID RELEASE 74%1660499	41	0.407576	1.21633	0.16707	0.489135	1	2235	tags=29%, list=19%, signal=36%
HALLMARK_REACTIVE_OXIGEN_SPECIES_PATHWAY%MSIGDB_C2%HALLMARK_REACTIVE_OXIGEN_SPECIES_PATHWAY	42	0.403518	1.2148	0.173124	0.490572	1	1705	tags=31%, list=15%, signal=36%
SIGNAL REGULATORY PROTEIN FAMILY INTERACTIONS%REACTOME%R-HSA-391160.2	10	0.55197	1.21389	0.253684	0.490717	1	627	tags=30%, list=5%, signal=32%
SEMA4D IN SEMAPHORIN SIGNALING%REACTOME%R-HSA-400685.2	22	0.459135	1.21325	0.204289	0.490153	1	1675	tags=41%, list=14%, signal=48%
BIOCARTA_MAPK_PATHWAY%MSIGDB_C2%BIOCARTA_MAPK_PATHWAY	75	0.36673	1.21292	0.146597	0.489108	1	1262	tags=16%, list=11%, signal=18%
BIOCARTA_SHH_PATHWAY%MSIGDB_C2%BIOCARTA_SHH_PATHWAY	12	0.525353	1.21075	0.250804	0.491741	1	3545	tags=50%, list=30%, signal=72%
SIGNALING EVENTS MEDIATED BY HDAC CLASS I%PATHWAY INTERACTION DATABASE NCI-NATURE CURATED DATA%SIGNALING EVENTS MEDIATED BY HDAC CLASS I	58	0.376338	1.21052	0.15889	0.490473	1	1059	tags=17%, list=9%, signal=19%
SPLICING FACTOR NOVA REGULATED SYNAPTIC PROTEINS%WIKIPATHWAYS_20201110%WP1983%MUS MUSCULUS	22	0.455394	1.20877	0.198385	0.492449	1	850	tags=18%, list=7%, signal=20%
RHO GTPASE CYCLE%REACTOME%R-HSA-194840.4	104	0.34495	1.20699	0.15884	0.494373	1	2674	tags=32%, list=23%, signal=41%
BIOCARTA_TNFR1_PATHWAY%MSIGDB_C2%BIOCARTA_TNFR1_PATHWAY	28	0.43763	1.20409	0.20331	0.498821	1	2264	tags=32%, list=19%, signal=40%
PID_HDAC_CLASSI_PATHWAY%MSIGDB_C2%PID_HDAC_CLASSI_PATHWAY	58	0.374371	1.20116	0.170025	0.503022	1	1059	tags=17%, list=9%, signal=19%
APOPTOTIC EXECUTION PHASE%REACTOME DATABASE ID RELEASE 74%75153	32	0.424197	1.19805	0.207872	0.507779	1	2076	tags=41%, list=18%, signal=49%
O-GLYCOSYLATION OF TSR DOMAIN-CONTAINING PROTEINS%REACTOME DATABASE ID RELEASE 74%5173214	14	0.50267	1.19689	0.240449	0.508434	1	403	tags=14%, list=3%, signal=15%
BIOCARTA_ETC_PATHWAY%MSIGDB_C2%BIOCARTA_ETC_PATHWAY	10	0.539165	1.19379	0.28556	0.513313	1	2111	tags=40%, list=18%, signal=49%
XBP1(S) ACTIVATES CHAPERONE GENES%REACTOME DATABASE ID RELEASE 74%381038	44	0.386256	1.19232	0.170984	0.514624	1	1631	tags=23%, list=14%, signal=26%
SIGNALING BY NOTCH%REACTOME%R-HSA-157118.5	144	0.328617	1.19192	0.142438	0.513691	1	801	tags=8%, list=7%, signal=8%
WNT5A-DEPENDENT INTERNALIZATION OF FZD4%REACTOME DATABASE ID RELEASE 74%5099900	13	0.509696	1.19114	0.251892	0.513553	1	3128	tags=69%, list=27%, signal=94%
HALLMARK_INTERFERON_ALPHA_RESPONSE%MSIGDB_C2%HALLMARK_INTERFERON_ALPHA_RESPONSE	82	0.352574	1.18686	0.144168	0.52085	1	1278	tags=16%, list=11%, signal=18%
PYRUVATE METABOLISM%REACTOME%R-HSA-70268.6	25	0.437428	1.18524	0.222349	0.522531	1	1809	tags=28%, list=15%, signal=33%
PID_RHOA_PATHWAY%MSIGDB_C2%PID_RHOA_PATHWAY	31	0.412709	1.18448	0.210526	0.522338	1	2289	tags=29%, list=20%, signal=36%
DEFECTIVE B3GALTL CAUSES PETERS-PLUS SYNDROME (PPS)%REACTOME DATABASE ID RELEASE 74%5083635	13	0.511401	1.18391	0.263383	0.521771	1	403	tags=15%, list=3%, signal=16%
DEGRADATION OF BETA CATENIN%PATHWAY INTERACTION DATABASE NCI-NATURE CURATED DATA%DEGRADATION OF BETA CATENIN	14	0.498845	1.18272	0.252155	0.522577	1	2071	tags=43%, list=18%, signal=52%
HALLMARK_ESTROGEN_RESPONSE_EARLY%MSIGDB_C2%HALLMARK_ESTROGEN_RESPONSE_EARLY	136	0.321668	1.18119	0.156385	0.524038	1	2186	tags=24%, list=19%, signal=29%
HALLMARK_IL2_STAT5_SIGNALING%MSIGDB_C2%HALLMARK_IL2_STAT5_SIGNALING	153	0.320659	1.17652	0.154446	0.532173	1	1600	tags=18%, list=14%, signal=21%
PID_S1P_META_PATHWAY%MSIGDB_C2%PID_S1P_META_PATHWAY	14	0.481078	1.16372	0.284258	0.558762	1	62	tags=7%, list=1%, signal=7%
ALZHEIMER DISEASE-PRESENILIN PATHWAY%PANTHER PATHWAY%P00004	59	0.358808	1.16209	0.204485	0.560556	1	2071	tags=31%, list=18%, signal=37%
RHOA SIGNALING PATHWAY%PATHWAY INTERACTION DATABASE NCI-NATURE CURATED DATA%RHOA SIGNALING PATHWAY	31	0.412709	1.15907	0.247664	0.565429	1	2289	tags=29%, list=20%, signal=36%
PID_BETA_CATENIN_DEG_PATHWAY%MSIGDB_C2%PID_BETA_CATENIN_DEG_PATHWAY	14	0.483943	1.15896	0.280874	0.563794	1	2071	tags=43%, list=18%, signal=52%
PEPTIDE LIGAND-BINDING RECEPTORS%REACTOME%R-HSA-375276.5	50	0.37647	1.15736	0.224367	0.565467	1	1942	tags=24%, list=17%, signal=29%
RAF MAP KINASE CASCADE%REACTOME%R-HSA-5673001.10	187	0.305173	1.15661	0.175573	0.56529	1	582	tags=7%, list=5%, signal=7%
CANONICAL NF-KAPPAB PATHWAY%PATHWAY INTERACTION DATABASE NCI-NATURE CURATED DATA%CANONICAL NF-KAPPAB PATHWAY	21	0.442922	1.15582	0.253664	0.565177	1	929	tags=19%, list=8%, signal=21%
ERK1 ERK2 PATHWAY%REACTOME%R-HSA-5684996.4	191	0.306212	1.15304	0.16879	0.569561	1	582	tags=7%, list=5%, signal=8%
PID_NFKAPPAB_CANONICAL_PATHWAY%MSIGDB_C2%PID_NFKAPPAB_CANONICAL_PATHWAY	21	0.438922	1.15297	0.280269	0.567841	1	929	tags=19%, list=8%, signal=21%
RETINOL METABOLISM%WIKIPATHWAYS_20201110%WP1259%MUS MUSCULUS	20	0.449924	1.15163	0.252809	0.569031	1	1964	tags=20%, list=17%, signal=24%
TBC RABGAPS%REACTOME DATABASE ID RELEASE 74%8854214	39	0.386614	1.1502	0.224691	0.57039	1	1057	tags=26%, list=9%, signal=28%
CELL-CELL JUNCTION ORGANIZATION%REACTOME DATABASE ID RELEASE 74%421270	15	0.477169	1.14984	0.301969	0.569351	1	2383	tags=40%, list=20%, signal=50%
BIOCARTA_HSP27_PATHWAY%MSIGDB_C2%BIOCARTA_HSP27_PATHWAY	10	0.515179	1.14953	0.299003	0.568179	1	1467	tags=30%, list=13%, signal=34%
REGULATION OF RHOA ACTIVITY%PATHWAY INTERACTION DATABASE NCI-NATURE CURATED DATA%REGULATION OF RHOA ACTIVITY	37	0.391692	1.14875	0.248864	0.568047	1	1442	tags=22%, list=12%, signal=25%
BIOCARTA_ARAP_PATHWAY%MSIGDB_C2%BIOCARTA_ARAP_PATHWAY	17	0.465342	1.14785	0.294804	0.568303	1	4936	tags=82%, list=42%, signal=142%
PID_RHOA_REG_PATHWAY%MSIGDB_C2%PID_RHOA_REG_PATHWAY	37	0.391692	1.14695	0.260663	0.568539	1	1442	tags=22%, list=12%, signal=25%
CHEMOKINE RECEPTORS BIND CHEMOKINES%REACTOME DATABASE ID RELEASE 74%380108	24	0.436358	1.14617	0.264672	0.568527	1	1942	tags=25%, list=17%, signal=30%
MITOCHONDRIAL FATTY ACID BETA-OXIDATION OF SATURATED FATTY ACIDS%REACTOME%R-HSA-77286.2	10	0.520149	1.1452	0.29753	0.568924	1	3702	tags=70%, list=32%, signal=102%
RAB REGULATION OF TRAFFICKING%REACTOME DATABASE ID RELEASE 74%9007101	105	0.325424	1.14348	0.198932	0.570922	1	1064	tags=17%, list=9%, signal=19%
FATTY ACID METABOLISM%REACTOME DATABASE ID RELEASE 74%8978868	126	0.318071	1.14311	0.194858	0.569916	1	2978	tags=31%, list=25%, signal=41%
TRAF6 MEDIATED NF-KB ACTIVATION%REACTOME%R-HSA-933542.1	20	0.442035	1.13954	0.28223	0.576165	1	2138	tags=45%, list=18%, signal=55%
SPHINGOSINE 1-PHOSPHATE (S1P) PATHWAY%PATHWAY INTERACTION DATABASE NCI-NATURE CURATED DATA%SPHINGOSINE 1-PHOSPHATE (S1P) PATHWAY	14	0.481078	1.13811	0.302587	0.577614	1	62	tags=7%, list=1%, signal=7%
METALLOPROTEASE DUBS%REACTOME%R-HSA-5689901.2	13	0.487018	1.13268	0.307281	0.588069	1	868	tags=31%, list=7%, signal=33%
IRE1ALPHA ACTIVATES CHAPERONES%REACTOME DATABASE ID RELEASE 74%381070	46	0.371697	1.13196	0.255066	0.587891	1	1631	tags=22%, list=14%, signal=25%
ERBB1 DOWNSTREAM SIGNALING%PATHWAY INTERACTION DATABASE NCI-NATURE CURATED DATA%ERBB1 DOWNSTREAM SIGNALING	92	0.333543	1.12918	0.221311	0.592388	1	925	tags=11%, list=8%, signal=12%
PID_ERBB1_DOWNSTREAM_PATHWAY%MSIGDB_C2%PID_ERBB1_DOWNSTREAM_PATHWAY	94	0.330998	1.12894	0.236735	0.591139	1	925	tags=11%, list=8%, signal=11%
ENDOGENOUS TLR SIGNALING%PATHWAY INTERACTION DATABASE NCI-NATURE CURATED DATA%ENDOGENOUS TLR SIGNALING	20	0.433122	1.12361	0.300223	0.601556	1	679	tags=10%, list=6%, signal=11%
BIOCARTA_GH_PATHWAY%MSIGDB_C2%BIOCARTA_GH_PATHWAY	23	0.42562	1.12224	0.295249	0.60293	1	146	tags=9%, list=1%, signal=9%
FOLIC ACID NETWORK%WIKIPATHWAYS_20201110%WP1273%MUS MUSCULUS	17	0.449404	1.11922	0.306306	0.608248	1	2833	tags=35%, list=24%, signal=47%
1D-<I>MYO< I>-INOSITOL HEXAKISPHOSPHATE BIOSYNTHESIS II (MAMMALIAN)%HUMANCYC%PWY-6362	14	0.477538	1.11397	0.329978	0.618772	1	2182	tags=50%, list=19%, signal=61%
NEPHRIN FAMILY INTERACTIONS%REACTOME%R-HSA-373753.3	19	0.43153	1.11283	0.299107	0.619567	1	2136	tags=32%, list=18%, signal=39%
MAPK FAMILY SIGNALING CASCADES%REACTOME DATABASE ID RELEASE 74%5683057	218	0.288755	1.10994	0.225552	0.624548	1	715	tags=8%, list=6%, signal=8%
TCR%NETPATH%TCR	214	0.290451	1.10785	0.218487	0.627551	1	1360	tags=16%, list=12%, signal=18%
DISEASES OF CARBOHYDRATE METABOLISM%REACTOME%R-HSA-5663084.3	27	0.397133	1.10668	0.323245	0.628446	1	576	tags=11%, list=5%, signal=12%
BCR%NETPATH%BCR	134	0.306811	1.10587	0.236256	0.628444	1	929	tags=12%, list=8%, signal=13%
TRIGLYCERIDE METABOLISM%REACTOME DATABASE ID RELEASE 74%8979227	20	0.426448	1.10522	0.342105	0.628274	1	963	tags=15%, list=8%, signal=16%
DECTIN-2 FAMILY%REACTOME%R-HSA-5621480.3	10	0.502125	1.10417	0.356457	0.628857	1	2413	tags=40%, list=21%, signal=50%
NOTCH2 ACTIVATION AND TRANSMISSION OF SIGNAL TO THE NUCLEUS%REACTOME%R-HSA-2979096.1	14	0.464628	1.10355	0.326111	0.628398	1	2354	tags=43%, list=20%, signal=54%
PEROXISOMAL PROTEIN IMPORT%REACTOME%R-HSA-9033241.3	50	0.35785	1.10281	0.276269	0.628243	1	2311	tags=28%, list=20%, signal=35%
RETINOID METABOLISM AND TRANSPORT%REACTOME DATABASE ID RELEASE 74%975634	27	0.391863	1.10241	0.326835	0.627382	1	758	tags=15%, list=6%, signal=16%
NEPHRIN NEPH1 SIGNALING IN THE KIDNEY PODOCYTE%PATHWAY INTERACTION DATABASE NCI-NATURE CURATED DATA%NEPHRIN NEPH1 SIGNALING IN THE KIDNEY PODOCYTE	22	0.419972	1.10153	0.316647	0.627658	1	850	tags=23%, list=7%, signal=24%
GLYCEROLIPIDS AND GLYCEROPHOSPHOLIPIDS%WIKIPATHWAYS_20201110%WP4345%MUS MUSCULUS	17	0.436448	1.10133	0.331849	0.626281	1	2635	tags=41%, list=23%, signal=53%
BIOCARTA_CARM_ER_PATHWAY%MSIGDB_C2%BIOCARTA_CARM_ER_PATHWAY	29	0.393088	1.1008	0.306452	0.625607	1	868	tags=17%, list=7%, signal=19%
BIOCARTA_NUCLEARRS_PATHWAY%MSIGDB_C2%BIOCARTA_NUCLEARRS_PATHWAY	13	0.468343	1.10046	0.349892	0.62454	1	1862	tags=23%, list=16%, signal=27%
PID_PI3KCI_PATHWAY%MSIGDB_C2%PID_PI3KCI_PATHWAY	41	0.368017	1.09707	0.277443	0.630682	1	2289	tags=27%, list=20%, signal=33%
INOSITOL PHOSPHATE METABOLISM%REACTOME DATABASE ID RELEASE 74%1483249	34	0.37884	1.0969	0.305425	0.629236	1	2811	tags=38%, list=24%, signal=50%
TRP CHANNELS%REACTOME DATABASE ID RELEASE 74%3295583	11	0.488772	1.0957	0.359914	0.630249	1	3297	tags=55%, list=28%, signal=76%
CELL DEATH SIGNALLING VIA NRAGE, NRIF AND NADE%REACTOME DATABASE ID RELEASE 74%204998	55	0.346843	1.09366	0.293282	0.633212	1	2183	tags=29%, list=19%, signal=36%
FOXO FAMILY SIGNALING%PATHWAY INTERACTION DATABASE NCI-NATURE CURATED DATA%FOXO FAMILY SIGNALING	45	0.353767	1.0925	0.289409	0.634119	1	1232	tags=24%, list=11%, signal=27%
HEDGEHOG SIGNALING PATHWAY%PANTHER PATHWAY%P00025	16	0.439579	1.09235	0.361798	0.63266	1	3655	tags=44%, list=31%, signal=64%
NOTCH3 ACTIVATION AND TRANSMISSION OF SIGNAL TO THE NUCLEUS%REACTOME DATABASE ID RELEASE 74%9013507	17	0.443913	1.09185	0.343445	0.631996	1	84	tags=12%, list=1%, signal=12%
NABA_MATRISOME_ASSOCIATED%MSIGDB_C2%NABA_MATRISOME_ASSOCIATED	265	0.277073	1.09182	0.235974	0.630253	1	2082	tags=21%, list=18%, signal=25%
TYROBP CAUSAL NETWORK%WIKIPATHWAYS_20201110%WP3625%MUS MUSCULUS	52	0.345678	1.09173	0.292419	0.628687	1	551	tags=8%, list=5%, signal=8%
SIGNALING BY RAF1 MUTANTS%REACTOME%R-HSA-9656223.1	31	0.388606	1.09148	0.327566	0.62744	1	158	tags=10%, list=1%, signal=10%
CLASS I PI3K SIGNALING EVENTS%PATHWAY INTERACTION DATABASE NCI-NATURE CURATED DATA%CLASS I PI3K SIGNALING EVENTS	37	0.366407	1.08787	0.31358	0.634144	1	1195	tags=16%, list=10%, signal=18%
RHO GTPASES ACTIVATE PAKS%REACTOME%R-HSA-5627123.2	15	0.445	1.08723	0.352285	0.633812	1	1076	tags=33%, list=9%, signal=37%
FOCAL ADHESION-PI3K-AKT-MTOR-SIGNALING PATHWAY%WIKIPATHWAYS_20201110%WP2841%MUS MUSCULUS	207	0.284914	1.08708	0.252366	0.632399	1	554	tags=6%, list=5%, signal=6%
STRIATED MUSCLE CONTRACTION%REACTOME%R-HSA-390522.1	13	0.467345	1.08693	0.35262	0.630969	1	35	tags=8%, list=0%, signal=8%
PID_FOXO_PATHWAY%MSIGDB_C2%PID_FOXO_PATHWAY	45	0.353767	1.08568	0.296296	0.632164	1	1232	tags=24%, list=11%, signal=27%
TGF-BETA RECEPTOR SIGNALING IN EMT (EPITHELIAL TO MESENCHYMAL TRANSITION)%REACTOME DATABASE ID RELEASE 74%2173791	13	0.467403	1.08406	0.361538	0.634183	1	2289	tags=31%, list=20%, signal=38%
BIOTIN TRANSPORT AND METABOLISM%REACTOME DATABASE ID RELEASE 74%196780	11	0.483194	1.08306	0.376749	0.634783	1	2029	tags=36%, list=17%, signal=44%
PID_TOLL_ENDOGENOUS_PATHWAY%MSIGDB_C2%PID_TOLL_ENDOGENOUS_PATHWAY	21	0.412871	1.08213	0.353428	0.635192	1	2495	tags=29%, list=21%, signal=36%
BIOCARTA_PAR1_PATHWAY%MSIGDB_C2%BIOCARTA_PAR1_PATHWAY	28	0.388172	1.07975	0.330654	0.639086	1	3624	tags=54%, list=31%, signal=77%
GLYCOSPHINGOLIPID METABOLISM%REACTOME%R-HSA-1660662.5	31	0.370875	1.07833	0.324387	0.640606	1	3537	tags=35%, list=30%, signal=51%
WNT SIGNALING IN KIDNEY DISEASE%WIKIPATHWAYS_20201110%WP3857%MUS MUSCULUS	26	0.392892	1.07714	0.346651	0.641623	1	3482	tags=54%, list=30%, signal=76%
EGF RECEPTOR SIGNALING PATHWAY%PANTHER PATHWAY%P00018	89	0.315103	1.07696	0.303665	0.640304	1	1	tags=1%, list=0%, signal=1%
RAB GEFS EXCHANGE GTP FOR GDP ON RABS%REACTOME DATABASE ID RELEASE 74%8876198	76	0.32039	1.0769	0.298547	0.638702	1	2247	tags=28%, list=19%, signal=34%
PEROXISOMAL LIPID METABOLISM%REACTOME%R-HSA-390918.5	21	0.411506	1.07265	0.352941	0.646997	1	3055	tags=38%, list=26%, signal=51%
PID_NEPHRIN_NEPH1_PATHWAY%MSIGDB_C2%PID_NEPHRIN_NEPH1_PATHWAY	24	0.398073	1.07063	0.365629	0.649996	1	850	tags=21%, list=7%, signal=22%
WNT SIGNALING NETWORK%PATHWAY INTERACTION DATABASE NCI-NATURE CURATED DATA%WNT SIGNALING NETWORK	13	0.448749	1.06915	0.378378	0.651734	1	1151	tags=31%, list=10%, signal=34%
RHO GTPASES ACTIVATE ROCKS%REACTOME%R-HSA-5627117.3	16	0.43602	1.06843	0.387387	0.651739	1	1113	tags=31%, list=10%, signal=34%
3-PHOSPHOINOSITIDE DEGRADATION%HUMANCYC%PWY-6368	15	0.441888	1.0662	0.39207	0.655371	1	2182	tags=53%, list=19%, signal=65%
PARADOXICAL ACTIVATION OF RAF SIGNALING BY KINASE INACTIVE BRAF%REACTOME%R-HSA-6802955.2	36	0.357699	1.06371	0.321386	0.659492	1	158	tags=8%, list=1%, signal=8%
TRANSCRIPTIONAL REGULATION BY MECP2%REACTOME%R-HSA-8986944.2	37	0.360648	1.0628	0.348033	0.659891	1	3051	tags=38%, list=26%, signal=51%
METABOLISM OF COFACTORS%REACTOME%R-HSA-8978934.3	15	0.438859	1.06269	0.375	0.658421	1	1601	tags=27%, list=14%, signal=31%
CARDIAC CONDUCTION%REACTOME DATABASE ID RELEASE 74%5576891	45	0.338063	1.0598	0.338462	0.663631	1	1628	tags=18%, list=14%, signal=21%
NABA_MATRISOME%MSIGDB_C2%NABA_MATRISOME	336	0.262803	1.05506	0.299242	0.673086	1	2092	tags=20%, list=18%, signal=24%
O-LINKED GLYCOSYLATION%REACTOME%R-HSA-5173105.4	48	0.341347	1.05493	0.348371	0.671613	1	1378	tags=21%, list=12%, signal=24%
SIGNALING BY RAS MUTANTS%REACTOME%R-HSA-6802949.2	36	0.357699	1.05278	0.351351	0.675056	1	158	tags=8%, list=1%, signal=8%
BIOCARTA_MYOSIN_PATHWAY%MSIGDB_C2%BIOCARTA_MYOSIN_PATHWAY	24	0.388361	1.05146	0.375423	0.676526	1	3611	tags=54%, list=31%, signal=78%
PLASMINOGEN ACTIVATING CASCADE%PANTHER PATHWAY%P00050	11	0.460473	1.05145	0.4	0.674756	1	1051	tags=18%, list=9%, signal=20%
P75 NTR RECEPTOR-MEDIATED SIGNALLING%REACTOME%R-HSA-193704.1	72	0.313333	1.05098	0.327609	0.674152	1	2289	tags=31%, list=20%, signal=38%
SIDS SUSCEPTIBILITY PATHWAYS%WIKIPATHWAYS_20201110%WP1266%MUS MUSCULUS	31	0.372976	1.04732	0.386496	0.681365	1	354	tags=10%, list=3%, signal=10%
PID_WNT_SIGNALING_PATHWAY%MSIGDB_C2%PID_WNT_SIGNALING_PATHWAY	13	0.448749	1.04671	0.402186	0.681042	1	1151	tags=31%, list=10%, signal=34%
SIGNALING DOWNSTREAM OF RAS MUTANTS%REACTOME%R-HSA-9649948.1	36	0.357699	1.04414	0.36019	0.685383	1	158	tags=8%, list=1%, signal=8%
PI3 KINASE PATHWAY%PANTHER PATHWAY%P00048	37	0.354922	1.04377	0.386905	0.684569	1	324	tags=8%, list=3%, signal=8%
PID_S1P_S1P3_PATHWAY%MSIGDB_C2%PID_S1P_S1P3_PATHWAY	23	0.395021	1.04363	0.398618	0.683109	1	62	tags=9%, list=1%, signal=9%
REGULATION OF RAS FAMILY ACTIVATION%PATHWAY INTERACTION DATABASE NCI-NATURE CURATED DATA%REGULATION OF RAS FAMILY ACTIVATION	25	0.382281	1.04059	0.36694	0.688791	1	739	tags=16%, list=6%, signal=17%
PID_AJDISS_2PATHWAY%MSIGDB_C2%PID_AJDISS_2PATHWAY	35	0.361923	1.03858	0.383055	0.692007	1	626	tags=14%, list=5%, signal=15%
SIGNALING BY MODERATE KINASE ACTIVITY BRAF MUTANTS%REACTOME DATABASE ID RELEASE 74%6802946	36	0.357699	1.03851	0.368231	0.69038	1	158	tags=8%, list=1%, signal=8%
POSTTRANSLATIONAL REGULATION OF ADHERENS JUNCTION STABILITY AND DISSASSEMBLY%PATHWAY INTERACTION DATABASE NCI-NATURE CURATED DATA%POSTTRANSLATIONAL REGULATION OF ADHERENS JUNCTION STABILITY AND DISSASSEMBLY	35	0.361923	1.03836	0.383255	0.688935	1	626	tags=14%, list=5%, signal=15%
RAS ACTIVATION UPON CA2+ INFLUX THROUGH NMDA RECEPTOR%REACTOME%R-HSA-442982.3	10	0.468306	1.03809	0.429688	0.687814	1	4062	tags=60%, list=35%, signal=92%
CYTOSOLIC SULFONATION OF SMALL MOLECULES%REACTOME%R-HSA-156584.3	11	0.460403	1.03781	0.419209	0.686766	1	3431	tags=36%, list=29%, signal=51%
PURINE CATABOLISM%REACTOME%R-HSA-74259.3	12	0.456174	1.03672	0.427933	0.687635	1	1207	tags=25%, list=10%, signal=28%
PID_RAS_PATHWAY%MSIGDB_C2%PID_RAS_PATHWAY	25	0.382281	1.03649	0.393675	0.686504	1	739	tags=16%, list=6%, signal=17%
DISEASES OF IMMUNE SYSTEM%REACTOME DATABASE ID RELEASE 74%5260271	22	0.385032	1.03606	0.389812	0.685787	1	929	tags=14%, list=8%, signal=15%
D-<I>MYO< I>-INOSITOL-5-PHOSPHATE METABOLISM%HUMANCYC%PWY-6367	10	0.472763	1.03507	0.414951	0.686467	1	2468	tags=40%, list=21%, signal=51%
E-CADHERIN SIGNALING IN THE NASCENT ADHERENS JUNCTION%PATHWAY INTERACTION DATABASE NCI-NATURE CURATED DATA%E-CADHERIN SIGNALING IN THE NASCENT ADHERENS JUNCTION	27	0.374039	1.03395	0.391753	0.687321	1	2289	tags=26%, list=20%, signal=32%
CANONICAL WNT SIGNALING PATHWAY%PATHWAY INTERACTION DATABASE NCI-NATURE CURATED DATA%CANONICAL WNT SIGNALING PATHWAY	14	0.434083	1.03316	0.409245	0.687528	1	2071	tags=36%, list=18%, signal=43%
TRIACYLGLYCERIDE SYNTHESIS%WIKIPATHWAYS_20201110%WP386%MUS MUSCULUS	15	0.423537	1.03205	0.416393	0.688401	1	2128	tags=33%, list=18%, signal=41%
HS-GAG BIOSYNTHESIS%REACTOME DATABASE ID RELEASE 74%2022928	17	0.407501	1.03162	0.389625	0.687701	1	1825	tags=29%, list=16%, signal=35%
EGR2 AND SOX10-MEDIATED INITIATION OF SCHWANN CELL MYELINATION%REACTOME DATABASE ID RELEASE 74%9619665	18	0.403424	1.03158	0.402655	0.686072	1	2168	tags=22%, list=19%, signal=27%
PID_ECADHERIN_NASCENT_AJ_PATHWAY%MSIGDB_C2%PID_ECADHERIN_NASCENT_AJ_PATHWAY	29	0.364166	1.0314	0.407583	0.684791	1	2289	tags=28%, list=20%, signal=34%
ION HOMEOSTASIS%REACTOME%R-HSA-5578775.2	26	0.379333	1.03036	0.408027	0.685574	1	1628	tags=19%, list=14%, signal=22%
CELL JUNCTION ORGANIZATION%REACTOME%R-HSA-446728.2	34	0.350059	1.02857	0.383707	0.688182	1	2383	tags=32%, list=20%, signal=41%
DISEASES ASSOCIATED WITH THE TLR SIGNALING CASCADE%REACTOME DATABASE ID RELEASE 74%5602358	22	0.385032	1.02824	0.405797	0.687294	1	929	tags=14%, list=8%, signal=15%
FACTORS INVOLVED IN MEGAKARYOCYTE DEVELOPMENT AND PLATELET PRODUCTION%REACTOME%R-HSA-983231.2	99	0.298909	1.0271	0.357939	0.68822	1	725	tags=8%, list=6%, signal=9%
PID_WNT_CANONICAL_PATHWAY%MSIGDB_C2%PID_WNT_CANONICAL_PATHWAY	14	0.434083	1.02266	0.430851	0.697133	1	2071	tags=36%, list=18%, signal=43%
G13 SIGNALING PATHWAY%WIKIPATHWAYS_20201110%WP298%MUS MUSCULUS	28	0.36997	1.02171	0.422062	0.697796	1	941	tags=11%, list=8%, signal=12%
PEPTIDE GPCRS%WIKIPATHWAYS_20201110%WP234%MUS MUSCULUS	11	0.459508	1.021	0.419847	0.697743	1	442	tags=18%, list=4%, signal=19%
MUSCLE CONTRACTION%REACTOME DATABASE ID RELEASE 74%397014	75	0.302727	1.01438	0.410082	0.712084	1	1324	tags=15%, list=11%, signal=16%
PID_ARF6_PATHWAY%MSIGDB_C2%PID_ARF6_PATHWAY	28	0.365485	1.01354	0.402523	0.712422	1	2059	tags=32%, list=18%, signal=39%
TGF-BETA RECEPTOR SIGNALING%PATHWAY INTERACTION DATABASE NCI-NATURE CURATED DATA%TGF-BETA RECEPTOR SIGNALING	43	0.329682	1.01243	0.422983	0.713421	1	2071	tags=28%, list=18%, signal=34%
RETROGRADE NEUROTROPHIN SIGNALLING%REACTOME%R-HSA-177504.1	11	0.449875	1.0089	0.455603	0.720366	1	3128	tags=73%, list=27%, signal=99%
ARF6 SIGNALING EVENTS%PATHWAY INTERACTION DATABASE NCI-NATURE CURATED DATA%ARF6 SIGNALING EVENTS	28	0.365485	1.00814	0.449942	0.720481	1	2059	tags=32%, list=18%, signal=39%
SREBF AND MIR33 IN CHOLESTEROL AND LIPID HOMEOSTASIS%WIKIPATHWAYS_20201110%WP2084%MUS MUSCULUS	10	0.459936	1.00704	0.449944	0.721514	1	151	tags=10%, list=1%, signal=10%
PID_TGFBR_PATHWAY%MSIGDB_C2%PID_TGFBR_PATHWAY	46	0.329659	1.00467	0.421369	0.725586	1	2326	tags=30%, list=20%, signal=38%
GLUCONEOGENESIS I%HUMANCYC%GLUCONEO-PWY	17	0.401344	1.00424	0.438116	0.724893	1	2176	tags=47%, list=19%, signal=58%
AXON GUIDANCE MEDIATED BY SEMAPHORINS%PANTHER PATHWAY%P00007	16	0.406591	1.00334	0.449604	0.725409	1	641	tags=25%, list=5%, signal=26%
DEGRADATION OF THE EXTRACELLULAR MATRIX%REACTOME%R-HSA-1474228.4	52	0.319777	1.00083	0.426488	0.729817	1	2500	tags=29%, list=21%, signal=37%
BIOCARTA_TNFR2_PATHWAY%MSIGDB_C2%BIOCARTA_TNFR2_PATHWAY	16	0.407773	0.998431	0.458943	0.733935	1	1239	tags=25%, list=11%, signal=28%
MET PROMOTES CELL MOTILITY%REACTOME%R-HSA-8875878.1	20	0.3784	0.992846	0.466515	0.746135	1	1675	tags=25%, list=14%, signal=29%
SULFUR AMINO ACID METABOLISM%REACTOME%R-HSA-1614635.6	24	0.367145	0.992678	0.435152	0.744735	1	2948	tags=42%, list=25%, signal=56%
GLYCOGEN METABOLISM%WIKIPATHWAYS_20201110%WP317%MUS MUSCULUS	32	0.347496	0.991541	0.438597	0.745885	1	867	tags=16%, list=7%, signal=17%
PID_INTEGRIN_A4B1_PATHWAY%MSIGDB_C2%PID_INTEGRIN_A4B1_PATHWAY	27	0.354793	0.990832	0.459641	0.745884	1	1980	tags=26%, list=17%, signal=31%
ODORANT GPCRS%WIKIPATHWAYS_20201110%WP1397%MUS MUSCULUS	35	0.342928	0.990527	0.429426	0.744915	1	3529	tags=46%, list=30%, signal=65%
STEARATE BIOSYNTHESIS I (ANIMALS)%HUMANCYC%PWY-5972	11	0.44295	0.989987	0.468951	0.744451	1	92	tags=9%, list=1%, signal=9%
GLUCONEOGENESIS%REACTOME%R-HSA-70263.2	28	0.358788	0.989592	0.450588	0.743703	1	1917	tags=36%, list=16%, signal=43%
OMEGA-9 FA SYNTHESIS%WIKIPATHWAYS_20201110%WP4351%MUS MUSCULUS	14	0.410893	0.988955	0.472373	0.743554	1	1926	tags=29%, list=16%, signal=34%
FOXO-MEDIATED TRANSCRIPTION%REACTOME%R-HSA-9614085.2	53	0.310366	0.984729	0.44793	0.752281	1	1662	tags=26%, list=14%, signal=31%
BUDDING AND MATURATION OF HIV VIRION%REACTOME%R-HSA-162588.2	22	0.375787	0.983877	0.468894	0.752685	1	935	tags=14%, list=8%, signal=15%
REPRESSION OF WNT TARGET GENES%REACTOME%R-HSA-4641265.3	10	0.447968	0.983263	0.483696	0.752439	1	1771	tags=30%, list=15%, signal=35%
SA_CASPASE_CASCADE%MSIGDB_C2%SA_CASPASE_CASCADE	15	0.399382	0.980286	0.469163	0.758076	1	2326	tags=47%, list=20%, signal=58%
NOTCH-HLH TRANSCRIPTION PATHWAY%REACTOME%R-HSA-350054.3	25	0.361926	0.980045	0.454442	0.756936	1	1909	tags=24%, list=16%, signal=29%
SIGNALING BY NOTCH1%REACTOME%R-HSA-1980143.2	56	0.310356	0.97647	0.465923	0.76411	1	1724	tags=20%, list=15%, signal=23%
BIOCARTA_PS1_PATHWAY%MSIGDB_C2%BIOCARTA_PS1_PATHWAY	11	0.435574	0.976205	0.487013	0.763039	1	2987	tags=64%, list=26%, signal=85%
HALLMARK_COMPLEMENT%MSIGDB_C2%HALLMARK_COMPLEMENT	145	0.266657	0.975104	0.499279	0.764015	1	2586	tags=27%, list=22%, signal=34%
ALPHA4 BETA1 INTEGRIN SIGNALING EVENTS%PATHWAY INTERACTION DATABASE NCI-NATURE CURATED DATA%ALPHA4 BETA1 INTEGRIN SIGNALING EVENTS	27	0.354793	0.974707	0.476571	0.763223	1	1980	tags=26%, list=17%, signal=31%
NOTCH%IOB%NOTCH	62	0.30032	0.973134	0.442893	0.765428	1	755	tags=13%, list=6%, signal=14%
EXTRACELLULAR MATRIX ORGANIZATION%REACTOME%R-HSA-1474244.2	135	0.264082	0.972766	0.493544	0.764551	1	3397	tags=37%, list=29%, signal=52%
NOTCH%NETPATH%NOTCH	60	0.302035	0.970759	0.463145	0.767786	1	755	tags=13%, list=6%, signal=14%
CONSTITUTIVE SIGNALING BY NOTCH1 HD+PEST DOMAIN MUTANTS%REACTOME DATABASE ID RELEASE 74%2894862	44	0.313059	0.968408	0.474908	0.771977	1	1724	tags=23%, list=15%, signal=27%
KENNEDY PATHWAY%WIKIPATHWAYS_20201110%WP1771%MUS MUSCULUS	13	0.412137	0.967802	0.497812	0.771702	1	2346	tags=31%, list=20%, signal=38%
LIPOPROTEIN METABOLISM%REACTOME%R-HSA-174824.4	52	0.308084	0.967099	0.479604	0.77172	1	1312	tags=15%, list=11%, signal=17%
BIOCARTA_WNT_PATHWAY%MSIGDB_C2%BIOCARTA_WNT_PATHWAY	22	0.368961	0.964624	0.502762	0.776176	1	2071	tags=36%, list=18%, signal=44%
FLK2 FLT3%IOB%FLK2 FLT3	22	0.368394	0.962994	0.499419	0.778398	1	4	tags=5%, list=0%, signal=5%
AMINO ACID METABOLISM%WIKIPATHWAYS_20201110%WP662%MUS MUSCULUS	81	0.281404	0.962761	0.482192	0.777237	1	1975	tags=26%, list=17%, signal=31%
PID_NECTIN_PATHWAY%MSIGDB_C2%PID_NECTIN_PATHWAY	19	0.376603	0.96163	0.506091	0.778302	1	519	tags=16%, list=4%, signal=16%
MATRIX METALLOPROTEINASES%WIKIPATHWAYS_20201110%WP441%MUS MUSCULUS	14	0.405252	0.961574	0.501087	0.776708	1	2377	tags=43%, list=20%, signal=54%
TP53 REGULATES METABOLIC GENES%REACTOME DATABASE ID RELEASE 74%5628897	68	0.29286	0.96151	0.483247	0.775145	1	513	tags=12%, list=4%, signal=12%
BIOCARTA_NDKDYNAMIN_PATHWAY%MSIGDB_C2%BIOCARTA_NDKDYNAMIN_PATHWAY	13	0.403291	0.956834	0.50232	0.784974	1	1387	tags=15%, list=12%, signal=17%
EDA SIGNALLING IN HAIR FOLLICLE DEVELOPMENT%WIKIPATHWAYS_20201110%WP3652%MUS MUSCULUS	11	0.422828	0.9566	0.504219	0.78383	1	2138	tags=27%, list=18%, signal=33%
SIGNALING BY NOTCH1 IN CANCER%REACTOME%R-HSA-2644603.2	44	0.313059	0.954509	0.516089	0.787281	1	1724	tags=23%, list=15%, signal=27%
HALLMARK_HYPOXIA%MSIGDB_C2%HALLMARK_HYPOXIA	151	0.259381	0.954262	0.522273	0.786125	1	2555	tags=30%, list=22%, signal=38%
BIOCARTA_STRESS_PATHWAY%MSIGDB_C2%BIOCARTA_STRESS_PATHWAY	22	0.36342	0.953937	0.502257	0.78518	1	1239	tags=23%, list=11%, signal=25%
PID_P75_NTR_PATHWAY%MSIGDB_C2%PID_P75_NTR_PATHWAY	50	0.308315	0.95332	0.503008	0.784971	1	2377	tags=36%, list=20%, signal=45%
NABA_BASEMENT_MEMBRANES%MSIGDB_C2%NABA_BASEMENT_MEMBRANES	15	0.392089	0.953079	0.521591	0.783855	1	1251	tags=27%, list=11%, signal=30%
SIGNALING BY NOTCH2%REACTOME DATABASE ID RELEASE 74%1980145	22	0.360564	0.950304	0.511973	0.788988	1	1540	tags=18%, list=13%, signal=21%
SIGNALING BY NOTCH1 HD+PEST DOMAIN MUTANTS IN CANCER%REACTOME%R-HSA-2894858.1	44	0.313059	0.94994	0.523399	0.788133	1	1724	tags=23%, list=15%, signal=27%
P75(NTR)-MEDIATED SIGNALING%PATHWAY INTERACTION DATABASE NCI-NATURE CURATED DATA%P75(NTR)-MEDIATED SIGNALING	50	0.308315	0.947191	0.516938	0.79328	1	2377	tags=36%, list=20%, signal=45%
ORPHAN GPCRS%WIKIPATHWAYS_20201110%WP1398%MUS MUSCULUS	11	0.420166	0.946394	0.536264	0.793536	1	3988	tags=64%, list=34%, signal=96%
SIGNALING BY NOTCH1 PEST DOMAIN MUTANTS IN CANCER%REACTOME%R-HSA-2644602.1	44	0.313059	0.945291	0.512167	0.794575	1	1724	tags=23%, list=15%, signal=27%
MET ACTIVATES PTK2 SIGNALING%REACTOME%R-HSA-8874081.1	10	0.435795	0.944792	0.519523	0.794067	1	1675	tags=30%, list=14%, signal=35%
RAP1 SIGNALLING%REACTOME%R-HSA-392517.2	13	0.401344	0.94405	0.523462	0.794108	1	2970	tags=46%, list=25%, signal=62%
REGULATION OF GENE EXPRESSION IN LATE STAGE (BRANCHING MORPHOGENESIS) PANCREATIC BUD PRECURSOR CELLS%REACTOME DATABASE ID RELEASE 74%210744	11	0.41547	0.944033	0.524838	0.792429	1	598	tags=18%, list=5%, signal=19%
HEDGEHOG SIGNALING PATHWAY%WIKIPATHWAYS_20201110%WP116%MUS MUSCULUS	13	0.402348	0.942606	0.524324	0.794212	1	931	tags=23%, list=8%, signal=25%
NECTIN ADHESION PATHWAY%PATHWAY INTERACTION DATABASE NCI-NATURE CURATED DATA%NECTIN ADHESION PATHWAY	19	0.376603	0.941835	0.531915	0.794369	1	519	tags=16%, list=4%, signal=16%
TNFR2 NON-CANONICAL NF-KB PATHWAY%REACTOME%R-HSA-5668541.2	74	0.284869	0.940706	0.518331	0.795429	1	1797	tags=22%, list=15%, signal=25%
CONSTITUTIVE SIGNALING BY NOTCH1 PEST DOMAIN MUTANTS%REACTOME%R-HSA-2644606.1	44	0.313059	0.94009	0.516403	0.795201	1	1724	tags=23%, list=15%, signal=27%
BMP SIGNALING PATHWAY IN EYELID DEVELOPMENT%WIKIPATHWAYS_20201110%WP3663%MUS MUSCULUS	10	0.421454	0.938536	0.537968	0.797349	1	2638	tags=60%, list=23%, signal=77%
THROMBOPOIETIN%IOB%THROMBOPOIETIN	10	0.423203	0.938057	0.548035	0.796816	1	4	tags=10%, list=0%, signal=10%
ALPHA6-BETA4 INTEGRIN SIGNALING PATHWAY%WIKIPATHWAYS_20201110%WP488%MUS MUSCULUS	51	0.300499	0.937612	0.537649	0.796227	1	644	tags=10%, list=6%, signal=10%
HEDGEHOG SIGNALING EVENTS MEDIATED BY GLI PROTEINS%PATHWAY INTERACTION DATABASE NCI-NATURE CURATED DATA%HEDGEHOG SIGNALING EVENTS MEDIATED BY GLI PROTEINS	40	0.31301	0.936116	0.550062	0.798218	1	931	tags=23%, list=8%, signal=24%
BIOCARTA_RHO_PATHWAY%MSIGDB_C2%BIOCARTA_RHO_PATHWAY	26	0.339865	0.935149	0.541424	0.798912	1	1319	tags=23%, list=11%, signal=26%
SEMAPHORIN INTERACTIONS%REACTOME%R-HSA-373755.1	50	0.298394	0.933562	0.537353	0.801102	1	1319	tags=22%, list=11%, signal=25%
D-<I>MYO< I>-INOSITOL (1,4,5)-TRISPHOSPHATE BIOSYNTHESIS%HUMANCYC%PWY-6351	16	0.38062	0.931776	0.543919	0.803893	1	4122	tags=69%, list=35%, signal=106%
NOTCH SIGNALING PATHWAY%PATHWAY INTERACTION DATABASE NCI-NATURE CURATED DATA%NOTCH SIGNALING PATHWAY	41	0.309048	0.931329	0.540964	0.803299	1	2002	tags=24%, list=17%, signal=29%
PID_HEDGEHOG_GLI_PATHWAY%MSIGDB_C2%PID_HEDGEHOG_GLI_PATHWAY	40	0.310621	0.923866	0.600928	0.819873	1	931	tags=23%, list=8%, signal=24%
CASPASE ACTIVATION VIA EXTRINSIC APOPTOTIC SIGNALLING PATHWAY%REACTOME%R-HSA-5357769.3	20	0.357298	0.923669	0.559777	0.818628	1	1656	tags=20%, list=14%, signal=23%
WNT5A-DEPENDENT INTERNALIZATION OF FZD2, FZD5 AND ROR2%REACTOME DATABASE ID RELEASE 74%5140745	10	0.423729	0.922961	0.553814	0.818574	1	3128	tags=70%, list=27%, signal=95%
AMYLOID FIBER FORMATION%REACTOME DATABASE ID RELEASE 74%977225	33	0.324084	0.922318	0.55776	0.818473	1	1554	tags=24%, list=13%, signal=28%
NEGATIVE REGULATION OF NMDA RECEPTOR-MEDIATED NEURONAL TRANSMISSION%REACTOME DATABASE ID RELEASE 74%9617324	11	0.414792	0.921079	0.546476	0.819835	1	4062	tags=55%, list=35%, signal=83%
VISUAL PHOTOTRANSDUCTION%REACTOME DATABASE ID RELEASE 74%2187338	52	0.295811	0.920601	0.553273	0.819322	1	1964	tags=25%, list=17%, signal=30%
SURFACTANT METABOLISM%REACTOME%R-HSA-5683826.3	11	0.408604	0.919301	0.568817	0.820791	1	1657	tags=27%, list=14%, signal=32%
PRC2 METHYLATES HISTONES AND DNA%REACTOME DATABASE ID RELEASE 74%212300	15	0.377875	0.915669	0.557906	0.827926	1	4925	tags=53%, list=42%, signal=92%
DNA DOUBLE STRAND BREAK RESPONSE%REACTOME%R-HSA-5693606.1	32	0.31813	0.911831	0.562427	0.835653	1	1100	tags=19%, list=9%, signal=21%
NOTCH SIGNALING PATHWAY%WIKIPATHWAYS_20201110%WP29%MUS MUSCULUS	38	0.306522	0.911413	0.574727	0.834897	1	2238	tags=34%, list=19%, signal=42%
TRIGLYCERIDE CATABOLISM%REACTOME%R-HSA-163560.3	15	0.374304	0.90675	0.599565	0.844416	1	963	tags=13%, list=8%, signal=15%
PROTEIN LOCALIZATION%REACTOME DATABASE ID RELEASE 74%9609507	134	0.248514	0.906626	0.65	0.842993	1	2155	tags=23%, list=18%, signal=28%
PID_WNT_NONCANONICAL_PATHWAY%MSIGDB_C2%PID_WNT_NONCANONICAL_PATHWAY	25	0.334379	0.906536	0.565421	0.841502	1	2289	tags=28%, list=20%, signal=35%
PID_SYNDECAN_4_PATHWAY%MSIGDB_C2%PID_SYNDECAN_4_PATHWAY	24	0.337345	0.906262	0.568694	0.840454	1	1210	tags=21%, list=10%, signal=23%
NONCANONICAL WNT SIGNALING PATHWAY%PATHWAY INTERACTION DATABASE NCI-NATURE CURATED DATA%NONCANONICAL WNT SIGNALING PATHWAY	25	0.334379	0.902678	0.593602	0.847506	1	2289	tags=28%, list=20%, signal=35%
RECRUITMENT AND ATM-MEDIATED PHOSPHORYLATION OF REPAIR AND SIGNALING PROTEINS AT DNA DOUBLE STRAND BREAKS%REACTOME%R-HSA-5693565.2	32	0.31813	0.902651	0.592548	0.845845	1	1100	tags=19%, list=9%, signal=21%
SYNDECAN-4-MEDIATED SIGNALING EVENTS%PATHWAY INTERACTION DATABASE NCI-NATURE CURATED DATA%SYNDECAN-4-MEDIATED SIGNALING EVENTS	24	0.337345	0.900834	0.589327	0.848513	1	1210	tags=21%, list=10%, signal=23%
BIOCARTA_NOS1_PATHWAY%MSIGDB_C2%BIOCARTA_NOS1_PATHWAY	13	0.385294	0.900458	0.592308	0.847678	1	3913	tags=54%, list=33%, signal=81%
EPHB-MEDIATED FORWARD SIGNALING%REACTOME%R-HSA-3928662.2	28	0.318285	0.899969	0.573171	0.847175	1	1113	tags=18%, list=10%, signal=20%
GLUTATHIONE AND ONE CARBON METABOLISM%WIKIPATHWAYS_20201110%WP730%MUS MUSCULUS	27	0.323412	0.899719	0.582139	0.846039	1	3750	tags=63%, list=32%, signal=92%
COSTIMULATION BY THE CD28 FAMILY%REACTOME DATABASE ID RELEASE 74%388841	45	0.290956	0.899307	0.615676	0.845361	1	146	tags=4%, list=1%, signal=4%
NOTCH SIGNALING PATHWAY%PANTHER PATHWAY%P00045	23	0.337003	0.898423	0.573529	0.845739	1	1909	tags=26%, list=16%, signal=31%
DELTA-NOTCH SIGNALING PATHWAY%WIKIPATHWAYS_20201110%WP265%MUS MUSCULUS	70	0.273256	0.89783	0.630573	0.845472	1	929	tags=13%, list=8%, signal=14%
TRAF6-MEDIATED INDUCTION OF TAK1 COMPLEX WITHIN TLR4 COMPLEX%REACTOME DATABASE ID RELEASE 74%937072	12	0.380561	0.895846	0.587689	0.848485	1	152	tags=8%, list=1%, signal=8%
REGULATION OF CDC42 ACTIVITY%PATHWAY INTERACTION DATABASE NCI-NATURE CURATED DATA%REGULATION OF CDC42 ACTIVITY	23	0.336748	0.895655	0.61061	0.847222	1	1980	tags=39%, list=17%, signal=47%
OTHER SEMAPHORIN INTERACTIONS%REACTOME%R-HSA-416700.1	14	0.372199	0.894677	0.600671	0.847832	1	858	tags=21%, list=7%, signal=23%
PID_NOTCH_PATHWAY%MSIGDB_C2%PID_NOTCH_PATHWAY	42	0.301425	0.892811	0.622276	0.850477	1	2002	tags=24%, list=17%, signal=29%
MECP2 AND ASSOCIATED RETT SYNDROME%WIKIPATHWAYS_20201110%WP2910%MUS MUSCULUS	27	0.32045	0.886999	0.617614	0.862461	1	1724	tags=26%, list=15%, signal=30%
SIGNALING BY GPCR%REACTOME%R-HSA-372790.4	348	0.220801	0.885387	0.837383	0.864588	1	1964	tags=20%, list=17%, signal=23%
PID_CDC42_REG_PATHWAY%MSIGDB_C2%PID_CDC42_REG_PATHWAY	23	0.336748	0.885085	0.629162	0.863564	1	1980	tags=39%, list=17%, signal=47%
DETOXIFICATION OF REACTIVE OXYGEN SPECIES%REACTOME DATABASE ID RELEASE 74%3299685	24	0.335257	0.884415	0.628702	0.863366	1	2833	tags=29%, list=24%, signal=38%
BIOCARTA_GSK3_PATHWAY%MSIGDB_C2%BIOCARTA_GSK3_PATHWAY	24	0.325898	0.881629	0.636682	0.868241	1	22	tags=4%, list=0%, signal=4%
ST_DIFFERENTIATION_PATHWAY_IN_PC12_CELLS%MSIGDB_C2%ST_DIFFERENTIATION_PATHWAY_IN_PC12_CELLS	33	0.307114	0.879545	0.640936	0.871392	1	1050	tags=21%, list=9%, signal=23%
FOXO-MEDIATED TRANSCRIPTION OF OXIDATIVE STRESS, METABOLIC AND NEURONAL GENES%REACTOME%R-HSA-9615017.1	24	0.32185	0.878997	0.611857	0.87095	1	2907	tags=33%, list=25%, signal=44%
GPCR DOWNSTREAM SIGNALLING%REACTOME%R-HSA-388396.6	324	0.217743	0.877686	0.86629	0.872309	1	1964	tags=19%, list=17%, signal=23%
IRAK2 MEDIATED ACTIVATION OF TAK1 COMPLEX UPON TLR7 8 OR 9 STIMULATION%REACTOME%R-HSA-975163.1	12	0.380561	0.874207	0.599785	0.878582	1	152	tags=8%, list=1%, signal=8%
BIOCARTA_SALMONELLA_PATHWAY%MSIGDB_C2%BIOCARTA_SALMONELLA_PATHWAY	11	0.3904	0.873995	0.624344	0.877368	1	911	tags=18%, list=8%, signal=20%
IL1-MEDIATED SIGNALING EVENTS%PATHWAY INTERACTION DATABASE NCI-NATURE CURATED DATA%IL1-MEDIATED SIGNALING EVENTS	33	0.29857	0.873331	0.651355	0.877187	1	1204	tags=18%, list=10%, signal=20%
OVARIAN INFERTILITY GENES%WIKIPATHWAYS_20201110%WP273%MUS MUSCULUS	15	0.35901	0.872276	0.628796	0.877944	1	86	tags=7%, list=1%, signal=7%
DDX58 IFIH1-MEDIATED INDUCTION OF INTERFERON-ALPHA BETA%REACTOME DATABASE ID RELEASE 74%168928	51	0.279326	0.871688	0.65212	0.877535	1	2345	tags=33%, list=20%, signal=42%
AKT PHOSPHORYLATES TARGETS IN THE CYTOSOL%REACTOME%R-HSA-198323.3	14	0.365425	0.870024	0.645127	0.879599	1	679	tags=29%, list=6%, signal=30%
TRYPTOPHAN METABOLISM%WIKIPATHWAYS_20201110%WP79%MUS MUSCULUS	27	0.316642	0.867963	0.630202	0.882529	1	4465	tags=63%, list=38%, signal=102%
O-LINKED GLYCOSYLATION OF MUCINS%REACTOME DATABASE ID RELEASE 74%913709	26	0.316614	0.867493	0.624859	0.881875	1	1141	tags=19%, list=10%, signal=21%
NCAM1 INTERACTIONS%REACTOME DATABASE ID RELEASE 74%419037	16	0.348202	0.86709	0.648619	0.881109	1	1251	tags=19%, list=11%, signal=21%
CLATHRIN-MEDIATED ENDOCYTOSIS%REACTOME%R-HSA-8856828.3	103	0.247397	0.866326	0.750712	0.881168	1	1708	tags=17%, list=15%, signal=20%
PLASMA LIPOPROTEIN REMODELING%REACTOME%R-HSA-8963899.1	21	0.332068	0.863588	0.648291	0.885587	1	758	tags=14%, list=6%, signal=15%
NABA_SECRETED_FACTORS%MSIGDB_C2%NABA_SECRETED_FACTORS	101	0.247792	0.863471	0.729508	0.884148	1	2607	tags=25%, list=22%, signal=32%
CARGO CONCENTRATION IN THE ER%REACTOME%R-HSA-5694530.1	22	0.325203	0.862556	0.651515	0.884503	1	2455	tags=36%, list=21%, signal=46%
PID_ARF6_TRAFFICKING_PATHWAY%MSIGDB_C2%PID_ARF6_TRAFFICKING_PATHWAY	33	0.297476	0.86247	0.664565	0.883012	1	2071	tags=24%, list=18%, signal=29%
PURINERGIC SIGNALING IN LEISHMANIASIS INFECTION%REACTOME%R-HSA-9660826.1	17	0.348307	0.861231	0.639871	0.884094	1	976	tags=18%, list=8%, signal=19%
CELL RECRUITMENT (PRO-INFLAMMATORY RESPONSE)%REACTOME DATABASE ID RELEASE 74%9664424	17	0.348307	0.859653	0.650562	0.885937	1	976	tags=18%, list=8%, signal=19%
CD209 (DC-SIGN) SIGNALING%REACTOME DATABASE ID RELEASE 74%5621575	16	0.353764	0.858824	0.63969	0.886053	1	598	tags=13%, list=5%, signal=13%
GLYCOLYSIS AND GLUCONEOGENESIS%WIKIPATHWAYS_20201110%WP157%MUS MUSCULUS	41	0.283148	0.857647	0.70184	0.887044	1	1917	tags=29%, list=16%, signal=35%
METHYLATION%REACTOME DATABASE ID RELEASE 74%156581	13	0.364379	0.856093	0.673913	0.888741	1	2598	tags=38%, list=22%, signal=49%
PID_IL1_PATHWAY%MSIGDB_C2%PID_IL1_PATHWAY	33	0.29857	0.856012	0.674613	0.887217	1	1204	tags=18%, list=10%, signal=20%
BIOCARTA_MTOR_PATHWAY%MSIGDB_C2%BIOCARTA_MTOR_PATHWAY	20	0.33377	0.854211	0.661166	0.889512	1	470	tags=15%, list=4%, signal=16%
CARGO TRAFFICKING TO THE PERICILIARY MEMBRANE%REACTOME DATABASE ID RELEASE 74%5620920	41	0.286564	0.853855	0.690758	0.888598	1	2606	tags=41%, list=22%, signal=53%
ALPHA6BETA4INTEGRIN%IOB%ALPHA6BETA4INTEGRIN	51	0.270494	0.850498	0.705325	0.894389	1	519	tags=8%, list=4%, signal=8%
FATTY ACYL-COA BIOSYNTHESIS%REACTOME%R-HSA-75105.6	30	0.303652	0.850401	0.680365	0.892923	1	2951	tags=40%, list=25%, signal=53%
REGULATION OF KIT SIGNALING%REACTOME%R-HSA-1433559.1	12	0.369758	0.850146	0.662281	0.89183	1	146	tags=8%, list=1%, signal=8%
ASSEMBLY AND CELL SURFACE PRESENTATION OF NMDA RECEPTORS%REACTOME%R-HSA-9609736.3	11	0.373791	0.849452	0.654373	0.8917	1	3051	tags=36%, list=26%, signal=49%
METAPATHWAY BIOTRANSFORMATION%WIKIPATHWAYS_20201110%WP1251%MUS MUSCULUS	78	0.255428	0.848858	0.7251	0.891359	1	2860	tags=29%, list=24%, signal=39%
BRANCHED-CHAIN AMINO ACID CATABOLISM%REACTOME DATABASE ID RELEASE 74%70895	20	0.325358	0.848638	0.671928	0.890187	1	3151	tags=30%, list=27%, signal=41%
MEIOTIC SYNAPSIS%REACTOME DATABASE ID RELEASE 74%1221632	20	0.329497	0.848427	0.676437	0.888969	1	868	tags=15%, list=7%, signal=16%
ACTIVATION OF SMO%REACTOME DATABASE ID RELEASE 74%5635838	10	0.39201	0.847588	0.663848	0.889144	1	1592	tags=30%, list=14%, signal=35%
DISEASES ASSOCIATED WITH O-GLYCOSYLATION OF PROTEINS%REACTOME%R-HSA-3906995.2	27	0.304404	0.84739	0.68128	0.88794	1	2709	tags=37%, list=23%, signal=48%
OMEGA-3/OMEGA-6 FA SYNTHESIS%WIKIPATHWAYS_20201110%WP4350%MUS MUSCULUS	14	0.353644	0.846442	0.647316	0.888383	1	2619	tags=50%, list=22%, signal=64%
ST_WNT_BETA_CATENIN_PATHWAY%MSIGDB_C2%ST_WNT_BETA_CATENIN_PATHWAY	22	0.316295	0.845314	0.668982	0.889158	1	2589	tags=55%, list=22%, signal=70%
ARF6 TRAFFICKING EVENTS%PATHWAY INTERACTION DATABASE NCI-NATURE CURATED DATA%ARF6 TRAFFICKING EVENTS	33	0.297476	0.84423	0.686956	0.889828	1	2071	tags=24%, list=18%, signal=29%
ECM PROTEOGLYCANS%REACTOME DATABASE ID RELEASE 74%3000178	26	0.30682	0.844221	0.684332	0.888205	1	2092	tags=27%, list=18%, signal=33%
ABC TRANSPORTERS IN LIPID HOMEOSTASIS%REACTOME%R-HSA-1369062.2	13	0.366238	0.843223	0.661926	0.888639	1	2693	tags=46%, list=23%, signal=60%
HALLMARK_KRAS_SIGNALING_DN%MSIGDB_C2%HALLMARK_KRAS_SIGNALING_DN	66	0.256481	0.84041	0.756659	0.89285	1	2213	tags=24%, list=19%, signal=30%
PID_ERA_GENOMIC_PATHWAY%MSIGDB_C2%PID_ERA_GENOMIC_PATHWAY	48	0.268868	0.839088	0.732143	0.893991	1	1724	tags=25%, list=15%, signal=29%
XENOBIOTICS%REACTOME DATABASE ID RELEASE 74%211981	12	0.364611	0.837638	0.679025	0.895379	1	172	tags=8%, list=1%, signal=8%
LIGAND-DEPENDENT CASPASE ACTIVATION%REACTOME%R-HSA-140534.5	12	0.358674	0.834795	0.668432	0.899638	1	152	tags=8%, list=1%, signal=8%
LAMININ INTERACTIONS%REACTOME DATABASE ID RELEASE 74%3000157	10	0.378744	0.833104	0.686295	0.90151	1	457	tags=20%, list=4%, signal=21%
VALIDATED NUCLEAR ESTROGEN RECEPTOR ALPHA NETWORK%PATHWAY INTERACTION DATABASE NCI-NATURE CURATED DATA%VALIDATED NUCLEAR ESTROGEN RECEPTOR ALPHA NETWORK	48	0.268868	0.832489	0.739024	0.901113	1	1724	tags=25%, list=15%, signal=29%
RAB GERANYLGERANYLATION%REACTOME DATABASE ID RELEASE 74%8873719	44	0.271827	0.83101	0.73191	0.902432	1	2514	tags=32%, list=21%, signal=40%
HALLMARK_CHOLESTEROL_HOMEOSTASIS%MSIGDB_C2%HALLMARK_CHOLESTEROL_HOMEOSTASIS	62	0.263238	0.830509	0.73913	0.901849	1	2290	tags=24%, list=20%, signal=30%
BIOCARTA_AKT_PATHWAY%MSIGDB_C2%BIOCARTA_AKT_PATHWAY	20	0.31521	0.828843	0.711449	0.903578	1	1025	tags=20%, list=9%, signal=22%
TGF-BETA RECEPTOR SIGNALING ACTIVATES SMADS%REACTOME DATABASE ID RELEASE 74%2173789	27	0.298083	0.828624	0.7	0.902389	1	2034	tags=22%, list=17%, signal=27%
BIOCARTA_ATM_PATHWAY%MSIGDB_C2%BIOCARTA_ATM_PATHWAY	19	0.325022	0.827932	0.688669	0.902217	1	1100	tags=32%, list=9%, signal=35%
GLYCEROPHOSPHOLIPID BIOSYNTHESIS%REACTOME%R-HSA-1483206.4	80	0.243165	0.827665	0.787599	0.901144	1	2635	tags=24%, list=23%, signal=30%
FAS PATHWAY AND STRESS INDUCTION OF HSP REGULATION%WIKIPATHWAYS_20201110%WP571%MUS MUSCULUS	34	0.284095	0.824137	0.730363	0.906606	1	2264	tags=32%, list=19%, signal=40%
TRIACYLGLYCEROL BIOSYNTHESIS%HUMANCYC%TRIGLSYN-PWY	13	0.352304	0.823424	0.682222	0.906439	1	732	tags=15%, list=6%, signal=16%
IKK COMPLEX RECRUITMENT MEDIATED BY RIP1%REACTOME%R-HSA-937041.1	17	0.334591	0.822096	0.693002	0.907478	1	679	tags=18%, list=6%, signal=19%
GAP JUNCTION TRAFFICKING%REACTOME DATABASE ID RELEASE 74%190828	10	0.377031	0.821549	0.680736	0.906903	1	3046	tags=60%, list=26%, signal=81%
BIOCARTA_RNA_PATHWAY%MSIGDB_C2%BIOCARTA_RNA_PATHWAY	10	0.367868	0.820114	0.672907	0.908066	1	2138	tags=40%, list=18%, signal=49%
GAP JUNCTION TRAFFICKING AND REGULATION%REACTOME%R-HSA-157858.1	10	0.377031	0.813265	0.696486	0.919845	1	3046	tags=60%, list=26%, signal=81%
CRISTAE FORMATION%REACTOME DATABASE ID RELEASE 74%8949613	19	0.31763	0.812686	0.698113	0.919337	1	1309	tags=21%, list=11%, signal=24%
NOTCH4 INTRACELLULAR DOMAIN REGULATES TRANSCRIPTION%REACTOME%R-HSA-9013695.1	16	0.330076	0.81008	0.711306	0.922698	1	3400	tags=38%, list=29%, signal=53%
NEUREXINS AND NEUROLIGINS%REACTOME DATABASE ID RELEASE 74%6794361	23	0.299626	0.806683	0.734043	0.927535	1	2873	tags=30%, list=25%, signal=40%
AMB2 INTEGRIN SIGNALING%PATHWAY INTERACTION DATABASE NCI-NATURE CURATED DATA%AMB2 INTEGRIN SIGNALING	23	0.298101	0.80615	0.725934	0.92692	1	2289	tags=35%, list=20%, signal=43%
NUCLEAR RECEPTORS IN LIPID METABOLISM AND TOXICITY%WIKIPATHWAYS_20201110%WP431%MUS MUSCULUS	21	0.30528	0.803732	0.728833	0.929794	1	1862	tags=19%, list=16%, signal=23%
BIOCARTA_MITOCHONDRIA_PATHWAY%MSIGDB_C2%BIOCARTA_MITOCHONDRIA_PATHWAY	18	0.312294	0.800707	0.738758	0.933821	1	2326	tags=44%, list=20%, signal=55%
ESTABLISHMENT OF SISTER CHROMATID COHESION%REACTOME DATABASE ID RELEASE 74%2468052	10	0.361165	0.800194	0.68937	0.933119	1	923	tags=20%, list=8%, signal=22%
SPHINGOLIPID METABOLISM%REACTOME DATABASE ID RELEASE 74%428157	58	0.251142	0.800097	0.829487	0.931682	1	2249	tags=17%, list=19%, signal=21%
HS-GAG DEGRADATION%REACTOME DATABASE ID RELEASE 74%2024096	13	0.338823	0.797739	0.713489	0.934317	1	298	tags=8%, list=3%, signal=8%
EGFR DOWNREGULATION%REACTOME%R-HSA-182971.6	17	0.315109	0.793128	0.740158	0.941114	1	1913	tags=35%, list=16%, signal=42%
HDACS DEACETYLATE HISTONES%REACTOME%R-HSA-3214815.3	28	0.279105	0.792965	0.770975	0.939773	1	3285	tags=39%, list=28%, signal=54%
NABA_ECM_REGULATORS%MSIGDB_C2%NABA_ECM_REGULATORS	103	0.225025	0.791058	0.89243	0.941556	1	3210	tags=31%, list=27%, signal=42%
BIOCARTA_TOLL_PATHWAY%MSIGDB_C2%BIOCARTA_TOLL_PATHWAY	34	0.27187	0.788807	0.78219	0.943879	1	2339	tags=29%, list=20%, signal=37%
ASSEMBLY OF COLLAGEN FIBRILS AND OTHER MULTIMERIC STRUCTURES%REACTOME DATABASE ID RELEASE 74%2022090	23	0.299373	0.788539	0.758027	0.942717	1	2377	tags=30%, list=20%, signal=38%
VLDLR INTERNALISATION AND DEGRADATION%REACTOME DATABASE ID RELEASE 74%8866427	10	0.363422	0.787168	0.728601	0.943521	1	3128	tags=50%, list=27%, signal=68%
PHOSPHOLIPASES%HUMANCYC%LIPASYN-PWY	18	0.313725	0.787104	0.743383	0.941998	1	2535	tags=33%, list=22%, signal=42%
SPHINGOLIPID METABOLISM (INTEGRATED PATHWAY)%WIKIPATHWAYS_20201110%WP4690%MUS MUSCULUS	18	0.313903	0.785928	0.743889	0.942456	1	3976	tags=44%, list=34%, signal=67%
EFFECTS OF PIP2 HYDROLYSIS%REACTOME%R-HSA-114508.2	19	0.310132	0.784315	0.742494	0.943656	1	3243	tags=58%, list=28%, signal=80%
PRE-NOTCH TRANSCRIPTION AND TRANSLATION%REACTOME%R-HSA-1912408.4	30	0.274589	0.779095	0.790776	0.950928	1	2638	tags=23%, list=23%, signal=30%
BIOCARTA_RAB_PATHWAY%MSIGDB_C2%BIOCARTA_RAB_PATHWAY	10	0.359054	0.778629	0.730074	0.950056	1	2002	tags=50%, list=17%, signal=60%
LPA RECEPTOR MEDIATED EVENTS%PATHWAY INTERACTION DATABASE NCI-NATURE CURATED DATA%LPA RECEPTOR MEDIATED EVENTS	47	0.254332	0.777644	0.836526	0.950114	1	2289	tags=30%, list=20%, signal=37%
AFLATOXIN ACTIVATION AND DETOXIFICATION%REACTOME%R-HSA-5423646.3	10	0.352043	0.7741	0.737792	0.954334	1	3507	tags=50%, list=30%, signal=71%
SELENIUM MICRONUTRIENT NETWORK%WIKIPATHWAYS_20201110%WP1272%MUS MUSCULUS	15	0.315859	0.772874	0.779429	0.954757	1	3966	tags=47%, list=34%, signal=71%
REGULATION OF MECP2 EXPRESSION AND ACTIVITY%REACTOME DATABASE ID RELEASE 74%9022692	25	0.283215	0.769172	0.807783	0.959214	1	3051	tags=32%, list=26%, signal=43%
ST_GA13_PATHWAY%MSIGDB_C2%ST_GA13_PATHWAY	29	0.28049	0.768606	0.7993	0.958482	1	2264	tags=34%, list=19%, signal=43%
PID_LYSOPHOSPHOLIPID_PATHWAY%MSIGDB_C2%PID_LYSOPHOSPHOLIPID_PATHWAY	48	0.250539	0.766796	0.848408	0.959785	1	2289	tags=29%, list=20%, signal=36%
BIOCARTA_CARM1_PATHWAY%MSIGDB_C2%BIOCARTA_CARM1_PATHWAY	12	0.337878	0.766618	0.764081	0.958441	1	598	tags=8%, list=5%, signal=9%
SIGNALING BY EGFR%REACTOME%R-HSA-177929.2	32	0.262348	0.760857	0.838284	0.965831	1	1913	tags=25%, list=16%, signal=30%
THE NLRP3 INFLAMMASOME%REACTOME DATABASE ID RELEASE 74%844456	13	0.329044	0.758287	0.766376	0.96816	1	2138	tags=31%, list=18%, signal=38%
ANTIGEN ACTIVATES B CELL RECEPTOR (BCR) LEADING TO GENERATION OF SECOND MESSENGERS%REACTOME%R-HSA-983695.4	22	0.288424	0.757346	0.812852	0.967989	1	3316	tags=45%, list=28%, signal=63%
SA_PROGRAMMED_CELL_DEATH%MSIGDB_C2%SA_PROGRAMMED_CELL_DEATH	12	0.331393	0.756554	0.790723	0.967566	1	1546	tags=33%, list=13%, signal=38%
SUPERPATHWAY OF INOSITOL PHOSPHATE COMPOUNDS%HUMANCYC%PWY-6371	52	0.241747	0.755415	0.868675	0.967689	1	3300	tags=46%, list=28%, signal=64%
ONE CARBON METABOLISM%WIKIPATHWAYS_20201110%WP435%MUS MUSCULUS	28	0.265075	0.755041	0.823105	0.966597	1	2625	tags=39%, list=22%, signal=51%
BIOCARTA_PTDINS_PATHWAY%MSIGDB_C2%BIOCARTA_PTDINS_PATHWAY	20	0.292256	0.754607	0.806167	0.965642	1	626	tags=10%, list=5%, signal=11%
LKB1 SIGNALING EVENTS%PATHWAY INTERACTION DATABASE NCI-NATURE CURATED DATA%LKB1 SIGNALING EVENTS	36	0.254988	0.753685	0.834313	0.965411	1	2058	tags=31%, list=18%, signal=37%
CYTOKINES AND INFLAMMATORY RESPONSE%WIKIPATHWAYS_20201110%WP222%MUS MUSCULUS	10	0.348324	0.752447	0.77673	0.965594	1	262	tags=10%, list=2%, signal=10%
OXIDATION BY CYTOCHROME P450%WIKIPATHWAYS_20201110%WP1274%MUS MUSCULUS	19	0.291551	0.751559	0.796804	0.965292	1	1248	tags=16%, list=11%, signal=18%
TCR SIGNALING IN NAIVE CD4+ T CELLS%PATHWAY INTERACTION DATABASE NCI-NATURE CURATED DATA%TCR SIGNALING IN NAIVE CD4+ T CELLS	51	0.240451	0.747522	0.871046	0.969534	1	1331	tags=12%, list=11%, signal=13%
PROSTAGLANDIN SYNTHESIS AND REGULATION%WIKIPATHWAYS_20201110%WP374%MUS MUSCULUS	18	0.295776	0.746932	0.822323	0.968814	1	2881	tags=33%, list=25%, signal=44%
NABA_CORE_MATRISOME%MSIGDB_C2%NABA_CORE_MATRISOME	71	0.225675	0.745843	0.912418	0.968736	1	1824	tags=15%, list=16%, signal=18%
REGULATION OF COMPLEMENT CASCADE%REACTOME%R-HSA-977606.5	26	0.271731	0.742726	0.844714	0.971569	1	1988	tags=19%, list=17%, signal=23%
PHOSPHOLIPID METABOLISM%REACTOME DATABASE ID RELEASE 74%1483257	145	0.202107	0.740446	0.96657	0.973125	1	2235	tags=21%, list=19%, signal=25%
COMPLEMENT CASCADE%REACTOME DATABASE ID RELEASE 74%166658	28	0.264062	0.738801	0.844015	0.973761	1	1988	tags=18%, list=17%, signal=21%
VXPX CARGO-TARGETING TO CILIUM%REACTOME DATABASE ID RELEASE 74%5620916	16	0.301171	0.738419	0.798876	0.972681	1	2606	tags=44%, list=22%, signal=56%
EPH-EPHRIN SIGNALING%REACTOME DATABASE ID RELEASE 74%2682334	64	0.226577	0.737926	0.907895	0.971751	1	2068	tags=27%, list=18%, signal=32%
DISSOLUTION OF FIBRIN CLOT%REACTOME%R-HSA-75205.2	10	0.335682	0.737147	0.785106	0.971229	1	1324	tags=20%, list=11%, signal=23%
CIRCADIAN RHYTHM PATHWAY%PATHWAY INTERACTION DATABASE NCI-NATURE CURATED DATA%CIRCADIAN RHYTHM PATHWAY	14	0.302741	0.735614	0.823204	0.971678	1	2200	tags=21%, list=19%, signal=26%
WHITE FAT CELL DIFFERENTIATION%WIKIPATHWAYS_20201110%WP2872%MUS MUSCULUS	21	0.279534	0.734195	0.827586	0.971985	1	743	tags=10%, list=6%, signal=10%
PID_TCR_PATHWAY%MSIGDB_C2%PID_TCR_PATHWAY	52	0.233184	0.73419	0.904282	0.970409	1	1331	tags=12%, list=11%, signal=13%
METABOLISM OF VITAMINS AND COFACTORS%REACTOME DATABASE ID RELEASE 74%196854	138	0.201379	0.733774	0.961756	0.969389	1	2284	tags=23%, list=20%, signal=28%
SYNTHESIS OF IP2, IP, AND INS IN THE CYTOSOL%REACTOME%R-HSA-1855183.5	11	0.321783	0.730994	0.805763	0.971384	1	2109	tags=27%, list=18%, signal=33%
NABA_ECM_GLYCOPROTEINS%MSIGDB_C2%NABA_ECM_GLYCOPROTEINS	51	0.235354	0.730874	0.895275	0.969967	1	1824	tags=18%, list=16%, signal=21%
METABOLISM OF FOLATE AND PTERINES%REACTOME DATABASE ID RELEASE 74%196757	14	0.306384	0.728619	0.809524	0.97124	1	2070	tags=36%, list=18%, signal=43%
N-GLYCAN TRIMMING IN THE ER AND CALNEXIN CALRETICULIN CYCLE%REACTOME%R-HSA-532668.2	31	0.255165	0.726025	0.863258	0.972966	1	3225	tags=29%, list=28%, signal=40%
INSULIN PROCESSING%REACTOME%R-HSA-264876.2	17	0.290707	0.725292	0.824138	0.972373	1	1009	tags=18%, list=9%, signal=19%
NUCLEOTIDE SALVAGE%REACTOME%R-HSA-8956321.1	20	0.277512	0.724859	0.856273	0.971326	1	300	tags=10%, list=3%, signal=10%
CLASS I PEROXISOMAL MEMBRANE PROTEIN IMPORT%REACTOME DATABASE ID RELEASE 74%9603798	16	0.294409	0.724283	0.82489	0.970491	1	2155	tags=31%, list=18%, signal=38%
BINDING AND UPTAKE OF LIGANDS BY SCAVENGER RECEPTORS%REACTOME DATABASE ID RELEASE 74%2173782	26	0.264035	0.719383	0.876853	0.975023	1	1688	tags=23%, list=14%, signal=27%
PID_CIRCADIAN_PATHWAY%MSIGDB_C2%PID_CIRCADIAN_PATHWAY	14	0.302742	0.714934	0.819599	0.978764	1	2200	tags=21%, list=19%, signal=26%
FCGR3A-MEDIATED IL10 SYNTHESIS%REACTOME DATABASE ID RELEASE 74%9664323	26	0.26062	0.714025	0.865604	0.978243	1	700	tags=12%, list=6%, signal=12%
VEGFR2 MEDIATED CELL PROLIFERATION%REACTOME%R-HSA-5218921.3	14	0.296784	0.712326	0.836956	0.978629	1	3913	tags=50%, list=33%, signal=75%
GLUTATHIONE-MEDIATED DETOXIFICATION I%HUMANCYC%PWY-4061	13	0.304198	0.711628	0.850109	0.977878	1	3507	tags=46%, list=30%, signal=66%
MECP2 REGULATES NEURONAL RECEPTORS AND CHANNELS%REACTOME%R-HSA-9022699.1	10	0.321998	0.704597	0.817318	0.984227	1	2873	tags=50%, list=25%, signal=66%
LISSENCEPHALY GENE (LIS1) IN NEURONAL MIGRATION AND DEVELOPMENT%PATHWAY INTERACTION DATABASE NCI-NATURE CURATED DATA%LISSENCEPHALY GENE (LIS1) IN NEURONAL MIGRATION AND DEVELOPMENT	18	0.275882	0.704099	0.864572	0.983218	1	78	tags=6%, list=1%, signal=6%
AURORA A SIGNALING%PATHWAY INTERACTION DATABASE NCI-NATURE CURATED DATA%AURORA A SIGNALING	30	0.249642	0.700162	0.904018	0.985873	1	929	tags=17%, list=8%, signal=18%
BIOCARTA_ALK_PATHWAY%MSIGDB_C2%BIOCARTA_ALK_PATHWAY	22	0.268215	0.69833	0.867696	0.986298	1	3166	tags=41%, list=27%, signal=56%
STIMULI-SENSING CHANNELS%REACTOME%R-HSA-2672351.4	43	0.230715	0.697918	0.907317	0.98517	1	2041	tags=21%, list=17%, signal=25%
PID_AURORA_A_PATHWAY%MSIGDB_C2%PID_AURORA_A_PATHWAY	30	0.249642	0.697285	0.905724	0.984246	1	929	tags=17%, list=8%, signal=18%
BIOCARTA_CARDIACEGF_PATHWAY%MSIGDB_C2%BIOCARTA_CARDIACEGF_PATHWAY	13	0.297628	0.695914	0.846234	0.984088	1	3009	tags=46%, list=26%, signal=62%
NUCLEOBASE CATABOLISM%REACTOME%R-HSA-8956319.1	24	0.259386	0.6959	0.891637	0.982548	1	1207	tags=17%, list=10%, signal=19%
BIOCARTA_CALCINEURIN_PATHWAY%MSIGDB_C2%BIOCARTA_CALCINEURIN_PATHWAY	13	0.292406	0.694737	0.847098	0.982188	1	644	tags=15%, list=6%, signal=16%
CALNEXIN CALRETICULIN CYCLE%REACTOME%R-HSA-901042.2	22	0.260962	0.692123	0.867664	0.983285	1	1245	tags=14%, list=11%, signal=15%
PID_LIS1_PATHWAY%MSIGDB_C2%PID_LIS1_PATHWAY	18	0.275882	0.69207	0.885745	0.981797	1	78	tags=6%, list=1%, signal=6%
BIOCARTA_P53HYPOXIA_PATHWAY%MSIGDB_C2%BIOCARTA_P53HYPOXIA_PATHWAY	18	0.274261	0.691736	0.893836	0.980595	1	1592	tags=22%, list=14%, signal=26%
PID_LKB1_PATHWAY%MSIGDB_C2%PID_LKB1_PATHWAY	40	0.229529	0.690501	0.930087	0.980274	1	2058	tags=28%, list=18%, signal=33%
BIOCARTA_NKCELLS_PATHWAY%MSIGDB_C2%BIOCARTA_NKCELLS_PATHWAY	14	0.28809	0.684472	0.88306	0.98459	1	1278	tags=14%, list=11%, signal=16%
ROLE OF PHOSPHOLIPIDS IN PHAGOCYTOSIS%REACTOME%R-HSA-2029485.1	19	0.266654	0.680509	0.898678	0.986756	1	3612	tags=42%, list=31%, signal=61%
RHO GTPASES ACTIVATE PKNS%REACTOME%R-HSA-5625740.1	30	0.243998	0.678522	0.917729	0.987023	1	2568	tags=30%, list=22%, signal=38%
MEVALONATE PATHWAY I%HUMANCYC%PWY-922	10	0.313783	0.677809	0.881857	0.986135	1	1911	tags=30%, list=16%, signal=36%
PID_ECADHERIN_STABILIZATION_PATHWAY%MSIGDB_C2%PID_ECADHERIN_STABILIZATION_PATHWAY	29	0.241997	0.676308	0.89917	0.985976	1	2289	tags=28%, list=20%, signal=34%
GLYCOSAMINOGLYCAN METABOLISM%REACTOME DATABASE ID RELEASE 74%1630316	75	0.202178	0.671307	0.978065	0.988804	1	1825	tags=15%, list=16%, signal=17%
BIOCARTA_DREAM_PATHWAY%MSIGDB_C2%BIOCARTA_DREAM_PATHWAY	10	0.303627	0.667715	0.853783	0.990314	1	801	tags=10%, list=7%, signal=11%
ONE CARBON METABOLISM AND RELATED PATHWAYS%WIKIPATHWAYS_20201110%WP1770%MUS MUSCULUS	42	0.222379	0.667425	0.946914	0.989029	1	2835	tags=33%, list=24%, signal=44%
ER QUALITY CONTROL COMPARTMENT (ERQC)%REACTOME%R-HSA-901032.5	17	0.272877	0.666428	0.876232	0.988267	1	1245	tags=12%, list=11%, signal=13%
PID_IL8_CXCR1_PATHWAY%MSIGDB_C2%PID_IL8_CXCR1_PATHWAY	23	0.248542	0.664462	0.910673	0.988379	1	626	tags=9%, list=5%, signal=9%
SYNTHESIS OF PA%REACTOME%R-HSA-1483166.6	19	0.260827	0.660622	0.900571	0.989972	1	1914	tags=21%, list=16%, signal=25%
DOWNREGULATION OF TGF-BETA RECEPTOR SIGNALING%REACTOME DATABASE ID RELEASE 74%2173788	21	0.257637	0.660538	0.90919	0.988512	1	79	tags=5%, list=1%, signal=5%
IL8- AND CXCR1-MEDIATED SIGNALING EVENTS%PATHWAY INTERACTION DATABASE NCI-NATURE CURATED DATA%IL8- AND CXCR1-MEDIATED SIGNALING EVENTS	23	0.248542	0.659881	0.921769	0.987505	1	626	tags=9%, list=5%, signal=9%
RIP-MEDIATED NFKB ACTIVATION VIA ZBP1%REACTOME DATABASE ID RELEASE 74%1810476	15	0.269218	0.655676	0.900881	0.989279	1	2138	tags=27%, list=18%, signal=33%
ION TRANSPORT BY P-TYPE ATPASES%REACTOME%R-HSA-936837.3	28	0.237012	0.652575	0.926966	0.990054	1	1236	tags=11%, list=11%, signal=12%
ALPHA-LINOLENIC ACID (ALA) METABOLISM%REACTOME DATABASE ID RELEASE 74%2046106	11	0.288689	0.650301	0.871822	0.990207	1	2619	tags=27%, list=22%, signal=35%
TP53 REGULATES TRANSCRIPTION OF GENES INVOLVED IN CYTOCHROME C RELEASE%REACTOME DATABASE ID RELEASE 74%6803204	13	0.279006	0.649427	0.886339	0.989339	1	2181	tags=31%, list=19%, signal=38%
HEME DEGRADATION%REACTOME%R-HSA-189483.2	10	0.301967	0.648084	0.890625	0.988809	1	3899	tags=30%, list=33%, signal=45%
ALPHA-LINOLENIC (OMEGA3) AND LINOLEIC (OMEGA6) ACID METABOLISM%REACTOME DATABASE ID RELEASE 74%2046104	11	0.288689	0.647454	0.872294	0.987766	1	2619	tags=27%, list=22%, signal=35%
SPHINGOLIPID METABOLISM (GENERAL OVERVIEW)%WIKIPATHWAYS_20201110%WP4344%MUS MUSCULUS	17	0.261531	0.646713	0.932648	0.986787	1	3976	tags=41%, list=34%, signal=62%
PID_PI3K_PLC_TRK_PATHWAY%MSIGDB_C2%PID_PI3K_PLC_TRK_PATHWAY	27	0.234108	0.645897	0.936563	0.985823	1	86	tags=4%, list=1%, signal=4%
PLASMA MEMBRANE ESTROGEN RECEPTOR SIGNALING%PATHWAY INTERACTION DATABASE NCI-NATURE CURATED DATA%PLASMA MEMBRANE ESTROGEN RECEPTOR SIGNALING	33	0.22543	0.643091	0.938751	0.986231	1	788	tags=12%, list=7%, signal=13%
TRK RECEPTOR SIGNALING MEDIATED BY PI3K AND PLC-GAMMA%PATHWAY INTERACTION DATABASE NCI-NATURE CURATED DATA%TRK RECEPTOR SIGNALING MEDIATED BY PI3K AND PLC-GAMMA	27	0.234108	0.63964	0.941928	0.987026	1	86	tags=4%, list=1%, signal=4%
PID_AMB2_NEUTROPHILS_PATHWAY%MSIGDB_C2%PID_AMB2_NEUTROPHILS_PATHWAY	31	0.22491	0.638856	0.94491	0.98604	1	2289	tags=26%, list=20%, signal=32%
HDR THROUGH MMEJ (ALT-NHEJ)%REACTOME DATABASE ID RELEASE 74%5685939	10	0.289012	0.638309	0.88781	0.984926	1	1946	tags=30%, list=17%, signal=36%
FATTY ACID BIOSYNTHESIS%WIKIPATHWAYS_20201110%WP336%MUS MUSCULUS	21	0.236502	0.633135	0.916573	0.986729	1	2909	tags=33%, list=25%, signal=44%
PID_ER_NONGENOMIC_PATHWAY%MSIGDB_C2%PID_ER_NONGENOMIC_PATHWAY	34	0.216223	0.629294	0.954762	0.987607	1	788	tags=12%, list=7%, signal=13%
DEFECTS IN VITAMIN AND COFACTOR METABOLISM%REACTOME DATABASE ID RELEASE 74%3296482	18	0.251891	0.628831	0.918142	0.986413	1	2598	tags=33%, list=22%, signal=43%
TRANSLATION OF STRUCTURAL PROTEINS%REACTOME%R-HSA-9683701.2	21	0.242064	0.625223	0.934426	0.987027	1	3003	tags=38%, list=26%, signal=51%
CDP-DIACYLGLYCEROL BIOSYNTHESIS I%HUMANCYC%PWY-5667	12	0.272207	0.624304	0.910989	0.986081	1	3642	tags=42%, list=31%, signal=60%
STABILIZATION AND EXPANSION OF THE E-CADHERIN ADHERENS JUNCTION%PATHWAY INTERACTION DATABASE NCI-NATURE CURATED DATA%STABILIZATION AND EXPANSION OF THE E-CADHERIN ADHERENS JUNCTION	28	0.222115	0.622425	0.950331	0.985701	1	2289	tags=25%, list=20%, signal=31%
SYNTHESIS OF PC%REACTOME DATABASE ID RELEASE 74%1483191	19	0.240164	0.622007	0.940331	0.984485	1	1788	tags=16%, list=15%, signal=19%
PHOSPHATIDYLGLYCEROL BIOSYNTHESIS II (NON-PLASTIDIC)%HUMANCYC%PWY4FS-8	13	0.269752	0.619308	0.928647	0.984495	1	3642	tags=38%, list=31%, signal=56%
INTERNALIZATION OF ERBB1%PATHWAY INTERACTION DATABASE NCI-NATURE CURATED DATA%INTERNALIZATION OF ERBB1	33	0.217955	0.619158	0.968047	0.983115	1	2250	tags=21%, list=19%, signal=26%
BETA2 INTEGRIN CELL SURFACE INTERACTIONS%PATHWAY INTERACTION DATABASE NCI-NATURE CURATED DATA%BETA2 INTEGRIN CELL SURFACE INTERACTIONS	18	0.245275	0.615466	0.932417	0.983602	1	2549	tags=28%, list=22%, signal=35%
PID_INTEGRIN2_PATHWAY%MSIGDB_C2%PID_INTEGRIN2_PATHWAY	18	0.245274	0.614376	0.914729	0.982685	1	2549	tags=28%, list=22%, signal=35%
COLLAGEN FORMATION%REACTOME%R-HSA-1474290.2	38	0.207325	0.60938	0.965311	0.983751	1	3092	tags=29%, list=26%, signal=39%
PID_ERBB1_INTERNALIZATION_PATHWAY%MSIGDB_C2%PID_ERBB1_INTERNALIZATION_PATHWAY	35	0.203067	0.596713	0.981438	0.988282	1	2250	tags=20%, list=19%, signal=25%
PEPTIDE HORMONE METABOLISM%REACTOME DATABASE ID RELEASE 74%2980736	39	0.199364	0.592663	0.98093	0.988583	1	1051	tags=13%, list=9%, signal=14%
FATTY ACID BETA OXIDATION%WIKIPATHWAYS_20201110%WP1269%MUS MUSCULUS	30	0.209161	0.592367	0.976553	0.987265	1	2909	tags=27%, list=25%, signal=35%
WNT SIGNALING PATHWAY%WIKIPATHWAYS_20201110%WP403%MUS MUSCULUS	40	0.193663	0.585078	0.980301	0.988726	1	2987	tags=35%, list=26%, signal=47%
ID%IOB%ID	18	0.238024	0.584925	0.958425	0.987341	1	1759	tags=17%, list=15%, signal=20%
TRYPTOPHAN DEGRADATION III (EUKARYOTIC)%HUMANCYC%TRYPTOPHAN-DEGRADATION-1	10	0.26413	0.569999	0.941622	0.991404	1	2419	tags=30%, list=21%, signal=38%
ST_WNT_CA2_CYCLIC_GMP_PATHWAY%MSIGDB_C2%ST_WNT_CA2_CYCLIC_GMP_PATHWAY	14	0.235386	0.564143	0.954945	0.991864	1	3156	tags=43%, list=27%, signal=59%
RHO GTPASES ACTIVATE KTN1%REACTOME%R-HSA-5625970.1	10	0.255581	0.550184	0.947705	0.99462	1	8712	tags=100%, list=74%, signal=391%
BIOCARTA_TCR_PATHWAY%MSIGDB_C2%BIOCARTA_TCR_PATHWAY	34	0.191323	0.545967	0.988221	0.994298	1	929	tags=9%, list=8%, signal=10%
MUCOPOLYSACCHARIDOSES%REACTOME DATABASE ID RELEASE 74%2206281	11	0.241146	0.535566	0.944146	0.995429	1	8881	tags=100%, list=76%, signal=415%
PROTEIN-PROTEIN INTERACTIONS AT SYNAPSES%REACTOME DATABASE ID RELEASE 74%6794362	33	0.184509	0.534919	0.987937	0.99415	1	3287	tags=36%, list=28%, signal=50%
NEURAL CREST DIFFERENTIATION%WIKIPATHWAYS_20201110%WP2074%MUS MUSCULUS	47	0.172544	0.532184	0.997449	0.993367	1	3228	tags=30%, list=28%, signal=41%
ALPHA-SYNUCLEIN SIGNALING%PATHWAY INTERACTION DATABASE NCI-NATURE CURATED DATA%ALPHA-SYNUCLEIN SIGNALING	22	0.198085	0.531601	0.977492	0.992053	1	3769	tags=50%, list=32%, signal=74%
SYNAPTIC_VESICLE_TRAFFICKING%PANTHER PATHWAY%P05734	12	0.23051	0.524591	0.974781	0.992082	1	1717	tags=17%, list=15%, signal=20%
PID_ARF_3PATHWAY%MSIGDB_C2%PID_ARF_3PATHWAY	19	0.183659	0.482181	0.989595	0.997568	1	3128	tags=37%, list=27%, signal=50%
ARF1 PATHWAY%PATHWAY INTERACTION DATABASE NCI-NATURE CURATED DATA%ARF1 PATHWAY	19	0.183659	0.465259	0.993007	0.99798	1	3128	tags=37%, list=27%, signal=50%
INCRETIN SYNTHESIS, SECRETION, AND INACTIVATION%REACTOME%R-HSA-400508.1	10	0.185686	0.40652	0.997797	1	1	4546	tags=50%, list=39%, signal=82%
SYNTHESIS OF PROSTAGLANDINS (PG) AND THROMBOXANES (TX)%REACTOME%R-HSA-2162123.2	11	0.170541	0.382234	0.996739	0.999477	1	2542	tags=18%, list=22%, signal=23%

## Sheet: RankedGenes_input
Table S4. Gene Set Enrichment Analysis (GSEA) to identify pathways that regulate the IFNg resposne in macrophages
For additional details, see Materials and methods; gene sets/pathways queried courtesy of Merico et al. (2010) and Reimand et al. (2019); GSEA info per original publication (Subramanian et al., 2005)
Tab 1 "GSEA_output": GSEA results of pooled CRISPR analysis per analysis described in methods
Tab 2 "RankedGenes_input": Gene rank list as derived score calculated from MAGeCK-MLE beta scores and statistical testing
"Gene": Gene symbol
"RankScore": equal to the log(p_sum)*(beta_sum)
"beta_sum": equal to the sum of "pos | beta" and "neg | beta" as found in TableS3
"z_sum": equal to the sum of "pos | z" and "neg | z" as found in TableS3
"p_sum": calculated p-value using "z_sum" using Stouffer's method
Gene	RankScore	beta_sum	z_sum	p_sum
Jak1	6.6974	-1.87786	-5.4012	0.000271329
Stat1	6.344	-2.54749	-4.3887	0.00323376
Ifngr2	4.62562	-3.2151	-3.0944	0.0364153
Ifngr1	2.28679	-2.36977	-2.283	0.108396
Jak2	2.24735	-2.65619	-2.02902	0.142535
Irf1	2.22823	-1.36558	-3.3694	0.0233501
Cd274	2.01986	-1.34968	-3.1793	0.0318752
Tnfrsf1a	1.95679	-1.2166	-3.3374	0.0246372
Cd40	1.65239	-1.49036	-2.55655	0.0778536
Ppp2r3a	1.63766	-0.74996	-4.0542	0.00655142
Ndufa2	1.48325	-1.27589	-2.65169	0.0687827
Dennd2c	1.45513	-0.77602	-3.6871	0.0133316
Trit1	1.39652	-1.22645	-2.60994	0.0726657
Ndufs2	1.39485	-1.12152	-2.78913	0.0570544
Cox5b	1.34607	-0.98941	-2.97569	0.0436034
Nsun4	1.32201	-1.02511	-2.86394	0.0513302
Dhx38	1.29583	-1.1687	-2.55665	0.0778436
Ndufb7	1.27613	-1.07975	-2.68508	0.0657857
Zfp341	1.25179	-1.03621	-2.72961	0.0619374
Mib1	1.23848	-0.9502	-2.88599	0.0497287
Amd1	1.19141	-1.06577	-2.573	0.0762284
Lrpprc	1.17906	-0.892603	-2.91383	0.0477613
Tirap	1.17471	-0.70739	-3.4087	0.0218458
Mrps18a	1.17123	-1.64171	-1.7015	0.193454
Ndufa8	1.13779	-0.955164	-2.70104	0.064387
Ndufa1	1.13764	-1.18367	-2.27517	0.109368
Ndufs8	1.12906	-0.87227	-2.8716	0.0507695
Rps28	1.11752	-1.28458	-2.08249	0.134912
Tnfrsf1b	1.09717	-0.85556	-2.8523	0.0521911
Rnf126	1.08609	-0.915788	-2.6921	0.0651682
Tmem30a	1.03299	-0.71669	-3.09829	0.0361966
Sec31a	1.02756	-0.83615	-2.7646	0.059031
Kat7	1.01924	-1.1872	-2.05707	0.138509
Mtif2	1.01031	-0.88945	-2.60502	0.0731333
Cop1	1.00489	-1.16199	-2.07108	0.13652
Vim	1.00417	-0.82024	-2.7568	0.05967
Alkbh5	0.998971	-0.6025	-3.4052	0.0219764
Dhx30	0.987499	-0.781583	-2.82155	0.054518
Hspa13	0.969834	-0.76092	-2.8396	0.0531429
Ndufaf8	0.965585	-0.809317	-2.70425	0.0641082
Ndufs1	0.927699	-1.11335	-1.99969	0.146808
Rc3h1	0.927634	-0.81934	-2.59845	0.0737611
Ndufa5	0.922923	-0.804	-2.6262	0.0711354
Med16	0.916454	-1.16889	-1.88295	0.164423
Sema5b	0.909118	-0.61522	-3.1519	0.033288
Supv3l1	0.90314	-1.11818	-1.93992	0.15571
Rbm47	0.884235	-0.76751	-2.6335	0.0704558
Bicra	0.874211	-0.73156	-2.7075	0.0638271
Mttp	0.873718	-0.62657	-3.0278	0.0403231
B3gat2	0.871792	-0.6272	-3.02099	0.0407405
Phlda1	0.862163	-0.73219	-2.6776	0.0664488
Smim26	0.859833	-0.94037	-2.17848	0.121799
Coa6	0.847502	-1.00342	-2.02569	0.143017
Luc7l	0.843299	-1.129	-1.78993	0.179084
Usp4	0.843117	-0.63735	-2.91687	0.0475501
Rfxank	0.840878	-0.7783	-2.50502	0.0830992
Ap3s1	0.839275	-0.67165	-2.79879	0.0562896
Ndufb9	0.833609	-0.79171	-2.45398	0.0885274
Mrm1	0.827586	-0.70018	-2.68524	0.0657716
Prokr2	0.823117	-0.68455	-2.7201	0.0627451
Brd9	0.818265	-1.08439	-1.80948	0.17596
Clp1	0.810399	-1.10457	-1.75547	0.184638
S1pr2	0.80567	-0.62822	-2.8524	0.0521837
Pycr2	0.796122	-0.64365	-2.77784	0.057958
Gtf2h5	0.795129	-0.79467	-2.3537	0.0998672
Nudt7	0.792453	-0.69708	-2.60667	0.0729763
Twnk	0.784325	-0.85015	-2.19578	0.119516
Plekhf1	0.77426	-0.73505	-2.45477	0.0884416
Preb	0.768988	-1.04968	-1.75262	0.1851
Dmac2	0.76713	-0.72827	-2.4548	0.0884384
Eif3m	0.766807	-0.87833	-2.08929	0.133959
Ndufaf5	0.766183	-0.79881	-2.27121	0.109861
Gm11127	0.764378	-0.70744	-2.50517	0.0830836
Ambra1	0.761506	-0.636798	-2.70893	0.0637036
Tdp1	0.761023	-0.666381	-2.61585	0.0721068
Pphln1	0.758636	-0.70307	-2.5025	0.0833618
Gpatch4	0.75497	-0.68205	-2.55329	0.0781785
Srgn	0.750604	-0.60807	-2.77372	0.0582902
Iqgap1	0.750525	-0.76434	-2.31692	0.10425
Nedd4l	0.748501	-0.79395	-2.23771	0.114089
Srsf1	0.737989	-1.34878	-1.16778	0.283692
Cops7a	0.736503	-0.828773	-2.12348	0.129221
Pdha1	0.735593	-0.849066	-2.07453	0.136033
Stk24	0.732858	-0.71414	-2.40333	0.0941433
Ybx1	0.731498	-0.980199	-1.78821	0.17936
Stap2	0.722777	-0.74355	-2.29723	0.106644
Egr1	0.722426	-0.63198	-2.61777	0.0719259
Ndufaf7	0.722169	-0.88024	-1.96993	0.151209
Ndufv2	0.722118	-0.7875	-2.18401	0.121067
Cks1b	0.721864	-0.83409	-2.07252	0.136317
Atpaf2	0.715635	-0.748391	-2.26527	0.110603
Fam114a1	0.712546	-0.67522	-2.4584	0.0880482
Acot2	0.711718	-0.53552	-2.9266	0.046879
Repin1	0.705323	-0.720355	-2.31136	0.104922
Ggta1	0.703805	-0.65091	-2.5066	0.0829349
Hikeshi	0.697716	-0.661649	-2.45696	0.0882041
Amz1	0.696715	-0.66414	-2.4467	0.0893205
Egr2	0.688846	-0.916715	-1.80143	0.177244
Myo1d	0.687404	-0.65326	-2.45275	0.0886611
Rsrc1	0.679339	-0.661483	-2.40483	0.0939737
Gdi1	0.672517	-0.62293	-2.50355	0.0832523
Med26	0.671378	-0.840261	-1.91922	0.15885
Borcs5	0.667529	-0.7862	-2.03577	0.14156
Golga4	0.665122	-0.6214	-2.48649	0.0850431
Tmem132a	0.661895	-0.64379	-2.40699	0.0937298
Bst2	0.658393	-0.5766	-2.61555	0.0721351
Cox8a	0.650031	-0.69914	-2.2108	0.117555
Psme4	0.64886	-0.62094	-2.439	0.0901646
Tfap4	0.646085	-0.97621	-1.55561	0.217856
Ndufa6	0.642432	-0.731836	-2.09986	0.132484
Ndufb4	0.638396	-0.7222	-2.11325	0.130629
Ndufs6	0.633375	-0.66812	-2.24847	0.112721
Synj2	0.6319	-0.701146	-2.15057	0.125534
Dhx29	0.631619	-0.87674	-1.72033	0.190363
Alcam	0.628477	-0.652893	-2.27819	0.108993
Upf3b	0.627958	-0.64489	-2.3006	0.106232
Lrmda	0.627179	-0.61335	-2.3963	0.0949408
Ppp1r3d	0.623841	-0.712195	-2.0957	0.133064
Slc25a51	0.623535	-0.771786	-1.94046	0.155628
Abcb4	0.622536	-0.588748	-2.46235	0.0876214
Mical1	0.61669	-0.61318	-2.36375	0.0986905
Mrrf	0.616415	-0.636058	-2.29132	0.10737
Kdm4a	0.615231	-0.720315	-2.04718	0.139922
Psme3ip1	0.613967	-0.683675	-2.14371	0.126462
Cnnm4	0.613089	-0.605747	-2.37618	0.0972478
Plec	0.608691	-0.693086	-2.10073	0.132363
Ostf1	0.607534	-0.64709	-2.2297	0.115114
Arf6	0.605722	-0.70716	-2.05266	0.139138
Zbtb42	0.601759	-0.66997	-2.14403	0.126419
Cptp	0.598456	-0.52742	-2.6029	0.0733355
Hoxc13	0.592607	-0.59621	-2.34071	0.101401
Pcdhb16	0.588934	-0.600562	-2.31436	0.104559
Rtn4ip1	0.587195	-0.66016	-2.12523	0.128981
Pten	0.585161	-0.65686	-2.1282	0.128574
Pcsk4	0.585043	-0.50484	-2.64534	0.0693635
Bbs2	0.582427	-0.7176	-1.94927	0.154301
Cbs	0.578903	-0.52172	-2.55814	0.0776954
Rnf115	0.577826	-0.54374	-2.47224	0.0865588
Zfp580	0.57752	-0.5766	-2.35569	0.0996334
Tardbp	0.571515	-1.15152	-0.94629	0.318923
Tmem126b	0.569561	-0.648268	-2.10151	0.132255
Fbxw9	0.567333	-0.50705	-2.5748	0.0760521
Deptor	0.566177	-0.66101	-2.05261	0.139145
Ndufb11	0.56409	-0.66271	-2.04058	0.140868
Ndufs5	0.557175	-0.733077	-1.82334	0.17376
Spin1	0.555833	-0.58579	-2.25024	0.112496
Ptpn6	0.553505	-0.61512	-2.14756	0.125941
Uba5	0.55102	-0.556071	-2.33472	0.102114
Masp1	0.55023	-0.602338	-2.17665	0.122042
Foxa1	0.549072	-0.53911	-2.38847	0.0958342
Dennd2a	0.549023	-0.676464	-1.94921	0.15431
Sirt1	0.546484	-0.555082	-2.32205	0.103631
Ticam2	0.546115	-0.613913	-2.12542	0.128955
Mrpl50	0.545494	-0.57123	-2.26266	0.110931
Rfx5	0.544569	-0.705704	-1.85245	0.169173
Uimc1	0.544258	-0.65133	-2.00512	0.146012
Slc16a11	0.543943	-0.59384	-2.1819	0.121346
Gpr65	0.541792	-0.56808	-2.26017	0.111244
Arrb2	0.541497	-0.51873	-2.43697	0.090388
Akr1c6	0.538149	-0.4768	-2.59223	0.0743588
Zfp865	0.537893	-0.540503	-2.3431	0.101118
Syde1	0.536918	-0.50853	-2.45942	0.0879378
Ftcd	0.536341	-0.529	-2.37958	0.0968551
Dnajc30	0.536047	-0.63212	-2.03341	0.141901
Mrpl33	0.534566	-0.58347	-2.18234	0.121288
C4b	0.533487	-0.58531	-2.17235	0.122614
Bag6	0.532583	-0.595789	-2.13483	0.12767
Mapkbp1	0.532068	-0.58347	-2.17329	0.122489
Akr1c13	0.531524	-0.49202	-2.50481	0.0831211
Uckl1	0.530926	-0.55797	-2.2557	0.111807
Ndufs3	0.530872	-0.586891	-2.15765	0.124581
Gm5127	0.530712	-0.56018	-2.24724	0.112877
Ahrr	0.52988	-0.48687	-2.51957	0.0815942
Atg12	0.527586	-0.57951	-2.1701	0.122914
Plcd3	0.527403	-0.59823	-2.10811	0.131339
Cox18	0.525361	-0.70529	-1.78463	0.179934
Tmem234	0.525281	-0.49213	-2.48093	0.0856324
Fam98a	0.524859	-0.611985	-2.05508	0.138793
Calhm6	0.524345	-0.52932	-2.3341	0.102188
Oasl1	0.522733	-0.59197	-2.11124	0.130906
Arhgef10l	0.520304	-0.53678	-2.2917	0.107323
Fam126b	0.519621	-0.566856	-2.18337	0.121151
Chmp4b	0.517256	-0.73462	-1.67612	0.197645
Ogdh	0.516989	-0.92075	-1.223	0.274482
Rnf146	0.514797	-0.64747	-1.90979	0.160291
Nsun3	0.512531	-0.566208	-2.15904	0.124395
Ptbp1	0.511904	-0.641555	-1.91658	0.159253
Ptpn7	0.510602	-0.56297	-2.16283	0.123886
Tmem63b	0.509705	-0.50715	-2.36241	0.0988468
Mfng	0.509547	-0.59832	-2.04158	0.140725
Kctd3	0.508475	-0.562853	-2.15517	0.124914
Ctu1	0.507316	-0.63167	-1.92909	0.15735
Zfp830	0.50556	-0.68413	-1.76933	0.182397
Synj2bp	0.504461	-0.66381	-1.82308	0.173801
Cic	0.503294	-0.50478	-2.3468	0.10068
Gsk3a	0.502761	-0.573773	-2.09635	0.132973
Pde12	0.501829	-0.522634	-2.27331	0.109599
Mfsd13a	0.500801	-0.51968	-2.28035	0.108725
Themis2	0.50057	-0.51756	-2.28741	0.107852
G2e3	0.500444	-0.66758	-1.79685	0.177976
Bora	0.500393	-0.74037	-1.59663	0.210927
Ppp1r7	0.500383	-0.68643	-1.74306	0.186653
Itih3	0.500135	-0.579792	-2.0662	0.137211
Lamtor2	0.499663	-0.71809	-1.65318	0.201455
Ppm1g	0.497557	-0.628827	-1.9005	0.161716
Hspa14	0.496744	-0.612916	-1.9465	0.154718
Irf2bp1	0.496248	-0.65412	-1.8198	0.174321
Ndufa3	0.496119	-0.662658	-1.79439	0.178369
Snrpg	0.495001	-0.9878	-0.96937	0.315418
Arfgap2	0.494964	-0.55838	-2.11862	0.129889
Mto1	0.493343	-0.659596	-1.79251	0.17867
Brpf1	0.492997	-0.559018	-2.10875	0.131251
Tspan33	0.492526	-0.518024	-2.25416	0.112001
Mterf2	0.491703	-0.583405	-2.0216	0.14361
Ttc1	0.490952	-0.763771	-1.49822	0.227614
Mtf1	0.490531	-0.582778	-2.01908	0.143975
Nos1	0.48838	-0.50925	-2.27093	0.109896
Ints14	0.486943	-0.60814	-1.92329	0.158231
Casz1	0.483646	-0.54391	-2.12464	0.129062
F11r	0.48347	-0.62011	-1.87219	0.166092
Rpl18a	0.483028	-0.72226	-1.57603	0.214401
Hes6	0.482121	-0.577654	-2.00284	0.146346
Fastkd3	0.481514	-0.547821	-2.10233	0.132141
Strbp	0.481463	-0.5211	-2.19864	0.119142
Champ1	0.481153	-0.52569	-2.18043	0.121541
Brd2	0.479983	-0.7219	-1.56464	0.216327
Tbc1d10a	0.479368	-0.5383	-2.1275	0.12867
Ptcd1	0.478351	-0.770223	-1.42982	0.239301
Sptb	0.478237	-0.507338	-2.23747	0.11412
Capg	0.477529	-0.56026	-2.04317	0.140496
Txnl4b	0.477267	-0.65427	-1.74438	0.186438
Tepsin	0.477218	-0.56871	-2.01317	0.144836
Gcnt1	0.476792	-0.54055	-2.10908	0.131205
Ahctf1	0.476083	-1.05472	-0.694001	0.353685
Zfp959	0.471488	-0.50573	-2.21607	0.116872
Sgf29	0.471008	-0.59076	-1.91509	0.159481
Thyn1	0.469656	-0.613686	-1.83656	0.171671
Thap4	0.468392	-0.572474	-1.9647	0.151989
Dnase1	0.468254	-0.63919	-1.75257	0.185108
Dazap1	0.467213	-0.48873	-2.26475	0.110669
Glo1	0.465467	-0.527601	-2.10948	0.13115
Acpp	0.465166	-0.51259	-2.1639	0.123742
Acbd6	0.463868	-0.60267	-1.84752	0.169947
Nubpl	0.462379	-0.70211	-1.54589	0.219505
Cadm1	0.459641	-0.48799	-2.23596	0.114313
Nfu1	0.45961	-0.62006	-1.77518	0.181454
Ggnbp2	0.455337	-0.48381	-2.2344	0.114512
Tnfsf18	0.45351	-0.61151	-1.77619	0.181291
Celsr3	0.451816	-0.483912	-2.21894	0.1165
Luc7l2	0.451595	-0.557679	-1.94488	0.154962
C5ar1	0.451524	-0.59281	-1.82742	0.173114
Myo1g	0.450118	-0.498201	-2.15538	0.124886
Asnsd1	0.44949	-0.662255	-1.60485	0.209543
Med24	0.448994	-0.82453	-1.15745	0.285401
Wdfy3	0.446913	-0.492718	-2.16295	0.123869
Rhot2	0.444052	-0.477106	-2.2128	0.117295
Dhrs9	0.443283	-0.512008	-2.07324	0.136215
Hmgn1	0.440836	-0.530532	-1.99435	0.147594
Fam107b	0.439801	-0.54172	-1.94981	0.15422
Ppp6r1	0.43975	-0.76961	-1.25975	0.268292
Cyld	0.439593	-0.46628	-2.23773	0.114087
Fam120b	0.439531	-0.4823	-2.17206	0.122653
Il1b	0.437742	-0.40383	-2.51158	0.0824184
Cdc42bpa	0.436831	-0.520657	-2.01289	0.144877
Fam53a	0.436572	-0.60924	-1.71004	0.19205
Map1lc3b	0.436399	-0.578805	-1.80791	0.176211
Slc25a42	0.436139	-0.490433	-2.12484	0.129035
Mrpl17	0.435608	-0.53404	-1.95882	0.152868
Dennd6a	0.435462	-0.626076	-1.6524	0.201585
Foxred1	0.43532	-0.56671	-1.84369	0.170548
Pex11b	0.435053	-0.47177	-2.19494	0.119627
Mipep	0.434515	-0.63968	-1.60641	0.209281
Pdp1	0.434282	-0.48189	-2.1505	0.125544
Eogt	0.433597	-0.52833	-1.97056	0.151115
Emc9	0.432776	-0.51105	-2.03074	0.142286
Eef1g	0.431711	-0.700582	-1.41415	0.241982
Id2	0.431157	-0.52564	-1.96953	0.151268
Myo1b	0.430815	-0.524874	-1.9708	0.151079
Rnf34	0.430402	-0.49612	-2.07715	0.135664
Pde8a	0.430248	-0.53636	-1.92677	0.157702
Adora2b	0.429835	-0.4933	-2.08558	0.134479
Mtpap	0.429143	-0.57241	-1.79704	0.177946
Sult2b1	0.428992	-0.56252	-1.82983	0.172733
Afg3l2	0.427241	-0.619852	-1.63481	0.204521
Ppp1r26	0.426698	-0.514387	-1.9911	0.148072
Cdc34	0.426162	-0.533563	-1.9185	0.158961
Mrpl41	0.425721	-0.638814	-1.56915	0.215564
Esx1	0.42514	-0.464838	-2.17899	0.121731
Arl15	0.42336	-0.48332	-2.0957	0.133064
Parp2	0.421964	-0.56007	-1.8065	0.176436
Atg16l1	0.421538	-0.69456	-1.38352	0.247222
Dop1a	0.421491	-0.43455	-2.29299	0.107165
Eng	0.419358	-0.51389	-1.95967	0.15274
Katnbl1	0.418541	-0.522117	-1.92548	0.157898
Matn1	0.418265	-0.50132	-2.00217	0.146444
Mtrf1l	0.418037	-0.675097	-1.42391	0.240312
Rpl12	0.417863	-0.69912	-1.3525	0.252523
Gar1	0.417694	-0.88522	-0.81864	0.337402
Agrn	0.417608	-0.48903	-2.04681	0.139974
Zfp111	0.417549	-0.537828	-1.86408	0.167355
Cda	0.417441	-0.55663	-1.79763	0.177851
Arhgap30	0.417293	-0.475113	-2.10089	0.132342
Top2b	0.416628	-0.51207	-1.95395	0.153598
Rfx2	0.415339	-0.4509	-2.19276	0.119913
Usp16	0.413923	-0.616725	-1.583	0.213224
Ndufa13	0.413815	-0.69776	-1.33662	0.255233
Stk40	0.413679	-0.68062	-1.38646	0.246719
Lyrm2	0.412093	-0.49625	-1.99315	0.14777
Klf9	0.411428	-0.51366	-1.92393	0.158134
Zmat3	0.41111	-0.422195	-2.3006	0.106232
Gtpbp8	0.410397	-0.5936	-1.64073	0.203531
Ndufa11	0.409941	-0.52708	-1.86753	0.166817
Inpp4a	0.40933	-0.64589	-1.47012	0.23241
Vmn2r24	0.408677	-0.41358	-2.32925	0.102767
Cir1	0.40861	-0.6086	-1.58367	0.213111
Arih2	0.408002	-0.461631	-2.11296	0.130669
Slc37a4	0.407421	-0.521842	-1.87486	0.165677
Gstp1	0.40728	-0.51257	-1.90857	0.160478
Mideas	0.407102	-0.53674	-1.81935	0.174392
Ttc21b	0.406127	-0.47724	-2.04014	0.140931
Hsd17b14	0.405913	-0.43242	-2.22935	0.115159
Cxcl14	0.405667	-0.49571	-1.96509	0.15193
Fastkd5	0.405022	-0.5374	-1.80715	0.176332
Dusp8	0.404965	-0.516814	-1.88183	0.164597
Casp9	0.404812	-0.561031	-1.72336	0.189867
Hic2	0.403679	-0.41312	-2.3074	0.105403
Usp28	0.403565	-0.4411	-2.17964	0.121645
Zc3h12b	0.403338	-0.399333	-2.37212	0.0977173
Trmt112	0.403115	-0.850946	-0.829111	0.335949
Eif3a	0.402532	-0.83195	-0.88351	0.328215
Zfp787	0.401829	-0.44977	-2.13374	0.127818
Sppl3	0.400297	-0.419114	-2.26298	0.110891
Dnpep	0.400082	-0.514622	-1.86672	0.166944
Nptn	0.399944	-0.461074	-2.07689	0.1357
Nova1	0.397866	-0.5118	-1.86661	0.166961
Srsf11	0.39771	-0.65928	-1.37127	0.249316
P2ry14	0.39533	-0.60371	-1.53476	0.221394
Ndc80	0.393973	-0.722572	-1.1602	0.284946
Cs	0.393506	-0.484121	-1.95209	0.153877
Exoc6	0.393271	-0.65592	-1.35886	0.251437
Sptlc1	0.392259	-0.49057	-1.92063	0.158636
Bmp2k	0.391546	-0.55	-1.69738	0.194133
Atp5c1	0.391042	-0.61616	-1.47293	0.23193
Syne1	0.389899	-0.46328	-2.01884	0.144011
Plxnb1	0.389315	-0.46098	-2.02552	0.143041
Tacc1	0.388631	-0.5842	-1.56566	0.216155
5430427O19Rik	0.388347	-0.47697	-1.95532	0.153392
Lysmd3	0.388219	-0.505535	-1.84315	0.170633
Hs6st1	0.388014	-0.48942	-1.90427	0.161137
Otud3	0.387799	-0.48453	-1.92246	0.158357
Pdia5	0.387619	-0.44586	-2.08122	0.135091
Ndufb2	0.387119	-0.55671	-1.65192	0.201665
Rbm43	0.385415	-0.52863	-1.74337	0.186603
Thap3	0.384118	-0.51024	-1.80498	0.176678
Deaf1	0.38333	-0.464074	-1.98295	0.149276
Ypel4	0.383	-0.46665	-1.97068	0.151097
Wac	0.38208	-0.54699	-1.66066	0.20021
Vps45	0.38178	-0.595	-1.49467	0.228219
Olfr1459	0.381504	-0.451369	-2.02706	0.142818
Fchsd2	0.381488	-0.686405	-1.20131	0.278114
Dpysl2	0.379657	-0.477831	-1.90847	0.160493
Pcsk7	0.379208	-0.4489	-2.026	0.142972
Slc10a3	0.377159	-0.4694	-1.92994	0.157221
Ccdc189	0.377064	-0.4272	-2.11037	0.131027
Eif3f	0.376917	-0.72541	-1.0535	0.302279
Kat14	0.376391	-0.50975	-1.76777	0.182649
Fam122b	0.376032	-0.44085	-2.0446	0.140291
Ndufb5	0.375779	-0.481738	-1.87317	0.16594
Smyd4	0.375655	-0.50815	-1.77005	0.182281
Tbc1d19	0.374444	-0.45975	-1.95592	0.153302
Sltm	0.37409	-0.60118	-1.43369	0.238639
Snrnp70	0.374048	-0.60926	-1.40671	0.243255
Map3k20	0.373834	-0.529785	-1.68029	0.196955
Ngdn	0.373825	-0.65195	-1.26705	0.267057
Timmdc1	0.373558	-0.51616	-1.72916	0.188919
Napa	0.373093	-0.66961	-1.20667	0.277218
Pdcd11	0.37222	-0.68385	-1.15648	0.285561
Serpina3c	0.37205	-0.45394	-1.96801	0.151495
Ube2d1	0.371918	-0.4313	-2.06555	0.137303
Psmc3ip	0.371116	-0.511667	-1.73337	0.188232
Ly6g5b	0.370484	-0.445837	-1.99447	0.147575
Fip1l1	0.370458	-0.59329	-1.44059	0.237458
Cep104	0.368727	-0.45865	-1.93101	0.157058
Marcks	0.368324	-0.497397	-1.77328	0.18176
Cep19	0.367322	-0.48432	-1.81924	0.17441
Zfp9	0.366648	-0.538477	-1.61107	0.208498
Nectin3	0.364482	-0.420849	-2.07388	0.136125
Slc12a5	0.363823	-0.473109	-1.84582	0.170214
Dusp4	0.363004	-0.515215	-1.67737	0.197439
Il21r	0.362423	-0.499794	-1.73294	0.188302
Ubr7	0.362422	-0.3974	-2.17346	0.122466
Surf4	0.361756	-0.54251	-1.57031	0.215368
Dexi	0.361744	-0.45474	-1.91077	0.160141
Hnrnpf	0.3612	-0.53433	-1.59697	0.210869
Agpat5	0.360579	-0.50893	-1.68814	0.195657
Rer1	0.360072	-0.6996	-1.03182	0.305715
Itm2c	0.359966	-0.5664	-1.47571	0.231455
Wars	0.359279	-0.61241	-1.31439	0.259022
Igf2bp3	0.359083	-0.54981	-1.52956	0.222278
Prkaca	0.358231	-0.47623	-1.80346	0.17692
Mrpl11	0.357921	-0.514452	-1.65293	0.201497
Tmem273	0.3579	-0.43488	-1.97591	0.150319
Ccdc124	0.357704	-0.526615	-1.60636	0.20929
Adamts10	0.357682	-0.53642	-1.57024	0.21538
Ccar1	0.356825	-0.517793	-1.63443	0.204584
Adar	0.356779	-0.51206	-1.65577	0.201024
Nap1l2	0.356491	-0.5136	-1.64838	0.202255
Rb1cc1	0.355892	-0.56454	-1.45964	0.234201
Fpgs	0.355236	-0.50298	-1.68201	0.19667
Zfp369	0.354911	-0.469153	-1.81433	0.175189
Gm364	0.354573	-0.468709	-1.81432	0.175191
Mrps23	0.353469	-0.567819	-1.43447	0.238505
Adam17	0.35181	-0.550325	-1.48735	0.229468
Rel	0.350901	-0.463878	-1.81423	0.175206
Sema3e	0.35071	-0.43501	-1.93642	0.156239
Arglu1	0.350545	-0.57559	-1.39051	0.246026
Gid4	0.3505	-0.69486	-0.98494	0.313027
Zfp940	0.349773	-0.416951	-2.01262	0.144916
Arhgef17	0.348795	-0.454882	-1.84026	0.171088
Cox6b1	0.348773	-0.49737	-1.66819	0.19896
Pls1	0.348229	-0.46229	-1.80613	0.176495
Nid2	0.347243	-0.477922	-1.73672	0.187686
Tra2b	0.347035	-0.64111	-1.14448	0.287539
Zfp985	0.34668	-0.49755	-1.65583	0.201014
Nufip1	0.346327	-0.573064	-1.37494	0.24869
Bcl2l11	0.345727	-0.454519	-1.82484	0.173522
Virma	0.344494	-0.56783	-1.38276	0.247352
Camk2n1	0.344165	-0.400912	-2.05692	0.13853
Fbxw4	0.343973	-0.43453	-1.90135	0.161585
Kti12	0.343895	-0.646528	-1.10604	0.293825
Tyk2	0.343627	-0.39019	-2.10606	0.131623
Mak16	0.343407	-0.53775	-1.48525	0.229827
Scyl1	0.342124	-0.55171	-1.42679	0.239819
Ctnnbl1	0.342049	-0.58517	-1.30689	0.260298
Bclaf1	0.341991	-0.43298	-1.89712	0.162236
Nfil3	0.341823	-0.429494	-1.91168	0.160002
Dab2ip	0.341353	-0.50684	-1.58976	0.212084
Zfp316	0.341105	-0.43383	-1.88839	0.163582
Sil1	0.34075	-0.47378	-1.71711	0.190891
U2af1l4	0.340356	-0.595706	-1.25959	0.268319
Ctdsp1	0.340082	-0.515958	-1.54759	0.219216
Bmf	0.339838	-0.496634	-1.62071	0.20688
Cxcr2	0.339492	-0.46967	-1.72678	0.189308
Mmp9	0.339165	-0.450324	-1.80585	0.176539
Thumpd1	0.338972	-0.47482	-1.70278	0.193244
S100pbp	0.338961	-0.48097	-1.67785	0.197358
Prrc2c	0.338448	-0.458632	-1.76664	0.182831
Klhl41	0.337938	-0.42319	-1.91811	0.15902
Tmem8b	0.337213	-0.424883	-1.90634	0.16082
Dock8	0.336916	-0.4184	-1.93413	0.156585
Tbc1d15	0.335775	-0.50551	-1.5627	0.216656
Tfec	0.335522	-0.43807	-1.83808	0.171431
Tor4a	0.334891	-0.41643	-1.93162	0.156966
Hs2st1	0.334651	-0.49807	-1.58513	0.212865
Phactr1	0.334557	-0.48169	-1.64963	0.202046
Pdf	0.33448	-0.48067	-1.65329	0.201436
Polr3g	0.333948	-0.40831	-1.96397	0.152098
Lama5	0.333902	-0.5585	-1.35303	0.252433
Pafah2	0.333653	-0.427062	-1.87618	0.165472
Gtf2f1	0.333636	-0.5902	-1.23725	0.272086
Rrm2b	0.332683	-0.554016	-1.36198	0.250904
Sorbs3	0.33194	-0.46663	-1.6959	0.194377
Zc3h4	0.331257	-0.48973	-1.59818	0.210666
Sgo1	0.331118	-0.61214	-1.14293	0.287794
Arpc2	0.33101	-0.60848	-1.15526	0.285762
Amfr	0.330633	-0.4579	-1.72473	0.189643
Ythdf1	0.330559	-0.443054	-1.78774	0.179435
Tmem154	0.329582	-0.424015	-1.86637	0.166998
Acad9	0.329348	-0.491645	-1.57929	0.21385
Zfp827	0.3291	-0.50775	-1.51458	0.224826
Fkbp1a	0.328991	-0.413243	-1.91227	0.159912
Sla	0.328229	-0.3861	-2.03816	0.141216
Opa1	0.327851	-0.64049	-1.01921	0.307698
Abi3	0.327596	-0.452446	-1.73004	0.188775
Ccdc180	0.326516	-0.409245	-1.91643	0.159276
9930012K11Rik	0.326463	-0.4053	-1.93469	0.156501
Oxct1	0.325908	-0.39061	-2.00224	0.146434
Ugt2b5	0.325534	-0.43234	-1.80534	0.176621
Gbe1	0.325466	-0.4387	-1.77688	0.181181
Snrpe	0.32537	-0.70185	-0.77075	0.343883
Adam9	0.325194	-0.457154	-1.69587	0.194382
Mrps17	0.32498	-0.560862	-1.28879	0.263373
Mmab	0.324642	-0.391551	-1.99015	0.148212
Lilr4b	0.32451	-0.42829	-1.81736	0.174708
Stk25	0.323838	-0.56586	-1.26304	0.267735
Dact1	0.32368	-0.485315	-1.57069	0.215304
Neo1	0.322966	-0.478105	-1.5956	0.2111
Ankhd1	0.322919	-0.42973	-1.80148	0.177236
Htr4	0.322453	-0.44975	-1.71105	0.191885
Serpina1e	0.322452	-0.451894	-1.70186	0.193395
Dhdds	0.321488	-0.59338	-1.14644	0.287216
Ppp1r12a	0.321219	-0.56818	-1.23745	0.272053
Rabl2	0.321144	-0.44754	-1.71271	0.191612
Ptcd3	0.320803	-0.48843	-1.54066	0.220392
Hibadh	0.320592	-0.427578	-1.79723	0.177915
Phf20l1	0.320528	-0.51982	-1.41544	0.241761
Rabac1	0.320395	-0.43985	-1.74162	0.186887
Harbi1	0.320084	-0.429183	-1.78698	0.179557
Scaf1	0.318846	-0.42501	-1.79831	0.177743
Atad2b	0.318027	-0.54712	-1.29537	0.262256
Vmn2r96	0.31791	-0.44559	-1.7016	0.193438
Atp8b5	0.31778	-0.41069	-1.85767	0.168356
Ric8a	0.316883	-0.412773	-1.84254	0.170729
Alas1	0.316544	-0.466601	-1.60393	0.209699
Spice1	0.316224	-0.446877	-1.68576	0.196051
Mrpl53	0.315996	-0.487436	-1.51497	0.224759
Wdr11	0.31581	-0.45951	-1.6292	0.205458
2700097O09Rik	0.315728	-0.41688	-1.81653	0.17484
Fam72a	0.315421	-0.42069	-1.79719	0.177922
Hnrnpab	0.314999	-0.48027	-1.53789	0.220862
Rab8b	0.314821	-0.54921	-1.26643	0.267162
Hmbs	0.314576	-0.397073	-1.9029	0.161347
Tbc1d14	0.313181	-0.4461	-1.67042	0.19859
Cox14	0.313181	-0.485661	-1.50452	0.22654
Mars2	0.31318	-0.65477	-0.85417	0.332425
Slc4a1ap	0.313074	-0.407009	-1.84632	0.170135
Atn1	0.312678	-0.45863	-1.61355	0.208082
Arhgap45	0.312644	-0.43706	-1.70667	0.192604
Zcchc3	0.312598	-0.389881	-1.92585	0.157842
Ptk2	0.312385	-0.39245	-1.91195	0.159961
Cenpw	0.311895	-0.60367	-1.04063	0.304323
Tfcp2	0.311265	-0.396853	-1.88367	0.164311
Rbm39	0.310924	-0.59921	-1.05043	0.302768
Cd2bp2	0.310812	-0.53344	-1.30027	0.261423
Klf11	0.310614	-0.405931	-1.83627	0.171717
Ppbp	0.310608	-0.51633	-1.36561	0.250283
Cd38	0.3106	-0.43012	-1.72489	0.189617
Nme6	0.309828	-0.526157	-1.32203	0.257721
Fam149b	0.309391	-0.452802	-1.61787	0.207357
Aldh8a1	0.309346	-0.514453	-1.36474	0.250432
Mrpl20	0.309238	-0.67424	-0.74063	0.347819
Isca1	0.308683	-0.49143	-1.45243	0.235434
Mrpl37	0.308591	-0.42881	-1.71826	0.190702
Tns4	0.308291	-0.500525	-1.41323	0.242139
Klhl17	0.308161	-0.409995	-1.80193	0.177165
Cfap45	0.30802	-0.468839	-1.5412	0.2203
Gfpt2	0.308013	-0.469034	-1.54034	0.220446
Rxylt1	0.307477	-0.47931	-1.49421	0.228298
Coa5	0.306802	-0.488006	-1.45418	0.235134
Sacm1l	0.306256	-0.52078	-1.31931	0.258184
Lrrfip2	0.306194	-0.39577	-1.85741	0.168397
Sema4d	0.305968	-0.39528	-1.85837	0.168247
Srrd	0.305908	-0.437175	-1.66405	0.199647
Npas2	0.305903	-0.372793	-1.97027	0.151157
Slc25a12	0.305629	-0.39211	-1.87169	0.16617
Phlpp1	0.305596	-0.487113	-1.44999	0.235851
Arl8a	0.304919	-0.436661	-1.66006	0.20031
Tecr	0.304861	-0.575392	-1.09735	0.295235
Rab11fip1	0.304855	-0.422215	-1.72466	0.189654
Olfr56	0.30439	-0.39343	-1.85745	0.168391
Ndufaf4	0.304314	-0.443008	-1.62821	0.205624
Gapt	0.304258	-0.39519	-1.84806	0.169862
Pdgfc	0.30421	-0.436911	-1.65444	0.201245
Ptpn12	0.30416	-0.43444	-1.66511	0.199471
Crtc2	0.30396	-0.453494	-1.58038	0.213667
4930402H24Rik	0.303288	-0.390912	-1.86281	0.167553
Dpy30	0.303228	-0.63077	-0.86712	0.330578
Aif1	0.303	-0.43998	-1.63313	0.204801
Spop	0.302843	-0.53162	-1.2534	0.269364
Hspa2	0.302519	-0.412347	-1.7554	0.18465
Cenpt	0.301989	-0.54838	-1.18166	0.281389
Atp10a	0.301731	-0.44445	-1.60531	0.209466
Rhof	0.301463	-0.40889	-1.76487	0.183117
Napb	0.301385	-0.434727	-1.64607	0.20264
Zdhhc6	0.300605	-0.40299	-1.78734	0.179499
Lgals1	0.300053	-0.55424	-1.14478	0.28749
Akap11	0.299646	-0.41869	-1.70759	0.192453
Entpd3	0.299221	-0.42097	-1.69436	0.19463
Atrn	0.298572	-0.443706	-1.58806	0.212371
Daxx	0.298567	-0.54801	-1.15854	0.28522
Samd10	0.298434	-0.439253	-1.60682	0.209212
Ranbp6	0.298362	-0.461231	-1.51071	0.225485
Zc3h12c	0.29732	-0.46575	-1.48453	0.229949
Wwp1	0.297065	-0.42696	-1.65303	0.20148
Mettl23	0.297029	-0.397724	-1.78962	0.179134
Zfp81	0.296638	-0.43502	-1.61392	0.20802
Aldob	0.296506	-0.44275	-1.57871	0.213949
Hr	0.296332	-0.38798	-1.83274	0.172273
Ctnnbip1	0.29628	-0.41032	-1.72475	0.18964
Zfp62	0.296078	-0.469066	-1.46215	0.233772
Esr1	0.295714	-0.451316	-1.53594	0.221194
Kat2b	0.295582	-0.433488	-1.61384	0.208032
Psmd6	0.295564	-0.57114	-1.04431	0.30374
H13	0.29547	-0.56962	-1.04966	0.30289
Ovgp1	0.294885	-0.39841	-1.77238	0.181905
Rom1	0.294879	-0.43976	-1.5812	0.213528
Epm2aip1	0.294728	-0.48127	-1.40165	0.24412
Arhgap31	0.294714	-0.49406	-1.34846	0.253213
Mms19	0.294589	-0.62657	-0.80907	0.338718
Irgm2	0.294478	-0.45887	-1.49497	0.228168
Heatr1	0.29357	-0.562806	-1.06232	0.300872
Zfand2a	0.293505	-0.382122	-1.84354	0.170572
Lrrfip1	0.293337	-0.377649	-1.86503	0.167207
Cnot4	0.293182	-0.5532	-1.09795	0.295138
Ints6l	0.292979	-0.45575	-1.49837	0.227588
Zfp638	0.292893	-0.48523	-1.3725	0.249106
Prdx4	0.292618	-0.46842	-1.44148	0.237306
Serpina3m	0.292526	-0.461788	-1.46924	0.23256
Crebbp	0.2921	-0.51822	-1.23116	0.273111
Pcyt2	0.29197	-0.623152	-0.799771	0.339987
Me2	0.291838	-0.379778	-1.84442	0.170434
Wdr27	0.291444	-0.44587	-1.53121	0.221997
Gtf2ird2	0.290969	-0.40234	-1.72774	0.189151
Smarcd3	0.290858	-0.432	-1.58915	0.212187
Isca2	0.290609	-0.47759	-1.38876	0.246325
Draxin	0.290506	-0.54067	-1.12829	0.290196
Pfn2	0.290492	-0.448688	-1.51237	0.225203
0610010F05Rik	0.289728	-0.411268	-1.67711	0.197481
Eif3b	0.28965	-0.47836	-1.37883	0.248024
Cdc42bpg	0.288688	-0.46539	-1.42743	0.239709
Mrpl48	0.287872	-0.419344	-1.62695	0.205835
Dnal4	0.287736	-0.45286	-1.47522	0.231539
Rbis	0.287524	-0.533195	-1.13618	0.288903
Tmem35b	0.287397	-0.42192	-1.61184	0.20837
Plekhf2	0.287391	-0.4072	-1.68067	0.196892
Letm2	0.286947	-0.39271	-1.7476	0.185915
Nfatc2ip	0.286937	-0.48752	-1.32103	0.257891
Lbhd1	0.286597	-0.508744	-1.22997	0.273312
Prepl	0.286551	-0.41105	-1.65679	0.200854
Cln6	0.286462	-0.385489	-1.78005	0.18067
Mrpl2	0.28629	-0.461974	-1.42548	0.240043
Enox2	0.286042	-0.411629	-1.65062	0.201882
Pex1	0.285943	-0.45718	-1.4439	0.236892
Lcat	0.285712	-0.430707	-1.56012	0.217092
Apeh	0.28551	-0.40609	-1.67325	0.19812
Atg10	0.285505	-0.382983	-1.78615	0.17969
Rab5a	0.285199	-0.378542	-1.8065	0.176436
Cd47	0.2849	-0.4245	-1.58294	0.213234
Ap4e1	0.284783	-0.50337	-1.23896	0.271799
Tmem119	0.284616	-0.45999	-1.42235	0.240579
Polg2	0.284576	-0.537588	-1.09536	0.295558
Zkscan1	0.284437	-0.443141	-1.49534	0.228105
Zfp35	0.284313	-0.45773	-1.43008	0.239256
Phf21b	0.283759	-0.47502	-1.35135	0.252719
Lrtm2	0.283377	-0.40351	-1.67107	0.198482
Shc4	0.2832	-0.40974	-1.64017	0.203624
Nudcd2	0.28317	-0.42773	-1.5562	0.217756
1110032A03Rik	0.283084	-0.439471	-1.50235	0.226909
Slc12a7	0.282885	-0.43115	-1.53861	0.22074
Stip1	0.282848	-0.52352	-1.14036	0.288216
Taf6	0.282407	-0.53111	-1.10529	0.293947
Arhgef1	0.281909	-0.40527	-1.65258	0.201555
Tufm	0.281739	-0.537407	-1.0737	0.299049
Plxnb2	0.281465	-0.46686	-1.37006	0.249523
Cdkn1a	0.281357	-0.37549	-1.796	0.178112
Rtn4r	0.280788	-0.41181	-1.61376	0.208046
Psmg3	0.280078	-0.55122	-1.00203	0.310381
Dyrk1a	0.27909	-0.47603	-1.31307	0.259246
Ttc41	0.278927	-0.47635	-1.31048	0.259687
Fcgr1	0.278862	-0.51378	-1.15035	0.286572
Tmem254b	0.278494	-0.51016	-1.16281	0.284515
Pygb	0.278443	-0.42715	-1.52582	0.222914
Yaf2	0.278379	-0.416186	-1.57635	0.214347
9430038I01Rik	0.278291	-0.429303	-1.51485	0.224781
Prag1	0.277743	-0.450067	-1.41707	0.241482
Khdc4	0.277524	-0.430674	-1.50311	0.22678
Slc35g1	0.277416	-0.38947	-1.69844	0.193958
Pttg1ip	0.277279	-0.41675	-1.56596	0.216104
Trim65	0.277263	-0.47789	-1.29148	0.262917
Ndufb10	0.277181	-0.47546	-1.3014	0.261231
Nuak2	0.276912	-0.392108	-1.68188	0.196692
Rilpl2	0.276789	-0.420679	-1.5441	0.219808
Wars2	0.276702	-0.44977	-1.41086	0.242545
Fbxl14	0.276541	-0.42031	-1.54407	0.219813
Rfc3	0.2763	-0.454786	-1.3856	0.246866
Vps13b	0.27618	-0.3687	-1.79538	0.178211
Zfand3	0.27599	-0.33213	-1.99443	0.147581
Wbp1l	0.275964	-0.349304	-1.89757	0.162167
Ttr	0.275861	-0.371351	-1.77939	0.180776
Ddhd1	0.275682	-0.39785	-1.6451	0.202802
Pdia4	0.275502	-0.438	-1.45518	0.234963
Trappc1	0.275494	-0.49041	-1.22404	0.274307
Snx15	0.274704	-0.412352	-1.56846	0.215681
Vrk3	0.274535	-0.380211	-1.72472	0.189645
Atp5j	0.274377	-0.50985	-1.13173	0.289633
Nfic	0.272493	-0.41236	-1.5526	0.218367
Trmt10b	0.272458	-0.49495	-1.18081	0.28153
Tmem91	0.272443	-0.399693	-1.61316	0.208147
Mmp19	0.272166	-0.39101	-1.65384	0.201345
Chuk	0.27212	-0.354406	-1.84286	0.170679
Taf12	0.272117	-0.494813	-1.17872	0.281877
Apof	0.272025	-0.46513	-1.30797	0.260113
A530032D15Rik	0.271696	-0.580848	-0.79527	0.340598
Sh3gl1	0.271658	-0.39552	-1.62796	0.205666
Rbfa	0.271354	-0.369598	-1.7568	0.184423
Senp2	0.271089	-0.55644	-0.90077	0.325698
Atf6	0.270991	-0.47047	-1.27648	0.265461
Six1	0.270364	-0.441201	-1.40295	0.243899
Tbkbp1	0.269992	-0.398618	-1.60081	0.210223
Zfp710	0.269936	-0.39276	-1.62921	0.205457
Ift22	0.269765	-0.365144	-1.76883	0.182477
Elf1	0.268973	-0.398602	-1.59352	0.21145
Kalrn	0.268725	-0.50791	-1.09419	0.295747
Nop16	0.268697	-0.51628	-1.05724	0.301683
Mrpl23	0.268682	-0.56809	-0.82483	0.336545
Tmem258	0.268563	-0.471062	-1.2551	0.269077
Recql4	0.268225	-0.48208	-1.20366	0.277721
Fbxo34	0.267857	-0.425737	-1.45569	0.234876
Hhex	0.267482	-0.354484	-1.80944	0.175967
C1qbp	0.266997	-0.4442	-1.36394	0.250569
Adcy6	0.266988	-0.438328	-1.3908	0.245976
Atp6ap2	0.266586	-0.38702	-1.63355	0.204731
Olfr1454	0.266573	-0.44113	-1.37478	0.248716
Cyp2a12	0.266545	-0.40869	-1.52682	0.222744
Kctd20	0.26628	-0.378858	-1.67264	0.198221
Serpinb6a	0.266061	-0.37204	-1.70615	0.192689
Bcas3	0.265874	-0.507113	-1.07384	0.299027
Fnip2	0.265802	-0.48542	-1.16943	0.283419
Dctd	0.265588	-0.396023	-1.58147	0.213483
Yrdc	0.265509	-0.53464	-0.94774	0.318704
Tmed3	0.265485	-0.46416	-1.26185	0.267937
Mocos	0.265362	-0.416011	-1.48299	0.230212
Arhgef12	0.265245	-0.435663	-1.38989	0.246133
Hmgb1	0.265202	-0.536982	-0.934344	0.32072
Alkbh8	0.264997	-0.440996	-1.36337	0.250666
Rasgrp3	0.264156	-0.361649	-1.7469	0.186029
Alad	0.263995	-0.36859	-1.70908	0.192208
Naa16	0.26391	-0.40333	-1.53324	0.221652
Fermt2	0.263807	-0.415272	-1.47487	0.231599
Atp6ap1	0.26374	-0.386468	-1.61546	0.207761
Scarf1	0.263698	-0.39944	-1.55069	0.21869
Ifnar2	0.26337	-0.386896	-1.61058	0.20858
Csnk1g3	0.263344	-0.38293	-1.63042	0.205254
Ttpa	0.26291	-0.37551	-1.66517	0.199461
Hsf4	0.262793	-0.428343	-1.40531	0.243494
Hdac1	0.262621	-0.39536	-1.56278	0.216642
Plekha2	0.26248	-0.39474	-1.5648	0.2163
Tpm1	0.262431	-0.385138	-1.61249	0.20826
Hoxa7	0.262431	-0.432312	-1.38394	0.24715
Rhot1	0.261926	-0.40072	-1.53117	0.222004
Tjap1	0.261763	-0.391659	-1.57478	0.214612
Tmem164	0.261662	-0.41801	-1.44556	0.236608
Dgat1	0.261171	-0.34108	-1.8376	0.171507
Smg9	0.261103	-0.53771	-0.89254	0.326902
Rap2b	0.260944	-0.44064	-1.33362	0.255745
B3gnt8	0.260916	-0.46812	-1.2074	0.277096
Cyp2d9	0.260876	-0.32308	-1.9394	0.155788
Mospd3	0.260845	-0.345183	-1.81225	0.17552
Ust	0.260755	-0.41971	-1.43052	0.239181
Rras	0.260733	-0.361567	-1.72221	0.190055
Bnip1	0.260652	-0.44769	-1.29871	0.261688
Wrap53	0.260466	-0.535414	-0.89714	0.32623
Rpusd3	0.260255	-0.36669	-1.69151	0.195101
Tle3	0.260151	-0.34306	-1.81898	0.174451
Hid1	0.259892	-0.36608	-1.69203	0.195015
Cyp24a1	0.25965	-0.39255	-1.55447	0.21805
Klhl42	0.259563	-0.419693	-1.42143	0.240736
Uchl3	0.259518	-0.419421	-1.42238	0.240573
Mlec	0.259268	-0.43905	-1.32783	0.256732
Srp54b	0.259115	-0.53779	-0.87288	0.329751
Osbpl2	0.258884	-0.39786	-1.52228	0.223516
Ppp1r12b	0.258599	-0.405711	-1.48151	0.230464
Banf1	0.258077	-0.47727	-1.14219	0.287916
Anxa7	0.257758	-0.40229	-1.49183	0.228704
Syne4	0.257663	-0.36997	-1.65491	0.201167
Sap30	0.257238	-0.358516	-1.71252	0.191643
Cracdl	0.257097	-0.35868	-1.71058	0.191962
Rcbtb1	0.257032	-0.37881	-1.60427	0.209641
Apoa1	0.256958	-0.35729	-1.71703	0.190904
Ank	0.25692	-0.446377	-1.27492	0.265725
Atl2	0.256857	-0.48264	-1.10721	0.293635
Scoc	0.256691	-0.46156	-1.20269	0.277883
Ndufb8	0.256567	-0.46763	-1.17368	0.282714
Dstn	0.256202	-0.372942	-1.62835	0.205601
Zfp397	0.255999	-0.383348	-1.57318	0.214883
Gnal	0.255816	-0.368618	-1.64806	0.202308
Zbtb21	0.255431	-0.376809	-1.60242	0.209952
Antxr1	0.255302	-0.36679	-1.6538	0.201352
Dcaf12	0.255246	-0.34126	-1.79252	0.178669
Gm14496	0.255139	-0.451601	-1.23603	0.272292
Haao	0.255104	-0.33864	-1.80626	0.176474
Rnf215	0.255071	-0.39728	-1.49589	0.228011
Rps27rt	0.25498	-0.48452	-1.08223	0.297678
2310061I04Rik	0.254788	-0.465055	-1.17059	0.283226
Eid2b	0.254512	-0.40402	-1.45818	0.234451
Mt2	0.254295	-0.332557	-1.83496	0.171923
Vkorc1	0.254081	-0.47483	-1.11924	0.291676
Ces3b	0.253334	-0.43502	-1.29919	0.261607
Nf2	0.253294	-0.524821	-0.877163	0.329133
Eif2ak3	0.252838	-0.394573	-1.49202	0.228671
Zfyve16	0.252316	-0.365609	-1.63723	0.204115
Phf7	0.252314	-0.39341	-1.49376	0.228375
BC004004	0.252254	-0.36456	-1.64233	0.203264
Cybb	0.252216	-0.33989	-1.7773	0.181112
Bud13	0.2522	-0.4543	-1.19886	0.278523
Sdk2	0.252074	-0.365575	-1.63555	0.204396
Rab18	0.251973	-0.424236	-1.33966	0.254715
Rnf166	0.25191	-0.32289	-1.87347	0.165893
Msn	0.251825	-0.417639	-1.37034	0.249475
Erp29	0.251766	-0.365315	-1.63456	0.204562
P2ry13	0.2517	-0.427147	-1.32345	0.257479
Tasp1	0.251677	-0.35544	-1.68696	0.195852
Sec62	0.251502	-0.48265	-1.06001	0.301241
Mcm8	0.251305	-0.411753	-1.39485	0.245284
Stxbp1	0.25127	-0.378632	-1.56092	0.216957
Smpdl3b	0.251104	-0.393036	-1.48613	0.229676
Lrrc41	0.250919	-0.40093	-1.44515	0.236678
Rdh10	0.250589	-0.400815	-1.4431	0.237029
Acadvl	0.250507	-0.4055	-1.41921	0.241116
Ifi30	0.250418	-0.40992	-1.39671	0.244965
Slc25a1	0.250264	-0.336802	-1.77991	0.180693
Jun	0.250125	-0.39282	-1.47948	0.230812
Cenpb	0.249645	-0.37001	-1.59325	0.211496
Polr3d	0.249466	-0.55597	-0.67599	0.355874
Art2b	0.249448	-0.36834	-1.60053	0.21027
Srfbp1	0.249226	-0.44316	-1.22637	0.273916
Lonrf3	0.248976	-0.34443	-1.72687	0.189293
Coq4	0.24869	-0.400139	-1.43128	0.239051
Snx9	0.248517	-0.360506	-1.63507	0.204477
Nop2	0.248112	-0.52938	-0.80062	0.339872
Rnf138	0.247962	-0.36636	-1.59939	0.210462
Fzd4	0.247513	-0.4897	-0.9897	0.312292
Rab5if	0.247388	-0.415375	-1.34526	0.253759
Myo1e	0.247358	-0.381276	-1.51644	0.22451
Fgf11	0.247258	-0.361269	-1.62109	0.206816
Nck1	0.246727	-0.368141	-1.58019	0.213699
Ankrd52	0.246637	-0.486498	-0.996771	0.311198
Garnl3	0.246603	-0.384516	-1.4937	0.228385
Sfswap	0.246339	-0.50002	-0.92833	0.321619
Amt	0.245688	-0.404633	-1.38443	0.247066
8030462N17Rik	0.245591	-0.392267	-1.44591	0.236548
2310011J03Rik	0.245575	-0.468415	-1.07375	0.299041
Mrm3	0.24537	-0.372569	-1.54599	0.219488
Ttc17	0.24526	-0.378165	-1.5158	0.224619
Tma7	0.245046	-0.39859	-1.40947	0.242782
Cd2ap	0.244764	-0.45849	-1.11408	0.292517
Ankrd23	0.244691	-0.35661	-1.62604	0.205987
Gadd45a	0.244687	-0.377563	-1.51433	0.224869
Aebp2	0.244483	-0.367262	-1.567	0.215928
Mdh2	0.244367	-0.47183	-1.04614	0.303449
Rabgap1l	0.244217	-0.45127	-1.14397	0.287623
Ppp6c	0.243781	-0.44793	-1.15623	0.285602
Vars	0.243748	-0.51777	-0.8125	0.338247
1700025G04Rik	0.243626	-0.42493	-1.26682	0.267096
Rapgef4	0.243553	-0.379277	-1.49622	0.227955
Epop	0.243423	-0.45283	-1.12931	0.290029
Coq2	0.243382	-0.45092	-1.13819	0.288573
Asph	0.243205	-0.40326	-1.37076	0.249403
Mup21	0.242763	-0.43949	-1.18819	0.280302
Tmem86a	0.24271	-0.355649	-1.61548	0.207758
Map2k7	0.24246	-0.40138	-1.37401	0.248848
Man1a	0.242344	-0.465302	-1.05891	0.301417
Slc29a1	0.242025	-0.356086	-1.60759	0.209083
Snrpd2	0.241976	-0.527464	-0.741296	0.347734
Pgam2	0.241943	-0.3497	-1.6421	0.203302
Copb1	0.241698	-0.52098	-0.77278	0.343614
Cep83	0.241596	-0.39261	-1.41135	0.242461
Fam171b	0.241588	-0.418805	-1.27955	0.26494
Frmpd1	0.241562	-0.35307	-1.62041	0.206931
Nlrp3	0.241302	-0.3657	-1.5497	0.218858
Mapk9	0.241203	-0.369253	-1.52991	0.222218
Sec24d	0.241041	-0.439451	-1.1731	0.28281
Dnttip1	0.240951	-0.45879	-1.07769	0.298408
Ppp4c	0.240231	-0.40898	-1.31693	0.258589
Usp14	0.240037	-0.438015	-1.17115	0.283133
Oscp1	0.239922	-0.50792	-0.8215	0.337006
Dipk2a	0.239826	-0.52983	-0.70234	0.352657
Ccdc163	0.239655	-0.41228	-1.29543	0.262246
Cd72	0.239652	-0.35638	-1.58677	0.212588
Fars2	0.239358	-0.377815	-1.46945	0.232525
Atp13a1	0.238883	-0.312132	-1.83662	0.171661
Zfp248	0.238831	-0.324736	-1.76014	0.183882
Myl6	0.23874	-0.433553	-1.18153	0.28141
Cox15	0.23872	-0.44811	-1.10943	0.293274
Hace1	0.238661	-0.39469	-1.37606	0.248497
Zfp282	0.238367	-0.369743	-1.50399	0.22663
Aip	0.238065	-0.408486	-1.30078	0.261337
Phka2	0.238002	-0.4065	-1.31027	0.259723
Brca1	0.23777	-0.428785	-1.19648	0.27892
Adtrp	0.237626	-0.40852	-1.29679	0.262015
Tmx1	0.237623	-0.34604	-1.62755	0.205735
D6Wsu163e	0.237588	-0.391304	-1.38437	0.247076
Htra1	0.237525	-0.40397	-1.31898	0.25824
Ryk	0.237518	-0.40646	-1.30628	0.260402
Sdhd	0.236687	-0.47796	-0.94087	0.31974
Pds5a	0.236035	-0.357236	-1.55234	0.218411
Lypla2	0.235917	-0.37384	-1.4617	0.233849
Vamp8	0.235896	-0.39691	-1.34098	0.25449
Spata24	0.235881	-0.39739	-1.33839	0.254931
Pdss2	0.235243	-0.42043	-1.21561	0.275721
Fancc	0.235114	-0.442377	-1.10424	0.294117
Lifr	0.235087	-0.421829	-1.20715	0.277138
Sod2	0.234917	-0.39177	-1.35906	0.251403
Dnajb2	0.234567	-0.39323	-1.34846	0.253213
Ccnk	0.234436	-0.383868	-1.39613	0.245065
Tcf19	0.234221	-0.356667	-1.54033	0.220448
Ift88	0.234152	-0.401576	-1.30178	0.261167
Smarcd1	0.234016	-0.52272	-0.66904	0.356706
Pum3	0.234001	-0.42387	-1.18697	0.280505
Pitpnb	0.233947	-0.32088	-1.74336	0.186604
Slc35e1	0.233915	-0.36941	-1.46845	0.232695
Tbc1d7	0.233891	-0.43073	-1.15133	0.286411
Sigirr	0.233714	-0.297682	-1.88558	0.164016
C2cd5	0.233702	-0.346315	-1.59362	0.211434
Rhobtb2	0.233483	-0.324658	-1.71698	0.190912
Lmo4	0.233471	-0.342196	-1.615	0.207838
Btf3	0.23341	-0.54258	-0.53516	0.371377
Naip6	0.233109	-0.36109	-1.50671	0.226167
Fcer1g	0.232798	-0.44953	-1.04595	0.303479
Dapp1	0.232791	-0.36983	-1.45662	0.234717
Pink1	0.232614	-0.336232	-1.64201	0.203317
Gpr146	0.232574	-0.443234	-1.07569	0.298729
Tmem39b	0.23255	-0.421397	-1.18618	0.280637
Tax1bp3	0.23233	-0.35593	-1.52847	0.222463
Tmem161a	0.231891	-0.39582	-1.31153	0.259508
Sh3glb1	0.231549	-0.301689	-1.84208	0.170802
Mrpl4	0.231308	-0.47135	-0.91874	0.323046
Ccdc80	0.231211	-0.390382	-1.33388	0.255701
Pced1b	0.231201	-0.32374	-1.70349	0.193127
Brk1	0.231174	-0.370918	-1.43686	0.238096
Lacc1	0.231135	-0.42678	-1.14559	0.287356
Arpc4	0.230989	-0.467204	-0.93697	0.320326
Zfp12	0.230977	-0.39445	-1.31054	0.259677
Nudt5	0.230726	-0.41352	-1.20963	0.276723
Tmub1	0.230673	-0.34504	-1.57535	0.214516
Dmac1	0.230626	-0.41004	-1.22661	0.273876
Endog	0.230487	-0.36021	-1.48918	0.229156
Ddx11	0.230357	-0.47215	-0.90436	0.325171
Tifab	0.230187	-0.373213	-1.41595	0.241674
Mycl	0.230152	-0.378318	-1.38831	0.246402
Pgls	0.230099	-0.389314	-1.32962	0.256427
Akr1b7	0.230036	-0.379978	-1.37845	0.248089
Rab27a	0.230001	-0.373738	-1.41151	0.242434
Cdca5	0.229968	-0.41547	-1.1926	0.279567
Klhl25	0.229722	-0.34026	-1.59452	0.211282
Map2k5	0.229718	-0.369903	-1.42971	0.239319
Mpeg1	0.229626	-0.388518	-1.3296	0.256431
Rhobtb3	0.229576	-0.31523	-1.74125	0.186948
Mindy4	0.228852	-0.36252	-1.46238	0.233733
Nfkbia	0.228803	-0.40925	-1.2139	0.276008
Rpusd2	0.228623	-0.388433	-1.32108	0.257882
Ptch1	0.228214	-0.398401	-1.26497	0.267409
Cplane1	0.228082	-0.357546	-1.48311	0.230192
Mrps34	0.228049	-0.41147	-1.19536	0.279107
Apoo	0.227841	-0.35272	-1.50788	0.225968
Ubap1	0.227833	-0.42471	-1.12475	0.290775
Bpgm	0.227796	-0.32395	-1.67356	0.198069
Hgd	0.227347	-0.40519	-1.2215	0.274733
Echdc2	0.227328	-0.379847	-1.35513	0.252074
Thrap3	0.227285	-0.399133	-1.25261	0.269497
Asrgl1	0.226931	-0.395178	-1.27015	0.266533
Arhgdib	0.226792	-0.34216	-1.55855	0.217358
Snrpa	0.226786	-0.4222	-1.12766	0.290299
Eef1b2	0.226743	-0.438208	-1.04402	0.303786
Il22ra1	0.226714	-0.315847	-1.7133	0.191515
Mex3a	0.226173	-0.33685	-1.58379	0.213091
Ammecr1	0.226142	-0.307151	-1.76222	0.183545
Nupr1	0.226131	-0.382421	-1.33058	0.256263
Akap12	0.226057	-0.34412	-1.54099	0.220336
Pbx4	0.225944	-0.37102	-1.39038	0.246048
Fam117a	0.225435	-0.431507	-1.06586	0.300306
Snd1	0.225173	-0.389256	-1.28536	0.263955
Dnah2	0.224674	-0.355802	-1.46294	0.233637
Nmd3	0.224658	-0.413647	-1.15175	0.286342
Abhd16a	0.22441	-0.33418	-1.58405	0.213047
Meis3	0.22411	-0.31542	-1.69361	0.194754
Eya3	0.224109	-0.368842	-1.38581	0.24683
Rai1	0.223867	-0.357177	-1.4481	0.236174
Tob2	0.223556	-0.38103	-1.31457	0.258991
Arl6ip4	0.223194	-0.36856	-1.37909	0.247979
Septin2	0.22312	-0.35573	-1.44953	0.235929
St3gal1	0.223037	-0.34993	-1.48145	0.230475
Lims1	0.222981	-0.355984	-1.44686	0.236386
Fabp5	0.222856	-0.420237	-1.09936	0.29491
Pelo	0.222801	-0.50657	-0.61251	0.363226
Zfp281	0.222743	-0.331573	-1.58478	0.212924
Slpi	0.222614	-0.363883	-1.3996	0.244471
Mpg	0.222594	-0.32647	-1.61371	0.208055
Tceanc	0.222485	-0.349487	-1.47905	0.230885
Olfr344	0.222435	-0.335447	-1.55937	0.217219
Dynlt1b	0.222387	-0.388315	-1.26451	0.267486
Cadm4	0.221889	-0.35903	-1.42002	0.240977
Prpf3	0.221775	-0.44613	-0.95015	0.31834
Mettl15	0.221277	-0.360466	-1.40646	0.243297
Acaca	0.221049	-0.357294	-1.42213	0.240616
Zfp979	0.220926	-0.37914	-1.30044	0.261394
Pstpip1	0.220921	-0.334606	-1.55091	0.218653
Cers5	0.220847	-0.37539	-1.32016	0.258039
Zfp992	0.220846	-0.41555	-1.10414	0.294134
Malsu1	0.220678	-0.4481	-0.92742	0.321755
E2f7	0.220536	-0.374261	-1.32344	0.25748
Sec23b	0.220524	-0.376808	-1.3094	0.259871
Rhpn1	0.220523	-0.35828	-1.41183	0.242379
Mcam	0.220482	-0.344624	-1.48889	0.229205
Cct5	0.220264	-0.4824	-0.7278	0.349462
Selenom	0.220032	-0.375437	-1.3123	0.259377
Map3k3	0.219955	-0.370211	-1.34031	0.254604
Dclre1a	0.219531	-0.374064	-1.31516	0.258891
Macrod1	0.219482	-0.348241	-1.45916	0.234283
Spata2	0.219115	-0.406224	-1.13677	0.288806
Usf3	0.219039	-0.37782	-1.28992	0.263181
Ccdc62	0.219038	-0.404386	-1.1459	0.287305
Slx1b	0.219035	-0.3706	-1.32959	0.256432
Gm10767	0.219013	-0.47211	-0.77262	0.343635
Coa8	0.218989	-0.35065	-1.44094	0.237398
Snx21	0.218933	-0.384608	-1.25184	0.269627
Ager	0.218914	-0.372169	-1.3198	0.2581
Poli	0.218911	-0.337333	-1.51699	0.224416
Ate1	0.218363	-0.324111	-1.59045	0.211968
Acrbp	0.218326	-0.345703	-1.4632	0.233593
Ngrn	0.218301	-0.373134	-1.30871	0.259988
Smarca5	0.218237	-0.419166	-1.0581	0.301546
Cox4i1	0.217784	-0.382945	-1.24989	0.269956
Ccdc90b	0.217773	-0.37324	-1.30314	0.260936
Btf3l4	0.217641	-0.42905	-0.99815	0.310984
H2-Aa	0.217622	-0.349903	-1.4327	0.238809
Rdx	0.217026	-0.33678	-1.50317	0.22677
Adprm	0.217007	-0.357232	-1.38536	0.246907
Rab8a	0.21697	-0.31754	-1.61788	0.207355
Exoc2	0.216887	-0.35914	-1.37347	0.24894
Taf4	0.216629	-0.34106	-1.47456	0.231652
Poldip3	0.216626	-0.320423	-1.59719	0.210832
Ptpn21	0.215966	-0.341659	-1.46499	0.233287
Pls3	0.215948	-0.33705	-1.49175	0.228717
Ccdc88b	0.215921	-0.288793	-1.79179	0.178786
Txndc17	0.215669	-0.371755	-1.29132	0.262944
Nop9	0.215403	-0.47723	-0.69385	0.353704
Stard7	0.215332	-0.421881	-1.01256	0.308739
Fbxw5	0.215325	-0.364254	-1.32998	0.256366
Mterf3	0.214969	-0.40877	-1.08069	0.297926
Gstt1	0.214915	-0.311165	-1.63879	0.203855
Zfp764	0.214674	-0.33477	-1.49347	0.228424
Fam76a	0.214655	-0.36275	-1.33207	0.256009
Myg1	0.214478	-0.33406	-1.49586	0.228016
Alkbh1	0.214474	-0.36149	-1.33746	0.25509
Foxo4	0.214428	-0.360382	-1.34329	0.254095
Sf3b3	0.214308	-0.46901	-0.72992	0.349192
Mri1	0.214154	-0.30633	-1.66227	0.199943
Mast2	0.213972	-0.32452	-1.54825	0.219104
Mtfp1	0.213842	-0.348957	-1.40299	0.243891
Ap4b1	0.213807	-0.331517	-1.50477	0.226497
Tmem59	0.213805	-0.32775	-1.52726	0.222669
Rundc3b	0.21361	-0.37489	-1.25389	0.269281
Sesn3	0.213576	-0.35267	-1.37913	0.247972
Pura	0.213544	-0.3009	-1.69135	0.195127
Selp	0.213443	-0.340607	-1.44774	0.236235
Vwa1	0.213256	-0.380136	-1.22116	0.27479
Pdhx	0.212842	-0.36169	-1.32069	0.257949
Osgepl1	0.212836	-0.35074	-1.38321	0.247275
Hvcn1	0.212678	-0.367348	-1.2871	0.26366
Cpne8	0.212632	-0.376969	-1.23264	0.272862
Bex3	0.212631	-0.30155	-1.6789	0.197185
Ccser2	0.21256	-0.387527	-1.1731	0.28281
Ddx47	0.212415	-0.46067	-0.75574	0.345859
Zfp619	0.212394	-0.3501	-1.3827	0.247362
Snx14	0.212373	-0.346008	-1.40619	0.243344
Xpot	0.212174	-0.43182	-0.92181	0.32259
Pnrc1	0.212059	-0.35372	-1.35866	0.251471
Fam117b	0.212022	-0.409066	-1.04787	0.303175
Inafm1	0.212016	-0.33171	-1.48699	0.22953
Dag1	0.211862	-0.359973	-1.32098	0.257899
Cpb2	0.211642	-0.34489	-1.40577	0.243415
Morc3	0.21162	-0.44846	-0.8188	0.337379
Rps13	0.211357	-0.47957	-0.61923	0.362475
Cmtm6	0.211048	-0.376706	-1.21832	0.275267
Tex30	0.210908	-0.372678	-1.2396	0.271691
Micu2	0.210765	-0.39492	-1.11343	0.292623
Tbc1d10c	0.210682	-0.367591	-1.26613	0.267213
Cap1	0.210656	-0.46421	-0.70982	0.351727
Chd4	0.210631	-0.427851	-0.92655	0.321885
Scand1	0.210273	-0.3295	-1.48388	0.230061
Clec1a	0.210146	-0.320987	-1.53432	0.221469
Amy1	0.210113	-0.354008	-1.33822	0.25496
Gab1	0.209709	-0.40336	-1.05487	0.302061
Dennd1b	0.209619	-0.381705	-1.17569	0.28238
Papola	0.209533	-0.407	-1.03245	0.305616
Zfp770	0.20949	-0.41869	-0.96571	0.315976
Snx24	0.209459	-0.364322	-1.27261	0.266117
Setmar	0.209384	-0.329968	-1.47266	0.231975
Capn7	0.209335	-0.347027	-1.37118	0.249331
Dand5	0.209313	-0.339257	-1.41661	0.241561
Zfp963	0.208671	-0.30698	-1.6078	0.209048
Tm4sf1	0.208598	-0.38031	-1.17306	0.282817
Sec22a	0.208318	-0.411037	-0.996068	0.311307
9130023H24Rik	0.208283	-0.3917	-1.10533	0.293941
Tsfm	0.208229	-0.38796	-1.12592	0.290584
Myh10	0.207935	-0.33777	-1.41217	0.24232
Slc7a11	0.207715	-0.327	-1.47471	0.231626
Psmc2	0.20771	-0.443995	-0.795637	0.340548
Tpt1	0.207575	-0.379782	-1.16545	0.284077
Sec31b	0.207421	-0.382294	-1.14956	0.286702
Stc2	0.207396	-0.348781	-1.34201	0.254314
Ndufc1	0.207095	-0.36885	-1.2229	0.274498
Oasl2	0.206958	-0.31557	-1.53772	0.220891
Emc10	0.206859	-0.37846	-1.16552	0.284066
Gcgr	0.206453	-0.37411	-1.18616	0.28064
Icosl	0.205759	-0.39902	-1.03617	0.305028
Map7d1	0.205673	-0.32224	-1.4842	0.230006
Slc7a6os	0.205631	-0.46415	-0.63614	0.360556
Dock6	0.205526	-0.30256	-1.60647	0.209271
Naa50	0.205292	-0.33861	-1.3814	0.247584
Canx	0.205048	-0.35121	-1.30443	0.260716
Olfr6	0.20496	-0.38087	-1.13167	0.289643
Gla	0.204956	-0.348645	-1.31859	0.258306
Psma3	0.204561	-0.458736	-0.656776	0.358159
Muc1	0.204304	-0.330485	-1.42057	0.240883
AB124611	0.203942	-0.31667	-1.50196	0.226976
Eif3i	0.203918	-0.427561	-0.84673	0.333479
Igsf11	0.203906	-0.343777	-1.33687	0.255191
Troap	0.20326	-0.37518	-1.14634	0.287233
Chek2	0.203192	-0.327731	-1.4264	0.239886
Clptm1	0.202656	-0.371179	-1.16314	0.28446
Rbm42	0.202369	-0.375148	-1.13695	0.288776
Pbrm1	0.20226	-0.3465	-1.30404	0.260782
Ccl5	0.202166	-0.331542	-1.39301	0.245598
Chpt1	0.201878	-0.39085	-1.03994	0.304432
Macrod2	0.201775	-0.408061	-0.93729	0.320278
Acly	0.201731	-0.37981	-1.10281	0.29435
Dhx36	0.201442	-0.39369	-1.01831	0.307839
B4galnt1	0.201433	-0.40461	-0.95371	0.317801
Trim39	0.201224	-0.34268	-1.31629	0.258698
Tmem248	0.20088	-0.33907	-1.33449	0.255597
Ipcef1	0.200864	-0.36896	-1.1569	0.285492
Limk2	0.200847	-0.35557	-1.23563	0.272359
Actn4	0.200773	-0.342372	-1.31352	0.259169
Slc24a5	0.200667	-0.37598	-1.11354	0.292605
Krt8	0.200579	-0.3517	-1.2558	0.268959
Ccdc103	0.200545	-0.308094	-1.52298	0.223397
Mapre2	0.200406	-0.31307	-1.48999	0.229018
Ccl8	0.200382	-0.329259	-1.38907	0.246272
Paxbp1	0.200292	-0.44423	-0.69062	0.354099
Nsmce3	0.200081	-0.423597	-0.82137	0.337024
Elmod2	0.200061	-0.329811	-1.38245	0.247405
Tmed5	0.199921	-0.36591	-1.16467	0.284207
Coro7	0.199891	-0.359907	-1.19985	0.278358
Ccdc66	0.199789	-0.317706	-1.4547	0.235045
Trim6	0.199757	-0.36312	-1.1794	0.281764
H2-Ke6	0.199428	-0.341118	-1.30725	0.260236
Jmjd6	0.199344	-0.39003	-1.0157	0.308248
Cdkn2aipnl	0.199046	-0.35491	-1.22054	0.274894
Rmdn1	0.198808	-0.311727	-1.48265	0.23027
Bnip2	0.198719	-0.341297	-1.29882	0.26167
Cdca4	0.198576	-0.3537	-1.22277	0.27452
Fhdc1	0.198551	-0.345394	-1.27234	0.266162
Slc30a1	0.198539	-0.36238	-1.17063	0.28322
Mlx	0.198432	-0.3515	-1.2344	0.272566
Rit1	0.198398	-0.356123	-1.20639	0.277265
Tmsb10	0.198279	-0.34693	-1.26023	0.26821
Csf2rb2	0.198251	-0.390626	-0.999343	0.310799
Heatr6	0.198182	-0.356846	-1.19975	0.278374
Kdm3a	0.198139	-0.280442	-1.68273	0.196551
St6gal1	0.197904	-0.327596	-1.37416	0.248822
Pex10	0.197902	-0.40832	-0.88784	0.327586
Epb41l2	0.197894	-0.366831	-1.13708	0.288755
Polm	0.197837	-0.3585	-1.18614	0.280643
Ccdc69	0.197825	-0.34912	-1.24225	0.271244
Mrpl28	0.197813	-0.41523	-0.8438	0.333892
Gon7	0.197619	-0.371334	-1.10719	0.293639
Surf1	0.197604	-0.36933	-1.11897	0.29172
Chchd10	0.197588	-0.353249	-1.21491	0.275838
Swap70	0.197537	-0.330355	-1.35336	0.252376
Fzd5	0.197469	-0.335525	-1.32094	0.257906
Lix1l	0.197175	-0.3213	-1.40586	0.2434
Cnp	0.197175	-0.322063	-1.40108	0.244217
Abca9	0.19683	-0.328633	-1.3567	0.251806
Myo7a	0.196793	-0.343947	-1.26255	0.267818
Fbxo46	0.196473	-0.3657	-1.12806	0.290234
Egfl8	0.196391	-0.328645	-1.35209	0.252593
Minpp1	0.19636	-0.307962	-1.48218	0.230351
Sdcbp	0.19629	-0.32808	-1.35454	0.252175
Nfyc	0.196174	-0.39122	-0.97092	0.31518
Gtpbp3	0.196141	-0.38031	-1.03652	0.304973
Dffa	0.196081	-0.37958	-1.04022	0.304388
Rcc2	0.196075	-0.363421	-1.13731	0.288717
Carf	0.195941	-0.36376	-1.13377	0.289298
Gm14325	0.195793	-0.322515	-1.38408	0.247127
Rabl6	0.195783	-0.3682	-1.10529	0.293947
Sigmar1	0.195541	-0.33788	-1.28629	0.263797
Tex264	0.195519	-0.338425	-1.28271	0.264405
Rrnad1	0.19536	-0.32534	-1.36194	0.250911
Rbm12b1	0.195231	-0.394126	-0.941595	0.319631
Atp6v0d1	0.195126	-0.371375	-1.07866	0.298252
E130311K13Rik	0.195049	-0.378158	-1.03674	0.304938
Slc36a2	0.194969	-0.336	-1.29178	0.262866
Hmgxb4	0.194867	-0.37311	-1.06518	0.300415
Gse1	0.194819	-0.45224	-0.54031	0.370863
Ppa2	0.194806	-0.377641	-1.03702	0.304894
Naa40	0.194688	-0.370411	-1.07944	0.298127
Atad5	0.194468	-0.33745	-1.27752	0.265284
Calhm2	0.194395	-0.334196	-1.29681	0.262011
Zswim4	0.194364	-0.3296	-1.32497	0.25722
Mast1	0.194349	-0.328024	-1.33463	0.255573
AI837181	0.194336	-0.36797	-1.09018	0.296395
L2hgdh	0.194329	-0.327909	-1.33513	0.255487
Bcl2l14	0.194325	-0.34287	-1.24269	0.27117
Atg4b	0.194321	-0.37329	-1.05774	0.301604
Arap3	0.194182	-0.383622	-0.99315	0.311759
Frrs1	0.194173	-0.36124	-1.12915	0.290055
Trdmt1	0.194172	-0.35392	-1.1736	0.282727
Ltbr	0.194155	-0.331998	-1.30787	0.260131
Glyctk	0.193923	-0.30755	-1.46005	0.234131
C330007P06Rik	0.193894	-0.406968	-0.844031	0.333859
Spry2	0.193565	-0.324702	-1.34715	0.253437
Tmem40	0.193306	-0.37451	-1.03838	0.304679
P2ry6	0.193263	-0.36642	-1.08725	0.296868
Cyth1	0.193113	-0.27671	-1.65893	0.200498
Alkbh6	0.193029	-0.34593	-1.2098	0.276694
Sdhaf2	0.192731	-0.353457	-1.16035	0.284921
Sac3d1	0.19261	-0.374596	-1.02957	0.30607
Hnrnph3	0.192595	-0.35629	-1.14147	0.288034
Etv4	0.192545	-0.34809	-1.19118	0.279804
Rspry1	0.192485	-0.35499	-1.14819	0.286928
Tusc2	0.192475	-0.325533	-1.3304	0.256294
Dhx58	0.191844	-0.321949	-1.3463	0.253581
Il1r2	0.19183	-0.288326	-1.56591	0.216111
Tnni3	0.191788	-0.328104	-1.30691	0.260294
Ift80	0.191763	-0.35925	-1.11383	0.292558
Nt5c2	0.191761	-0.336978	-1.2512	0.269735
Hp	0.191621	-0.345317	-1.19799	0.278668
Ptprk	0.191608	-0.370851	-1.04065	0.304319
Mdk	0.191453	-0.297139	-1.50289	0.226818
Psmb8	0.191382	-0.3023	-1.46806	0.232762
Gpr132	0.191355	-0.32858	-1.29926	0.261595
Helz	0.190891	-0.344464	-1.19513	0.279145
Prpf4	0.190538	-0.424337	-0.67817	0.355611
Srp72	0.190256	-0.41105	-0.76634	0.344467
Ttll7	0.190239	-0.307652	-1.4211	0.240792
Ier3	0.190062	-0.337708	-1.22794	0.273652
Zfp13	0.189829	-0.30529	-1.43221	0.238892
Ulbp1	0.189803	-0.31794	-1.35004	0.252943
Gm11992	0.189738	-0.298051	-1.47902	0.23089
Fryl	0.189673	-0.37512	-0.9906	0.312153
Gmps	0.189561	-0.37727	-0.97572	0.314445
Slamf1	0.189194	-0.35154	-1.13187	0.28961
Aasdh	0.189083	-0.35552	-1.10578	0.293868
Uevld	0.18907	-0.323797	-1.30472	0.260667
Mif	0.189017	-0.34179	-1.1907	0.279884
Senp1	0.188998	-0.31523	-1.35881	0.251445
Prox2	0.18897	-0.332213	-1.25032	0.269884
Cdc7	0.188874	-0.381738	-0.93877	0.320056
Iigp1	0.188813	-0.307466	-1.40722	0.243167
Pomgnt2	0.188713	-0.313223	-1.36871	0.249754
Rbl2	0.188684	-0.345479	-1.16383	0.284346
Dclk2	0.188584	-0.343952	-1.17224	0.282953
Khsrp	0.188332	-0.2688	-1.66655	0.199232
Mocs3	0.188312	-0.40364	-0.78816	0.341558
Atp9b	0.188303	-0.34681	-1.15111	0.286447
Rbmxl1	0.188063	-0.42704	-0.61674	0.362754
Cyp4v3	0.188019	-0.30765	-1.39754	0.244823
Map3k14	0.187803	-0.350563	-1.12178	0.291261
Mavs	0.187534	-0.312802	-1.35872	0.25146
Pfdn1	0.187452	-0.357739	-1.07256	0.299232
Ttc30b	0.18744	-0.334668	-1.21768	0.275374
1700066M21Rik	0.187426	-0.337945	-1.19681	0.278865
Cacnb3	0.187351	-0.316476	-1.33292	0.255864
Trim13	0.187318	-0.37007	-0.9931	0.311767
Eif3h	0.187163	-0.39511	-0.82896	0.33597
Pigr	0.187074	-0.271555	-1.63378	0.204692
Cyp20a1	0.186957	-0.37051	-0.98576	0.312901
Sec61g	0.186918	-0.4011	-0.7851	0.341969
Sgsm3	0.186706	-0.323592	-1.28001	0.264862
Col4a3	0.186486	-0.33133	-1.22809	0.273627
Fads1	0.186416	-0.311012	-1.35823	0.251544
Otub2	0.186161	-0.43833	-0.48573	0.376092
Bzw1	0.186059	-0.297995	-1.44045	0.237482
Inpp5k	0.186012	-0.37424	-0.94982	0.31839
Baiap2	0.185879	-0.311551	-1.34884	0.253148
Sec24c	0.185869	-0.396573	-0.80064	0.339869
Kcnh2	0.185839	-0.319739	-1.29518	0.262289
Eola1	0.185673	-0.35208	-1.08693	0.29692
Kctd13	0.185658	-0.290892	-1.48412	0.230019
Mknk1	0.185605	-0.32136	-1.2821	0.264508
Map4k4	0.185604	-0.36617	-0.99638	0.311258
Atp6v1c1	0.18557	-0.38655	-0.86361	0.33108
Kat8	0.185489	-0.37491	-0.93868	0.320069
Nup210l	0.185472	-0.324478	-1.26051	0.268163
Wdpcp	0.185341	-0.326206	-1.24792	0.270288
Ankrd55	0.185324	-0.32327	-1.26663	0.267128
Gstm2	0.185312	-0.34225	-1.14508	0.28744
Pex6	0.185176	-0.319531	-1.28913	0.263315
Slc35b4	0.185105	-0.352762	-1.07573	0.298723
Tmco4	0.184954	-0.29558	-1.4448	0.236738
Arl6	0.184741	-0.318523	-1.2908	0.263032
Clec4d	0.184711	-0.294115	-1.45208	0.235493
1700037H04Rik	0.184607	-0.30847	-1.35509	0.252081
Ddx39b	0.184598	-0.42849	-0.54052	0.370842
Fkrp	0.18453	-0.36865	-0.96672	0.315822
Gskip	0.184456	-0.33349	-1.19103	0.279829
B2m	0.184319	-0.30336	-1.38578	0.246835
Cdc37l1	0.184305	-0.284007	-1.51699	0.224416
Tmem202	0.184299	-0.334231	-1.18446	0.280923
Zfp113	0.184272	-0.313542	-1.31805	0.258398
Nsmf	0.184257	-0.278082	-1.55789	0.21747
Gbgt1	0.184206	-0.333439	-1.18846	0.280257
Cltc	0.184102	-0.372367	-0.93698	0.320324
Mmp8	0.183945	-0.33523	-1.17392	0.282674
Cct2	0.183906	-0.39062	-0.81273	0.338216
Hpn	0.183896	-0.32982	-1.20814	0.276972
Fbxl5	0.183882	-0.293744	-1.44564	0.236595
Srcin1	0.183848	-0.33143	-1.19722	0.278797
Creg1	0.183792	-0.35327	-1.05641	0.301816
Plbd2	0.183539	-0.34994	-1.07469	0.29889
Tmem131	0.18353	-0.340759	-1.13352	0.28934
Desi1	0.183178	-0.329754	-1.20024	0.278293
Pkib	0.182985	-0.34173	-1.12075	0.291429
Asb13	0.182867	-0.34267	-1.11327	0.292649
Park7	0.182667	-0.317896	-1.27146	0.266311
Zmym4	0.182596	-0.307684	-1.33797	0.255003
Rps27a	0.182543	-0.42133	-0.56095	0.368762
Pcdhb17	0.18252	-0.333414	-1.16886	0.283513
Smim14	0.182336	-0.324581	-1.22402	0.27431
Clec4a3	0.18217	-0.29886	-1.39227	0.245725
Itsn2	0.182139	-0.315925	-1.27838	0.265139
Aph1b	0.181819	-0.32652	-1.20537	0.277435
Acap2	0.18178	-0.37273	-0.90339	0.325313
Kif13b	0.181773	-0.274506	-1.55666	0.217679
Trmu	0.181753	-0.321789	-1.2355	0.272382
Fau	0.181683	-0.393566	-0.75898	0.345435
Fam189b	0.181679	-0.32588	-1.2079	0.277012
Atp5j2	0.181637	-0.3305	-1.17732	0.28211
Mettl18	0.181634	-0.308168	-1.32394	0.257395
Slc16a10	0.181569	-0.263177	-1.63663	0.204216
Ap2a2	0.1815	-0.26287	-1.63816	0.20396
Cfdp1	0.181377	-0.35754	-0.99829	0.310962
Ppfia4	0.181356	-0.319405	-1.24652	0.270525
Metap2	0.181325	-0.369059	-0.92165	0.322614
Aqp11	0.181017	-0.31144	-1.2952	0.262285
Kif1b	0.180782	-0.3579	-0.98821	0.312523
Gamt	0.180667	-0.34878	-1.04651	0.303391
Arhgef11	0.180526	-0.31466	-1.26822	0.266859
Abcb6	0.180493	-0.323693	-1.2083	0.276945
Rpp21	0.180382	-0.434111	-0.389005	0.384132
Morf4l2	0.180248	-0.319353	-1.23398	0.272637
Ppp1r15a	0.180205	-0.32305	-1.20913	0.276806
Anxa2	0.18015	-0.32609	-1.1885	0.28025
Mat1a	0.180125	-0.29552	-1.39216	0.245744
Lrrc75a	0.180013	-0.32311	-1.20647	0.277251
Arl5b	0.179984	-0.311315	-1.28418	0.264155
Septin8	0.179839	-0.283771	-1.47013	0.232408
1810037I17Rik	0.179752	-0.381794	-0.81274	0.338214
Slc12a9	0.179669	-0.38225	-0.80832	0.338821
Dbnl	0.179656	-0.312815	-1.27041	0.266489
Ddx28	0.179617	-0.37007	-0.89139	0.32707
Urm1	0.179577	-0.343629	-1.06653	0.300199
Baiap2l1	0.179541	-0.304	-1.32809	0.256688
Prss16	0.179416	-0.31622	-1.24498	0.270784
Pon3	0.179397	-0.31059	-1.28224	0.264484
Zbtb18	0.179269	-0.343657	-1.06246	0.30085
Arhgap24	0.179168	-0.28739	-1.43745	0.237995
Ciita	0.179074	-0.33	-1.14988	0.28665
Whrn	0.179024	-0.300047	-1.34894	0.253131
Riox1	0.178829	-0.30953	-1.28275	0.264398
Rere	0.178774	-0.34105	-1.0734	0.299098
Adh5	0.178632	-0.32516	-1.17648	0.282249
Lig3	0.178301	-0.348651	-1.01707	0.308034
Has1	0.177923	-0.322653	-1.18456	0.280907
Gpr180	0.177858	-0.340358	-1.0664	0.30022
Gprc5c	0.177825	-0.35826	-0.9465	0.318892
Mmp14	0.177485	-0.27667	-1.49423	0.228294
Mrpl10	0.177447	-0.3808	-0.78493	0.341992
Mki67	0.177399	-0.32735	-1.14698	0.287127
Klhl18	0.177325	-0.29572	-1.35909	0.251397
Dync1i2	0.177325	-0.3877	-0.73269	0.348838
Gas2l1	0.177274	-0.30094	-1.32278	0.257593
Gins3	0.177217	-0.39813	-0.65114	0.35882
Prr14	0.177176	-0.314549	-1.2297	0.273356
Cdca7	0.177125	-0.33553	-1.0892	0.296553
Ociad1	0.177079	-0.291808	-1.38325	0.247268
Cfap126	0.177071	-0.299989	-1.32692	0.256887
Prr22	0.177048	-0.33871	-1.06706	0.300114
Prpf4b	0.176974	-0.39664	-0.6586	0.357945
Fuca1	0.176938	-0.33213	-1.10948	0.293266
Tpm4	0.176762	-0.330176	-1.1203	0.291503
Pik3r5	0.176755	-0.292134	-1.37729	0.248287
Pla2g3	0.176723	-0.34974	-0.98905	0.312393
Tcp11l1	0.176675	-0.308517	-1.26437	0.267511
Mex3c	0.176455	-0.29876	-1.32819	0.256671
Urb2	0.176356	-0.360411	-0.91162	0.324101
Esd	0.176308	-0.306043	-1.2768	0.265406
Mtarc1	0.175995	-0.395604	-0.64939	0.359024
Fnbp4	0.175898	-0.377716	-0.783201	0.342224
Bhlhe41	0.175875	-0.3655	-0.86958	0.330225
Flad1	0.175788	-0.345688	-1.00392	0.310087
Mdn1	0.175635	-0.372167	-0.81905	0.337345
Bub1	0.175588	-0.34649	-0.99584	0.311342
Trib1	0.175132	-0.328413	-1.11167	0.29291
Pde4a	0.175131	-0.272536	-1.4976	0.22772
Bin3	0.175017	-0.315838	-1.195	0.279167
B3galnt2	0.174902	-0.28096	-1.43451	0.238498
Setd2	0.174767	-0.3474	-0.97863	0.313998
Prpf38b	0.174699	-0.357592	-0.907685	0.324681
Brap	0.174684	-0.35791	-0.90527	0.325037
Txndc12	0.174673	-0.28183	-1.42571	0.240004
Fuca2	0.174579	-0.308123	-1.24207	0.271275
Cdpf1	0.174361	-0.32212	-1.14443	0.287547
Hnrnpa2b1	0.174329	-0.38094	-0.73427	0.348636
Mthfsl	0.174281	-0.307526	-1.24255	0.271194
Picalm	0.17425	-0.289682	-1.36545	0.250311
Pde7b	0.174159	-0.303856	-1.2662	0.267201
Nlrc3	0.17414	-0.28075	-1.42728	0.239735
Smim15	0.173738	-0.28404	-1.39925	0.244531
Nlrc4	0.173694	-0.3363	-1.03983	0.304449
Pigc	0.173579	-0.317659	-1.16493	0.284164
Tspoap1	0.173555	-0.342759	-0.993926	0.311639
Fam13b	0.173451	-0.33907	-1.01774	0.307929
Cln5	0.173435	-0.30795	-1.2294	0.273407
BC031181	0.173378	-0.33254	-1.06126	0.301042
Mgam	0.173366	-0.304443	-1.25264	0.269492
Ajm1	0.173351	-0.301929	-1.26977	0.266597
Acox3	0.173322	-0.291197	-1.34398	0.253978
Gpsm3	0.173287	-0.328035	-1.09072	0.296307
Tsr1	0.173017	-0.411	-0.44887	0.379345
Zbtb25	0.17267	-0.296684	-1.29794	0.261819
Cpn2	0.17265	-0.34136	-0.99125	0.312053
Rnf26	0.172599	-0.298007	-1.28789	0.263526
Agap3	0.172579	-0.33726	-1.01846	0.307816
Cep43	0.172519	-0.335718	-1.02823	0.306281
Tbc1d2b	0.172468	-0.321712	-1.12332	0.291009
Pebp1	0.172249	-0.30822	-1.21304	0.276152
Zfp593	0.172239	-0.334305	-1.03419	0.305341
Rilp	0.172186	-0.329763	-1.06463	0.300503
Inka1	0.17202	-0.273613	-1.45423	0.235126
Mrpl42	0.172001	-0.310041	-1.19743	0.278762
Ap1ar	0.171859	-0.29106	-1.32762	0.256768
Cars2	0.17185	-0.333588	-1.03393	0.305382
Lzts3	0.171664	-0.289541	-1.336	0.255339
Zfp110	0.171628	-0.30999	-1.19315	0.279476
Tia1	0.171602	-0.31041	-1.18993	0.280012
Pacrg	0.171396	-0.316308	-1.14674	0.287167
Pcgf3	0.171343	-0.286543	-1.35341	0.252368
Neu1	0.171322	-0.338237	-0.99469	0.31152
Ndufa7	0.171267	-0.294255	-1.29807	0.261797
Hnrnpul2	0.171231	-0.345253	-0.944565	0.319183
Tmem81	0.171071	-0.292806	-1.30589	0.260468
C130050O18Rik	0.170974	-0.30639	-1.2099	0.276677
Hscb	0.170713	-0.34599	-0.93202	0.321068
Dram1	0.170606	-0.29978	-1.25136	0.269708
Eif4h	0.170577	-0.320798	-1.10527	0.29395
Saa3	0.170573	-0.31227	-1.16416	0.284291
Lmna	0.170068	-0.35963	-0.82449	0.336592
Kansl2	0.169959	-0.366503	-0.7716	0.343771
Dennd4b	0.169891	-0.27052	-1.45206	0.235497
Mpp6	0.169798	-0.34514	-0.9249	0.322131
Dctpp1	0.169723	-0.316979	-1.12064	0.291447
Zc2hc1a	0.169411	-0.32798	-1.04002	0.304419
Dgkz	0.169352	-0.323967	-1.06719	0.300093
Gnb4	0.169326	-0.276959	-1.39829	0.244695
Homer1	0.169285	-0.300182	-1.2322	0.272936
Aldoa	0.169266	-0.410963	-0.343181	0.387367
Btbd10	0.169237	-0.313463	-1.1388	0.288473
Rbm20	0.169087	-0.263637	-1.49379	0.228369
Dpp9	0.169016	-0.32688	-1.04236	0.304049
Mcf2l	0.168927	-0.305948	-1.18729	0.280452
Abcb1a	0.168892	-0.30579	-1.18796	0.28034
Ttyh2	0.168866	-0.29476	-1.26522	0.267367
Dlx1	0.168592	-0.323977	-1.05695	0.301729
Ltbp4	0.168449	-0.31306	-1.13141	0.289685
Faap100	0.168436	-0.311894	-1.13939	0.288375
Dda1	0.168316	-0.3568	-0.81799	0.337491
Ptpn23	0.168227	-0.320586	-1.07581	0.298711
Sh3pxd2a	0.168067	-0.256115	-1.5389	0.220691
Chrac1	0.167914	-0.29548	-1.2483	0.270225
Apc	0.167904	-0.32614	-1.03244	0.305617
Coq3	0.167826	-0.35347	-0.83503	0.335123
Rph3al	0.167622	-0.30902	-1.14901	0.286793
Spata13	0.167573	-0.305155	-1.17559	0.282397
Dcst1	0.167421	-0.34511	-0.89017	0.327247
Rack1	0.167389	-0.3601	-0.778187	0.342895
Phax	0.167214	-0.35269	-0.83124	0.335653
Zzef1	0.167159	-0.34028	-0.92126	0.322672
Rasa3	0.1671	-0.310258	-1.13349	0.289344
Prim1	0.166903	-0.38171	-0.59285	0.365384
Rad9a	0.16688	-0.37083	-0.68488	0.354799
Nenf	0.166757	-0.302857	-1.18135	0.28144
Lvrn	0.166595	-0.2848	-1.30839	0.260043
Chd7	0.166565	-0.28895	-1.2781	0.265186
Frmd4a	0.166511	-0.31141	-1.1176	0.291943
Bcl2	0.166506	-0.261719	-1.4778	0.231098
Endod1	0.166499	-0.29572	-1.22879	0.273509
Mpc1	0.166434	-0.29674	-1.2207	0.274868
Zfp317	0.166134	-0.30656	-1.147	0.287124
Spef1	0.166028	-0.311014	-1.11399	0.292532
Dguok	0.165954	-0.33223	-0.96175	0.31658
Rpl28	0.165902	-0.382562	-0.56427	0.368417
Bfar	0.165882	-0.326414	-1.00245	0.310316
Slc8b1	0.165854	-0.29813	-1.20336	0.277771
Phc2	0.165502	-0.38049	-0.57487	0.367307
Dlg1	0.165418	-0.29829	-1.19661	0.278898
Anapc2	0.16509	-0.33593	-0.92228	0.32252
Hmox2	0.164806	-0.34634	-0.84082	0.334311
Golga2	0.164563	-0.32534	-0.99147	0.312019
Neurl2	0.164538	-0.29045	-1.24171	0.271335
Tspan15	0.164472	-0.269998	-1.39098	0.245946
Plcl1	0.164431	-0.31193	-1.086	0.29707
Prl8a1	0.164378	-0.31297	-1.07782	0.298387
Cmc1	0.164351	-0.294727	-1.20842	0.276925
Ybey	0.164283	-0.310741	-1.09251	0.296019
Rbmx	0.16426	-0.29446	-1.20917	0.2768
Zfp994	0.16413	-0.307876	-1.111	0.293019
Ubxn2a	0.163899	-0.2703	-1.38168	0.247536
Hspa4l	0.163897	-0.28727	-1.2566	0.268824
Brd3	0.163706	-0.27536	-1.34162	0.25438
Uvssa	0.163679	-0.301554	-1.15042	0.286561
Rbm10	0.163559	-0.35949	-0.71744	0.350772
Rnpep	0.163533	-0.314748	-1.05339	0.302297
Colec12	0.163532	-0.28481	-1.2699	0.266575
Mms22l	0.163528	-0.329397	-0.94693	0.318827
Mrps12	0.163398	-0.33938	-0.87101	0.33002
Arpin	0.163257	-0.31854	-1.0221	0.307245
Ing4	0.162869	-0.293431	-1.19852	0.278579
Hemk1	0.162853	-0.30508	-1.11389	0.292548
Itfg1	0.162636	-0.2979	-1.16299	0.284485
Mettl2	0.162565	-0.30508	-1.10998	0.293185
Elapor2	0.162523	-0.33285	-0.90633	0.324881
Ext1	0.162492	-0.26409	-1.41113	0.242498
Msra	0.162445	-0.29598	-1.1744	0.282594
Clec12a	0.162417	-0.285493	-1.2506	0.269837
Tmem102	0.162376	-0.31568	-1.03042	0.305936
Letmd1	0.162242	-0.290036	-1.21506	0.275813
Pla1a	0.162213	-0.313057	-1.04721	0.303279
Aasdhppt	0.162187	-0.367826	-0.620795	0.362299
Ogt	0.162041	-0.36929	-0.6047	0.36409
Atp8b4	0.161921	-0.28709	-1.23246	0.272892
Ppt2	0.161902	-0.304981	-1.10166	0.294537
Rac3	0.161803	-0.29252	-1.19114	0.279811
Ugt1a7c	0.161756	-0.291231	-1.19995	0.278341
Macf1	0.161651	-0.284148	-1.25059	0.269838
Vgll4	0.161561	-0.282022	-1.26513	0.267382
Tuba8	0.16152	-0.28606	-1.23481	0.272497
Fbxl15	0.161518	-0.281806	-1.26616	0.267207
Ggh	0.161332	-0.297449	-1.14882	0.286824
Ap3m2	0.161329	-0.314054	-1.02742	0.306408
Fkbp11	0.161173	-0.289301	-1.20642	0.27726
Spp1	0.160962	-0.269203	-1.35325	0.252395
Dbndd2	0.160929	-0.31174	-1.0387	0.304628
Srsf5	0.16085	-0.38147	-0.45593	0.37874
Reep6	0.160811	-0.301397	-1.11285	0.292717
Trmt2b	0.160699	-0.30065	-1.11679	0.292075
Gpr19	0.160661	-0.287444	-1.21333	0.276103
Cdc42se1	0.160637	-0.30041	-1.1177	0.291927
Coprs	0.160624	-0.272828	-1.32163	0.257789
Tcof1	0.16048	-0.3472	-0.76248	0.344975
Fcrl1	0.160415	-0.3423	-0.80035	0.339909
Ddias	0.160355	-0.293347	-1.16575	0.284028
Smurf1	0.160158	-0.281444	-1.25119	0.269737
Fcrlb	0.160118	-0.285415	-1.22117	0.274789
Gpr162	0.159968	-0.28127	-1.25	0.269938
Hdac2	0.159911	-0.244356	-1.53351	0.221607
Zfyve28	0.159838	-0.27638	-1.28485	0.264042
Ankrd6	0.159714	-0.313425	-1.00877	0.309331
Jag2	0.159713	-0.283519	-1.22989	0.273324
Ank2	0.159616	-0.32248	-0.9397	0.319916
Cpne2	0.159613	-0.29612	-1.13523	0.289059
Pxylp1	0.159529	-0.27168	-1.31625	0.258705
Tnfrsf18	0.159442	-0.27011	-1.32702	0.25687
Mcat	0.159375	-0.29496	-1.14055	0.288185
Bid	0.159373	-0.255931	-1.43517	0.238385
Mapk8ip3	0.159368	-0.32121	-0.94548	0.319045
Mtcp1	0.159078	-0.30396	-1.06981	0.299673
Dctn4	0.159064	-0.37007	-0.53202	0.371688
Myo1f	0.158844	-0.311805	-1.00812	0.309433
Fah	0.158808	-0.29263	-1.15005	0.286622
Dnm3	0.158725	-0.28702	-1.19065	0.279892
Plaa	0.158714	-0.295977	-1.12391	0.290913
App	0.158604	-0.287607	-1.18464	0.280893
Hspa1l	0.158523	-0.32577	-0.89782	0.32613
St3gal3	0.158466	-0.289036	-1.17212	0.282973
Apold1	0.158217	-0.2761	-1.26577	0.267274
Gpr137b	0.158186	-0.286342	-1.18843	0.280261
Txnrd2	0.158151	-0.32234	-0.91824	0.323121
Kif2a	0.158006	-0.309949	-1.0097	0.309186
Ndufs7	0.157853	-0.30328	-1.0574	0.301658
Trim12a	0.157847	-0.30568	-1.03937	0.304522
Mrpl12	0.157268	-0.37618	-0.41807	0.381886
Ttll11	0.157231	-0.323892	-0.89181	0.327008
Hadhb	0.157154	-0.28678	-1.1711	0.283142
Med29	0.156899	-0.29362	-1.1162	0.292172
Shisa9	0.156791	-0.283324	-1.19215	0.279642
Prr36	0.156365	-0.288086	-1.15037	0.286569
Gsr	0.156325	-0.293565	-1.10852	0.293422
Rrp1b	0.156322	-0.2794	-1.21546	0.275746
Zfp217	0.156295	-0.313063	-0.960443	0.316779
Mrpl46	0.156286	-0.316343	-0.935155	0.320598
Mtfmt	0.155858	-0.30751	-0.9962	0.311286
Arhgef40	0.155819	-0.32105	-0.8913	0.327083
Sema4g	0.155629	-0.30851	-0.9851	0.313003
Chaf1b	0.155568	-0.36779	-0.46908	0.37759
Nptx1	0.155462	-0.285854	-1.15469	0.285856
Klhl8	0.155411	-0.291181	-1.11358	0.292599
Nsmce1	0.155358	-0.350015	-0.64215	0.359865
Zdhhc23	0.155274	-0.31917	-0.89722	0.326218
Vmn2r108	0.155225	-0.28122	-1.18662	0.280563
Prmt6	0.155159	-0.294631	-1.08379	0.297426
Hsd17b10	0.154907	-0.314757	-0.9258	0.321996
Parp9	0.15485	-0.267337	-1.28808	0.263494
Ms4a6d	0.154836	-0.28109	-1.18224	0.281292
Tfpt	0.154793	-0.30402	-1.00684	0.309632
Cav2	0.154731	-0.277716	-1.20658	0.277233
Lyrm9	0.154507	-0.280871	-1.17934	0.281774
Klhl9	0.154244	-0.289133	-1.11251	0.292773
Dyrk3	0.154173	-0.28194	-1.1665	0.283904
Tvp23a	0.153965	-0.296485	-1.05223	0.302481
Csnk1a1	0.153939	-0.343809	-0.669433	0.35666
Snx5	0.153932	-0.31047	-0.9438	0.319299
Acad11	0.153874	-0.29507	-1.06173	0.300967
Adipor2	0.153859	-0.29704	-1.04641	0.303406
Usp33	0.153772	-0.279472	-1.17982	0.281694
Scaper	0.153759	-0.259798	-1.33241	0.255951
Hspbap1	0.153521	-0.28313	-1.1482	0.286926
Ntf5	0.153446	-0.3217	-0.84702	0.333438
Arl4a	0.153271	-0.303532	-0.98746	0.312638
Pdss1	0.153231	-0.267943	-1.26153	0.267991
Cox20	0.153102	-0.316628	-0.88194	0.328443
Serpina1d	0.153008	-0.314718	-0.895588	0.326457
Slc26a10	0.15295	-0.31586	-0.88555	0.327919
Psmb9	0.152929	-0.263522	-1.292	0.262828
2410002F23Rik	0.152906	-0.308496	-0.943053	0.319411
Vsig8	0.152844	-0.28766	-1.10364	0.294215
Tent5c	0.152844	-0.273435	-1.21351	0.276073
Rab29	0.152841	-0.29983	-1.00961	0.3092
Mrps28	0.152816	-0.30519	-0.967514	0.315701
Rnd2	0.15275	-0.27485	-1.20123	0.278127
Cxcl2	0.15274	-0.278936	-1.16947	0.283412
Fhod1	0.152729	-0.287748	-1.1013	0.294596
Tmem168	0.152726	-0.302763	-0.98505	0.31301
Rev3l	0.152723	-0.3079	-0.944829	0.319144
Dlat	0.152697	-0.32066	-0.84271	0.334045
Frmd8	0.152695	-0.262537	-1.29657	0.262052
Hoxb4	0.152614	-0.32966	-0.76688	0.344395
Wasf2	0.152547	-0.32101	-0.83731	0.334804
Dnajb9	0.152535	-0.30829	-0.93878	0.320054
Prr5l	0.152515	-0.30345	-0.97642	0.314338
Xkr8	0.152402	-0.262435	-1.2934	0.262591
Cd5	0.152295	-0.251948	-1.37536	0.248616
Magoh	0.152268	-0.3706	-0.32936	0.388269
Mynn	0.152144	-0.266871	-1.25503	0.269089
Klrg2	0.15201	-0.304533	-0.960038	0.316841
Ugt2b35	0.151839	-0.302405	-0.97407	0.314698
Itpr2	0.151833	-0.297492	-1.01241	0.308763
Lpar2	0.151783	-0.28019	-1.14613	0.287267
Pfkfb4	0.151766	-0.264391	-1.26932	0.266673
Gosr2	0.151728	-0.337783	-0.679276	0.355478
Fbf1	0.151679	-0.283757	-1.11692	0.292054
Dock10	0.151615	-0.29285	-1.0453	0.303583
Rufy3	0.151598	-0.309428	-0.914691	0.323646
Cald1	0.151464	-0.292193	-1.04815	0.30313
Snx29	0.151442	-0.288552	-1.07618	0.298651
Peli1	0.151338	-0.2903	-1.06101	0.301082
Zfp446	0.151186	-0.252686	-1.3546	0.252165
Kdm1a	0.151132	-0.32873	-0.74743	0.346941
Megf10	0.151053	-0.280054	-1.13668	0.288821
Pld2	0.151023	-0.276971	-1.16032	0.284926
Psmd5	0.150979	-0.278365	-1.1488	0.286828
Mllt6	0.150812	-0.273013	-1.18828	0.280287
Vat1	0.150734	-0.32148	-0.80171	0.339723
Abraxas1	0.150607	-0.30165	-0.96061	0.316753
Mrpl54	0.150602	-0.289923	-1.05291	0.302373
Socs5	0.150591	-0.30319	-0.94811	0.318648
Adprhl2	0.150585	-0.281323	-1.11996	0.291558
Trp53inp1	0.150495	-0.28862	-1.0615	0.301003
Gpld1	0.150485	-0.252893	-1.34347	0.254065
Kifbp	0.150457	-0.291019	-1.04211	0.304088
Klhdc1	0.150445	-0.249415	-1.37108	0.249349
Scimp	0.150404	-0.31238	-0.8711	0.330007
Unc5b	0.150368	-0.30782	-0.90744	0.324717
Slc25a17	0.150286	-0.283528	-1.0983	0.295081
Maged1	0.150188	-0.245625	-1.39855	0.244651
Abca3	0.149944	-0.29101	-1.03436	0.305314
Pstpip2	0.149851	-0.259548	-1.28136	0.264634
Scarb1	0.149766	-0.28555	-1.07467	0.298894
Srp9	0.14976	-0.34204	-0.59743	0.364886
Ctrl	0.149724	-0.32232	-0.7763	0.343146
Smad4	0.149597	-0.28543	-1.07307	0.299151
Rfxap	0.149589	-0.27661	-1.14243	0.287876
Ccnyl1	0.149543	-0.264118	-1.24061	0.271521
Nostrin	0.149534	-0.29312	-1.01137	0.308925
Agps	0.149503	-0.281126	-1.10558	0.293901
Nxt1	0.149478	-0.34635	-0.54704	0.370185
Ppp1r3f	0.149475	-0.31324	-0.84813	0.333281
Spag7	0.149396	-0.337182	-0.63647	0.360518
Cybc1	0.149276	-0.301257	-0.94237	0.319514
Rhoq	0.149215	-0.279842	-1.11144	0.292947
Mgrn1	0.149126	-0.285463	-1.0657	0.300332
Ehbp1	0.148938	-0.28711	-1.04981	0.302866
Ptgs1	0.148839	-0.27712	-1.12741	0.29034
Met	0.148827	-0.28359	-1.07601	0.298678
Zfp345	0.148803	-0.27142	-1.17206	0.282983
Zbtb4	0.148721	-0.281705	-1.08935	0.296529
Acsm3	0.148683	-0.294702	-0.985418	0.312953
Coq10a	0.148589	-0.28621	-1.05161	0.30258
Ppp1r10	0.148585	-0.336913	-0.62144	0.362227
Myc	0.148539	-0.27372	-1.14995	0.286638
Nnat	0.148398	-0.250651	-1.33313	0.255829
Dhrs11	0.14835	-0.269117	-1.18382	0.281029
Ercc6	0.148318	-0.292914	-0.99395	0.311635
Espnl	0.148209	-0.26187	-1.23975	0.271666
Prkn	0.148187	-0.25645	-1.2831	0.264338
Gkap1	0.148102	-0.2957	-0.96812	0.315609
Lrp1	0.147909	-0.297918	-0.94707	0.318806
Acot1	0.147858	-0.26445	-1.21404	0.275984
Bmt2	0.147787	-0.252281	-1.31137	0.259536
Taok3	0.147762	-0.274659	-1.13104	0.289746
Mief1	0.147752	-0.242299	-1.39307	0.245588
Snrnp35	0.14775	-0.308238	-0.85972	0.331636
Amdhd1	0.147742	-0.25187	-1.3141	0.259071
Ocrl	0.147658	-0.2917	-0.99323	0.311746
Aldoc	0.147582	-0.2471	-1.35099	0.252781
Mpv17	0.14753	-0.278478	-1.0971	0.295276
Gbp4	0.147342	-0.28322	-1.05632	0.30183
Utp18	0.147175	-0.323078	-0.72106	0.350316
Pycr1	0.147066	-0.28896	-1.0059	0.309779
Usb1	0.146945	-0.28224	-1.05806	0.301552
Fam20c	0.146913	-0.29097	-0.98723	0.312674
Acyp2	0.146912	-0.288581	-1.00652	0.309682
Pqbp1	0.146797	-0.296748	-0.93833	0.320122
Sbno2	0.146795	-0.272449	-1.13435	0.289203
Adgrg1	0.146688	-0.277629	-1.09115	0.296239
Csrp1	0.146564	-0.267841	-1.16799	0.283657
Stam2	0.146521	-0.279787	-1.07126	0.299441
Zmym2	0.146134	-0.31568	-0.76673	0.344415
Bola3	0.146093	-0.30563	-0.85255	0.332655
Tmem159	0.146025	-0.266365	-1.17196	0.282999
Pan2	0.145813	-0.305045	-0.85254	0.332657
Sez6l2	0.145761	-0.278027	-1.07375	0.299041
Ly6i	0.145632	-0.280262	-1.05366	0.302254
Jakmip1	0.145629	-0.278046	-1.07156	0.299393
Zswim3	0.145521	-0.296243	-0.92117	0.322686
Unc13d	0.145486	-0.302625	-0.86723	0.330562
Nono	0.145442	-0.305702	-0.84035	0.334377
Cul4a	0.145426	-0.255171	-1.25434	0.269205
Aga	0.145233	-0.29731	-0.90742	0.32472
Eaf2	0.145092	-0.290322	-0.962933	0.3164
Spi1	0.145078	-0.345717	-0.435084	0.380502
Plek	0.145075	-0.25537	-1.24765	0.270334
Ncor1	0.145067	-0.29514	-0.92267	0.322462
Wdr54	0.144977	-0.27364	-1.09726	0.29525
Zfp346	0.144967	-0.268139	-1.1418	0.287979
Ankrd26	0.14483	-0.323358	-0.670445	0.356539
Apoh	0.144814	-0.273051	-1.09954	0.29488
Ppm1j	0.144799	-0.275044	-1.0831	0.297538
Crip1	0.14476	-0.258437	-1.21791	0.275335
Mrpl40	0.144684	-0.314472	-0.74952	0.346669
Plxdc1	0.144656	-0.300497	-0.870638	0.330073
Ankle2	0.144616	-0.24214	-1.35094	0.252789
Dus3l	0.144603	-0.26095	-1.19502	0.279164
Cmtr2	0.144528	-0.31885	-0.70647	0.352145
Resf1	0.144513	-0.268974	-1.12816	0.290217
Zfp263	0.144481	-0.264353	-1.16539	0.284088
Kcnab1	0.144405	-0.27711	-1.06012	0.301224
Map3k1	0.144393	-0.298542	-0.882562	0.328353
Nqo2	0.14432	-0.250879	-1.2738	0.265915
Mfsd1	0.14422	-0.25726	-1.21966	0.275042
Kiss1r	0.144116	-0.243829	-1.32968	0.256417
Chchd1	0.144049	-0.29912	-0.87162	0.329932
AW146154	0.143953	-0.2667	-1.13824	0.288565
Itga7	0.14386	-0.282261	-1.0092	0.309264
Mtap	0.143842	-0.27667	-1.05487	0.302061
Plekhn1	0.143833	-0.27302	-1.08464	0.297289
Bsdc1	0.143802	-0.253087	-1.24799	0.270277
Cx3cl1	0.143713	-0.26964	-1.11048	0.293103
Lurap1	0.143605	-0.23441	-1.4024	0.243992
Castor1	0.143596	-0.308678	-0.78029	0.342614
Camk1d	0.143526	-0.3002	-0.85306	0.332583
Ciao2a	0.143503	-0.286277	-0.97013	0.315301
Jcad	0.143445	-0.282542	-1.00014	0.310675
Ddx42	0.143398	-0.31351	-0.73281	0.348823
Prodh2	0.143393	-0.29196	-0.92077	0.322745
Ptafr	0.143371	-0.280454	-1.0162	0.30817
Naa80	0.14323	-0.285222	-0.97437	0.314652
Atf3	0.142955	-0.265725	-1.13104	0.289746
Tmem69	0.142923	-0.261405	-1.16618	0.283956
Snx8	0.142899	-0.28589	-0.9633	0.316344
Narf	0.142896	-0.266064	-1.12733	0.290353
Gucd1	0.142874	-0.271439	-1.08267	0.297607
Anp32e	0.142867	-0.316441	-0.694657	0.353605
Septin3	0.142731	-0.256756	-1.20179	0.278034
H2az1	0.142715	-0.325842	-0.59856	0.364763
Tnfsf13	0.142671	-0.28704	-0.94982	0.31839
Cpxm1	0.142647	-0.280922	-1.00054	0.310613
Kdm3b	0.1426	-0.27621	-1.03889	0.304598
Mlxip	0.142526	-0.31379	-0.7125	0.351392
Tcf7	0.142496	-0.26218	-1.1533	0.286086
Dgkd	0.142442	-0.255082	-1.21139	0.276428
Pex3	0.142414	-0.276046	-1.03727	0.304854
Agbl5	0.14213	-0.2826	-0.97799	0.314097
Mafg	0.142101	-0.30325	-0.8001	0.339943
Polr3gl	0.142012	-0.282525	-0.97666	0.314301
Cgas	0.141624	-0.29403	-0.8721	0.329863
Sars2	0.141503	-0.314455	-0.684719	0.354819
Tfam	0.141479	-0.282755	-0.96577	0.315967
Med22	0.141381	-0.34436	-0.32507	0.388541
Ifi209	0.141366	-0.27995	-0.987504	0.312632
Dnaja1	0.141353	-0.305315	-0.767076	0.34437
Nit2	0.141288	-0.270322	-1.06686	0.300146
1110051M20Rik	0.141131	-0.28599	-0.9324	0.321011
Dennd1c	0.141119	-0.279634	-0.98605	0.312856
Rapgef3	0.141102	-0.27923	-0.98917	0.312374
Slc25a32	0.141054	-0.28759	-0.9174	0.323245
Csnk2a2	0.141016	-0.256214	-1.18045	0.28159
Dse	0.14084	-0.28492	-0.93651	0.320395
Tbca	0.140715	-0.319501	-0.61698	0.362727
Fiz1	0.140652	-0.27347	-1.03022	0.305967
Ddah2	0.140522	-0.30448	-0.75825	0.345531
AI413582	0.140519	-0.25202	-1.20817	0.276967
Trim56	0.140438	-0.27654	-1.00081	0.310571
Frg2f1	0.140422	-0.243109	-1.28228	0.264478
Nanos1	0.140363	-0.249113	-1.23037	0.273244
Birc2	0.140218	-0.261086	-1.12726	0.290365
Acbd5	0.140079	-0.30008	-0.78974	0.341345
4921507P07Rik	0.140077	-0.258046	-1.15064	0.286524
Fbxo47	0.139993	-0.28096	-0.95574	0.317493
Taf7	0.139805	-0.289545	-0.8783	0.328969
Gtpbp2	0.139798	-0.285619	-0.91231	0.323999
Tmem18	0.139764	-0.30276	-0.75897	0.345436
Nrarp	0.13974	-0.272156	-1.02632	0.306581
Nrp2	0.139552	-0.25961	-1.12926	0.290037
Osr2	0.139377	-0.297437	-0.80009	0.339944
Sdad1	0.139339	-0.32938	-0.46962	0.377542
Fndc3b	0.139301	-0.29883	-0.78593	0.341858
Mpc2	0.139252	-0.273018	-1.01091	0.308997
Nbeal2	0.139245	-0.296753	-0.80374	0.339447
Il10ra	0.139204	-0.29338	-0.8333	0.335365
Mcoln1	0.139136	-0.267994	-1.05168	0.302569
Lix1	0.13913	-0.261381	-1.10761	0.293571
Matn2	0.138981	-0.260291	-1.11448	0.292452
D11Wsu47e	0.138967	-0.29753	-0.79128	0.341138
Maf1	0.138866	-0.262324	-1.0954	0.295551
Asl	0.138864	-0.30434	-0.72577	0.349719
Naglu	0.138776	-0.28674	-0.88423	0.328111
Rnf6	0.138728	-0.297173	-0.789862	0.341329
L1cam	0.13855	-0.233792	-1.3351	0.255493
Cant1	0.138506	-0.256691	-1.13753	0.288681
Rmdn3	0.138447	-0.26876	-1.03382	0.3054
Rab19	0.138395	-0.261709	-1.09306	0.29593
Igfbp6	0.138304	-0.27473	-0.98025	0.313749
Ndst1	0.138288	-0.247404	-1.21343	0.276086
Neu3	0.138202	-0.2769	-0.95977	0.316881
Iqck	0.138117	-0.27633	-0.96323	0.316355
Chrm4	0.138053	-0.271076	-1.0074	0.309545
Thsd1	0.137979	-0.3072	-0.67902	0.355509
Rab3ip	0.137781	-0.28926	-0.84341	0.333947
Trim17	0.137732	-0.269438	-1.01607	0.30819
Xk	0.137675	-0.253778	-1.14929	0.286747
Lasp1	0.137638	-0.25577	-1.13165	0.289646
Tatdn1	0.137604	-0.270586	-1.00403	0.31007
Flt3	0.13756	-0.24464	-1.22604	0.273971
Icam1	0.137553	-0.257902	-1.11203	0.292851
Hs1bp3	0.137526	-0.283867	-0.8868	0.327738
Haus2	0.137333	-0.27873	-0.92859	0.32158
Mfsd9	0.137239	-0.259392	-1.09419	0.295747
Lpar5	0.137233	-0.27306	-0.97629	0.314358
Hrh1	0.137199	-0.29746	-0.75656	0.345752
Tmco6	0.137102	-0.27729	-0.93711	0.320305
Gabbr1	0.137025	-0.24697	-1.19765	0.278725
Mccc1	0.136991	-0.240886	-1.24986	0.269961
Hps3	0.136976	-0.26541	-1.03809	0.304725
Fbrsl1	0.136952	-0.28369	-0.87781	0.32904
Taf11	0.136919	-0.315664	-0.56501	0.36834
Invs	0.136918	-0.272407	-0.97651	0.314324
S100a11	0.136895	-0.26789	-1.01531	0.308309
Napepld	0.136885	-0.28587	-0.85703	0.332019
Crem	0.136837	-0.251867	-1.15244	0.286227
Cd46	0.136722	-0.232495	-1.31929	0.258187
A430005L14Rik	0.136712	-0.266888	-1.02088	0.307436
Xkrx	0.136616	-0.261141	-1.06895	0.299811
Zic5	0.136562	-0.27646	-0.9348	0.320651
Rcsd1	0.136552	-0.230786	-1.33185	0.256046
Ube3c	0.136521	-0.25705	-1.10268	0.294371
Sumo1	0.13644	-0.28877	-0.8222	0.336909
Tpi1	0.136413	-0.306291	-0.65288	0.358617
Rnf14	0.136343	-0.2583	-1.08899	0.296587
Krt18	0.13632	-0.27831	-0.9141	0.323734
Abcb11	0.136296	-0.260703	-1.06744	0.300053
Xpa	0.136284	-0.27247	-0.96492	0.316097
Tmtc2	0.136243	-0.274034	-0.95047	0.318292
Glod4	0.136216	-0.233362	-1.30401	0.260788
Unc45a	0.136068	-0.29799	-0.72791	0.349448
Irf9	0.136045	-0.250178	-1.15446	0.285895
Gdf15	0.136034	-0.251727	-1.14085	0.288136
Mkks	0.136024	-0.271159	-0.97186	0.315037
Zxdb	0.13592	-0.262065	-1.04937	0.302936
Pitpnm2	0.135883	-0.23978	-1.24247	0.271208
Snx20	0.13583	-0.263813	-1.03267	0.305581
Tysnd1	0.135729	-0.263575	-1.03303	0.305524
Lyar	0.135673	-0.28753	-0.81866	0.337399
Bub3	0.135658	-0.31404	-0.55036	0.369848
Mob2	0.135612	-0.27491	-0.93149	0.321147
Cmc2	0.135559	-0.26832	-0.98866	0.312453
Zmym3	0.135556	-0.27039	-0.97042	0.315257
Wdr62	0.135538	-0.275297	-0.92672	0.321859
Abtb2	0.135507	-0.271969	-0.95563	0.31751
Stoml2	0.135487	-0.28091	-0.87552	0.32937
Gm1673	0.135467	-0.293275	-0.760664	0.345214
Larp1b	0.135417	-0.28781	-0.81104	0.338448
Cep112	0.135399	-0.27086	-0.96351	0.316312
Hdhd5	0.135322	-0.255976	-1.09238	0.29604
Taf13	0.135312	-0.27905	-0.88902	0.327415
Arhgef9	0.135311	-0.261616	-1.04304	0.303941
Dvl1	0.135276	-0.262352	-1.03602	0.305052
Clint1	0.135208	-0.25947	-1.06004	0.301236
Ccdc6	0.135199	-0.30186	-0.6704	0.356544
Sik2	0.135174	-0.25675	-1.08319	0.297523
Bbc3	0.135155	-0.28108	-0.86774	0.330489
Dnajb5	0.13512	-0.262259	-1.0342	0.30534
Pmvk	0.135044	-0.29759	-0.70981	0.351728
Eif4a2	0.135001	-0.268488	-0.977432	0.314182
Syngr1	0.134988	-0.275831	-0.91195	0.324052
S100a4	0.134884	-0.260198	-1.04824	0.303116
Apobec3	0.134809	-0.227463	-1.33525	0.255467
Trim30a	0.134804	-0.262198	-1.02935	0.306104
M1ap	0.134769	-0.28439	-0.83001	0.335824
Rae1	0.134564	-0.32804	-0.31997	0.388861
Ccnl1	0.134489	-0.22136	-1.38566	0.246856
Nde1	0.134481	-0.267351	-0.97834	0.314043
Gpr85	0.134474	-0.255561	-1.08197	0.29772
Gmpr	0.134421	-0.26953	-0.95794	0.317159
Mtg1	0.134306	-0.300242	-0.666539	0.357004
Lgals9	0.134167	-0.25601	-1.0729	0.299178
Tjp3	0.134167	-0.25559	-1.07658	0.298587
Notch4	0.13414	-0.283184	-0.82889	0.33598
Prkcq	0.134079	-0.264836	-0.99357	0.311694
Hmgcs2	0.134039	-0.275229	-0.89987	0.32583
Ces1c	0.134037	-0.273852	-0.91228	0.324003
Arhgef7	0.134026	-0.267835	-0.966	0.315932
Agpat2	0.133977	-0.25717	-1.05949	0.301324
Pccb	0.13388	-0.251433	-1.10835	0.29345
Fbxo15	0.133846	-0.262932	-1.00637	0.309705
Fbp1	0.133841	-0.257639	-1.05306	0.302349
Fbxo3	0.133793	-0.255198	-1.07377	0.299039
Adgre1	0.133677	-0.28516	-0.80116	0.339798
Shmt2	0.133611	-0.25997	-1.02854	0.306232
Vps16	0.13351	-0.290626	-0.74522	0.347227
Flnc	0.133423	-0.255865	-1.06163	0.300983
Spink5	0.133377	-0.26438	-0.98528	0.312975
Ctss	0.133357	-0.250365	-1.10911	0.293326
Lrrc73	0.13328	-0.26482	-0.97963	0.313845
Elovl5	0.133246	-0.26758	-0.95431	0.31771
Txn2	0.133116	-0.28016	-0.83694	0.334856
Zfyve27	0.133064	-0.28412	-0.79861	0.340145
Rmnd1	0.133063	-0.256808	-1.04715	0.303289
Rex1bd	0.13298	-0.265573	-0.96753	0.315699
Trpv4	0.132929	-0.261943	-0.99913	0.310832
Inppl1	0.132789	-0.268257	-0.9399	0.319886
Sgpp1	0.132596	-0.24816	-1.11602	0.292201
Tinf2	0.132528	-0.308329	-0.532064	0.371684
Cdk5rap1	0.132224	-0.260178	-1.00249	0.31031
Ywhae	0.132152	-0.26818	-0.9289	0.321534
Pcf11	0.132016	-0.27285	-0.88351	0.328215
Tpm3	0.132012	-0.27802	-0.83521	0.335098
Slirp	0.131959	-0.270458	-0.90446	0.325156
Mthfr	0.13195	-0.262238	-0.97908	0.313929
Sec23a	0.131928	-0.29415	-0.67465	0.356035
Ccl2	0.131914	-0.255467	-1.0393	0.304533
Mylpf	0.131873	-0.26237	-0.97651	0.314324
Vmn2r97	0.131805	-0.260877	-0.98876	0.312438
Nr6a1	0.131785	-0.247904	-1.10474	0.294037
Parp1	0.131783	-0.28082	-0.80404	0.339406
Rhbdd2	0.13177	-0.256549	-1.02708	0.306462
Kdelr2	0.131642	-0.298439	-0.622041	0.362159
Taf10	0.131621	-0.29327	-0.67668	0.355791
Abi1	0.131589	-0.241127	-1.16213	0.284627
Ugt2a3	0.131572	-0.255969	-1.02884	0.306185
Kdm4b	0.131518	-0.254651	-1.03973	0.304465
Wdr13	0.131504	-0.242625	-1.14729	0.287076
Mrps18b	0.131499	-0.28355	-0.77176	0.34375
Dusp6	0.131441	-0.22915	-1.2678	0.26693
Rabl3	0.131314	-0.243049	-1.14035	0.288218
Fam207a	0.131302	-0.296393	-0.63595	0.360578
Tnfrsf9	0.131264	-0.239104	-1.17498	0.282498
Cycs	0.131223	-0.292014	-0.68053	0.355326
Xpr1	0.131173	-0.26221	-0.9653	0.316039
Plcb3	0.131169	-0.262459	-0.962961	0.316396
Cdh24	0.131063	-0.246846	-1.10203	0.294477
Lhfp	0.131017	-0.237458	-1.18576	0.280707
Retsat	0.13078	-0.228117	-1.26671	0.267115
Eif2b5	0.130768	-0.31168	-0.43418	0.380577
Gtf3c5	0.130736	-0.27677	-0.8215	0.337006
Pbk	0.13073	-0.25057	-1.0628	0.300796
Mmp2	0.130616	-0.25782	-0.99516	0.311448
Ankrd42	0.1306	-0.26123	-0.96378	0.316271
Egr4	0.130585	-0.248258	-1.08117	0.297848
Dmxl1	0.130553	-0.27417	-0.8426	0.334061
Vnn3	0.130543	-0.27013	-0.88047	0.328655
Cnbd2	0.130449	-0.273043	-0.851213	0.332845
Sdhb	0.130432	-0.286763	-0.71659	0.350879
Otc	0.130389	-0.26628	-0.91337	0.323842
Cenpf	0.13038	-0.26245	-0.94855	0.318582
Pitrm1	0.130362	-0.24625	-1.09549	0.295536
Rbms2	0.130223	-0.25505	-1.01334	0.308617
Tuft1	0.130188	-0.26677	-0.905	0.325076
Git1	0.130149	-0.261929	-0.949073	0.318503
Zfp667	0.130047	-0.231468	-1.22431	0.274262
Cyp2c37	0.130007	-0.25469	-1.01276	0.308708
9130008F23Rik	0.129991	-0.28309	-0.74397	0.347389
Tbc1d25	0.129967	-0.243139	-1.11693	0.292053
Zfp60	0.129893	-0.28496	-0.72291	0.350082
Ssb	0.129766	-0.275138	-0.81743	0.337569
Csrnp2	0.129716	-0.247745	-1.07082	0.299512
Serping1	0.129707	-0.226743	-1.26213	0.267889
Ccdc88a	0.129664	-0.233668	-1.19797	0.278671
[truncated: 9,711 more rows]
