# Supplementary material for: Mitochondrial respiration contributes to the interferon gamma response in antigen-presenting cells
Source: eLife. 2021 Nov 2;10:e65109. doi: 10.7554/eLife.65109 (PMC8598164; doi:10.7554/eLife.65109)
Supplement: Supplementary file 1. [file elife-65109-supp1.xlsx]

## Sheet: Sheet1
SupplementaryFile5: Oligos and Primers used in this study
sgRNA Sequences
Name/Target	sgRNA sequence
sgIfngr1_1	TATGTGGAGCATAACCGGAG
sgIfngr1_2	GGTATTCCCAGCATACGACA
sgIrf1_1	CTGTAGGTTATACAGATCAG
sgIrf1_2	CGGAGCTGGGCCATTCACAC
sgPtpn2_1	AAGAAGTTACATCTTAACAC
sgPtpn2_2	TGCAGTGATCCATTGCAGTG
sgNdufa1_1	TGTACGCAGTGGACACCCCG
sgNdufa1_2	CGCGTTCCATCAGATACCAC
sgNdufa2_1	GCAGGGATTTCATCGTGCAA
sgNdufa2_2	ATTCGCGGATCAGAATGGGC
sgStat1_1	GGATAGACGCCCAGCCACTG
sgStat1_2	TGTGATGTTAGATAAACAGA
sgOstc_1	GCGTACACCGTCATAGCCGA
sgOstc_2	TCTTACTTCCTCATTACCGG
sgCnbp_1	AGGTAAAACCACCTCTGCCG
sgCnbp_2	GTTGAAGCCTGCTATAACTG
RT-PCR Primer
Primer	Sequence
RT_Actb-1F	GGCTGTATTCCCCTCCATCG
RT_Actb-1R	CCAGTTGGTAACAATGCCATGT
RT_Cd274-1F	GCTCCAAAGGACTTGTACGTG
RT_Cd274-1R	TGATCTGAAGGGCAGCATTTC
RT-Ciita-1F	AGACCTGGATCGTCTCGT
RT-Ciita-1R	AGTGCATGATTTGAGCGTCTC
RT-Gapdh-1F	TGGCCTTCCGTGTTCCTAC
RT-Gapdh-1R	GAGTTGCTGTTGAAGTCGCA
Mitochondrial Quantification Primers
Name/Target	Sequence
Mm-Nd1-1F	CTAGCAGAAACAAACCGGGC
Mm-Nd1-1R	CCGGCTGCGTATTCTACGTT
Mm-Hk2-1F	GCCAGCCTCTCCTGATTTTAGTGT
Mm-Hk2-1R	GGGAACACAAAAGACCTCTTCTGG
